# Supplementary material for: Single cell-spatial transcriptomics and bulk multi-omics analysis of heterogeneity and ecosystems in hepatocellular carcinoma
Source: PubMed Central journal article supplement — NPJ Precis Oncol. 2024 Nov 15;8:262. doi: 10.1038/s41698-024-00752-1 (PMC11568154; doi:10.1038/s41698-024-00752-1), 2024-11-15

## **Supplemental Material**

- 1. Supplementary Figures**
- 2. Supplementary Tables**
- 3. Supplementary file 1**

# 1. Supplementary Figures

**a**

| Sample  | Gender | CNLC  | Hepatitis | AFP/(ug/L) | TD/mm   | ES     | RFS/days | MVD  | Spots | Cells  | Cells Ratio |
|---------|--------|-------|-----------|------------|---------|--------|----------|------|-------|--------|-------------|
| HCC1    | M      | III-A | B         | 2.35       | 48*33   | II     | /        | <50  | 3,320 | 9,759  |             |
| HCC2    | M      | III-A | B         | 35496      | 118*75  | III-IV | 66       | <50  | 2,811 | 10,346 |             |
| HCC3    | M      | I-B   | -         | 3.31       | 62*55   | II     | /        | >200 | 2,870 | 9,111  |             |
| HCC4    | M      | II-A  | B         | 9.22       | 35*27   | II     | /        | >50  | 2,461 | 12,744 |             |
| CIR 4   | M      | II-A  | B         | 9.22       | 14*13   | II     | /        | -    | 3,679 | 10,689 |             |
| HCC5    | M      | I-B   | B         | 131.6      | 155*124 | II-III | 248      | >50  | 4,046 | 8,098  |             |
| HCC6    | F      | I-A   | B         | 3.29       | 31*18   | II     | /        | <50  | 2,408 | 9,536  |             |
| Control | F      | /     | B         | 1.66       | /       | /      | /        | -    | 4,029 | 11,415 |             |

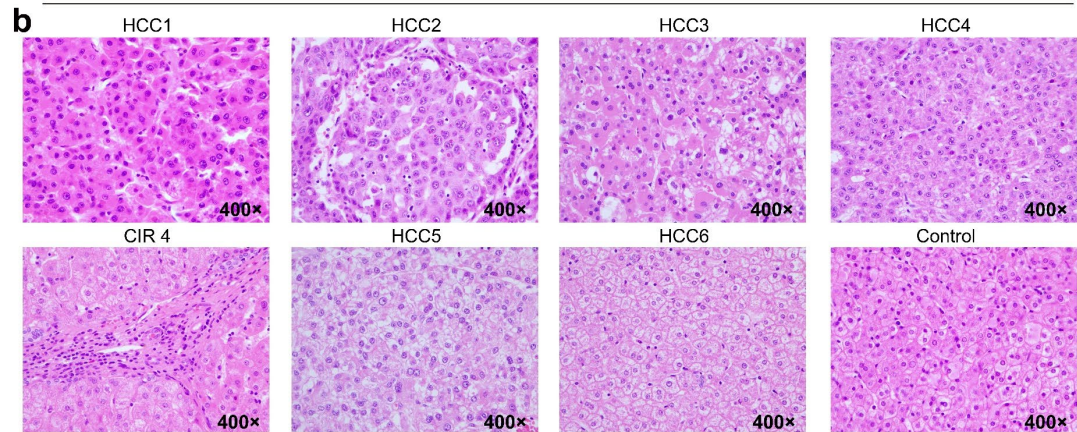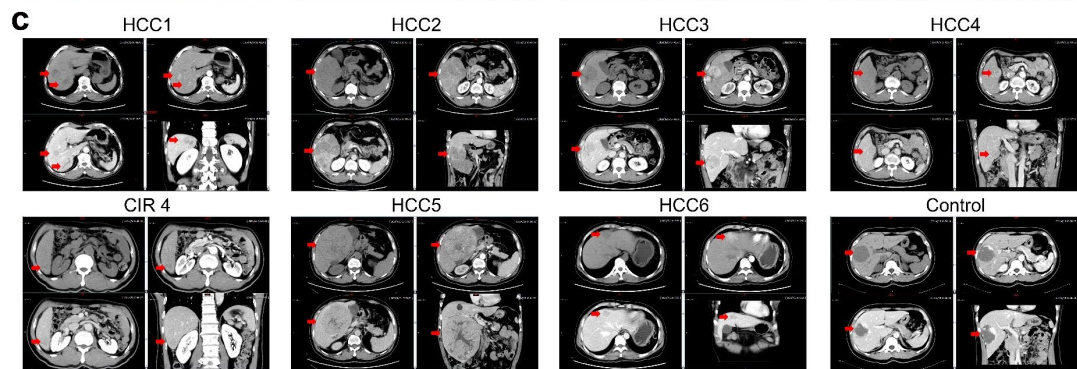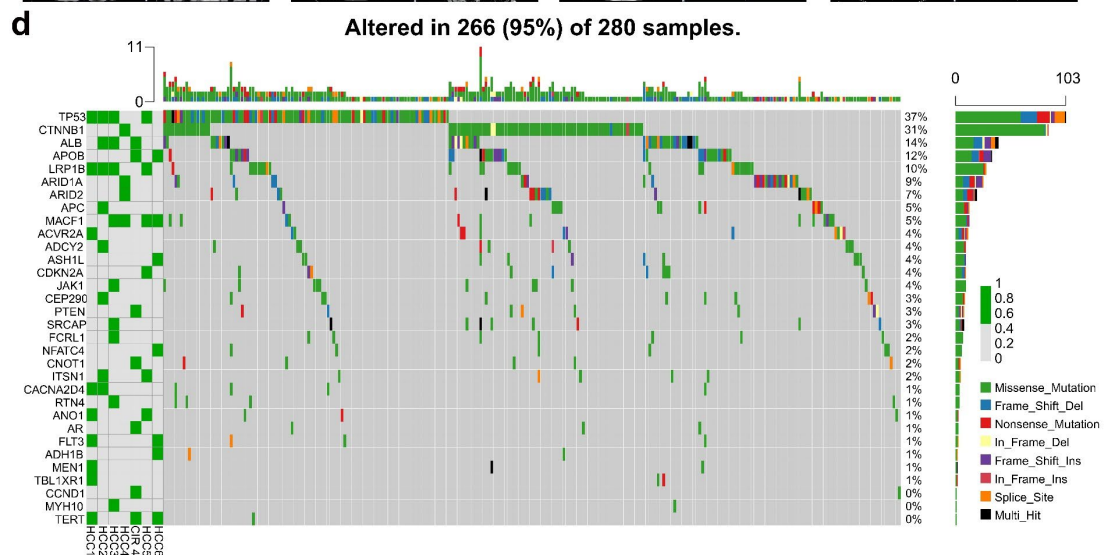

**Supplementary Figure 1. Clinicopathological and genomic characteristics of HCC patients and control donor (related to Fig. 2)**

(a) Clinicopathological characteristics of HCC patients and control donor. MVD was determined by unit: 200×/HPF. Cell ratio was divided by a pie chart, with red color denoting the HCC cells and blue color denoting CIR cells.

Abbreviation: CNLC: China liver cancer staging, AFP: alpha-fetoprotein, TD: tumor dimension, ES grade: Edmondson-Steiner grade, RFS: relapse-free survival, MVD: microvascular density.

(b) H&E stained pathological sections of the HCC patients and control donor, the scale bars represent 20μm.

(c) Contrast enhanced computed tomography images of the patients and control donor.

(d) Waterfall plot showing the 32 genes (rows) most frequently altered among the HCC patients in our study and the Cancer Genome Atlas Liver Hepatocellular Carcinoma (TCGA-LIHC) cohort (columns). The upper panel shows the mutational burden per sample from TCGA-LIHC. The right panel showing the percentages the of mutations frequency per gene and the mutation types labeled in colors.

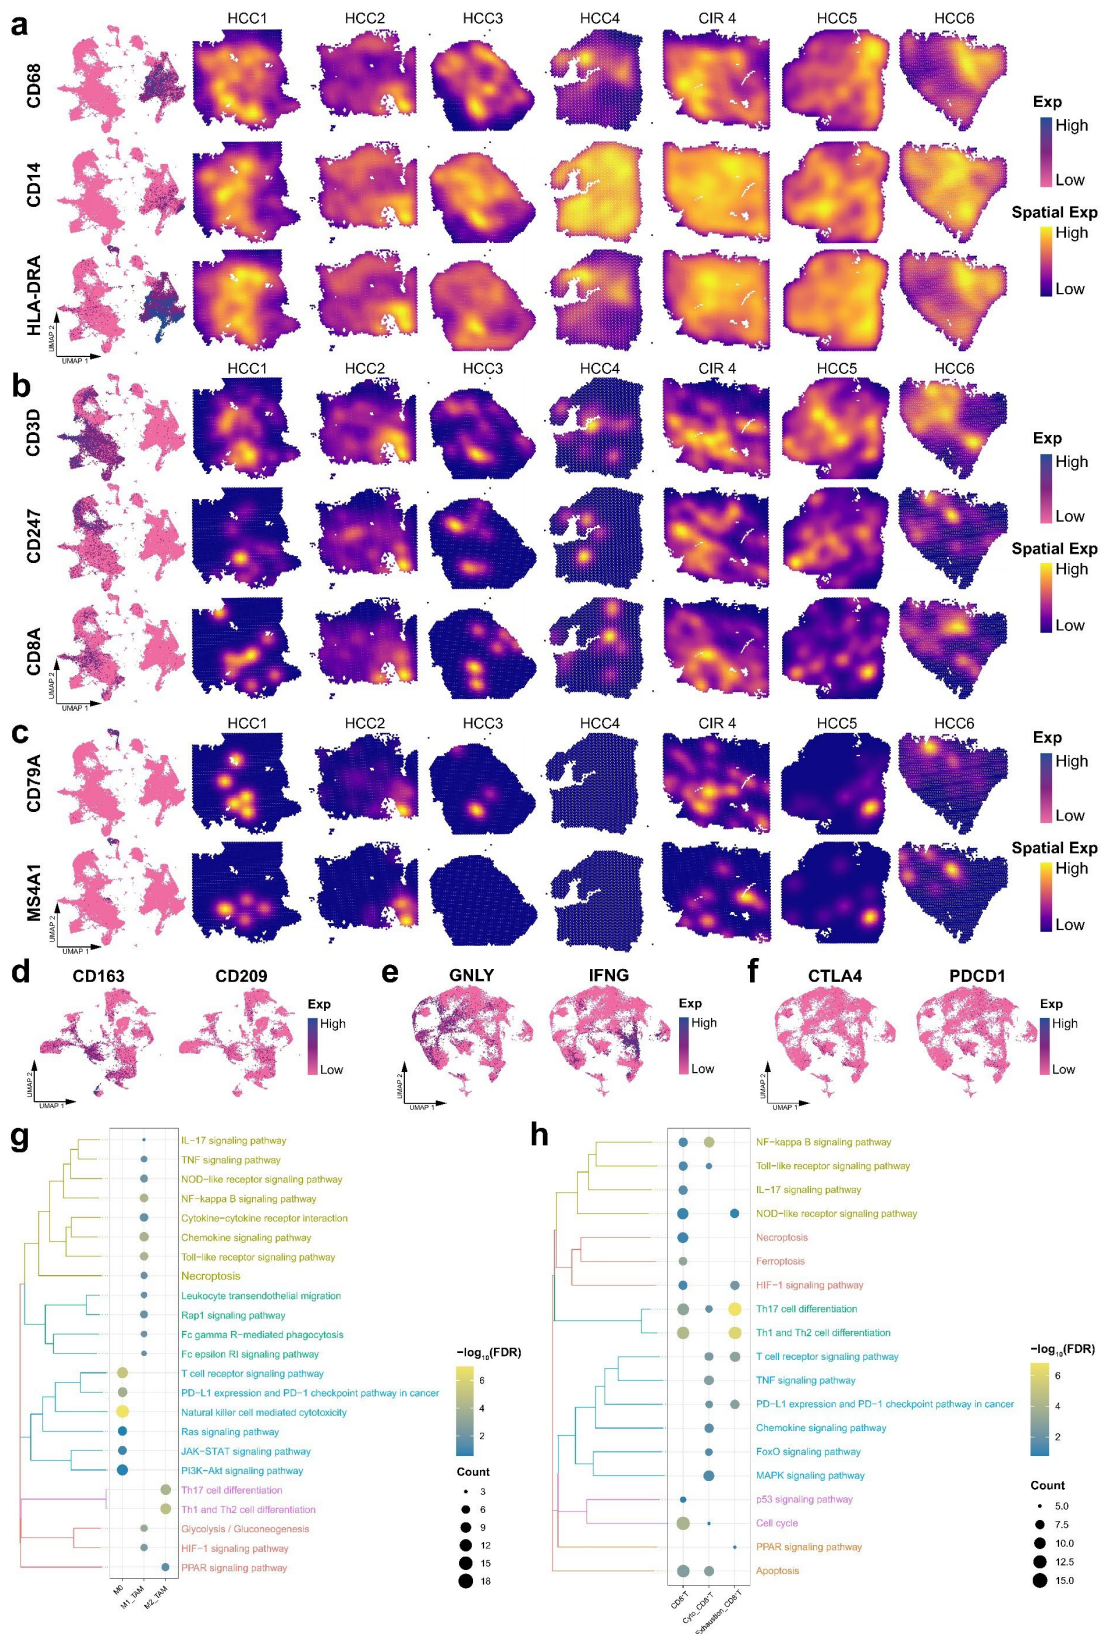

**Supplementary Figure 2. Marker gene expression and pathways enrichment of immune cell subpopulations of HCC and CIR (related to Fig. 4, Supplementary Table 2 and Supplementary Table 3)**

(a and b and c) UMAP plot and spatial feature plot showing the visualized distribution of specific markers of macrophage (a), CD8<sup>+</sup> T cell (b) and B cell (c).

(d) UMAP plots showing the distribution of specific markers of M2 macrophages.

(e and f) UMAP plots showing the distribution of specific markers of cytotoxic CD8<sup>+</sup> T cells (e) and exhausted CD8<sup>+</sup> T cells (f).

(g and h) Bubble plot showing the pathway enrichment of the macrophages (g) and CD8<sup>+</sup> T cell (h) subpopulations.

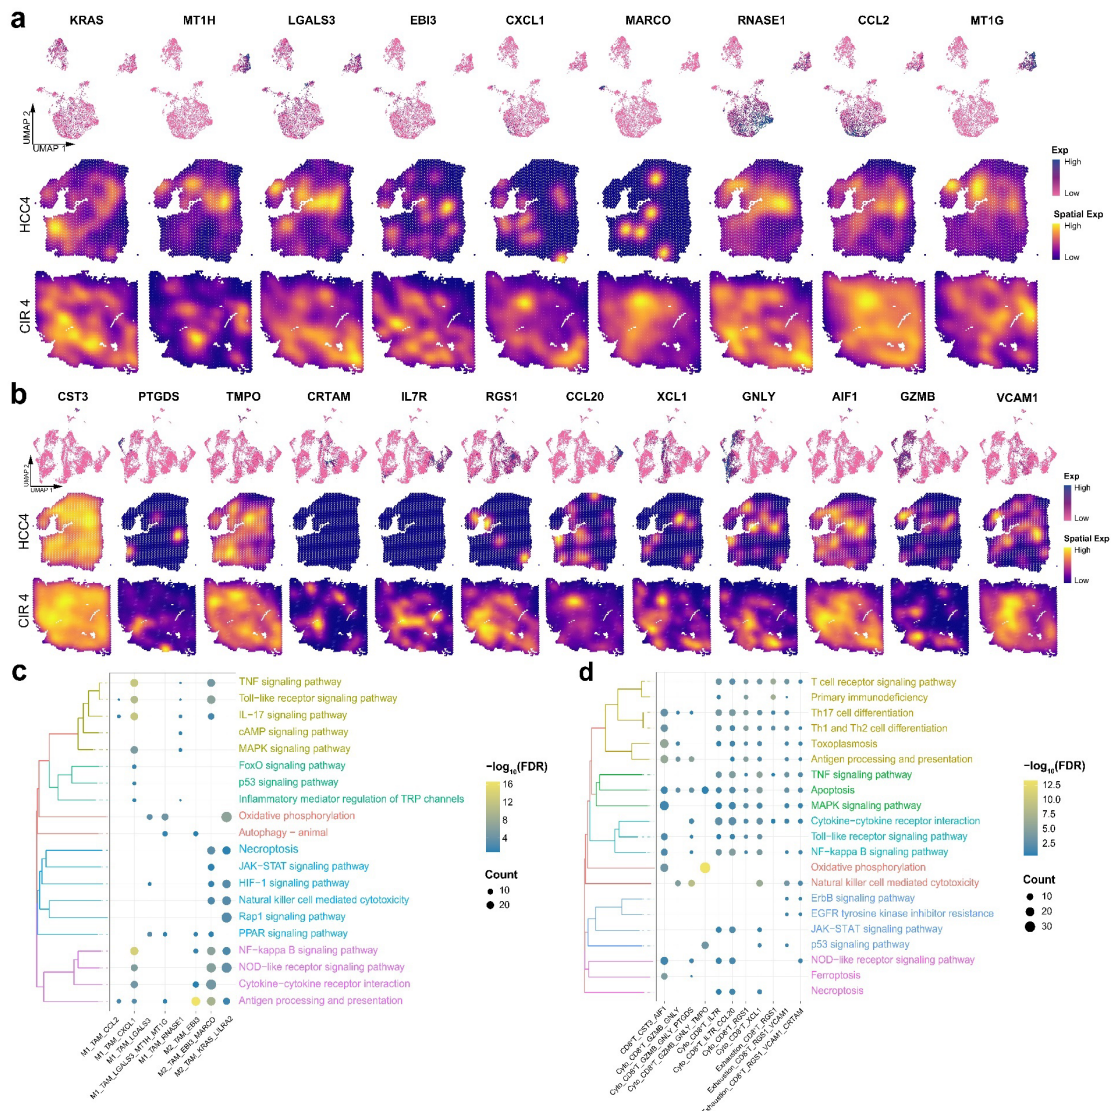

**Supplementary Figure 3. Marker gene expression and pathways enrichment of immune cell subpopulations of HCC4 and CIR4 (related to Fig. 6, Supplementary Table 6 and Supplementary Table 7)**

(a) UMAP plot and spatial feature plot showing the visualized distribution of specific markers of macrophage subpopulations of HCC4 and CIR4.

(b) UMAP plot and spatial feature plot showing the visualized distribution of CD8<sup>+</sup> T cell subpopulations of HCC4 and CIR4.

(c and d) Bubble plot showing the pathways enrichment of macrophage (c) and CD8<sup>+</sup> T cell (d) subpopulations of HCC4 and CIR4.

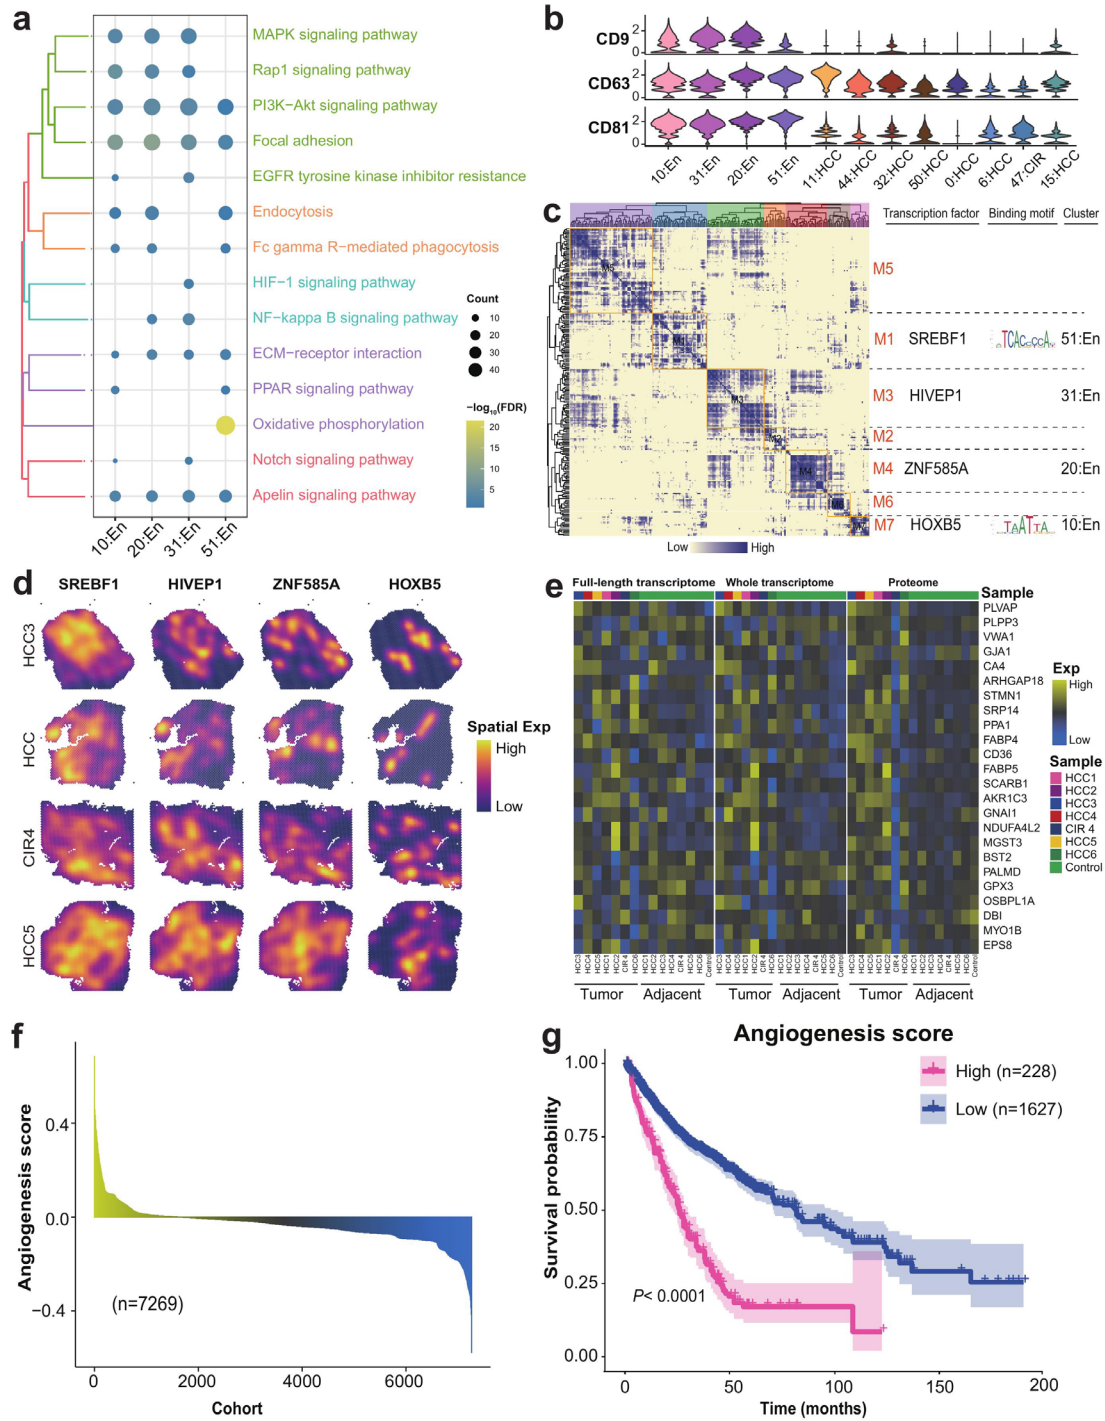

**Supplementary Figure 4. Analysis of the ecological niche of angiogenesis in HCC (related to Fig. 7 and Supplementary Table 8)**

(a) Bubble plot showing the pathways with significant participation of specific markers of endothelial cell subpopulations.

(b) Violin plot showing the expression of exosome marker genes (CD9, CD63, CD81) in the endothelial cell, HCC cell, and CIR subpopulations.

(c) Heatmap representing the gene regulatory network (GRN) of endothelial cell subpopulations. Left: Identification of the regulon modules based on the Connection specificity index (CSI) matrix of regulons; Middle: Representative transcription factors (TFs) of modules and their binding motifs; Right: Relationships of modules with endothelial cell clusters.

(d) Spatial feature plot showing the distribution of TFs that regulate endothelial cell cluster of HCC3, HCC4, CIR4 and HCC5.

(e) Heatmap representing the average expression of ecological niche genes of angiogenesis at the full-length transcriptome, whole transcriptome, proteome, and single-cell RNA levels.

(f) Bar chart showing the ecological niche gene set scores of angiogenesis of the HCC cohorts from The Cancer Genome Atlas (TCGA-LIHC), Gene Expression Omnibus (GEO) and International Cancer Genome Consortium (ICGC-LIRI).

(g) Survival curves demonstrating the HCC patients had significant better overall survival with lower angiogenesis scores compared to that with higher angiogenesis scores from the TCGA-LIHC, GEO and ICGC-LIRI cohorts.



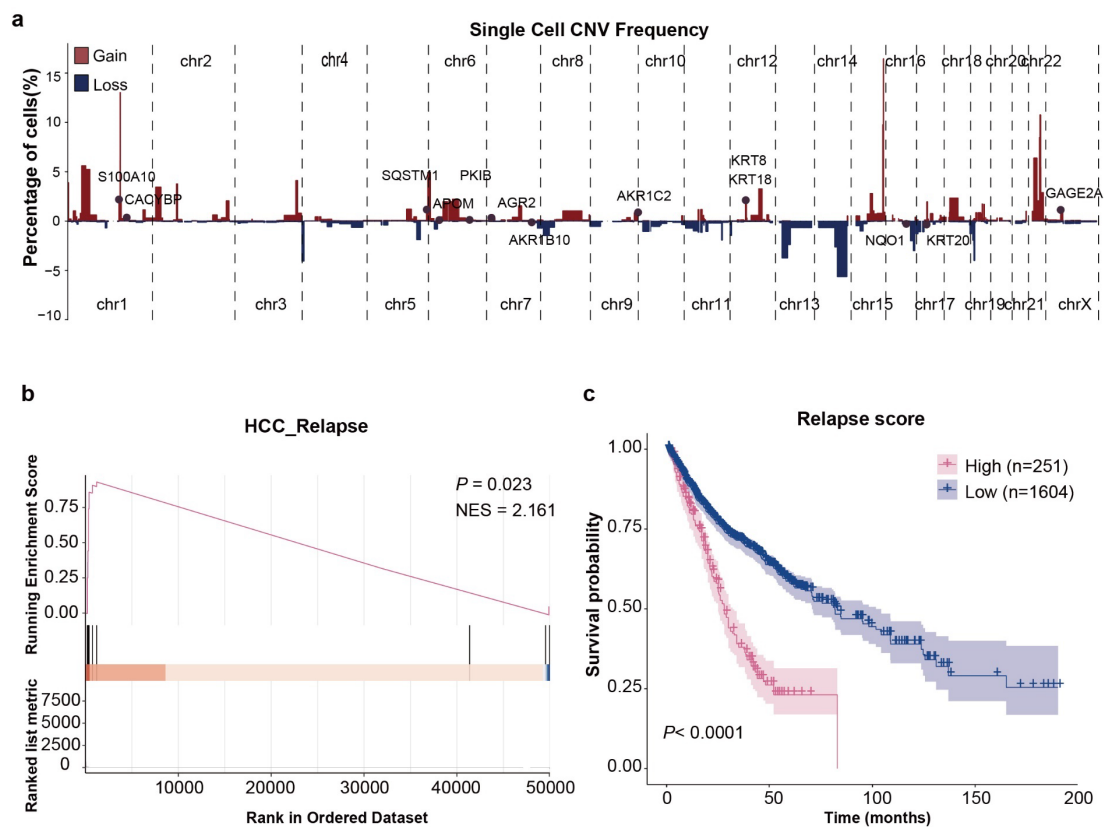

**Supplementary Figure 5. Prognostic value of recurrence score in HCC patients (related to Fig. 8)**

(a) CNV frequencies of ecological niche genes of HCC recurrence in HCC2 at the single-cell level, with red color denoting copy number gain and blue denoting copy number loss.

(b) Gene set enrichment analysis (GSEA) plot indicating significant enrichment of ecological niche genes of HCC relapse in the independent HCC cohort. NES: normalized enrichment score.

(c) Survival curves demonstrating the HCC patients had significant better overall survival with lower recurrence scores compared to that with higher angiogenesis scores from the TCGA-LIHC, GEO and ICGC-LIRI cohorts.

## 2. Supplementary Table

Supplementary Table 1. Metabolites expressed in both HCC and cirrhosis (related to Figure 3)

| Group | ID       | KEGG_annotation | HMDB_ID     | Name                           | AveExpr_Metabolome_Tissue | Control_Metabolome_Tissue | Case_Metabolome_Tissue | logFC_Metabolome_Tissue | AveExpr_Metabolome_Blood | Control_Metabolome_Blood | Case_Metabolome_Blood | logFC_Metabolome_Blood |
|-------|----------|-----------------|-------------|--------------------------------|---------------------------|---------------------------|------------------------|-------------------------|--------------------------|--------------------------|-----------------------|------------------------|
| HCC4  | neg_149  | --              | --          |                                | 0.00000376                | 2.80308E-06               | 0.0000162              | 2.530910572             | 3.19771E-05              | 1.99301E-05              | 0.000116306           | 2.544901568            |
| HCC4  | pos_3062 | --              | --          |                                | 2.01101E-06               | 1.65032E-06               | 0.0000067              | 2.021419338             | 2.19375E-07              | 8.07143E-08              | 0.00000119            | 3.881993723            |
| HCC4  | pos_1922 | --              | --          |                                | 1.87864E-06               | 1.54931E-06               | 0.00000616             | 1.991306659             | 4.20706E-05              | 2.19614E-05              | 0.000182835           | 3.057498463            |
| HCC4  | pos_247  | C04555          | --          | Dehydroepiandrosterone sulfate | 2.32866E-06               | 1.95E-06                  | 0.00000729             | 1.904649971             | 2.20763E-07              | 1.51014E-07              | 0.000000709           | 2.231100595            |
| HCC4  | neg_945  | C05466          | --          | Glycochenodeoxycholate         | 2.22429E-06               | 1.87769E-06               | 0.00000673             | 1.841645833             | 0.000007675              | 4.62857E-06              | 0.000029              | 2.647414009            |
| HCC4  | pos_4059 | --              | --          |                                | 4.2115E-06                | 3.56E-06                  | 0.0000127              | 1.835471763             | 5.25875E-07              | 2.93857E-07              | 0.00000215            | 2.871149788            |
| HCC4  | pos_2997 | --              | --          |                                | 2.65786E-06               | 2.25231E-06               | 0.00000793             | 1.815916936             | 3.4375E-07               | 0.00000017               | 0.00000156            | 3.197939378            |
| HCC4  | neg_413  | --              | --          |                                | 4.86433E-05               | 0.00004124                | 0.000144886            | 1.81280196              | 0.0000132                | 8.31429E-06              | 0.0000474             | 2.511222828            |
| HCC4  | neg_2128 | C18043          | HMDB0000653 | Cholesterol sulfate            | 2.66349E-05               | 2.30298E-05               | 0.0000735              | 1.674239476             | 1.34538E-05              | 8.44714E-06              | 0.0000485             | 2.521449392            |
| HCC4  | pos_1844 | --              | --          |                                | 0.000005125               | 4.51154E-06               | 0.0000131              | 1.537875422             | 0.000152466              | 7.89924E-05              | 0.000666779           | 3.077422124            |
| HCC4  | pos_329  | --              | --          |                                | 0.000011881               | 1.05642E-05               | 0.000029               | 1.456875683             | 1.95538E-05              | 9.06143E-06              | 0.000093              | 3.359420296            |
| HCC4  | pos_1451 | --              | --          |                                | 1.01619E-05               | 9.26661E-06               | 0.0000218              | 1.234214934             | 0.00000259               | 1.40286E-06              | 0.0000109             | 2.957888127            |
| HCC4  | pos_3618 | --              | --          |                                | 0.000022555               | 2.09823E-05               | 0.000043               | 1.035163302             | 3.19465E-05              | 1.93433E-05              | 0.000120169           | 2.63515999             |
| CIR4  | neg_2128 | C18043          | HMDB0000653 | Cholesterol sulfate            | 2.66349E-05               | 0.0000157                 | 0.000168788            | 3.426375875             | 1.34538E-05              | 7.20429E-06              | 0.0000572             | 2.989087844            |
| CIR4  | neg_149  | --              | --          |                                | 0.00000376                | 2.63385E-06               | 0.0000184              | 2.804462783             | 3.19771E-05              | 1.87694E-05              | 0.000124431           | 2.728889321            |
| CIR4  | pos_2997 | --              | --          |                                | 2.65786E-06               | 0.00000197                | 0.0000116              | 2.557857271             | 3.4375E-07               | 2.22857E-07              | 0.00000119            | 2.416770467            |
| CIR4  | neg_413  | --              | --          |                                | 4.86433E-05               | 3.65693E-05               | 0.000205605            | 2.491170129             | 0.0000132                | 6.77143E-06              | 0.0000582             | 3.103487016            |
| CIR4  | pos_1451 | --              | --          |                                | 1.01619E-05               | 7.72045E-06               | 0.0000419              | 2.44019268              | 0.00000259               | 1.84571E-06              | 0.0000078             | 2.079294881            |
| CIR4  | pos_247  | C04555          | --          | Dehydroepiandrosterone sulfate | 2.32866E-06               | 1.7801E-06                | 0.00000946             | 2.409883141             | 2.20763E-07              | 1.95586E-07              | 0.000000397           | 1.021338009            |
| CIR4  | pos_4059 | --              | --          |                                | 4.2115E-06                | 3.22777E-06               | 0.000017               | 2.396925404             | 5.25875E-07              | 3.52429E-07              | 0.00000174            | 2.303684512            |
| CIR4  | pos_3062 | --              | --          |                                | 2.01101E-06               | 1.57032E-06               | 0.00000774             | 2.301279225             | 2.19375E-07              | 0.00000017               | 0.000000565           | 1.732716121            |
| CIR4  | pos_1922 | --              | --          |                                | 1.87864E-06               | 1.56315E-06               | 0.00000598             | 1.935685709             | 4.20706E-05              | 2.67629E-05              | 0.000149225           | 2.479185206            |
| CIR4  | pos_3618 | --              | --          |                                | 0.000022555               | 1.90977E-05               | 0.0000675              | 1.821489183             | 3.19465E-05              | 2.20656E-05              | 0.000101113           | 2.196099481            |
| CIR4  | neg_945  | C05466          | --          | Glycochenodeoxycholate         | 2.22429E-06               | 1.90154E-06               | 0.00000642             | 1.755406177             | 0.000007675              | 4.14286E-06              | 0.0000324             | 2.967295835            |
| CIR4  | pos_1844 | --              | --          |                                | 0.000005125               | 4.51923E-06               | 0.000013               | 1.52436249              | 0.000152466              | 9.67896E-05              | 0.000542199           | 2.485898721            |
| CIR4  | pos_329  | --              | --          |                                | 0.000011881               | 1.09565E-05               | 0.0000239              | 1.125228673             | 1.95538E-05              | 1.34329E-05              | 0.0000624             | 2.215779833            |

Supplementary Table 2. Differential expression genes and enrichment pathways of macrophages subpopulations of HCC and cirrhosis (related to Figure 3)

| a. M0       |             |           |           |                                                               |             |                                                                                                                                                                                                                                                                                                                                                                                       |       |
|-------------|-------------|-----------|-----------|---------------------------------------------------------------|-------------|---------------------------------------------------------------------------------------------------------------------------------------------------------------------------------------------------------------------------------------------------------------------------------------------------------------------------------------------------------------------------------------|-------|
| Gene symbol | avg_log2FC  | p_val_adj | regulated | Description                                                   | pvalue      | geneID                                                                                                                                                                                                                                                                                                                                                                                | Count |
| CTSW        | 1.11542818  | 0         | M0        | Ribosome                                                      | 5.46E-62    | FAU/RPSA/RPL10A/RPL3/RPL4/RPL5/RPL6/RPL7A/RPL8/RPL10/RPL11/RPL13/RPL17/RPL18/RPL18A/RPL19/RPL23A/RPL24/RPL26/RPL30/RPL28/RPL29/RPL32/RPL34/RPL35A/RPL36AL/RPL37/RPL39/RPL41/RPL36A/RPLP0/RPLP1/RPLP2/RPS2/RPS3/RPS3A/RPS4X/RPS4Y1/RPS5/RPS6/RPS7/RPS8/RPS10/RPS12/RPS13/RPS14/RPS15/RPS15A/RPS16/RPS18/RPS19/RPS21/RPS23/RPS24/RPS25/RPS26/RPS27/RPS27A/RPS28/RPS29/RPL14/MRPS6       | 62    |
| PRF1        | 0.992391387 | 0         | M0        | Coronavirus disease - COVID-19                                | 2.26E-51    | FAU/JAK1/RPSA/RPL10A/PIK3R1/RPL3/RPL4/RPL5/RPL6/RPL7A/RPL8/RPL10/RPL11/RPL13/RPL17/RPL18/RPL18A/RPL19/RPL23A/RPL24/RPL26/RPL30/RPL28/RPL29/RPL32/RPL34/RPL35A/RPL36AL/RPL37/RPL39/RPL41/RPL36A/RPLP0/RPLP1/RPLP2/RPS2/RPS3/RPS3A/RPS4X/RPS4Y1/RPS5/RPS6/RPS7/RPS8/RPS10/RPS12/RPS13/RPS14/RPS15/RPS15A/RPS16/RPS18/RPS19/RPS21/RPS23/RPS24/RPS25/RPS26/RPS27/RPS27A/RPS28/RPS29/RPL14 | 63    |
| LCK         | 0.541155198 | 0         | M0        | Natural killer cell mediated cytotoxicity                     | 1.52E-09    | CD247/CD48/FYN/GZMB/HLA-B/HLA-C/IFNG/KLRD1/LCK/SH2D1A/PIK3R1/PRF1/RAC2/ZAP70/HCST/KLRK1/LAT/NCR3                                                                                                                                                                                                                                                                                      | 18    |
| CD3E        | 0.818628773 | 4.14E-303 | M0        | T cell receptor signaling pathway                             | 1.41E-07    | CD3D/CD3E/CD3G/CD247/CD8A/CD8B/CTLA4/FYN/IFNG/LCK/PIK3R1/PTPRC/ZAP70/LAT                                                                                                                                                                                                                                                                                                              | 14    |
| TRBC2       | 1.168084505 | 3.67E-284 | M0        | Primary immunodeficiency                                      | 1.82E-07    | CD3D/CD3E/CD8A/CD8B/IL2RG/IL7R/LCK/PTPRC/ZAP70                                                                                                                                                                                                                                                                                                                                        | 9     |
| CST7        | 1.652801669 | 1.12E-269 | M0        | Th1 and Th2 cell differentiation                              | 2.24E-07    | RUNX3/CD3D/CD3E/CD3G/CD247/IFNG/IL2RB/IL2RG/JAK1/LCK/STAT4/ZAP70/LAT                                                                                                                                                                                                                                                                                                                  | 13    |
| CD247       | 0.728244053 | 5.51E-266 | M0        | Th17 cell differentiation                                     | 2.28E-07    | CD3D/CD3E/CD3G/CD247/HSP90AB1/IFNG/IL2RB/IL2RG/JAK1/LCK/RORA/TGFB1/ZAP70/LAT                                                                                                                                                                                                                                                                                                          | 14    |
| CD7         | 1.101954601 | 1.50E-256 | M0        | Antigen processing and presentation                           | 2.57E-07    | B2M/CD8A/CD8B/HLA-B/HLA-C/HLA-F/HSPA8/HSP90AB1/IFNG/KLRD1/PSME1/PSME2                                                                                                                                                                                                                                                                                                                 | 12    |
| GZMH        | 0.975527396 | 7.89E-253 | M0        | PD-L1 expression and PD-1 checkpoint pathway in cancer        | 7.52E-06    | CD3D/CD3E/CD3G/CD247/IFNG/JAK1/LCK/PIK3R1/ZAP70/BATF/LAT                                                                                                                                                                                                                                                                                                                              | 11    |
| S1PR5       | 0.328782818 | 2.75E-244 | M0        | Human immunodeficiency virus 1 infection                      | 4.21E-05    | B2M/CALM1/CD3D/CD3E/CD3G/CD247/CFL1/HLA-B/HLA-C/HLA-F/PIK3R1/RAC2/SKP1/CXCR4/GNG2/APOBEC3G                                                                                                                                                                                                                                                                                            | 16    |
| SKAP1       | 0.440364275 | 2.07E-242 | M0        | Graft-versus-host disease                                     | 5.15E-05    | GZMB/HLA-B/HLA-C/HLA-F/IFNG/KLRD1/PRF1                                                                                                                                                                                                                                                                                                                                                | 7     |
| GZMM        | 0.691965856 | 2.88E-231 | M0        | Type I diabetes mellitus                                      | 6.03E-05    | GZMB/HLA-B/HLA-C/HLA-F/HSPD1/IFNG/PRF1                                                                                                                                                                                                                                                                                                                                                | 7     |
| ZAP70       | 0.310202545 | 2.15E-229 | M0        | Human T-cell leukemia virus 1 infection                       | 7.35E-05    | B2M/CCND2/CCND3/CD3D/CD3E/CD3G/ETS1/HLA-B/HLA-C/HLA-F/IL2RB/IL2RG/JAK1/LCK/PIK3R1/TGFB1                                                                                                                                                                                                                                                                                               | 16    |
| PYHIN1      | 0.401531827 | 2.56E-225 | M0        | Hematopoietic cell lineage                                    | 0.00011397  | CD1C/CD2/CD3D/CD3E/CD3G/CD7/CD8A/CD8B/CD37/IL7R                                                                                                                                                                                                                                                                                                                                       | 10    |
| CD2         | 0.611382783 | 2.43E-212 | M0        | Cell adhesion molecules                                       | 0.000214542 | CD2/CD8A/CD8B/CTLA4/HLA-B/HLA-C/HLA-F/ICAM3/CD99/PTPRC/SPN/TIGIT                                                                                                                                                                                                                                                                                                                      | 12    |
| SYNE2       | 0.464282316 | 2.73E-208 | M0        | Allograft rejection                                           | 0.000245421 | GZMB/HLA-B/HLA-C/HLA-F/IFNG/PRF1                                                                                                                                                                                                                                                                                                                                                      | 6     |
| CD3G        | 0.421441945 | 5.22E-207 | M0        | Measles                                                       | 0.000457276 | CCND2/CCND3/CD3D/CD3E/CD3G/HSPA8/IL2RB/IL2RG/JAK1/PIK3R1/RACK1                                                                                                                                                                                                                                                                                                                        | 11    |
| TRBC1       | 1.022430122 | 7.30E-201 | M0        | Viral myocarditis                                             | 0.000513892 | ACTG1/FYN/HLA-B/HLA-C/HLA-F/PRF1/RAC2                                                                                                                                                                                                                                                                                                                                                 | 7     |
| TRAC        | 1.031342757 | 7.18E-197 | M0        | Epstein-Barr virus infection                                  | 0.001029885 | B2M/RUNX3/CCND2/CCND3/CD3D/CD3E/CD3G/CD247/HLA-B/HLA-C/HLA-F/JAK1/PIK3R1                                                                                                                                                                                                                                                                                                              | 13    |
| RORA        | 0.460438877 | 1.57E-193 | M0        | Autoimmune thyroid disease                                    | 0.00151886  | CTLA4/GZMB/HLA-B/HLA-C/HLA-F/PRF1                                                                                                                                                                                                                                                                                                                                                     | 6     |
| ACAP1       | 0.462507217 | 2.47E-185 | M0        | Chagas disease                                                | 0.002884196 | CD3D/CD3E/CD3G/CD247/IFNG/PIK3R1/CCL5/TGFB1                                                                                                                                                                                                                                                                                                                                           | 8     |
| KLRK1       | 0.369578816 | 2.91E-182 | M0        | Cellular senescence                                           | 0.003986129 | ZFP36L2/CALM1/CCND2/CCND3/ETS1/HLA-B/HLA-C/HLA-F/PIK3R1/TGFB1                                                                                                                                                                                                                                                                                                                         | 10    |
| SPOCK2      | 0.440016961 | 2.97E-180 | M0        | Yersinia infection                                            | 0.0052904   | ACTG1/ARF6/CD8A/CD8B/LCK/PIK3R1/RAC2/ZAP70/LAT                                                                                                                                                                                                                                                                                                                                        | 9     |
| GZMA        | 1.124965626 | 1.18E-171 | M0        | Leukocyte transendothelial migration                          | 0.005688395 | ACTG1/RHOH/CD99/PIK3R1/RAC2/EZR/CXCR4/MYL12A                                                                                                                                                                                                                                                                                                                                          | 8     |
| FYN         | 0.550675756 | 2.41E-171 | M0        | Cytokine-cytokine receptor interaction                        | 0.010596005 | CD27/IFNG/IL2RB/IL2RG/IL7R/LTB/CCL5/XCL1/XCL2/TGFB1/TNFRSF4/CXCR4/TNFRSF18/IL32                                                                                                                                                                                                                                                                                                       | 14    |
| KLRD1       | 0.639037868 | 1.71E-170 | M0        | JAK-STAT signaling pathway                                    | 0.015064562 | CCND2/CCND3/IFNG/IL2RB/IL2RG/IL7R/JAK1/PIK3R1/STAT4                                                                                                                                                                                                                                                                                                                                   | 12    |
| CD3D        | 0.860633257 | 1.32E-165 | M0        | Salmonella infection                                          | 0.015596999 | ACTG1/ARF6/RHOH/FLNA/GAPDH/HSP90AB1/PFN1/PTPRC/RPS3/SKP1/TUBA4A/MYL12A                                                                                                                                                                                                                                                                                                                | 9     |
| FGFBP2      | 0.808200478 | 9.81E-164 | M0        | Human cytomegalovirus infection                               | 0.018357275 | B2M/CALM1/HLA-B/HLA-C/HLA-F/JAK1/PIK3R1/RAC2/CCL5/CXCR4/GNG2                                                                                                                                                                                                                                                                                                                          | 11    |
| IL2RB       | 0.41918853  | 1.75E-162 | M0        | Inflammatory bowel disease                                    | 0.0188792   | IFNG/IL2RG/RORA/STAT4/TGFB1                                                                                                                                                                                                                                                                                                                                                           | 5     |
| IL32        | 1.81227871  | 1.18E-158 | M0        | Fc epsilon RI signaling pathway                               | 0.022514911 | ALOX5AP/FYN/PIK3R1/RAC2/LAT                                                                                                                                                                                                                                                                                                                                                           | 5     |
| TIGIT       | 0.461234433 | 1.67E-158 | M0        | Proteasome                                                    | 0.023272802 | IFNG/PSMB9/PSME1/PSME2                                                                                                                                                                                                                                                                                                                                                                | 4     |
| TENT5C      | 0.410309452 | 3.14E-154 | M0        | Fc gamma R-mediated phagocytosis                              | 0.027790349 | ARF6/CFL1/PIK3R1/PTPRC/RAC2/LAT                                                                                                                                                                                                                                                                                                                                                       | 6     |
| SLC38A1     | 0.345263813 | 2.49E-152 | M0        | Malaria                                                       | 0.030539988 | IFNG/KLRB1/TGFB1/KLRK1                                                                                                                                                                                                                                                                                                                                                                | 4     |
| HOPX        | 0.484181233 | 4.52E-151 | M0        | Viral protein interaction with cytokine and cytokine receptor | 0.031645764 | IL2RB/IL2RG/CCL5/XCL1/XCL2/CXCR4                                                                                                                                                                                                                                                                                                                                                      | 6     |
| NKG7        | 2.360814911 | 1.05E-149 | M0        | Osteoclast differentiation                                    | 0.032767129 | FYN/IFNG/JAK1/JUND/LCK/PIK3R1/TGFB1                                                                                                                                                                                                                                                                                                                                                   | 7     |
| NCR3        | 0.287203005 | 1.35E-146 | M0        | Kaposi sarcoma-associated herpesvirus infection               | 0.041765727 | CALM1/HLA-B/HLA-C/HLA-F/JAK1/PIK3R1/RPS27A/UBB/GNG2                                                                                                                                                                                                                                                                                                                                   | 9     |
| IL2RG       | 0.768375131 | 2.29E-145 | M0        | PI3K-Akt signaling pathway                                    | 0.042552901 | AREG/CCND2/CCND3/HSP90AB1/IL2RB/IL2RG/IL7R/JAK1/PIK3R1/PPP2R5C/RPS6/YWHAZ/GNG2/DDIT4                                                                                                                                                                                                                                                                                                  | 14    |
| SH2D2A      | 0.420350347 | 5.88E-143 | M0        | Pathogenic Escherichia coli infection                         | 0.045302647 | ACTG1/ARF6/FYN/GAPDH/NCL/RPS3/TUBA4A/EZR/SLC9A3R1                                                                                                                                                                                                                                                                                                                                     | 9     |
| TRGC2       | 0.388828641 | 8.60E-139 | M0        | Ras signaling pathway                                         | 0.049986664 | ARF6/CALM1/ETS1/PIK3R1/RAC2/REL/STK4/ZAP70/LAT/GNG2                                                                                                                                                                                                                                                                                                                                   | 10    |
| IFITM1      | 0.507157197 | 1.23E-135 | M0        |                                                               |             |                                                                                                                                                                                                                                                                                                                                                                                       |       |
| SYTL3       | 0.349129247 | 5.89E-133 | M0        |                                                               |             |                                                                                                                                                                                                                                                                                                                                                                                       |       |
| ETS1        | 0.424953761 | 7.68E-129 | M0        |                                                               |             |                                                                                                                                                                                                                                                                                                                                                                                       |       |
| GZMB        | 1.108354325 | 1.02E-128 | M0        |                                                               |             |                                                                                                                                                                                                                                                                                                                                                                                       |       |
| MYBL1       | 0.255796893 | 4.04E-127 | M0        |                                                               |             |                                                                                                                                                                                                                                                                                                                                                                                       |       |
| SPON2       | 0.591564452 | 1.95E-126 | M0        |                                                               |             |                                                                                                                                                                                                                                                                                                                                                                                       |       |
| KLRF1       | 0.382639964 | 1.71E-124 | M0        |                                                               |             |                                                                                                                                                                                                                                                                                                                                                                                       |       |
| LBH         | 0.38680712  | 4.19E-122 | M0        |                                                               |             |                                                                                                                                                                                                                                                                                                                                                                                       |       |
| TRDC        | 0.365140016 | 7.97E-121 | M0        |                                                               |             |                                                                                                                                                                                                                                                                                                                                                                                       |       |
| BCL11B      | 0.324824842 | 1.76E-120 | M0        |                                                               |             |                                                                                                                                                                                                                                                                                                                                                                                       |       |
| LAIR2       | 0.396180118 | 7.92E-119 | M0        |                                                               |             |                                                                                                                                                                                                                                                                                                                                                                                       |       |
| SH2D1A      | 0.260367861 | 9.63E-119 | M0        |                                                               |             |                                                                                                                                                                                                                                                                                                                                                                                       |       |
| CD69        | 0.715343429 | 2.51E-111 | M0        |                                                               |             |                                                                                                                                                                                                                                                                                                                                                                                       |       |
| CLIC3       | 0.40277092  | 1.21E-110 | M0        |                                                               |             |                                                                                                                                                                                                                                                                                                                                                                                       |       |

|          |             |           |    |
|----------|-------------|-----------|----|
| RPS3     | 0.752071956 | 3.40E-108 | M0 |
| GNLY     | 2.281121116 | 9.46E-105 | M0 |
| CCL5     | 1.508617688 | 5.16E-101 | M0 |
| PDE4D    | 0.253993223 | 1.37E-100 | M0 |
| RUNX3    | 0.635812663 | 2.02E-99  | M0 |
| MYOM2    | 0.300927795 | 7.12E-99  | M0 |
| CD8A     | 0.369521396 | 3.94E-97  | M0 |
| SEPTIN1  | 0.335146295 | 3.17E-96  | M0 |
| RAC2     | 0.692358477 | 5.23E-96  | M0 |
| PTPN7    | 0.456007933 | 3.79E-95  | M0 |
| KLRB1    | 0.742661962 | 1.17E-93  | M0 |
| CORO1A   | 0.702939464 | 6.97E-89  | M0 |
| CD27     | 0.333600785 | 1.27E-87  | M0 |
| PRKCH    | 0.305893668 | 1.28E-87  | M0 |
| RPS15A   | 0.611533455 | 1.58E-87  | M0 |
| STAT4    | 0.269450924 | 5.36E-87  | M0 |
| RHOH     | 0.33666151  | 5.40E-80  | M0 |
| BTG1     | 0.732405913 | 5.74E-76  | M0 |
| RPL30    | 0.547941935 | 2.10E-74  | M0 |
| CYTIP    | 0.518351902 | 8.60E-74  | M0 |
| CD8B     | 0.297136151 | 1.04E-72  | M0 |
| RPS27A   | 0.534805891 | 2.20E-70  | M0 |
| CRIP1    | 0.556136684 | 5.16E-70  | M0 |
| CCND2    | 0.369147651 | 7.68E-68  | M0 |
| OPTN     | 0.304426136 | 1.19E-67  | M0 |
| RPL6     | 0.531279524 | 4.42E-67  | M0 |
| LAT      | 0.272816051 | 4.01E-66  | M0 |
| HIST1H4C | 0.570594755 | 7.22E-64  | M0 |
| ITM2A    | 0.39090304  | 7.38E-64  | M0 |
| ENC1     | 0.268098989 | 3.70E-62  | M0 |
| TUBA4A   | 0.464175574 | 5.11E-61  | M0 |
| ICAM3    | 0.314642251 | 1.02E-60  | M0 |
| ABHD17A  | 0.515193821 | 1.25E-59  | M0 |
| XCL2     | 1.155246538 | 2.48E-59  | M0 |
| RPSA     | 0.568191576 | 8.59E-59  | M0 |
| RPS7     | 0.497813132 | 3.42E-57  | M0 |
| LIMD2    | 0.469277826 | 1.03E-56  | M0 |
| RPS4X    | 0.5735972   | 9.05E-56  | M0 |
| JUND     | 0.621495048 | 4.50E-55  | M0 |
| S100A4   | 0.653735208 | 8.03E-55  | M0 |
| AKNA     | 0.409434822 | 8.59E-55  | M0 |
| CTLA4    | 0.255126515 | 1.78E-54  | M0 |
| RPL18    | 0.460942233 | 2.59E-54  | M0 |
| RPS27    | 0.505996396 | 1.43E-53  | M0 |
| C12orf75 | 0.255889869 | 2.29E-53  | M0 |
| RPS12    | 0.448313037 | 4.74E-53  | M0 |
| RAB27A   | 0.252418835 | 1.15E-52  | M0 |
| IFITM2   | 0.620628569 | 1.19E-52  | M0 |
| RPL5     | 0.56705761  | 4.09E-52  | M0 |
| RPL14    | 0.458475726 | 4.23E-52  | M0 |
| RPL28    | 0.422099601 | 4.55E-52  | M0 |
| ISG20    | 0.550186877 | 5.65E-52  | M0 |
| RPL34    | 0.448973562 | 3.17E-51  | M0 |
| CALM1    | 0.520971724 | 5.12E-51  | M0 |
| RPL11    | 0.431345171 | 1.00E-50  | M0 |
| IRF1     | 0.530157686 | 1.52E-50  | M0 |
| C12orf57 | 0.485788108 | 1.84E-50  | M0 |
| STK17A   | 0.322379171 | 4.27E-50  | M0 |
| EEF1D    | 0.483088892 | 5.60E-50  | M0 |
| RPL24    | 0.421076509 | 3.17E-49  | M0 |
| TLE5     | 0.542295702 | 3.37E-49  | M0 |
| CNOT6L   | 0.385082351 | 6.73E-49  | M0 |
| ZFP36L2  | 0.786453167 | 1.25E-48  | M0 |
| RPL10    | 0.422593829 | 1.44E-48  | M0 |

|            |             |          |    |
|------------|-------------|----------|----|
| PFN1       | 0.497531678 | 4.94E-48 | M0 |
| PLAC8      | 0.359962454 | 4.98E-48 | M0 |
| PCED1B-AS1 | 0.448959856 | 2.00E-47 | M0 |
| RPLP1      | 0.374137532 | 2.77E-47 | M0 |
| RPL7A      | 0.444162578 | 2.82E-47 | M0 |
| IL7R       | 0.696007202 | 5.96E-47 | M0 |
| RPL39      | 0.413530671 | 1.97E-46 | M0 |
| PLAAT4     | 0.556057481 | 5.50E-46 | M0 |
| RPL41      | 0.409875275 | 6.15E-46 | M0 |
| MYL12A     | 0.514928687 | 1.33E-45 | M0 |
| LTB        | 0.689343328 | 6.02E-45 | M0 |
| DUSP2      | 0.757066342 | 6.95E-45 | M0 |
| RPL32      | 0.392682657 | 3.00E-44 | M0 |
| FAU        | 0.367845378 | 4.19E-43 | M0 |
| RPS21      | 0.405585674 | 1.09E-41 | M0 |
| SPN        | 0.26437703  | 1.98E-41 | M0 |
| ALOX5AP    | 0.3969526   | 3.32E-41 | M0 |
| RPL35A     | 0.412946257 | 3.98E-40 | M0 |
| RPS10      | 0.428793958 | 4.73E-40 | M0 |
| RPS15      | 0.382561602 | 7.15E-40 | M0 |
| RPS8       | 0.412401218 | 8.65E-40 | M0 |
| DUSP4      | 0.433297164 | 2.67E-39 | M0 |
| STK17B     | 0.358412542 | 4.20E-39 | M0 |
| SLC9A3R1   | 0.271491567 | 1.26E-38 | M0 |
| TNFRSF18   | 0.36026968  | 1.95E-38 | M0 |
| PSMB9      | 0.444058332 | 4.86E-38 | M0 |
| CLEC2D     | 0.264801137 | 1.04E-37 | M0 |
| PPP2R5C    | 0.419768851 | 1.12E-37 | M0 |
| STK4       | 0.472694505 | 2.55E-37 | M0 |
| PTPRC      | 0.475000596 | 3.18E-37 | M0 |
| DDX24      | 0.446040598 | 1.36E-36 | M0 |
| H3F3B      | 0.424315611 | 1.68E-36 | M0 |
| RPLP2      | 0.346236142 | 1.35E-35 | M0 |
| RPL19      | 0.362260666 | 2.00E-35 | M0 |
| RPS26      | 0.600759148 | 2.62E-33 | M0 |
| EEF1A1     | 0.39488672  | 8.10E-33 | M0 |
| LIME1      | 0.305224796 | 9.55E-33 | M0 |
| CD1C       | 0.319917291 | 9.35E-32 | M0 |
| PTMA       | 0.311390494 | 2.04E-31 | M0 |
| RNF19A     | 0.336603947 | 2.71E-31 | M0 |
| JAK1       | 0.390739054 | 3.07E-31 | M0 |
| HLA-B      | 0.325169372 | 3.36E-31 | M0 |
| RPL37      | 0.321839505 | 4.24E-31 | M0 |
| DDIT4      | 0.459874188 | 6.28E-31 | M0 |
| BATF       | 0.303955013 | 7.71E-31 | M0 |
| RPL4       | 0.399085501 | 1.45E-30 | M0 |
| VPS37B     | 0.45224277  | 3.69E-30 | M0 |
| TERF2IP    | 0.32313082  | 5.53E-30 | M0 |
| CCND3      | 0.254563179 | 5.32E-29 | M0 |
| RPS24      | 0.307181239 | 6.00E-29 | M0 |
| ANXA6      | 0.255933382 | 6.57E-29 | M0 |
| S100A6     | 0.334979534 | 2.15E-28 | M0 |
| TMA7       | 0.360236022 | 2.16E-28 | M0 |
| TAGLN2     | 0.417876716 | 3.36E-28 | M0 |
| DUSP5      | 0.363787639 | 6.28E-28 | M0 |
| EEF1B2     | 0.390816615 | 6.36E-28 | M0 |
| CD52       | 0.437741084 | 2.29E-27 | M0 |
| NSD3       | 0.324463231 | 6.77E-27 | M0 |
| RPL8       | 0.320718957 | 1.33E-26 | M0 |
| RPL13      | 0.33539024  | 1.40E-26 | M0 |
| PDE7A      | 0.258660179 | 4.65E-26 | M0 |
| VAMP2      | 0.325232942 | 4.92E-26 | M0 |
| CFL1       | 0.30842055  | 1.47E-25 | M0 |
| RPL10A     | 0.420833424 | 1.90E-25 | M0 |

|           |             |          |    |
|-----------|-------------|----------|----|
| RPS3A     | 0.393657834 | 2.00E-25 | M0 |
| SEPTIN7   | 0.336616937 | 2.04E-25 | M0 |
| APOBEC3G  | 0.250203411 | 2.73E-25 | M0 |
| RPS28     | 0.296026787 | 3.20E-25 | M0 |
| PSME1     | 0.354714393 | 3.20E-25 | M0 |
| CEMIP2    | 0.406481252 | 4.61E-25 | M0 |
| RPS25     | 0.331731627 | 9.91E-25 | M0 |
| IFNG      | 0.781102347 | 1.20E-24 | M0 |
| B2M       | 0.272734614 | 6.38E-24 | M0 |
| KMT2E     | 0.361349616 | 6.58E-24 | M0 |
| HLA-C     | 0.334972899 | 7.13E-24 | M0 |
| AREG      | 0.636195202 | 1.44E-23 | M0 |
| RPL29     | 0.334494892 | 2.18E-23 | M0 |
| UBB       | 0.332528187 | 3.11E-23 | M0 |
| RPS2      | 0.341773932 | 3.45E-23 | M0 |
| ARHGDIB   | 0.360325154 | 3.70E-23 | M0 |
| HLA-F     | 0.325400161 | 1.07E-22 | M0 |
| RPL3      | 0.40488093  | 2.11E-22 | M0 |
| HNRNPA2B1 | 0.343322415 | 2.80E-22 | M0 |
| SLC2A3    | 0.35769427  | 3.67E-22 | M0 |
| ACTG1     | 0.342322758 | 6.10E-22 | M0 |
| CIB1      | 0.308489985 | 1.67E-21 | M0 |
| H2AFZ     | 0.358283504 | 2.68E-21 | M0 |
| LSP1      | 0.290907051 | 3.60E-21 | M0 |
| SARAF     | 0.361252419 | 5.07E-21 | M0 |
| EVL       | 0.342170808 | 7.95E-21 | M0 |
| RPS13     | 0.28580806  | 1.24E-20 | M0 |
| RBM8A     | 0.324938569 | 1.45E-20 | M0 |
| TSC22D3   | 0.459140791 | 1.83E-20 | M0 |
| TSPYL2    | 0.318092538 | 3.13E-20 | M0 |
| UBALD2    | 0.258045659 | 3.23E-20 | M0 |
| FMNL1     | 0.301137487 | 4.29E-20 | M0 |
| YPEL3     | 0.297249144 | 1.38E-19 | M0 |
| RSBN1L    | 0.253905925 | 2.13E-19 | M0 |
| PNISR     | 0.312294945 | 2.87E-19 | M0 |
| RPL23A    | 0.324376278 | 2.89E-19 | M0 |
| GNG2      | 0.314971845 | 3.67E-19 | M0 |
| RPL36AL   | 0.297418622 | 3.69E-19 | M0 |
| CDC42SE2  | 0.280927572 | 5.08E-19 | M0 |
| SUB1      | 0.318078646 | 1.01E-18 | M0 |
| FLNA      | 0.33754393  | 1.36E-18 | M0 |
| SLA       | 0.353598766 | 2.85E-18 | M0 |
| YWHAZ     | 0.32934367  | 4.69E-18 | M0 |
| RPS29     | 0.345754431 | 1.13E-17 | M0 |
| SMCHD1    | 0.270684741 | 1.40E-17 | M0 |
| LDHB      | 0.337660847 | 2.12E-17 | M0 |
| RPL36A    | 0.269538471 | 2.41E-17 | M0 |
| HSPA8     | 0.386470947 | 4.32E-17 | M0 |
| CREM      | 0.441623576 | 4.77E-17 | M0 |
| HMGB1     | 0.294050891 | 4.93E-17 | M0 |
| GIMAP7    | 0.265509431 | 8.82E-17 | M0 |
| TRIR      | 0.293429596 | 9.18E-17 | M0 |
| HCST      | 0.355724654 | 1.06E-16 | M0 |
| GZMK      | 0.557345949 | 1.54E-16 | M0 |
| RPS5      | 0.345732866 | 2.14E-16 | M0 |
| ARF6      | 0.291103539 | 2.38E-16 | M0 |
| RPS19     | 0.329643055 | 3.00E-16 | M0 |
| CD37      | 0.282572481 | 8.20E-16 | M0 |
| RPS14     | 0.28464598  | 8.51E-16 | M0 |
| HMGB2     | 0.291986693 | 1.19E-15 | M0 |
| RBM39     | 0.302605165 | 3.14E-15 | M0 |
| NACA      | 0.278174097 | 4.03E-15 | M0 |
| RPL18A    | 0.299564451 | 4.44E-15 | M0 |
| NCL       | 0.318384504 | 1.95E-14 | M0 |

|           |             |             |    |
|-----------|-------------|-------------|----|
| RPS23     | 0.297609724 | 4.03E-14    | MO |
| TGFB1     | 0.331954662 | 4.14E-14    | MO |
| RPS18     | 0.37144039  | 5.68E-14    | MO |
| TNFRSF4   | 0.362285567 | 1.90E-13    | MO |
| CD48      | 0.286879252 | 2.01E-13    | MO |
| BRD2      | 0.27955171  | 3.40E-13    | MO |
| LINC-PINT | 0.3272674   | 3.85E-13    | MO |
| MALAT1    | 0.334743271 | 6.10E-13    | MO |
| SNRPD2    | 0.280546839 | 6.18E-13    | MO |
| RPS16     | 0.258937035 | 9.32E-13    | MO |
| RPL17     | 0.277832093 | 1.15E-12    | MO |
| RACK1     | 0.279895987 | 1.28E-12    | MO |
| PIK3R1    | 0.319281378 | 1.73E-12    | MO |
| ARL4C     | 0.309799639 | 2.46E-12    | MO |
| SRSF7     | 0.337578132 | 4.66E-12    | MO |
| RPLP0     | 0.277917148 | 5.09E-12    | MO |
| RPS4Y1    | 0.323873301 | 8.61E-12    | MO |
| SKP1      | 0.272257442 | 3.87E-11    | MO |
| CXCR4     | 0.407332953 | 5.05E-11    | MO |
| PSME2     | 0.287783382 | 5.81E-11    | MO |
| CD99      | 0.253463322 | 1.12E-10    | MO |
| REL       | 0.332483631 | 1.34E-10    | MO |
| EZR       | 0.335465019 | 1.55E-10    | MO |
| RPL26     | 0.279532997 | 4.85E-10    | MO |
| RPS6      | 0.272155388 | 1.11E-09    | MO |
| SSR2      | 0.253466681 | 1.34E-09    | MO |
| ADGRE5    | 0.280853552 | 8.13E-09    | MO |
| METRNL    | 0.330836048 | 1.03E-08    | MO |
| MRPS6     | 0.258996165 | 1.23E-08    | MO |
| LEPROTL1  | 0.264432743 | 1.67E-08    | MO |
| CACYBP    | 0.348490421 | 5.22E-08    | MO |
| NPM1      | 0.270189308 | 1.07E-07    | MO |
| RSRP1     | 0.264229082 | 6.47E-07    | MO |
| RGCC      | 0.25242679  | 1.24E-06    | MO |
| ELF1      | 0.272288919 | 1.80E-06    | MO |
| HSP90AB1  | 0.26409967  | 3.92E-06    | MO |
| GAPDH     | 0.264190577 | 4.54E-06    | MO |
| HSPD1     | 0.375175    | 4.94E-06    | MO |
| XCL1      | 0.374733104 | 0.000203073 | MO |

#### b. M1\_TAM

| Gene symbol | avg_log2FC  | p_val_adj | regulated | gr | Description                                                   | pvalue      | geneID                                                                 | Count |
|-------------|-------------|-----------|-----------|----|---------------------------------------------------------------|-------------|------------------------------------------------------------------------|-------|
| RPS26       | 0.737618126 | 0         | M1_TAM    |    | Coronavirus disease - COVID-19                                | 3.97E-07    | C3/IL1B/RPL4/RPL31/RPL34/RPL36A/RPLP2/RPS3A/RPS8/RPS24/RPS26/NLRP3     | 12    |
| PFN1        | 0.674831918 | 0         | M1_TAM    |    | Salmonella infection                                          | 8.48E-07    | ACTB/BIRC3/RHOA/GAPDH/IL1B/PFN1/MAP2K3/RAC1/S100A10/ARPC2/TUBA1B/NLRP3 | 12    |
| RPS8        | 0.457698755 | 0         | M1_TAM    |    | Lipid and atherosclerosis                                     | 1.43E-06    | RHOA/CXCL1/CXCL3/IL1B/LYN/POU2F2/MAP2K3/RAC1/CCL3/CCL3L1/NLRP3         | 11    |
| EEF1A1      | 0.383467984 | 0         | M1_TAM    |    | NF-kappa B signaling pathway                                  | 2.18E-06    | BIRC3/BCL2A1/CXCL1/CXCL3/IL1B/LYN/CCL4/CCL4L2                          | 8     |
| CHI3L1      | 0.462346412 | 5.34E-246 | M1_TAM    |    | Toll-like receptor signaling pathway                          | 2.18E-06    | IL1B/MAP2K3/RAC1/CCL3L1/CCL4/SPP1/CCL4L2                               | 8     |
| RPLP2       | 0.374670716 | 1.20E-244 | M1_TAM    |    | Pertussis                                                     | 2.93E-06    | RHOA/C3/CFL1/GNAI2/IL1A/IL1B/NLRP3                                     | 7     |
| ACTB        | 0.584439097 | 2.65E-223 | M1_TAM    |    | Chemokine signaling pathway                                   | 3.85E-06    | RHOA/GNAI2/CXCL1/CXCL3/LYN/RAC1/CCL3/CCL3L1/CCL4/CCL4L2                | 10    |
| CCNI        | 0.398620413 | 2.06E-203 | M1_TAM    |    | Ribosome                                                      | 5.92E-06    | RPL4/RPL31/RPL34/RPL36A/RPLP2/RPS3A/RPS8/RPS24/RPS26                   | 9     |
| CRP         | 0.657352771 | 2.11E-202 | M1_TAM    |    | Glycolysis / Gluconeogenesis                                  | 1.85E-05    | ENO1/GAPDH/LDHA/PGK1/PKM/TP1                                           | 6     |
| S100A6      | 0.938877324 | 4.12E-195 | M1_TAM    |    | Legionellosis                                                 | 0.000106508 | C3/EEF1A1/CXCL1/CXCL3/IL1B                                             | 5     |
| PABPC1      | 0.393176067 | 1.81E-185 | M1_TAM    |    | Rheumatoid arthritis                                          | 0.000119197 | CXCL1/CXCL3/IL1A/IL1B/CCL3/CCL3L1                                      | 6     |
| TPT1        | 0.285777133 | 3.73E-176 | M1_TAM    |    | Yersinia infection                                            | 0.000137992 | ACTB/RHOA/IL1B/MAP2K3/RAC1/ARPC2/NLRP3                                 | 7     |
| PPIA        | 0.317282228 | 3.32E-163 | M1_TAM    |    | Viral protein interaction with cytokine and cytokine receptor | 0.000178051 | CXCL1/CXCL3/CCL3/CCL3L1/CCL4/CCL4L2                                    | 6     |
| RAC1        | 0.358537409 | 4.25E-159 | M1_TAM    |    | Pathogenic Escherichia coli infection                         | 0.000222363 | ACTB/RHOA/GAPDH/IL1B/RAC1/ARPC2/TUBA1B/NLRP3                           | 8     |
| GABARAP     | 0.333607662 | 4.78E-158 | M1_TAM    |    | HIF-1 signaling pathway                                       | 0.000285152 | EIF4E/ENO1/GAPDH/LDHA/PGK1/TIMP1                                       | 6     |
| RHOA        | 0.338086518 | 4.28E-153 | M1_TAM    |    | Biosynthesis of amino acids                                   | 0.000390832 | ENO1/GAPDH/PGK1/PKM/TP1                                                | 5     |
| RPL4        | 0.33662242  | 3.08E-142 | M1_TAM    |    | Human cytomegalovirus infection                               | 0.000544668 | RHOA/GNAI2/IL1B/RAC1/CCL3/CCL3L1/CCL4/CCL4L2                           | 8     |
| CFL1        | 0.323963934 | 2.23E-135 | M1_TAM    |    | NOD-like receptor signaling pathway                           | 0.000830537 | BIRC3/RHOA/CXCL1/CXCL3/IL1B/GABARAP/NLRP3                              | 7     |
| S100A4      | 0.919787494 | 2.27E-131 | M1_TAM    |    | Shigellosis                                                   | 0.001004372 | ACTB/RHOA/C3/IL1B/PFN1/RAC1/ARPC2/NLRP3                                | 8     |
| RPL36A      | 0.323073571 | 9.32E-130 | M1_TAM    |    | Fc gamma R-mediated phagocytosis                              | 0.001266385 | CFL1/LYN/RAC1/ASP/ARPC2                                                | 5     |
| COTL1       | 0.735897135 | 3.31E-128 | M1_TAM    |    | Viral carcinogenesis                                          | 0.001516228 | RHOA/C3/LYN/PKM/PMAIP1/RAC1/YWHAH                                      | 7     |
| FXYD5       | 0.388879372 | 2.64E-127 | M1_TAM    |    | Chagas disease                                                | 0.001584869 | C3/GNAI2/IL1B/CCL3/CCL3L1                                              | 5     |
| RPS3A       | 0.299174439 | 1.45E-124 | M1_TAM    |    | Rap1 signaling pathway                                        | 0.001790707 | ACTB/RHOA/GNAI2/PFN1/MAP2K3/RAC1/VASP                                  | 7     |

|          |             |           |        |                                                            |             |                                               |   |
|----------|-------------|-----------|--------|------------------------------------------------------------|-------------|-----------------------------------------------|---|
| PLAUR    | 0.616240539 | 2.16E-117 | M1_TAM | Necroptosis                                                | 0.002071367 | BIRC3/HMGB1/IL1A/IL1B/PPIA/NLRP3              | 6 |
| RPL34    | 0.308505976 | 1.26E-115 | M1_TAM | TNF signaling pathway                                      | 0.002393663 | BIRC3/CXCL1/CXCL3/IL1B/MAP2K3                 | 5 |
| HTRA1    | 0.336684364 | 2.20E-114 | M1_TAM | Fc epsilon RI signaling pathway                            | 0.002456813 | ALOX5AP/LYN/MAP2K3/RAC1                       | 4 |
| S100A11  | 0.45360936  | 2.08E-109 | M1_TAM | Leukocyte transendothelial migration                       | 0.002585912 | ACTB/RHOA/GNAI2/RAC1/VASP                     | 5 |
| RPL31    | 0.29201131  | 1.86E-108 | M1_TAM | Carbon metabolism                                          | 0.002686137 | ENO1/GAPDH/PGK1/PKM/TP11                      | 5 |
| ARPC2    | 0.290540905 | 3.73E-108 | M1_TAM | Epithelial cell signaling in Helicobacter pylori infection | 0.00273164  | CXCL1/CXCL3/LYN/RAC1                          | 4 |
| SLC11A1  | 0.255358478 | 6.42E-107 | M1_TAM | Tight junction                                             | 0.002814056 | ACTB/RHOA/RAC1/VASP/ARPC2/TUBA1B              | 6 |
| GAPDH    | 0.697473149 | 8.15E-106 | M1_TAM | Cytokine-cytokine receptor interaction                     | 0.003083525 | CXCL1/CXCL3/IL1A/IL1B/CCL3/CCL3L1/CCL4/CCL4L2 | 8 |
| EEF2     | 0.281935771 | 2.03E-105 | M1_TAM | Platelet activation                                        | 0.003719279 | ACTB/RHOA/GNAI2/LYN/VASP                      | 5 |
| GNAI2    | 0.270528726 | 1.44E-103 | M1_TAM | Tuberculosis                                               | 0.003845046 | RHOA/C3/IL1A/IL1B/LSP1/CORO1A                 | 6 |
| RPS24    | 0.266083771 | 7.06E-103 | M1_TAM | Bacterial invasion of epithelial cells                     | 0.003858982 | ACTB/RHOA/RAC1/ARPC2                          | 4 |
| TPM3     | 0.28201965  | 2.22E-100 | M1_TAM | Leishmaniasis                                              | 0.003858982 | C3/EEF1A1/IL1A/IL1B                           | 4 |
| AIF1     | 0.329568874 | 5.77E-94  | M1_TAM | Apoptosis                                                  | 0.005505352 | ACTB/BIRC3/BCL2A1/PMAIP1/TUBA1B               | 5 |
| SPH1     | 0.317986668 | 3.21E-93  | M1_TAM | Fluid shear stress and atherosclerosis                     | 0.006032833 | ACTB/RHOA/IL1A/IL1B/RAC1                      | 5 |
| NLRP3    | 0.402176634 | 6.99E-93  | M1_TAM | Focal adhesion                                             | 0.006559926 | ACTB/BIRC3/RHOA/RAC1/SPP1/VASP                | 6 |
| SERPINA1 | 0.464700105 | 9.30E-93  | M1_TAM | Alcoholic liver disease                                    | 0.006595064 | C3/CXCL1/CXCL3/IL1B/MAP2K3                    | 5 |
| CORO1A   | 0.365943773 | 1.92E-89  | M1_TAM | Phagosome                                                  | 0.008734905 | ACTB/C3/RAC1/TUBA1B/CORO1A                    | 5 |
| ZFP36L1  | 0.396926346 | 5.55E-89  | M1_TAM | Regulation of actin cytoskeleton                           | 0.009616642 | ACTB/RHOA/CFL1/PFN1/RAC1/ARPC2                | 6 |
| CD93     | 0.269211801 | 3.92E-84  | M1_TAM | C-type lectin receptor signaling pathway                   | 0.011080797 | RHOA/IL1B/LSP1/NLRP3                          | 4 |
| S100A10  | 0.658026485 | 3.54E-79  | M1_TAM | Cytosolic DNA-sensing pathway                              | 0.015632504 | IL1B/CCL4/CCL4L2                              | 3 |
| TIMP1    | 0.386553134 | 2.10E-78  | M1_TAM | Adherens junction                                          | 0.021461557 | ACTB/RHOA/RAC1                                | 3 |
| NINJ1    | 0.383457799 | 1.20E-77  | M1_TAM | Osteoclast differentiation                                 | 0.022154235 | IL1A/IL1B/RAC1/SP1                            | 4 |
| CAPZB    | 0.290986314 | 5.83E-77  | M1_TAM | Kaposi sarcoma-associated herpesvirus infection            | 0.022964111 | C3/CXCL1/CXCL3/LYN/RAC1                       | 5 |
| FCGBP    | 0.467269159 | 1.11E-71  | M1_TAM | RNA degradation                                            | 0.028328066 | BTG1/ENO1/PABPC1                              | 3 |
| TPI1     | 0.39052615  | 7.22E-71  | M1_TAM | Apoptosis - multiple species                               | 0.029208072 | BIRC3/PMAIP1                                  | 2 |
| C3       | 0.570334476 | 4.16E-68  | M1_TAM | Complement and coagulation cascades                        | 0.034157182 | C3/SERPINA1/PLAUR                             | 3 |
| VASP     | 0.253138985 | 6.20E-66  | M1_TAM | Colorectal cancer                                          | 0.035184868 | RHOA/PMAIP1/RAC1                              | 3 |
| ATP5MC2  | 0.259691599 | 4.32E-65  | M1_TAM | Oxytocin signaling pathway                                 | 0.039865753 | ACTB/RHOA/EEF2/GNAI2                          | 4 |
| POU2F2   | 0.311899098 | 1.15E-64  | M1_TAM | IL-17 signaling pathway                                    | 0.043976526 | CXCL1/CXCL3/IL1B                              | 3 |
| IL1B     | 1.55196524  | 1.72E-64  | M1_TAM | Graft-versus-host disease                                  | 0.048072493 | IL1A/IL1B                                     | 2 |
| LUCAT1   | 0.333854947 | 4.72E-63  | M1_TAM | Hematopoietic cell lineage                                 | 0.049977704 | CD37/IL1A/IL1B                                | 3 |
| PTGDS    | 0.299100695 | 2.96E-62  | M1_TAM |                                                            |             |                                               |   |
| HMGB1    | 0.251824056 | 2.74E-60  | M1_TAM |                                                            |             |                                               |   |
| MAP2K3   | 0.286955756 | 2.74E-59  | M1_TAM |                                                            |             |                                               |   |
| PDE4B    | 0.267052818 | 5.70E-59  | M1_TAM |                                                            |             |                                               |   |
| IL1A     | 0.290547024 | 1.91E-55  | M1_TAM |                                                            |             |                                               |   |
| SMIM25   | 0.387548737 | 3.00E-52  | M1_TAM |                                                            |             |                                               |   |
| NAP1L1   | 0.333752744 | 3.08E-50  | M1_TAM |                                                            |             |                                               |   |
| STXBP2   | 0.385312715 | 1.67E-49  | M1_TAM |                                                            |             |                                               |   |
| ALOX5AP  | 0.429718258 | 4.08E-48  | M1_TAM |                                                            |             |                                               |   |
| PTP4A2   | 0.317244414 | 1.18E-47  | M1_TAM |                                                            |             |                                               |   |
| BCL2A1   | 0.821896459 | 1.26E-46  | M1_TAM |                                                            |             |                                               |   |
| LSP1     | 0.263032066 | 3.23E-39  | M1_TAM |                                                            |             |                                               |   |
| YWHAH    | 0.386191582 | 2.03E-38  | M1_TAM |                                                            |             |                                               |   |
| NFKBIZ   | 0.434781302 | 2.12E-38  | M1_TAM |                                                            |             |                                               |   |
| LYN      | 0.293309286 | 4.50E-37  | M1_TAM |                                                            |             |                                               |   |
| LRRFIP1  | 0.254226997 | 4.52E-37  | M1_TAM |                                                            |             |                                               |   |
| CCL4L2   | 0.580806914 | 4.33E-34  | M1_TAM |                                                            |             |                                               |   |
| MIF      | 0.600549646 | 5.74E-34  | M1_TAM |                                                            |             |                                               |   |
| PMAIP1   | 0.290339949 | 2.19E-32  | M1_TAM |                                                            |             |                                               |   |
| PKM      | 0.292830823 | 3.98E-32  | M1_TAM |                                                            |             |                                               |   |
| CXCL3    | 0.506429373 | 1.65E-29  | M1_TAM |                                                            |             |                                               |   |
| GOS2     | 0.686166632 | 1.28E-28  | M1_TAM |                                                            |             |                                               |   |
| SPP1     | 1.690337828 | 1.09E-25  | M1_TAM |                                                            |             |                                               |   |
| CCL4     | 0.496588851 | 1.52E-24  | M1_TAM |                                                            |             |                                               |   |
| CCL3     | 0.701819204 | 3.28E-24  | M1_TAM |                                                            |             |                                               |   |
| NEAT1    | 0.346659014 | 4.26E-24  | M1_TAM |                                                            |             |                                               |   |
| CCL3L1   | 0.656917075 | 1.23E-23  | M1_TAM |                                                            |             |                                               |   |
| LDHA     | 0.42661825  | 2.02E-23  | M1_TAM |                                                            |             |                                               |   |
| CD37     | 0.252924497 | 1.68E-16  | M1_TAM |                                                            |             |                                               |   |
| FCN1     | 0.491108921 | 1.94E-15  | M1_TAM |                                                            |             |                                               |   |
| LGALS1   | 0.457712411 | 4.51E-15  | M1_TAM |                                                            |             |                                               |   |
| BTG1     | 0.254553103 | 3.57E-13  | M1_TAM |                                                            |             |                                               |   |
| EIF4E    | 0.270379634 | 5.22E-13  | M1_TAM |                                                            |             |                                               |   |



|         |             |             |        |
|---------|-------------|-------------|--------|
| IFITM2  | 0.436441336 | 5.64E-13    | M1_TAM |
| ENO1    | 0.2676715   | 6.79E-13    | M1_TAM |
| PGK1    | 0.279286274 | 1.59E-12    | M1_TAM |
| PLEK    | 0.294139671 | 2.04E-08    | M1_TAM |
| TNFAIP2 | 0.28288518  | 3.57E-08    | M1_TAM |
| BIRC3   | 0.388633904 | 3.73E-08    | M1_TAM |
| RNASE1  | 0.615304935 | 4.08E-07    | M1_TAM |
| TUBA1B  | 0.257175319 | 1.58E-06    | M1_TAM |
| CXCL1   | 0.434693857 | 0.006483147 | M1_TAM |

**c. M2\_TAM**

| Gene symbol | avg_log2FC  | p_val_adj | regulated | gr | Description                                       | pvalue   | geneID                                                                                                                                                                         | Count |
|-------------|-------------|-----------|-----------|----|---------------------------------------------------|----------|--------------------------------------------------------------------------------------------------------------------------------------------------------------------------------|-------|
| APOC3       | 2.685739585 | 0         | M2_TAM    |    | Lysosome                                          | 9.57E-19 | ACP5/ASAH1/ATP6AP1/CD63/CD68/CTSC/TPP1/CTSB/CTSD/CTSH/CTSL/CTSS/CTS2/FUCA1/GLA/GM2A/GNS/GUSB/H<br>EXA/LAMP1/LAMP2/LIPA/MAN2B1/CTSA/PPT1/LGMN/PSAP/LAPT44/MCCOLN1               | 29    |
| IGKC        | 2.238345421 | 0         | M2_TAM    |    | Antigen processing and presentation               | 1.25E-14 | B2M/CALR/CD4/CTSB/CTSL/CTSS/HLA-A/HLA-B/HLA-C/HLA-DMA/HLA-DPA1/HLA-DPB1/HLA-DQA1/HLA-DQA2/HLA-<br>DQB1/HLA-DRA/HLA-DRB1/HLA-DRB5/HSPA5/LGMN                                    | 20    |
| APOH        | 1.91595982  | 0         | M2_TAM    |    | Phagosome                                         | 2.51E-12 | ATP6AP1/CALR/CTSL/CTSS/CYBA/FCGR2A/FCGR2B/HLA-A/HLA-B/HLA-C/HLA-DMA/HLA-DPA1/HLA-DPB1/HLA-<br>DQA1/HLA-DQA2/HLA-DQB1/HLA-DRA/HLA-DRB1/HLA-DRB5/LAMP1/LAMP2/MSR1/ATP6V0E1/CD209 | 24    |
| AMBP        | 1.557892739 | 0         | M2_TAM    |    | Staphylococcus aureus infection                   | 8.29E-11 | C1QA/C1QB/C1QC/C2/C3AR1/CFD/FCGR2A/FCGR2B/FPR3/HLA-DMA/HLA-DPA1/HLA-DPB1/HLA-DQA1/HLA-<br>DQA2/HLA-DQB1/HLA-DRA/HLA-DRB1/HLA-DRB5                                              | 18    |
| APOE        | 1.513499426 | 0         | M2_TAM    |    | Complement and coagulation cascades               | 9.68E-11 | A2M/SERPINC1/SERPINC1/C1QA/C1QB/C1QC/C2/C3AR1/CD59/CLU/CFD/FCG/CFHR1/CFHR2/KNG1/VTN/VSIG4                                                                                      | 17    |
| TTR         | 1.495095512 | 0         | M2_TAM    |    | Allograft rejection                               | 2.00E-10 | HLA-A/HLA-B/HLA-C/HLA-DMA/HLA-DPA1/HLA-DPB1/HLA-DQA1/HLA-DQA2/HLA-DQB1/HLA-DRA/HLA-DRB1/HLA-DRB5                                                                               | 12    |
| GSTA1       | 1.356746831 | 0         | M2_TAM    |    | Mineral absorption                                | 5.29E-10 | ATOX1/ATP1B1/HMOX1/MT1A/MT1B/MT1E/MT1F/MT1G/MT1H/MT1M/MT1X/MT2A/TF/SLC40A1                                                                                                     | 14    |
| MT1H        | 1.332326953 | 0         | M2_TAM    |    | Graft-versus-host disease                         | 7.40E-10 | HLA-A/HLA-B/HLA-C/HLA-DMA/HLA-DPA1/HLA-DPB1/HLA-DQA1/HLA-DQA2/HLA-DQB1/HLA-DRA/HLA-DRB1/HLA-DRB5                                                                               | 12    |
| LGMN        | 1.292719854 | 0         | M2_TAM    |    | Type I diabetes mellitus                          | 1.00E-09 | HLA-A/HLA-B/HLA-C/HLA-DMA/HLA-DPA1/HLA-DPB1/HLA-DQA1/HLA-DQA2/HLA-DQB1/HLA-DRA/HLA-DRB1/HLA-DRB5                                                                               | 12    |
| IFI27       | 1.289213208 | 0         | M2_TAM    |    | Viral myocarditis                                 | 5.94E-09 | HLA-A/HLA-B/HLA-C/HLA-DMA/HLA-DPA1/HLA-DPB1/HLA-DQA1/HLA-DQA2/HLA-DQB1/HLA-DRA/HLA-DRB1/HLA-<br>DRB5/CYCS                                                                      | 13    |
| MT1G        | 1.270709383 | 0         | M2_TAM    |    | Autoimmune thyroid disease                        | 1.37E-08 | HLA-A/HLA-B/HLA-C/HLA-DMA/HLA-DPA1/HLA-DPB1/HLA-DQA1/HLA-DQA2/HLA-DQB1/HLA-DRA/HLA-DRB1/HLA-DRB5                                                                               | 12    |
| GPNUMB      | 1.241857536 | 0         | M2_TAM    |    | Leishmaniasis                                     | 1.69E-08 | CYBA/FCGR2A/FOS/HLA-DMA/HLA-DPA1/HLA-DPB1/HLA-DQA1/HLA-DQA2/HLA-DQB1/HLA-DRA/HLA-DRB1/HLA-<br>DRB5/IFNGR1/JUN                                                                  | 14    |
| CTSD        | 1.217118757 | 0         | M2_TAM    |    | Tuberculosis                                      | 1.83E-08 | ATP6AP1/CALM3/CTSD/CTSS/FCGR2A/FCGR2B/HLA-DMA/HLA-DPA1/HLA-DPB1/HLA-DQA1/HLA-DQA2/HLA-<br>DQB1/HLA-DRA/HLA-DRB1/HLA-DRB5/HSPA9/IFNGR1/LAMP1/LAMP2/CD209/CYCS                   | 21    |
| ACP5        | 1.152773182 | 0         | M2_TAM    |    | Rheumatoid arthritis                              | 2.82E-08 | ACP5/ATP6AP1/CTSL/FOS/HLA-DMA/HLA-DPA1/HLA-DPB1/HLA-DQA1/HLA-DQA2/HLA-DQB1/HLA-DRA/HLA-<br>DRB1/HLA-DRB5/JUN/ATP6V0E1                                                          | 15    |
| PLD3        | 1.112303888 | 0         | M2_TAM    |    | Asthma                                            | 9.08E-08 | HLA-DMA/HLA-DPA1/HLA-DPB1/HLA-DQA1/HLA-DQA2/HLA-DQB1/HLA-DRA/HLA-DRB1/HLA-DRB5                                                                                                 | 9     |
| CHMP1B      | 1.112094842 | 0         | M2_TAM    |    | Chemical carcinogenesis - reactive oxygen species | 7.35E-07 | ATP5MC1/ATP5MC3/COX7B/CYBA/AKR1C1/EPHX1/FOS/GSTA1/HMOX1/JUN/MGST1/MGST3/NDUFA1/NDUFA4/NDUFB<br>7/NDUFC2/NDUFS6/SOD2/UQCRRH/AKR1C3/NDUFB11                                      | 21    |
| RARRES2     | 1.080801192 | 0         | M2_TAM    |    | Cholesterol metabolism                            | 7.89E-07 | ABCA1/APOA1/APOC1/APOC2/APOC3/APOE/APOH/LIPA/LRP1                                                                                                                              | 10    |
| MGST1       | 1.043744388 | 0         | M2_TAM    |    | Fluid shear stress and atherosclerosis            | 1.17E-06 | ASS1/CALM3/CTSL/CYBA/DUSP1/FOS/GSTA1/HMOX1/JUN/MGST1/MGST3/MMP9/HSP90B1/TXN/VCAM1/KLF2                                                                                         | 16    |
| VTN         | 1.033612405 | 0         | M2_TAM    |    | Th1 and Th2 cell differentiation                  | 1.18E-06 | CD4/FOS/HLA-DMA/HLA-DPA1/HLA-DPB1/HLA-DQA1/HLA-DQA2/HLA-DQB1/HLA-DRA/HLA-DRB1/HLA-<br>DRB5/IFNGR1/JUN                                                                          | 13    |
| HSPA5       | 1.027095474 | 0         | M2_TAM    |    | Inflammatory bowel disease                        | 1.28E-06 | HLA-DMA/HLA-DPA1/HLA-DPB1/HLA-DQA1/HLA-DQA2/HLA-DQB1/HLA-DRA/HLA-DRB1/HLA-DRB5/IFNGR1/JUN                                                                                      | 11    |
| A2M         | 0.977486565 | 0         | M2_TAM    |    | Epstein-Barr virus infection                      | 2.59E-06 | B2M/CALR/HLA-A/HLA-B/HLA-C/HLA-DMA/HLA-DPA1/HLA-DPB1/HLA-DQA1/HLA-DQA2/HLA-DQB1/HLA-DRA/HLA-<br>DRB1/HLA-DRB5/HES1/JUN/GADD45B/ISG15/CYCS                                      | 19    |
| FOLR2       | 0.974901877 | 0         | M2_TAM    |    | Hematopoietic cell lineage                        | 2.76E-06 | CD4/CD9/CD59/CSF1R/HLA-DMA/HLA-DPA1/HLA-DPB1/HLA-DQA1/HLA-DQA2/HLA-DQB1/HLA-DRA/HLA-DRB1/HLA-<br>DRB5                                                                          | 13    |
| LIPA        | 0.962861681 | 0         | M2_TAM    |    | Intestinal immune network for IgA production      | 6.01E-06 | HLA-DMA/HLA-DPA1/HLA-DPB1/HLA-DQA1/HLA-DQA2/HLA-DQB1/HLA-DRA/HLA-DRB1/HLA-DRB5                                                                                                 | 9     |
| C1QC        | 0.961885147 | 0         | M2_TAM    |    | Th17 cell differentiation                         | 7.37E-06 | CD4/FOS/HLA-DMA/HLA-DPA1/HLA-DPB1/HLA-DQA1/HLA-DQA2/HLA-DQB1/HLA-DRA/HLA-DRB1/HLA-<br>DRB5/IFNGR1/JUN                                                                          | 13    |
| SLC40A1     | 0.938547432 | 0         | M2_TAM    |    | Cell adhesion molecules                           | 1.35E-05 | CD4/HLA-A/HLA-B/HLA-C/HLA-DMA/HLA-DPA1/HLA-DPB1/HLA-DQA1/HLA-DQA2/HLA-DQB1/HLA-DRA/HLA-DRB1/HLA-<br>DRB5/SIGLEC1/VCAM1                                                         | 15    |
| SELENOP     | 0.92655092  | 0         | M2_TAM    |    | Systemic lupus erythematosus                      | 2.04E-05 | C1QA/C1QB/C1QC/C2/FCGR2A/HLA-DMA/HLA-DPA1/HLA-DPB1/HLA-DQA1/HLA-DQA2/HLA-DQB1/HLA-DRA/HLA-<br>DRB1/HLA-DRB5                                                                    | 14    |
| ORM1        | 0.920935045 | 0         | M2_TAM    |    | Human T-cell leukemia virus 1 infection           | 3.70E-05 | B2M/CALR/CD4/FOS/HLA-A/HLA-B/HLA-C/HLA-DMA/HLA-DPA1/HLA-DPB1/HLA-DQA1/HLA-DQA2/HLA-DQB1/HLA-<br>DRA/HLA-DRB1/HLA-DRB5/JUN/NRP1                                                 | 18    |
| CYB5A       | 0.918487735 | 0         | M2_TAM    |    | Toxoplasmosis                                     | 5.41E-05 | HLA-DMA/HLA-DPA1/HLA-DPB1/HLA-DQA1/HLA-DQA2/HLA-DQB1/HLA-DRA/HLA-DRB1/HLA-DRB5/IFNGR1/LY96/CYCS                                                                                | 12    |

|          |             |   |        |                                                 |             |                                                                                                             |    |
|----------|-------------|---|--------|-------------------------------------------------|-------------|-------------------------------------------------------------------------------------------------------------|----|
| VCAM1    | 0.907459049 | 0 | M2_TAM | Oxidative phosphorylation                       | 7.53E-05    | ATP5MC1/ATP5MC3/ATP6AP1/COX7B/NDUFA1/NDUFA4/NDUFB7/NDUFC2/NDUFS6/UQCRH/ATP6V0E1/CYCS/NDUFB11                | 13 |
| C1QB     | 0.903949333 | 0 | M2_TAM | Pertussis                                       | 0.000219044 | SERPING1/C1QA/C1QB/C1QC/C2/CALM3/FOS/JUN/LY96                                                               | 9  |
| CD163    | 0.902149073 | 0 | M2_TAM | Apoptosis                                       | 0.000347836 | CTSC/CTSB/CTSD/CTSH/CTSL/CTSS/CTSZ/FOS/JUN/LMNA/GADD45B/CYCS                                                | 12 |
| IFI6     | 0.889962751 | 0 | M2_TAM | Parkinson disease                               | 0.001021224 | ATP5MC1/ATP5MC3/CALM3/COX7B/DUSP1/HSPA5/NDUFA1/NDUFA4/NDUFB7/NDUFC2/NDUFS6/PSMB1/TXN/UBB/UQCRH/CYCS/NDUFB11 | 17 |
| IGHG1    | 0.882368834 | 0 | M2_TAM | Prion disease                                   | 0.001357696 | ATP5MC1/ATP5MC3/C1QA/C1QB/C1QC/COX7B/CYBA/HSPA5/NDUFA1/NDUFA4/NDUFB7/NDUFC2/NDUFS6/PSMB1/UQCRH/CYCS/NDUFB11 | 17 |
| MT1M     | 0.881186737 | 0 | M2_TAM | Diabetic cardiomyopathy                         | 0.001380077 | ATP5MC1/ATP5MC3/COX7B/CTSD/CYBA/MMP9/NDUFA1/NDUFA4/NDUFB7/NDUFC2/NDUFS6/UQCRH/MPC2/NDUFB11                  | 14 |
| C1QA     | 0.877923791 | 0 | M2_TAM | Lipid and atherosclerosis                       | 0.002367945 | ABCA1/APOA1/CALM3/CYBA/CYP2A6/FOS/HSPA5/JUN/MMP9/SOD2/HSP90B1/VCAM1/LY96/CYCS                               | 14 |
| APOC1    | 0.872905091 | 0 | M2_TAM | Influenza A                                     | 0.002596861 | HLA-DMA/HLA-DPA1/HLA-DPB1/HLA-DQA1/HLA-DQA2/HLA-DQB1/HLA-DRA/HLA-DRB1/HLA-DRB5/IFNGR1/MX1/CYCS              | 12 |
| HES1     | 0.862241615 | 0 | M2_TAM | Osteoclast differentiation                      | 0.002692974 | ACP5/CSF1R/CYBA/FCGR2A/FCGR2B/FOS/IFNGR1/JUN/JUNB/LILRB5                                                    | 10 |
| HLA-DRB1 | 0.840065902 | 0 | M2_TAM | Arginine biosynthesis                           | 0.00275278  | ARG1/ASS1/CPS1/GLUL                                                                                         | 4  |
| IGLC2    | 0.827587333 | 0 | M2_TAM | Non-alcoholic fatty liver disease               | 0.003558002 | COX7B/FOS/JUN/NDUFA1/NDUFA4/NDUFB7/NDUFC2/NDUFS6/UQCRH/CYCS/NDUFB11                                         | 11 |
| LYZ      | 0.820146141 | 0 | M2_TAM | PPAR signaling pathway                          | 0.004385655 | APOA1/APOC3/DBI/FABP4/FABP5/HMGCS1/PCK1                                                                     | 7  |
| PSAP     | 0.818326557 | 0 | M2_TAM | Coronavirus disease - COVID-19                  | 0.004707141 | C1QA/C1QB/C1QC/C2/C3AR1/CFD/FCGR2A/FGB/FOS/JUN/MX1/RPS9/NRP1/ISG15                                          | 14 |
| IGLC1    | 0.817778702 | 0 | M2_TAM | Chagas disease                                  | 0.006871661 | C1QA/C1QB/C1QC/CALR/FOS/IFNGR1/JUN/KNG1                                                                     | 8  |
| FOS      | 0.812110655 | 0 | M2_TAM | Other glycan degradation                        | 0.012322508 | FUCA1/HEXA/MAN2B1                                                                                           | 3  |
| ILF3-DT  | 0.808234994 | 0 | M2_TAM | Glycosaminoglycan degradation                   | 0.014341231 | GNS/GUSB/HEXA                                                                                               | 3  |
| SDS      | 0.786250022 | 0 | M2_TAM | Biosynthesis of amino acids                     | 0.016789172 | ALDOB/ARG1/ASS1/CPS1/GLUL/SDS                                                                               | 6  |
| SAA1     | 0.783164416 | 0 | M2_TAM | Thyroid hormone synthesis                       | 0.016789172 | ALB/ATP1B1/HSPA5/SERPINA7/HSP90B1/TTR                                                                       | 6  |
| BLVRB    | 0.778169164 | 0 | M2_TAM | Kaposi sarcoma-associated herpesvirus infection | 0.017902887 | CALM3/CCR1/RCAN1/FOS/HLA-A/HLA-B/HLA-C/IFNGR1/JUN/UBB/CYCS                                                  | 11 |
| MT1E     | 0.772074094 | 0 | M2_TAM | Alanine, aspartate and glutamate metabolism     | 0.018041206 | AGXT/ASS1/CPS1/GLUL                                                                                         | 4  |
| GADD45B  | 0.762229999 | 0 | M2_TAM | African trypanosomiasis                         | 0.018041206 | APOA1/HPR/KNG1/VCAM1                                                                                        | 4  |
| PLA2G7   | 0.757933249 | 0 | M2_TAM | Riboflavin metabolism                           | 0.018880245 | ACP5/BLVRB                                                                                                  | 2  |
| CD59     | 0.756950494 | 0 | M2_TAM | Metabolism of xenobiotics by cytochrome P450    | 0.020022152 | CYP2A6/AKR1C1/EPHX1/GSTA1/MGST1/MGST3                                                                       | 6  |
| BST2     | 0.745819345 | 0 | M2_TAM | Renin-angiotensin system                        | 0.024189234 | CTSA/PRCP/ATP6AP2                                                                                           | 3  |
| MSR1     | 0.740330483 | 0 | M2_TAM | Proximal tubule bicarbonate reclamation         | 0.024189234 | ATP1B1/MDH1/PCK1                                                                                            | 3  |
| FCGR1    | 0.731472349 | 0 | M2_TAM | Ferroptosis                                     | 0.025418747 | HMOX1/SLC3A2/TF/SLC40A1                                                                                     | 4  |
| IGHG4    | 0.731049025 | 0 | M2_TAM | Human immunodeficiency virus 1 infection        | 0.031840126 | B2M/BST2/CALM3/CALR/CD4/FOS/HLA-A/HLA-B/HLA-C/JUN/CYCS                                                      | 11 |
| MT-ND3   | 0.729114164 | 0 | M2_TAM | Chemical carcinogenesis - DNA adducts           | 0.04072842  | CYP2A6/EPHX1/GSTA1/MGST1/MGST3                                                                              | 5  |
| HULC     | 0.726932768 | 0 | M2_TAM | Huntington disease                              | 0.042379739 | ATP5MC1/ATP5MC3/COX7B/NDUFA1/NDUFA4/NDUFB7/NDUFC2/NDUFS6/PSMB1/SLC1A3/SOD2/UQCRH/CYCS/NDUFB11               | 14 |
| ATF3     | 0.722019079 | 0 | M2_TAM | Sphingolipid metabolism                         | 0.04494831  | ASAH1/GLA/PSAP/DEGS1                                                                                        | 4  |
| GDF15    | 0.714665597 | 0 | M2_TAM | Glyoxylate and dicarboxylate metabolism         | 0.048241558 | AGXT/GLUL/MDH1                                                                                              | 3  |
| CPVL     | 0.712044972 | 0 | M2_TAM |                                                 |             |                                                                                                             |    |
| GRN      | 0.686708552 | 0 | M2_TAM |                                                 |             |                                                                                                             |    |
| HLA-DRB5 | 0.686665263 | 0 | M2_TAM |                                                 |             |                                                                                                             |    |
| LY6E     | 0.686443355 | 0 | M2_TAM |                                                 |             |                                                                                                             |    |
| CALM3    | 0.683490586 | 0 | M2_TAM |                                                 |             |                                                                                                             |    |
| JUNB     | 0.679361084 | 0 | M2_TAM |                                                 |             |                                                                                                             |    |
| ISG15    | 0.66877338  | 0 | M2_TAM |                                                 |             |                                                                                                             |    |
| MT-ND5   | 0.658938914 | 0 | M2_TAM |                                                 |             |                                                                                                             |    |
| MMP9     | 0.653791486 | 0 | M2_TAM |                                                 |             |                                                                                                             |    |
| ZNF331   | 0.650937754 | 0 | M2_TAM |                                                 |             |                                                                                                             |    |
| FGL1     | 0.647347552 | 0 | M2_TAM |                                                 |             |                                                                                                             |    |
| EPHX1    | 0.639246457 | 0 | M2_TAM |                                                 |             |                                                                                                             |    |
| MS4A4A   | 0.636934501 | 0 | M2_TAM |                                                 |             |                                                                                                             |    |
| ASAH1    | 0.635409923 | 0 | M2_TAM |                                                 |             |                                                                                                             |    |
| HLA-DQA1 | 0.624713852 | 0 | M2_TAM |                                                 |             |                                                                                                             |    |
| CTSL     | 0.617293517 | 0 | M2_TAM |                                                 |             |                                                                                                             |    |
| GLA      | 0.608570598 | 0 | M2_TAM |                                                 |             |                                                                                                             |    |
| ANG      | 0.604668563 | 0 | M2_TAM |                                                 |             |                                                                                                             |    |
| LGALS3BP | 0.603234557 | 0 | M2_TAM |                                                 |             |                                                                                                             |    |
| CD83     | 0.603059929 | 0 | M2_TAM |                                                 |             |                                                                                                             |    |
| HLA-DRA  | 0.602894272 | 0 | M2_TAM |                                                 |             |                                                                                                             |    |
| SGK1     | 0.601236043 | 0 | M2_TAM |                                                 |             |                                                                                                             |    |
| MT-ATP6  | 0.601108019 | 0 | M2_TAM |                                                 |             |                                                                                                             |    |
| FUCA1    | 0.600464582 | 0 | M2_TAM |                                                 |             |                                                                                                             |    |
| ADI1     | 0.599873834 | 0 | M2_TAM |                                                 |             |                                                                                                             |    |
| CTSS     | 0.597617564 | 0 | M2_TAM |                                                 |             |                                                                                                             |    |
| TF       | 0.597438886 | 0 | M2_TAM |                                                 |             |                                                                                                             |    |

|            |             |   |        |
|------------|-------------|---|--------|
| TIMP2      | 0.596963757 | 0 | M2_TAM |
| ORM2       | 0.582248886 | 0 | M2_TAM |
| MT-CYB     | 0.579491656 | 0 | M2_TAM |
| ALDOB      | 0.578580354 | 0 | M2_TAM |
| AGXT       | 0.578552568 | 0 | M2_TAM |
| HLA-C      | 0.566578915 | 0 | M2_TAM |
| MT2A       | 0.56251918  | 0 | M2_TAM |
| CFD        | 0.557404983 | 0 | M2_TAM |
| CFHR1      | 0.555654507 | 0 | M2_TAM |
| KNG1       | 0.553328689 | 0 | M2_TAM |
| CTSB       | 0.54919287  | 0 | M2_TAM |
| FABP5      | 0.548944969 | 0 | M2_TAM |
| CD68       | 0.539207142 | 0 | M2_TAM |
| IFI44L     | 0.538741773 | 0 | M2_TAM |
| TSPAN4     | 0.527268521 | 0 | M2_TAM |
| MT1F       | 0.520980776 | 0 | M2_TAM |
| MPC2       | 0.516973914 | 0 | M2_TAM |
| ATP5MC1    | 0.516290537 | 0 | M2_TAM |
| KLF2       | 0.510360695 | 0 | M2_TAM |
| MT1B       | 0.509163485 | 0 | M2_TAM |
| NUPR1      | 0.505132765 | 0 | M2_TAM |
| C2         | 0.503384886 | 0 | M2_TAM |
| GPR34      | 0.502139737 | 0 | M2_TAM |
| CREG1      | 0.502063054 | 0 | M2_TAM |
| TSC22D1    | 0.501614417 | 0 | M2_TAM |
| EBP        | 0.498726926 | 0 | M2_TAM |
| HLA-DPB1   | 0.494507366 | 0 | M2_TAM |
| CCL18      | 0.49182256  | 0 | M2_TAM |
| HLA-DMA    | 0.491351902 | 0 | M2_TAM |
| B2M        | 0.491178017 | 0 | M2_TAM |
| PRDX1      | 0.490654622 | 0 | M2_TAM |
| HLA-DPA1   | 0.490096841 | 0 | M2_TAM |
| TMEM176B   | 0.481601311 | 0 | M2_TAM |
| PCK1       | 0.480131199 | 0 | M2_TAM |
| MT-ND4L    | 0.479445451 | 0 | M2_TAM |
| GPR183     | 0.477358896 | 0 | M2_TAM |
| EIF4A3     | 0.47685682  | 0 | M2_TAM |
| PEBP1      | 0.476758624 | 0 | M2_TAM |
| DHRS9      | 0.462618658 | 0 | M2_TAM |
| AL355881.1 | 0.461824117 | 0 | M2_TAM |
| LY96       | 0.457784079 | 0 | M2_TAM |
| CD63       | 0.456958361 | 0 | M2_TAM |
| CTSC       | 0.452363151 | 0 | M2_TAM |
| LRP1       | 0.452217649 | 0 | M2_TAM |
| SLCO2B1    | 0.449212429 | 0 | M2_TAM |
| PRMT9      | 0.448645571 | 0 | M2_TAM |
| PGRMC1     | 0.447761918 | 0 | M2_TAM |
| HLA-DQB1   | 0.438655334 | 0 | M2_TAM |
| NDUFA4     | 0.438422368 | 0 | M2_TAM |
| SIGLEC1    | 0.436796474 | 0 | M2_TAM |
| AKR1C3     | 0.43539119  | 0 | M2_TAM |
| FPR3       | 0.433367551 | 0 | M2_TAM |
| ADA2       | 0.432594199 | 0 | M2_TAM |
| ATP1B1     | 0.432179709 | 0 | M2_TAM |
| PRAP1      | 0.430631738 | 0 | M2_TAM |
| IGFBP3     | 0.42738984  | 0 | M2_TAM |
| GC         | 0.404746958 | 0 | M2_TAM |
| CTSA       | 0.398935916 | 0 | M2_TAM |
| MT1X       | 0.398794631 | 0 | M2_TAM |
| ARG1       | 0.398147569 | 0 | M2_TAM |
| SAA4       | 0.393428099 | 0 | M2_TAM |
| LAMP2      | 0.392802073 | 0 | M2_TAM |
| CYBA       | 0.381790889 | 0 | M2_TAM |
| BEX3       | 0.376135937 | 0 | M2_TAM |

|          |             |           |        |
|----------|-------------|-----------|--------|
| SERPINC1 | 0.370635968 | 0         | M2_TAM |
| CYP2A6   | 0.362828107 | 0         | M2_TAM |
| TMBIM6   | 0.360621468 | 0         | M2_TAM |
| ALDH1A1  | 0.35503761  | 0         | M2_TAM |
| LGALS4   | 0.349978299 | 0         | M2_TAM |
| CFHR2    | 0.349245899 | 0         | M2_TAM |
| CPS1     | 0.346029374 | 0         | M2_TAM |
| HGD      | 0.342745735 | 0         | M2_TAM |
| XCL2     | 0.340082482 | 0         | M2_TAM |
| XCL1     | 0.339551603 | 0         | M2_TAM |
| PXMP2    | 0.338121762 | 0         | M2_TAM |
| HTR2B    | 0.336701765 | 0         | M2_TAM |
| ENPP2    | 0.330985993 | 0         | M2_TAM |
| HSD17B6  | 0.314776972 | 0         | M2_TAM |
| AZGP1    | 0.304342016 | 0         | M2_TAM |
| STC1     | 0.28885993  | 0         | M2_TAM |
| HPR      | 0.288658353 | 0         | M2_TAM |
| SERPINA7 | 0.267481112 | 0         | M2_TAM |
| IGFBP2   | 0.263881082 | 0         | M2_TAM |
| C2CD4B   | 0.262281959 | 0         | M2_TAM |
| ASS1     | 0.26125025  | 0         | M2_TAM |
| MT1A     | 0.258110207 | 4.47E-303 | M2_TAM |
| HERPUD1  | 0.466412431 | 5.60E-302 | M2_TAM |
| C1orf56  | 0.308087219 | 3.10E-301 | M2_TAM |
| FABP4    | 0.405035452 | 7.64E-301 | M2_TAM |
| LAMP1    | 0.413795059 | 4.02E-297 | M2_TAM |
| APOA1    | 1.409973367 | 1.91E-294 | M2_TAM |
| FCGR2B   | 0.355743999 | 6.35E-294 | M2_TAM |
| TM4SF1   | 0.259492564 | 4.48E-293 | M2_TAM |
| CALR     | 0.395504644 | 7.56E-291 | M2_TAM |
| UBB      | 0.361486866 | 3.41E-290 | M2_TAM |
| MCOLN1   | 0.410254407 | 2.38E-288 | M2_TAM |
| IGFBP7   | 0.426102479 | 1.83E-287 | M2_TAM |
| RGS2     | 0.524074729 | 1.55E-285 | M2_TAM |
| MDH1     | 0.345161875 | 2.31E-285 | M2_TAM |
| NDUFC2   | 0.439568546 | 5.41E-285 | M2_TAM |
| CYCS     | 0.537200876 | 8.43E-285 | M2_TAM |
| APLP2    | 0.466431955 | 1.54E-283 | M2_TAM |
| ATP6V0E1 | 0.358779185 | 1.03E-282 | M2_TAM |
| CLU      | 0.551788322 | 1.63E-282 | M2_TAM |
| MX1      | 0.330751221 | 1.16E-279 | M2_TAM |
| FGL2     | 0.423915411 | 1.25E-279 | M2_TAM |
| C3AR1    | 0.388299854 | 2.50E-279 | M2_TAM |
| NR4A2    | 0.664235682 | 8.77E-277 | M2_TAM |
| UNC93B1  | 0.354689349 | 2.71E-274 | M2_TAM |
| LILRB5   | 0.349883306 | 3.34E-273 | M2_TAM |
| DDT      | 0.638873805 | 6.43E-273 | M2_TAM |
| SCPEP1   | 0.352922833 | 8.50E-272 | M2_TAM |
| SOD2     | 0.40437661  | 9.36E-271 | M2_TAM |
| HP       | 1.171733535 | 2.98E-270 | M2_TAM |
| CTSZ     | 0.458852349 | 5.70E-270 | M2_TAM |
| MPEG1    | 0.416323628 | 4.21E-269 | M2_TAM |
| LMNA     | 0.288163121 | 3.32E-268 | M2_TAM |
| HSPE1    | 0.48112281  | 5.51E-266 | M2_TAM |
| GCHFR    | 0.278119996 | 3.55E-265 | M2_TAM |
| PRCP     | 0.393751379 | 1.78E-262 | M2_TAM |
| PIK3IP1  | 0.295817385 | 2.15E-262 | M2_TAM |
| PRDX2    | 0.405936663 | 7.29E-261 | M2_TAM |
| CTSH     | 0.362926882 | 3.55E-258 | M2_TAM |
| IGSF6    | 0.462598524 | 9.92E-258 | M2_TAM |
| NDUFS6   | 0.50605299  | 1.09E-257 | M2_TAM |
| MAN2B1   | 0.344961083 | 3.51E-257 | M2_TAM |
| CKS2     | 0.366537071 | 1.05E-256 | M2_TAM |
| RCAN1    | 0.334973736 | 3.67E-256 | M2_TAM |

|            |             |           |        |
|------------|-------------|-----------|--------|
| HEXA       | 0.363214635 | 1.89E-255 | M2_TAM |
| LGALS3     | 0.357384583 | 1.86E-254 | M2_TAM |
| DUSP1      | 0.412470035 | 1.45E-253 | M2_TAM |
| HINT1      | 0.429501613 | 3.08E-253 | M2_TAM |
| AKR1C1     | 0.250875769 | 1.78E-252 | M2_TAM |
| TCHH       | 0.309505953 | 1.82E-252 | M2_TAM |
| RHOB       | 0.388571056 | 5.04E-252 | M2_TAM |
| CCDC107    | 0.33483832  | 5.67E-252 | M2_TAM |
| TPP1       | 0.39299861  | 1.55E-248 | M2_TAM |
| TMEM59     | 0.343217115 | 1.27E-247 | M2_TAM |
| HMOX1      | 0.293590079 | 1.78E-247 | M2_TAM |
| PRDX6      | 0.374706351 | 2.73E-247 | M2_TAM |
| PDIA6      | 0.335829451 | 1.39E-246 | M2_TAM |
| TCEAL9     | 0.299538338 | 7.36E-246 | M2_TAM |
| CD209      | 0.331323565 | 2.34E-245 | M2_TAM |
| TMEM205    | 0.313671278 | 8.81E-245 | M2_TAM |
| FCGR2A     | 0.451492575 | 2.70E-244 | M2_TAM |
| ZNF141     | 0.520336112 | 1.70E-242 | M2_TAM |
| IGHA1      | 0.315096568 | 1.22E-240 | M2_TAM |
| DAD1       | 0.333243101 | 3.39E-240 | M2_TAM |
| ABCC5      | 0.312303434 | 1.43E-238 | M2_TAM |
| DCXR       | 0.491102171 | 2.21E-237 | M2_TAM |
| GNS        | 0.3487122   | 1.55E-235 | M2_TAM |
| AL118558.3 | 0.332829756 | 4.57E-233 | M2_TAM |
| MS4A6A     | 0.370890508 | 1.82E-229 | M2_TAM |
| RBP4       | 0.880556997 | 6.39E-229 | M2_TAM |
| IFNGR1     | 0.350884306 | 3.90E-227 | M2_TAM |
| COX7B      | 0.480543517 | 2.09E-226 | M2_TAM |
| TWISTNB    | 0.263172441 | 3.02E-226 | M2_TAM |
| CCR1       | 0.337017102 | 1.49E-225 | M2_TAM |
| TIMP3      | 0.328470617 | 1.19E-224 | M2_TAM |
| SLAMF8     | 0.26832611  | 3.58E-224 | M2_TAM |
| NPL        | 0.321140831 | 4.85E-223 | M2_TAM |
| MGST3      | 0.321411083 | 1.31E-221 | M2_TAM |
| DBI        | 0.332117553 | 7.27E-221 | M2_TAM |
| ACAA2      | 0.289841412 | 2.36E-217 | M2_TAM |
| RASGEF1B   | 0.347871472 | 5.59E-215 | M2_TAM |
| LAPTM4A    | 0.302344316 | 7.54E-215 | M2_TAM |
| AIG1       | 0.272069803 | 2.62E-214 | M2_TAM |
| ALG13      | 0.350877001 | 1.80E-212 | M2_TAM |
| SLC3A2     | 0.303001249 | 8.42E-212 | M2_TAM |
| SERPING1   | 0.317871678 | 1.72E-211 | M2_TAM |
| HCST       | 0.333287505 | 2.08E-208 | M2_TAM |
| MT-CO3     | 0.31643984  | 8.34E-208 | M2_TAM |
| CD84       | 0.36977943  | 1.55E-207 | M2_TAM |
| HMGCS1     | 0.253836796 | 2.16E-207 | M2_TAM |
| SELENOK    | 0.407666449 | 6.14E-207 | M2_TAM |
| LRPAP1     | 0.294777208 | 7.21E-207 | M2_TAM |
| RPS9       | 0.253708092 | 6.60E-206 | M2_TAM |
| HES4       | 0.261483178 | 1.06E-205 | M2_TAM |
| ATOX1      | 0.289631327 | 1.91E-205 | M2_TAM |
| CD53       | 0.305596299 | 4.01E-203 | M2_TAM |
| HLA-B      | 0.297667135 | 8.81E-202 | M2_TAM |
| TXN        | 0.330160956 | 9.39E-201 | M2_TAM |
| SLC18B1    | 0.259246266 | 9.65E-201 | M2_TAM |
| PCBD1      | 0.271135736 | 1.12E-200 | M2_TAM |
| CPM        | 0.364367039 | 6.39E-200 | M2_TAM |
| AXL        | 0.280696704 | 2.12E-197 | M2_TAM |
| MAFF       | 0.280677166 | 1.66E-195 | M2_TAM |
| ATP6AP1    | 0.27817329  | 2.52E-194 | M2_TAM |
| SLC1A3     | 0.296463921 | 3.85E-194 | M2_TAM |
| TMEM37     | 0.250420176 | 1.60E-193 | M2_TAM |
| GM2A       | 0.286700986 | 1.01E-187 | M2_TAM |
| EPB41L2    | 0.334919636 | 3.27E-186 | M2_TAM |

|            |             |           |        |
|------------|-------------|-----------|--------|
| HAX1       | 0.294487003 | 6.53E-185 | M2_TAM |
| IER2       | 0.32288294  | 2.13E-184 | M2_TAM |
| ANXA1      | 0.260841094 | 4.22E-184 | M2_TAM |
| JUN        | 0.254303257 | 7.56E-184 | M2_TAM |
| CREM       | 0.34896711  | 2.85E-181 | M2_TAM |
| ZBTB10     | 0.272154823 | 4.59E-180 | M2_TAM |
| GUSB       | 0.256820285 | 1.11E-179 | M2_TAM |
| MZT2A      | 0.296534541 | 4.71E-177 | M2_TAM |
| GAMT       | 0.252220978 | 5.89E-177 | M2_TAM |
| ATP6AP2    | 0.281753325 | 1.02E-174 | M2_TAM |
| DEGS1      | 0.259266202 | 9.83E-174 | M2_TAM |
| VMO1       | 0.252389314 | 4.25E-173 | M2_TAM |
| PPT1       | 0.289890373 | 1.01E-172 | M2_TAM |
| MGLL       | 0.255701366 | 2.58E-168 | M2_TAM |
| EPST11     | 0.251927253 | 3.10E-168 | M2_TAM |
| ALB        | 1.060267478 | 1.08E-167 | M2_TAM |
| SSR4       | 0.30392534  | 4.44E-167 | M2_TAM |
| BCAS2      | 0.274114103 | 1.93E-165 | M2_TAM |
| RAB5IF     | 0.306446075 | 2.73E-165 | M2_TAM |
| VSIG4      | 0.288894199 | 2.09E-164 | M2_TAM |
| RGS1       | 0.254842325 | 3.74E-164 | M2_TAM |
| MERTK      | 0.27433095  | 1.35E-162 | M2_TAM |
| FCHO2      | 0.291374858 | 3.97E-161 | M2_TAM |
| DNASE1L3   | 0.533994484 | 7.34E-160 | M2_TAM |
| NRP1       | 0.280624191 | 7.63E-159 | M2_TAM |
| AL499604.1 | 0.250899112 | 2.10E-156 | M2_TAM |
| ARL5B      | 0.256233085 | 3.16E-156 | M2_TAM |
| CENPX      | 0.263758708 | 1.53E-154 | M2_TAM |
| PSMB1      | 0.267153562 | 1.50E-152 | M2_TAM |
| CSF1R      | 0.264137725 | 1.11E-146 | M2_TAM |
| ABCA1      | 0.294428833 | 2.47E-146 | M2_TAM |
| ETFB       | 0.263845179 | 3.26E-145 | M2_TAM |
| UQCRH      | 0.307980449 | 1.94E-142 | M2_TAM |
| GLUL       | 0.274423674 | 3.05E-142 | M2_TAM |
| ATP5MC3    | 0.272142783 | 4.64E-142 | M2_TAM |
| HLA-A      | 0.253742561 | 3.51E-140 | M2_TAM |
| CD4        | 0.26688095  | 3.56E-138 | M2_TAM |
| APOC2      | 0.736685417 | 5.49E-136 | M2_TAM |
| NDUFB11    | 0.343689923 | 1.63E-132 | M2_TAM |
| FGF        | 0.265530136 | 6.95E-132 | M2_TAM |
| HSP90B1    | 0.282276191 | 1.72E-128 | M2_TAM |
| IQGAP2     | 0.30477964  | 2.36E-126 | M2_TAM |
| CD9        | 0.250193925 | 5.62E-120 | M2_TAM |
| MT-ND2     | 0.253592879 | 1.75E-119 | M2_TAM |
| RANBP2     | 0.310433651 | 5.46E-118 | M2_TAM |
| NDUFB7     | 0.250092422 | 1.07E-115 | M2_TAM |
| NDUFA1     | 0.266164206 | 7.07E-114 | M2_TAM |
| HSPA9      | 0.26147252  | 1.62E-111 | M2_TAM |
| CCNT1      | 0.260770391 | 3.75E-111 | M2_TAM |
| YBX3       | 0.265966039 | 1.17E-109 | M2_TAM |
| HLA-DQA2   | 0.492419967 | 2.25E-83  | M2_TAM |
| CD5L       | 0.467089454 | 2.68E-55  | M2_TAM |

---

Supplementary Table 3. Differential expression genes and enrichment pathways of CD8+T cells subpopulations of HCC and cirrhosis (related to Figure 3)

| a. CD8.T    |             |           |                   |                                                   |          |                                                                                                                                                                                                                     |       |
|-------------|-------------|-----------|-------------------|---------------------------------------------------|----------|---------------------------------------------------------------------------------------------------------------------------------------------------------------------------------------------------------------------|-------|
| Gene symbol | avg_log2FC  | p_val_adj | Upregulated group | Description                                       | pvalue   | geneID                                                                                                                                                                                                              | Count |
| AIF1        | 2.015098743 | 0         | CD8.T             | Phagosome                                         | 6.65E-16 | ACTB/ATP6V1B2/ATP6V0B/CALR/CANX/CD14/CTSL/CTSS/CYBB/FCGR2A/FCGR2B/HLA-DMA/HLA-DMB/HLA-DPA1/HLA-DPB1/HLA-DQA1/HLA-DQB1/HLA-DRA/HLA-DRB1/HLA-DRB5/MRC1/MSR1/NCF4/RAC1/TUBA1A/ATP6V1F/TUBA1B/TUBB4B/CLEC7A/TUBA1C/TUBB | 31    |
| MARCKS      | 1.495946344 | 0         | CD8.T             | Rheumatoid arthritis                              | 5.39E-13 | ATP6V1B2/ATP6V0B/CD86/CSF1/CTLA4/CTSL/FOS/CXCL2/HLA-DMA/HLA-DMB/HLA-DPA1/HLA-DPB1/HLA-DQA1/HLA-DQB1/HLA-DRA/HLA-DRB1/HLA-DRB5/IL1B/CXCL8/CCL2/CCL3L1/ATP6V1F                                                        | 22    |
| TOP2A       | 1.4123273   | 0         | CD8.T             | Antigen processing and presentation               | 1.25E-12 | CALR/CANX/CD4/CD74/CTSB/CTSL/CTSS/HLA-DMA/HLA-DMB/HLA-DPA1/HLA-DPB1/HLA-DQA1/HLA-DQB1/HLA-DRA/HLA-DRB1/HLA-DRB5/HSPA1A/HSPA1B/LGMN/IFI30                                                                            | 20    |
| MKI67       | 1.278237834 | 0         | CD8.T             | Tuberculosis                                      | 1.10E-10 | RHOA/ATP6V0B/CALM2/CALM3/CD14/CD74/CEBPB/CTSD/CTSS/FCER1G/FCGR2A/FCGR2B/HLA-DMA/HLA-DMB/HLA-DPA1/HLA-DPB1/HLA-DQA1/HLA-DQB1/HLA-DRA/HLA-DRB1/HLA-DRB5/HSPD1/IFNGR2/IL1B/MRC1/SYK/CLEC7A                             | 27    |
| UBE2C       | 1.246710354 | 0         | CD8.T             | Lysosome                                          | 4.79E-09 | ASAH1/ATP6V0B/CD68/TPP1/CLTA/CTSB/CTSD/CTSH/CTSL/CTSS/CTSZ/HEXA/HEXB/LIPA/MAN2B1/PPT1/LGMN/PSAP/LPTM5/AP1S2/NPC2                                                                                                    | 21    |
| CD14        | 1.161936441 | 0         | CD8.T             | Leishmaniasis                                     | 6.66E-09 | CYBB/FCGR2A/FOS/HLA-DMA/HLA-DMB/HLA-DPA1/HLA-DPB1/HLA-DQA1/HLA-DQB1/HLA-DRA/HLA-DRB1/HLA-DRB5/IFNGR2/IL1B/NCF4/PTGS2                                                                                                | 16    |
| CENPF       | 1.141770403 | 0         | CD8.T             | Human T-cell leukemia virus 1 infection           | 1.26E-08 | SLC25A5/TSPO/CALR/CANX/CCNA2/CD4/CDC20/CDKN2C/FOS/HLA-DMA/HLA-DMB/HLA-DPA1/HLA-DPB1/HLA-DQA1/HLA-DQB1/HLA-DRA/HLA-DRB1/HLA-DRB5/MAD2L1/RAN/RANBP1/RB1/SPI1/NRP1/CCNB2/PTTG1/ANAPC11                                 | 27    |
| CPVL        | 1.040283119 | 0         | CD8.T             | Type I diabetes mellitus                          | 1.56E-08 | CD86/HLA-DMA/HLA-DMB/HLA-DPA1/HLA-DPB1/HLA-DQA1/HLA-DQB1/HLA-DRA/HLA-DRB1/HLA-DRB5/HSPD1/IL1B                                                                                                                       | 12    |
| CD68        | 1.011864119 | 0         | CD8.T             | Asthma                                            | 5.46E-08 | FCER1G/HLA-DMA/HLA-DMB/HLA-DPA1/HLA-DPB1/HLA-DQA1/HLA-DQB1/HLA-DRA/HLA-DRB1/HLA-DRB5                                                                                                                                | 10    |
| PCLAF       | 0.874879178 | 0         | CD8.T             | Graft-versus-host disease                         | 1.30E-07 | CD86/HLA-DMA/HLA-DMB/HLA-DPA1/HLA-DPB1/HLA-DQA1/HLA-DQB1/HLA-DRA/HLA-DRB1/HLA-DRB5/IL1B                                                                                                                             | 11    |
| BIRC5       | 0.821988004 | 0         | CD8.T             | Prion disease                                     | 2.69E-07 | SLC25A5/ATP5PB/ATP5MC3/ATP5PF/ATP5PO/C1QA/C1QB/C1QC/COX5B/COX8A/CYBB/HSPA1A/HSPA1B/IL1B/NCF4/NDUFA4/NDUFB1/PSMB3/RAC1/TUBA1A/COX5A/TUBA1B/TUBB4B/ATP5PD/UQCRCQ/UQCR10/TUBA1C/TUBB                                   | 28    |
| CDK1        | 0.81599768  | 0         | CD8.T             | Hematopoietic cell lineage                        | 2.74E-07 | CD4/CD9/CD14/CD59/CSF1/CSF1R/HLA-DMA/HLA-DMB/HLA-DPA1/HLA-DPB1/HLA-DQA1/HLA-DQB1/HLA-DRA/HLA-DRB1/HLA-DRB5/IL1B                                                                                                     | 16    |
| SPI1        | 0.802039842 | 0         | CD8.T             | Allograft rejection                               | 4.68E-07 | CD86/HLA-DMA/HLA-DMB/HLA-DPA1/HLA-DPB1/HLA-DQA1/HLA-DQB1/HLA-DRA/HLA-DRB1/HLA-DRB5                                                                                                                                  | 10    |
| IGSF6       | 0.744233472 | 0         | CD8.T             | Viral myocarditis                                 | 8.35E-07 | ACTB/CD86/HLA-DMA/HLA-DMB/HLA-DPA1/HLA-DPB1/HLA-DQA1/HLA-DQB1/HLA-DRA/HLA-DRB1/HLA-DRB5/RAC1                                                                                                                        | 12    |
| ASPM        | 0.729000891 | 0         | CD8.T             | Staphylococcus aureus infection                   | 1.02E-06 | C1QA/C1QB/C1QC/CSAR1/FCGR2A/FCGR2B/HLA-DMA/HLA-DMB/HLA-DPA1/HLA-DPB1/HLA-DQA1/HLA-DQB1/HLA-DRA/HLA-DRB1/HLA-DRB5                                                                                                    | 15    |
| MAFB        | 0.721258287 | 0         | CD8.T             | Autoimmune thyroid disease                        | 1.64E-06 | CD86/CTLA4/HLA-DMA/HLA-DMB/HLA-DPA1/HLA-DPB1/HLA-DQA1/HLA-DQB1/HLA-DRA/HLA-DRB1/HLA-DRB5                                                                                                                            | 11    |
| FCGR2A      | 0.717818945 | 0         | CD8.T             | Pertussis                                         | 1.90E-06 | RHOA/C1QA/C1QB/C1QC/CALM2/CALM3/CD14/FOS/GNAI2/IL1B/CXCL8/LY96/PYCARD                                                                                                                                               | 13    |
| CYBB        | 0.716232667 | 0         | CD8.T             | Osteoclast differentiation                        | 2.04E-06 | CSF1/CSF1R/FCGR2A/FCGR2B/FOS/FOSB/GRB2/IFNGR2/IL1B/NCF4/RAC1/SPI1/SYK/TYROBP/ILIRB4/TREM2/SIRPA                                                                                                                     | 17    |
| TK1         | 0.707065886 | 0         | CD8.T             | Inflammatory bowel disease                        | 2.06E-06 | HLA-DMA/HLA-DMB/HLA-DPA1/HLA-DPB1/HLA-DQA1/HLA-DQB1/HLA-DRA/HLA-DRB1/HLA-DRB5/IFNGR2/IL1B/MAF                                                                                                                       | 12    |
| MS4A4A      | 0.703997842 | 0         | CD8.T             | Th1 and Th2 cell differentiation                  | 3.26E-06 | CD4/FOS/HLA-DMA/HLA-DMB/HLA-DPA1/HLA-DPB1/HLA-DQA1/HLA-DQB1/HLA-DRA/HLA-DRB1/HLA-DRB5/IFNGR2/RBPJ/MAF                                                                                                               | 14    |
| TPX2        | 0.70056979  | 0         | CD8.T             | Intestinal immune network for IgA production      | 5.78E-06 | CD86/HLA-DMA/HLA-DMB/HLA-DPA1/HLA-DPB1/HLA-DQA1/HLA-DQB1/HLA-DRA/HLA-DRB1/HLA-DRB5                                                                                                                                  | 10    |
| CDKN3       | 0.692694691 | 0         | CD8.T             | Salmonella infection                              | 5.98E-06 | ACTB/ANXA2/RHOA/RHOB/CD14/FOS/GAPDH/IL1B/CXCL8/PAK1/PFN1/RAC1/TXN/TUBA1A/ARPC5/ARPC3/ARPC1B/TUBA1B/TUBB4B/CYFIP1/LY96/PYCARD/TUBA1C/TUBB                                                                            | 24    |
| TREM2       | 0.687392745 | 0         | CD8.T             | Cell cycle                                        | 7.39E-06 | CCNA2/CCNB1/CDK1/CDC20/CDKN2C/MAD2L1/MCM7/PCNA/PLK1/RAD21/RB1/YWHAE/YWHAH/CCNB2/PTTG1/ANAPC11                                                                                                                       | 16    |
| TIMP2       | 0.679056022 | 0         | CD8.T             | Oxidative phosphorylation                         | 1.63E-05 | ATP5PB/ATP5MC3/ATP5PF/ATP6V1B2/ATP6V0B/ATP5PO/COX5B/COX8A/NDUFA4/NDUFB1/ATP6V1F/COX5A/ATP5MF/ATP5PD/UQCRCQ/UQCR10                                                                                                   | 16    |
| RNASE6      | 0.645422202 | 0         | CD8.T             | Parkinson disease                                 | 1.84E-05 | SLC25A5/ATP5PB/ATP5MC3/ATP5PF/ATP5PO/CALM2/CALM3/COX5B/COX8A/GNAI2/GNAS/NDUFA4/NDUFB1/PSMB3/TXN/TUBA1A/COX5A/TUBA1B/TUBB4B/ATP5PD/UQCRCQ/UQCR10/TUBA1C/TUBB                                                         | 24    |
| STAB1       | 0.641009744 | 0         | CD8.T             | Systemic lupus erythematosus                      | 1.97E-05 | ACTN1/C1QA/C1QB/C1QC/CD86/FCGR2A/HLA-DMA/HLA-DMB/HLA-DPA1/HLA-DPB1/HLA-DQA1/HLA-DQB1/HLA-DRA/HLA-DRB1/HLA-DRB5/SNRPD1                                                                                               | 16    |
| TGFB1       | 0.626693535 | 0         | CD8.T             | Pyrimidine metabolism                             | 2.78E-05 | DCK/DTYMK/DUT/TYMP/NME2/NME4/RRM1/RRM2/TK1/TYMS                                                                                                                                                                     | 10    |
| CDC20       | 0.609207111 | 0         | CD8.T             | Chemical carcinogenesis - reactive oxygen species | 3.30E-05 | SLC25A5/ATP5PB/ATP5MC3/ATP5PF/ATP5PO/COX5B/COX8A/FOS/GRB2/HMOX1/MGST3/NDUFA4/NDUFB1/RAC1/SOD2/COX5A/GSTO1/AKR1A1/ATP5PD/UQCRCQ/UQCR10                                                                               | 21    |
| HMMR        | 0.597126631 | 0         | CD8.T             | Toxoplasmosis                                     | 3.31E-05 | GNAI2/HLA-DMA/HLA-DMB/HLA-DPA1/HLA-DPB1/HLA-DQA1/HLA-DQB1/HLA-DRA/HLA-DRB1/HLA-DRB5/HSPA1A/HSPA1B/IFNGR2/LY96                                                                                                       | 14    |
| GTSE1       | 0.557528839 | 0         | CD8.T             | Biosynthesis of amino acids                       | 5.31E-05 | ENO1/GAPDH/GLUL/IDH2/PFKL/PGAM1/PKG1/PKM/TALDO1/TP11/SDS                                                                                                                                                            | 11    |
| ADAP2       | 0.55665441  | 0         | CD8.T             | Pathogenic Escherichia coli infection             | 5.68E-05 | ACTB/RHOA/FCGR2A/FOS/GAPDH/IL1B/CXCL8/PAK1/RAC1/TUBA1A/ARPC5/ARPC3/ARPC1B/TUBA1B/TUBB4B/CYFIP1/PYCARD/TUBA1C/TUBB                                                                                                   | 19    |
| KCTD12      | 0.555047245 | 0         | CD8.T             | Ferroptosis                                       | 7.13E-05 | CYBB/FTH1/FTL/GPX4/HMOX1/PCBP2/SAT1/SLC40A1                                                                                                                                                                         | 8     |
| CCNB2       | 0.541799116 | 0         | CD8.T             | Diabetic cardiomyopathy                           | 8.53E-05 | PARP1/SLC25A5/ATP5PB/ATP5MC3/ATP5PF/ATP5PO/COX5B/COX8A/CTSD/CYBB/GAPDH/NCF4/NDUFA4/NDUFB1/RAC1/COX5A/ATP5PD/UQCRCQ/UQCR10                                                                                           | 19    |
| RAB32       | 0.532679233 | 0         | CD8.T             | Th17 cell differentiation                         | 9.40E-05 | CD4/FOS/HLA-DMA/HLA-DMB/HLA-DPA1/HLA-DPB1/HLA-DQA1/HLA-DQB1/HLA-DRA/HLA-DRB1/HLA-DRB5/IFNGR2/IL1B                                                                                                                   | 13    |
| MNDA        | 0.52777589  | 0         | CD8.T             | Influenza A                                       | 9.61E-05 | ACTB/SLC25A5/HLA-DMA/HLA-DMB/HLA-DPA1/HLA-DPB1/HLA-DQA1/HLA-DQB1/HLA-DRA/HLA-DRB1/HLA-DRB5/IFNGR2/IL1B/CXCL8/KPNA2/CCL2/PYCARD                                                                                      | 17    |

|          |             |           |       |                                                            |          |                                                                                                                                                                              |    |
|----------|-------------|-----------|-------|------------------------------------------------------------|----------|------------------------------------------------------------------------------------------------------------------------------------------------------------------------------|----|
| RAB31    | 0.458929955 | 0         | CD8.T | Fluid shear stress and atherosclerosis                     | 9.83E-05 | ACTB/RHOA/CALM2/CALM3/CTSL/FOS/HMOX1/IL1B/MEF2C/MGST3/RAC1/CCL2/SUMO3/TXN/GSTO1                                                                                              | 15 |
| CENPW    | 0.457778274 | 0         | CD8.T | Lipid and atherosclerosis                                  | 0.000183 | RHOA/CALM2/CALM3/CD14/CYBB/FOS/CXCL2/HSPA1A/HSPA1B/HSPD1/IL1B/CXCL8/NCF4/RAC1/CCL2/CCL3L1/SOD2/LY96/PYCARD                                                                   | 19 |
| CEP55    | 0.444897177 | 0         | CD8.T | Chagas disease                                             | 0.000217 | C1QA/C1QB/C1QC/CALR/FOS/GNAI2/GNAS/IFNGR2/IL1B/CXCL8/CCL2/CCL3L1                                                                                                             | 12 |
| MEF2C    | 0.443910161 | 0         | CD8.T | Apoptosis                                                  | 0.000276 | ACTB/PARP1/BIRC5/CTSB/CTSD/CTSH/CTSL/CTSS/CTSF/FOS/LMNB1/TUBA1A/TUBA1B/TUBA1C                                                                                                | 14 |
| LY86     | 0.433262998 | 0         | CD8.T | Cholesterol metabolism                                     | 0.000305 | APOA2/APOC1/APOC2/APOE/TSP0/LIPA/PLTP/NPC2                                                                                                                                   | 8  |
| AURKB    | 0.432794542 | 0         | CD8.T | Human cytomegalovirus infection                            | 0.000328 | RHOA/CALM2/CALM3/CALR/EIF4EBP1/GNAI2/GNAS/GBN2/GNG5/GRB2/IL1B/CXCL8/PTGS2/RAC1/RB1/RHEB/CCL2/CC3L1/GBN4                                                                      | 19 |
| CSF1R    | 0.415847131 | 0         | CD8.T | Alzheimer disease                                          | 0.000405 | SLC25A5/APOE/ATP5PB/ATP5MC3/ATP5PF/ATP5PO/CALM2/CALM3/COX5B/COX8A/CSF1/CYBB/GAPDH/IL1B/NDUFA4/NDUFB1/PSMB3/PTGS2/TUBA1A/COX5A/TUBA1B/TUBB4B/ATP5PD/UQCQR/UQCQR10/TUBA1C/TUBB | 27 |
| IFNGR2   | 0.39163009  | 0         | CD8.T | Fc gamma R-mediated phagocytosis                           | 0.000545 | FCGR2A/FCGR2B/GSN/HCK/MARCKS/PAK1/RAC1/SYK/ARPC5/ARPC3/ARPC1B                                                                                                                | 11 |
| VSIG4    | 0.387784697 | 0         | CD8.T | Epstein-Barr virus infection                               | 0.000699 | CALR/CCNA2/HLA-DMA/HLA-DMB/HLA-DPA1/HLA-DPB1/HLA-DQA1/HLA-DQB1/HLA-DRA/HLA-DRB1/HLA-DRB5/HES1/RBPJ/RAC1/RB1/SYK/IVIM                                                         | 17 |
| CCNA2    | 0.384636712 | 0         | CD8.T | Complement and coagulation cascades                        | 0.000724 | A2M/C1QA/C1QB/C1QC/C5AR1/CD59/SERPINA1/PLAU/PLAUR/VSIG4                                                                                                                      | 10 |
| CDC43    | 0.367691744 | 0         | CD8.T | Legionellosis                                              | 0.000759 | CD14/CXCL2/HSPA1A/HSPA1B/HSPD1/IL1B/CXCL8/PYCARD                                                                                                                             | 8  |
| PLK1     | 0.355535493 | 0         | CD8.T | Yersinia infection                                         | 0.000986 | ACTB/RHOA/CD4/FCGR2A/FOS/IL1B/CXCL8/RAC1/CCL2/ARPC5/ARPC3/ARPC1B/PYCARD                                                                                                      | 13 |
| CENPA    | 0.32828689  | 0         | CD8.T | Huntington disease                                         | 0.001045 | SLC25A5/ATP5PB/ATP5MC3/ATP5PF/ATP5PO/AP2S1/CLTA/COX5B/COX8A/NDUFA4/NDUFB1/PSMB3/SOD2/TUBA1A/COX5A/TUBA1B/TUBB4B/ATP5PD/UQCQR/UQCQR10/TUBA1C/TUBB                             | 22 |
| GNB4     | 0.316046357 | 0         | CD8.T | Drug metabolism - other enzymes                            | 0.001824 | DUT/TYMP/MGST3/NME2/NME4/RRM1/RRM2/TK1/GSTO1                                                                                                                                 | 9  |
| ANLN     | 0.307118708 | 0         | CD8.T | Oocyte meiosis                                             | 0.002072 | CALM2/CALM3/CCNB1/CDK1/CDC20/MAD2L1/PLK1/YWHAH/YWHAH/CCNB2/PTTG1/ANAPC11                                                                                                     | 12 |
| SIRPA    | 0.306590211 | 0         | CD8.T | Glycolysis / Gluconeogenesis                               | 0.002217 | ENO1/GAPDH/PFKL/PGAM1/PGK1/PKM/TP1/AKR1A1                                                                                                                                    | 8  |
| HCK      | 0.292342271 | 0         | CD8.T | Epithelial cell signaling in Helicobacter pylori infection | 0.002932 | ATP6V1B2/ATP6V0B/HBEGF/CXCL2/CXCL8/PAK1/RAC1/ATP6V1F                                                                                                                         | 8  |
| PLD4     | 0.288504968 | 0         | CD8.T | Human immunodeficiency virus 1 infection                   | 0.003078 | CALM2/CALM3/CALR/CCNB1/CD4/CDK1/FOS/GNAI2/GBN2/GNG5/PAK1/RAC1/AP1S2/CCNB2/SAMHD1/GBN4                                                                                        | 16 |
| CD86     | 0.286045856 | 0         | CD8.T | Thermogenesis                                              | 0.003141 | ACTB/ATP5PB/ATP5MC3/ATP5PF/ATP5PO/COX5B/COX8A/GNAS/GRB2/NDUFA4/NDUFB1/RHEB/COX5A/ATP5MF/ATP5PD/UQCQR/UQCQR10                                                                 | 17 |
| LILRB4   | 0.262546297 | 0         | CD8.T | Kaposi sarcoma-associated herpesvirus infection            | 0.003269 | CALM2/CALM3/CD86/FOS/GBN2/GNG5/CXCL2/HCK/CXCL8/PTGS2/RAC1/RB1/SYK/GBN4/ATG3                                                                                                  | 15 |
| DEPDC1   | 0.260796223 | 0         | CD8.T | C-type lectin receptor signaling pathway                   | 0.003373 | RHOA/CALM2/CALM3/FCER1G/IL1B/PAK1/PTGS2/SYK/PYCARD/CLEC7A                                                                                                                    | 10 |
| 1-Mar    | 0.252275499 | 0         | CD8.T | Antifolate resistance                                      | 0.003522 | DHFR/FOLR2/IL1B/TYMS/GGH                                                                                                                                                     | 12 |
| SHCBP1   | 0.270651515 | 5.77E-301 | CD8.T | Gap junction                                               | 0.003524 | CDK1/GNAI2/GNAS/GRB2/TUBA1A/TUBA1B/TUBB4B/TUBA1C/TUBB                                                                                                                        | 9  |
| MS4A7    | 0.862011012 | 1.18E-293 | CD8.T | Glutathione metabolism                                     | 0.003897 | GPX4/IDH2/MGST3/RRM1/RRM2/GSTO1/LAP3                                                                                                                                         | 7  |
| GPR34    | 0.305290225 | 6.12E-293 | CD8.T | Viral carcinogenesis                                       | 0.005229 | ACTN1/RHOA/CCNA2/CDK1/CDC20/GRB2/GSN/RBPJ/PKM/RAC1/RANBP1/RB1/SYK/YWHAH/YWHAH                                                                                                | 15 |
| MPEG1    | 0.35691546  | 9.57E-292 | CD8.T | IL-17 signaling pathway                                    | 0.00547  | CEBPB/FOS/FOSB/CXCL2/IL1B/CXCL8/PTGS2/S100A9/CCL2                                                                                                                            | 9  |
| PRC1     | 0.592718262 | 1.16E-291 | CD8.T | Cell adhesion molecules                                    | 0.00594  | CD4/CD86/CTLA4/HLA-DMA/HLA-DMB/HLA-DPA1/HLA-DPB1/HLA-DQA1/HLA-DQB1/HLA-DRA/HLA-DRB1/HLA-DRB5                                                                                 | 12 |
| LYZ      | 1.764085572 | 5.49E-281 | CD8.T | Tight junction                                             | 0.006268 | ACTB/ACTN1/RHOA/MYL6/PCNA/RAC1/TUBA1A/YBX3/ARPC5/ARPC3/ARPC1B/TUBA1B/TUBA1C                                                                                                  | 13 |
| PLXDC2   | 0.270130297 | 6.89E-281 | CD8.T | Carbon metabolism                                          | 0.006888 | ENO1/GAPDH/IDH2/PFKL/PGAM1/PGK1/PKM/TALDO1/TP1/SDS                                                                                                                           | 10 |
| RRM2     | 0.741486466 | 4.60E-279 | CD8.T | Coronavirus disease - COVID-19                             | 0.00733  | C1QA/C1QB/C1QC/C5AR1/CYBB/HBEGF/FCGR2A/FOS/IL1B/CXCL8/RPLP0/RPS17/CCL2/SYK/NRP1/RPS27L                                                                                       | 16 |
| MS4A6A   | 1.14743787  | 1.03E-274 | CD8.T | Chemokine signaling pathway                                | 0.007384 | RHOA/GNAI2/GBN2/GNG5/GRB2/CXCL2/HCK/CXCL8/PAK1/RAC1/CCL2/CCL3L1/CXCL16/GBN4                                                                                                  | 14 |
| MSR1     | 0.312126454 | 3.87E-273 | CD8.T | Cellular senescence                                        | 0.008482 | SLC25A5/CALM2/CALM3/CCNA2/CCNB1/CDK1/EIF4EBP1/CXCL8/MYBL2/RB1/RHEB/CCNB2                                                                                                     | 12 |
| CLEC7A   | 0.262977233 | 1.34E-272 | CD8.T | Amyotrophic lateral sclerosis                              | 0.008626 | ACTB/ATP5PB/ATP5MC3/ATP5PF/ATP5PO/COX5B/COX8A/NDUFA4/NDUFB1/PFN1/PSMB3/RAC1/TUBA1A/COX5A/ALYR                                                                                | 22 |
| C1orf54  | 0.340298592 | 3.46E-271 | CD8.T | Progesterone-mediated oocyte maturation                    | 0.009251 | EF/TUBA1B/TUBB4B/ATP5PD/UQCQR/UQCQR10/TUBA1C/TUBB                                                                                                                            | 9  |
| ZWINT    | 0.390095863 | 5.51E-271 | CD8.T | NF-kappa B signaling pathway                               | 0.010447 | CCNA2/CCNB1/CDK1/GNAI2/KIF22/MAD2L1/PLK1/CCNB2/ANAPC11                                                                                                                       | 9  |
| RAD51AP1 | 0.368017543 | 5.87E-271 | CD8.T | Toll-like receptor signaling pathway                       | 0.010447 | PARP1/CD14/CXCL2/IL1B/CXCL8/PLAU/PTGS2/SYK/LY96                                                                                                                              | 9  |
| CKAP2L   | 0.290388749 | 1.62E-267 | CD8.T | HIF-1 signaling pathway                                    | 0.013947 | CD14/CD86/FOS/IL1B/CXCL8/RAC1/CCL3L1/SPP1/LY96                                                                                                                               | 9  |
| CD163    | 0.358325709 | 8.94E-267 | CD8.T | Endocytosis                                                | 0.014876 | CYBB/EIF4EBP1/ENO1/GAPDH/HMOX1/IFNGR2/PFKL/PGK1/TIMP1                                                                                                                        | 9  |
| PHACTR1  | 0.524368388 | 5.08E-265 | CD8.T | Pathways of neurodegeneration - multiple diseases          | 0.015607 | RHOA/CAPZA2/AP2S1/CLTA/DAB2/FOLR2/HSPA1A/HSPA1B/SNX2/SNX3/ARPC5/ARPC3/ARPC1B/RAB31/VPS29/VPS35                                                                               | 16 |
| HMGB3    | 0.445064795 | 3.79E-261 | CD8.T | Transcriptional misregulation in cancer                    | 0.01715  | SLC25A5/ATP5PB/ATP5MC3/ATP5PF/ATP5PO/CALM2/CALM3/COX5B/COX8A/CSF1/CYBB/IL1B/NDUFA4/NDUFB1/PSMB3/PTGS2/RAC1/TUBA1A/COX5A/TUBA1B/TUBB4B/ATP5PD/UQCQR/UQCQR10/TUBA1C/TUBB       | 13 |
| PLAU     | 0.437840687 | 6.86E-260 | CD8.T | Bacterial invasion of epithelial cells                     | 0.017804 | CCNA2/CD14/CD86/CDKN2C/CEBPB/CSF1/RTV5/CXCL8/MAF/MEF2C/PLAU/SPI1/BMP2K                                                                                                       | 7  |
| DLGAP5   | 0.31229646  | 1.16E-258 | CD8.T | Mineral absorption                                         | 0.017932 | ACTB/RHOA/CLTA/RAC1/ARPC5/ARPC3/ARPC1B                                                                                                                                       | 6  |
| GRN      | 1.122340711 | 3.04E-252 | CD8.T | Oxytocin signaling pathway                                 | 0.019116 | ATOX1/FTH1/FTL/HMOX1/MT2A/SLC40A1                                                                                                                                            | 11 |
| BMP2K    | 0.404021391 | 5.90E-247 | CD8.T | Non-alcoholic fatty liver disease                          | 0.01996  | ACTB/RHOA/CALM2/CALM3/FOS/GNAI2/GNAS/MEF2C/MYL6/PTGS2/CAMK1                                                                                                                  | 6  |
| TROAP    | 0.277152968 | 4.02E-244 | CD8.T | Circadian entrainment                                      | 0.020039 | COX5B/COX8A/FOS/IL1B/CXCL8/NDUFA4/NDUFB1/RAC1/COX5A/UQCQR/UQCQR10                                                                                                            | 11 |
| TYMS     | 0.917112432 | 5.22E-244 | CD8.T | Estrogen signaling pathway                                 | 0.022745 | CALM2/CALM3/FOS/GNAI2/GNAS/GBN2/GNG5/GBN4                                                                                                                                    | 8  |
| C1QC     | 2.022483758 | 2.92E-243 | CD8.T | Other glycan degradation                                   | 0.023455 | CALM2/CALM3/CTSD/HBEGF/FOS/GNAI2/GNAS/GRB2/HSPA1A/HSPA1B                                                                                                                     | 10 |
| NUSAP1   | 0.921898961 | 1.97E-241 | CD8.T | Necroptosis                                                | 0.023611 | HEXA/HEXB/MAN2B1                                                                                                                                                             | 3  |
| CENPE    | 0.508467424 | 8.75E-241 | CD8.T | Amoebiasis                                                 | 0.026222 | PARP1/SLC25A5/CYBB/FTH1/FTL/GLUL/HMGB1/IFNGR2/IL1B/PPIA/PYCARD                                                                                                               | 11 |
| NRP1     | 0.261106285 | 3.78E-240 | CD8.T | NOD-like receptor signaling pathway                        | 0.027886 | ACTN1/CD14/GNAS/CXCL2/HSPB1/IL1B/CXCL8/PRDX1                                                                                                                                 | 8  |
| CCNB1    | 0.552584392 | 1.53E-239 | CD8.T | Acute myeloid leukemia                                     | 0.029234 | RHOA/CTSB/CYBB/CXCL2/IL1B/CXCL8/CCL2/TXN/YWHAH/NAMPT/GABARAP/PYCARD                                                                                                          | 12 |
| KIF11    | 0.35046072  | 2.92E-239 | CD8.T | Vibrio cholerae infection                                  | 0.029767 | CCNA2/CD14/CSF1R/EIF4EBP1/GRB2/SPI1                                                                                                                                          | 6  |
|          |             |           |       |                                                            |          | ACTB/ATP6V1B2/ATP6V0B/GNAS/ATP6V1F                                                                                                                                           | 5  |



|          |             |           |       |
|----------|-------------|-----------|-------|
| HNMT     | 0.304551301 | 1.63E-231 | CD8.T |
| KIF2C    | 0.266034333 | 3.75E-222 | CD8.T |
| CD4      | 0.496600526 | 1.71E-217 | CD8.T |
| NCAPG    | 0.290271442 | 7.00E-211 | CD8.T |
| CD302    | 0.306851521 | 1.87E-209 | CD8.T |
| CALHM6   | 0.513872458 | 3.01E-209 | CD8.T |
| TACC3    | 0.531990539 | 4.40E-209 | CD8.T |
| LGMN     | 0.767919748 | 6.56E-207 | CD8.T |
| FOLR2    | 0.586364429 | 9.16E-205 | CD8.T |
| ETV5     | 0.250830422 | 1.39E-203 | CD8.T |
| CDCA8    | 0.269175536 | 2.83E-201 | CD8.T |
| MYBL2    | 0.291969439 | 5.71E-199 | CD8.T |
| C1QA     | 2.420101977 | 7.84E-195 | CD8.T |
| PLTP     | 0.363388671 | 8.29E-195 | CD8.T |
| KNL1     | 0.315246395 | 4.55E-190 | CD8.T |
| C1QB     | 2.538814307 | 4.92E-190 | CD8.T |
| MRC1     | 0.376662949 | 1.94E-189 | CD8.T |
| CTSB     | 1.79835627  | 4.47E-189 | CD8.T |
| NUF2     | 0.357816471 | 7.90E-188 | CD8.T |
| LY96     | 0.287884794 | 9.33E-183 | CD8.T |
| ZFH3     | 0.25316457  | 4.96E-182 | CD8.T |
| CCDC88A  | 0.639492175 | 4.02E-179 | CD8.T |
| ACTN1    | 0.285955596 | 1.06E-178 | CD8.T |
| KIFC1    | 0.315013481 | 1.05E-177 | CD8.T |
| CTSL     | 0.574128444 | 1.94E-173 | CD8.T |
| GPNMB    | 0.481073664 | 2.78E-171 | CD8.T |
| NCAPH    | 0.254714588 | 7.43E-171 | CD8.T |
| RACGAP1  | 0.290981952 | 3.35E-168 | CD8.T |
| FCGRT    | 0.942604968 | 1.01E-165 | CD8.T |
| CENPU    | 0.263299453 | 1.50E-164 | CD8.T |
| NCAPD2   | 0.358485598 | 5.76E-163 | CD8.T |
| IFI30    | 1.298807557 | 1.06E-162 | CD8.T |
| CXCL16   | 0.403672978 | 4.73E-162 | CD8.T |
| SGO2     | 0.372679919 | 4.02E-158 | CD8.T |
| DAB2     | 0.933786176 | 2.07E-157 | CD8.T |
| CENPM    | 0.550868867 | 6.77E-157 | CD8.T |
| DPYSL2   | 0.324045358 | 5.92E-154 | CD8.T |
| SPINT2   | 0.284389024 | 4.07E-152 | CD8.T |
| NCF4     | 0.340746738 | 1.21E-149 | CD8.T |
| BASP1    | 0.435689779 | 1.26E-147 | CD8.T |
| CST3     | 3.065432464 | 1.75E-147 | CD8.T |
| ASF1B    | 0.250463417 | 1.15E-146 | CD8.T |
| CYFIP1   | 0.26884247  | 1.22E-141 | CD8.T |
| CTSZ     | 1.25752626  | 3.73E-139 | CD8.T |
| TNFAIP2  | 0.353910797 | 9.89E-139 | CD8.T |
| DTYMK    | 0.517156025 | 3.36E-133 | CD8.T |
| CKS1B    | 0.720248474 | 6.79E-132 | CD8.T |
| RNASE1   | 1.945643497 | 2.22E-129 | CD8.T |
| SLC43A3  | 0.316487055 | 2.31E-128 | CD8.T |
| GSN      | 0.682534819 | 4.09E-128 | CD8.T |
| HBEGF    | 0.290776587 | 3.21E-125 | CD8.T |
| TUBA1C   | 1.093430606 | 6.37E-125 | CD8.T |
| KLF4     | 0.322233264 | 9.60E-124 | CD8.T |
| SLC40A1  | 0.704127664 | 1.37E-122 | CD8.T |
| NPC2     | 1.631792146 | 3.96E-122 | CD8.T |
| HIST1H1B | 0.412474378 | 2.37E-121 | CD8.T |
| NDC80    | 0.271300781 | 1.82E-115 | CD8.T |
| CLSPN    | 0.385476821 | 2.29E-115 | CD8.T |
| PTGS2    | 0.364702643 | 1.69E-114 | CD8.T |
| STMN1    | 1.605778509 | 4.49E-112 | CD8.T |
| SYK      | 0.347010739 | 8.25E-112 | CD8.T |
| TTYH3    | 0.367573945 | 1.89E-110 | CD8.T |
| OGFRL1   | 0.396422028 | 3.52E-110 | CD8.T |
| IL1RN    | 0.364337012 | 2.27E-109 | CD8.T |

p53 signaling pathway

0.042012

CCNB1/CDK1/RRM2/CCNB2/SIVA1/GTSE1

6

|          |             |           |       |
|----------|-------------|-----------|-------|
| PPT1     | 0.576891886 | 8.54E-109 | CD8.T |
| CREG1    | 0.504384037 | 9.52E-109 | CD8.T |
| HLA-DRA  | 2.564609109 | 2.64E-108 | CD8.T |
| SMC2     | 0.455390695 | 9.78E-108 | CD8.T |
| TUBB     | 2.046738122 | 3.41E-106 | CD8.T |
| HLA-DMB  | 0.509518288 | 6.64E-106 | CD8.T |
| SAC3D1   | 0.301101662 | 1.13E-105 | CD8.T |
| A2M      | 0.6514671   | 4.13E-105 | CD8.T |
| RNF130   | 0.482197169 | 1.25E-103 | CD8.T |
| FCGBP    | 0.686699158 | 2.03E-103 | CD8.T |
| PLAUR    | 0.720317524 | 2.53E-103 | CD8.T |
| FCGR2B   | 0.253543148 | 1.18E-102 | CD8.T |
| TUBA1B   | 2.234167184 | 3.90E-102 | CD8.T |
| CTSH     | 0.462709319 | 8.99E-101 | CD8.T |
| MAD2L1   | 0.315294411 | 5.47E-99  | CD8.T |
| ANXA5    | 0.829366562 | 3.34E-97  | CD8.T |
| GGH      | 0.250460292 | 3.32E-96  | CD8.T |
| UBE2T    | 0.297888625 | 7.32E-96  | CD8.T |
| RGS10    | 0.796646739 | 7.62E-96  | CD8.T |
| HLA-DMA  | 1.008693276 | 1.94E-95  | CD8.T |
| PSAP     | 1.608086783 | 2.09E-94  | CD8.T |
| C5AR1    | 0.272739229 | 1.94E-92  | CD8.T |
| SPP1     | 2.376907064 | 2.58E-90  | CD8.T |
| SMC4     | 0.661075223 | 3.22E-90  | CD8.T |
| CCL2     | 1.099477205 | 6.98E-90  | CD8.T |
| PAK1     | 0.330824641 | 8.88E-90  | CD8.T |
| HMGB2    | 1.319154657 | 3.70E-89  | CD8.T |
| CAMK1    | 0.292189417 | 3.83E-89  | CD8.T |
| HMG2     | 1.388880843 | 1.34E-88  | CD8.T |
| KIF20B   | 0.403222405 | 3.42E-88  | CD8.T |
| RAC1     | 0.920679088 | 7.67E-88  | CD8.T |
| CAPG     | 0.883083642 | 8.91E-88  | CD8.T |
| DHFR     | 0.333102364 | 8.06E-86  | CD8.T |
| SELENOP  | 1.48090328  | 2.08E-82  | CD8.T |
| CD74     | 2.400020792 | 7.53E-82  | CD8.T |
| SGK1     | 0.783547539 | 1.63E-80  | CD8.T |
| HLA-DPA1 | 1.745049168 | 9.86E-80  | CD8.T |
| COTL1    | 0.922791282 | 1.54E-78  | CD8.T |
| YWHAH    | 0.75856524  | 7.74E-78  | CD8.T |
| BRI3     | 0.824028777 | 2.83E-77  | CD8.T |
| LGALS3   | 0.849378938 | 6.73E-77  | CD8.T |
| HMOX1    | 0.480833695 | 7.84E-77  | CD8.T |
| LGALS9   | 0.378596703 | 3.67E-75  | CD8.T |
| GABARAP  | 0.800350305 | 1.39E-74  | CD8.T |
| TMEM14C  | 0.48178297  | 2.35E-71  | CD8.T |
| HLA-DQA1 | 1.208068408 | 2.95E-71  | CD8.T |
| VIM      | 1.049761004 | 1.71E-70  | CD8.T |
| FTL      | 1.840904655 | 2.34E-69  | CD8.T |
| PTTG1    | 0.851778371 | 7.65E-69  | CD8.T |
| CKAP5    | 0.302157102 | 1.34E-68  | CD8.T |
| HMGB1    | 0.903584355 | 2.24E-68  | CD8.T |
| AP2S1    | 0.786426494 | 5.66E-68  | CD8.T |
| SDS      | 0.375770596 | 1.32E-67  | CD8.T |
| MFSD1    | 0.312128186 | 1.38E-67  | CD8.T |
| NUDT1    | 0.503652104 | 9.37E-67  | CD8.T |
| IL1B     | 0.937040745 | 2.76E-65  | CD8.T |
| PRDX3    | 0.41246447  | 3.50E-65  | CD8.T |
| GAPDH    | 1.050301023 | 1.20E-64  | CD8.T |
| HLA-DRB1 | 1.771448634 | 1.37E-64  | CD8.T |
| YBX1     | 0.752909689 | 2.09E-62  | CD8.T |
| BLVRB    | 0.627737837 | 2.95E-60  | CD8.T |
| H2AFY    | 0.585599451 | 2.14E-59  | CD8.T |
| CDK2AP1  | 0.315541653 | 4.24E-59  | CD8.T |
| HES1     | 0.251275787 | 1.39E-58  | CD8.T |

|          |             |          |       |
|----------|-------------|----------|-------|
| APOE     | 2.127502149 | 1.41E-58 | CD8.T |
| NUCKS1   | 0.767705437 | 1.58E-57 | CD8.T |
| FGL2     | 0.638961351 | 3.16E-57 | CD8.T |
| CALM3    | 0.80930693  | 4.28E-57 | CD8.T |
| GNAS     | 0.563263477 | 1.44E-56 | CD8.T |
| H2AFV    | 0.825101511 | 2.36E-56 | CD8.T |
| TYMP     | 0.677080332 | 3.88E-56 | CD8.T |
| CKAP2    | 0.406003083 | 2.15E-55 | CD8.T |
| CD9      | 0.299754937 | 5.24E-55 | CD8.T |
| HLA-DPB1 | 1.417471841 | 2.78E-54 | CD8.T |
| FTH1     | 0.756999462 | 1.81E-53 | CD8.T |
| RASSF4   | 0.273803455 | 3.42E-53 | CD8.T |
| EIF4EBP1 | 0.308618191 | 3.65E-53 | CD8.T |
| ANP32B   | 0.658975861 | 6.13E-52 | CD8.T |
| S100A9   | 0.42330329  | 4.85E-51 | CD8.T |
| KIF22    | 0.322462371 | 6.87E-51 | CD8.T |
| C1orf162 | 0.499197298 | 2.41E-50 | CD8.T |
| CDKN2C   | 0.305127515 | 4.51E-49 | CD8.T |
| PYCARD   | 0.579455759 | 1.16E-48 | CD8.T |
| PKM      | 0.794328037 | 1.19E-48 | CD8.T |
| S100A11  | 0.982260203 | 1.29E-48 | CD8.T |
| HSBP1    | 0.430940461 | 2.23E-48 | CD8.T |
| TMEM106C | 0.368109723 | 2.76E-48 | CD8.T |
| NAGK     | 0.33544738  | 3.84E-48 | CD8.T |
| TMPO     | 0.516762563 | 3.97E-48 | CD8.T |
| PLD3     | 0.552049081 | 3.16E-47 | CD8.T |
| COX8A    | 0.529425277 | 4.30E-47 | CD8.T |
| SKA2     | 0.317667767 | 6.37E-47 | CD8.T |
| LAP3     | 0.364196928 | 9.39E-47 | CD8.T |
| ACTB     | 0.783595789 | 1.65E-46 | CD8.T |
| SNRNP25  | 0.270065593 | 1.65E-46 | CD8.T |
| NGG5     | 0.565980876 | 2.32E-46 | CD8.T |
| PFKL     | 0.268344005 | 2.79E-46 | CD8.T |
| PHF19    | 0.357856193 | 3.72E-46 | CD8.T |
| H2AFZ    | 0.757742923 | 1.80E-45 | CD8.T |
| SOD2     | 0.79170054  | 2.02E-45 | CD8.T |
| TIMP1    | 0.530778116 | 3.02E-45 | CD8.T |
| LST1     | 0.472478718 | 4.05E-45 | CD8.T |
| APOC1    | 1.471255448 | 4.38E-45 | CD8.T |
| DUSP4    | 0.982734888 | 1.03E-44 | CD8.T |
| MAN2B1   | 0.287022848 | 1.51E-44 | CD8.T |
| CENPK    | 0.280927421 | 1.92E-44 | CD8.T |
| ANAPC11  | 0.564261534 | 2.57E-44 | CD8.T |
| PRDX1    | 0.604171618 | 6.74E-44 | CD8.T |
| TPP1     | 0.303551677 | 4.90E-43 | CD8.T |
| CD59     | 0.343117646 | 1.05E-42 | CD8.T |
| NFIC     | 0.280423817 | 1.30E-42 | CD8.T |
| GPR183   | 0.606883112 | 1.89E-42 | CD8.T |
| LSM5     | 0.36821758  | 2.35E-42 | CD8.T |
| IER3     | 1.057844826 | 7.05E-42 | CD8.T |
| ENO1     | 0.670511559 | 9.90E-41 | CD8.T |
| C15orf48 | 0.39591345  | 1.32E-39 | CD8.T |
| HEXB     | 0.28402359  | 6.81E-39 | CD8.T |
| NENF     | 0.375546446 | 9.73E-39 | CD8.T |
| FABP5    | 0.906965179 | 1.23E-38 | CD8.T |
| SAMHD1   | 0.50533259  | 2.13E-38 | CD8.T |
| RRM1     | 0.27616296  | 7.01E-38 | CD8.T |
| ATP6V1B2 | 0.264157526 | 7.34E-38 | CD8.T |
| AP1S2    | 0.389321305 | 8.06E-38 | CD8.T |
| DNPH1    | 0.372497898 | 8.48E-38 | CD8.T |
| DBNDD2   | 0.257962353 | 1.47E-37 | CD8.T |
| GNAI2    | 0.538632792 | 1.82E-37 | CD8.T |
| SPATS2L  | 0.28957925  | 3.17E-37 | CD8.T |
| YWHAE    | 0.423532956 | 3.48E-37 | CD8.T |

|          |             |          |       |
|----------|-------------|----------|-------|
| CIAO2A   | 0.295043208 | 5.84E-37 | CD8.T |
| LGALS1   | 1.25415321  | 1.27E-36 | CD8.T |
| CXCL2    | 0.560919552 | 1.68E-36 | CD8.T |
| DEK      | 0.64838259  | 1.68E-36 | CD8.T |
| TALDO1   | 0.436237619 | 2.70E-36 | CD8.T |
| LIPA     | 0.519162113 | 3.94E-36 | CD8.T |
| FAM111A  | 0.392740726 | 7.58E-36 | CD8.T |
| FKBP1A   | 0.423635126 | 1.68E-35 | CD8.T |
| CORO1B   | 0.459197777 | 2.14E-35 | CD8.T |
| ATAD2    | 0.34905028  | 2.39E-35 | CD8.T |
| HLA-DQB1 | 1.161623948 | 2.73E-35 | CD8.T |
| HLA-DRB5 | 1.567678011 | 3.60E-35 | CD8.T |
| LAPTM5   | 0.607704868 | 5.25E-35 | CD8.T |
| ARL6IP1  | 0.775687681 | 7.04E-35 | CD8.T |
| AKR1A1   | 0.364698465 | 1.24E-34 | CD8.T |
| HSPB1    | 0.613200356 | 1.47E-34 | CD8.T |
| ATP5MF   | 0.434434696 | 6.70E-34 | CD8.T |
| NME4     | 0.275976198 | 1.15E-33 | CD8.T |
| SAT1     | 0.852762717 | 1.19E-33 | CD8.T |
| VAMP8    | 0.503112018 | 1.48E-33 | CD8.T |
| LMNB1    | 0.281467259 | 3.19E-33 | CD8.T |
| MZT2B    | 0.442489177 | 3.39E-33 | CD8.T |
| RHOA     | 0.467949016 | 4.79E-33 | CD8.T |
| ANXA2    | 0.586704805 | 9.41E-33 | CD8.T |
| G0S2     | 0.752622959 | 9.44E-33 | CD8.T |
| PTTG1IP  | 0.280246354 | 1.15E-32 | CD8.T |
| ATOX1    | 0.332147197 | 2.01E-32 | CD8.T |
| VPS35    | 0.269691579 | 2.57E-32 | CD8.T |
| C20orf27 | 0.257323884 | 2.89E-32 | CD8.T |
| LAIR1    | 0.300494463 | 3.80E-32 | CD8.T |
| UQCC2    | 0.321989828 | 5.12E-32 | CD8.T |
| RB1      | 0.272501475 | 7.23E-32 | CD8.T |
| LIMS1    | 0.359057855 | 7.71E-32 | CD8.T |
| UQCRCQ   | 0.417912139 | 1.10E-31 | CD8.T |
| LSM4     | 0.384644209 | 4.58E-31 | CD8.T |
| COX5A    | 0.443423043 | 5.45E-31 | CD8.T |
| TMEM176B | 0.291793799 | 1.01E-30 | CD8.T |
| HSPA1B   | 0.446202365 | 1.14E-30 | CD8.T |
| COMMD4   | 0.274045699 | 1.89E-30 | CD8.T |
| BLOC1S1  | 0.428916735 | 2.52E-30 | CD8.T |
| ZYX      | 0.392309366 | 2.78E-30 | CD8.T |
| ATP6V0B  | 0.473750175 | 8.20E-30 | CD8.T |
| MIS18BP1 | 0.354765364 | 3.19E-29 | CD8.T |
| GLUL     | 0.509446748 | 6.27E-29 | CD8.T |
| YBX3     | 0.283372201 | 1.39E-28 | CD8.T |
| CTLA4    | 0.544513093 | 4.28E-28 | CD8.T |
| SERF2    | 0.349696311 | 1.02E-27 | CD8.T |
| RAN      | 0.458591254 | 1.52E-27 | CD8.T |
| GSTO1    | 0.408139604 | 1.75E-27 | CD8.T |
| KPNA2    | 0.519607762 | 2.76E-27 | CD8.T |
| PCNA     | 0.532842447 | 5.91E-27 | CD8.T |
| CTSS     | 0.617989593 | 9.93E-27 | CD8.T |
| HIST1H4C | 1.449753655 | 1.01E-26 | CD8.T |
| PPIA     | 0.460294501 | 1.40E-26 | CD8.T |
| SERPINA1 | 0.504107051 | 1.47E-26 | CD8.T |
| CD84     | 0.260522804 | 5.67E-26 | CD8.T |
| ARPC5    | 0.43965626  | 6.90E-26 | CD8.T |
| CSTB     | 0.54280401  | 7.14E-26 | CD8.T |
| APLP2    | 0.429894848 | 1.34E-25 | CD8.T |
| CAPZA2   | 0.283429999 | 2.08E-25 | CD8.T |
| RAD21    | 0.361750775 | 3.36E-25 | CD8.T |
| CNTRL    | 0.268543473 | 3.62E-25 | CD8.T |
| IDH2     | 0.383266213 | 4.27E-25 | CD8.T |
| NME2     | 0.518719228 | 5.33E-25 | CD8.T |

|          |             |          |       |
|----------|-------------|----------|-------|
| RPA3     | 0.341119075 | 7.12E-25 | CD8.T |
| RNASET2  | 0.485188524 | 9.81E-25 | CD8.T |
| IFITM3   | 0.486826789 | 1.83E-24 | CD8.T |
| SOX4     | 0.282153074 | 2.03E-24 | CD8.T |
| H2AFX    | 0.393081074 | 2.35E-24 | CD8.T |
| CLTA     | 0.418641131 | 3.80E-24 | CD8.T |
| DUT      | 0.559157157 | 1.70E-23 | CD8.T |
| VMA21    | 0.254031555 | 2.07E-23 | CD8.T |
| MRPL23   | 0.252571227 | 4.71E-23 | CD8.T |
| MYL6     | 0.355240332 | 7.59E-23 | CD8.T |
| DDX39A   | 0.310922158 | 9.93E-23 | CD8.T |
| ATP5PD   | 0.348123557 | 1.02E-22 | CD8.T |
| ATG3     | 0.331713721 | 1.26E-22 | CD8.T |
| HSPA1A   | 0.462548654 | 1.27E-22 | CD8.T |
| SNX2     | 0.252756058 | 1.85E-22 | CD8.T |
| ATF3     | 0.491645874 | 2.34E-22 | CD8.T |
| CXCL8    | 0.82918165  | 2.58E-22 | CD8.T |
| SLC25A5  | 0.431147137 | 3.16E-22 | CD8.T |
| CALM2    | 0.377688067 | 4.08E-22 | CD8.T |
| RHEB     | 0.369444631 | 6.46E-22 | CD8.T |
| RPLP0    | 0.337057418 | 1.09E-21 | CD8.T |
| CKS2     | 0.40478321  | 1.12E-21 | CD8.T |
| APOA2    | 0.617797553 | 1.24E-21 | CD8.T |
| ATP5PF   | 0.322031103 | 1.34E-21 | CD8.T |
| GPX4     | 0.380767732 | 1.61E-21 | CD8.T |
| PTMS     | 0.422702577 | 1.82E-21 | CD8.T |
| GRB2     | 0.307281212 | 2.04E-21 | CD8.T |
| PARP1    | 0.337775664 | 2.22E-21 | CD8.T |
| DNAJA4   | 0.373064513 | 2.70E-21 | CD8.T |
| ARPC3    | 0.399409716 | 4.62E-21 | CD8.T |
| NAP1L1   | 0.414206966 | 4.97E-21 | CD8.T |
| H3F3A    | 0.393855754 | 5.68E-21 | CD8.T |
| TXNDC17  | 0.286750943 | 5.82E-21 | CD8.T |
| SNRPD1   | 0.307502508 | 8.48E-21 | CD8.T |
| SIVA1    | 0.398096133 | 1.51E-20 | CD8.T |
| SUMO3    | 0.266055738 | 1.72E-20 | CD8.T |
| CTSD     | 1.077061399 | 1.91E-20 | CD8.T |
| RHOB     | 0.389781696 | 2.45E-20 | CD8.T |
| ARHGAP18 | 0.282604466 | 2.60E-20 | CD8.T |
| RANBP1   | 0.437590138 | 1.05E-19 | CD8.T |
| GDI2     | 0.32285741  | 1.21E-19 | CD8.T |
| DCK      | 0.251387123 | 1.38E-19 | CD8.T |
| ARPC1B   | 0.412236058 | 2.23E-19 | CD8.T |
| CCL3L1   | 1.363125466 | 2.28E-19 | CD8.T |
| RBPJ     | 0.259648312 | 2.33E-19 | CD8.T |
| MRPL51   | 0.313172927 | 2.81E-19 | CD8.T |
| MCM7     | 0.284778575 | 5.03E-19 | CD8.T |
| TMSB10   | 0.383064222 | 7.16E-19 | CD8.T |
| POMP     | 0.355957646 | 7.73E-19 | CD8.T |
| SNX3     | 0.517891525 | 9.17E-19 | CD8.T |
| TPM3     | 0.307008615 | 1.32E-18 | CD8.T |
| JPT1     | 0.543674333 | 1.35E-18 | CD8.T |
| VPS29    | 0.327015259 | 1.75E-18 | CD8.T |
| UQCRC10  | 0.303884659 | 1.86E-18 | CD8.T |
| MGST3    | 0.32001468  | 5.37E-18 | CD8.T |
| LAMTOR2  | 0.255202532 | 5.54E-18 | CD8.T |
| NAMPT    | 0.400670921 | 7.55E-18 | CD8.T |
| COX5B    | 0.282792629 | 1.22E-17 | CD8.T |
| RPS17    | 0.317462383 | 2.25E-17 | CD8.T |
| NDUFB1   | 0.336346232 | 4.18E-17 | CD8.T |
| BAG3     | 0.5035699   | 5.65E-17 | CD8.T |
| HMGA1    | 0.279363549 | 6.35E-17 | CD8.T |
| GEM      | 0.252211815 | 6.98E-17 | CD8.T |
| CEBPB    | 0.584727496 | 1.36E-16 | CD8.T |

|          |             |            |       |
|----------|-------------|------------|-------|
| CNPY3    | 0.278032215 | 1.59E-16   | CD8.T |
| CKLF     | 0.331650795 | 1.66E-16   | CD8.T |
| H1FX     | 0.330550673 | 2.69E-16   | CD8.T |
| ATP5PB   | 0.281304646 | 5.19E-16   | CD8.T |
| APOC2    | 0.595397976 | 6.57E-16   | CD8.T |
| TUBA1A   | 0.418400577 | 6.78E-16   | CD8.T |
| ATP5MC3  | 0.310384634 | 9.39E-16   | CD8.T |
| TXN      | 0.336992356 | 1.18E-15   | CD8.T |
| ALYREF   | 0.304246299 | 1.79E-15   | CD8.T |
| CARHSP1  | 0.273909883 | 2.65E-15   | CD8.T |
| LSM3     | 0.26048121  | 3.37E-15   | CD8.T |
| AKR1B1   | 0.273884975 | 3.98E-15   | CD8.T |
| TUBB4B   | 0.394450098 | 4.63E-15   | CD8.T |
| PCBP2    | 0.29481761  | 7.20E-15   | CD8.T |
| RPS27L   | 0.301055596 | 8.12E-15   | CD8.T |
| ATP6V1F  | 0.386826644 | 8.78E-15   | CD8.T |
| CANX     | 0.305407366 | 9.45E-15   | CD8.T |
| BANF1    | 0.293143373 | 1.08E-14   | CD8.T |
| ASAH1    | 0.37537465  | 1.34E-14   | CD8.T |
| ANP32E   | 0.291905484 | 2.12E-14   | CD8.T |
| CBX3     | 0.250828351 | 2.80E-14   | CD8.T |
| TRAPPC5  | 0.271448988 | 3.25E-14   | CD8.T |
| P4HB     | 0.321872174 | 3.73E-14   | CD8.T |
| UCP2     | 0.340185646 | 4.03E-14   | CD8.T |
| DDT      | 0.261702418 | 4.12E-14   | CD8.T |
| HEXA     | 0.265780879 | 4.40E-14   | CD8.T |
| DNMT1    | 0.296422943 | 9.68E-14   | CD8.T |
| ATP5PO   | 0.293865141 | 1.06E-13   | CD8.T |
| MICOS10  | 0.32064298  | 1.50E-13   | CD8.T |
| GNB2     | 0.293192284 | 2.05E-13   | CD8.T |
| TPI1     | 0.440814564 | 5.52E-13   | CD8.T |
| MRPL18   | 0.253429719 | 1.49E-12   | CD8.T |
| LAMTOR4  | 0.262091985 | 1.54E-12   | CD8.T |
| FOS      | 0.552243423 | 2.55E-12   | CD8.T |
| XRCC6    | 0.251132305 | 9.51E-12   | CD8.T |
| PFN1     | 0.331958118 | 1.29E-11   | CD8.T |
| MAF      | 0.380994334 | 1.97E-11   | CD8.T |
| FCER1G   | 0.514615562 | 7.85E-11   | CD8.T |
| WSB1     | 0.317082674 | 1.89E-10   | CD8.T |
| FOSB     | 0.469289784 | 3.01E-10   | CD8.T |
| NDUFA4   | 0.266127875 | 3.48E-10   | CD8.T |
| UBE2S    | 0.355363174 | 1.18E-09   | CD8.T |
| TSPO     | 0.289944231 | 1.32E-09   | CD8.T |
| CD83     | 0.44866136  | 1.85E-09   | CD8.T |
| DBI      | 0.264818981 | 1.85E-09   | CD8.T |
| PPP1R15A | 0.334743679 | 2.21E-09   | CD8.T |
| HP1BP3   | 0.270055476 | 2.29E-09   | CD8.T |
| PSMB3    | 0.262162569 | 3.02E-09   | CD8.T |
| CSF1     | 0.441989003 | 1.15E-08   | CD8.T |
| KLF6     | 0.408821033 | 1.53E-08   | CD8.T |
| HMGN1    | 0.251692985 | 3.15E-08   | CD8.T |
| HERPUD1  | 0.250979037 | 1.04E-07   | CD8.T |
| RNH1     | 0.254901031 | 1.05E-07   | CD8.T |
| PLP2     | 0.255310579 | 5.76E-07   | CD8.T |
| MT-ND1   | 0.283127805 | 7.80E-07   | CD8.T |
| MIF      | 0.360356698 | 2.03E-06   | CD8.T |
| PGAM1    | 0.263291226 | 5.60E-06   | CD8.T |
| PGK1     | 0.307075934 | 7.99E-06   | CD8.T |
| CALR     | 0.280180418 | 1.21E-05   | CD8.T |
| HSPD1    | 0.314080633 | 2.99E-05   | CD8.T |
| MT2A     | 0.750920423 | 4.33E-05   | CD8.T |
| HSPH1    | 0.388408526 | 7.39E-05   | CD8.T |
| CACYBP   | 0.265665443 | 0.00216586 | CD8.T |
| TYROBP   | 0.613525108 | 0.00277586 | CD8.T |

---

## b. Cyto CD8.T

| Gene symbol | avg_log2FC  | p_val_adj | Upregulated group | Description                                                   | pvalue   | geneID                                                                                                                                                                                                  | Count |
|-------------|-------------|-----------|-------------------|---------------------------------------------------------------|----------|---------------------------------------------------------------------------------------------------------------------------------------------------------------------------------------------------------|-------|
| KLRB1       | 1.409517471 | 0         | Cyto_CD8.T        | Coronavirus disease - COVID-19                                | 2.56E-24 | JAK1/NFKB1/NFKBIA/PIK3R1/RPL3/RPL5/RPL10/RPL11/RPL13/RPL17/RPL21/RPL23A/RPL30/RPL27A/RPL32/RPL34/RPL37A/RPL39/RPL41/RPS3/RPS3A/RPS6/RPS10/RPS12/RPS14/RPS18/RPS21/RPS26/RPS27/RPS27A/RPS29/RPL14/RPL13A | 34    |
| GZMM        | 0.905311179 | 1.36E-300 | Cyto_CD8.T        | Ribosome                                                      | 1.32E-23 | RPL3/RPL5/RPL10/RPL11/RPL13/RPL17/RPL21/RPL23A/RPL30/RPL27A/RPL32/RPL34/RPL37A/RPL39/RPL41/RPS3/RPS3A/RPS6/RPS10/RPS12/RPS14/RPS18/RPS21/RPS26/RPS27/RPS27A/RPS29/RPL14/RPL13A                          | 29    |
| REL         | 1.130444916 | 1.53E-262 | Cyto_CD8.T        | Natural killer cell mediated cytotoxicity                     | 1.44E-11 | CD247/CD48/FCER1G/FCGR3A/FYN/HLA-B/HLA-E/IFNGR1/KLRC1/KLRC3/KLRD1/PIK3R1/PRF1/TNF/TYROBP/HCST/NCR3                                                                                                      | 17    |
| RPS27A      | 0.456533439 | 1.63E-243 | Cyto_CD8.T        | Osteoclast differentiation                                    | 8.42E-08 | FCGR3A/FOSL2/FYN/IFNGR1/JAK1/JUNB/NFKB1/NFKBIA/PIK3R1/RELB/TGFB1/TNF/TYROBP                                                                                                                             | 13    |
| RPL3        | 0.631210347 | 5.38E-232 | Cyto_CD8.T        | NF-kappa B signaling pathway                                  | 5.82E-07 | BIRC3/BCL2A1/LTB/GADD45B/NFKB1/NFKBIA/RELB/CCL4/TNF/TNFAIP3/TNFSF14                                                                                                                                     | 11    |
| RPS3        | 0.469516436 | 4.03E-220 | Cyto_CD8.T        | Graft-versus-host disease                                     | 4.32E-05 | HLA-B/HLA-E/KLRC1/KLRD1/PRF1/TNF                                                                                                                                                                        | 6     |
| XCL2        | 1.603762493 | 2.04E-218 | Cyto_CD8.T        | Apoptosis                                                     | 4.97E-05 | BIRC3/BCL2A1/CTSW/ERN1/GADD45B/NFKB1/NFKBIA/PIK3R1/PRF1/TNF                                                                                                                                             | 10    |
| RPL10       | 0.430603778 | 2.45E-217 | Cyto_CD8.T        | TNF signaling pathway                                         | 6.00E-05 | BIRC3/MAP3K8/IRF1/JUNB/NFKB1/NFKBIA/PIK3R1/TNF/TNFAIP3                                                                                                                                                  | 9     |
| DUSP2       | 0.846139467 | 1.46E-193 | Cyto_CD8.T        | Epstein-Barr virus infection                                  | 7.15E-05 | RUNX3/CD247/HLA-B/HLA-E/JAK1/GADD45B/NFKB1/NFKBIA/PIK3R1/RELB/TNF/TNFAIP3                                                                                                                               | 12    |
| KLRF1       | 0.813367301 | 2.14E-178 | Cyto_CD8.T        | Leishmaniasis                                                 | 0.000189 | FCGR3A/IFNGR1/JAK1/NFKB1/NFKBIA/TGFB1/TNF                                                                                                                                                               | 7     |
| BTG1        | 0.673146955 | 4.76E-177 | Cyto_CD8.T        | Human cytomegalovirus infection                               | 0.000199 | CALM1/HLA-B/HLA-E/JAK1/NFKB1/NFKBIA/PIK3R1/PTGER4/CCL4/TNF/CXCR4/GNG2                                                                                                                                   | 12    |
| PLAC8       | 0.691784827 | 1.02E-172 | Cyto_CD8.T        | C-type lectin receptor signaling pathway                      | 0.000212 | CALM1/FCER1G/IRF1/NFKB1/NFKBIA/PIK3R1/RELB/TNF                                                                                                                                                          | 8     |
| RORA        | 0.703322731 | 1.40E-171 | Cyto_CD8.T        | T cell receptor signaling pathway                             | 0.000212 | CD247/MAP3K8/FYN/NFKB1/NFKBIA/PIK3R1/PTPRC/TNF                                                                                                                                                          | 8     |
| RPL34       | 0.441759228 | 1.27E-169 | Cyto_CD8.T        | Kaposi sarcoma-associated herpesvirus infection               | 0.000218 | CALM1/HLA-B/HLA-E/IFNGR1/JAK1/NFKB1/NFKBIA/PIK3R1/RPS27A/ZFP36/GNG2                                                                                                                                     | 11    |
| IER2        | 0.692840002 | 9.20E-169 | Cyto_CD8.T        | PD-L1 expression and PD-1 checkpoint pathway in cancer        | 0.000464 | CD247/IFNGR1/JAK1/NFKB1/NFKBIA/PIK3R1/EML4                                                                                                                                                              | 7     |
| CD69        | 0.945822323 | 8.26E-167 | Cyto_CD8.T        | Inflammatory bowel disease                                    | 0.000507 | IFNGR1/NFKB1/RORA/STAT4/TGFB1/TNF                                                                                                                                                                       | 6     |
| CST7        | 0.656055003 | 1.29E-164 | Cyto_CD8.T        | Th1 and Th2 cell differentiation                              | 0.000568 | RUNX3/CD247/IFNGR1/JAK1/NFKB1/NFKBIA/STAT4                                                                                                                                                              | 7     |
| TRDC        | 0.917620929 | 8.27E-164 | Cyto_CD8.T        | Hepatitis B                                                   | 0.000958 | DDX3X/JAK1/NFKB1/NFKBIA/PIK3R1/STAT4/TGFB1/TNF/YWHAZ                                                                                                                                                    | 9     |
| RPS27       | 0.423592256 | 8.64E-163 | Cyto_CD8.T        | Chagas disease                                                | 0.001052 | CD247/IFNGR1/NFKB1/NFKBIA/PIK3R1/TGFB1/TNF                                                                                                                                                              | 7     |
| RPL30       | 0.377379853 | 9.38E-162 | Cyto_CD8.T        | Antigen processing and presentation                           | 0.001337 | HLA-B/HLA-E/KLRC1/KLRC3/KLRD1/TNF                                                                                                                                                                       | 6     |
| MATK        | 0.572821786 | 1.70E-160 | Cyto_CD8.T        | Th17 cell differentiation                                     | 0.00147  | CD247/IFNGR1/JAK1/NFKB1/NFKBIA/RORA/TGFB1                                                                                                                                                               | 7     |
| RPS29       | 0.490069975 | 1.72E-158 | Cyto_CD8.T        | Human immunodeficiency virus 1 infection                      | 0.001752 | CALM1/CD247/HLA-B/HLA-E/NFKB1/NFKBIA/PIK3R1/TNF/CXCR4/GNG2                                                                                                                                              | 10    |
| NCR3        | 0.673076068 | 2.81E-155 | Cyto_CD8.T        | Toxoplasmosis                                                 | 0.001814 | BIRC3/IFNGR1/JAK1/NFKB1/NFKBIA/TGFB1/TNF                                                                                                                                                                | 7     |
| RPS12       | 0.419212651 | 4.59E-151 | Cyto_CD8.T        | Viral myocarditis                                             | 0.002384 | CD55/FYN/HLA-B/HLA-E/PRF1                                                                                                                                                                               | 5     |
| CD160       | 0.666744818 | 1.18E-149 | Cyto_CD8.T        | Human T-cell leukemia virus 1 infection                       | 0.00246  | HLA-B/HLA-E/JAK1/NFKB1/NFKBIA/PIK3R1/RELB/TGFB1/TNF/ZFP36                                                                                                                                               | 10    |
| CD48        | 0.580218297 | 1.71E-149 | Cyto_CD8.T        | Sphingolipid signaling pathway                                | 0.002564 | FCER1G/FYN/NFKB1/PIK3R1/PPP2R5C/TNF/S1PR5                                                                                                                                                               | 7     |
| RPS18       | 0.482131132 | 3.55E-146 | Cyto_CD8.T        | Allograft rejection                                           | 0.002801 | HLA-B/HLA-E/PRF1/TNF                                                                                                                                                                                    | 4     |
| ISG20       | 0.638242423 | 1.01E-144 | Cyto_CD8.T        | Cellular senescence                                           | 0.00303  | ZFP36L2/CALM1/HLA-B/HLA-E/GADD45B/NFKB1/PIK3R1/TGFB1                                                                                                                                                    | 8     |
| HLA-B       | 0.333423927 | 8.09E-144 | Cyto_CD8.T        | Chemokine signaling pathway                                   | 0.003096 | NFKB1/NFKBIA/PIK3R1/RAP1B/CCL4/XCL1/XCL2/CXCR4/GNG2                                                                                                                                                     | 9     |
| CALM1       | 0.442197117 | 6.53E-140 | Cyto_CD8.T        | Transcriptional misregulation in cancer                       | 0.003096 | BIRC3/BCL2A1/GADD45B/NFKB1/REL/ZBTB16/NR4A3/KLF3/NFKBIZ                                                                                                                                                 | 9     |
| FGFBP2      | 1.202661057 | 7.89E-138 | Cyto_CD8.T        | FoxO signaling pathway                                        | 0.004379 | CDKN2D/IL7R/GADD45B/PIK3R1/STK4/TGFB1/KLF2                                                                                                                                                              | 7     |
| S1PR5       | 0.506229872 | 2.45E-136 | Cyto_CD8.T        | Type I diabetes mellitus                                      | 0.004409 | HLA-B/HLA-E/PRF1/TNF                                                                                                                                                                                    | 4     |
| HCST        | 0.480357491 | 1.18E-133 | Cyto_CD8.T        | Viral carcinogenesis                                          | 0.00462  | DDX3X/HLA-B/HLA-E/JAK1/NFKB1/NFKBIA/PIK3R1/REL/YWHAZ                                                                                                                                                    | 9     |
| RPL17       | 0.417469294 | 1.43E-130 | Cyto_CD8.T        | Viral protein interaction with cytokine and cytokine receptor | 0.004696 | CCL4/XCL1/XCL2/TNF/CXCR4/TNFSF14                                                                                                                                                                        | 6     |
| GNLY        | 2.612102501 | 8.51E-129 | Cyto_CD8.T        | Toll-like receptor signaling pathway                          | 0.005684 | MAP3K8/NFKB1/NFKBIA/PIK3R1/CCL4/TNF                                                                                                                                                                     | 6     |
| LTB         | 1.217374645 | 8.58E-128 | Cyto_CD8.T        | MAPK signaling pathway                                        | 0.006243 | AREG/MAP3K8/DUSP2/FLNA/GADD45B/NFKB1/RAP1B/RELB/STK4/TGFB1/TNF                                                                                                                                          | 11    |
| NFKBIA      | 0.999811495 | 2.33E-127 | Cyto_CD8.T        | Pancreatic cancer                                             | 0.006613 | JAK1/GADD45B/NFKB1/PIK3R1/TGFB1                                                                                                                                                                         | 5     |
| MYBL1       | 0.491012539 | 5.48E-127 | Cyto_CD8.T        | Chronic myeloid leukemia                                      | 0.006613 | GADD45B/NFKB1/NFKBIA/PIK3R1/TGFB1                                                                                                                                                                       | 5     |
| PIK3R1      | 0.777459097 | 4.46E-126 | Cyto_CD8.T        | Tuberculosis                                                  | 0.007154 | CALM1/FCER1G/FCGR3A/IFNGR1/JAK1/NFKB1/TGFB1/TNF                                                                                                                                                         | 8     |
| CXCR4       | 0.714427731 | 4.91E-123 | Cyto_CD8.T        | RNA degradation                                               | 0.007774 | BTG1/BTG2/PABPC1/DHX36/CNOT6L                                                                                                                                                                           | 5     |
| RPL39       | 0.340859166 | 1.07E-119 | Cyto_CD8.T        | Neurotrophin signaling pathway                                | 0.010761 | CALM1/MATK/NFKB1/NFKBIA/PIK3R1/RAP1B                                                                                                                                                                    | 6     |
| RPL13       | 0.35953876  | 1.91E-118 | Cyto_CD8.T        | Small cell lung cancer                                        | 0.014455 | BIRC3/GADD45B/NFKB1/NFKBIA/PIK3R1                                                                                                                                                                       | 5     |
| FOSL2       | 0.639357106 | 3.44E-118 | Cyto_CD8.T        | Salmonella infection                                          | 0.015991 | BIRC3/FLNA/NFKB1/NFKBIA/PTPRC/RPS3/TNF/RAB9A/MYL12A                                                                                                                                                     | 9     |
| RPS14       | 0.355173654 | 1.00E-117 | Cyto_CD8.T        | Cytokine-cytokine receptor interaction                        | 0.017103 | IFNGR1/IL7R/LTB/CCL4/XCL1/XCL2/TGFB1/TNF/CXCR4/TNFSF14                                                                                                                                                  | 10    |
| SATB1       | 0.507219043 | 2.77E-116 | Cyto_CD8.T        | Lipid and atherosclerosis                                     | 0.01938  | CALM1/ERN1/NFE2L2/NFKB1/NFKBIA/PIK3R1/RAP1B/TNF                                                                                                                                                         | 8     |
| BTG2        | 0.599528667 | 2.31E-115 | Cyto_CD8.T        | Acute myeloid leukemia                                        | 0.020567 | BCL2A1/NFKB1/PIK3R1/ZBTB16                                                                                                                                                                              | 4     |
| TGFB1       | 0.570168922 | 4.02E-114 | Cyto_CD8.T        | Fc epsilon RI signaling pathway                               | 0.021595 | FCER1G/FYN/PIK3R1/TNF                                                                                                                                                                                   | 4     |
| BIN2        | 0.475098918 | 8.30E-114 | Cyto_CD8.T        | Measles                                                       | 0.021671 | JAK1/NFKB1/NFKBIA/PIK3R1/TNFAIP3/RAB9A                                                                                                                                                                  | 6     |
| SPON2       | 0.83944332  | 1.13E-109 | Cyto_CD8.T        | Fluid shear stress and atherosclerosis                        | 0.021671 | CALM1/NFE2L2/NFKB1/PIK3R1/TNF/KLF2                                                                                                                                                                      | 6     |
| IRF1        | 0.616061917 | 2.48E-107 | Cyto_CD8.T        | RIG-I-like receptor signaling pathway                         | 0.023744 | DDX3X/NFKB1/NFKBIA/TNF                                                                                                                                                                                  | 4     |
| MYL12A      | 0.42040918  | 2.96E-106 | Cyto_CD8.T        | Non-small cell lung cancer                                    | 0.026019 | GADD45B/PIK3R1/STK4/EML4                                                                                                                                                                                | 4     |
| CTSW        | 0.564861529 | 3.34E-105 | Cyto_CD8.T        | Pertussis                                                     | 0.03095  | CALM1/IRF1/NFKB1/TNF                                                                                                                                                                                    | 4     |
| RPL41       | 0.279053398 | 2.84E-103 | Cyto_CD8.T        | Hepatitis C                                                   | 0.036415 | JAK1/NFKB1/NFKBIA/PIK3R1/TNF/YWHAZ                                                                                                                                                                      | 6     |
| TPT1        | 0.367156233 | 3.07E-103 | Cyto_CD8.T        | Necroptosis                                                   | 0.038371 | BIRC3/IFNGR1/JAK1/STAT4/TNF/TNFAIP3                                                                                                                                                                     | 6     |
| KLF3        | 0.451410533 | 4.46E-103 | Cyto_CD8.T        | B cell receptor signaling pathway                             | 0.039315 | NFKB1/NFKBIA/PIK3R1/IFITM1                                                                                                                                                                              | 4     |

|           |             |           |            |                            |          |                                 |   |
|-----------|-------------|-----------|------------|----------------------------|----------|---------------------------------|---|
| VPS37B    | 0.556765702 | 2.43E-101 | Cyto_CD8.T | Malaria                    | 0.043093 | KLRB1/TGFB1/TNF                 | 3 |
| KDM6B     | 0.559654401 | 2.74E-101 | Cyto_CD8.T | Platelet activation        | 0.044785 | FCER1G/FYN/PIK3R1/RAP1B/MYL12A  | 5 |
| FKBP11    | 0.422708234 | 2.76E-101 | Cyto_CD8.T | Colorectal cancer          | 0.045542 | AREG/GADD45B/PIK3R1/TGFB1       | 4 |
| RPL27A    | 0.493574788 | 3.03E-101 | Cyto_CD8.T | Cell cycle                 | 0.047415 | CCNH/CDKN2D/GADD45B/TGFB1/YWHAZ | 5 |
| RUNX3     | 0.520172973 | 1.22E-100 | Cyto_CD8.T | Autoimmune thyroid disease | 0.049814 | HLA-B/HLA-E/PRF1                | 3 |
| NFE2L2    | 0.620360075 | 1.93E-100 | Cyto_CD8.T |                            |          |                                 |   |
| CMC1      | 0.702775631 | 9.39E-99  | Cyto_CD8.T |                            |          |                                 |   |
| KLRG1     | 0.516399333 | 3.43E-98  | Cyto_CD8.T |                            |          |                                 |   |
| STAT4     | 0.415862779 | 3.43E-96  | Cyto_CD8.T |                            |          |                                 |   |
| GPR65     | 0.573829083 | 6.93E-96  | Cyto_CD8.T |                            |          |                                 |   |
| ARL4C     | 0.611195128 | 5.78E-95  | Cyto_CD8.T |                            |          |                                 |   |
| HLA-E     | 0.357708941 | 1.64E-94  | Cyto_CD8.T |                            |          |                                 |   |
| CD247     | 0.654808752 | 1.48E-93  | Cyto_CD8.T |                            |          |                                 |   |
| GZMK      | 0.6476144   | 6.29E-92  | Cyto_CD8.T |                            |          |                                 |   |
| RAB8B     | 0.476083262 | 3.88E-91  | Cyto_CD8.T |                            |          |                                 |   |
| SRGN      | 0.426920682 | 1.22E-89  | Cyto_CD8.T |                            |          |                                 |   |
| RPL37A    | 0.378064558 | 2.50E-89  | Cyto_CD8.T |                            |          |                                 |   |
| DDIT4     | 0.537303457 | 5.11E-89  | Cyto_CD8.T |                            |          |                                 |   |
| CCL4      | 0.626957151 | 2.93E-88  | Cyto_CD8.T |                            |          |                                 |   |
| GNG2      | 0.517404346 | 3.32E-88  | Cyto_CD8.T |                            |          |                                 |   |
| RPL5      | 0.31838278  | 3.55E-87  | Cyto_CD8.T |                            |          |                                 |   |
| XCL1      | 1.16908713  | 4.00E-86  | Cyto_CD8.T |                            |          |                                 |   |
| EIF1      | 0.284052117 | 1.93E-85  | Cyto_CD8.T |                            |          |                                 |   |
| ZFP36L2   | 0.525366698 | 1.22E-84  | Cyto_CD8.T |                            |          |                                 |   |
| SYTL3     | 0.478005203 | 2.10E-84  | Cyto_CD8.T |                            |          |                                 |   |
| FAM177A1  | 0.62972454  | 5.91E-84  | Cyto_CD8.T |                            |          |                                 |   |
| MBP       | 0.393025743 | 1.05E-83  | Cyto_CD8.T |                            |          |                                 |   |
| AOAH      | 0.36176879  | 7.02E-83  | Cyto_CD8.T |                            |          |                                 |   |
| NR4A2     | 0.583895837 | 8.70E-83  | Cyto_CD8.T |                            |          |                                 |   |
| RPS3A     | 0.329835167 | 2.10E-82  | Cyto_CD8.T |                            |          |                                 |   |
| PNRC1     | 0.375963147 | 4.82E-82  | Cyto_CD8.T |                            |          |                                 |   |
| TENT5C    | 0.410292373 | 8.41E-82  | Cyto_CD8.T |                            |          |                                 |   |
| LYAR      | 0.428453326 | 1.70E-81  | Cyto_CD8.T |                            |          |                                 |   |
| PLEK      | 0.41895751  | 3.01E-81  | Cyto_CD8.T |                            |          |                                 |   |
| RPS6      | 0.352277437 | 9.53E-81  | Cyto_CD8.T |                            |          |                                 |   |
| KLF2      | 0.621458862 | 7.82E-80  | Cyto_CD8.T |                            |          |                                 |   |
| RPL32     | 0.283106235 | 1.29E-79  | Cyto_CD8.T |                            |          |                                 |   |
| MALAT1    | 0.273307659 | 7.52E-79  | Cyto_CD8.T |                            |          |                                 |   |
| PDCC4     | 0.455730429 | 3.90E-78  | Cyto_CD8.T |                            |          |                                 |   |
| TIPARP    | 0.479364528 | 8.49E-78  | Cyto_CD8.T |                            |          |                                 |   |
| GADD45B   | 0.726622697 | 1.94E-77  | Cyto_CD8.T |                            |          |                                 |   |
| LINC00623 | 0.356129786 | 2.69E-77  | Cyto_CD8.T |                            |          |                                 |   |
| PIP4K2A   | 0.367422946 | 3.60E-77  | Cyto_CD8.T |                            |          |                                 |   |
| RPL21     | 0.328759965 | 1.76E-76  | Cyto_CD8.T |                            |          |                                 |   |
| FYN       | 0.423150696 | 3.25E-76  | Cyto_CD8.T |                            |          |                                 |   |
| RPL11     | 0.26739107  | 7.27E-76  | Cyto_CD8.T |                            |          |                                 |   |
| RPL23A    | 0.313611705 | 9.31E-76  | Cyto_CD8.T |                            |          |                                 |   |
| ZBTB16    | 0.358865705 | 4.50E-75  | Cyto_CD8.T |                            |          |                                 |   |
| PPP2R5C   | 0.433803311 | 1.32E-73  | Cyto_CD8.T |                            |          |                                 |   |
| ABHD17A   | 0.428392184 | 3.98E-73  | Cyto_CD8.T |                            |          |                                 |   |
| TYROBP    | 0.421691549 | 3.99E-73  | Cyto_CD8.T |                            |          |                                 |   |
| ARL5B     | 0.419551678 | 1.17E-72  | Cyto_CD8.T |                            |          |                                 |   |
| FEZ1      | 0.342105363 | 1.83E-70  | Cyto_CD8.T |                            |          |                                 |   |
| KMT2E     | 0.434484357 | 4.93E-70  | Cyto_CD8.T |                            |          |                                 |   |
| FCRL6     | 0.286943412 | 6.92E-70  | Cyto_CD8.T |                            |          |                                 |   |
| RPL14     | 0.274288139 | 7.43E-70  | Cyto_CD8.T |                            |          |                                 |   |
| AREG      | 0.783144567 | 1.07E-68  | Cyto_CD8.T |                            |          |                                 |   |
| RPS21     | 0.263304522 | 2.11E-68  | Cyto_CD8.T |                            |          |                                 |   |
| NFKB1     | 0.543199886 | 4.47E-68  | Cyto_CD8.T |                            |          |                                 |   |
| CD55      | 0.3759      | 1.41E-67  | Cyto_CD8.T |                            |          |                                 |   |
| PDE7A     | 0.387091123 | 8.72E-66  | Cyto_CD8.T |                            |          |                                 |   |
| FCGR3A    | 0.590022994 | 1.16E-65  | Cyto_CD8.T |                            |          |                                 |   |
| CEMIP2    | 0.548904151 | 1.28E-65  | Cyto_CD8.T |                            |          |                                 |   |
| TLE5      | 0.384057369 | 1.32E-64  | Cyto_CD8.T |                            |          |                                 |   |



|            |             |          |            |
|------------|-------------|----------|------------|
| TC2N       | 0.319189576 | 1.90E-64 | Cyto_CD8.T |
| CDKN2D     | 0.344372211 | 1.39E-63 | Cyto_CD8.T |
| RPS10      | 0.294633866 | 1.27E-62 | Cyto_CD8.T |
| IFITM2     | 0.467869893 | 1.34E-61 | Cyto_CD8.T |
| EEF1B2     | 0.307547641 | 1.46E-61 | Cyto_CD8.T |
| GIMAP7     | 0.418707187 | 3.64E-61 | Cyto_CD8.T |
| PITPNC1    | 0.288440813 | 4.80E-61 | Cyto_CD8.T |
| CD300A     | 0.324996012 | 6.26E-61 | Cyto_CD8.T |
| NKG7       | 0.442274804 | 7.37E-61 | Cyto_CD8.T |
| AUTS2      | 0.268580788 | 1.30E-60 | Cyto_CD8.T |
| FLNA       | 0.358620376 | 3.81E-60 | Cyto_CD8.T |
| LINC00861  | 0.267687499 | 5.72E-60 | Cyto_CD8.T |
| SYNGR1     | 0.275806594 | 2.99E-59 | Cyto_CD8.T |
| IL7R       | 0.872969401 | 7.82E-59 | Cyto_CD8.T |
| TRGC1      | 0.354519815 | 1.03E-58 | Cyto_CD8.T |
| JAK1       | 0.3832006   | 1.04E-58 | Cyto_CD8.T |
| AC245297.3 | 0.312627295 | 1.98E-58 | Cyto_CD8.T |
| MAP3K8     | 0.351945558 | 5.94E-58 | Cyto_CD8.T |
| ANXA1      | 0.388510097 | 6.38E-58 | Cyto_CD8.T |
| PRR7       | 0.308798584 | 8.98E-57 | Cyto_CD8.T |
| NR4A3      | 0.364827328 | 6.74E-56 | Cyto_CD8.T |
| RBM39      | 0.338552624 | 1.81E-55 | Cyto_CD8.T |
| GPR35      | 0.279213093 | 1.84E-55 | Cyto_CD8.T |
| SAMD3      | 0.293403262 | 2.17E-55 | Cyto_CD8.T |
| SELENOK    | 0.394302837 | 4.00E-55 | Cyto_CD8.T |
| IFNGR1     | 0.346827945 | 8.17E-55 | Cyto_CD8.T |
| LITAF      | 0.418408784 | 2.90E-54 | Cyto_CD8.T |
| C1orf21    | 0.259086724 | 1.14E-53 | Cyto_CD8.T |
| SLC38A1    | 0.329848705 | 2.20E-53 | Cyto_CD8.T |
| KLRD1      | 0.413413943 | 5.00E-53 | Cyto_CD8.T |
| IFITM1     | 0.377632533 | 1.12E-52 | Cyto_CD8.T |
| PTPRC      | 0.290459319 | 2.13E-51 | Cyto_CD8.T |
| PARP8      | 0.266706575 | 7.06E-51 | Cyto_CD8.T |
| GIMAP1     | 0.272266623 | 9.90E-50 | Cyto_CD8.T |
| LCP1       | 0.339503533 | 1.33E-49 | Cyto_CD8.T |
| EMP3       | 0.38836019  | 3.88E-49 | Cyto_CD8.T |
| PABPC1     | 0.362061091 | 1.19E-48 | Cyto_CD8.T |
| CDC42SE2   | 0.327797572 | 1.82E-48 | Cyto_CD8.T |
| CLIC3      | 0.489922668 | 3.37E-48 | Cyto_CD8.T |
| STK17A     | 0.339210625 | 1.07E-47 | Cyto_CD8.T |
| PTGER4     | 0.313244514 | 1.48E-46 | Cyto_CD8.T |
| ADGRE5     | 0.35998721  | 2.78E-46 | Cyto_CD8.T |
| UTRN       | 0.292197586 | 7.61E-46 | Cyto_CD8.T |
| ERN1       | 0.260212696 | 1.43E-44 | Cyto_CD8.T |
| EML4       | 0.31969378  | 1.45E-44 | Cyto_CD8.T |
| TNFAIP3    | 0.482022949 | 3.00E-44 | Cyto_CD8.T |
| RPL13A     | 0.262283608 | 3.18E-44 | Cyto_CD8.T |
| BCL2A1     | 0.496784545 | 4.14E-44 | Cyto_CD8.T |
| IQGAP2     | 0.27119841  | 6.43E-44 | Cyto_CD8.T |
| KLRC3      | 0.304163098 | 2.84E-43 | Cyto_CD8.T |
| APMAP      | 0.314057503 | 4.29E-43 | Cyto_CD8.T |
| SMAD7      | 0.287090194 | 1.59E-42 | Cyto_CD8.T |
| SLC2A3     | 0.318630118 | 2.82E-42 | Cyto_CD8.T |
| RELB       | 0.295734886 | 7.58E-42 | Cyto_CD8.T |
| STOM       | 0.265470866 | 2.67E-41 | Cyto_CD8.T |
| RALGAPA1   | 0.257981458 | 5.75E-41 | Cyto_CD8.T |
| RAB29      | 0.265097688 | 1.82E-40 | Cyto_CD8.T |
| NFKBID     | 0.339454334 | 3.70E-40 | Cyto_CD8.T |
| EFHD2      | 0.433223329 | 3.89E-40 | Cyto_CD8.T |
| RAP1B      | 0.315434581 | 6.48E-40 | Cyto_CD8.T |
| RBM38      | 0.264515294 | 4.73E-38 | Cyto_CD8.T |
| S100A4     | 0.341815638 | 6.47E-38 | Cyto_CD8.T |
| PYHIN1     | 0.290820308 | 1.40E-37 | Cyto_CD8.T |
| CCNH       | 0.297354153 | 2.06E-37 | Cyto_CD8.T |

|          |             |            |            |
|----------|-------------|------------|------------|
| BZW1     | 0.28416045  | 2.25E-37   | Cyto_CD8.T |
| SNHG16   | 0.317125188 | 5.56E-37   | Cyto_CD8.T |
| CCDC107  | 0.32161204  | 5.52E-36   | Cyto_CD8.T |
| YWHAZ    | 0.278924962 | 1.11E-35   | Cyto_CD8.T |
| STK4     | 0.270765401 | 1.24E-35   | Cyto_CD8.T |
| MT-ND3   | 0.276997819 | 1.68E-35   | Cyto_CD8.T |
| SKIL     | 0.252081246 | 3.62E-35   | Cyto_CD8.T |
| TAGAP    | 0.293392837 | 3.64E-35   | Cyto_CD8.T |
| SMAP2    | 0.285467035 | 2.86E-34   | Cyto_CD8.T |
| PRF1     | 0.410441245 | 2.00E-33   | Cyto_CD8.T |
| TNFSF14  | 0.291825419 | 6.99E-33   | Cyto_CD8.T |
| SLC38A2  | 0.264449714 | 8.42E-33   | Cyto_CD8.T |
| TNF      | 0.326773414 | 2.56E-32   | Cyto_CD8.T |
| RAB9A    | 0.25138034  | 3.21E-32   | Cyto_CD8.T |
| CREM     | 0.339284205 | 3.60E-31   | Cyto_CD8.T |
| FCER1G   | 0.436447939 | 4.64E-31   | Cyto_CD8.T |
| CDC42SE1 | 0.290497261 | 8.08E-31   | Cyto_CD8.T |
| NOP53    | 0.256040134 | 9.29E-31   | Cyto_CD8.T |
| GZMH     | 0.437140141 | 2.08E-30   | Cyto_CD8.T |
| KLRC1    | 0.327459068 | 8.41E-30   | Cyto_CD8.T |
| ZFAS1    | 0.282038476 | 9.82E-30   | Cyto_CD8.T |
| NFKBIZ   | 0.3037041   | 1.27E-27   | Cyto_CD8.T |
| BAZ1A    | 0.312278772 | 2.43E-27   | Cyto_CD8.T |
| SRSF2    | 0.284330094 | 6.09E-27   | Cyto_CD8.T |
| CNOT6L   | 0.251090256 | 1.05E-26   | Cyto_CD8.T |
| CAST     | 0.257127376 | 1.32E-25   | Cyto_CD8.T |
| DHX36    | 0.2510258   | 1.57E-25   | Cyto_CD8.T |
| BIRC3    | 0.340332094 | 1.52E-24   | Cyto_CD8.T |
| JUNB     | 0.283815124 | 7.55E-24   | Cyto_CD8.T |
| OTULIN   | 0.277329342 | 8.02E-23   | Cyto_CD8.T |
| METRNL   | 0.420465604 | 8.78E-22   | Cyto_CD8.T |
| DDX3X    | 0.261968439 | 2.28E-20   | Cyto_CD8.T |
| RPS26    | 0.399531935 | 1.79E-19   | Cyto_CD8.T |
| ZFP36    | 0.256543412 | 9.61E-14   | Cyto_CD8.T |
| ATP1B3   | 0.254724753 | 0.00184625 | Cyto_CD8.T |

c. Exhaustion CD8.T

| Gene symbol | avg_log2FC  | p_val_adj | Upregulated group | Description                                       | pvalue   | geneID                                                                                                                                   | Count |
|-------------|-------------|-----------|-------------------|---------------------------------------------------|----------|------------------------------------------------------------------------------------------------------------------------------------------|-------|
| CXCL13      | 3.163700817 | 0         | Exhaustion_CD8.T  | Antigen processing and presentation               | 5.87E-14 | CD8A/CD8B/CD74/HLA-DMA/HLA-DPA1/HLA-DPB1/HLA-DQA1/HLA-DQA2/HLA-DQB1/HLA-DRA/HLA-DRB1/HSPA1A/HSPA1B/HSPA6/HSPA8/HSP90AA1/HSP90AB1/KIR2DL4 | 13    |
| DUSP4       | 1.636977612 | 0         | Exhaustion_CD8.T  | Hematopoietic cell lineage                        | 4.74E-10 | CD2/CD3D/CD3E/CD3G/CD7/CD8A/CD8B/CSF1/HLA-DMA/HLA-DPA1/HLA-DPB1/HLA-DQA1/HLA-DQA2/HLA-DQB1/HLA-DRA/HLA-DRB1                              | 15    |
| SERPINA1    | 1.566077695 | 0         | Exhaustion_CD8.T  | Th17 cell differentiation                         | 1.79E-09 | CD3D/CD3E/CD3G/HLA-DMA/HLA-DPA1/HLA-DPB1/HLA-DQA1/HLA-DQA2/HLA-DQB1/HLA-DRA/HLA-DRB1/HSP90AA1/HSP90AB1/JUN/LCK/STAT3                     | 12    |
| REG1A       | 1.551540143 | 0         | Exhaustion_CD8.T  | Th1 and Th2 cell differentiation                  | 1.36E-08 | CD3D/CD3E/CD3G/HLA-DMA/HLA-DPA1/HLA-DPB1/HLA-DQA1/HLA-DQA2/HLA-DQB1/HLA-DRA/HLA-DRB1/RBPJ/JUN/LCK                                        | 11    |
| GAPDH       | 1.380910014 | 0         | Exhaustion_CD8.T  | Human T-cell leukemia virus 1 infection           | 1.04E-07 | TSPO/CD3D/CD3E/CD3G/CDKN2A/CDKN2C/HLA-DMA/HLA-DPA1/HLA-DPB1/HLA-DQA1/HLA-DQA2/HLA-DQB1/HLA-DRA/HLA-DRB1/JUN/LCK/RAN/RANBP1/PTTG1/ANAPC11 | 13    |
| LAG3        | 1.33357325  | 0         | Exhaustion_CD8.T  | Rheumatoid arthritis                              | 1.29E-07 | ACP5/CSF1/CTLA4/HLA-DMA/HLA-DPA1/HLA-DPB1/HLA-DQA1/HLA-DQA2/HLA-DQB1/HLA-DRA/HLA-DRB1/JUN/CCL5                                           | 11    |
| CD27        | 1.12119676  | 0         | Exhaustion_CD8.T  | Asthma                                            | 2.79E-07 | HLA-DMA/HLA-DPA1/HLA-DPB1/HLA-DQA1/HLA-DQA2/HLA-DQB1/HLA-DRA/HLA-DRB1                                                                    | 14    |
| CTLA4       | 1.070303101 | 0         | Exhaustion_CD8.T  | Type I diabetes mellitus                          | 3.45E-07 | HLA-DMA/HLA-DPA1/HLA-DPB1/HLA-DQA1/HLA-DQA2/HLA-DQB1/HLA-DRA/HLA-DRB1/HSPD1                                                              | 9     |
| PDCD1       | 0.80582057  | 0         | Exhaustion_CD8.T  | Chemical carcinogenesis - reactive oxygen species | 5.26E-07 | ATP5F1C/ATP5MC1/ATP5MC2/ATP5MC3/COX8A/AKR1C1/AKR1C2/HMOX1/JUN/MGST1/MGST3/NDUFC2/NDUFV2/SOD1/AKR1C3/COX5A/GSTO1/UQCR10/NDUFA13           | 15    |
| GEM         | 0.752919455 | 0         | Exhaustion_CD8.T  | Cell adhesion molecules                           | 1.09E-06 | CD2/CD8A/CD8B/CTLA4/HLA-DMA/HLA-DPA1/HLA-DPB1/HLA-DQA1/HLA-DQA2/HLA-DQB1/HLA-DRA/HLA-DRB1/PDCD1/ICOS/TIGIT                               | 13    |
| REG3A       | 0.747643464 | 0         | Exhaustion_CD8.T  | Intestinal immune network for IgA production      | 1.12E-06 | HLA-DMA/HLA-DPA1/HLA-DPB1/HLA-DQA1/HLA-DQA2/HLA-DQB1/HLA-DRA/HLA-DRB1/ICOS                                                               | 9     |
| LINC01480   | 0.745198744 | 0         | Exhaustion_CD8.T  | Toxoplasmosis                                     | 1.16E-06 | HLA-DMA/HLA-DPA1/HLA-DPB1/HLA-DQA1/HLA-DQA2/HLA-DQB1/HLA-DRA/HLA-DRB1/HSPA1A/HSPA1B/HSPA6/HSPA8/STAT3                                    | 11    |
| SIRPG       | 0.680164113 | 0         | Exhaustion_CD8.T  | Staphylococcus aureus infection                   | 1.37E-06 | C3/FGG/CFH/HLA-DMA/HLA-DPA1/HLA-DPB1/HLA-DQA1/HLA-DQA2/HLA-DQB1/HLA-DRA/HLA-DRB1/KRT18                                                   | 8     |
| AGT         | 0.677439718 | 0         | Exhaustion_CD8.T  | Allograft rejection                               | 1.51E-06 | HLA-DMA/HLA-DPA1/HLA-DPB1/HLA-DQA1/HLA-DQA2/HLA-DQB1/HLA-DRA/HLA-DRB1                                                                    | 7     |
| NBL1        | 0.635583916 | 0         | Exhaustion_CD8.T  | Inflammatory bowel disease                        | 1.55E-06 | HLA-DMA/HLA-DPA1/HLA-DPB1/HLA-DQA1/HLA-DQA2/HLA-DQB1/HLA-DRA/HLA-DRB1/JUN/STAT3                                                          | 9     |
| LINC01943   | 0.627682214 | 0         | Exhaustion_CD8.T  | Autoimmune thyroid disease                        | 2.24E-06 | CTLA4/HLA-DMA/HLA-DPA1/HLA-DPB1/HLA-DQA1/HLA-DQA2/HLA-DQB1/HLA-DRA/HLA-DRB1                                                              | 8     |

|          |             |           |                  |                                                        |          |                                                                                                                                 |    |
|----------|-------------|-----------|------------------|--------------------------------------------------------|----------|---------------------------------------------------------------------------------------------------------------------------------|----|
| CD82     | 0.610494397 | 0         | Exhaustion_CD8.T | Epstein-Barr virus infection                           | 2.56E-06 | CD3D/CD3E/CD3G/ENTPD1/HLA-DMA/HLA-DPA1/HLA-DPB1/HLA-DQA1/HLA-DQA2/HLA-DQB1/HLA-DRA/HLA-DRB1/RBPJ/JUN/STAT3/TRAF5/SEM1           | 11 |
| TSHZ2    | 0.584107196 | 0         | Exhaustion_CD8.T | Graft-versus-host disease                              | 3.38E-06 | HLA-DMA/HLA-DPA1/HLA-DPB1/HLA-DQA1/HLA-DQA2/HLA-DQB1/HLA-DRA/HLA-DRB1                                                           | 10 |
| NTS      | 0.583902443 | 0         | Exhaustion_CD8.T | Leishmaniasis                                          | 7.52E-06 | C3/HLA-DMA/HLA-DPA1/HLA-DPB1/HLA-DQA1/HLA-DQA2/HLA-DQB1/HLA-DRA/HLA-DRB1/JUN                                                    | 12 |
| KRT18    | 0.576147846 | 0         | Exhaustion_CD8.T | Diabetic cardiomyopathy                                | 1.19E-05 | AGT/ATP5F1C/ATP5MC1/ATP5MC2/ATP5MC3/COX8A/CTS/D/GAPDH/NDUFC2/NDUFV2/PRKCA/COX5A/TBC1D4/MPC2/UQCR10/NDUFA13                      | 15 |
| AHSG     | 0.570473942 | 0         | Exhaustion_CD8.T | Glycolysis / Gluconeogenesis                           | 1.65E-05 | ENO1/GAPDH/LDHA/LDHB/PGAM1/PGK1/PKM/TP11/GALM                                                                                   | 8  |
| PTGR1    | 0.512510522 | 0         | Exhaustion_CD8.T | Complement and coagulation cascades                    | 1.84E-05 | A2M/C3/CLU/FGA/FGB/FGG/CFH/CFHR1/SERPINA1/VTN                                                                                   | 10 |
| APOM     | 0.497764557 | 0         | Exhaustion_CD8.T | Parkinson disease                                      | 2.70E-05 | ATP5F1C/ATP5MC1/ATP5MC2/ATP5MC3/CALM3/COX8A/NDUFC2/NDUFV2/SOD1/TXN/UBB/UBC/SEM1/UBE2L6/COX5A/PARK7/UQCR10/NDUFA13               | 14 |
| NPW      | 0.472442164 | 0         | Exhaustion_CD8.T | Prion disease                                          | 3.82E-05 | ATP5F1C/ATP5MC1/ATP5MC2/ATP5MC3/COX8A/CSNK2B/HSPA1A/HSPA1B/HSPA6/HSPA8/NDUFC2/NDUFV2/CCL5/SOD1/SEM1/COX5A/UQCR10/NDUFA13        | 16 |
| KIR2DL4  | 0.449403179 | 0         | Exhaustion_CD8.T | Tuberculosis                                           | 4.92E-05 | C3/CALM3/CD74/CTS/D/HLA-DMA/HLA-DPA1/HLA-DPB1/HLA-DQA1/HLA-DQA2/HLA-DQB1/HLA-DRA/HLA-DRB1/HSPD1/LSP1                            | 13 |
| AKR1B10  | 0.446403755 | 0         | Exhaustion_CD8.T | Viral myocarditis                                      | 5.19E-05 | HLA-DMA/HLA-DPA1/HLA-DPB1/HLA-DQA1/HLA-DQA2/HLA-DQB1/HLA-DRA/HLA-DRB1                                                           | 8  |
| SRGAP3   | 0.438321983 | 0         | Exhaustion_CD8.T | Estrogen signaling pathway                             | 5.87E-05 | CALM3/CTS/D/FKBP4/FKBP5/HSPA1A/HSPA1B/HSPA6/HSPA8/HSP90AA1/HSP90AB1/JUN/KRT18                                                   | 10 |
| KRT8     | 0.436278719 | 0         | Exhaustion_CD8.T | Lipid and atherosclerosis                              | 9.22E-05 | APOA1/APOA4/CALM3/HSPA1A/HSPA1B/HSPA6/HSPA8/HSP90AA1/HSP90AB1/HSPD1/JUN/PRKCA/CCL5/STAT3/PYCARD                                 | 13 |
| ZBED2    | 0.430102466 | 0         | Exhaustion_CD8.T | T cell receptor signaling pathway                      | 0.000106 | CD3D/CD3E/CD3G/CD8A/CD8B/CTLA4/JUN/LCK/PDCD1/ICOS                                                                               | 10 |
| HLA-DQA2 | 0.312561696 | 0         | Exhaustion_CD8.T | PD-L1 expression and PD-1 checkpoint pathway in cancer | 0.00016  | CD3D/CD3E/CD3G/CSNK2B/JUN/LCK/PDCD1/STAT3/BATF                                                                                  | 9  |
| AFAP1L2  | 0.302069882 | 0         | Exhaustion_CD8.T | Primary immunodeficiency                               | 0.000178 | CD3D/CD3E/CD8A/CD8B/LCK/ICOS                                                                                                    | 6  |
| LAYN     | 0.300214908 | 0         | Exhaustion_CD8.T | Legionellosis                                          | 0.000261 | C3/HSPA1A/HSPA1B/HSPA6/HSPA8/HSPD1/PYCARD                                                                                       | 7  |
| TBC1D4   | 0.501083947 | 4.82E-298 | Exhaustion_CD8.T | Influenza A                                            | 0.000446 | HLA-DMA/HLA-DPA1/HLA-DPB1/HLA-DQA1/HLA-DQA2/HLA-DQB1/HLA-DRA/HLA-DRB1/DNAJB1/PRKCA/CCL5/PYCARD                                  | 9  |
| RBPJ     | 0.991488995 | 3.85E-288 | Exhaustion_CD8.T | HIF-1 signaling pathway                                | 0.000732 | ENO1/GAPDH/HMOX1/LDHA/LDHB/PGK1/PRKCA/STAT3/TF                                                                                  | 8  |
| CD200    | 0.274241536 | 1.59E-281 | Exhaustion_CD8.T | Cholesterol metabolism                                 | 0.000822 | APOA1/APOA2/APOA4/APOC2/APOE/TSPO                                                                                               | 6  |
| AKR1C1   | 0.377745291 | 8.29E-277 | Exhaustion_CD8.T | Oxidative phosphorylation                              | 0.000831 | ATP5F1C/ATP5MC1/ATP5MC2/ATP5MC3/COX8A/NDUFC2/NDUFV2/COX5A/UQCR10/NDUFA13                                                        | 11 |
| FGL1     | 0.540211708 | 1.77E-275 | Exhaustion_CD8.T | Measles                                                | 0.001102 | CD3D/CD3E/CD3G/CSNK2B/HSPA1A/HSPA1B/HSPA6/HSPA8/JUN/STAT3                                                                       | 12 |
| FABP1    | 0.713265305 | 2.84E-272 | Exhaustion_CD8.T | Protein export                                         | 0.001554 | SRP14/SPCS2/SEC11A/SPCS1                                                                                                        | 4  |
| CD8B     | 0.995537284 | 1.56E-268 | Exhaustion_CD8.T | Protein processing in endoplasmic reticulum            | 0.00157  | DNAJA1/HSPA1A/HSPA1B/HSPA6/HSPA8/HSP90AA1/HSP90AB1/DNAJB1/HERPUD1/PDIA6/HSPH1                                                   | 10 |
| PLA2G2A  | 0.92563952  | 4.08E-267 | Exhaustion_CD8.T | Fat digestion and absorption                           | 0.002594 | APOA1/APOA4/FABP1/PLA2G2A/PLPP1                                                                                                 | 5  |
| SPINK1   | 0.560788528 | 1.35E-262 | Exhaustion_CD8.T | Systemic lupus erythematosus                           | 0.00343  | C3/HLA-DMA/HLA-DPA1/HLA-DPB1/HLA-DQA1/HLA-DQA2/HLA-DQB1/HLA-DRA/HLA-DRB1                                                        | 9  |
| APOA4    | 0.538480621 | 6.94E-259 | Exhaustion_CD8.T | Fluid shear stress and atherosclerosis                 | 0.003966 | CALM3/HMOX1/HSP90AA1/HSP90AB1/JUN/MGST1/MGST3/TXN/GSTO1                                                                         | 10 |
| IGKC     | 0.834864073 | 6.59E-256 | Exhaustion_CD8.T | Pathways of neurodegeneration - multiple diseases      | 0.004857 | ATP5F1C/ATP5MC1/ATP5MC2/ATP5MC3/CALM3/COX8A/CSF1/CSNK2B/NDUFC2/NDUFV2/PRKCA/SOD1/UBB/UBC/SEM1/UBE2L6/COX5A/PARK7/UQCR10/NDUFA13 | 12 |
| FKBP1A   | 0.860231406 | 1.84E-247 | Exhaustion_CD8.T | Biosynthesis of amino acids                            | 0.006567 | ENO1/GAPDH/PGAM1/PGK1/PKM/TP11                                                                                                  | 6  |
| ENTPD1   | 0.344405313 | 7.70E-247 | Exhaustion_CD8.T | Phagosome                                              | 0.007086 | C3/HLA-DMA/HLA-DPA1/HLA-DPB1/HLA-DQA1/HLA-DQA2/HLA-DQB1/HLA-DRA/HLA-DRB1                                                        | 9  |
| FABP5    | 1.076830029 | 6.51E-244 | Exhaustion_CD8.T | Human immunodeficiency virus 1 infection               | 0.00808  | BST2/CALM3/CD3D/CD3E/CD3G/GNG5/JUN/PRKCA/TRAF5/APOBEC3C/APOBEC3G                                                                | 10 |
| TNFSF4   | 0.277558975 | 1.05E-243 | Exhaustion_CD8.T | Alzheimer disease                                      | 0.012311 | APOE/ATP5F1C/ATP5MC1/ATP5MC2/ATP5MC3/CALM3/COX8A/CSF1/CSNK2B/GAPDH/NDUFC2/NDUFV2/SEM1/COX5A/UQCR10/NDUFA13                      | 14 |
| AKR1C2   | 0.273921062 | 3.34E-242 | Exhaustion_CD8.T | Longevity regulating pathway - multiple species        | 0.0124   | HSPA1A/HSPA1B/HSPA6/HSPA8/SOD1                                                                                                  | 5  |
| TRAC     | 0.985815748 | 5.36E-241 | Exhaustion_CD8.T | Huntington disease                                     | 0.020014 | ATP5F1C/ATP5MC1/ATP5MC2/ATP5MC3/CLTA/COX8A/NDUFC2/NDUFV2/SOD1/SEM1/COX5A/UQCR10/NDUFA13                                         | 13 |
| DNPH1    | 0.622359488 | 1.05E-234 | Exhaustion_CD8.T | NOD-like receptor signaling pathway                    | 0.022524 | GBP2/HSP90AA1/HSP90AB1/JUN/CCL5/TRAF5/TXN/PYCARD/CARD16                                                                         | 9  |
| HAVCR2   | 0.665923894 | 1.30E-231 | Exhaustion_CD8.T | Salmonella infection                                   | 0.024273 | RHOB/GAPDH/HSP90AA1/HSP90AB1/JUN/RALA/TXN/DYNLL1/PYCARD/SNX9/DYNLRB1                                                            | 10 |
| SNAP47   | 0.42736222  | 9.03E-227 | Exhaustion_CD8.T | PPAR signaling pathway                                 | 0.026248 | APOA1/APOA2/FABP1/FABP5/UBC                                                                                                     | 5  |
| CD3D     | 0.871163799 | 1.68E-224 | Exhaustion_CD8.T | Chagas disease                                         | 0.026848 | C3/CD3D/CD3E/CD3G/JUN/CCL5                                                                                                      | 6  |
| MGST1    | 0.463777607 | 4.65E-223 | Exhaustion_CD8.T | Drug metabolism - other enzymes                        | 0.033466 | TYMP/MGST1/MGST3/NME1/GSTO1                                                                                                     | 5  |
| TIGIT    | 0.905399361 | 3.57E-222 | Exhaustion_CD8.T | Yersinia infection                                     | 0.034245 | CD8A/CD8B/FN1/FYB1/JUN/LCK/PYCARD                                                                                               | 7  |
| CDKN2C   | 0.632378236 | 1.16E-221 | Exhaustion_CD8.T | Thermogenesis                                          | 0.035793 | ATP5F1C/ATP5MC1/ATP5MC2/ATP5MC3/COX8A/NDUFC2/NDUFV2/COX5A/UQCR10/NDUFA13                                                        | 10 |
| IGHG4    | 0.429964118 | 3.02E-213 | Exhaustion_CD8.T | Glutathione metabolism                                 | 0.040681 | MGST1/MGST3/GSTO1/PRDX6                                                                                                         | 4  |
| COTL1    | 0.863029423 | 3.77E-208 | Exhaustion_CD8.T | Carbon metabolism                                      | 0.044366 | ENO1/GAPDH/PGAM1/PGK1/PKM/TP11                                                                                                  | 7  |
| PON2     | 0.311824935 | 3.71E-206 | Exhaustion_CD8.T |                                                        |          |                                                                                                                                 |    |
| PRRG4    | 0.30681407  | 7.43E-203 | Exhaustion_CD8.T |                                                        |          |                                                                                                                                 |    |
| SOD1     | 0.930883646 | 8.53E-202 | Exhaustion_CD8.T |                                                        |          |                                                                                                                                 |    |
| HMOX1    | 0.366543242 | 2.82E-200 | Exhaustion_CD8.T |                                                        |          |                                                                                                                                 |    |
| SERPINH1 | 0.681991247 | 3.40E-193 | Exhaustion_CD8.T |                                                        |          |                                                                                                                                 |    |
| INPP5F   | 0.261930407 | 6.19E-190 | Exhaustion_CD8.T |                                                        |          |                                                                                                                                 |    |
| ACP5     | 0.442278671 | 6.63E-188 | Exhaustion_CD8.T |                                                        |          |                                                                                                                                 |    |
| DGKH     | 0.399650547 | 1.88E-187 | Exhaustion_CD8.T |                                                        |          |                                                                                                                                 |    |
| PTMS     | 0.808216112 | 1.91E-185 | Exhaustion_CD8.T |                                                        |          |                                                                                                                                 |    |
| ALB      | 0.961020828 | 2.81E-180 | Exhaustion_CD8.T |                                                        |          |                                                                                                                                 |    |

|          |             |           |                  |
|----------|-------------|-----------|------------------|
| CD2      | 0.747389641 | 6.00E-179 | Exhaustion_CD8.T |
| HSPA1A   | 1.170007595 | 2.14E-175 | Exhaustion_CD8.T |
| NDFIP2   | 0.330981577 | 2.15E-175 | Exhaustion_CD8.T |
| HSPA1B   | 1.09548967  | 2.34E-175 | Exhaustion_CD8.T |
| AMBP     | 0.539796758 | 2.23E-174 | Exhaustion_CD8.T |
| BAG3     | 0.64038212  | 2.50E-171 | Exhaustion_CD8.T |
| PHLDA1   | 0.72716126  | 3.27E-168 | Exhaustion_CD8.T |
| SIT1     | 0.578682355 | 8.42E-167 | Exhaustion_CD8.T |
| CLU      | 0.411199789 | 4.55E-166 | Exhaustion_CD8.T |
| MIR155HG | 0.567841525 | 3.94E-164 | Exhaustion_CD8.T |
| FAM3C    | 0.766345125 | 1.06E-159 | Exhaustion_CD8.T |
| PLPP1    | 0.266287498 | 3.16E-155 | Exhaustion_CD8.T |
| FTL      | 0.968477127 | 7.83E-155 | Exhaustion_CD8.T |
| HSPB1    | 0.851125894 | 4.54E-149 | Exhaustion_CD8.T |
| FN1      | 0.313816162 | 2.66E-148 | Exhaustion_CD8.T |
| CD8A     | 0.728923145 | 6.93E-146 | Exhaustion_CD8.T |
| STAT3    | 0.855346349 | 7.13E-145 | Exhaustion_CD8.T |
| GALNT2   | 0.308499295 | 3.38E-143 | Exhaustion_CD8.T |
| ARL3     | 0.366209244 | 1.99E-138 | Exhaustion_CD8.T |
| IGLC1    | 0.29353079  | 8.12E-138 | Exhaustion_CD8.T |
| RGS1     | 0.808699721 | 2.19E-137 | Exhaustion_CD8.T |
| APOA2    | 1.164479791 | 1.55E-136 | Exhaustion_CD8.T |
| MS4A6A   | 0.318354109 | 1.04E-132 | Exhaustion_CD8.T |
| IGHA1    | 0.439930735 | 1.10E-129 | Exhaustion_CD8.T |
| TPI1     | 0.691630306 | 8.60E-125 | Exhaustion_CD8.T |
| A2M      | 0.452870819 | 1.47E-124 | Exhaustion_CD8.T |
| CXCR3    | 0.38349699  | 2.27E-121 | Exhaustion_CD8.T |
| CTSD     | 0.58679904  | 6.69E-121 | Exhaustion_CD8.T |
| TRBC2    | 0.799500938 | 2.98E-120 | Exhaustion_CD8.T |
| ITM2A    | 0.718872306 | 1.15E-118 | Exhaustion_CD8.T |
| HLA-DRA  | 0.696012609 | 5.95E-118 | Exhaustion_CD8.T |
| TRAF5    | 0.448019333 | 6.32E-118 | Exhaustion_CD8.T |
| PRDX1    | 0.642626091 | 1.06E-117 | Exhaustion_CD8.T |
| PKM      | 0.702768141 | 1.28E-116 | Exhaustion_CD8.T |
| BATF     | 0.612700304 | 7.11E-116 | Exhaustion_CD8.T |
| TF       | 0.361053843 | 1.31E-114 | Exhaustion_CD8.T |
| HLA-DPA1 | 0.549196741 | 8.68E-114 | Exhaustion_CD8.T |
| APOA1    | 0.635947517 | 6.98E-112 | Exhaustion_CD8.T |
| SLF1     | 0.359172455 | 2.30E-109 | Exhaustion_CD8.T |
| APOE     | 0.465575002 | 4.21E-109 | Exhaustion_CD8.T |
| TNFRSF9  | 0.642756021 | 1.53E-108 | Exhaustion_CD8.T |
| RHOB     | 0.411427943 | 5.58E-108 | Exhaustion_CD8.T |
| ID3      | 0.630283114 | 4.28E-107 | Exhaustion_CD8.T |
| PCED1B   | 0.348695957 | 2.39E-106 | Exhaustion_CD8.T |
| SNX9     | 0.323252756 | 1.12E-105 | Exhaustion_CD8.T |
| TYMP     | 0.518768045 | 2.39E-105 | Exhaustion_CD8.T |
| CD3E     | 0.521708033 | 8.61E-97  | Exhaustion_CD8.T |
| OASL     | 0.439344415 | 1.51E-96  | Exhaustion_CD8.T |
| FGG      | 0.4092412   | 2.85E-96  | Exhaustion_CD8.T |
| HLA-DMA  | 0.448109825 | 2.78E-95  | Exhaustion_CD8.T |
| MIF      | 0.546427512 | 2.88E-95  | Exhaustion_CD8.T |
| TOX      | 0.418107014 | 1.29E-94  | Exhaustion_CD8.T |
| PARK7    | 0.609652695 | 3.05E-94  | Exhaustion_CD8.T |
| CACYBP   | 0.899511477 | 4.42E-94  | Exhaustion_CD8.T |
| VTN      | 0.396528764 | 2.36E-93  | Exhaustion_CD8.T |
| H1FX     | 0.603833122 | 1.17E-91  | Exhaustion_CD8.T |
| AKR1C3   | 0.305404027 | 1.70E-91  | Exhaustion_CD8.T |
| DYNLL1   | 0.604426393 | 2.95E-91  | Exhaustion_CD8.T |
| IGFLR1   | 0.559148566 | 2.01E-90  | Exhaustion_CD8.T |
| CFH      | 0.35768552  | 2.07E-90  | Exhaustion_CD8.T |
| RGS2     | 0.781591168 | 7.86E-90  | Exhaustion_CD8.T |
| SH3BGRL3 | 0.528397248 | 9.71E-88  | Exhaustion_CD8.T |
| AKAP5    | 0.253359569 | 6.59E-86  | Exhaustion_CD8.T |
| BST2     | 0.532675953 | 6.62E-86  | Exhaustion_CD8.T |

|          |             |          |                  |
|----------|-------------|----------|------------------|
| PTTG1    | 0.496740638 | 1.26E-85 | Exhaustion_CD8.T |
| RHBDD2   | 0.290521962 | 1.88E-85 | Exhaustion_CD8.T |
| BICDL1   | 0.346409267 | 2.19E-85 | Exhaustion_CD8.T |
| CD74     | 0.439909503 | 2.50E-85 | Exhaustion_CD8.T |
| FKBP4    | 0.552989364 | 5.34E-84 | Exhaustion_CD8.T |
| HMGB2    | 0.695345634 | 4.17E-83 | Exhaustion_CD8.T |
| PGAM1    | 0.513379527 | 1.48E-81 | Exhaustion_CD8.T |
| CFHR1    | 0.310967054 | 1.74E-80 | Exhaustion_CD8.T |
| CD3G     | 0.465591437 | 2.20E-80 | Exhaustion_CD8.T |
| HSPE1    | 0.625028779 | 3.16E-79 | Exhaustion_CD8.T |
| AHI1     | 0.445066932 | 3.33E-79 | Exhaustion_CD8.T |
| HLA-DRB1 | 0.704768709 | 4.22E-79 | Exhaustion_CD8.T |
| UBE2F    | 0.464749568 | 6.62E-79 | Exhaustion_CD8.T |
| FAM118A  | 0.522695216 | 1.81E-78 | Exhaustion_CD8.T |
| HSP90AA1 | 0.760219344 | 2.45E-78 | Exhaustion_CD8.T |
| CYTOR    | 0.469524533 | 3.09E-78 | Exhaustion_CD8.T |
| CORO1B   | 0.446463866 | 1.97E-77 | Exhaustion_CD8.T |
| IGLC2    | 0.381314039 | 3.31E-77 | Exhaustion_CD8.T |
| RGS10    | 0.42735566  | 3.32E-77 | Exhaustion_CD8.T |
| C3       | 0.448350038 | 5.44E-77 | Exhaustion_CD8.T |
| CD7      | 0.506930398 | 9.11E-75 | Exhaustion_CD8.T |
| TOX2     | 0.268788446 | 1.40E-74 | Exhaustion_CD8.T |
| CD70     | 0.319264001 | 1.45E-73 | Exhaustion_CD8.T |
| NAB1     | 0.260513467 | 2.40E-73 | Exhaustion_CD8.T |
| SPATS2L  | 0.299547526 | 9.63E-73 | Exhaustion_CD8.T |
| CD2BP2   | 0.3074475   | 1.43E-72 | Exhaustion_CD8.T |
| C12orf57 | 0.492581171 | 1.54E-72 | Exhaustion_CD8.T |
| SEM1     | 0.442841218 | 3.49E-72 | Exhaustion_CD8.T |
| GALM     | 0.297890051 | 1.66E-71 | Exhaustion_CD8.T |
| HLA-DPB1 | 0.427846382 | 1.54E-70 | Exhaustion_CD8.T |
| FGB      | 0.433355102 | 9.78E-70 | Exhaustion_CD8.T |
| FGA      | 0.335325009 | 2.13E-69 | Exhaustion_CD8.T |
| APOC2    | 0.372261146 | 2.61E-69 | Exhaustion_CD8.T |
| SMC4     | 0.378937091 | 4.04E-67 | Exhaustion_CD8.T |
| CLEC2D   | 0.417030222 | 1.57E-66 | Exhaustion_CD8.T |
| KDM5B    | 0.322526422 | 4.65E-66 | Exhaustion_CD8.T |
| DNAJA4   | 0.310601644 | 7.55E-66 | Exhaustion_CD8.T |
| NUSAP1   | 0.331920912 | 1.06E-65 | Exhaustion_CD8.T |
| UBC      | 0.430228954 | 1.09E-63 | Exhaustion_CD8.T |
| LSP1     | 0.428002956 | 1.36E-63 | Exhaustion_CD8.T |
| MPST     | 0.289067045 | 1.53E-63 | Exhaustion_CD8.T |
| LAIR2    | 0.341334508 | 4.41E-63 | Exhaustion_CD8.T |
| BTG3     | 0.427156386 | 6.17E-63 | Exhaustion_CD8.T |
| ICOS     | 0.332120604 | 9.19E-63 | Exhaustion_CD8.T |
| CSF1     | 0.262646518 | 1.59E-62 | Exhaustion_CD8.T |
| LYST     | 0.411617165 | 2.28E-62 | Exhaustion_CD8.T |
| SYNGR2   | 0.297705484 | 1.29E-61 | Exhaustion_CD8.T |
| EID1     | 0.447440129 | 3.47E-60 | Exhaustion_CD8.T |
| SFXN1    | 0.273008952 | 5.24E-60 | Exhaustion_CD8.T |
| HSPD1    | 0.937201708 | 1.08E-59 | Exhaustion_CD8.T |
| RALA     | 0.329447461 | 9.43E-59 | Exhaustion_CD8.T |
| DNAJB1   | 0.730454067 | 1.62E-58 | Exhaustion_CD8.T |
| CRIP1    | 0.425725278 | 1.65E-58 | Exhaustion_CD8.T |
| PMF1     | 0.33117566  | 2.84E-57 | Exhaustion_CD8.T |
| NME1     | 0.274602975 | 3.83E-57 | Exhaustion_CD8.T |
| APOBEC3G | 0.514681593 | 6.11E-56 | Exhaustion_CD8.T |
| PHPT1    | 0.416097749 | 2.83E-55 | Exhaustion_CD8.T |
| LSM2     | 0.368891498 | 2.09E-54 | Exhaustion_CD8.T |
| CD84     | 0.291075009 | 4.05E-54 | Exhaustion_CD8.T |
| SAMSN1   | 0.429857791 | 9.82E-54 | Exhaustion_CD8.T |
| PPP1R2   | 0.508799436 | 4.79E-53 | Exhaustion_CD8.T |
| LGALS3   | 0.2873916   | 5.64E-52 | Exhaustion_CD8.T |
| NDUFA13  | 0.369620774 | 2.61E-51 | Exhaustion_CD8.T |
| JUN      | 0.512366457 | 3.78E-51 | Exhaustion_CD8.T |

|           |             |          |                  |
|-----------|-------------|----------|------------------|
| UBB       | 0.45158401  | 1.71E-50 | Exhaustion_CD8.T |
| ANXA5     | 0.356128508 | 2.49E-49 | Exhaustion_CD8.T |
| CD63      | 0.432201849 | 3.90E-49 | Exhaustion_CD8.T |
| SELENOH   | 0.371144563 | 8.32E-49 | Exhaustion_CD8.T |
| SELENOM   | 0.282159387 | 7.40E-48 | Exhaustion_CD8.T |
| TXN       | 0.371205195 | 1.25E-47 | Exhaustion_CD8.T |
| MPC2      | 0.343191748 | 1.27E-47 | Exhaustion_CD8.T |
| HSPH1     | 0.63017115  | 8.76E-47 | Exhaustion_CD8.T |
| RABAC1    | 0.396048591 | 1.68E-46 | Exhaustion_CD8.T |
| TNFRSF18  | 0.471569375 | 3.71E-46 | Exhaustion_CD8.T |
| CDKN2A    | 0.25420881  | 5.51E-46 | Exhaustion_CD8.T |
| WDR83OS   | 0.349721373 | 1.13E-44 | Exhaustion_CD8.T |
| SRP14     | 0.312136691 | 1.51E-44 | Exhaustion_CD8.T |
| LINC00299 | 0.289005493 | 1.60E-44 | Exhaustion_CD8.T |
| ATP5MC2   | 0.317212243 | 1.93E-43 | Exhaustion_CD8.T |
| TMEM14C   | 0.276177634 | 4.89E-43 | Exhaustion_CD8.T |
| ETFB      | 0.315281519 | 5.02E-43 | Exhaustion_CD8.T |
| ATP5MC3   | 0.361286116 | 5.70E-43 | Exhaustion_CD8.T |
| RAB27A    | 0.380751819 | 7.50E-43 | Exhaustion_CD8.T |
| CALM3     | 0.383076283 | 2.42E-42 | Exhaustion_CD8.T |
| FYB1      | 0.382310515 | 9.74E-42 | Exhaustion_CD8.T |
| DNAJB4    | 0.360982708 | 1.31E-41 | Exhaustion_CD8.T |
| MSI2      | 0.278510693 | 1.49E-41 | Exhaustion_CD8.T |
| PRDX6     | 0.339680926 | 2.32E-41 | Exhaustion_CD8.T |
| HLA-DQA1  | 0.31332628  | 1.64E-40 | Exhaustion_CD8.T |
| ARID5B    | 0.340117256 | 2.46E-40 | Exhaustion_CD8.T |
| MRPL51    | 0.313083025 | 1.39E-38 | Exhaustion_CD8.T |
| NDUFV2    | 0.33444884  | 6.48E-38 | Exhaustion_CD8.T |
| ZFAND2A   | 0.435181914 | 2.48E-37 | Exhaustion_CD8.T |
| PGK1      | 0.387651886 | 2.87E-37 | Exhaustion_CD8.T |
| EVL       | 0.33962731  | 3.09E-37 | Exhaustion_CD8.T |
| PRKCA     | 0.255874565 | 4.08E-37 | Exhaustion_CD8.T |
| PRDX5     | 0.33888931  | 1.28E-36 | Exhaustion_CD8.T |
| PYCARD    | 0.292197737 | 4.17E-36 | Exhaustion_CD8.T |
| ST13      | 0.342991814 | 1.13E-35 | Exhaustion_CD8.T |
| GBP2      | 0.353061463 | 1.48E-35 | Exhaustion_CD8.T |
| TSPO      | 0.346814238 | 2.52E-35 | Exhaustion_CD8.T |
| SPCS2     | 0.290493826 | 3.00E-35 | Exhaustion_CD8.T |
| TMEM141   | 0.253484716 | 1.75E-34 | Exhaustion_CD8.T |
| C19orf53  | 0.310443268 | 4.74E-34 | Exhaustion_CD8.T |
| ZNHIT1    | 0.275596123 | 1.33E-33 | Exhaustion_CD8.T |
| SRI       | 0.302390914 | 5.31E-33 | Exhaustion_CD8.T |
| TXNDC17   | 0.255494421 | 7.43E-33 | Exhaustion_CD8.T |
| KLRK1     | 0.324332356 | 9.53E-33 | Exhaustion_CD8.T |
| S100A11   | 0.360784804 | 3.69E-32 | Exhaustion_CD8.T |
| LDHB      | 0.318576596 | 4.26E-32 | Exhaustion_CD8.T |
| COX5A     | 0.304564379 | 6.83E-32 | Exhaustion_CD8.T |
| FKBP5     | 0.284069341 | 1.75E-31 | Exhaustion_CD8.T |
| APOBEC3C  | 0.27202116  | 5.81E-31 | Exhaustion_CD8.T |
| UQCRC10   | 0.295764728 | 2.61E-30 | Exhaustion_CD8.T |
| LY6E      | 0.323796939 | 2.93E-30 | Exhaustion_CD8.T |
| TMPO      | 0.250869192 | 8.53E-30 | Exhaustion_CD8.T |
| DEDD2     | 0.25827501  | 8.70E-30 | Exhaustion_CD8.T |
| LCK       | 0.28358332  | 4.00E-29 | Exhaustion_CD8.T |
| UBE2L6    | 0.263059697 | 4.93E-29 | Exhaustion_CD8.T |
| SEPTIN1   | 0.284272344 | 5.59E-29 | Exhaustion_CD8.T |
| SEC11A    | 0.291618781 | 4.04E-28 | Exhaustion_CD8.T |
| GNG5      | 0.296924265 | 1.85E-27 | Exhaustion_CD8.T |
| ATP5MC1   | 0.266075295 | 2.19E-27 | Exhaustion_CD8.T |
| CARD16    | 0.325898429 | 2.61E-27 | Exhaustion_CD8.T |
| PDIA6     | 0.298164802 | 4.95E-27 | Exhaustion_CD8.T |
| CCL5      | 0.380307218 | 7.35E-27 | Exhaustion_CD8.T |
| CSNK2B    | 0.259960984 | 2.62E-26 | Exhaustion_CD8.T |
| RANBP1    | 0.323014043 | 2.64E-26 | Exhaustion_CD8.T |

|          |             |            |                  |
|----------|-------------|------------|------------------|
| CIB1     | 0.283695683 | 1.08E-25   | Exhaustion_CD8.T |
| POLD4    | 0.263813644 | 1.35E-25   | Exhaustion_CD8.T |
| TRBC1    | 0.703258768 | 1.93E-25   | Exhaustion_CD8.T |
| PPM1G    | 0.253114112 | 2.14E-25   | Exhaustion_CD8.T |
| NDUFC2   | 0.267625786 | 2.65E-25   | Exhaustion_CD8.T |
| GSTO1    | 0.267517661 | 4.87E-25   | Exhaustion_CD8.T |
| NUDC     | 0.290781712 | 6.16E-25   | Exhaustion_CD8.T |
| NOP10    | 0.271925309 | 1.10E-24   | Exhaustion_CD8.T |
| SDF2L1   | 0.25849613  | 1.28E-24   | Exhaustion_CD8.T |
| NSD3     | 0.291026931 | 2.47E-24   | Exhaustion_CD8.T |
| CENPX    | 0.259188136 | 4.51E-24   | Exhaustion_CD8.T |
| DYNLRB1  | 0.272941625 | 5.19E-24   | Exhaustion_CD8.T |
| COPE     | 0.286376408 | 7.92E-24   | Exhaustion_CD8.T |
| MPHOSPH8 | 0.266056036 | 1.34E-23   | Exhaustion_CD8.T |
| COX8A    | 0.272364734 | 2.09E-23   | Exhaustion_CD8.T |
| AHSA1    | 0.272760032 | 4.27E-23   | Exhaustion_CD8.T |
| MRPL18   | 0.256241543 | 4.39E-23   | Exhaustion_CD8.T |
| HSPA8    | 0.526362493 | 7.80E-23   | Exhaustion_CD8.T |
| MGST3    | 0.259011037 | 1.06E-22   | Exhaustion_CD8.T |
| SPCS1    | 0.253108099 | 2.52E-22   | Exhaustion_CD8.T |
| CLTA     | 0.259724948 | 3.35E-22   | Exhaustion_CD8.T |
| PSMB9    | 0.286057457 | 4.52E-22   | Exhaustion_CD8.T |
| ANAPC11  | 0.253407339 | 6.51E-22   | Exhaustion_CD8.T |
| LAPTM5   | 0.271118653 | 7.81E-22   | Exhaustion_CD8.T |
| ATP5F1C  | 0.256791338 | 1.08E-21   | Exhaustion_CD8.T |
| ENO1     | 0.314841913 | 1.32E-20   | Exhaustion_CD8.T |
| SLBP     | 0.271454387 | 1.61E-20   | Exhaustion_CD8.T |
| CCT4     | 0.273955421 | 3.33E-20   | Exhaustion_CD8.T |
| HSPA6    | 0.279812441 | 7.57E-20   | Exhaustion_CD8.T |
| LDHA     | 0.269983482 | 1.70E-19   | Exhaustion_CD8.T |
| PLP2     | 0.253474255 | 3.49E-18   | Exhaustion_CD8.T |
| CHORDC1  | 0.303451917 | 4.76E-18   | Exhaustion_CD8.T |
| BLOC1S1  | 0.254322454 | 5.91E-18   | Exhaustion_CD8.T |
| ARL6IP1  | 0.287888538 | 1.11E-17   | Exhaustion_CD8.T |
| NMB      | 0.484811662 | 1.35E-17   | Exhaustion_CD8.T |
| TSC22D3  | 0.263993775 | 3.57E-16   | Exhaustion_CD8.T |
| HSP90AB1 | 0.525203841 | 5.57E-16   | Exhaustion_CD8.T |
| C17orf49 | 0.27361953  | 3.77E-15   | Exhaustion_CD8.T |
| DOK2     | 0.314902852 | 7.05E-15   | Exhaustion_CD8.T |
| RAN      | 0.255271752 | 4.30E-14   | Exhaustion_CD8.T |
| CDK2AP2  | 0.261280989 | 9.70E-14   | Exhaustion_CD8.T |
| C9orf16  | 0.265167406 | 5.35E-12   | Exhaustion_CD8.T |
| XIST     | 0.340532298 | 8.78E-11   | Exhaustion_CD8.T |
| HERPUD1  | 0.3154508   | 5.11E-10   | Exhaustion_CD8.T |
| DNAJA1   | 0.367239465 | 1.50E-05   | Exhaustion_CD8.T |
| TNFSF9   | 0.340622262 | 2.46E-05   | Exhaustion_CD8.T |
| HLA-DQB1 | 0.314143655 | 0.00041786 | Exhaustion_CD8.T |
| GOLGA4   | 0.279120667 | 0.00421563 | Exhaustion_CD8.T |

---

Supplementary Table 4. Genes related to the common progenitor cell of HCC and cirrhosis (related to Fig. 5)

| P_val     | avg_log2FC  | Pct.1 | Pct.2 | P_val_adj | Gene       |
|-----------|-------------|-------|-------|-----------|------------|
| 0         | 3.697584059 | 0.954 | 0.118 | 0         | NKG7       |
| 0         | 3.079557991 | 0.922 | 0.075 | 0         | CCL5       |
| 0         | 2.920501052 | 0.971 | 0.134 | 0         | DUSP2      |
| 0         | 2.733925283 | 0.968 | 0.068 | 0         | CST7       |
| 0         | 2.283404923 | 0.959 | 0.053 | 0         | GZMA       |
| 0         | 2.181786541 | 0.905 | 0.041 | 0         | CTSW       |
| 0         | 2.064304556 | 0.862 | 0.035 | 0         | CD7        |
| 0         | 1.923354336 | 0.951 | 0.123 | 0         | HCST       |
| 0         | 1.75128566  | 0.701 | 0.034 | 0         | GZMH       |
| 0         | 1.739540845 | 0.905 | 0.094 | 0         | PTPRC      |
| 0         | 1.705769122 | 0.733 | 0.039 | 0         | KLRB1      |
| 0         | 1.679420959 | 0.743 | 0.033 | 0         | TRBC2      |
| 0         | 1.654348147 | 0.743 | 0.033 | 0         | PRF1       |
| 0         | 1.601168373 | 0.867 | 0.047 | 0         | IL2RG      |
| 0         | 1.452658182 | 0.738 | 0.039 | 0         | ALOX5AP    |
| 0         | 1.439328252 | 0.869 | 0.084 | 0         | CORO1A     |
| 0         | 1.406001891 | 0.837 | 0.077 | 0         | RAC2       |
| 0         | 1.373504642 | 0.774 | 0.028 | 0         | GZMM       |
| 0         | 1.341278908 | 0.663 | 0.025 | 0         | CD3E       |
| 0         | 1.270609743 | 0.665 | 0.025 | 0         | CD247      |
| 0         | 1.232411677 | 0.689 | 0.03  | 0         | KLRD1      |
| 0         | 1.003918161 | 0.636 | 0.019 | 0         | LCK        |
| 1.58E-307 | 1.494317595 | 0.675 | 0.037 | 2.47E-303 | CD69       |
| 1.65E-305 | 2.654410975 | 0.711 | 0.049 | 2.57E-301 | XCL2       |
| 5.57E-296 | 0.941847862 | 0.587 | 0.02  | 8.72E-292 | PTPN7      |
| 1.23E-293 | 1.020764636 | 0.66  | 0.038 | 1.92E-289 | PCED1B-AS1 |
| 8.19E-287 | 0.860464293 | 0.561 | 0.018 | 1.28E-282 | ACAP1      |
| 5.27E-283 | 1.813849814 | 0.927 | 0.153 | 8.25E-279 | ARHGDI3    |
| 3.14E-281 | 1.177075071 | 0.731 | 0.064 | 4.91E-277 | STK4       |
| 6.01E-279 | 1.292402887 | 0.779 | 0.082 | 9.39E-275 | TGFB1      |
| 3.13E-276 | 1.4542233   | 0.794 | 0.091 | 4.90E-272 | DDIT4      |
| 1.32E-271 | 1.077419177 | 0.755 | 0.071 | 2.06E-267 | LSP1       |
| 3.58E-271 | 1.776471071 | 0.619 | 0.038 | 5.60E-267 | TRBC1      |
| 1.96E-269 | 0.866399623 | 0.558 | 0.023 | 3.06E-265 | MATK       |
| 8.27E-268 | 2.141460335 | 0.922 | 0.165 | 1.29E-263 | S100A4     |
| 2.46E-267 | 1.09436058  | 0.755 | 0.074 | 3.85E-263 | CD37       |
| 1.10E-266 | 1.441191829 | 0.811 | 0.102 | 1.72E-262 | CLEC2B     |
| 1.98E-266 | 1.654949953 | 0.867 | 0.124 | 3.09E-262 | REL        |
| 5.66E-266 | 0.858753021 | 0.529 | 0.018 | 8.85E-262 | SH2D2A     |
| 5.22E-264 | 1.181142145 | 0.74  | 0.074 | 8.17E-260 | ISG20      |
| 9.07E-264 | 1.618807844 | 0.947 | 0.168 | 1.42E-259 | CYBA       |
| 1.48E-260 | 1.098130847 | 0.539 | 0.021 | 2.32E-256 | HOPX       |
| 7.89E-257 | 1.662494932 | 0.59  | 0.037 | 1.23E-252 | GZMB       |
| 2.36E-254 | 1.494229642 | 0.801 | 0.104 | 3.68E-250 | ARL4C      |
| 1.88E-251 | 1.793991676 | 0.864 | 0.155 | 2.94E-247 | CREM       |
| 6.48E-251 | 1.177380227 | 0.731 | 0.079 | 1.01E-246 | ITGB2      |
| 1.91E-249 | 1.077312707 | 0.653 | 0.054 | 2.99E-245 | LIMD2      |
| 4.84E-246 | 1.014876937 | 0.59  | 0.038 | 7.58E-242 | RUNX3      |
| 1.20E-242 | 1.049770836 | 0.502 | 0.019 | 1.88E-238 | CLIC3      |
| 2.26E-238 | 0.780032532 | 0.476 | 0.015 | 3.53E-234 | SYTL3      |
| 6.53E-237 | 1.046299849 | 0.578 | 0.04  | 1.02E-232 | CEMIP2     |
| 8.48E-237 | 0.79324081  | 0.495 | 0.02  | 1.33E-232 | RHOH       |
| 2.11E-236 | 0.852260007 | 0.529 | 0.027 | 3.30E-232 | TENT5C     |
| 2.77E-236 | 0.953717348 | 0.481 | 0.017 | 4.33E-232 | CD2        |
| 5.78E-236 | 1.110873198 | 0.672 | 0.069 | 9.04E-232 | IFITM1     |
| 1.14E-235 | 1.935983958 | 0.99  | 0.251 | 1.79E-231 | SRGN       |
| 1.48E-234 | 0.734413109 | 0.49  | 0.019 | 2.32E-230 | LBH        |
| 4.46E-234 | 0.942882384 | 0.578 | 0.039 | 6.97E-230 | CYTIP      |
| 1.87E-229 | 0.912262591 | 0.658 | 0.064 | 2.92E-225 | CD53       |
| 3.05E-229 | 1.237668686 | 0.767 | 0.105 | 4.78E-225 | EMP3       |
| 7.43E-228 | 1.05455641  | 0.638 | 0.061 | 1.16E-223 | VPS37B     |
| 1.59E-227 | 1.110001427 | 0.604 | 0.05  | 2.49E-223 | CRIP1      |



|           |             |       |       |           |           |
|-----------|-------------|-------|-------|-----------|-----------|
| 3.04E-227 | 0.848523082 | 0.609 | 0.052 | 4.76E-223 | SKAP1     |
| 3.76E-226 | 1.473708004 | 0.716 | 0.09  | 5.88E-222 | METRNL    |
| 2.18E-224 | 1.3320704   | 0.49  | 0.024 | 3.40E-220 | CD3D      |
| 2.25E-223 | 0.945488395 | 0.607 | 0.051 | 3.52E-219 | CD48      |
| 2.39E-223 | 1.522492115 | 0.854 | 0.149 | 3.74E-219 | NR4A2     |
| 5.66E-223 | 2.402338477 | 0.99  | 0.426 | 8.86E-219 | BTG1      |
| 4.70E-220 | 1.267908116 | 0.456 | 0.018 | 7.34E-216 | FGFBP2    |
| 4.33E-218 | 1.524041491 | 0.755 | 0.113 | 6.76E-214 | CXCR4     |
| 4.98E-217 | 1.29928379  | 0.449 | 0.017 | 7.79E-213 | TRAC      |
| 5.86E-213 | 0.64752755  | 0.4   | 0.009 | 9.17E-209 | PYHIN1    |
| 7.53E-213 | 0.652294488 | 0.413 | 0.011 | 1.18E-208 | KLRK1     |
| 1.58E-210 | 2.12695597  | 0.905 | 0.263 | 2.48E-206 | ZFP36L2   |
| 1.10E-209 | 0.936095222 | 0.621 | 0.067 | 1.71E-205 | STK17A    |
| 1.79E-209 | 0.717000178 | 0.495 | 0.029 | 2.81E-205 | APOBEC3G  |
| 2.15E-209 | 0.931190231 | 0.621 | 0.066 | 3.35E-205 | FYN       |
| 7.67E-209 | 0.896082272 | 0.422 | 0.014 | 1.20E-204 | TRDC      |
| 9.52E-209 | 1.13339371  | 0.784 | 0.127 | 1.49E-204 | FXDYD5    |
| 4.84E-208 | 1.771402204 | 0.985 | 0.356 | 7.57E-204 | HLA-E     |
| 5.59E-206 | 1.867263725 | 1     | 0.995 | 8.74E-202 | B2M       |
| 8.34E-205 | 1.457246013 | 0.847 | 0.185 | 1.30E-200 | IER2      |
| 6.74E-203 | 0.922449102 | 0.57  | 0.053 | 1.05E-198 | GNG2      |
| 6.16E-202 | 1.236069097 | 0.83  | 0.181 | 9.64E-198 | TLE5      |
| 3.09E-200 | 0.613439709 | 0.408 | 0.014 | 4.84E-196 | IL2RB     |
| 1.73E-199 | 1.055151455 | 0.723 | 0.115 | 2.70E-195 | KMT2E     |
| 1.38E-197 | 0.674933738 | 0.417 | 0.016 | 2.15E-193 | SPOCK2    |
| 9.74E-197 | 1.380425822 | 0.823 | 0.173 | 1.52E-192 | IRF1      |
| 1.19E-196 | 1.366976434 | 0.806 | 0.168 | 1.87E-192 | HIST1H4C  |
| 8.74E-196 | 0.739380105 | 0.488 | 0.033 | 1.37E-191 | C12orf75  |
| 1.26E-195 | 1.016489127 | 0.697 | 0.106 | 1.97E-191 | ABHD17A   |
| 4.73E-194 | 0.601863454 | 0.369 | 0.009 | 7.40E-190 | S1PR5     |
| 1.54E-193 | 0.797411196 | 0.517 | 0.041 | 2.41E-189 | SLA       |
| 1.59E-193 | 0.78348086  | 0.519 | 0.043 | 2.49E-189 | RAB8B     |
| 6.05E-193 | 0.684728845 | 0.374 | 0.01  | 9.46E-189 | NCR3      |
| 9.53E-191 | 1.821676703 | 1     | 0.837 | 1.49E-186 | HLA-B     |
| 1.51E-190 | 1.275078703 | 0.84  | 0.169 | 2.36E-186 | GSTP1     |
| 2.57E-189 | 2.768278869 | 1     | 0.774 | 4.02E-185 | MALAT1    |
| 1.74E-188 | 1.038776089 | 0.818 | 0.148 | 2.73E-184 | S100A6    |
| 1.95E-188 | 0.723670938 | 0.468 | 0.031 | 3.04E-184 | STK17B    |
| 1.95E-188 | 0.87311564  | 0.553 | 0.055 | 3.05E-184 | ADGRE5    |
| 1.11E-187 | 0.597366206 | 0.379 | 0.012 | 1.73E-183 | SH2D1A    |
| 2.08E-185 | 0.949083183 | 0.663 | 0.097 | 3.25E-181 | ELF1      |
| 1.36E-184 | 1.002852216 | 0.607 | 0.072 | 2.13E-180 | SLC2A3    |
| 4.27E-184 | 1.339091653 | 0.663 | 0.1   | 6.67E-180 | ANXA1     |
| 7.26E-184 | 0.535116299 | 0.357 | 0.009 | 1.14E-179 | CD96      |
| 4.24E-183 | 0.628240299 | 0.381 | 0.014 | 6.63E-179 | LINC01871 |
| 4.78E-183 | 0.731779983 | 0.51  | 0.043 | 7.48E-179 | ETS1      |
| 1.38E-182 | 0.677756081 | 0.517 | 0.045 | 2.15E-178 | FMNL1     |
| 3.73E-182 | 1.059254294 | 0.682 | 0.107 | 5.84E-178 | FOSL2     |
| 6.00E-182 | 0.746832368 | 0.367 | 0.012 | 9.38E-178 | CD8A      |
| 3.49E-180 | 0.714159886 | 0.381 | 0.015 | 5.45E-176 | KLRF1     |
| 3.22E-179 | 0.503892972 | 0.345 | 0.008 | 5.04E-175 | SAMD3     |
| 1.68E-177 | 0.494820007 | 0.357 | 0.011 | 2.62E-173 | TBC1D10C  |
| 8.63E-177 | 0.58330881  | 0.413 | 0.022 | 1.35E-172 | PRKCH     |
| 9.37E-177 | 0.52751934  | 0.364 | 0.012 | 1.47E-172 | STAT4     |
| 1.07E-175 | 2.054632524 | 0.99  | 0.696 | 1.67E-171 | JUND      |
| 1.19E-175 | 1.318338106 | 0.893 | 0.293 | 1.86E-171 | SARAF     |
| 1.44E-175 | 1.080385294 | 0.544 | 0.059 | 2.25E-171 | DUSP5     |
| 2.06E-175 | 0.80942565  | 0.595 | 0.075 | 3.21E-171 | GPSM3     |
| 6.62E-175 | 1.70816317  | 0.405 | 0.022 | 1.03E-170 | XCL1      |
| 9.75E-175 | 0.636775927 | 0.408 | 0.022 | 1.52E-170 | PDE7A     |
| 2.26E-174 | 1.307040868 | 0.437 | 0.029 | 3.53E-170 | AREG      |
| 9.79E-174 | 0.651727948 | 0.439 | 0.03  | 1.53E-169 | RBM38     |
| 2.50E-173 | 0.670569625 | 0.488 | 0.042 | 3.91E-169 | BIN2      |
| 7.27E-173 | 0.969235731 | 0.723 | 0.141 | 1.14E-168 | EVL       |

|           |             |       |       |           |          |
|-----------|-------------|-------|-------|-----------|----------|
| 2.46E-172 | 0.86244793  | 0.536 | 0.056 | 3.85E-168 | GIMAP7   |
| 4.10E-172 | 0.567358429 | 0.364 | 0.014 | 6.42E-168 | SLC38A1  |
| 1.67E-170 | 0.802906841 | 0.5   | 0.049 | 2.61E-166 | DOK2     |
| 7.65E-170 | 2.858584025 | 0.937 | 0.403 | 1.20E-165 | CCL4     |
| 8.44E-170 | 0.695580795 | 0.447 | 0.033 | 1.32E-165 | GPR65    |
| 9.08E-170 | 0.880968053 | 0.585 | 0.076 | 1.42E-165 | EZR      |
| 1.51E-169 | 1.662372734 | 0.968 | 0.445 | 2.37E-165 | SH3BGLR3 |
| 1.61E-169 | 0.51223362  | 0.352 | 0.012 | 2.51E-165 | LAT      |
| 1.07E-167 | 0.891063355 | 0.595 | 0.084 | 1.67E-163 | RORA     |
| 1.90E-167 | 0.711464587 | 0.425 | 0.029 | 2.97E-163 | PLAC8    |
| 8.02E-167 | 0.631727907 | 0.325 | 0.008 | 1.25E-162 | CD3G     |
| 3.81E-165 | 1.784416489 | 0.437 | 0.036 | 5.96E-161 | GZMK     |
| 1.08E-164 | 0.503204392 | 0.33  | 0.01  | 1.69E-160 | PTPN22   |
| 1.68E-164 | 0.718081051 | 0.534 | 0.061 | 2.63E-160 | WIPF1    |
| 2.19E-164 | 0.805032292 | 0.609 | 0.084 | 3.42E-160 | FYB1     |
| 1.58E-163 | 0.678148829 | 0.415 | 0.028 | 2.47E-159 | TAGAP    |
| 1.84E-163 | 0.883413714 | 0.706 | 0.124 | 2.88E-159 | GMFG     |
| 1.32E-162 | 1.155077279 | 0.364 | 0.018 | 2.06E-158 | IFNG     |
| 2.55E-161 | 1.00052058  | 0.726 | 0.148 | 3.99E-157 | CTSC     |
| 1.43E-160 | 0.904983459 | 0.68  | 0.127 | 2.24E-156 | UBE2S    |
| 1.76E-160 | 0.628355194 | 0.408 | 0.028 | 2.75E-156 | AKNA     |
| 4.24E-160 | 0.946609365 | 0.718 | 0.146 | 6.64E-156 | FUS      |
| 1.33E-159 | 0.769316244 | 0.609 | 0.091 | 2.08E-155 | PPDPF    |
| 7.80E-159 | 0.808374467 | 0.595 | 0.09  | 1.22E-154 | PRPF38B  |
| 1.55E-157 | 0.535198928 | 0.333 | 0.012 | 2.43E-153 | TIGIT    |
| 5.26E-157 | 1.680427548 | 0.998 | 0.614 | 8.23E-153 | TMSB10   |
| 1.50E-156 | 0.618087497 | 0.359 | 0.018 | 2.35E-152 | CLEC2D   |
| 2.00E-156 | 0.620268419 | 0.381 | 0.023 | 3.12E-152 | CCND2    |
| 2.25E-156 | 0.739426492 | 0.556 | 0.076 | 3.52E-152 | LDHB     |
| 7.52E-156 | 0.525734021 | 0.313 | 0.01  | 1.18E-151 | BCL11B   |
| 2.38E-155 | 0.507904579 | 0.294 | 0.006 | 3.73E-151 | KLRC3    |
| 6.01E-153 | 1.701840554 | 1     | 0.562 | 9.39E-149 | TMSB4X   |
| 3.97E-152 | 0.626212626 | 0.437 | 0.04  | 6.20E-148 | ITGA4    |
| 5.76E-152 | 1.788108456 | 0.915 | 0.327 | 9.01E-148 | JUNB     |
| 1.71E-151 | 0.582306969 | 0.449 | 0.042 | 2.67E-147 | APBB1IP  |
| 1.74E-151 | 0.898533652 | 0.592 | 0.097 | 2.72E-147 | LEPROTL1 |
| 2.49E-151 | 1.308606233 | 0.636 | 0.116 | 3.90E-147 | ZNF331   |
| 2.77E-150 | 1.006363403 | 0.473 | 0.051 | 4.34E-146 | CD52     |
| 3.84E-150 | 0.707274783 | 0.553 | 0.077 | 6.01E-146 | FLNA     |
| 1.74E-148 | 1.318662531 | 0.993 | 0.684 | 2.72E-144 | HLA-C    |
| 2.90E-148 | 0.789893612 | 0.604 | 0.095 | 4.54E-144 | LCP1     |
| 1.04E-147 | 0.470157497 | 0.333 | 0.015 | 1.62E-143 | RHOF     |
| 3.30E-147 | 0.67725799  | 0.539 | 0.074 | 5.16E-143 | PPP1R18  |
| 1.85E-146 | 0.929228341 | 0.658 | 0.133 | 2.89E-142 | SRSF7    |
| 1.89E-146 | 1.235187255 | 0.964 | 0.473 | 2.96E-142 | ARPC2    |
| 2.26E-146 | 0.408892665 | 0.282 | 0.007 | 3.54E-142 | FCRL6    |
| 5.10E-146 | 1.188131369 | 1     | 0.968 | 7.97E-142 | PFN1     |
| 8.18E-146 | 2.834324056 | 0.481 | 0.064 | 1.28E-141 | GNLY     |
| 8.97E-146 | 0.476620649 | 0.303 | 0.011 | 1.40E-141 | MYBL1    |
| 2.07E-145 | 1.115587156 | 0.602 | 0.1   | 3.24E-141 | RGCC     |
| 1.05E-144 | 1.043084441 | 0.794 | 0.227 | 1.65E-140 | DDX24    |
| 1.38E-144 | 0.422973318 | 0.272 | 0.005 | 2.15E-140 | FASLG    |
| 1.39E-143 | 0.700059028 | 0.502 | 0.065 | 2.18E-139 | CDC42SE2 |
| 3.08E-143 | 0.612982487 | 0.442 | 0.045 | 4.81E-139 | C5orf56  |
| 5.16E-143 | 0.397838238 | 0.267 | 0.005 | 8.07E-139 | TBX21    |
| 8.16E-143 | 0.749897735 | 0.306 | 0.012 | 1.28E-138 | TRGC2    |
| 4.17E-142 | 1.290741214 | 0.988 | 0.719 | 6.52E-138 | MYL12A   |
| 1.00E-141 | 1.177199284 | 1     | 0.925 | 1.57E-137 | H3F3B    |
| 1.38E-140 | 0.409412824 | 0.282 | 0.008 | 2.16E-136 | ZAP70    |
| 2.13E-140 | 0.792620279 | 0.6   | 0.106 | 3.33E-136 | PNISR    |
| 7.56E-140 | 0.698317796 | 0.51  | 0.07  | 1.18E-135 | CNOT6L   |
| 3.77E-139 | 0.873070841 | 0.575 | 0.099 | 5.89E-135 | RSRP1    |
| 7.66E-139 | 0.481329707 | 0.299 | 0.012 | 1.20E-134 | KLRG1    |
| 1.29E-138 | 0.770064558 | 0.461 | 0.054 | 2.02E-134 | TUBA4A   |

|           |             |       |       |           |            |
|-----------|-------------|-------|-------|-----------|------------|
| 1.44E-138 | 1.265269037 | 0.942 | 0.488 | 2.26E-134 | CLIC1      |
| 1.12E-137 | 0.463219251 | 0.325 | 0.018 | 1.74E-133 | IL27RA     |
| 1.66E-137 | 0.900759983 | 0.663 | 0.145 | 2.59E-133 | BRD2       |
| 3.85E-137 | 0.701747014 | 0.536 | 0.083 | 6.02E-133 | CD47       |
| 1.74E-135 | 1.224873265 | 0.985 | 0.747 | 2.72E-131 | CFL1       |
| 2.13E-135 | 0.777716497 | 0.709 | 0.147 | 3.34E-131 | GYPC       |
| 9.22E-135 | 1.10916417  | 0.638 | 0.128 | 1.44E-130 | TNFAIP3    |
| 2.93E-134 | 0.788255179 | 0.609 | 0.118 | 4.59E-130 | RBM25      |
| 3.92E-134 | 0.891950264 | 0.553 | 0.091 | 6.14E-130 | BTG2       |
| 2.61E-133 | 0.877638716 | 0.694 | 0.164 | 4.08E-129 | ARL6IP5    |
| 2.87E-133 | 1.069481889 | 0.587 | 0.109 | 4.49E-129 | ATP1B3     |
| 5.29E-133 | 0.591280953 | 0.398 | 0.038 | 8.28E-129 | SOC3       |
| 1.14E-132 | 0.582885574 | 0.442 | 0.052 | 1.79E-128 | CCND3      |
| 1.64E-132 | 0.515945711 | 0.34  | 0.023 | 2.56E-128 | CHST12     |
| 3.38E-132 | 1.235380787 | 0.978 | 0.674 | 5.29E-128 | CALM1      |
| 1.01E-131 | 1.057995409 | 0.765 | 0.231 | 1.58E-127 | RBM39      |
| 2.99E-131 | 0.840479918 | 0.658 | 0.138 | 4.67E-127 | LY6E       |
| 4.32E-130 | 0.989746384 | 0.728 | 0.2   | 6.76E-126 | JAK1       |
| 1.17E-129 | 0.565087098 | 0.43  | 0.049 | 1.82E-125 | SEPTIN6    |
| 2.40E-129 | 0.618718961 | 0.481 | 0.067 | 3.76E-125 | NSD3       |
| 4.15E-129 | 1.299470406 | 0.981 | 0.74  | 6.48E-125 | HLA-A      |
| 5.51E-129 | 0.868159806 | 0.76  | 0.209 | 8.61E-125 | SON        |
| 5.88E-129 | 0.888225586 | 0.772 | 0.219 | 9.19E-125 | YWHAZ      |
| 9.37E-129 | 0.385217941 | 0.265 | 0.008 | 1.47E-124 | IKZF3      |
| 7.23E-128 | 0.70918058  | 0.57  | 0.106 | 1.13E-123 | HLA-F      |
| 2.79E-127 | 0.946433982 | 0.748 | 0.221 | 4.37E-123 | SEPTIN7    |
| 8.50E-127 | 0.610709304 | 0.456 | 0.06  | 1.33E-122 | PPP1R12A   |
| 2.67E-126 | 1.071721271 | 0.922 | 0.434 | 4.17E-122 | CD99       |
| 4.94E-126 | 0.549854721 | 0.478 | 0.067 | 7.72E-122 | CSK        |
| 5.26E-126 | 0.582739812 | 0.371 | 0.033 | 8.23E-122 | ITM2A      |
| 6.02E-126 | 0.907598128 | 0.376 | 0.035 | 9.41E-122 | RGS1       |
| 2.47E-125 | 0.609073027 | 0.26  | 0.009 | 3.86E-121 | CXCR6      |
| 1.21E-124 | 0.51772002  | 0.362 | 0.032 | 1.89E-120 | AOAH       |
| 1.77E-124 | 0.714084013 | 0.466 | 0.067 | 2.77E-120 | RNF19A     |
| 6.26E-124 | 0.442535509 | 0.245 | 0.007 | 9.78E-120 | TRGC1      |
| 9.00E-124 | 0.785600283 | 0.556 | 0.104 | 1.41E-119 | AKAP13     |
| 1.94E-123 | 0.655250997 | 0.493 | 0.078 | 3.04E-119 | TAP1       |
| 1.97E-123 | 0.656398887 | 0.444 | 0.058 | 3.09E-119 | SYNE2      |
| 2.18E-123 | 0.386863146 | 0.269 | 0.011 | 3.41E-119 | ADAM8      |
| 4.15E-123 | 0.414047798 | 0.301 | 0.018 | 6.49E-119 | PARP8      |
| 6.17E-123 | 0.760475149 | 0.517 | 0.087 | 9.64E-119 | TSC22D3    |
| 9.38E-123 | 0.589838143 | 0.451 | 0.061 | 1.47E-118 | ARHGEF1    |
| 1.51E-122 | 0.651423979 | 0.252 | 0.008 | 2.36E-118 | CD8B       |
| 1.05E-121 | 0.850123743 | 0.59  | 0.121 | 1.64E-117 | ANKRD12    |
| 1.38E-121 | 0.665691545 | 0.529 | 0.093 | 2.15E-117 | SEPTIN1    |
| 5.14E-121 | 0.773530498 | 0.549 | 0.104 | 8.04E-117 | ARID4B     |
| 1.42E-120 | 0.398489175 | 0.296 | 0.018 | 2.22E-116 | AC245297.3 |
| 2.42E-120 | 0.858478486 | 0.701 | 0.192 | 3.78E-116 | DNAJB6     |
| 2.45E-120 | 0.532298151 | 0.379 | 0.04  | 3.83E-116 | PIP4K2A    |
| 4.55E-120 | 0.723198856 | 0.621 | 0.135 | 7.11E-116 | MSN        |
| 8.75E-120 | 0.404223227 | 0.294 | 0.017 | 1.37E-115 | DENND2D    |
| 1.11E-119 | 0.572555463 | 0.243 | 0.007 | 1.73E-115 | KLRC1      |
| 2.30E-119 | 1.027780565 | 0.881 | 0.373 | 3.59E-115 | PLAAT4     |
| 5.15E-119 | 0.482369487 | 0.357 | 0.033 | 8.05E-115 | CDKN2D     |
| 1.05E-118 | 0.329548903 | 0.214 | 0.003 | 1.64E-114 | EOMES      |
| 1.17E-118 | 0.582409397 | 0.449 | 0.063 | 1.83E-114 | AAK1       |
| 2.49E-117 | 0.751670651 | 0.493 | 0.084 | 3.90E-113 | PDCC4      |
| 1.75E-116 | 1.085732763 | 0.968 | 0.663 | 2.73E-112 | OAZ1       |
| 5.73E-116 | 0.413577197 | 0.252 | 0.01  | 8.96E-112 | TRG-AS1    |
| 3.77E-115 | 0.684782341 | 0.507 | 0.089 | 5.89E-111 | SERTAD1    |
| 9.92E-115 | 0.691181853 | 0.539 | 0.106 | 1.55E-110 | CDC42SE1   |
| 2.59E-114 | 0.391128455 | 0.272 | 0.015 | 4.05E-110 | ITGB7      |
| 1.25E-113 | 0.475252584 | 0.35  | 0.034 | 1.95E-109 | RAB27A     |
| 2.46E-113 | 0.415131145 | 0.25  | 0.011 | 3.85E-109 | PDE4D      |

|           |             |       |       |           |             |
|-----------|-------------|-------|-------|-----------|-------------|
| 3.16E-113 | 1.176203325 | 0.325 | 0.028 | 4.94E-109 | LTB         |
| 3.59E-112 | 0.697875523 | 0.466 | 0.075 | 5.62E-108 | BAZ1A       |
| 4.23E-112 | 0.691564606 | 0.488 | 0.086 | 6.61E-108 | DHX36       |
| 7.93E-112 | 0.886219306 | 0.631 | 0.16  | 1.24E-107 | EFHD2       |
| 2.75E-111 | 0.334699382 | 0.216 | 0.005 | 4.30E-107 | TC2N        |
| 5.51E-111 | 0.60485638  | 0.381 | 0.045 | 8.61E-107 | PDE4B       |
| 1.07E-110 | 0.325661097 | 0.24  | 0.01  | 1.67E-106 | SYTL1       |
| 1.70E-110 | 0.769017019 | 0.454 | 0.07  | 2.66E-106 | SAMSN1      |
| 6.21E-110 | 0.398344654 | 0.204 | 0.004 | 9.70E-106 | LAIR2       |
| 7.73E-110 | 0.291447746 | 0.214 | 0.005 | 1.21E-105 | CD6         |
| 2.27E-109 | 0.440222236 | 0.308 | 0.025 | 3.55E-105 | SPN         |
| 4.85E-109 | 0.662893654 | 0.476 | 0.079 | 7.58E-105 | UCP2        |
| 6.27E-109 | 0.409935066 | 0.233 | 0.009 | 9.81E-105 | LAG3        |
| 1.42E-108 | 1.013430576 | 0.937 | 0.512 | 2.23E-104 | PNRC1       |
| 2.00E-107 | 0.500729053 | 0.383 | 0.048 | 3.13E-103 | CELF2       |
| 4.00E-107 | 0.614664144 | 0.485 | 0.084 | 6.25E-103 | CARD16      |
| 7.36E-107 | 0.594341848 | 0.434 | 0.067 | 1.15E-102 | LINC-PINT   |
| 8.47E-107 | 0.304886047 | 0.201 | 0.004 | 1.32E-102 | PRKCQ-AS1   |
| 2.29E-106 | 0.544117585 | 0.228 | 0.009 | 3.58E-102 | MYOM2       |
| 1.68E-105 | 0.468405077 | 0.248 | 0.013 | 2.63E-101 | CD160       |
| 1.76E-105 | 0.679342811 | 0.558 | 0.124 | 2.76E-101 | TERF2IP     |
| 1.80E-105 | 0.320840533 | 0.209 | 0.005 | 2.81E-101 | GATA3       |
| 2.54E-105 | 0.349692998 | 0.223 | 0.008 | 3.97E-101 | RASGRP1     |
| 4.42E-105 | 0.270602572 | 0.194 | 0.003 | 6.91E-101 | PPP2R2B     |
| 8.58E-105 | 1.093064623 | 1     | 0.989 | 1.34E-100 | ACTB        |
| 2.79E-102 | 0.389706403 | 0.274 | 0.02  | 4.36E-98  | ODF2L       |
| 3.23E-102 | 0.661972722 | 0.612 | 0.149 | 5.05E-98  | RHOG        |
| 3.24E-102 | 0.964259814 | 0.859 | 0.377 | 5.06E-98  | H2AFZ       |
| 3.72E-102 | 0.348049436 | 0.255 | 0.015 | 5.82E-98  | RASAL3      |
| 6.75E-102 | 0.506224487 | 0.34  | 0.038 | 1.06E-97  | TIPARP      |
| 2.14E-101 | 1.041547693 | 0.791 | 0.313 | 3.35E-97  | LITAF       |
| 2.96E-101 | 0.58022645  | 0.466 | 0.082 | 4.62E-97  | IFI16       |
| 4.21E-101 | 0.749117756 | 0.655 | 0.189 | 6.58E-97  | RAP1B       |
| 8.05E-101 | 0.303637582 | 0.182 | 0.003 | 1.26E-96  | LINC00299   |
| 8.20E-101 | 0.363322426 | 0.223 | 0.01  | 1.28E-96  | CD38        |
| 1.61E-100 | 0.60640509  | 0.527 | 0.105 | 2.52E-96  | PLEK        |
| 2.58E-100 | 0.591330853 | 0.507 | 0.099 | 4.03E-96  | SELENOW     |
| 2.76E-100 | 0.679542551 | 0.566 | 0.134 | 4.32E-96  | APMAP       |
| 1.51E-99  | 0.591347649 | 0.442 | 0.076 | 2.36E-95  | CHD1        |
| 1.53E-99  | 0.644548456 | 0.556 | 0.132 | 2.39E-95  | PAXX        |
| 3.57E-99  | 0.573077545 | 0.578 | 0.127 | 5.58E-95  | LAPTM5      |
| 4.76E-99  | 0.363460548 | 0.279 | 0.022 | 7.45E-95  | LPXN        |
| 5.78E-99  | 0.495657238 | 0.383 | 0.054 | 9.04E-95  | SMCHD1      |
| 1.08E-98  | 2.030379795 | 0.82  | 0.392 | 1.69E-94  | CCL4L2      |
| 1.10E-98  | 0.488885569 | 0.396 | 0.059 | 1.73E-94  | SH3KBP1     |
| 1.28E-98  | 0.493399983 | 0.367 | 0.048 | 2.01E-94  | GIMAP5      |
| 1.44E-97  | 0.872425829 | 0.585 | 0.162 | 2.25E-93  | YPEL5       |
| 1.10E-96  | 0.412931993 | 0.318 | 0.034 | 1.72E-92  | DOCK8       |
| 1.54E-96  | 0.950284467 | 0.502 | 0.105 | 2.42E-92  | KLF2        |
| 3.28E-96  | 0.517522582 | 0.42  | 0.068 | 5.13E-92  | HCLS1       |
| 4.43E-96  | 0.814792884 | 1     | 0.987 | 6.93E-92  | PTMA        |
| 7.41E-96  | 0.433966184 | 0.313 | 0.033 | 1.16E-91  | PTGER4      |
| 1.61E-95  | 0.351785377 | 0.243 | 0.015 | 2.51E-91  | FCMR        |
| 2.57E-95  | 0.980967194 | 0.993 | 0.906 | 4.02E-91  | ACTG1       |
| 4.43E-95  | 0.50040341  | 0.434 | 0.074 | 6.93E-91  | IQGAP1      |
| 5.97E-95  | 0.660179597 | 0.546 | 0.131 | 9.34E-91  | UBALD2      |
| 8.47E-95  | 0.359852658 | 0.243 | 0.016 | 1.32E-90  | AUTS2       |
| 1.06E-94  | 0.330337686 | 0.25  | 0.017 | 1.66E-90  | TRAF3IP3    |
| 1.13E-94  | 0.396566604 | 0.296 | 0.029 | 1.77E-90  | SUN2        |
| 1.23E-94  | 0.914993325 | 0.519 | 0.123 | 1.93E-90  | PIK3R1      |
| 1.52E-94  | 0.421452382 | 0.323 | 0.037 | 2.38E-90  | THUMPD3-AS1 |
| 5.52E-94  | 0.735721457 | 0.631 | 0.18  | 8.64E-90  | PRRC2C      |
| 1.43E-93  | 0.642162566 | 0.563 | 0.145 | 2.23E-89  | O STF1      |
| 2.90E-93  | 0.358660986 | 0.267 | 0.022 | 4.54E-89  | ARHGAP9     |

|          |              |       |       |          |           |
|----------|--------------|-------|-------|----------|-----------|
| 6.85E-93 | 0.489793428  | 0.318 | 0.037 | 1.07E-88 | CD300A    |
| 1.11E-92 | 0.515891838  | 0.345 | 0.046 | 1.74E-88 | LYAR      |
| 1.47E-92 | 0.370880675  | 0.269 | 0.023 | 2.29E-88 | ARAP2     |
| 2.25E-92 | 0.614363162  | 0.51  | 0.113 | 3.52E-88 | ARGLU1    |
| 2.53E-92 | 0.504568867  | 0.398 | 0.063 | 3.96E-88 | CD44      |
| 2.55E-92 | 0.472385398  | 0.197 | 0.007 | 3.99E-88 | TKTL1     |
| 2.94E-92 | 0.607600276  | 0.4   | 0.066 | 4.59E-88 | HMGB2     |
| 5.04E-92 | 0.4922241663 | 0.301 | 0.033 | 7.89E-88 | TSPYL2    |
| 8.37E-92 | 0.936828767  | 0.745 | 0.255 | 1.31E-87 | ZFP36     |
| 1.95E-91 | 0.523578131  | 0.347 | 0.047 | 3.05E-87 | ZC3H12A   |
| 2.39E-91 | 0.918529098  | 0.701 | 0.224 | 3.74E-87 | TYROBP    |
| 4.00E-91 | 0.400220942  | 0.306 | 0.034 | 6.25E-87 | RNF168    |
| 1.18E-90 | 0.335899267  | 0.226 | 0.014 | 1.84E-86 | IL16      |
| 1.20E-90 | 0.645684773  | 0.524 | 0.124 | 1.88E-86 | GPBP1     |
| 2.50E-90 | 0.671335501  | 0.648 | 0.189 | 3.91E-86 | LRRFIP1   |
| 3.28E-90 | 0.251574548  | 0.175 | 0.004 | 5.13E-86 | TOX       |
| 1.18E-89 | 0.471136404  | 0.35  | 0.049 | 1.85E-85 | UTRN      |
| 1.35E-89 | 0.268768441  | 0.187 | 0.006 | 2.10E-85 | ATP8A1    |
| 1.42E-89 | 0.387209343  | 0.277 | 0.027 | 2.22E-85 | RALGAPA1  |
| 1.77E-89 | 0.775582536  | 0.653 | 0.215 | 2.77E-85 | CCDC107   |
| 2.36E-89 | 0.50141763   | 0.403 | 0.069 | 3.69E-85 | BOD1L1    |
| 2.42E-89 | 0.906141467  | 0.803 | 0.371 | 3.78E-85 | SELENOK   |
| 3.68E-89 | 0.281749786  | 0.218 | 0.012 | 5.75E-85 | CCDC88C   |
| 5.37E-89 | 0.562226363  | 0.437 | 0.082 | 8.39E-85 | TNFRSF1B  |
| 6.85E-89 | 0.419680361  | 0.335 | 0.044 | 1.07E-84 | PRDM1     |
| 7.29E-89 | 0.279947942  | 0.211 | 0.011 | 1.14E-84 | PSTPIP1   |
| 7.88E-89 | 0.573453982  | 0.425 | 0.079 | 1.23E-84 | CD55      |
| 1.22E-88 | 0.333338195  | 0.25  | 0.02  | 1.90E-84 | MYO1G     |
| 1.26E-88 | 0.454365181  | 0.265 | 0.024 | 1.96E-84 | ENC1      |
| 1.37E-88 | 0.475055899  | 0.362 | 0.054 | 2.14E-84 | CYLD      |
| 1.43E-88 | 0.606285713  | 0.585 | 0.161 | 2.24E-84 | SF1       |
| 1.84E-88 | 0.321455767  | 0.243 | 0.018 | 2.87E-84 | PTPN4     |
| 2.90E-88 | 0.633777941  | 0.58  | 0.158 | 4.54E-84 | ARF6      |
| 4.52E-88 | 0.924980743  | 0.772 | 0.327 | 7.07E-84 | NFE2L2    |
| 5.00E-88 | 0.433256711  | 0.267 | 0.025 | 7.81E-84 | SATB1     |
| 1.67E-87 | 0.696189146  | 0.604 | 0.172 | 2.62E-83 | RNF213    |
| 2.37E-87 | 0.630091029  | 0.507 | 0.111 | 3.70E-83 | KDM6B     |
| 3.10E-87 | 0.582346424  | 0.481 | 0.104 | 4.85E-83 | TPM4      |
| 3.30E-87 | 0.378967989  | 0.211 | 0.012 | 5.15E-83 | TNFSF9    |
| 5.17E-87 | 0.408368906  | 0.313 | 0.039 | 8.09E-83 | WAS       |
| 5.76E-87 | 0.368897465  | 0.269 | 0.026 | 9.01E-83 | ABI3      |
| 7.56E-87 | 0.59949677   | 0.42  | 0.077 | 1.18E-82 | ZEB2      |
| 1.26E-86 | 0.547307401  | 0.478 | 0.104 | 1.97E-82 | SLC3A2    |
| 1.33E-86 | 0.409877738  | 0.33  | 0.045 | 2.09E-82 | CCSER2    |
| 1.60E-86 | 0.822201184  | 0.694 | 0.24  | 2.50E-82 | MCL1      |
| 4.40E-86 | 0.589292906  | 0.51  | 0.124 | 6.88E-82 | LINC01578 |
| 5.57E-86 | 0.695571432  | 0.665 | 0.223 | 8.71E-82 | ACTR3     |
| 5.87E-86 | 0.524513162  | 0.415 | 0.078 | 9.18E-82 | MYCBP2    |
| 1.04E-85 | 0.344610325  | 0.272 | 0.027 | 1.62E-81 | ITGAL     |
| 1.18E-85 | 0.531275053  | 0.413 | 0.078 | 1.85E-81 | G3BP2     |
| 1.24E-85 | 0.425324383  | 0.32  | 0.042 | 1.94E-81 | IKZF1     |
| 1.59E-85 | 0.770778917  | 0.733 | 0.242 | 2.49E-81 | VIM       |
| 1.85E-85 | 0.362598245  | 0.272 | 0.027 | 2.90E-81 | ANKRD44   |
| 1.18E-84 | 0.55583807   | 0.536 | 0.137 | 1.84E-80 | NCOR1     |
| 1.45E-84 | 0.421272353  | 0.325 | 0.044 | 2.27E-80 | GIMAP1    |
| 1.60E-84 | 0.805113201  | 0.998 | 0.988 | 2.50E-80 | RPS19     |
| 2.73E-84 | 0.880061001  | 0.964 | 0.702 | 4.28E-80 | UBC       |
| 6.01E-84 | 0.529805793  | 0.432 | 0.086 | 9.41E-80 | CCNH      |
| 1.44E-83 | 0.298062644  | 0.223 | 0.016 | 2.25E-79 | SAMD9     |
| 1.48E-83 | 0.455189762  | 0.33  | 0.048 | 2.31E-79 | NSMCE3    |
| 1.82E-83 | 0.609583557  | 1     | 0.997 | 2.84E-79 | FAU       |
| 2.66E-83 | 0.912830096  | 0.757 | 0.307 | 4.16E-79 | DDX5      |
| 4.87E-83 | 0.630332017  | 0.587 | 0.17  | 7.62E-79 | SRSF11    |
| 6.98E-83 | 0.444831548  | 0.299 | 0.037 | 1.09E-78 | PCSK7     |

|          |             |       |       |          |            |
|----------|-------------|-------|-------|----------|------------|
| 9.21E-83 | 0.367365931 | 0.296 | 0.036 | 1.44E-78 | TLE4       |
| 4.57E-82 | 0.528758616 | 0.42  | 0.084 | 7.15E-78 | ANKRD11    |
| 5.52E-82 | 0.721579783 | 0.575 | 0.176 | 8.64E-78 | PPP2R5C    |
| 3.31E-81 | 0.730297    | 0.471 | 0.105 | 5.17E-77 | FCGR3A     |
| 4.67E-81 | 0.47584712  | 0.316 | 0.044 | 7.31E-77 | ZBTB1      |
| 2.23E-80 | 0.756358702 | 0.944 | 0.601 | 3.48E-76 | ARPC3      |
| 3.09E-80 | 0.349003334 | 0.243 | 0.022 | 4.83E-76 | EMB        |
| 8.35E-80 | 0.676913115 | 0.602 | 0.187 | 1.31E-75 | TUBB4B     |
| 3.77E-79 | 0.532441066 | 0.444 | 0.1   | 5.89E-75 | FGFR10P2   |
| 6.56E-79 | 0.437218878 | 0.333 | 0.051 | 1.03E-74 | GLIPR1     |
| 9.73E-79 | 0.328857105 | 0.245 | 0.023 | 1.52E-74 | AC008875.3 |
| 1.73E-78 | 0.305717259 | 0.214 | 0.016 | 2.70E-74 | AC092821.3 |
| 2.63E-78 | 0.347499838 | 0.272 | 0.031 | 4.11E-74 | ARHGAP30   |
| 2.64E-78 | 0.400964124 | 0.359 | 0.061 | 4.13E-74 | PITPNC1    |
| 3.00E-78 | 0.284171823 | 0.167 | 0.006 | 4.68E-74 | HSH2D      |
| 3.62E-78 | 0.4585629   | 0.386 | 0.072 | 5.66E-74 | GCC2       |
| 5.11E-78 | 0.484047179 | 0.393 | 0.076 | 7.99E-74 | IFRD1      |
| 5.20E-78 | 0.45277788  | 0.364 | 0.064 | 8.14E-74 | RELB       |
| 1.60E-77 | 0.320743882 | 0.782 | 0.255 | 2.50E-73 | NEAT1      |
| 1.89E-77 | 0.334503668 | 0.24  | 0.023 | 2.96E-73 | RASA2      |
| 2.36E-77 | 0.620714584 | 1     | 0.996 | 3.70E-73 | RPS3       |
| 4.41E-77 | 0.463234501 | 0.374 | 0.071 | 6.89E-73 | JMJD6      |
| 5.06E-77 | 0.322252705 | 0.146 | 0.003 | 7.91E-73 | KLRC2      |
| 8.76E-77 | 0.510352938 | 0.488 | 0.123 | 1.37E-72 | GTF2B      |
| 1.21E-76 | 0.280468676 | 0.189 | 0.011 | 1.89E-72 | SASH3      |
| 2.78E-76 | 0.377036219 | 0.699 | 0.217 | 4.35E-72 | HLA-DRB1   |
| 3.07E-76 | 0.409350665 | 0.362 | 0.065 | 4.80E-72 | SLBP       |
| 4.15E-76 | 0.328346822 | 0.197 | 0.013 | 6.49E-72 | GBP5       |
| 8.62E-76 | 0.40341969  | 0.335 | 0.054 | 1.35E-71 | FERMT3     |
| 1.32E-75 | 0.293710777 | 0.216 | 0.018 | 2.07E-71 | DEF6       |
| 3.20E-75 | 0.258279086 | 0.18  | 0.01  | 5.01E-71 | AC008105.3 |
| 3.58E-75 | 0.277074983 | 0.206 | 0.015 | 5.60E-71 | TMEM243    |
| 3.81E-75 | 0.309721318 | 0.209 | 0.016 | 5.96E-71 | GPRIN3     |
| 4.10E-75 | 0.565319672 | 0.507 | 0.137 | 6.41E-71 | LUC7L3     |
| 5.19E-75 | 0.484679648 | 0.354 | 0.063 | 8.12E-71 | GIMAP4     |
| 5.32E-75 | 0.342959016 | 0.248 | 0.026 | 8.32E-71 | SYNE1      |
| 6.33E-75 | 0.690809211 | 0.995 | 0.918 | 9.90E-71 | MYL6       |
| 6.53E-75 | 0.930013659 | 0.677 | 0.271 | 1.02E-70 | FAM177A1   |
| 2.08E-74 | 0.457837582 | 0.4   | 0.083 | 3.25E-70 | IDS        |
| 2.22E-74 | 0.592793477 | 0.515 | 0.144 | 3.48E-70 | SRSF2      |
| 2.58E-74 | 0.335418428 | 0.245 | 0.026 | 4.03E-70 | TESC       |
| 2.72E-74 | 0.334906744 | 0.25  | 0.027 | 4.26E-70 | CCDC186    |
| 3.07E-74 | 0.285799713 | 0.206 | 0.016 | 4.80E-70 | GTF3C1     |
| 3.65E-74 | 0.438270391 | 0.413 | 0.087 | 5.71E-70 | PKM        |
| 1.19E-73 | 0.662816822 | 0.631 | 0.221 | 1.87E-69 | SFPQ       |
| 1.27E-73 | 0.310268365 | 0.221 | 0.02  | 1.99E-69 | SELPLG     |
| 4.13E-73 | 0.260086198 | 0.153 | 0.005 | 6.46E-69 | TMIGD2     |
| 9.39E-73 | 0.456630468 | 0.367 | 0.071 | 1.47E-68 | CDKN1B     |
| 1.16E-72 | 0.612194595 | 0.444 | 0.109 | 1.82E-68 | SMAP2      |
| 1.99E-72 | 0.488018402 | 0.369 | 0.071 | 3.11E-68 | MYADM      |
| 2.37E-72 | 0.295474849 | 0.211 | 0.018 | 3.71E-68 | ADGRG1     |
| 2.65E-72 | 0.472091456 | 0.333 | 0.058 | 4.15E-68 | KMT2A      |
| 2.83E-72 | 0.506201005 | 0.451 | 0.111 | 4.42E-68 | N4BP2L2    |
| 3.25E-72 | 0.373185696 | 0.286 | 0.04  | 5.09E-68 | ERN1       |
| 5.58E-72 | 0.548432386 | 0.5   | 0.135 | 8.72E-68 | TLN1       |
| 7.18E-72 | 0.369526735 | 0.284 | 0.04  | 1.12E-67 | FNBP4      |
| 1.17E-71 | 0.975352716 | 0.461 | 0.131 | 1.82E-67 | SPON2      |
| 1.24E-71 | 0.337726095 | 0.272 | 0.036 | 1.93E-67 | MAPRE2     |
| 1.72E-71 | 0.490162997 | 0.398 | 0.088 | 2.69E-67 | ORAI1      |
| 5.15E-71 | 0.43241438  | 0.379 | 0.077 | 8.06E-67 | NXT1       |
| 5.50E-71 | 0.522288497 | 0.682 | 0.229 | 8.60E-67 | GNAI2      |
| 6.58E-71 | 0.253813601 | 0.177 | 0.011 | 1.03E-66 | PTGER2     |
| 1.15E-70 | 0.453060782 | 0.447 | 0.109 | 1.80E-66 | DNAJC1     |
| 1.25E-70 | 0.393010729 | 0.391 | 0.08  | 1.96E-66 | DPP7       |

|          |             |       |       |          |            |
|----------|-------------|-------|-------|----------|------------|
| 1.34E-70 | 0.427601837 | 0.32  | 0.054 | 2.10E-66 | STARD3NL   |
| 3.79E-70 | 0.644666929 | 0.604 | 0.21  | 5.92E-66 | HNRNPH1    |
| 3.95E-70 | 0.512589394 | 0.447 | 0.109 | 6.18E-66 | SLC38A2    |
| 5.06E-70 | 0.349078725 | 0.284 | 0.041 | 7.91E-66 | FAM53C     |
| 1.43E-69 | 0.48987169  | 0.335 | 0.062 | 2.24E-65 | CLDND1     |
| 1.46E-69 | 0.291859717 | 0.209 | 0.019 | 2.29E-65 | BATF       |
| 1.85E-69 | 0.368298512 | 0.299 | 0.047 | 2.89E-65 | BBX        |
| 2.07E-69 | 0.337077611 | 0.214 | 0.02  | 3.23E-65 | HCG18      |
| 2.42E-69 | 0.434069416 | 0.374 | 0.074 | 3.78E-65 | STX11      |
| 4.83E-69 | 0.371040317 | 0.282 | 0.041 | 7.55E-65 | ZNF292     |
| 7.03E-69 | 0.27473562  | 0.206 | 0.018 | 1.10E-64 | SEMA4D     |
| 8.23E-69 | 0.413251127 | 0.337 | 0.063 | 1.29E-64 | ZC3HAV1    |
| 8.97E-69 | 0.46897567  | 0.405 | 0.093 | 1.40E-64 | TPST2      |
| 1.07E-68 | 0.492529353 | 0.449 | 0.116 | 1.68E-64 | RSRC2      |
| 1.16E-68 | 0.505575021 | 0.43  | 0.105 | 1.81E-64 | MBP        |
| 1.22E-68 | 0.685162088 | 0.74  | 0.306 | 1.91E-64 | HSPA5      |
| 1.45E-68 | 0.327105744 | 0.25  | 0.031 | 2.27E-64 | TRAPP3     |
| 2.42E-68 | 0.296102673 | 0.218 | 0.022 | 3.78E-64 | GFOD1      |
| 3.75E-68 | 0.785828947 | 0.862 | 0.485 | 5.86E-64 | DNAJA1     |
| 4.22E-68 | 0.592553873 | 0.641 | 0.236 | 6.60E-64 | MAP1LC3B   |
| 4.36E-68 | 0.472319042 | 0.461 | 0.12  | 6.81E-64 | WDR1       |
| 5.04E-68 | 0.570950928 | 0.495 | 0.139 | 7.88E-64 | DDX3X      |
| 5.27E-68 | 0.333099095 | 0.223 | 0.023 | 8.25E-64 | HAVCR2     |
| 8.66E-68 | 0.327762148 | 0.248 | 0.031 | 1.35E-63 | GLIPR2     |
| 8.67E-68 | 0.514006069 | 0.459 | 0.123 | 1.36E-63 | SLTM       |
| 1.15E-67 | 0.586541719 | 0.595 | 0.205 | 1.80E-63 | PSMB10     |
| 1.32E-67 | 0.32440854  | 0.175 | 0.011 | 2.07E-63 | CRTAM      |
| 1.82E-67 | 0.394255736 | 0.357 | 0.071 | 2.85E-63 | USP15      |
| 1.96E-67 | 0.415710881 | 0.337 | 0.064 | 3.06E-63 | EPC1       |
| 2.51E-67 | 0.310503733 | 0.252 | 0.033 | 3.93E-63 | ANKRD13D   |
| 2.91E-67 | 0.256020298 | 0.201 | 0.018 | 4.55E-63 | ARHGAP15   |
| 3.15E-67 | 0.290750873 | 0.218 | 0.022 | 4.93E-63 | ARMCX3     |
| 3.34E-67 | 0.344513306 | 0.274 | 0.04  | 5.22E-63 | IL10RA     |
| 6.38E-67 | 0.262529093 | 0.184 | 0.014 | 9.98E-63 | FBXO34     |
| 6.38E-67 | 0.85039     | 0.983 | 0.816 | 9.98E-63 | HSP90AA1   |
| 6.95E-67 | 0.5316443   | 0.427 | 0.108 | 1.09E-62 | PNN        |
| 1.44E-66 | 0.703148261 | 0.765 | 0.355 | 2.26E-62 | PSMB9      |
| 1.74E-66 | 0.283832349 | 0.163 | 0.009 | 2.71E-62 | TNFRSF18   |
| 2.11E-66 | 0.528027851 | 0.471 | 0.131 | 3.30E-62 | ICAM3      |
| 4.49E-66 | 0.332936947 | 0.265 | 0.037 | 7.02E-62 | CDC42EP3   |
| 5.04E-66 | 0.557255184 | 0.65  | 0.238 | 7.88E-62 | SRRM2      |
| 9.81E-66 | 0.299595654 | 0.221 | 0.024 | 1.53E-61 | SH3BP1     |
| 1.07E-65 | 0.296201165 | 0.194 | 0.017 | 1.67E-61 | LMNB1      |
| 2.35E-65 | 0.386380748 | 0.303 | 0.052 | 3.68E-61 | POLR2A     |
| 2.50E-65 | 0.404983999 | 0.359 | 0.074 | 3.92E-61 | GRK2       |
| 4.30E-65 | 0.392265597 | 0.347 | 0.069 | 6.73E-61 | CKS2       |
| 4.43E-65 | 0.322134681 | 0.267 | 0.039 | 6.93E-61 | DGKZ       |
| 1.19E-64 | 0.702400928 | 0.799 | 0.39  | 1.86E-60 | YWHAB      |
| 1.20E-64 | 0.275235241 | 0.206 | 0.02  | 1.87E-60 | CBLB       |
| 2.08E-64 | 0.557452829 | 0.573 | 0.194 | 3.25E-60 | SRRM1      |
| 2.50E-64 | 0.694271766 | 0.857 | 0.471 | 3.92E-60 | ARPC1B     |
| 2.66E-64 | 0.672288193 | 0.803 | 0.402 | 4.16E-60 | CCNI       |
| 8.45E-64 | 0.498425909 | 0.43  | 0.112 | 1.32E-59 | PPP1R2     |
| 9.37E-64 | 0.501001001 | 0.493 | 0.149 | 1.47E-59 | RBM4       |
| 9.88E-64 | 0.31966468  | 0.245 | 0.033 | 1.55E-59 | RASSF1     |
| 2.68E-63 | 0.310202731 | 0.255 | 0.036 | 4.20E-59 | PRKCB      |
| 2.77E-63 | 0.326725141 | 0.201 | 0.02  | 4.33E-59 | SMAD7      |
| 3.01E-63 | 0.261768094 | 0.189 | 0.017 | 4.70E-59 | PRKX       |
| 3.40E-63 | 0.518179122 | 1     | 1     | 5.32E-59 | RPL41      |
| 4.64E-63 | 0.42424665  | 0.359 | 0.078 | 7.26E-59 | DDX6       |
| 5.01E-63 | 0.308722896 | 0.206 | 0.022 | 7.84E-59 | AC004687.1 |
| 9.82E-63 | 0.480369583 | 0.408 | 0.104 | 1.53E-58 | BCLAF1     |
| 1.25E-62 | 0.428506551 | 0.362 | 0.08  | 1.96E-58 | RSF1       |
| 1.80E-62 | 0.329290157 | 0.24  | 0.032 | 2.81E-58 | CASP3      |

|          |             |       |       |          |           |
|----------|-------------|-------|-------|----------|-----------|
| 1.88E-62 | 0.464356863 | 0.323 | 0.063 | 2.94E-58 | NFKBID    |
| 2.83E-62 | 0.714809491 | 0.667 | 0.259 | 4.42E-58 | DNAJB1    |
| 3.45E-62 | 0.303275654 | 0.26  | 0.038 | 5.39E-58 | LPIN1     |
| 4.54E-62 | 0.760347845 | 0.954 | 0.801 | 7.11E-58 | IFITM2    |
| 5.52E-62 | 0.420720009 | 0.359 | 0.078 | 8.63E-58 | CSRN1P1   |
| 1.49E-61 | 0.515442883 | 0.466 | 0.136 | 2.33E-57 | FAM133B   |
| 2.15E-61 | 0.371152008 | 0.33  | 0.067 | 3.36E-57 | SFT2D1    |
| 2.62E-61 | 0.404514007 | 0.357 | 0.079 | 4.09E-57 | CNN2      |
| 3.44E-61 | 0.330338631 | 0.274 | 0.044 | 5.38E-57 | RASSF5    |
| 4.09E-61 | 0.383303568 | 0.34  | 0.072 | 6.39E-57 | MECP2     |
| 4.47E-61 | 0.254628672 | 0.163 | 0.011 | 6.99E-57 | TRAF1     |
| 5.12E-61 | 0.468042219 | 0.325 | 0.066 | 8.00E-57 | MAP3K8    |
| 6.39E-61 | 0.416567429 | 0.33  | 0.067 | 1.00E-56 | CHD2      |
| 7.35E-61 | 0.893383325 | 0.563 | 0.202 | 1.15E-56 | FCER1G    |
| 8.05E-61 | 0.353163404 | 0.316 | 0.061 | 1.26E-56 | RNF139    |
| 8.09E-61 | 0.460628678 | 0.481 | 0.142 | 1.27E-56 | DDX46     |
| 1.09E-60 | 0.33872381  | 0.296 | 0.053 | 1.71E-56 | AGTRAP    |
| 1.57E-60 | 0.293745606 | 0.221 | 0.027 | 2.46E-56 | HIPK1     |
| 1.82E-60 | 0.512080255 | 0.483 | 0.151 | 2.84E-56 | ANXA6     |
| 1.82E-60 | 0.294349259 | 0.204 | 0.022 | 2.85E-56 | LAT2      |
| 2.14E-60 | 0.460371764 | 0.43  | 0.118 | 3.35E-56 | BUB3      |
| 2.90E-60 | 0.647004738 | 0.682 | 0.303 | 4.54E-56 | TCF25     |
| 3.14E-60 | 0.3055581   | 0.233 | 0.031 | 4.91E-56 | C1orf21   |
| 3.25E-60 | 0.356029617 | 0.303 | 0.057 | 5.08E-56 | ISG20L2   |
| 3.45E-60 | 0.326616733 | 0.257 | 0.04  | 5.40E-56 | TNFAIP8   |
| 4.78E-60 | 0.412293274 | 0.303 | 0.057 | 7.47E-56 | INTS6     |
| 5.31E-60 | 0.715658481 | 0.93  | 0.722 | 8.30E-56 | HNRNPA2B1 |
| 6.11E-60 | 0.416302232 | 0.4   | 0.1   | 9.56E-56 | ACTN4     |
| 6.86E-60 | 0.512471519 | 0.439 | 0.126 | 1.07E-55 | GABARAPL1 |
| 1.00E-59 | 0.250468049 | 0.172 | 0.014 | 1.57E-55 | NFATC2    |
| 1.22E-59 | 0.302680534 | 0.206 | 0.024 | 1.91E-55 | OASL      |
| 1.62E-59 | 0.322134681 | 0.262 | 0.042 | 2.54E-55 | GNPTAB    |
| 2.16E-59 | 0.631196376 | 0.745 | 0.337 | 3.38E-55 | PDIA3     |
| 2.34E-59 | 0.255562945 | 0.194 | 0.02  | 3.67E-55 | JADE2     |
| 3.46E-59 | 0.25871031  | 0.204 | 0.023 | 5.42E-55 | LNPEP     |
| 3.98E-59 | 0.344513306 | 0.26  | 0.042 | 6.22E-55 | GLS       |
| 5.56E-59 | 0.434713901 | 0.388 | 0.097 | 8.70E-55 | ROCK1     |
| 7.31E-59 | 0.438547054 | 0.388 | 0.097 | 1.14E-54 | BPTF      |
| 8.38E-59 | 0.649138253 | 0.405 | 0.106 | 1.31E-54 | BIRC3     |
| 8.70E-59 | 0.500582668 | 0.561 | 0.199 | 1.36E-54 | VAMP2     |
| 9.67E-59 | 0.653008519 | 1     | 0.905 | 1.51E-54 | MT-CO1    |
| 9.89E-59 | 0.607495243 | 0.709 | 0.323 | 1.55E-54 | CAPZB     |
| 1.13E-58 | 0.350589514 | 0.631 | 0.213 | 1.77E-54 | S100A11   |
| 1.73E-58 | 0.265690717 | 0.187 | 0.019 | 2.71E-54 | CHD3      |
| 2.12E-58 | 0.383939751 | 0.379 | 0.09  | 3.31E-54 | SH3BGRL   |
| 2.26E-58 | 0.257732324 | 0.214 | 0.026 | 3.54E-54 | MFSD10    |
| 3.51E-58 | 0.671177467 | 0.74  | 0.367 | 5.49E-54 | SET       |
| 6.78E-58 | 0.349940188 | 0.301 | 0.057 | 1.06E-53 | USP36     |
| 7.39E-58 | 0.592184295 | 0.646 | 0.268 | 1.16E-53 | DEK       |
| 9.16E-58 | 0.57443833  | 0.374 | 0.09  | 1.43E-53 | NFKB1     |
| 1.31E-57 | 0.383334366 | 0.388 | 0.095 | 2.04E-53 | MIDN      |
| 3.52E-57 | 0.578119468 | 0.631 | 0.256 | 5.50E-53 | FAM49B    |
| 8.17E-57 | 0.312915017 | 0.26  | 0.043 | 1.28E-52 | TNFSF12   |
| 8.83E-57 | 0.35906292  | 0.267 | 0.046 | 1.38E-52 | BRAF      |
| 8.93E-57 | 0.368614712 | 0.362 | 0.086 | 1.40E-52 | DNTTIP2   |
| 1.09E-56 | 0.25074674  | 0.114 | 0.003 | 1.70E-52 | KRT86     |
| 1.36E-56 | 0.584279538 | 0.57  | 0.223 | 2.13E-52 | MRPS6     |
| 1.65E-56 | 0.397494862 | 0.371 | 0.09  | 2.59E-52 | AMD1      |
| 1.71E-56 | 0.271629589 | 0.223 | 0.031 | 2.68E-52 | CCNT1     |
| 2.43E-56 | 0.480459728 | 1     | 0.997 | 3.80E-52 | RPS27A    |
| 2.70E-56 | 0.299156881 | 0.233 | 0.034 | 4.23E-52 | DANCR     |
| 2.87E-56 | 0.723764459 | 0.818 | 0.477 | 4.48E-52 | NCL       |
| 4.02E-56 | 0.28681252  | 0.223 | 0.031 | 6.29E-52 | TES       |
| 4.38E-56 | 0.290230707 | 0.24  | 0.037 | 6.86E-52 | RNF166    |



|          |             |       |       |          |            |
|----------|-------------|-------|-------|----------|------------|
| 4.77E-56 | 0.657709832 | 0.908 | 0.653 | 7.47E-52 | SUB1       |
| 4.78E-56 | 0.279499738 | 0.223 | 0.031 | 7.47E-52 | KIF2A      |
| 7.64E-56 | 0.285004613 | 0.231 | 0.034 | 1.19E-51 | OFD1       |
| 9.15E-56 | 0.364005466 | 0.311 | 0.065 | 1.43E-51 | PTPN2      |
| 9.23E-56 | 0.402109915 | 0.345 | 0.08  | 1.44E-51 | RAB9A      |
| 1.55E-55 | 0.316917962 | 0.284 | 0.054 | 2.42E-51 | NFKBIB     |
| 1.77E-55 | 0.490451833 | 0.515 | 0.173 | 2.77E-51 | CKLF       |
| 1.92E-55 | 0.392110321 | 0.359 | 0.087 | 3.00E-51 | FBNP1      |
| 4.76E-55 | 0.364532997 | 0.286 | 0.056 | 7.44E-51 | DIAPH1     |
| 5.68E-55 | 0.524411258 | 0.578 | 0.217 | 8.88E-51 | ABRACL     |
| 5.73E-55 | 0.495927419 | 0.561 | 0.202 | 8.96E-51 | CAP1       |
| 6.09E-55 | 0.654321618 | 0.932 | 0.742 | 9.52E-51 | HMGB1      |
| 6.57E-55 | 0.618474954 | 0.667 | 0.311 | 1.03E-50 | HNRNPDL    |
| 7.05E-55 | 0.278451876 | 0.231 | 0.034 | 1.10E-50 | PPM1K      |
| 7.54E-55 | 0.57811519  | 0.789 | 0.422 | 1.18E-50 | RBM8A      |
| 7.76E-55 | 0.350674018 | 0.245 | 0.04  | 1.21E-50 | ATM        |
| 7.95E-55 | 0.339798177 | 0.32  | 0.069 | 1.24E-50 | NKTR       |
| 1.12E-54 | 0.263470199 | 0.226 | 0.033 | 1.75E-50 | TMC6       |
| 1.14E-54 | 0.31308639  | 0.267 | 0.048 | 1.78E-50 | ARID5A     |
| 1.27E-54 | 0.388589128 | 0.352 | 0.086 | 1.99E-50 | KPNA2      |
| 1.98E-54 | 0.309614238 | 0.282 | 0.054 | 3.09E-50 | LRP10      |
| 2.21E-54 | 0.522281394 | 0.653 | 0.273 | 3.46E-50 | UBE2B      |
| 3.44E-54 | 0.449476655 | 0.444 | 0.137 | 5.38E-50 | SF3B1      |
| 3.69E-54 | 0.268548212 | 0.175 | 0.018 | 5.76E-50 | TNFSF14    |
| 3.78E-54 | 0.365168276 | 0.342 | 0.082 | 5.92E-50 | SSBP4      |
| 3.86E-54 | 0.361472199 | 0.306 | 0.065 | 6.03E-50 | LYST       |
| 6.39E-54 | 0.343009173 | 0.296 | 0.061 | 9.99E-50 | BDP1       |
| 8.19E-54 | 0.548671857 | 0.675 | 0.301 | 1.28E-49 | PPP1CA     |
| 9.95E-54 | 0.579037756 | 0.665 | 0.303 | 1.56E-49 | BZW1       |
| 1.00E-53 | 0.283253447 | 0.204 | 0.026 | 1.57E-49 | PTTG1      |
| 4.81E-53 | 0.411881251 | 0.459 | 0.14  | 7.52E-49 | ACTR2      |
| 9.85E-53 | 0.661248052 | 0.524 | 0.189 | 1.54E-48 | LGALS1     |
| 1.22E-52 | 0.604436902 | 0.143 | 0.011 | 1.90E-48 | IL7R       |
| 1.34E-52 | 0.267545611 | 0.211 | 0.03  | 2.09E-48 | INPP5D     |
| 1.67E-52 | 0.324054932 | 0.269 | 0.052 | 2.61E-48 | SYNRG      |
| 2.10E-52 | 0.458547006 | 0.454 | 0.147 | 3.29E-48 | HNRNPA0    |
| 2.31E-52 | 0.254107937 | 0.143 | 0.011 | 3.61E-48 | GPR35      |
| 4.43E-52 | 0.446388513 | 0.473 | 0.158 | 6.92E-48 | C9orf78    |
| 4.60E-52 | 0.34253483  | 0.325 | 0.075 | 7.20E-48 | IVNS1ABP   |
| 5.04E-52 | 0.38112489  | 0.371 | 0.099 | 7.88E-48 | CSNK1D     |
| 5.28E-52 | 0.306270718 | 0.248 | 0.042 | 8.25E-48 | ICAM2      |
| 6.15E-52 | 0.296137348 | 0.267 | 0.051 | 9.61E-48 | PHF1       |
| 6.98E-52 | 0.342850387 | 0.257 | 0.048 | 1.09E-47 | TOPORS     |
| 1.28E-51 | 0.410720487 | 0.318 | 0.071 | 1.99E-47 | ACO20916.1 |
| 1.41E-51 | 0.485030113 | 0.379 | 0.106 | 2.21E-47 | ATRX       |
| 1.64E-51 | 0.314594205 | 0.262 | 0.049 | 2.57E-47 | RAB11FIP1  |
| 2.57E-51 | 0.387765634 | 0.316 | 0.074 | 4.02E-47 | PHF20      |
| 2.68E-51 | 0.434521193 | 0.485 | 0.166 | 4.19E-47 | LINC00623  |
| 3.13E-51 | 0.341969434 | 0.316 | 0.072 | 4.90E-47 | CLK1       |
| 3.29E-51 | 0.455705057 | 0.359 | 0.096 | 5.14E-47 | TANK       |
| 4.37E-51 | 0.424335654 | 0.337 | 0.081 | 6.83E-47 | RGS2       |
| 7.25E-51 | 0.300057095 | 0.233 | 0.039 | 1.13E-46 | CMTM3      |
| 7.40E-51 | 0.659856935 | 0.84  | 0.496 | 1.16E-46 | TAGLN2     |
| 7.98E-51 | 0.450579615 | 0.415 | 0.127 | 1.25E-46 | ARPC5L     |
| 8.61E-51 | 0.492735111 | 0.413 | 0.128 | 1.35E-46 | EML4       |
| 9.69E-51 | 0.264730596 | 0.209 | 0.03  | 1.52E-46 | H2AFX      |
| 1.13E-50 | 0.527799207 | 0.687 | 0.322 | 1.77E-46 | TMEM50A    |
| 1.14E-50 | 0.338846321 | 0.272 | 0.054 | 1.78E-46 | ARID1B     |
| 1.20E-50 | 0.346946931 | 0.289 | 0.062 | 1.87E-46 | ADD3       |
| 1.37E-50 | 0.33434195  | 0.252 | 0.047 | 2.15E-46 | BTN3A2     |
| 1.68E-50 | 0.408368906 | 0.408 | 0.121 | 2.63E-46 | RSBN1L     |
| 1.69E-50 | 0.355727426 | 0.383 | 0.106 | 2.65E-46 | CCDC12     |
| 2.26E-50 | 0.517049432 | 0.561 | 0.221 | 3.54E-46 | PTP4A2     |
| 2.78E-50 | 0.383846586 | 0.35  | 0.09  | 4.35E-46 | CHORDC1    |

|          |             |       |       |          |          |
|----------|-------------|-------|-------|----------|----------|
| 3.20E-50 | 0.294433274 | 0.257 | 0.049 | 5.00E-46 | GRK6     |
| 3.79E-50 | 0.574836478 | 0.718 | 0.364 | 5.93E-46 | TPM3     |
| 4.81E-50 | 0.337853064 | 0.231 | 0.039 | 7.53E-46 | PRR7     |
| 4.95E-50 | 0.252249704 | 0.187 | 0.024 | 7.73E-46 | ANKRD28  |
| 6.56E-50 | 0.562684853 | 0.483 | 0.169 | 1.03E-45 | PIM3     |
| 6.65E-50 | 0.293989212 | 0.223 | 0.037 | 1.04E-45 | RSBN1    |
| 7.58E-50 | 0.25750224  | 0.199 | 0.028 | 1.19E-45 | PRDM2    |
| 8.33E-50 | 0.345471603 | 0.306 | 0.069 | 1.30E-45 | RESF1    |
| 9.44E-50 | 0.411609358 | 0.398 | 0.118 | 1.48E-45 | ANP32E   |
| 1.03E-49 | 0.423290254 | 0.374 | 0.106 | 1.60E-45 | KLF3     |
| 1.07E-49 | 0.652392468 | 0.915 | 0.636 | 1.68E-45 | CD81     |
| 1.85E-49 | 0.424669498 | 1     | 0.997 | 2.89E-45 | EIF1     |
| 1.94E-49 | 0.318059412 | 0.277 | 0.058 | 3.03E-45 | TAF7     |
| 2.96E-49 | 0.421985553 | 0.481 | 0.166 | 4.63E-45 | SNRPN    |
| 3.66E-49 | 0.388655052 | 0.345 | 0.09  | 5.72E-45 | RAB29    |
| 4.53E-49 | 0.455660393 | 0.461 | 0.157 | 7.08E-45 | BSG      |
| 7.22E-49 | 0.526006385 | 0.597 | 0.259 | 1.13E-44 | YPEL3    |
| 7.27E-49 | 0.311174164 | 0.291 | 0.064 | 1.14E-44 | UPP1     |
| 7.50E-49 | 0.282883737 | 0.245 | 0.045 | 1.17E-44 | MLLT6    |
| 7.65E-49 | 0.358810488 | 0.328 | 0.082 | 1.20E-44 | PRMT2    |
| 3.26E-48 | 0.272892351 | 0.214 | 0.034 | 5.09E-44 | RABGAP1L |
| 4.28E-48 | 0.377610751 | 0.34  | 0.089 | 6.70E-44 | RBBP6    |
| 4.74E-48 | 0.36717427  | 0.32  | 0.08  | 7.42E-44 | BTG3     |
| 5.61E-48 | 0.573357641 | 0.83  | 0.501 | 8.78E-44 | TRIR     |
| 8.39E-48 | 0.406465614 | 0.325 | 0.083 | 1.31E-43 | GOLGB1   |
| 2.16E-47 | 0.495437637 | 1     | 0.885 | 3.38E-43 | MT-CO2   |
| 2.55E-47 | 0.363139652 | 0.34  | 0.087 | 3.99E-43 | NR4A3    |
| 2.77E-47 | 0.438316032 | 0.442 | 0.148 | 4.33E-43 | MPHOSPH8 |
| 6.19E-47 | 0.274154298 | 0.218 | 0.037 | 9.68E-43 | KDM2A    |
| 6.71E-47 | 0.559847669 | 0.697 | 0.353 | 1.05E-42 | CIRBP    |
| 7.94E-47 | 0.544256248 | 0.697 | 0.353 | 1.24E-42 | DRAP1    |
| 9.40E-47 | 0.397477015 | 0.35  | 0.096 | 1.47E-42 | MBNL1    |
| 1.15E-46 | 0.327211761 | 0.272 | 0.059 | 1.79E-42 | CYTH1    |
| 1.18E-46 | 0.333531508 | 0.316 | 0.077 | 1.85E-42 | TUBA1A   |
| 1.58E-46 | 0.276908092 | 0.228 | 0.041 | 2.47E-42 | USP34    |
| 1.87E-46 | 0.454953161 | 1     | 0.999 | 2.92E-42 | RPL28    |
| 2.19E-46 | 0.468109495 | 0.505 | 0.194 | 3.43E-42 | TAF1D    |
| 2.56E-46 | 0.290500867 | 0.272 | 0.059 | 4.01E-42 | MAP7D1   |
| 2.82E-46 | 0.317815206 | 0.318 | 0.079 | 4.41E-42 | RBMS1    |
| 3.95E-46 | 0.378336502 | 0.362 | 0.104 | 6.18E-42 | CCNDBP1  |
| 3.98E-46 | 0.250572533 | 0.204 | 0.033 | 6.22E-42 | TSEN54   |
| 4.24E-46 | 0.278897108 | 0.231 | 0.042 | 6.63E-42 | ARID5B   |
| 4.71E-46 | 0.521731919 | 0.738 | 0.373 | 7.37E-42 | CALM2    |
| 5.50E-46 | 0.309563895 | 0.299 | 0.071 | 8.61E-42 | TSC22D4  |
| 5.95E-46 | 0.490853848 | 0.51  | 0.194 | 9.31E-42 | DDX17    |
| 6.45E-46 | 0.296842927 | 0.269 | 0.059 | 1.01E-41 | PPP2R2A  |
| 6.64E-46 | 0.480370173 | 0.6   | 0.257 | 1.04E-41 | ARL6IP1  |
| 9.52E-46 | 0.351880885 | 0.335 | 0.09  | 1.49E-41 | ITSN2    |
| 1.37E-45 | 0.277124372 | 0.238 | 0.046 | 2.14E-41 | TFDP2    |
| 1.52E-45 | 0.581597225 | 0.684 | 0.343 | 2.38E-41 | CDC42    |
| 1.87E-45 | 0.291776154 | 0.265 | 0.057 | 2.92E-41 | PPP4R3A  |
| 2.49E-45 | 0.328662206 | 0.5   | 0.169 | 3.89E-41 | HLA-DQB1 |
| 3.06E-45 | 0.363974786 | 0.289 | 0.069 | 4.79E-41 | MACF1    |
| 3.32E-45 | 0.379028052 | 0.405 | 0.128 | 5.20E-41 | KIF5B    |
| 3.95E-45 | 0.366090804 | 0.393 | 0.121 | 6.18E-41 | MXD4     |
| 4.67E-45 | 0.279869749 | 0.233 | 0.044 | 7.30E-41 | TMF1     |
| 5.64E-45 | 0.410530247 | 0.473 | 0.171 | 8.81E-41 | ARPC4    |
| 1.06E-44 | 0.275151242 | 0.221 | 0.04  | 1.66E-40 | KANSL1   |
| 1.19E-44 | 0.427619384 | 0.408 | 0.127 | 1.87E-40 | PPP1R15A |
| 1.34E-44 | 0.408368906 | 0.41  | 0.132 | 2.09E-40 | SCAF11   |
| 1.96E-44 | 0.343457419 | 0.311 | 0.079 | 3.07E-40 | C1orf56  |
| 2.00E-44 | 0.511926592 | 0.694 | 0.343 | 3.13E-40 | JPT1     |
| 2.27E-44 | 0.250788303 | 0.189 | 0.029 | 3.56E-40 | TTC14    |
| 2.59E-44 | 0.250944688 | 0.214 | 0.038 | 4.04E-40 | C1orf52  |

|          |             |       |       |          |            |
|----------|-------------|-------|-------|----------|------------|
| 2.78E-44 | 0.251159972 | 0.204 | 0.034 | 4.34E-40 | CDK13      |
| 2.94E-44 | 0.259681643 | 0.214 | 0.038 | 4.60E-40 | STK10      |
| 3.02E-44 | 0.401162172 | 0.425 | 0.143 | 4.72E-40 | THRAP3     |
| 3.18E-44 | 0.264246335 | 0.206 | 0.035 | 4.98E-40 | AKAP17A    |
| 4.02E-44 | 0.571429717 | 0.617 | 0.272 | 6.29E-40 | ID2        |
| 4.33E-44 | 0.251236575 | 0.216 | 0.039 | 6.77E-40 | NUTM2B-AS1 |
| 4.83E-44 | 0.423877    | 0.396 | 0.129 | 7.55E-40 | PDCL3      |
| 6.19E-44 | 0.412359766 | 0.524 | 0.204 | 9.68E-40 | TSPO       |
| 7.44E-44 | 0.536834917 | 0.612 | 0.258 | 1.16E-39 | DUSP1      |
| 7.95E-44 | 0.346697516 | 0.328 | 0.09  | 1.24E-39 | SIRT2      |
| 8.19E-44 | 0.360274617 | 0.345 | 0.098 | 1.28E-39 | SRPK2      |
| 8.53E-44 | 0.510830939 | 0.653 | 0.326 | 1.33E-39 | SNRPB      |
| 1.40E-43 | 0.281256988 | 0.255 | 0.055 | 2.18E-39 | SPTAN1     |
| 2.07E-43 | 0.327562962 | 0.25  | 0.053 | 3.24E-39 | IRF8       |
| 2.14E-43 | 0.275102375 | 0.243 | 0.05  | 3.35E-39 | TUT4       |
| 2.90E-43 | 0.520569897 | 0.774 | 0.437 | 4.54E-39 | HNRNPK     |
| 5.28E-43 | 0.514105625 | 0.951 | 0.835 | 8.26E-39 | RPL36AL    |
| 5.29E-43 | 0.366805954 | 0.391 | 0.126 | 8.28E-39 | HNRNPL     |
| 5.49E-43 | 0.463405791 | 0.51  | 0.206 | 8.59E-39 | EIF4A2     |
| 7.57E-43 | 0.270116124 | 0.248 | 0.053 | 1.18E-38 | TAP2       |
| 8.51E-43 | 0.270865382 | 0.26  | 0.058 | 1.33E-38 | ASH1L      |
| 9.15E-43 | 0.367455712 | 0.328 | 0.091 | 1.43E-38 | CHD4       |
| 1.21E-42 | 0.303178472 | 0.282 | 0.068 | 1.89E-38 | MIER1      |
| 1.61E-42 | 0.27502336  | 0.279 | 0.067 | 2.52E-38 | TMEM109    |
| 1.85E-42 | 0.296756915 | 0.286 | 0.07  | 2.89E-38 | CITED2     |
| 2.01E-42 | 0.262878122 | 0.233 | 0.047 | 3.15E-38 | CASP1      |
| 2.19E-42 | 0.328880392 | 0.32  | 0.088 | 3.42E-38 | MAPK1      |
| 3.48E-42 | 0.393694195 | 0.357 | 0.108 | 5.44E-38 | AKAP9      |
| 5.52E-42 | 0.271116176 | 0.228 | 0.046 | 8.63E-38 | TENT4B     |
| 6.39E-42 | 0.563126111 | 0.91  | 0.731 | 9.99E-38 | PSME1      |
| 9.31E-42 | 0.411355411 | 0.493 | 0.193 | 1.46E-37 | RALY       |
| 1.01E-41 | 0.329149889 | 0.325 | 0.091 | 1.58E-37 | YTHDC1     |
| 1.25E-41 | 0.552879947 | 0.74  | 0.422 | 1.95E-37 | HNRNPA3    |
| 1.65E-41 | 0.303602954 | 0.274 | 0.067 | 2.58E-37 | G6PD       |
| 1.73E-41 | 0.272367928 | 0.231 | 0.048 | 2.71E-37 | CSNK1G2    |
| 1.90E-41 | 0.549701893 | 0.672 | 0.344 | 2.96E-37 | CYCS       |
| 1.97E-41 | 0.481952669 | 0.845 | 0.527 | 3.08E-37 | GNAS       |
| 2.27E-41 | 0.301304632 | 0.291 | 0.075 | 3.54E-37 | TRA2A      |
| 2.53E-41 | 0.300662678 | 0.25  | 0.055 | 3.95E-37 | RANBP2     |
| 3.16E-41 | 0.310538689 | 0.282 | 0.071 | 4.95E-37 | PRKAR2A    |
| 3.37E-41 | 0.315095865 | 0.274 | 0.068 | 5.27E-37 | GYG1       |
| 3.66E-41 | 0.404278729 | 0.393 | 0.133 | 5.72E-37 | TAPBP      |
| 4.05E-41 | 0.256583594 | 0.25  | 0.055 | 6.33E-37 | VSIR       |
| 4.07E-41 | 0.25059536  | 0.214 | 0.041 | 6.37E-37 | IFI27L2    |
| 4.71E-41 | 0.468571557 | 0.626 | 0.288 | 7.36E-37 | HNRNPU     |
| 7.28E-41 | 0.487127334 | 0.774 | 0.402 | 1.14E-36 | HSP90B1    |
| 1.21E-40 | 0.308833232 | 0.299 | 0.079 | 1.89E-36 | CREBRF     |
| 1.62E-40 | 0.331005957 | 0.301 | 0.081 | 2.54E-36 | TNRC6B     |
| 1.76E-40 | 0.274307983 | 0.257 | 0.06  | 2.75E-36 | PCM1       |
| 1.77E-40 | 0.342171669 | 0.255 | 0.06  | 2.76E-36 | OTULIN     |
| 2.19E-40 | 0.316039716 | 0.328 | 0.093 | 3.42E-36 | RNF149     |
| 2.74E-40 | 0.348309467 | 0.274 | 0.068 | 4.28E-36 | RASGEF1B   |
| 3.33E-40 | 0.37966441  | 0.381 | 0.124 | 5.21E-36 | MYH9       |
| 3.61E-40 | 0.281647719 | 0.209 | 0.04  | 5.65E-36 | SKIL       |
| 3.91E-40 | 0.250462021 | 0.223 | 0.045 | 6.11E-36 | PREX1      |
| 4.44E-40 | 0.39810057  | 0.417 | 0.149 | 6.94E-36 | NR3C1      |
| 6.08E-40 | 0.336919422 | 0.333 | 0.098 | 9.51E-36 | IGFLR1     |
| 6.28E-40 | 0.254594683 | 0.238 | 0.052 | 9.82E-36 | RBL2       |
| 6.55E-40 | 0.323976718 | 0.354 | 0.11  | 1.02E-35 | COMMD7     |
| 7.44E-40 | 0.254314206 | 0.228 | 0.048 | 1.16E-35 | IGF2R      |
| 9.95E-40 | 0.311724079 | 1     | 0.874 | 1.56E-35 | MT-ATP6    |
| 1.03E-39 | 0.326274322 | 0.303 | 0.084 | 1.62E-35 | NAA50      |
| 1.05E-39 | 0.349642495 | 0.371 | 0.117 | 1.65E-35 | BHLHE40    |
| 1.09E-39 | 0.342835745 | 0.33  | 0.098 | 1.70E-35 | MOB4       |

|          |             |       |       |          |          |
|----------|-------------|-------|-------|----------|----------|
| 1.10E-39 | 0.297239011 | 0.265 | 0.065 | 1.73E-35 | MTFFP1   |
| 1.32E-39 | 0.318334955 | 0.345 | 0.103 | 2.07E-35 | CCNL1    |
| 1.74E-39 | 0.28490692  | 0.255 | 0.061 | 2.72E-35 | PDCD7    |
| 2.26E-39 | 0.257190445 | 0.238 | 0.052 | 3.54E-35 | VEGFB    |
| 2.40E-39 | 0.310949372 | 0.286 | 0.075 | 3.76E-35 | MARCKSL1 |
| 3.03E-39 | 0.303972012 | 0.279 | 0.072 | 4.74E-35 | JOSD1    |
| 3.32E-39 | 0.323079006 | 0.26  | 0.064 | 5.20E-35 | ANKRD37  |
| 4.34E-39 | 0.364940742 | 0.447 | 0.161 | 6.79E-35 | WASF2    |
| 4.45E-39 | 0.327521775 | 0.33  | 0.099 | 6.95E-35 | SPCS3    |
| 5.48E-39 | 0.336940796 | 0.342 | 0.105 | 8.57E-35 | ZBTB7A   |
| 5.70E-39 | 0.267898907 | 0.25  | 0.059 | 8.92E-35 | MAPRE1   |
| 7.30E-39 | 0.430558766 | 0.583 | 0.267 | 1.14E-34 | CCDC85B  |
| 7.44E-39 | 0.435134333 | 0.551 | 0.247 | 1.16E-34 | UBE2I    |
| 9.91E-39 | 0.417888823 | 0.449 | 0.174 | 1.55E-34 | OPTN     |
| 1.02E-38 | 1.472499243 | 0.15  | 0.021 | 1.59E-34 | PTGDS    |
| 1.10E-38 | 0.353725539 | 0.352 | 0.112 | 1.72E-34 | NUCB2    |
| 1.13E-38 | 0.253967965 | 0.218 | 0.045 | 1.76E-34 | RGS19    |
| 1.21E-38 | 0.27765683  | 0.272 | 0.069 | 1.89E-34 | ZC3H13   |
| 1.79E-38 | 0.297533332 | 0.265 | 0.066 | 2.80E-34 | ZNF644   |
| 1.79E-38 | 0.361584517 | 0.408 | 0.144 | 2.80E-34 | SEPTIN9  |
| 3.94E-38 | 0.329235945 | 0.277 | 0.074 | 6.16E-34 | SMARCA5  |
| 4.05E-38 | 0.852845346 | 0.76  | 0.464 | 6.33E-34 | NFKBIA   |
| 4.82E-38 | 0.326747817 | 0.359 | 0.116 | 7.54E-34 | BRD4     |
| 5.71E-38 | 0.253317181 | 0.226 | 0.049 | 8.93E-34 | VPS13C   |
| 5.86E-38 | 0.266434648 | 0.257 | 0.063 | 9.16E-34 | SMC3     |
| 1.06E-37 | 0.31605206  | 0.306 | 0.088 | 1.66E-33 | PTPN12   |
| 1.06E-37 | 0.335237729 | 0.998 | 0.888 | 1.66E-33 | MT-CO3   |
| 1.10E-37 | 0.330342553 | 0.408 | 0.139 | 1.73E-33 | IQGAP2   |
| 1.11E-37 | 0.334148641 | 0.352 | 0.114 | 1.74E-33 | ZNF207   |
| 1.17E-37 | 0.365954205 | 0.371 | 0.127 | 1.83E-33 | FAM89B   |
| 1.36E-37 | 0.344627954 | 0.311 | 0.093 | 2.12E-33 | HNRNPUL1 |
| 1.60E-37 | 0.38378655  | 0.473 | 0.191 | 2.51E-33 | TOP1     |
| 1.73E-37 | 0.344182059 | 0.553 | 0.234 | 2.70E-33 | KLF6     |
| 2.59E-37 | 0.421602774 | 0.444 | 0.178 | 4.04E-33 | SRSF5    |
| 3.74E-37 | 0.27698421  | 0.262 | 0.067 | 5.85E-33 | KLF13    |
| 3.96E-37 | 0.309345826 | 0.306 | 0.089 | 6.19E-33 | TAOK3    |
| 4.34E-37 | 0.355650604 | 0.262 | 0.068 | 6.79E-33 | ARL5B    |
| 4.36E-37 | 0.320729886 | 0.345 | 0.112 | 6.82E-33 | RNPEPL1  |
| 6.48E-37 | 0.278400324 | 0.248 | 0.06  | 1.01E-32 | GBP4     |
| 1.35E-36 | 0.486874186 | 0.643 | 0.349 | 2.12E-32 | CIB1     |
| 1.70E-36 | 0.46682601  | 0.621 | 0.317 | 2.66E-32 | H2AFV    |
| 1.71E-36 | 0.295985489 | 0.289 | 0.082 | 2.67E-32 | IRF2     |
| 1.97E-36 | 0.322715306 | 0.333 | 0.105 | 3.08E-32 | TNFRSF14 |
| 2.27E-36 | 0.334440341 | 0.379 | 0.133 | 3.55E-32 | WTAP     |
| 4.02E-36 | 0.334473634 | 0.311 | 0.09  | 6.29E-32 | BCL2A1   |
| 4.17E-36 | 0.331419291 | 0.393 | 0.141 | 6.52E-32 | LRPAP1   |
| 6.22E-36 | 0.310758109 | 0.265 | 0.07  | 9.73E-32 | NFKB2    |
| 6.72E-36 | 0.464361538 | 0.818 | 0.51  | 1.05E-31 | SSR2     |
| 7.12E-36 | 0.31871958  | 0.318 | 0.098 | 1.11E-31 | CNOT2    |
| 7.45E-36 | 0.327413701 | 0.374 | 0.13  | 1.17E-31 | HNRNPR   |
| 8.14E-36 | 0.265588602 | 0.211 | 0.046 | 1.27E-31 | HERPUD2  |
| 8.72E-36 | 0.295638271 | 0.973 | 0.772 | 1.36E-31 | MT-ND3   |
| 8.89E-36 | 0.395992769 | 0.403 | 0.151 | 1.39E-31 | TPR      |
| 1.05E-35 | 0.276238554 | 0.255 | 0.065 | 1.64E-31 | PHIP     |
| 1.28E-35 | 0.282188897 | 0.998 | 0.84  | 2.01E-31 | MT-ND4   |
| 2.24E-35 | 0.27259538  | 0.231 | 0.055 | 3.50E-31 | DNMT1    |
| 4.48E-35 | 0.435434941 | 0.631 | 0.297 | 7.01E-31 | ZFP36L1  |
| 4.58E-35 | 0.370637495 | 0.4   | 0.151 | 7.16E-31 | HP1BP3   |
| 8.26E-35 | 0.477779701 | 0.723 | 0.431 | 1.29E-30 | UBE2D3   |
| 9.49E-35 | 0.274713854 | 0.291 | 0.086 | 1.48E-30 | MAPKAPK2 |
| 1.05E-34 | 0.284089975 | 0.24  | 0.06  | 1.64E-30 | AKIRIN1  |
| 1.11E-34 | 0.391445602 | 0.473 | 0.202 | 1.74E-30 | SF3B2    |
| 1.46E-34 | 0.263703221 | 0.291 | 0.084 | 2.29E-30 | DDX3Y    |
| 1.78E-34 | 0.32398763  | 0.379 | 0.137 | 2.78E-30 | PRMT1    |

|          |             |       |       |          |         |
|----------|-------------|-------|-------|----------|---------|
| 2.17E-34 | 0.282498206 | 0.328 | 0.105 | 3.40E-30 | WAC     |
| 2.19E-34 | 0.393252478 | 0.932 | 0.682 | 3.43E-30 | ITM2B   |
| 2.41E-34 | 0.315891292 | 0.294 | 0.088 | 3.77E-30 | WNK1    |
| 2.55E-34 | 0.382052205 | 0.371 | 0.134 | 4.00E-30 | GOLGA4  |
| 2.61E-34 | 0.445171558 | 0.602 | 0.312 | 4.08E-30 | MORF4L1 |
| 2.84E-34 | 0.408368906 | 0.461 | 0.193 | 4.44E-30 | PAK2    |
| 3.24E-34 | 0.423505785 | 0.493 | 0.22  | 5.07E-30 | CDK2AP2 |
| 4.85E-34 | 0.26689648  | 0.226 | 0.054 | 7.58E-30 | TRIM22  |
| 5.38E-34 | 0.372845824 | 0.522 | 0.236 | 8.41E-30 | TBCB    |
| 6.09E-34 | 0.306477644 | 0.299 | 0.092 | 9.52E-30 | KRAS    |
| 7.91E-34 | 0.308120966 | 0.296 | 0.09  | 1.24E-29 | RAB21   |
| 9.16E-34 | 0.276749938 | 0.245 | 0.065 | 1.43E-29 | PBDC1   |
| 1.05E-33 | 0.281244528 | 0.311 | 0.098 | 1.64E-29 | NRBF2   |
| 1.20E-33 | 0.321138588 | 0.325 | 0.106 | 1.87E-29 | TRA2B   |
| 1.36E-33 | 0.370731248 | 0.451 | 0.185 | 2.12E-29 | ISG15   |
| 1.48E-33 | 0.381888458 | 0.383 | 0.145 | 2.31E-29 | CYTOR   |
| 1.79E-33 | 0.389255762 | 1     | 0.986 | 2.80E-29 | RPS21   |
| 2.25E-33 | 0.438485249 | 0.396 | 0.158 | 3.51E-29 | IFNGR1  |
| 2.30E-33 | 0.311556673 | 0.398 | 0.149 | 3.60E-29 | SH3GLB1 |
| 2.43E-33 | 0.42501418  | 0.619 | 0.326 | 3.80E-29 | UBXN1   |
| 2.91E-33 | 0.385124856 | 0.371 | 0.139 | 4.55E-29 | BCAS2   |
| 2.92E-33 | 0.362297971 | 0.42  | 0.167 | 4.57E-29 | YY1     |
| 5.38E-33 | 0.322704313 | 0.369 | 0.135 | 8.41E-29 | AIP     |
| 5.86E-33 | 0.416285935 | 0.609 | 0.307 | 9.17E-29 | ZFAS1   |
| 6.55E-33 | 0.424084116 | 0.939 | 0.823 | 1.02E-28 | TMA7    |
| 7.54E-33 | 0.306239712 | 0.308 | 0.098 | 1.18E-28 | YME1L1  |
| 8.05E-33 | 0.272491216 | 0.325 | 0.106 | 1.26E-28 | GBP2    |
| 9.32E-33 | 0.373614089 | 0.427 | 0.177 | 1.46E-28 | ISCA1   |
| 1.21E-32 | 0.259834612 | 0.248 | 0.067 | 1.89E-28 | ERICH1  |
| 2.15E-32 | 0.278907972 | 0.303 | 0.097 | 3.37E-28 | BIN1    |
| 3.77E-32 | 0.407981136 | 0.544 | 0.272 | 5.90E-28 | RABAC1  |
| 4.39E-32 | 0.435054014 | 0.527 | 0.255 | 6.87E-28 | HNRNPAB |
| 5.31E-32 | 0.428247371 | 0.74  | 0.425 | 8.30E-28 | PCBP1   |
| 6.85E-32 | 0.273065171 | 0.255 | 0.072 | 1.07E-27 | CTBP1   |
| 7.81E-32 | 0.304898712 | 0.347 | 0.124 | 1.22E-27 | PKN1    |
| 8.76E-32 | 0.386207256 | 0.398 | 0.161 | 1.37E-27 | ABCF1   |
| 9.88E-32 | 0.3108524   | 0.299 | 0.096 | 1.54E-27 | B4GALT1 |
| 1.04E-31 | 0.308996534 | 0.354 | 0.128 | 1.63E-27 | AKIRIN2 |
| 1.07E-31 | 0.418861279 | 0.638 | 0.347 | 1.67E-27 | HNRNPF  |
| 1.10E-31 | 0.358120716 | 0.403 | 0.162 | 1.72E-27 | CASP4   |
| 1.43E-31 | 0.344372237 | 0.459 | 0.198 | 2.24E-27 | SNX6    |
| 1.56E-31 | 0.329871557 | 0.318 | 0.109 | 2.43E-27 | LMO4    |
| 2.98E-31 | 0.46627009  | 0.308 | 0.103 | 4.66E-27 | STMN1   |
| 3.11E-31 | 0.33455419  | 0.405 | 0.164 | 4.87E-27 | UBE2N   |
| 3.12E-31 | 0.263369589 | 0.262 | 0.076 | 4.88E-27 | MYO1F   |
| 3.82E-31 | 0.409084173 | 0.612 | 0.319 | 5.98E-27 | CAST    |
| 4.81E-31 | 0.267082502 | 0.279 | 0.085 | 7.52E-27 | PTPN6   |
| 6.07E-31 | 0.281856061 | 0.318 | 0.108 | 9.49E-27 | DDX39A  |
| 7.78E-31 | 0.340767395 | 0.318 | 0.111 | 1.22E-26 | PPP1R10 |
| 8.27E-31 | 0.425893275 | 0.546 | 0.27  | 1.29E-26 | HNRNPC  |
| 8.29E-31 | 0.322078023 | 0.398 | 0.156 | 1.30E-26 | STAT3   |
| 9.54E-31 | 0.529405648 | 0.553 | 0.253 | 1.49E-26 | GADD45B |
| 9.82E-31 | 0.546314702 | 0.473 | 0.232 | 1.54E-26 | CMC1    |
| 1.03E-30 | 0.361482518 | 0.447 | 0.193 | 1.60E-26 | DAZAP2  |
| 1.27E-30 | 0.342453054 | 0.427 | 0.181 | 1.98E-26 | SYAP1   |
| 1.56E-30 | 0.314943709 | 0.294 | 0.096 | 2.45E-26 | NASP    |
| 1.87E-30 | 0.298856919 | 0.291 | 0.095 | 2.93E-26 | CHMP4A  |
| 1.90E-30 | 0.278858173 | 0.248 | 0.071 | 2.97E-26 | ARL4A   |
| 1.91E-30 | 0.318802641 | 0.451 | 0.194 | 2.99E-26 | CTDNBP1 |
| 2.07E-30 | 0.278601031 | 0.308 | 0.103 | 3.23E-26 | IRF9    |
| 2.87E-30 | 0.253628097 | 0.267 | 0.081 | 4.49E-26 | PDLIM2  |
| 3.47E-30 | 0.371288253 | 0.699 | 0.398 | 5.43E-26 | UBE2D2  |
| 3.70E-30 | 0.339919119 | 0.427 | 0.182 | 5.78E-26 | HNRNPM  |
| 4.23E-30 | 0.282137431 | 0.262 | 0.08  | 6.62E-26 | PNPLA8  |

|          |             |       |       |          |           |
|----------|-------------|-------|-------|----------|-----------|
| 5.10E-30 | 0.324903527 | 0.335 | 0.122 | 7.97E-26 | PAFAH1B1  |
| 5.42E-30 | 0.259653301 | 0.255 | 0.075 | 8.48E-26 | COQ10B    |
| 5.49E-30 | 0.392667311 | 0.697 | 0.394 | 8.58E-26 | ARF1      |
| 5.84E-30 | 0.278927082 | 0.33  | 0.117 | 9.14E-26 | MOB1A     |
| 6.07E-30 | 0.391758177 | 0.655 | 0.355 | 9.49E-26 | TRAPPC1   |
| 6.66E-30 | 0.367841099 | 0.515 | 0.247 | 1.04E-25 | MAZ       |
| 7.53E-30 | 0.251683969 | 0.214 | 0.055 | 1.18E-25 | POLR2J3   |
| 1.44E-29 | 0.25441094  | 0.245 | 0.072 | 2.25E-25 | THOC2     |
| 1.44E-29 | 0.386468775 | 0.461 | 0.21  | 2.26E-25 | EIF4G2    |
| 1.87E-29 | 0.271103431 | 0.291 | 0.097 | 2.93E-25 | MED10     |
| 3.41E-29 | 0.274414449 | 0.272 | 0.085 | 5.33E-25 | BCL3      |
| 3.49E-29 | 0.349614278 | 0.459 | 0.207 | 5.46E-25 | FKBP11    |
| 4.51E-29 | 0.404717281 | 0.728 | 0.425 | 7.05E-25 | SLC25A6   |
| 5.02E-29 | 0.3753081   | 0.553 | 0.278 | 7.85E-25 | DHRS7     |
| 5.26E-29 | 0.269709283 | 0.333 | 0.121 | 8.23E-25 | TWF2      |
| 5.43E-29 | 0.354704113 | 0.369 | 0.147 | 8.49E-25 | PPP1CB    |
| 5.55E-29 | 0.256632509 | 0.277 | 0.089 | 8.67E-25 | TMEM9B    |
| 5.73E-29 | 0.272781312 | 0.272 | 0.087 | 8.95E-25 | NAP1L4    |
| 6.90E-29 | 0.315993959 | 0.381 | 0.151 | 1.08E-24 | CD164     |
| 7.45E-29 | 0.317146421 | 1     | 0.994 | 1.16E-24 | RPL6      |
| 9.38E-29 | 0.285059263 | 0.359 | 0.138 | 1.47E-24 | PPP2CA    |
| 1.54E-28 | 0.335956829 | 0.998 | 0.98  | 2.41E-24 | ATP5F1E   |
| 1.54E-28 | 0.283095671 | 0.299 | 0.103 | 2.41E-24 | HDAC1     |
| 2.33E-28 | 0.276437433 | 0.32  | 0.116 | 3.64E-24 | LYSMD2    |
| 2.51E-28 | 0.358875632 | 0.434 | 0.195 | 3.92E-24 | RAP1A     |
| 2.64E-28 | 0.313543029 | 0.415 | 0.177 | 4.13E-24 | MTPN      |
| 3.54E-28 | 0.277908659 | 0.286 | 0.096 | 5.53E-24 | TGIF1     |
| 4.80E-28 | 0.326574814 | 0.481 | 0.224 | 7.51E-24 | TAX1BP1   |
| 4.82E-28 | 0.375526891 | 0.556 | 0.286 | 7.53E-24 | BAX       |
| 5.07E-28 | 0.299068153 | 0.35  | 0.136 | 7.93E-24 | RNPS1     |
| 8.86E-28 | 0.267647644 | 0.33  | 0.123 | 1.39E-23 | PURA      |
| 1.25E-27 | 0.328378807 | 0.454 | 0.21  | 1.96E-23 | EMD       |
| 2.96E-27 | 0.303374532 | 0.393 | 0.165 | 4.63E-23 | SIAH2     |
| 3.59E-27 | 0.263624133 | 0.26  | 0.084 | 5.62E-23 | STAG2     |
| 3.76E-27 | 0.263278887 | 0.328 | 0.122 | 5.88E-23 | CAPZA1    |
| 4.23E-27 | 0.411802144 | 0.425 | 0.184 | 6.62E-23 | CCL3      |
| 5.12E-27 | 0.298957689 | 0.362 | 0.147 | 8.01E-23 | ORMDL1    |
| 5.57E-27 | 0.276330592 | 0.279 | 0.096 | 8.71E-23 | MAPK11P1L |
| 6.10E-27 | 0.338350976 | 0.573 | 0.301 | 9.55E-23 | COPE      |
| 6.20E-27 | 0.360598544 | 0.5   | 0.251 | 9.69E-23 | SLC9A3R1  |
| 7.91E-27 | 0.380918927 | 0.658 | 0.372 | 1.24E-22 | CALR      |
| 1.17E-26 | 0.287663232 | 0.357 | 0.145 | 1.82E-22 | IK        |
| 1.77E-26 | 0.321979099 | 0.141 | 0.027 | 2.76E-22 | TNF       |
| 2.00E-26 | 0.282545332 | 0.32  | 0.12  | 3.12E-22 | PNRC2     |
| 3.03E-26 | 0.347642675 | 0.522 | 0.248 | 4.73E-22 | JUN       |
| 3.44E-26 | 0.251432428 | 0.272 | 0.093 | 5.38E-22 | SAR1A     |
| 4.19E-26 | 0.290833798 | 0.333 | 0.131 | 6.55E-22 | SRSF4     |
| 5.11E-26 | 0.329572559 | 1     | 0.996 | 7.99E-22 | RPL18A    |
| 6.96E-26 | 0.277322468 | 0.323 | 0.125 | 1.09E-21 | SNW1      |
| 7.23E-26 | 0.312221589 | 1     | 1     | 1.13E-21 | RPS27     |
| 7.52E-26 | 0.423672191 | 0.985 | 0.903 | 1.18E-21 | HSPA8     |
| 7.88E-26 | 0.417444803 | 0.825 | 0.612 | 1.23E-21 | HNRNPA1   |
| 9.95E-26 | 0.282963046 | 0.328 | 0.128 | 1.56E-21 | PHF20L1   |
| 1.06E-25 | 0.356583702 | 0.451 | 0.214 | 1.66E-21 | ITGB1     |
| 1.06E-25 | 0.310614896 | 0.468 | 0.226 | 1.66E-21 | HNRNPD    |
| 1.13E-25 | 0.384371913 | 0.556 | 0.294 | 1.77E-21 | HERPUD1   |
| 1.42E-25 | 0.360318766 | 0.563 | 0.307 | 2.22E-21 | RAB5IF    |
| 3.06E-25 | 0.332781879 | 0.648 | 0.368 | 4.78E-21 | VAMP8     |
| 3.38E-25 | 0.385033834 | 0.24  | 0.078 | 5.28E-21 | TWISTNB   |
| 6.29E-25 | 0.34482025  | 0.277 | 0.099 | 9.83E-21 | NFKBIZ    |
| 8.80E-25 | 0.302681435 | 0.274 | 0.099 | 1.38E-20 | NFIL3     |
| 9.06E-25 | 0.355887133 | 0.507 | 0.265 | 1.42E-20 | CAPNS1    |
| 1.23E-24 | 0.250700772 | 0.284 | 0.104 | 1.92E-20 | HNRNPH3   |
| 1.25E-24 | 0.283701433 | 0.345 | 0.143 | 1.95E-20 | SNRNP70   |

|          |             |       |       |          |          |
|----------|-------------|-------|-------|----------|----------|
| 1.47E-24 | 0.331783312 | 0.505 | 0.259 | 2.29E-20 | ANXA11   |
| 2.05E-24 | 0.387188361 | 0.675 | 0.409 | 3.20E-20 | PSMB8    |
| 2.56E-24 | 0.379003612 | 0.602 | 0.346 | 4.00E-20 | EIF5     |
| 2.76E-24 | 0.315641621 | 0.539 | 0.287 | 4.31E-20 | PAIP2    |
| 2.79E-24 | 0.254446955 | 0.294 | 0.11  | 4.36E-20 | TMOD3    |
| 3.71E-24 | 0.263196698 | 0.369 | 0.157 | 5.80E-20 | STOM     |
| 3.78E-24 | 0.325193423 | 0.483 | 0.244 | 5.92E-20 | UBE2M    |
| 4.14E-24 | 0.279331805 | 0.454 | 0.218 | 6.48E-20 | AP2M1    |
| 4.61E-24 | 0.291080963 | 0.335 | 0.138 | 7.21E-20 | MKNK2    |
| 4.68E-24 | 0.291986041 | 0.284 | 0.104 | 7.31E-20 | CHMP1B   |
| 4.73E-24 | 0.250757808 | 0.335 | 0.135 | 7.40E-20 | PCMT1    |
| 5.01E-24 | 0.259957799 | 0.299 | 0.114 | 7.83E-20 | RAD21    |
| 1.04E-23 | 0.250714996 | 0.226 | 0.073 | 1.63E-19 | LBR      |
| 1.07E-23 | 0.251869045 | 0.359 | 0.152 | 1.67E-19 | PPP4R2   |
| 1.27E-23 | 0.342659436 | 0.607 | 0.344 | 1.99E-19 | PGK1     |
| 1.67E-23 | 0.262605655 | 0.311 | 0.123 | 2.60E-19 | ATP1A1   |
| 1.83E-23 | 0.307125073 | 0.381 | 0.174 | 2.86E-19 | UBE2L6   |
| 2.39E-23 | 0.251216772 | 0.245 | 0.085 | 3.74E-19 | TMEM259  |
| 2.60E-23 | 0.258488984 | 0.422 | 0.196 | 4.06E-19 | CMC2     |
| 4.47E-23 | 0.29806974  | 0.466 | 0.235 | 6.99E-19 | PAPOLA   |
| 5.07E-23 | 0.254508621 | 0.381 | 0.17  | 7.92E-19 | SPSB3    |
| 5.33E-23 | 0.265053211 | 0.294 | 0.114 | 8.34E-19 | PLP2     |
| 5.45E-23 | 0.263558194 | 0.282 | 0.108 | 8.52E-19 | TERF1    |
| 5.74E-23 | 0.274592428 | 0.376 | 0.168 | 8.98E-19 | SRSF10   |
| 6.05E-23 | 0.298647422 | 0.449 | 0.224 | 9.46E-19 | EIF1B    |
| 6.29E-23 | 0.352276507 | 0.803 | 0.578 | 9.84E-19 | ATP6V0C  |
| 6.56E-23 | 0.302060003 | 0.447 | 0.222 | 1.03E-18 | STRAP    |
| 9.67E-23 | 0.350610612 | 0.4   | 0.195 | 1.51E-18 | PPIG     |
| 1.10E-22 | 0.252949038 | 0.352 | 0.151 | 1.72E-18 | DGUOK    |
| 1.12E-22 | 0.325506052 | 0.471 | 0.247 | 1.74E-18 | CDC37    |
| 1.67E-22 | 0.427470797 | 0.752 | 0.537 | 2.61E-18 | SDCBP    |
| 1.88E-22 | 0.349170004 | 0.988 | 0.951 | 2.94E-18 | RPSA     |
| 2.78E-22 | 0.394141258 | 0.981 | 0.945 | 4.35E-18 | RPS9     |
| 3.37E-22 | 0.338493633 | 0.621 | 0.376 | 5.27E-18 | SRSF9    |
| 4.11E-22 | 0.332126851 | 0.42  | 0.208 | 6.43E-18 | PRPF40A  |
| 1.04E-21 | 0.275860041 | 0.328 | 0.136 | 1.62E-17 | AHNAK    |
| 1.95E-21 | 0.338895865 | 0.687 | 0.444 | 3.04E-17 | HMGN1    |
| 2.02E-21 | 0.296760832 | 0.549 | 0.302 | 3.16E-17 | SEC62    |
| 2.41E-21 | 0.313692206 | 0.483 | 0.258 | 3.76E-17 | SYF2     |
| 2.61E-21 | 0.287696636 | 0.26  | 0.097 | 4.07E-17 | IER5     |
| 6.46E-21 | 0.317108941 | 0.449 | 0.23  | 1.01E-16 | DDX21    |
| 7.54E-21 | 0.271268989 | 0.456 | 0.234 | 1.18E-16 | SSB      |
| 1.56E-20 | 0.254316737 | 0.364 | 0.169 | 2.44E-16 | TMED9    |
| 2.06E-20 | 0.313266717 | 0.949 | 0.85  | 3.23E-16 | PFDN5    |
| 2.19E-20 | 0.288911535 | 0.362 | 0.173 | 3.43E-16 | ZNRD1    |
| 2.35E-20 | 0.309702587 | 0.42  | 0.213 | 3.68E-16 | EIF3A    |
| 2.46E-20 | 0.275891199 | 1     | 0.996 | 3.84E-16 | RPL18    |
| 2.95E-20 | 0.356482164 | 0.558 | 0.336 | 4.62E-16 | XRCC5    |
| 3.24E-20 | 0.266031524 | 0.42  | 0.21  | 5.06E-16 | MAGOH    |
| 4.35E-20 | 0.313305642 | 0.563 | 0.323 | 6.80E-16 | KTN1     |
| 5.47E-20 | 0.352755715 | 0.993 | 0.982 | 8.56E-16 | RPS29    |
| 6.96E-20 | 0.299804808 | 1     | 0.993 | 1.09E-15 | RPS26    |
| 8.24E-20 | 0.318653281 | 0.854 | 0.662 | 1.29E-15 | RHOA     |
| 2.01E-19 | 0.253670804 | 0.371 | 0.178 | 3.14E-15 | RNF167   |
| 2.44E-19 | 0.273755314 | 0.415 | 0.212 | 3.82E-15 | MANF     |
| 2.77E-19 | 0.347350705 | 0.675 | 0.447 | 4.33E-15 | C12orf57 |
| 3.99E-19 | 0.264597327 | 0.527 | 0.298 | 6.24E-15 | DCTN3    |
| 5.42E-19 | 0.356561003 | 0.784 | 0.589 | 8.47E-15 | RAN      |
| 7.58E-19 | 0.27811252  | 0.42  | 0.222 | 1.18E-14 | SSNA1    |
| 8.29E-19 | 0.302151071 | 0.871 | 0.683 | 1.30E-14 | COMMD6   |
| 1.01E-18 | 0.287329154 | 0.473 | 0.263 | 1.58E-14 | SP100    |
| 1.29E-18 | 0.258200504 | 0.364 | 0.178 | 2.01E-14 | POLR2G   |
| 1.76E-18 | 0.311267414 | 0.862 | 0.703 | 2.76E-14 | UBL5     |
| 2.06E-18 | 0.300162994 | 0.587 | 0.35  | 3.22E-14 | MTDH     |

|          |             |       |       |            |          |
|----------|-------------|-------|-------|------------|----------|
| 2.33E-18 | 0.292929117 | 0.318 | 0.149 | 3.64E-14   | SYNGR1   |
| 3.22E-18 | 0.25975441  | 0.49  | 0.272 | 5.04E-14   | SERPINB1 |
| 5.06E-18 | 0.337604608 | 0.995 | 0.994 | 7.91E-14   | RPL3     |
| 6.12E-18 | 0.321590908 | 0.643 | 0.397 | 9.57E-14   | TUBA1B   |
| 8.14E-18 | 0.279813832 | 0.483 | 0.274 | 1.27E-13   | CDV3     |
| 8.83E-18 | 0.283005945 | 0.524 | 0.307 | 1.38E-13   | TMBIM4   |
| 1.27E-17 | 0.303465174 | 0.57  | 0.357 | 1.98E-13   | RNF7     |
| 1.47E-17 | 0.285693635 | 0.405 | 0.217 | 2.31E-13   | FAM107B  |
| 5.15E-17 | 0.306893296 | 0.556 | 0.346 | 8.06E-13   | YWHAQ    |
| 6.95E-17 | 0.298806284 | 0.709 | 0.489 | 1.09E-12   | ATP6V1G1 |
| 1.00E-16 | 0.382027854 | 0.947 | 0.921 | 1.56E-12   | IL32     |
| 1.44E-16 | 0.270678298 | 0.498 | 0.29  | 2.25E-12   | SRSF3    |
| 1.47E-16 | 0.263039818 | 0.524 | 0.315 | 2.29E-12   | FKBP8    |
| 1.91E-16 | 0.264692094 | 0.658 | 0.424 | 2.98E-12   | TMEM59   |
| 3.46E-16 | 0.279213798 | 0.498 | 0.295 | 5.41E-12   | NOP53    |
| 5.13E-16 | 0.291197768 | 0.609 | 0.389 | 8.02E-12   | RHOC     |
| 5.34E-16 | 0.265522061 | 0.561 | 0.348 | 8.36E-12   | NAP1L1   |
| 6.74E-16 | 0.273149657 | 0.561 | 0.353 | 1.05E-11   | REX1BD   |
| 9.86E-16 | 0.274498723 | 0.573 | 0.366 | 1.54E-11   | DYNLRB1  |
| 5.79E-15 | 0.261894763 | 0.859 | 0.659 | 9.05E-11   | PPIB     |
| 8.63E-15 | 0.279864845 | 0.706 | 0.479 | 1.35E-10   | EIF5A    |
| 8.78E-15 | 0.258727543 | 0.624 | 0.414 | 1.37E-10   | SNRPG    |
| 1.39E-14 | 0.256327545 | 0.539 | 0.34  | 2.17E-10   | CALM3    |
| 1.78E-14 | 0.281485812 | 0.716 | 0.516 | 2.78E-10   | EIF3G    |
| 2.21E-14 | 0.275015869 | 0.75  | 0.542 | 3.46E-10   | SERP1    |
| 2.41E-14 | 0.260716455 | 0.381 | 0.214 | 3.77E-10   | GSPT1    |
| 5.92E-14 | 0.259474688 | 0.541 | 0.344 | 9.26E-10   | PRR13    |
| 6.88E-14 | 0.265683902 | 0.549 | 0.362 | 1.08E-09   | ANAPC16  |
| 1.62E-13 | 0.326072256 | 0.398 | 0.239 | 2.54E-09   | ANP32A   |
| 2.26E-13 | 0.262747664 | 0.903 | 0.781 | 3.54E-09   | EIF4A1   |
| 2.32E-13 | 0.250659519 | 0.422 | 0.253 | 3.63E-09   | UBE2F    |
| 3.64E-11 | 0.271743521 | 0.481 | 0.325 | 5.69E-07   | LIME1    |
| 8.12E-11 | 0.323538065 | 0.41  | 0.262 | 1.27E-06   | H1FX     |
| 3.14E-08 | 0.255243193 | 0.842 | 0.754 | 0.00049106 | LDHA     |



Supplementary Table 5. Genes of pseudo-time series-related modules (related to Fig. 5)

| Group    | Gene     | Group    | Gene    | Group    | Gene      | Group    | Gene     | Group    | Gene     |
|----------|----------|----------|---------|----------|-----------|----------|----------|----------|----------|
| Module 1 | ISG15    | Module 2 | HES4    | Module 3 | VWA1      | Module 4 | MASP2    | Module 5 | RPL22    |
| Module 1 | TNFRSF18 | Module 2 | CCNL2   | Module 3 | ESPN      | Module 4 | ALDH4A1  | Module 5 | SRM      |
| Module 1 | SDF4     | Module 2 | CDK11B  | Module 3 | RBP7      | Module 4 | CAMK2N1  | Module 5 | AKR7A2   |
| Module 1 | GNB1     | Module 2 | ERRF1   | Module 3 | DDI2      | Module 4 | SERINC2  | Module 5 | RPL11    |
| Module 1 | TNFRSF14 | Module 2 | H6PD    | Module 3 | HSPG2     | Module 4 | ECHDC2   | Module 5 | ZNF593   |
| Module 1 | KCNAB2   | Module 2 | KIF1B   | Module 3 | CLIC4     | Module 4 | SCP2     | Module 5 | EIF3I    |
| Module 1 | ENO1     | Module 2 | MTHFR   | Module 3 | FAM110D   | Module 4 | CPT2     | Module 5 | MEAF6    |
| Module 1 | CLSTN1   | Module 2 | DHRS3   | Module 3 | TINAGL1   | Module 4 | ANGPTL3  | Module 5 | RPS8     |
| Module 1 | AGTRAP   | Module 2 | PLEKHM2 | Module 3 | FAM167B   | Module 4 | AK4      | Module 5 | UQCRH    |
| Module 1 | TNFRSF1B | Module 2 | IGSF21  | Module 3 | GJA4      | Module 4 | ACADM    | Module 5 | PDZK1IP1 |
| Module 1 | PRDM2    | Module 2 | MICOS10 | Module 3 | PABPC4    | Module 4 | CNN3     | Module 5 | MRPL37   |
| Module 1 | EFHD2    | Module 2 | PLA2G2A | Module 3 | TIE1      | Module 4 | PHGDH    | Module 5 | RPL5     |
| Module 1 | SPEP     | Module 2 | CDA     | Module 3 | PLPP3     | Module 4 | PDZK1    | Module 5 | MRPS21   |
| Module 1 | SZRD1    | Module 2 | ECE1    | Module 3 | C8B       | Module 4 | HJV      | Module 5 | PSMD4    |
| Module 1 | NECAP2   | Module 2 | C1QA    | Module 3 | NFIA      | Module 4 | FMO5     | Module 5 | S100A10  |
| Module 1 | RCC2     | Module 2 | C1QC    | Module 3 | LINC01702 | Module 4 | CERS2    | Module 5 | RPS27    |
| Module 1 | CAPZB    | Module 2 | C1QB    | Module 3 | ADGRL4    | Module 4 | SELENBP1 | Module 5 | CC73     |
| Module 1 | HP1BP3   | Module 2 | ID3     | Module 3 | DDAH1     | Module 4 | RAB13    | Module 5 | MRPL24   |
| Module 1 | CDC42    | Module 2 | SELENON | Module 3 | CCN1      | Module 4 | KRTCAP2  | Module 5 | UFC1     |
| Module 1 | LUZP1    | Module 2 | UBXN11  | Module 3 | ARHGAP29  | Module 4 | FDPS     | Module 5 | GAS5     |
| Module 1 | HNRNPR   | Module 2 | NR0B2   | Module 3 | ABCD3     | Module 4 | GLMP     | Module 5 | GLUL     |
| Module 1 | PNRC2    | Module 2 | WASF2   | Module 3 | TLCD4     | Module 4 | RHBG     | Module 5 | ARPC5    |
| Module 1 | SRSF10   | Module 2 | IFI6    | Module 3 | PALMD     | Module 4 | APOA2    | Module 5 | SNRPE    |
| Module 1 | SRRM1    | Module 2 | THEMIS2 | Module 3 | HMGCS2    | Module 4 | ALDH9A1  | Module 5 | NENF     |
| Module 1 | RUNX3    | Module 2 | PTAFR   | Module 3 | PDE4DIP   | Module 4 | MPC2     | Module 5 | SMYD2    |
| Module 1 | SYF2     | Module 2 | ATP5IF1 | Module 3 | RORC      | Module 4 | FMO3     | Module 5 | GUK1     |
| Module 1 | RSRP1    | Module 2 | PHACTR4 | Module 3 | S100A13   | Module 4 | PRDX6    | Module 5 | RAB4A    |
| Module 1 | TMEM50A  | Module 2 | SDC3    | Module 3 | NPR1      | Module 4 | SERPINC1 | Module 5 | NTPCR    |
| Module 1 | STMN1    | Module 2 | PUM1    | Module 3 | SHE       | Module 4 | CFHR1    | Module 5 | COX20    |
| Module 1 | SH3BGRL3 | Module 2 | PHC2    | Module 3 | ADAM15    | Module 4 | TIMM17A  | Module 5 | RPS7     |
| Module 1 | CD52     | Module 2 | TMEM35B | Module 3 | EFNA1     | Module 4 | ETNK2    | Module 5 | IAH1     |
| Module 1 | HMG2     | Module 2 | EVA1B   | Module 3 | NES       | Module 4 | GOLT1A   | Module 5 | ODC1     |
| Module 1 | ARID1A   | Module 2 | RRACG   | Module 3 | APCS      | Module 4 | C4BPB    | Module 5 | SF3B6    |
| Module 1 | SYTL1    | Module 2 | MFSD2A  | Module 3 | PEX19     | Module 4 | C4BPA    | Module 5 | TP53I3   |
| Module 1 | FGR      | Module 2 | PPT1    | Module 3 | ADAMTS4   | Module 4 | HSD11B1  | Module 5 | OST4     |
| Module 1 | SNHG12   | Module 2 | PTPRF   | Module 3 | CREG1     | Module 4 | IRF6     | Module 5 | RPS27A   |
| Module 1 | SRSF4    | Module 2 | ATP6V0B | Module 3 | ATP1B1    | Module 4 | KCTD3    | Module 5 | ANXA4    |
| Module 1 | LAPTM5   | Module 2 | MKNK1   | Module 3 | F5        | Module 4 | EPRS     | Module 5 | RPL31    |
| Module 1 | PTP4A2   | Module 2 | EFCAB14 | Module 3 | SELE      | Module 4 | ENAH     | Module 5 | CHCHD5   |
| Module 1 | KHDRBS1  | Module 2 | CYP4A11 | Module 3 | RASAL2    | Module 4 | SRP9     | Module 5 | MZT2B    |
| Module 1 | LCK      | Module 2 | CYP4A22 | Module 3 | RALGPS2   | Module 4 | EPHX1    | Module 5 | MZT2A    |
| Module 1 | HDAC1    | Module 2 | TMEM59  | Module 3 | TOR1AIP2  | Module 4 | COQ8A    | Module 5 | METTL5   |
| Module 1 | MARCKSL1 | Module 2 | DHCR24  | Module 3 | NPL       | Module 4 | SCCPDH   | Module 5 | OLA1     |
| Module 1 | RNF19B   | Module 2 | C8A     | Module 3 | LAMC1     | Module 4 | ADI1     | Module 5 | ATP5MC3  |
| Module 1 | SFPQ     | Module 2 | JUN     | Module 3 | CFH       | Module 4 | LAPTM4A  | Module 5 | HSPD1    |
| Module 1 | MAP7D1   | Module 2 | HOOK1   | Module 3 | CFHR2     | Module 4 | HADHB    | Module 5 | HSPF1    |
| Module 1 | THRAP3   | Module 2 | LEPROT  | Module 3 | CFHR5     | Module 4 | KHK      | Module 5 | EEF1B2   |
| Module 1 | CSF3R    | Module 2 | LEPR    | Module 3 | F13B      | Module 4 | COX5B    | Module 5 | RPL37A   |
| Module 1 | ZC3H12A  | Module 2 | SLC35D1 | Module 3 | CD34      | Module 4 | PROC     | Module 5 | COPSP9   |
| Module 1 | AKIRIN1  | Module 2 | GADD45A | Module 3 | ATF3      | Module 4 | ACMSD    | Module 5 | RPL32    |
| Module 1 | NDUFS5   | Module 2 | CTH     | Module 3 | SLC30A10  | Module 4 | DPP4     | Module 5 | RPL15    |
| Module 1 | MACF1    | Module 2 | IFI44L  | Module 3 | C1orf115  | Module 4 | TFPI     | Module 5 | CRTPA    |
| Module 1 | CAP1     | Module 2 | IFI44   | Module 3 | MARC2     | Module 4 | MYO1B    | Module 5 | RPSA     |
| Module 1 | SMAP2    | Module 2 | GNG5    | Module 3 | RHOU      | Module 4 | SPATS2L  | Module 5 | RPL14    |
| Module 1 | NYFC     | Module 2 | GBP3    | Module 3 | AGT       | Module 4 | AOX1     | Module 5 | IMPDH2   |
| Module 1 | YBX1     | Module 2 | GBP1    | Module 3 | CHRM3     | Module 4 | NDUFB3   | Module 5 | RPL29    |
| Module 1 | PLK3     | Module 2 | GBP7    | Module 3 | PXDN      | Module 4 | IDH1     | Module 5 | TKT      |
| Module 1 | NASP     | Module 2 | SLC35A3 | Module 3 | ASAP2     | Module 4 | IGFBP2   | Module 5 | RPL24    |
| Module 1 | PIK3R3   | Module 2 | DBT     | Module 3 | ROCK2     | Module 4 | CYP27A1  | Module 5 | FAM162A  |
| Module 1 | NRDC     | Module 2 | S1PR1   | Module 3 | SDC1      | Module 4 | CHPF     | Module 5 | SSR3     |
| Module 1 | TUT4     | Module 2 | AMPD2   | Module 3 | RHOB      | Module 4 | PSMD1    | Module 5 | RPL22L1  |
| Module 1 | MAGOH    | Module 2 | AHCYL1  | Module 3 | HADHA     | Module 4 | SPP2     | Module 5 | RPL35A   |

|          |            |          |          |          |          |          |           |          |          |
|----------|------------|----------|----------|----------|----------|----------|-----------|----------|----------|
| Module 1 | JAK1       | Module 2 | C1orf162 | Module 3 | RASGRP3  | Module 4 | RAMP1     | Module 5 | RPL9     |
| Module 1 | PDE4B      | Module 2 | RHOC     | Module 3 | HAO      | Module 4 | HDLBP     | Module 5 | OCIAD2   |
| Module 1 | MIER1      | Module 2 | HAO2     | Module 3 | MCFD2    | Module 4 | ACAA1     | Module 5 | RPL34    |
| Module 1 | SRSF11     | Module 2 | NOTCH2   | Module 3 | RTN4     | Module 4 | ACY1      | Module 5 | SNHG8    |
| Module 1 | CTBS       | Module 2 | TXNIP    | Module 3 | EVA1A    | Module 4 | SPCS1     | Module 5 | RPS3A    |
| Module 1 | C1orf52    | Module 2 | NBPF19   | Module 3 | TCF7L1   | Module 4 | ACOX2     | Module 5 | RPL37    |
| Module 1 | BCL10      | Module 2 | APH1A    | Module 3 | PLGLB2   | Module 4 | SUCLG2    | Module 5 | BTf3     |
| Module 1 | ODF2L      | Module 2 | C1orf54  | Module 3 | MALL     | Module 4 | NDUFB4    | Module 5 | TBCA     |
| Module 1 | SH3GLB1    | Module 2 | CTSS     | Module 3 | STEAP3   | Module 4 | HGD       | Module 5 | RPS23    |
| Module 1 | LMO4       | Module 2 | POGZ     | Module 3 | TMEM37   | Module 4 | ALDH1L1   | Module 5 | COX7C    |
| Module 1 | PKN2       | Module 2 | CGN      | Module 3 | LIMS2    | Module 4 | SLC2A2    | Module 5 | HINT1    |
| Module 1 | GTF2B      | Module 2 | S100A16  | Module 3 | KYNU     | Module 4 | AHSG      | Module 5 | VDAC1    |
| Module 1 | GBP2       | Module 2 | SLC27A3  | Module 3 | COBLL1   | Module 4 | KNG1      | Module 5 | SKP1     |
| Module 1 | GBP4       | Module 2 | UBAP2L   | Module 3 | NOSTRIN  | Module 4 | CPN2      | Module 5 | HSPA9    |
| Module 1 | GBP5       | Module 2 | IL6R     | Module 3 | ABCB11   | Module 4 | SLC51A    | Module 5 | RPS14    |
| Module 1 | ZNF644     | Module 2 | ADAR     | Module 3 | ITGA6    | Module 4 | BDH1      | Module 5 | ATOX1    |
| Module 1 | TGFBR3     | Module 2 | LMNA     | Module 3 | MAP3K20  | Module 4 | HGFAC     | Module 5 | CCNG1    |
| Module 1 | TMED5      | Module 2 | ACKR1    | Module 3 | NCKAP1   | Module 4 | FAM114A1  | Module 5 | NPM1     |
| Module 1 | DNTTIP2    | Module 2 | CRP      | Module 3 | CALCRL   | Module 4 | SMIM14    | Module 5 | HIGD2A   |
| Module 1 | AGL        | Module 2 | IGSF8    | Module 3 | SLC40A1  | Module 4 | UGT2B4    | Module 5 | PRELID1  |
| Module 1 | VCAM1      | Module 2 | PEA15    | Module 3 | INPP1    | Module 4 | ALB       | Module 5 | NHP2     |
| Module 1 | PRPF38B    | Module 2 | DCAF8    | Module 3 | CAVIN2   | Module 4 | STBD1     | Module 5 | SQSTM1   |
| Module 1 | GNAI3      | Module 2 | CD84     | Module 3 | HECW2    | Module 4 | SPP1      | Module 5 | RACK1    |
| Module 1 | CD53       | Module 2 | F11R     | Module 3 | RAPH1    | Module 4 | ADH4      | Module 5 | CAP2     |
| Module 1 | DRAM2      | Module 2 | FCER1G   | Module 3 | FN1      | Module 4 | ADH6      | Module 5 | HIST1H1C |
| Module 1 | DENND2D    | Module 2 | NR1I3    | Module 3 | IGFBP5   | Module 4 | ADH1A     | Module 5 | UBD      |
| Module 1 | RAP1A      | Module 2 | FCGR2A   | Module 3 | IRS1     | Module 4 | ADH1B     | Module 5 | TUBB     |
| Module 1 | CAPZA1     | Module 2 | HSPA6    | Module 3 | C2orf72  | Module 4 | ADH1C     | Module 5 | CSNK2B   |
| Module 1 | RSBN1      | Module 2 | ATF6     | Module 3 | AGXT     | Module 4 | MGST2     | Module 5 | LSM2     |
| Module 1 | PTPN22     | Module 2 | UAP1     | Module 3 | LMCD1    | Module 4 | FGG       | Module 5 | RPS18    |
| Module 1 | HIPK1      | Module 2 | TMCO1    | Module 3 | CAMK1    | Module 4 | MSMO1     | Module 5 | UQCC2    |
| Module 1 | BCAS2      | Module 2 | DCAF6    | Module 3 | SLC6A1   | Module 4 | NDUFS6    | Module 5 | RPS10    |
| Module 1 | CSDE1      | Module 2 | SEC16B   | Module 3 | FBLN2    | Module 4 | AMACR     | Module 5 | SNRPC    |
| Module 1 | ATP1A1     | Module 2 | ABL2     | Module 3 | FGD5     | Module 4 | NADK2     | Module 5 | RPL10A   |
| Module 1 | CD2        | Module 2 | QSOX1    | Module 3 | CLEC3B   | Module 4 | HMGCS1    | Module 5 | TOMM6    |
| Module 1 | MAN1A2     | Module 2 | RGS16    | Module 3 | MST1     | Module 4 | BHMT2     | Module 5 | DNPH1    |
| Module 1 | TENT5C     | Module 2 | NCF2     | Module 3 | SEMA3F   | Module 4 | RHOBTB3   | Module 5 | HSP90AB1 |
| Module 1 | LINC00623  | Module 2 | RGL1     | Module 3 | SLC38A3  | Module 4 | LINC01554 | Module 5 | GCLC     |
| Module 1 | CD160      | Module 2 | EDEM3    | Module 3 | HYAL1    | Module 4 | CDO1      | Module 5 | EEF1A1   |
| Module 1 | RBM8A      | Module 2 | PRG4     | Module 3 | HYAL2    | Module 4 | HSD17B4   | Module 5 | SNHG5    |
| Module 1 | AC245297.3 | Module 2 | PTGS2    | Module 3 | ALAS1    | Module 4 | UQCRCQ    | Module 5 | SNX3     |
| Module 1 | PLEKHO1    | Module 2 | CFHR3    | Module 3 | GLYCTK   | Module 4 | LEAP2     | Module 5 | RPS12    |
| Module 1 | ANP32E     | Module 2 | CFHR4    | Module 3 | ITIH1    | Module 4 | SIL1      | Module 5 | SF3B5    |
| Module 1 | MCL1       | Module 2 | ZNF281   | Module 3 | ITIH3    | Module 4 | LINC01485 | Module 5 | PSMB1    |
| Module 1 | C1orf56    | Module 2 | CSRP1    | Module 3 | CHDH     | Module 4 | ECI2      | Module 5 | TOMM7    |
| Module 1 | CDC42SE1   | Module 2 | ELF3     | Module 3 | DNASE1L3 | Module 4 | HULC      | Module 5 | MRPS24   |
| Module 1 | S100A11    | Module 2 | CHI3L1   | Module 3 | FAM107A  | Module 4 | TMEM14C   | Module 5 | PPIA     |
| Module 1 | S100A9     | Module 2 | PPP1R15B | Module 3 | ROBO1    | Module 4 | APOM      | Module 5 | CCT6A    |
| Module 1 | S100A8     | Module 2 | NUCKS1   | Module 3 | COL8A1   | Module 4 | YIPF3     | Module 5 | MDH2     |
| Module 1 | S100A6     | Module 2 | RAB7B    | Module 3 | MYLK     | Module 4 | TMEM14A   | Module 5 | HSPB1    |
| Module 1 | S100A4     | Module 2 | PIGR     | Module 3 | GATA2    | Module 4 | GSTA1     | Module 5 | ARPC1A   |
| Module 1 | TPM3       | Module 2 | CD46     | Module 3 | ACAD11   | Module 4 | ARG1      | Module 5 | STMP1    |
| Module 1 | ASH1L      | Module 2 | G0S2     | Module 3 | TF       | Module 4 | AIG1      | Module 5 | SSBP1    |
| Module 1 | SSR2       | Module 2 | SLC30A1  | Module 3 | SLCO2A1  | Module 4 | CLDN3     | Module 5 | DEFB1    |
| Module 1 | MEF2D      | Module 2 | LPGAT1   | Module 3 | RBP1     | Module 4 | PON2      | Module 5 | LYPLA1   |
| Module 1 | ISG20L2    | Module 2 | BATF3    | Module 3 | PLOD2    | Module 4 | SLC25A13  | Module 5 | RPS20    |
| Module 1 | SH2D2A     | Module 2 | PROX1    | Module 3 | AGTR1    | Module 4 | SEM1      | Module 5 | SNHG6    |
| Module 1 | ETV3       | Module 2 | IARS2    | Module 3 | TM4SF18  | Module 4 | BRI3      | Module 5 | RPL7     |
| Module 1 | MNDA       | Module 2 | DUSP10   | Module 3 | TM4SF1   | Module 4 | ATP5MF    | Module 5 | ZFAND1   |
| Module 1 | PYHIN1     | Module 2 | MIA3     | Module 3 | TM4SF4   | Module 4 | CYP3A4    | Module 5 | RBIS     |
| Module 1 | IFI16      | Module 2 | ACBD3    | Module 3 | WWTR1    | Module 4 | ZNHIT1    | Module 5 | UQCRCB   |
| Module 1 | FCRL6      | Module 2 | ITPKB    | Module 3 | AADAC    | Module 4 | CALD1     | Module 5 | RPL30    |
| Module 1 | TAGLN2     | Module 2 | IRF2BP2  | Module 3 | MECOM    | Module 4 | TMEM176B  | Module 5 | POLR2K   |
| Module 1 | COPA       | Module 2 | NID1     | Module 3 | GNB4     | Module 4 | TMEM176A  | Module 5 | PABPC1   |

|          |           |          |         |          |           |          |          |          |          |
|----------|-----------|----------|---------|----------|-----------|----------|----------|----------|----------|
| Module 1 | CD48      | Module 2 | CEP170  | Module 3 | EHHADH    | Module 4 | INSIG1   | Module 5 | EIF3E    |
| Module 1 | SLAMF7    | Module 2 | AKT3    | Module 3 | FETUB     | Module 4 | CLU      | Module 5 | EIF3H    |
| Module 1 | ARHGAP30  | Module 2 | CNST    | Module 3 | HRG       | Module 4 | CYP7A1   | Module 5 | MRPL13   |
| Module 1 | FCGR3A    | Module 2 | NLRP3   | Module 3 | CLDN1     | Module 4 | ASPH     | Module 5 | TATDN1   |
| Module 1 | FCGR3B    | Module 2 | ID2     | Module 3 | HES1      | Module 4 | GGH      | Module 5 | GSDMD    |
| Module 1 | UHMK1     | Module 2 | ADAM17  | Module 3 | LIMCH1    | Module 4 | DECR1    | Module 5 | EEF1D    |
| Module 1 | CD247     | Module 2 | HPCAL1  | Module 3 | KDR       | Module 4 | SDC2     | Module 5 | EXOSC4   |
| Module 1 | RCSL1     | Module 2 | PDIA6   | Module 3 | IGFBP7    | Module 4 | CPQ      | Module 5 | CYC1     |
| Module 1 | XCL2      | Module 2 | APOB    | Module 3 | UGT2B15   | Module 4 | COX6C    | Module 5 | VPS28    |
| Module 1 | XCL1      | Module 2 | RAB10   | Module 3 | UGT2B10   | Module 4 | DPYS     | Module 5 | RPL8     |
| Module 1 | PRRC2C    | Module 2 | CRIM1   | Module 3 | GC        | Module 4 | NDUFB9   | Module 5 | RPS6     |
| Module 1 | FASLG     | Module 2 | FEZ2    | Module 3 | SPARCL1   | Module 4 | NAPRT    | Module 5 | CLTA     |
| Module 1 | RABGAP1L  | Module 2 | SLC8A1  | Module 3 | ABCG2     | Module 4 | GPA1     | Module 5 | ALDH1A1  |
| Module 1 | CEP350    | Module 2 | ABCG8   | Module 3 | MTTP      | Module 4 | AK3      | Module 5 | TLE1     |
| Module 1 | IER5      | Module 2 | EPAS1   | Module 3 | EMCN      | Module 4 | GRHPR    | Module 5 | SEC81B   |
| Module 1 | DHX9      | Module 2 | RHOQ    | Module 3 | PLA2G12A  | Module 4 | BAAT     | Module 5 | CTNNA1   |
| Module 1 | C1orf21   | Module 2 | SPTBN1  | Module 3 | CFI       | Module 4 | GNG10    | Module 5 | TXN      |
| Module 1 | IVNS1ABP  | Module 2 | CCDC88A | Module 3 | FAM241A   | Module 4 | HSDL2    | Module 5 | PTGR1    |
| Module 1 | TPR       | Module 2 | UGP2    | Module 3 | NDUFC1    | Module 4 | AMBP     | Module 5 | RPL35    |
| Module 1 | RGS1      | Module 2 | PEL1    | Module 3 | FGB       | Module 4 | LCN2     | Module 5 | RPL12    |
| Module 1 | RGS2      | Module 2 | RAB1A   | Module 3 | FGA       | Module 4 | C8G      | Module 5 | C9orf16  |
| Module 1 | PTPRC     | Module 2 | PCYOX1  | Module 3 | ETFDH     | Module 4 | AKR1C4   | Module 5 | RPL7A    |
| Module 1 | ARL8A     | Module 2 | NAGK    | Module 3 | TMEM192   | Module 4 | PHYH     | Module 5 | PHT1     |
| Module 1 | PTPN7     | Module 2 | ZNF638  | Module 3 | CPE       | Module 4 | A1CF     | Module 5 | EDF1     |
| Module 1 | BTG2      | Module 2 | DYSF    | Module 3 | F11       | Module 4 | PCBD1    | Module 5 | AKR1C1   |
| Module 1 | ATP2B4    | Module 2 | NAT8    | Module 3 | LINC01018 | Module 4 | ADK      | Module 5 | AKR1C2   |
| Module 1 | RAB29     | Module 2 | TGOLN2  | Module 3 | AGXT2     | Module 4 | GLUD1    | Module 5 | AKR1C3   |
| Module 1 | RASSF5    | Module 2 | RETSAT  | Module 3 | LIFR      | Module 4 | PANK1    | Module 5 | ATP5F1C  |
| Module 1 | MAPKAPK2  | Module 2 | GGCX    | Module 3 | SELENOP   | Module 4 | RBP4     | Module 5 | PPA1     |
| Module 1 | FCMR      | Module 2 | VAMP8   | Module 3 | ESM1      | Module 4 | GSTO1    | Module 5 | VDAC2    |
| Module 1 | CD55      | Module 2 | VAMP5   | Module 3 | PLPP1     | Module 4 | PRDX3    | Module 5 | COMTD1   |
| Module 1 | TRAF3IP3  | Module 2 | CHMP3   | Module 3 | MAP1B     | Module 4 | HTRA1    | Module 5 | RPS24    |
| Module 1 | CAPN2     | Module 2 | PLGLB1  | Module 3 | HEXB      | Module 4 | ACADSB   | Module 5 | PDLIM1   |
| Module 1 | WDR26     | Module 2 | FABP1   | Module 3 | DMGDH     | Module 4 | BNIP3    | Module 5 | TALDO1   |
| Module 1 | LBR       | Module 2 | IGKC    | Module 3 | NR2F1     | Module 4 | PRAP1    | Module 5 | RPLP2    |
| Module 1 | H3F3A     | Module 2 | TMEM127 | Module 3 | SEMA6A    | Module 4 | FUOM     | Module 5 | TAF10    |
| Module 1 | PARP1     | Module 2 | MAP4K4  | Module 3 | PPIC      | Module 4 | CYP2E1   | Module 5 | EIF3F    |
| Module 1 | ARF1      | Module 2 | LIMS1   | Module 3 | ZNF608    | Module 4 | IFITM3   | Module 5 | PSMA1    |
| Module 1 | ARID4B    | Module 2 | MERTK   | Module 3 | SHROOM1   | Module 4 | SLC22A18 | Module 5 | RPS13    |
| Module 1 | LYST      | Module 2 | IL1B    | Module 3 | SAR1B     | Module 4 | MRPL17   | Module 5 | EIF3M    |
| Module 1 | HNRNPU    | Module 2 | IL1RN   | Module 3 | LECT2     | Module 4 | CAT      | Module 5 | FTH1     |
| Module 1 | AHCTF1    | Module 2 | DBI     | Module 3 | TGFBI     | Module 4 | MDK      | Module 5 | EEF1G    |
| Module 1 | LINC01871 | Module 2 | RALB    | Module 3 | CTNNA1    | Module 4 | TM7SF2   | Module 5 | PPP1R14B |
| Module 1 | LINC00299 | Module 2 | PTPN18  | Module 3 | ECSCR     | Module 4 | CTSF     | Module 5 | TRMT112  |
| Module 1 | YWHAQ     | Module 2 | PLEKHB2 | Module 3 | CD14      | Module 4 | CTTN     | Module 5 | ARL2     |
| Module 1 | SLC66A3   | Module 2 | UBXN4   | Module 3 | PCDH12    | Module 4 | ACAT1    | Module 5 | STAR10   |
| Module 1 | LPIN1     | Module 2 | RND3    | Module 3 | SYNPO     | Module 4 | SDHD     | Module 5 | RPS3     |
| Module 1 | FAM49A    | Module 2 | FMNL2   | Module 3 | SPARC     | Module 4 | MGST1    | Module 5 | CLNS1A   |
| Module 1 | ITSN2     | Module 2 | BAZZ2B  | Module 3 | F12       | Module 4 | SLCO1B3  | Module 5 | CRYAB    |
| Module 1 | FOSL2     | Module 2 | CD302   | Module 3 | BTNL9     | Module 4 | KRT8     | Module 5 | RPS25    |
| Module 1 | PPP1CB    | Module 2 | DYNC112 | Module 3 | FOXC1     | Module 4 | PPP1R1A  | Module 5 | HSPA8    |
| Module 1 | YPEL5     | Module 2 | ITPRID2 | Module 3 | NRN1      | Module 4 | HSD17B6  | Module 5 | GAPDH    |
| Module 1 | LBH       | Module 2 | CFLAR   | Module 3 | DSP       | Module 4 | NR1H4    | Module 5 | TM7SF3   |
| Module 1 | BIRC6     | Module 2 | BMPR2   | Module 3 | EDN1      | Module 4 | PAH      | Module 5 | KRT7     |
| Module 1 | CDC42EP3  | Module 2 | NRP2    | Module 3 | ALDH5A1   | Module 4 | ALDH2    | Module 5 | KRT18    |
| Module 1 | SRSF7     | Module 2 | KLF7    | Module 3 | C2        | Module 4 | PEBP1    | Module 5 | ATP5MC2  |
| Module 1 | EML4      | Module 2 | FZD5    | Module 3 | CFB       | Module 4 | HPD      | Module 5 | RPS26    |
| Module 1 | ZFP36L2   | Module 2 | CPS1    | Module 3 | GNMT      | Module 4 | PXMP2    | Module 5 | PTGES3   |
| Module 1 | CALM2     | Module 2 | GPBAR1  | Module 3 | ADGRF5    | Module 4 | CRYL1    | Module 5 | NACA     |
| Module 1 | REL       | Module 2 | SLC11A1 | Module 3 | MMUT      | Module 4 | EBPL     | Module 5 | SLC25A3  |
| Module 1 | USP34     | Module 2 | EPHA4   | Module 3 | COL21A1   | Module 4 | RNASE4   | Module 5 | RPL6     |
| Module 1 | ACTR2     | Module 2 | UGT1A1  | Module 3 | FILIP1    | Module 4 | DHRS2    | Module 5 | RPLP0    |
| Module 1 | PLEK      | Module 2 | SEPTIN2 | Module 3 | NT5E      | Module 4 | PCK2     | Module 5 | RPL21    |
| Module 1 | AAK1      | Module 2 | STK25   | Module 3 | LAMA4     | Module 4 | CFL2     | Module 5 | GTF3A    |

|          |          |          |           |          |           |          |          |          |           |
|----------|----------|----------|-----------|----------|-----------|----------|----------|----------|-----------|
| Module 1 | MXD1     | Module 2 | ARL8B     | Module 3 | GJA1      | Module 4 | MTHFD1   | Module 5 | POLR1D    |
| Module 1 | PCBP1    | Module 2 | EDEM1     | Module 3 | CCN2      | Module 4 | SERPINA6 | Module 5 | ESD       |
| Module 1 | SNRPG    | Module 2 | HRH1      | Module 3 | PERP      | Module 4 | SERPINA1 | Module 5 | APEX1     |
| Module 1 | DGUOK    | Module 2 | XPC       | Module 3 | RAB32     | Module 4 | SERPINA5 | Module 5 | MRPL52    |
| Module 1 | MOB1A    | Module 2 | FGD5-AS1  | Module 3 | AKAP12    | Module 4 | SORD     | Module 5 | PSMB5     |
| Module 1 | MTHFD2   | Module 2 | SH3BP5    | Module 3 | MYCT1     | Module 4 | GATM     | Module 5 | PSME2     |
| Module 1 | POLE4    | Module 2 | UBE2E1    | Module 3 | SLC22A1   | Module 4 | AQP9     | Module 5 | SPTSSA    |
| Module 1 | TMSB10   | Module 2 | TGFBR2    | Module 3 | PLG       | Module 4 | HACD3    | Module 5 | PSMAF     |
| Module 1 | CAPG     | Module 2 | CMTM6     | Module 3 | MPC1      | Module 4 | FAH      | Module 5 | RTRAF     |
| Module 1 | MAT2A    | Module 2 | CTNNB1    | Module 3 | RPS6KA2   | Module 4 | GNPTG    | Module 5 | GPX2      |
| Module 1 | GNLY     | Module 2 | CCR1      | Module 3 | AFDN      | Module 4 | SLC9A3R2 | Module 5 | ERH       |
| Module 1 | CD8A     | Module 2 | CCRL2     | Module 3 | FAM20C    | Module 4 | ECI1     | Module 5 | RPS27L    |
| Module 1 | CD8B     | Module 2 | MAP4      | Module 3 | NDUFA4    | Module 4 | CPPED1   | Module 5 | RPL4      |
| Module 1 | CYTOR    | Module 2 | SLC25A20  | Module 3 | THSD7A    | Module 4 | ACSM2A   | Module 5 | RPLP1     |
| Module 1 | DUSP2    | Module 2 | LAMB2     | Module 3 | AGMO      | Module 4 | ACSM2B   | Module 5 | COX5A     |
| Module 1 | ARID5A   | Module 2 | MAPKAPK3  | Module 3 | AQP1      | Module 4 | ACSM1    | Module 5 | RPS17     |
| Module 1 | SEMA4C   | Module 2 | MANF      | Module 3 | LSM5      | Module 4 | NUPR1    | Module 5 | SEC11A    |
| Module 1 | ZAP70    | Module 2 | STAB1     | Module 3 | RAMP3     | Module 4 | QPR1     | Module 5 | NME4      |
| Module 1 | EIF5B    | Module 2 | ITIH4     | Module 3 | GRB10     | Module 4 | CES1     | Module 5 | METR1     |
| Module 1 | PDCL3    | Module 2 | FLNB      | Module 3 | POR       | Module 4 | NQO1     | Module 5 | RPS2      |
| Module 1 | RNF149   | Module 2 | PTPRG     | Module 3 | ABCB4     | Module 4 | GCSH     | Module 5 | ELOB      |
| Module 1 | GCC2     | Module 2 | FRMD4B    | Module 3 | GNG11     | Module 4 | OSGIN1   | Module 5 | TNFRSF12A |
| Module 1 | RANBP2   | Module 2 | LINC00877 | Module 3 | PON3      | Module 4 | FBXO31   | Module 5 | IL32      |
| Module 1 | SLC20A1  | Module 2 | PROS1     | Module 3 | AGFG2     | Module 4 | SERPINF2 | Module 5 | RSL1D1    |
| Module 1 | ACTR3    | Module 2 | FILIP1L   | Module 3 | EPHB4     | Module 4 | SERPINF1 | Module 5 | RPS15A    |
| Module 1 | DDX18    | Module 2 | ALCAM     | Module 3 | SERPINE1  | Module 4 | TM4SF5   | Module 5 | UQCRC2    |
| Module 1 | PTPN4    | Module 2 | ATP6V1A   | Module 3 | PLOD3     | Module 4 | SLC13A5  | Module 5 | TUFM      |
| Module 1 | GYPC     | Module 2 | ZBTB20    | Module 3 | CAV2      | Module 4 | ASGR2    | Module 5 | TMEM219   |
| Module 1 | BIN1     | Module 2 | COX17     | Module 3 | CAV1      | Module 4 | ASGR1    | Module 5 | SEPHS2    |
| Module 1 | MAP3K2   | Module 2 | FSTL1     | Module 3 | MET       | Module 4 | SAT2     | Module 5 | MT1A      |
| Module 1 | CCDC115  | Module 2 | CD86      | Module 3 | PODXL     | Module 4 | SHMT1    | Module 5 | NUTF2     |
| Module 1 | CXCR4    | Module 2 | CSTA      | Module 3 | NDUFB2    | Module 4 | VTN      | Module 5 | NOB1      |
| Module 1 | ARHGAP15 | Module 2 | ITGB5     | Module 3 | PDIA4     | Module 4 | PIPOX    | Module 5 | COX4I1    |
| Module 1 | ZEB2     | Module 2 | HEG1      | Module 3 | RARRES2   | Module 4 | TMEM98   | Module 5 | APRT      |
| Module 1 | TNFAIP6  | Module 2 | OSBPL11   | Module 3 | ANGPT2    | Module 4 | CCL16    | Module 5 | RPL13     |
| Module 1 | PRPF40A  | Module 2 | MGLL      | Module 3 | SOX7      | Module 4 | CISD3    | Module 5 | C1QBP     |
| Module 1 | NR4A2    | Module 2 | RPN1      | Module 3 | DLC1      | Module 4 | IGFBP4   | Module 5 | TXNDC17   |
| Module 1 | CYTIP    | Module 2 | RAB7A     | Module 3 | MTUS1     | Module 4 | KAT2A    | Module 5 | RNASEK    |
| Module 1 | RBMS1    | Module 2 | PLXND1    | Module 3 | FGL1      | Module 4 | HLF      | Module 5 | C17orf49  |
| Module 1 | TANK     | Module 2 | CHST2     | Module 3 | TNFRSF10D | Module 4 | SNHG25   | Module 5 | GABARAP   |
| Module 1 | GCA      | Module 2 | PLSCR4    | Module 3 | STC1      | Module 4 | APOH     | Module 5 | CLDN7     |
| Module 1 | PPIG     | Module 2 | PLSCR1    | Module 3 | RBPMS     | Module 4 | GALK1    | Module 5 | EIF5A     |
| Module 1 | SSB      | Module 2 | CP        | Module 3 | TCIM      | Module 4 | P4HB     | Module 5 | TMEM256   |
| Module 1 | CIR1     | Module 2 | RNF13     | Module 3 | CEBPB     | Module 4 | ANAPC11  | Module 5 | RPL26     |
| Module 1 | WIPF1    | Module 2 | LXN       | Module 3 | SOX17     | Module 4 | NOTUM    | Module 5 | UBB       |
| Module 1 | HNRNPA3  | Module 2 | MFSD1     | Module 3 | TRIM55    | Module 4 | DCXR     | Module 5 | SNHG29    |
| Module 1 | NFE2L2   | Module 2 | BCHE      | Module 3 | FABP4     | Module 4 | NDUFV2   | Module 5 | ALDH3A2   |
| Module 1 | ITGA4    | Module 2 | GOLIM4    | Module 3 | WWP1      | Module 4 | ACAA2    | Module 5 | ALDH3A1   |
| Module 1 | ORMDL1   | Module 2 | SEC62     | Module 3 | RUNX1T1   | Module 4 | SEC11C   | Module 5 | RPL23A    |
| Module 1 | GLS      | Module 2 | TNFSF10   | Module 3 | RIDA      | Module 4 | CYB5A    | Module 5 | PSMB3     |
| Module 1 | STAT1    | Module 2 | TBL1XR1   | Module 3 | EXT1      | Module 4 | GAMT     | Module 5 | RPL23     |
| Module 1 | STAT4    | Module 2 | ZMAT3     | Module 3 | SNTB1     | Module 4 | REEP6    | Module 5 | RPL19     |
| Module 1 | NABP1    | Module 2 | ABCC5     | Module 3 | SQLE      | Module 4 | UQCR11   | Module 5 | NT5C3B    |
| Module 1 | STK17B   | Module 2 | AP2M1     | Module 3 | TRIB1     | Module 4 | PRDX2    | Module 5 | RPL27     |
| Module 1 | ANKRD44  | Module 2 | EIF4G1    | Module 3 | MYC       | Module 4 | NFIX     | Module 5 | SLC25A39  |
| Module 1 | SF3B1    | Module 2 | ETV5      | Module 3 | GPIHBP1   | Module 4 | NDUFB7   | Module 5 | CALCOCO2  |
| Module 1 | COQ10B   | Module 2 | ST6GAL1   | Module 3 | NRBP2     | Module 4 | HPN      | Module 5 | ATP5MC1   |
| Module 1 | MOB4     | Module 2 | MASP1     | Module 3 | GRINA     | Module 4 | PRODH2   | Module 5 | SNF8      |
| Module 1 | BZW1     | Module 2 | LPP       | Module 3 | RCL1      | Module 4 | BLVRB    | Module 5 | PHB       |
| Module 1 | CLK1     | Module 2 | IL1RAP    | Module 3 | IL33      | Module 4 | APOE     | Module 5 | NME1      |
| Module 1 | CD28     | Module 2 | CCDC50    | Module 3 | ACO1      | Module 4 | APOC1    | Module 5 | NME2      |
| Module 1 | XRCC5    | Module 2 | ATP13A3   | Module 3 | CHMP5     | Module 4 | APOC4    | Module 5 | TOM1L1    |
| Module 1 | ARPC2    | Module 2 | TMEM44    | Module 3 | SIGMAR1   | Module 4 | APOC2    | Module 5 | RPL38     |
| Module 1 | TUBA4A   | Module 2 | FAM43A    | Module 3 | GENE      | Module 4 | SULT2A1  | Module 5 | FDXR      |

|          |             |          |           |          |           |          |           |          |          |
|----------|-------------|----------|-----------|----------|-----------|----------|-----------|----------|----------|
| Module 1 | CCL20       | Module 2 | ATP5ME    | Module 3 | COL15A1   | Module 4 | ETFB      | Module 5 | ATP5PD   |
| Module 1 | SP110       | Module 2 | C4orf48   | Module 3 | SLC44A1   | Module 4 | SLC27A5   | Module 5 | SUMO2    |
| Module 1 | SP100       | Module 2 | SH3BP2    | Module 3 | EPB41L4B  | Module 4 | LINC00261 | Module 5 | SNHG16   |
| Module 1 | CAB39       | Module 2 | RGS12     | Module 3 | GSN       | Module 4 | FOXA2     | Module 5 | MRPL12   |
| Module 1 | NCL         | Module 2 | MSX1      | Module 3 | NIBAN2    | Module 4 | PCK1      | Module 5 | CENPX    |
| Module 1 | PTMA        | Module 2 | MRFAP1    | Module 3 | ENG       | Module 4 | SOD1      | Module 5 | MYL12B   |
| Module 1 | INPP5D      | Module 2 | LDB2      | Module 3 | AIF1L     | Module 4 | FTCD      | Module 5 | ANKRD29  |
| Module 1 | ARL4C       | Module 2 | QDPR      | Module 3 | EGFL7     | Module 4 | SLC25A18  | Module 5 | RPL17    |
| Module 1 | LRRFIP1     | Module 2 | LAP3      | Module 3 | DIPK1B    | Module 4 | SDF2L1    | Module 5 | TXNL4A   |
| Module 1 | UBE2F       | Module 2 | ADGRA3    | Module 3 | NPDC1     | Module 4 | CHCHD10   | Module 5 | GPX4     |
| Module 1 | RNPEPL1     | Module 2 | PPARGC1A  | Module 3 | MRPL41    | Module 4 | UPB1      | Module 5 | ATP5F1D  |
| Module 1 | GPR35       | Module 2 | RBPJ      | Module 3 | ITIH2     | Module 4 | UQCR10    | Module 5 | RPS15    |
| Module 1 | CRBN        | Module 2 | RBM47     | Module 3 | KIAA1217  | Module 4 | TST       | Module 5 | TIMM13   |
| Module 1 | BHLHE40     | Module 2 | OCIAD1    | Module 3 | JCAD      | Module 4 | CDC42EP1  | Module 5 | EEF2     |
| Module 1 | THUMPD3-AS1 | Module 2 | UGT2B7    | Module 3 | DEPP1     | Module 4 | ARSE      | Module 5 | RPL36    |
| Module 1 | SETD5       | Module 2 | AFM       | Module 3 | MBL2      | Module 4 | MAOA      | Module 5 | MICOS13  |
| Module 1 | ARPC4       | Module 2 | CXCL8     | Module 3 | LINC00844 | Module 4 | RGN       | Module 5 | NDUFA11  |
| Module 1 | IQSEC1      | Module 2 | CXCL1     | Module 3 | PBLD      | Module 4 | PGRMC1    | Module 5 | ALKBH7   |
| Module 1 | ANKRD28     | Module 2 | CXCL3     | Module 3 | PALD1     | Module 4 | SMARCA1   | Module 5 | RPS28    |
| Module 1 | SATB1       | Module 2 | CXCL2     | Module 3 | CDH23     | Module 4 | GPC3      | Module 5 | EIF3G    |
| Module 1 | EOMES       | Module 2 | EREG      | Module 3 | ZNF503    | Module 4 |           | Module 5 | PGLS     |
| Module 1 | CMC1        | Module 2 | NAAA      | Module 3 | MAT1A     | Module 4 |           | Module 5 | RPL18A   |
| Module 1 | CMTM7       | Module 2 | SCARB2    | Module 3 | PRXL2A    | Module 4 |           | Module 5 | UBA52    |
| Module 1 | PDCD6IP     | Module 2 | CXCL13    | Module 3 | MMRN2     | Module 4 |           | Module 5 | PDCD5    |
| Module 1 | GOLGA4      | Module 2 | BMP2K     | Module 3 | SNCG      | Module 4 |           | Module 5 | EIF3K    |
| Module 1 | MYD88       | Module 2 | SEC31A    | Module 3 | ADIRF     | Module 4 |           | Module 5 | LGALS4   |
| Module 1 | OXSRI       | Module 2 | HSD17B13  | Module 3 | HHEX      | Module 4 |           | Module 5 | ECH1     |
| Module 1 | CSRNP1      | Module 2 | FAM13A    | Module 3 | CYP2C18   | Module 4 |           | Module 5 | RPS16    |
| Module 1 | CX3CR1      | Module 2 | PDLIM5    | Module 3 | CYP2C9    | Module 4 |           | Module 5 | SNRPD2   |
| Module 1 | EIF1B       | Module 2 | MANBA     | Module 3 | GOT1      | Module 4 |           | Module 5 | RPL18    |
| Module 1 | NKTR        | Module 2 | LINC02428 | Module 3 | ABCC2     | Module 4 |           | Module 5 | FTL      |
| Module 1 | SNRK        | Module 2 | PAPSS1    | Module 3 | CPN1      | Module 4 |           | Module 5 | RPL13A   |
| Module 1 | ABHD5       | Module 2 | ANXA5     | Module 3 | SCD       | Module 4 |           | Module 5 | RPS11    |
| Module 1 | CXCR6       | Module 2 | SPRY1     | Module 3 | ATP5MD    | Module 4 |           | Module 5 | TMEM238  |
| Module 1 | CCDC12      | Module 2 | PGRMC2    | Module 3 | ECHS1     | Module 4 |           | Module 5 | RPL28    |
| Module 1 | SETD2       | Module 2 | TBC1D9    | Module 3 | CDHR5     | Module 4 |           | Module 5 | RPS5     |
| Module 1 | CAMP        | Module 2 | TLR2      | Module 3 | CD151     | Module 4 |           | Module 5 | FKBP1A   |
| Module 1 | TMA7        | Module 2 | TDO2      | Module 3 | CAVIN3    | Module 4 |           | Module 5 | C20orf27 |
| Module 1 | SHISA5      | Module 2 | CTSO      | Module 3 | HPX       | Module 4 |           | Module 5 | SMIM26   |
| Module 1 | PRKAR2A     | Module 2 | GASK1B    | Module 3 | DCHS1     | Module 4 |           | Module 5 | AHCY     |
| Module 1 | RHOA        | Module 2 | FNIP2     | Module 3 | SWAP70    | Module 4 |           | Module 5 | RPS21    |
| Module 1 | RBM6        | Module 2 | 1-Mar     | Module 3 | TEAD1     | Module 4 |           | Module 5 | CCT8     |
| Module 1 | GNAI2       | Module 2 | ANXA10    | Module 3 | BBOX1     | Module 4 |           | Module 5 | CBR1     |
| Module 1 | RASSF1      | Module 2 | HPGD      | Module 3 | CD59      | Module 4 |           | Module 5 | SNAP29   |
| Module 1 | TWF2        | Module 2 | LINC02362 | Module 3 | SLC1A2    | Module 4 |           | Module 5 | MIF      |
| Module 1 | WDR82       | Module 2 | ACSL1     | Module 3 | C11orf96  | Module 4 |           | Module 5 | EIF3L    |
| Module 1 | PBRM1       | Module 2 | MIR3945HG | Module 3 | TSPAN18   | Module 4 |           | Module 5 | TOMM22   |
| Module 1 | PRKCD       | Module 2 | LINC01093 | Module 3 | F2        | Module 4 |           | Module 5 | ST13     |
| Module 1 | DCP1A       | Module 2 | SORBS2    | Module 3 | SERPING1  | Module 4 |           | Module 5 | RPS4X    |
| Module 1 | SELENOK     | Module 2 | CYP4V2    | Module 3 | GLYATL1   | Module 4 |           | Module 5 | RPL36A   |
| Module 1 | ARHGEF3     | Module 2 | KLKB1     | Module 3 | TKFC      | Module 4 |           | Module 5 | SLC25A5  |
| Module 1 | TMF1        | Module 2 | FAT1      | Module 3 | TMEM179B  | Module 4 |           | Module 5 | RPL39    |
| Module 1 | ARL6IP5     | Module 2 | SDHA      | Module 3 | PC        | Module 4 |           | Module 5 | MCTS1    |
| Module 1 | FOXP1       | Module 2 | SLC12A7   | Module 3 | LRP5      | Module 4 |           | Module 5 | NAA10    |
| Module 1 | RYBP        | Module 2 | SRD5A1    | Module 3 | CCND1     | Module 4 |           | Module 5 | RPL10    |
| Module 1 | PPP4R2      | Module 2 | ANKH      | Module 3 | ANO1      | Module 4 |           | Module 5 | LAGE3    |
| Module 1 | CLDND1      | Module 2 | RETREG1   | Module 3 | PDE2A     | Module 4 |           | Module 5 | FUNDC2   |
| Module 1 | NFKBIZ      | Module 2 | MYO10     | Module 3 | NDUFC2    | Module 4 |           | Module 5 | RPS4Y1   |
| Module 1 | CBLB        | Module 2 | UGT3A1    | Module 3 | FZD4      | Module 4 |           |          |          |
| Module 1 | BBX         | Module 2 | SLC1A3    | Module 3 | C11orf54  | Module 4 |           |          |          |
| Module 1 | CD47        | Module 2 | C9        | Module 3 | RDY       | Module 4 |           |          |          |
| Module 1 | CD96        | Module 2 | DAB2      | Module 3 | CADM1     | Module 4 |           |          |          |
| Module 1 | ATG3        | Module 2 | C6        | Module 3 | APOC3     | Module 4 |           |          |          |
| Module 1 | NAA50       | Module 2 | GHR       | Module 3 | APOA1     | Module 4 |           |          |          |

|          |         |          |          |          |            |
|----------|---------|----------|----------|----------|------------|
| Module 1 | TIGIT   | Module 2 | NNT      | Module 3 | FXYD6      |
| Module 1 | HCLS1   | Module 2 | ITGA1    | Module 3 | OAF        |
| Module 1 | GOLGB1  | Module 2 | FST      | Module 3 | ARHGEF12   |
| Module 1 | PARP14  | Module 2 | ARL15    | Module 3 | ESAM       |
| Module 1 | ABTB1   | Module 2 | SNX18    | Module 3 | ROBO4      |
| Module 1 | H1FX    | Module 2 | IL6ST    | Module 3 | AP001783.1 |
| Module 1 | CDV3    | Module 2 | MAP3K1   | Module 3 | TSPAN9     |
| Module 1 | ZBTB38  | Module 2 | PLK2     | Module 3 | VWF        |
| Module 1 | RASA2   | Module 2 | ZSWIM6   | Module 3 | LTBR       |
| Module 1 | RNF7    | Module 2 | IPO11    | Module 3 | C1S        |
| Module 1 | ATP1B3  | Module 2 | MAST4    | Module 3 | C1R        |
| Module 1 | TFDP2   | Module 2 | MRPS36   | Module 3 | RBP5       |
| Module 1 | XRN1    | Module 2 | OCLN     | Module 3 | EMP1       |
| Module 1 | U2SURP  | Module 2 | NAIP     | Module 3 | MGP        |
| Module 1 | GYG1    | Module 2 | MCCC2    | Module 3 | SLCO1B1    |
| Module 1 | TSC22D2 | Module 2 | BHMT     | Module 3 | ETFRF1     |
| Module 1 | SERP1   | Module 2 | TENT2    | Module 3 | PPFBP1     |
| Module 1 | SIAH2   | Module 2 | SERINC5  | Module 3 | TMTC1      |
| Module 1 | GPR171  | Module 2 | ZFYVE16  | Module 3 | GPD1       |
| Module 1 | MBNL1   | Module 2 | DHFR     | Module 3 | METTL7B    |
| Module 1 | RAP2B   | Module 2 | MEF2C    | Module 3 | ERBB3      |
| Module 1 | DHX36   | Module 2 | ARRDC3   | Module 3 | SPRYD4     |
| Module 1 | TIPARP  | Module 2 | ELL2     | Module 3 | RDH16      |
| Module 1 | CCNL1   | Module 2 | MAN2A1   | Module 3 | PTPRB      |
| Module 1 | SMC4    | Module 2 | AFF4     | Module 3 | NTN4       |
| Module 1 | KPNA4   | Module 2 | C5orf24  | Module 3 | AMDHD1     |
| Module 1 | SKIL    | Module 2 | H2AFY    | Module 3 | LTA4H      |
| Module 1 | TTC14   | Module 2 | SMAD5    | Module 3 | TXNRD1     |
| Module 1 | TRA2B   | Module 2 | EGR1     | Module 3 | NUAK1      |
| Module 1 | EIF4A2  | Module 2 | PFDN1    | Module 3 | CDK2AP1    |
| Module 1 | ACAP2   | Module 2 | HBEGF    | Module 3 | GJB2       |
| Module 1 | PPP1R2  | Module 2 | GNPDA1   | Module 3 | FLT1       |
| Module 1 | TFRC    | Module 2 | RBM27    | Module 3 | LHFPL6     |
| Module 1 | RNF168  | Module 2 | SPINK1   | Module 3 | SLC25A15   |
| Module 1 | PAK2    | Module 2 | ABLIM3   | Module 3 | TSC22D1    |
| Module 1 | SPON2   | Module 2 | AFAP1L1  | Module 3 | TPT1       |
| Module 1 | CTBP1   | Module 2 | CSNK1A1  | Module 3 | CPB2       |
| Module 1 | SLBP    | Module 2 | CSF1R    | Module 3 | PCDH17     |
| Module 1 | MXD4    | Module 2 | CD74     | Module 3 | EDNRB      |
| Module 1 | ADD1    | Module 2 | GM2A     | Module 3 | GPC6       |
| Module 1 | MFSD10  | Module 2 | FAXDC2   | Module 3 | COL4A1     |
| Module 1 | LRPAP1  | Module 2 | CLINT1   | Module 3 | COL4A2     |
| Module 1 | LYAR    | Module 2 | LCP2     | Module 3 | F10        |
| Module 1 | S100P   | Module 2 | ERGIC1   | Module 3 | TMEM255B   |
| Module 1 | WDR1    | Module 2 | CPEB4    | Module 3 | ANG        |
| Module 1 | BOD1L1  | Module 2 | HRH2     | Module 3 | FOXA1      |
| Module 1 | CD38    | Module 2 | HK3      | Module 3 | CLEC14A    |
| Module 1 | FGFBP2  | Module 2 | LMAN2    | Module 3 | FERMT2     |
| Module 1 | MED28   | Module 2 | DBN1     | Module 3 | RHOJ       |
| Module 1 | DHX15   | Module 2 | TMED9    | Module 3 | SLC10A1    |
| Module 1 | ARAP2   | Module 2 | CANX     | Module 3 | ENTPD5     |
| Module 1 | TBC1D1  | Module 2 | LTC4S    | Module 3 | ALDH6A1    |
| Module 1 | KLF3    | Module 2 | RNF130   | Module 3 | GSTZ1      |
| Module 1 | RFC1    | Module 2 | MGAT1    | Module 3 | NDUFB1     |
| Module 1 | RHOH    | Module 2 | HEIH     | Module 3 | IFI27      |
| Module 1 | ATP8A1  | Module 2 | SERPINB6 | Module 3 | SERPINA4   |
| Module 1 | DANCR   | Module 2 | PXDC1    | Module 3 | SERPINA3   |
| Module 1 | TMEM165 | Module 2 | F13A1    | Module 3 | SLC25A47   |
| Module 1 | HOPX    | Module 2 | LY86     | Module 3 | CKB        |
| Module 1 | YTHDC1  | Module 2 | NEDD9    | Module 3 | ATP5MPL    |
| Module 1 | AREG    | Module 2 | HIVEP1   | Module 3 | CRIP2      |
| Module 1 | G3BP2   | Module 2 | PHACTR1  | Module 3 | TJP1       |
| Module 1 | CCNI    | Module 2 | CD83     | Module 3 | MEIS2      |
| Module 1 | CNOT6L  | Module 2 | FAM8A1   | Module 3 | IVD        |

|          |            |          |            |          |          |
|----------|------------|----------|------------|----------|----------|
| Module 1 | RASGEF1B   | Module 2 | RNF144B    | Module 3 | GCHFR    |
| Module 1 | HNRNPD     | Module 2 | SOX4       | Module 3 | SERF2    |
| Module 1 | HNRNPD     | Module 2 | GPLD1      | Module 3 | SLC27A2  |
| Module 1 | PLAC8      | Module 2 | C6orf62    | Module 3 | ONECUT1  |
| Module 1 | PPM1K      | Module 2 | IER3       | Module 3 | C2CD4B   |
| Module 1 | GPRIN3     | Module 2 | LST1       | Module 3 | SPG21    |
| Module 1 | EIF4E      | Module 2 | AIF1       | Module 3 | UACA     |
| Module 1 | H2AFZ      | Module 2 | DDAH2      | Module 3 | ANPEP    |
| Module 1 | NFKB1      | Module 2 | HSPA1A     | Module 3 | NR2F2    |
| Module 1 | UBE2D3     | Module 2 | HSPA1B     | Module 3 | MSRB1    |
| Module 1 | TET2       | Module 2 | NEU1       | Module 3 | EMP2     |
| Module 1 | MCUB       | Module 2 | AGPAT1     | Module 3 | NTAN1    |
| Module 1 | ELF2       | Module 2 | NOTCH4     | Module 3 | GPRC5B   |
| Module 1 | SMARCA5    | Module 2 | HLA-DRA    | Module 3 | GPT2     |
| Module 1 | TMEM154    | Module 2 | HLA-DRB5   | Module 3 | IRX3     |
| Module 1 | HMG2       | Module 2 | HLA-DRB1   | Module 3 | MT1G     |
| Module 1 | SPCS3      | Module 2 | HLA-DQA1   | Module 3 | MT1H     |
| Module 1 | IRF2       | Module 2 | HLA-DMB    | Module 3 | MT1X     |
| Module 1 | CASP3      | Module 2 | HLA-DMA    | Module 3 | CETP     |
| Module 1 | ANKRD37    | Module 2 | HLA-DOA    | Module 3 | CPNE2    |
| Module 1 | LPCAT1     | Module 2 | HLA-DPA1   | Module 3 | GOT2     |
| Module 1 | MED10      | Module 2 | HLA-DPB1   | Module 3 | CDH5     |
| Module 1 | 6-Mar      | Module 2 | RGL2       | Module 3 | CES2     |
| Module 1 | OTULIN     | Module 2 | NUDT3      | Module 3 | GFOD2    |
| Module 1 | BASP1      | Module 2 | KCTD20     | Module 3 | DHODH    |
| Module 1 | GOLPH3     | Module 2 | CDKN1A     | Module 3 | HP       |
| Module 1 | SUB1       | Module 2 | C6orf89    | Module 3 | HPR      |
| Module 1 | DNAJC21    | Module 2 | FGD2       | Module 3 | BCAR1    |
| Module 1 | IL7R       | Module 2 | TREM2      | Module 3 | HSD17B2  |
| Module 1 | NIPBL      | Module 2 | CNPY3      | Module 3 | CDH13    |
| Module 1 | FYB1       | Module 2 | SLC22A7    | Module 3 | HSBP1    |
| Module 1 | PTGER4     | Module 2 | VEGFA      | Module 3 | DOC2B    |
| Module 1 | PRKAA1     | Module 2 | NFKBIE     | Module 3 | MYO1C    |
| Module 1 | AC008875.3 | Module 2 | PLA2G7     | Module 3 | CLUH     |
| Module 1 | EMB        | Module 2 | DST        | Module 3 | GLTPD2   |
| Module 1 | PARP8      | Module 2 | OGFRL1     | Module 3 | ARHGEF15 |
| Module 1 | GZMK       | Module 2 | TMEM30A    | Module 3 | SLC47A1  |
| Module 1 | GZMA       | Module 2 | MYO6       | Module 3 | CCL14    |
| Module 1 | GPBP1      | Module 2 | TENT5A     | Module 3 | CCL23    |
| Module 1 | PDE4D      | Module 2 | UBE2J1     | Module 3 | ARHGAP23 |
| Module 1 | KIF2A      | Module 2 | SEC63      | Module 3 | PCGF2    |
| Module 1 | ERBIN      | Module 2 | FOXO3      | Module 3 | JUP      |
| Module 1 | SREK1      | Module 2 | MARCKS     | Module 3 | CAVIN1   |
| Module 1 | PIK3R1     | Module 2 | CALHM6     | Module 3 | RAMP2    |
| Module 1 | BDP1       | Module 2 | MAN1A1     | Module 3 | G6PC     |
| Module 1 | ENC1       | Module 2 | SERINC1    | Module 3 | DUSP3    |
| Module 1 | IQGAP2     | Module 2 | NCOA7      | Module 3 | ABCC3    |
| Module 1 | F2R        | Module 2 | EPB41L2    | Module 3 | ABCA6    |
| Module 1 | CCNH       | Module 2 | ENPP1      | Module 3 | SOX9     |
| Module 1 | LUCAT1     | Module 2 | STX7       | Module 3 | CASKIN2  |
| Module 1 | CAST       | Module 2 | VNN1       | Module 3 | ACOX1    |
| Module 1 | LNPEP      | Module 2 | VNN3       | Module 3 | FASN     |
| Module 1 | CHD1       | Module 2 | SGK1       | Module 3 | MYOM1    |
| Module 1 | TNFAIP8    | Module 2 | AL355881.1 | Module 3 | PIEZO2   |
| Module 1 | LMNB1      | Module 2 | ALDH8A1    | Module 3 | OSBPL1A  |
| Module 1 | CDC42SE2   | Module 2 | ADGRG6     | Module 3 | CDH2     |
| Module 1 | CSF2       | Module 2 | PHACTR2    | Module 3 | TTR      |
| Module 1 | C5orf56    | Module 2 | SASH1      | Module 3 | ONECUT2  |
| Module 1 | IRF1       | Module 2 | GINM1      | Module 3 | MIR122HG |
| Module 1 | PPP2CA     | Module 2 | SNX9       | Module 3 | SLC66A2  |
| Module 1 | UBE2B      | Module 2 | SOD2       | Module 3 | HSBP1L1  |
| Module 1 | JADE2      | Module 2 | LPA        | Module 3 | FSTL3    |
| Module 1 | DDX46      | Module 2 | QKI        | Module 3 | GNA11    |
| Module 1 | HNRNPA0    | Module 2 | SUN1       | Module 3 | NFIC     |

|          |          |          |           |          |           |
|----------|----------|----------|-----------|----------|-----------|
| Module 1 | FAM53C   | Module 2 | TTYH3     | Module 3 | SEMA6B    |
| Module 1 | ETF1     | Module 2 | FSCN1     | Module 3 | TNFAIP8L1 |
| Module 1 | PAIP2    | Module 2 | RAC1      | Module 3 | INSR      |
| Module 1 | TMEM173  | Module 2 | KDEL2     | Module 3 | ANGPTL8   |
| Module 1 | UBE2D2   | Module 2 | RPA3      | Module 3 | TMEM205   |
| Module 1 | PURA     | Module 2 | TMEM106B  | Module 3 | PGLYRP2   |
| Module 1 | IK       | Module 2 | TSPAN13   | Module 3 | MRPL34    |
| Module 1 | TAF7     | Module 2 | AHR       | Module 3 | PLVAP     |
| Module 1 | DIAPH1   | Module 2 | GNMB      | Module 3 | IFI30     |
| Module 1 | NR3C1    | Module 2 | SNX10     | Module 3 | GDF15     |
| Module 1 | TCERG1   | Module 2 | CPVL      | Module 3 | CEBPA     |
| Module 1 | PPP2R2B  | Module 2 | RALA      | Module 3 | LSR       |
| Module 1 | ANXA6    | Module 2 | INHBA     | Module 3 | COX7A1    |
| Module 1 | CCDC69   | Module 2 | PSMA2     | Module 3 | PPP1R14A  |
| Module 1 | G3BP1    | Module 2 | BLVRA     | Module 3 | PCAT19    |
| Module 1 | LARP1    | Module 2 | OGDH      | Module 3 | CEACAM1   |
| Module 1 | HAVCR2   | Module 2 | ADCY1     | Module 3 | BCAM      |
| Module 1 | CYFIP2   | Module 2 | IGFBP1    | Module 3 | NECTIN2   |
| Module 1 | RNF145   | Module 2 | IGFBP3    | Module 3 | EXOC3L2   |
| Module 1 | PTTG1    | Module 2 | EGFR      | Module 3 | NOVA2     |
| Module 1 | DOCK2    | Module 2 | GUSB      | Module 3 | RASIP1    |
| Module 1 | STK10    | Module 2 | ASL       | Module 3 | FGF21     |
| Module 1 | DUSP1    | Module 2 | MLXIPL    | Module 3 | ASPDH     |
| Module 1 | CREBRF   | Module 2 | GTF2I     | Module 3 | CDC42EP5  |
| Module 1 | GRK6     | Module 2 | HIP1      | Module 3 | A1BG      |
| Module 1 | PRR7     | Module 2 | YWHAG     | Module 3 | ATRN      |
| Module 1 | HNRNPAB  | Module 2 | FGL2      | Module 3 | HSPA12B   |
| Module 1 | HNRNP1   | Module 2 | PTPN12    | Module 3 | MYL9      |
| Module 1 | SERPINB1 | Module 2 | MAGI2-AS3 | Module 3 | LBP       |
| Module 1 | SERPINB9 | Module 2 | CD36      | Module 3 | LINC01370 |
| Module 1 | GFOD1    | Module 2 | CLDN12    | Module 3 | HNF4A     |
| Module 1 | MYLIP    | Module 2 | FZD1      | Module 3 | SNAI1     |
| Module 1 | DEK      | Module 2 | CYP51A1   | Module 3 | TSHZ2     |
| Module 1 | RIPOR2   | Module 2 | PON1      | Module 3 | DOK5      |
| Module 1 | TRIM38   | Module 2 | PKD4      | Module 3 | FAM210B   |
| Module 1 | HIST1H4C | Module 2 | CYP3A5    | Module 3 | SOX18     |
| Module 1 | BTN3A2   | Module 2 | CYP3A7    | Module 3 | MIR99AHG  |
| Module 1 | HLA-F    | Module 2 | AZGP1     | Module 3 | CXADR     |
| Module 1 | HLA-A    | Module 2 | ZKSCAN1   | Module 3 | JAM2      |
| Module 1 | ZNRD1    | Module 2 | LAMTOR4   | Module 3 | ATP5PF    |
| Module 1 | HCG18    | Module 2 | STAG3     | Module 3 | CYYR1     |
| Module 1 | HLA-E    | Module 2 | PILRA     | Module 3 | ADAMTS1   |
| Module 1 | ABCF1    | Module 2 | PCOLCE    | Module 3 | ERG       |
| Module 1 | PPP1R10  | Module 2 | TFR2      | Module 3 | BACE2     |
| Module 1 | PPP1R18  | Module 2 | GNB2      | Module 3 | TFF3      |
| Module 1 | FLOT1    | Module 2 | TRIM56    | Module 3 | CSTB      |
| Module 1 | HLA-C    | Module 2 | CUX1      | Module 3 | CLDN5     |
| Module 1 | HLA-B    | Module 2 | NAMPT     | Module 3 | COMT      |
| Module 1 | TNF      | Module 2 | CCDC71L   | Module 3 | SERPIND1  |
| Module 1 | LTB      | Module 2 | BCAP29    | Module 3 | DDT       |
| Module 1 | NCR3     | Module 2 | LAMB1     | Module 3 | SEC14L2   |
| Module 1 | CLIC1    | Module 2 | THAP5     | Module 3 | TIMP3     |
| Module 1 | SNHG32   | Module 2 | DNAJB9    | Module 3 | TMPRSS6   |
| Module 1 | GPSM3    | Module 2 | DOCK4     | Module 3 | CYP2D6    |
| Module 1 | HLA-DQB1 | Module 2 | CPED1     | Module 3 | SHANK3    |
| Module 1 | TAP2     | Module 2 | AASS      | Module 3 | IL3RA     |
| Module 1 | PSMB8    | Module 2 | NDUFA5    | Module 3 | PRDX4     |
| Module 1 | PSMB9    | Module 2 | UBE2H     | Module 3 | TSPAN7    |
| Module 1 | TAP1     | Module 2 | MKLN1     | Module 3 | DIPK2B    |
| Module 1 | BRD2     | Module 2 | AKR1D1    | Module 3 | SHROOM4   |
| Module 1 | TAPBP    | Module 2 | HIPK2     | Module 3 | AR        |
| Module 1 | PHF1     | Module 2 | TBXAS1    | Module 3 | EFNB1     |
| Module 1 | HMGA1    | Module 2 | TCAF1     | Module 3 | GJB1      |
| Module 1 | DEF6     | Module 2 | GIMAP8    | Module 3 | TSPAN6    |



|          |           |          |            |          |         |
|----------|-----------|----------|------------|----------|---------|
| Module 1 | SRSF3     | Module 2 | GIMAP6     | Module 3 | TCEAL9  |
| Module 1 | TREM1     | Module 2 | PRKAG2     | Module 3 | RNF128  |
| Module 1 | CCND3     | Module 2 | PTPRN2     | Module 3 | PLS3    |
| Module 1 | PHF3      | Module 2 | CLN8       | Module 3 | IL13RA1 |
| Module 1 | SMAP1     | Module 2 | MFHAS1     | Module 3 | LAMP2   |
| Module 1 | PHIP      | Module 2 | PPP1R3B    | Module 3 | MPP1    |
| Module 1 | SYNCRIP   | Module 2 | CTSB       | Module 3 | F8      |
| Module 1 | ZNF292    | Module 2 | MSR1       | Module 3 | MT-ND2  |
| Module 1 | AKIRIN2   | Module 2 | SLC7A2     | Module 3 | UROC1   |
| Module 1 | PNRC1     | Module 2 | ASAH1      | Module 3 | LYPD2   |
| Module 1 | PNISR     | Module 2 | CSGALNACT1 |          |         |
| Module 1 | PRDM1     | Module 2 | ATP6V1B2   |          |         |
| Module 1 | CD164     | Module 2 | SLC39A14   |          |         |
| Module 1 | AMD1      | Module 2 | TNFRSF10B  |          |         |
| Module 1 | GTF3C6    | Module 2 | BNIP3L     |          |         |
| Module 1 | FYN       | Module 2 | DPYSL2     |          |         |
| Module 1 | ARHGAP18  | Module 2 | ZNF703     |          |         |
| Module 1 | SAMD3     | Module 2 | TACC1      |          |         |
| Module 1 | BCLAF1    | Module 2 | PLAT       |          |         |
| Module 1 | IFNGR1    | Module 2 | SMIM19     |          |         |
| Module 1 | TNFAIP3   | Module 2 | HOOK3      |          |         |
| Module 1 | ABRACL    | Module 2 | RB1CC1     |          |         |
| Module 1 | HECA      | Module 2 | LYN        |          |         |
| Module 1 | CITED2    | Module 2 | IMPAD1     |          |         |
| Module 1 | STX11     | Module 2 | YTHDF3     |          |         |
| Module 1 | UTRN      | Module 2 | NCOA2      |          |         |
| Module 1 | PCMT1     | Module 2 | RDH10      |          |         |
| Module 1 | SYNE1     | Module 2 | LY96       |          |         |
| Module 1 | ARID1B    | Module 2 | FABP5      |          |         |
| Module 1 | DYNLT1    | Module 2 | GEM        |          |         |
| Module 1 | SYTL3     | Module 2 | TP53INP1   |          |         |
| Module 1 | EZR       | Module 2 | MTDH       |          |         |
| Module 1 | TAGAP     | Module 2 | KLF10      |          |         |
| Module 1 | WTAP      | Module 2 | BAALC      |          |         |
| Module 1 | IGF2R     | Module 2 | MTSS1      |          |         |
| Module 1 | SFT2D1    | Module 2 | LRATD2     |          |         |
| Module 1 | RNASET2   | Module 2 | ASAP1      |          |         |
| Module 1 | NUDT1     | Module 2 | NRDG1      |          |         |
| Module 1 | CHST12    | Module 2 | ST3GAL1    |          |         |
| Module 1 | LFNG      | Module 2 | PTP4A3     |          |         |
| Module 1 | ACTB      | Module 2 | PLEC       |          |         |
| Module 1 | ARL4A     | Module 2 | DGAT1      |          |         |
| Module 1 | TWISTNB   | Module 2 | GPT        |          |         |
| Module 1 | TRA2A     | Module 2 | KANK1      |          |         |
| Module 1 | CYCS      | Module 2 | SLC1A1     |          |         |
| Module 1 | HNRNPA2B1 | Module 2 | CDC37L1    |          |         |
| Module 1 | SKAP2     | Module 2 | GLDC       |          |         |
| Module 1 | HOTAIRM1  | Module 2 | MPDZ       |          |         |
| Module 1 | TAX1BP1   | Module 2 | NFIB       |          |         |
| Module 1 | KBTBD2    | Module 2 | PLIN2      |          |         |
| Module 1 | HERPUD2   | Module 2 | TEK        |          |         |
| Module 1 | SEPTIN7   | Module 2 | C9orf72    |          |         |
| Module 1 | AOAH      | Module 2 | PGM5       |          |         |
| Module 1 | STARD3NL  | Module 2 | TJP2       |          |         |
| Module 1 | TRGC2     | Module 2 | KLF9       |          |         |
| Module 1 | TRGC1     | Module 2 | GDA        |          |         |
| Module 1 | TRG-AS1   | Module 2 | ZFAND5     |          |         |
| Module 1 | CDK13     | Module 2 | GNAQ       |          |         |
| Module 1 | STK17A    | Module 2 | GOLM1      |          |         |
| Module 1 | DBNL      | Module 2 | DAPK1      |          |         |
| Module 1 | TMED4     | Module 2 | CTSL       |          |         |
| Module 1 | H2AFV     | Module 2 | GADD45G    |          |         |
| Module 1 | MYO1G     | Module 2 | SYK        |          |         |
| Module 1 | UPP1      | Module 2 | CARD19     |          |         |

|          |            |          |             |
|----------|------------|----------|-------------|
| Module 1 | IKZF1      | Module 2 | NINJ1       |
| Module 1 | VOPP1      | Module 2 | FAM120A     |
| Module 1 | CHCHD2     | Module 2 | FBP1        |
| Module 1 | TMEM248    | Module 2 | ALDOB       |
| Module 1 | AUTS2      | Module 2 | ABCA1       |
| Module 1 | BCL7B      | Module 2 | KLF4        |
| Module 1 | LAT2       | Module 2 | TMEM245     |
| Module 1 | NCF1       | Module 2 | PALM2-AKAP2 |
| Module 1 | RSBN1L     | Module 2 | UGCG        |
| Module 1 | TMEM243    | Module 2 | SLC31A2     |
| Module 1 | SRI        | Module 2 | FKBP15      |
| Module 1 | AKAP9      | Module 2 | SLC31A1     |
| Module 1 | FAM133B    | Module 2 | ORM1        |
| Module 1 | CDK6       | Module 2 | ORM2        |
| Module 1 | SAMD9      | Module 2 | TLR4        |
| Module 1 | SAMD9L     | Module 2 | C5          |
| Module 1 | ARPC1B     | Module 2 | STOM        |
| Module 1 | TSC22D4    | Module 2 | HSPA5       |
| Module 1 | POLR2J3    | Module 2 | SLC25A25    |
| Module 1 | KMT2E      | Module 2 | LRRC8A      |
| Module 1 | SRPK2      | Module 2 | IER5L       |
| Module 1 | PIK3CG     | Module 2 | LINC00963   |
| Module 1 | PNPLA8     | Module 2 | PTGES       |
| Module 1 | IFRD1      | Module 2 | NUP214      |
| Module 1 | TES        | Module 2 | SLC2A6      |
| Module 1 | LSM8       | Module 2 | RXRA        |
| Module 1 | ATP6V1F    | Module 2 | FCN1        |
| Module 1 | AC016831.5 | Module 2 | AGPAT2      |
| Module 1 | LINC-PINT  | Module 2 | NRARP       |
| Module 1 | AKR1B1     | Module 2 | KLF6        |
| Module 1 | MTPN       | Module 2 | DHTKD1      |
| Module 1 | ZC3HAV1    | Module 2 | FRMD4A      |
| Module 1 | BRAF       | Module 2 | MRC1        |
| Module 1 | TRBC1      | Module 2 | NSUN6       |
| Module 1 | TRBC2      | Module 2 | PLXDC2      |
| Module 1 | ZYX        | Module 2 | OTUD1       |
| Module 1 | GIMAP7     | Module 2 | ZEB1        |
| Module 1 | GIMAP4     | Module 2 | ITGB1       |
| Module 1 | GIMAP1     | Module 2 | NRP1        |
| Module 1 | GIMAP5     | Module 2 | CXCL12      |
| Module 1 | KMT2C      | Module 2 | RASSF4      |
| Module 1 | DNAJB6     | Module 2 | ALOX5       |
| Module 1 | ERICH1     | Module 2 | NCOA4       |
| Module 1 | MYOM2      | Module 2 | OGDHL       |
| Module 1 | PCM1       | Module 2 | JMJD1C      |
| Module 1 | DOK2       | Module 2 | REEP3       |
| Module 1 | PDLIM2     | Module 2 | PSAP        |
| Module 1 | SLC25A37   | Module 2 | P4HA1       |
| Module 1 | PPP2R2A    | Module 2 | PLAU        |
| Module 1 | HMBOX1     | Module 2 | KCNMA1      |
| Module 1 | DUSP4      | Module 2 | ZMIZ1       |
| Module 1 | SARAF      | Module 2 | PPIF        |
| Module 1 | LEPROTL1   | Module 2 | PLAC9       |
| Module 1 | RAB11FIP1  | Module 2 | TSPAN14     |
| Module 1 | NSD3       | Module 2 | PAPSS2      |
| Module 1 | PLEKHA2    | Module 2 | PTEN        |
| Module 1 | IDO1       | Module 2 | LIPA        |
| Module 1 | PRKDC      | Module 2 | PPP1R3C     |
| Module 1 | PCMTD1     | Module 2 | CPEB3       |
| Module 1 | SDCBP      | Module 2 | MYOF        |
| Module 1 | TOX        | Module 2 | CYP2C8      |
| Module 1 | PDE7A      | Module 2 | ENTPD1      |
| Module 1 | MYBL1      | Module 2 | PIK3AP1     |
| Module 1 | TERF1      | Module 2 | RRP12       |

|          |          |          |            |
|----------|----------|----------|------------|
| Module 1 | PAG1     | Module 2 | AVPI1      |
| Module 1 | RIPK2    | Module 2 | ERLIN1     |
| Module 1 | NBN      | Module 2 | NOLC1      |
| Module 1 | RNF19A   | Module 2 | WBP1L      |
| Module 1 | YWHAZ    | Module 2 | GPAM       |
| Module 1 | OXR1     | Module 2 | ACSL5      |
| Module 1 | RAD21    | Module 2 | TCF7L2     |
| Module 1 | RNF139   | Module 2 | HABP2      |
| Module 1 | FAM49B   | Module 2 | EIF3A      |
| Module 1 | PHF20L1  | Module 2 | BAG3       |
| Module 1 | SLA      | Module 2 | CHST15     |
| Module 1 | AGO2     | Module 2 | OAT        |
| Module 1 | LY6E     | Module 2 | CTBP2      |
| Module 1 | DOCK8    | Module 2 | TSPAN4     |
| Module 1 | SMARCA2  | Module 2 | AP2A2      |
| Module 1 | PSIP1    | Module 2 | IFITM10    |
| Module 1 | HACD4    | Module 2 | CTSD       |
| Module 1 | TOPORS   | Module 2 | TNNI2      |
| Module 1 | DNAJA1   | Module 2 | CD81       |
| Module 1 | B4GALT1  | Module 2 | CDKN1C     |
| Module 1 | BAG1     | Module 2 | PHLDA2     |
| Module 1 | UBE2R2   | Module 2 | TPP1       |
| Module 1 | DCTN3    | Module 2 | RPL27A     |
| Module 1 | CCDC107  | Module 2 | IPO7       |
| Module 1 | TLN1     | Module 2 | RNF141     |
| Module 1 | GLIPR2   | Module 2 | LYVE1      |
| Module 1 | CEMIP2   | Module 2 | PIK3C2A    |
| Module 1 | ANXA1    | Module 2 | SAA4       |
| Module 1 | OSTF1    | Module 2 | SAA2       |
| Module 1 | TLE4     | Module 2 | SAA1       |
| Module 1 | HNRNPK   | Module 2 | LGR4       |
| Module 1 | ISCA1    | Module 2 | LIN7C      |
| Module 1 | TUT7     | Module 2 | LMO2       |
| Module 1 | CKS2     | Module 2 | TRIM44     |
| Module 1 | SEMA4D   | Module 2 | HSD17B12   |
| Module 1 | NFIL3    | Module 2 | TP53I11    |
| Module 1 | ANP32B   | Module 2 | SPI1       |
| Module 1 | TGFBR1   | Module 2 | AC090559.1 |
| Module 1 | NR4A3    | Module 2 | CELF1      |
| Module 1 | ERP44    | Module 2 | SLC43A3    |
| Module 1 | PTBP3    | Module 2 | CTNND1     |
| Module 1 | POLE3    | Module 2 | MPEG1      |
| Module 1 | RGS3     | Module 2 | OSBP       |
| Module 1 | AKNA     | Module 2 | MS4A6A     |
| Module 1 | ATP6V1G1 | Module 2 | MS4A4A     |
| Module 1 | TRAF1    | Module 2 | MS4A7      |
| Module 1 | RAB14    | Module 2 | SLC15A3    |
| Module 1 | ARPC5L   | Module 2 | DDB1       |
| Module 1 | ZBTB43   | Module 2 | GANAB      |
| Module 1 | SPTAN1   | Module 2 | CDC42EP2   |
| Module 1 | SET      | Module 2 | NEAT1      |
| Module 1 | C9orf78  | Module 2 | EHBP1L1    |
| Module 1 | FNBP1    | Module 2 | MAP3K11    |
| Module 1 | RAPGEF1  | Module 2 | UNC93B1    |
| Module 1 | RALGDS   | Module 2 | CPT1A      |
| Module 1 | SURF4    | Module 2 | DHCR7      |
| Module 1 | UBAC1    | Module 2 | FOLR2      |
| Module 1 | SNHG7    | Module 2 | ARAP1      |
| Module 1 | PTGDS    | Module 2 | SLCO2B1    |
| Module 1 | PAXX     | Module 2 | ARRB1      |
| Module 1 | CLIC3    | Module 2 | SERPINH1   |
| Module 1 | DPP7     | Module 2 | DGAT2      |
| Module 1 | SSNA1    | Module 2 | LRRC32     |
| Module 1 | TUBB4B   | Module 2 | ACER3      |

|          |            |          |          |
|----------|------------|----------|----------|
| Module 1 | ARRDC1     | Module 2 | PAK1     |
| Module 1 | RBM17      | Module 2 | PRCP     |
| Module 1 | PFKFB3     | Module 2 | PICALM   |
| Module 1 | PRKCCQ-AS1 | Module 2 | SMCO4    |
| Module 1 | SFMBT2     | Module 2 | TMEM123  |
| Module 1 | GATA3      | Module 2 | PDGFD    |
| Module 1 | CELF2      | Module 2 | FDX1     |
| Module 1 | UPF2       | Module 2 | PPP2R1B  |
| Module 1 | CAMK1D     | Module 2 | IL18     |
| Module 1 | OPTN       | Module 2 | BCO2     |
| Module 1 | FAM107B    | Module 2 | PTS      |
| Module 1 | RSU1       | Module 2 | NNMT     |
| Module 1 | VIM        | Module 2 | APOA5    |
| Module 1 | ARL5B      | Module 2 | SIDT2    |
| Module 1 | DNAJC1     | Module 2 | TTC36    |
| Module 1 | PIP4K2A    | Module 2 | SLC37A4  |
| Module 1 | APBB1IP    | Module 2 | MCAM     |
| Module 1 | ABI1       | Module 2 | SC5D     |
| Module 1 | YME1L1     | Module 2 | NRGN     |
| Module 1 | WAC        | Module 2 | KCNJ5    |
| Module 1 | MAP3K8     | Module 2 | APLP2    |
| Module 1 | KIF5B      | Module 2 | CD9      |
| Module 1 | EPC1       | Module 2 | TNFRSF1A |
| Module 1 | CREM       | Module 2 | PTMS     |
| Module 1 | CSGALNACT2 | Module 2 | CD4      |
| Module 1 | HNRNPF     | Module 2 | ATN1     |
| Module 1 | UBE2D1     | Module 2 | C1RL     |
| Module 1 | ARID5B     | Module 2 | CD163    |
| Module 1 | EGR2       | Module 2 | C3AR1    |
| Module 1 | NRBF2      | Module 2 | CLEC4A   |
| Module 1 | HNRNPH3    | Module 2 | A2M      |
| Module 1 | DDX21      | Module 2 | CLEC12A  |
| Module 1 | SRGN       | Module 2 | CLEC7A   |
| Module 1 | VPS26A     | Module 2 | OLR1     |
| Module 1 | HK1        | Module 2 | YBX3     |
| Module 1 | SAR1A      | Module 2 | ETV6     |
| Module 1 | PRF1       | Module 2 | LRP6     |
| Module 1 | VSIR       | Module 2 | CREBL2   |
| Module 1 | SPOCK2     | Module 2 | EPS8     |
| Module 1 | ANAPC16    | Module 2 | BCAT1    |
| Module 1 | DDIT4      | Module 2 | ITPR2    |
| Module 1 | KAT6B      | Module 2 | FGD4     |
| Module 1 | NUTM2B-AS1 | Module 2 | KIF21A   |
| Module 1 | ANXA11     | Module 2 | ANO6     |
| Module 1 | CCSER2     | Module 2 | SLC38A4  |
| Module 1 | NUTM2A-AS1 | Module 2 | RAPGEF3  |
| Module 1 | TM9SF3     | Module 2 | HDAC7    |
| Module 1 | HPS1       | Module 2 | RND1     |
| Module 1 | OGA        | Module 2 | TMBIM6   |
| Module 1 | NFKB2      | Module 2 | LARP4    |
| Module 1 | TRIM8      | Module 2 | METTL7A  |
| Module 1 | SLK        | Module 2 | ACVRL1   |
| Module 1 | ITPRIP     | Module 2 | GRASP    |
| Module 1 | ADD3       | Module 2 | NR4A1    |
| Module 1 | DUSP5      | Module 2 | TNS2     |
| Module 1 | SMC3       | Module 2 | CSAD     |
| Module 1 | PDCD4      | Module 2 | PCBP2    |
| Module 1 | CCDC186    | Module 2 | ZNF385A  |
| Module 1 | PDZD8      | Module 2 | CD63     |
| Module 1 | CACUL1     | Module 2 | MMP19    |
| Module 1 | RGS10      | Module 2 | APOF     |
| Module 1 | BUB3       | Module 2 | GLS2     |
| Module 1 | PTPRE      | Module 2 | LRP1     |
| Module 1 | ADAM8      | Module 2 | STAC3    |

|          |          |          |          |
|----------|----------|----------|----------|
| Module 1 | IFITM2   | Module 2 | INHBC    |
| Module 1 | IFITM1   | Module 2 | OS9      |
| Module 1 | RNH1     | Module 2 | AVPR1A   |
| Module 1 | IRF7     | Module 2 | GNS      |
| Module 1 | PNPLA2   | Module 2 | TMBIM4   |
| Module 1 | LSP1     | Module 2 | IRAK3    |
| Module 1 | KCNQ1OT1 | Module 2 | SLC35E3  |
| Module 1 | NAP1L4   | Module 2 | MDM2     |
| Module 1 | RHOG     | Module 2 | CPM      |
| Module 1 | HBB      | Module 2 | LYZ      |
| Module 1 | TRIM22   | Module 2 | DUSP6    |
| Module 1 | ILK      | Module 2 | HAL      |
| Module 1 | TMEM9B   | Module 2 | ELK3     |
| Module 1 | EIF4G2   | Module 2 | GAS2L3   |
| Module 1 | PDE3B    | Module 2 | DRAM1    |
| Module 1 | NUCB2    | Module 2 | IGF1     |
| Module 1 | LDHA     | Module 2 | HSP90B1  |
| Module 1 | PRRG4    | Module 2 | SLC41A2  |
| Module 1 | CD44     | Module 2 | WASHC4   |
| Module 1 | DGKZ     | Module 2 | CKAP4    |
| Module 1 | FNBP4    | Module 2 | ATP2A2   |
| Module 1 | PTPRJ    | Module 2 | SH2B3    |
| Module 1 | UBE2L6   | Module 2 | PTPN11   |
| Module 1 | LPXN     | Module 2 | OAS1     |
| Module 1 | TMEM109  | Module 2 | SDS      |
| Module 1 | CD6      | Module 2 | COX6A1   |
| Module 1 | TMEM258  | Module 2 | MLEC     |
| Module 1 | AHNAK    | Module 2 | ACADS    |
| Module 1 | UBXN1    | Module 2 | P2RX7    |
| Module 1 | POLR2G   | Module 2 | P2RX4    |
| Module 1 | SLC3A2   | Module 2 | CAMKK2   |
| Module 1 | PLAAT4   | Module 2 | SCARB1   |
| Module 1 | OTUB1    | Module 2 | SLC46A3  |
| Module 1 | FERMT3   | Module 2 | HSPH1    |
| Module 1 | VEGFB    | Module 2 | DGKH     |
| Module 1 | RASGRP2  | Module 2 | DNAJC15  |
| Module 1 | SF1      | Module 2 | LRCH1    |
| Module 1 | EHD1     | Module 2 | ITM2B    |
| Module 1 | FAU      | Module 2 | RB1      |
| Module 1 | MALAT1   | Module 2 | LPAR6    |
| Module 1 | FAM89B   | Module 2 | FNDC3A   |
| Module 1 | CFL1     | Module 2 | LMO7     |
| Module 1 | CTSW     | Module 2 | KCTD12   |
| Module 1 | FIBP     | Module 2 | DNAJC3   |
| Module 1 | CCDC85B  | Module 2 | MBNL2    |
| Module 1 | DRAP1    | Module 2 | DOCK9    |
| Module 1 | SF3B2    | Module 2 | GPR183   |
| Module 1 | RAB1B    | Module 2 | TM9SF2   |
| Module 1 | RBM4     | Module 2 | EFNB2    |
| Module 1 | KDM2A    | Module 2 | TNFSF13B |
| Module 1 | GRK2     | Module 2 | IRS2     |
| Module 1 | ANKRD13D | Module 2 | RAB20    |
| Module 1 | POLD4    | Module 2 | ANKRD10  |
| Module 1 | PPP1CA   | Module 2 | ARHGEF7  |
| Module 1 | TBC1D10C | Module 2 | ATP11A   |
| Module 1 | CORO1B   | Module 2 | F7       |
| Module 1 | AIP      | Module 2 | LAMP1    |
| Module 1 | CDK2AP2  | Module 2 | GAS6     |
| Module 1 | GSTP1    | Module 2 | RNASE6   |
| Module 1 | TCIRG1   | Module 2 | RNASE1   |
| Module 1 | NUMA1    | Module 2 | NDRG2    |
| Module 1 | RELT     | Module 2 | DAD1     |
| Module 1 | UCP2     | Module 2 | SLC7A7   |
| Module 1 | RSF1     | Module 2 | PABPN1   |

|          |            |          |           |
|----------|------------|----------|-----------|
| Module 1 | PCF11      | Module 2 | DCAF11    |
| Module 1 | PRSS23     | Module 2 | CIDEB     |
| Module 1 | CTSC       | Module 2 | ADCY4     |
| Module 1 | CHORDC1    | Module 2 | ARHGAP5   |
| Module 1 | TAF1D      | Module 2 | NFKBIA    |
| Module 1 | CEP57      | Module 2 | LGALS3    |
| Module 1 | BIRC3      | Module 2 | KTN1      |
| Module 1 | CASP4      | Module 2 | DAAM1     |
| Module 1 | CASP1      | Module 2 | DHRS7     |
| Module 1 | CARD16     | Module 2 | HIF1A     |
| Module 1 | ATM        | Module 2 | RDH11     |
| Module 1 | ZBTB16     | Module 2 | ZFP36L1   |
| Module 1 | PCSK7      | Module 2 | ACTN1     |
| Module 1 | IL10RA     | Module 2 | NUMB      |
| Module 1 | JAML       | Module 2 | NPC2      |
| Module 1 | CD3E       | Module 2 | TMED10    |
| Module 1 | CD3D       | Module 2 | FOS       |
| Module 1 | CD3G       | Module 2 | JDP2      |
| Module 1 | ATP5MG     | Module 2 | SEL1L     |
| Module 1 | KMT2A      | Module 2 | LINC01146 |
| Module 1 | DDX6       | Module 2 | TRIP11    |
| Module 1 | H2AFX      | Module 2 | LGMN      |
| Module 1 | SORL1      | Module 2 | SERPINA10 |
| Module 1 | CRTAM      | Module 2 | SERPINA11 |
| Module 1 | TBRG1      | Module 2 | EML1      |
| Module 1 | SRPRA      | Module 2 | WARS      |
| Module 1 | ETS1       | Module 2 | DYNC1H1   |
| Module 1 | FLI1       | Module 2 | EXOC3L4   |
| Module 1 | KDM5A      | Module 2 | TNFAIP2   |
| Module 1 | WNK1       | Module 2 | KLC1      |
| Module 1 | CCND2      | Module 2 | ASPG      |
| Module 1 | CHD4       | Module 2 | CYFIP1    |
| Module 1 | LAG3       | Module 2 | NOP10     |
| Module 1 | C12orf57   | Module 2 | SPRED1    |
| Module 1 | PTPN6      | Module 2 | EIF2AK4   |
| Module 1 | SLC2A3     | Module 2 | PLCB2     |
| Module 1 | M6PR       | Module 2 | EHD4      |
| Module 1 | KLRG1      | Module 2 | ZNF106    |
| Module 1 | AC092821.3 | Module 2 | SNAP23    |
| Module 1 | KLRB1      | Module 2 | PDIA3     |
| Module 1 | CLEC2D     | Module 2 | CASC4     |
| Module 1 | CD69       | Module 2 | C15orf48  |
| Module 1 | KLRF1      | Module 2 | BLOC1S6   |
| Module 1 | CLEC2B     | Module 2 | EID1      |
| Module 1 | GABARAPL1  | Module 2 | SPPL2A    |
| Module 1 | KLRD1      | Module 2 | DMXL2     |
| Module 1 | KLRK1      | Module 2 | TMOD3     |
| Module 1 | KLRC3      | Module 2 | MAPK6     |
| Module 1 | KLRC2      | Module 2 | CCPG1     |
| Module 1 | KLRC1      | Module 2 | ADAM10    |
| Module 1 | CDKN1B     | Module 2 | ANXA2     |
| Module 1 | ARHGDI8    | Module 2 | LACTB     |
| Module 1 | STRAP      | Module 2 | PPIB      |
| Module 1 | LDHB       | Module 2 | OAZ2      |
| Module 1 | KRAS       | Module 2 | PLEKHO2   |
| Module 1 | FGFR1OP2   | Module 2 | CLPX      |
| Module 1 | RESF1      | Module 2 | RAB11A    |
| Module 1 | SCAF11     | Module 2 | MAP2K1    |
| Module 1 | SLC38A1    | Module 2 | CALML4    |
| Module 1 | SLC38A2    | Module 2 | HEXA      |
| Module 1 | PCED1B-AS1 | Module 2 | NPTN      |
| Module 1 | CCNT1      | Module 2 | C15orf39  |
| Module 1 | FKBP11     | Module 2 | ETFA      |
| Module 1 | ARF3       | Module 2 | TSPAN3    |

|          |            |          |             |
|----------|------------|----------|-------------|
| Module 1 | TUBA1B     | Module 2 | DNAJA4      |
| Module 1 | TUBA1A     | Module 2 | MTHFS       |
| Module 1 | TUBA1C     | Module 2 | MESD        |
| Module 1 | LIMA1      | Module 2 | TLNRD1      |
| Module 1 | DAZAP2     | Module 2 | ABHD2       |
| Module 1 | SMAGP      | Module 2 | IDH2        |
| Module 1 | BIN2       | Module 2 | FURIN       |
| Module 1 | KRT86      | Module 2 | SLCO3A1     |
| Module 1 | ITGB7      | Module 2 | MEF2A       |
| Module 1 | PFDN5      | Module 2 | SELENOS     |
| Module 1 | PRR13      | Module 2 | PCSK6       |
| Module 1 | HNRNPA1    | Module 2 | TMEM204     |
| Module 1 | ITGA5      | Module 2 | NME3        |
| Module 1 | NCKAP1L    | Module 2 | IGFALS      |
| Module 1 | RPL41      | Module 2 | ABAT        |
| Module 1 | MYL6       | Module 2 | CARHSP1     |
| Module 1 | SMARCC2    | Module 2 | SNN         |
| Module 1 | BAZ2A      | Module 2 | SNX29       |
| Module 1 | STAT6      | Module 2 | PDXDC1      |
| Module 1 | ARHGAP9    | Module 2 | ACSM5       |
| Module 1 | CTDSP2     | Module 2 | IGSF6       |
| Module 1 | USP15      | Module 2 | OTOA        |
| Module 1 | RASSF3     | Module 2 | TNRC6A      |
| Module 1 | IFNG       | Module 2 | CLN3        |
| Module 1 | RAP1B      | Module 2 | ZG16        |
| Module 1 | CNOT2      | Module 2 | MAPK3       |
| Module 1 | RAB21      | Module 2 | STX4        |
| Module 1 | GLIPR1     | Module 2 | PYCARD      |
| Module 1 | PHLDA1     | Module 2 | ITGAX       |
| Module 1 | NAP1L1     | Module 2 | VPS35       |
| Module 1 | OSBP18     | Module 2 | LONP2       |
| Module 1 | PPP1R12A   | Module 2 | CNEP1R1     |
| Module 1 | ATP2B1     | Module 2 | LPCAT2      |
| Module 1 | ATP2B1-AS1 | Module 2 | MT2A        |
| Module 1 | BTG1       | Module 2 | MT1E        |
| Module 1 | EEA1       | Module 2 | CX3CL1      |
| Module 1 | UBE2N      | Module 2 | DYNC1LI2    |
| Module 1 | SOCS2      | Module 2 | ATP6V0D1    |
| Module 1 | VEZT       | Module 2 | RIPOR1      |
| Module 1 | TMPO       | Module 2 | LCAT        |
| Module 1 | GNPTAB     | Module 2 | CDH1        |
| Module 1 | C12orf75   | Module 2 | TAT         |
| Module 1 | SELPLG     | Module 2 | ZFHX3       |
| Module 1 | GLTP       | Module 2 | KARS        |
| Module 1 | ARPC3      | Module 2 | MAF         |
| Module 1 | MED13L     | Module 2 | RFLNB       |
| Module 1 | TESC       | Module 2 | CRK         |
| Module 1 | TAOK3      | Module 2 | SLC43A2     |
| Module 1 | PXN        | Module 2 | SCARF1      |
| Module 1 | SRSF9      | Module 2 | MIR22HG     |
| Module 1 | OASL       | Module 2 | AC090617.10 |
| Module 1 | ORAI1      | Module 2 | TAX1BP3     |
| Module 1 | RHOF       | Module 2 | CXCL16      |
| Module 1 | MLXIP      | Module 2 | VMO1        |
| Module 1 | RSRC2      | Module 2 | RNF167      |
| Module 1 | VPS37B     | Module 2 | SCIMP       |
| Module 1 | RILPL2     | Module 2 | XAF1        |
| Module 1 | NCOR2      | Module 2 | CLEC10A     |
| Module 1 | UBC        | Module 2 | TNFSF13     |
| Module 1 | RAN        | Module 2 | CD68        |
| Module 1 | MPHOSPH8   | Module 2 | SHBG        |
| Module 1 | NUP58      | Module 2 | TMEM88      |
| Module 1 | UBL3       | Module 2 | CYB5D1      |
| Module 1 | HMGB1      | Module 2 | MYH10       |

|          |           |          |          |
|----------|-----------|----------|----------|
| Module 1 | ALOX5AP   | Module 2 | GAS7     |
| Module 1 | N4BP2L2   | Module 2 | PMP22    |
| Module 1 | ELF1      | Module 2 | RASD1    |
| Module 1 | RGCC      | Module 2 | MAP2K3   |
| Module 1 | EPST11    | Module 2 | WSB1     |
| Module 1 | ZC3H13    | Module 2 | LGALS9   |
| Module 1 | LCP1      | Module 2 | RAB34    |
| Module 1 | INTS6     | Module 2 | TAOK1    |
| Module 1 | COMMD6    | Module 2 | GIT1     |
| Module 1 | MYCBP2    | Module 2 | NSRP1    |
| Module 1 | GPR18     | Module 2 | ADAP2    |
| Module 1 | ARGLU1    | Module 2 | CCL2     |
| Module 1 | UPF3A     | Module 2 | CCL8     |
| Module 1 | HNRNPC    | Module 2 | AP2B1    |
| Module 1 | TRDC      | Module 2 | CCL3     |
| Module 1 | TRAC      | Module 2 | CCL3L1   |
| Module 1 | LRP10     | Module 2 | ATP6V0A1 |
| Module 1 | PSME1     | Module 2 | VAT1     |
| Module 1 | IRF9      | Module 2 | GRN      |
| Module 1 | CHMP4A    | Module 2 | NPEPPS   |
| Module 1 | GZMH      | Module 2 | PNPO     |
| Module 1 | GZMB      | Module 2 | NFE2L1   |
| Module 1 | SNX6      | Module 2 | UBE2Z    |
| Module 1 | BAZ1A     | Module 2 | PPP1R9B  |
| Module 1 | FAM177A1  | Module 2 | TOB1     |
| Module 1 | RALGAPA1  | Module 2 | SPAG9    |
| Module 1 | PNN       | Module 2 | DGKE     |
| Module 1 | MIA2      | Module 2 | SCPEP1   |
| Module 1 | MIS18BP1  | Module 2 | AKAP1    |
| Module 1 | RPS29     | Module 2 | DYNLL2   |
| Module 1 | RPL36AL   | Module 2 | YPEL2    |
| Module 1 | ARF6      | Module 2 | CLTC     |
| Module 1 | GNG2      | Module 2 | VMP1     |
| Module 1 | PTGER2    | Module 2 | DCAF7    |
| Module 1 | ERO1A     | Module 2 | CCDC47   |
| Module 1 | GCH1      | Module 2 | PECAM1   |
| Module 1 | MAPK11P1L | Module 2 | GNA13    |
| Module 1 | FBXO34    | Module 2 | FAM20A   |
| Module 1 | PCNX4     | Module 2 | ABCA8    |
| Module 1 | PRKCH     | Module 2 | ABCA5    |
| Module 1 | SYNE2     | Module 2 | CD300E   |
| Module 1 | ZBTB1     | Module 2 | CD300LF  |
| Module 1 | SRSF5     | Module 2 | SEC14L1  |
| Module 1 | RBM25     | Module 2 | SYNGR2   |
| Module 1 | PSEN1     | Module 2 | SOCS3    |
| Module 1 | BATF      | Module 2 | TIMP2    |
| Module 1 | IRF2BPL   | Module 2 | LGALS3BP |
| Module 1 | SPTLC2    | Module 2 | GAA      |
| Module 1 | SNW1      | Module 2 | SLC38A10 |
| Module 1 | GPR65     | Module 2 | NPLOC4   |
| Module 1 | FOXN3     | Module 2 | GCGR     |
| Module 1 | CALM1     | Module 2 | MAFG     |
| Module 1 | CCDC88C   | Module 2 | SECTM1   |
| Module 1 | PPP4R3A   | Module 2 | WDR45B   |
| Module 1 | TC2N      | Module 2 | COLEC12  |
| Module 1 | RIN3      | Module 2 | EMILIN2  |
| Module 1 | DDX24     | Module 2 | EPB41L3  |
| Module 1 | IFI27L2   | Module 2 | PTPRM    |
| Module 1 | PAPOLA    | Module 2 | RAB31    |
| Module 1 | BCL11B    | Module 2 | TUBB6    |
| Module 1 | EVL       | Module 2 | AFG3L2   |
| Module 1 | YY1       | Module 2 | RIOK3    |
| Module 1 | PPP2R5C   | Module 2 | PSTPIP2  |
| Module 1 | HSP90AA1  | Module 2 | C18orf32 |



|          |            |          |            |
|----------|------------|----------|------------|
| Module 1 | RCOR1      | Module 2 | TCF4       |
| Module 1 | EIF5       | Module 2 | LMAN1      |
| Module 1 | GPR132     | Module 2 | RNF152     |
| Module 1 | CRIP1      | Module 2 | CNDP1      |
| Module 1 | SNRPN      | Module 2 | PARD6G-AS1 |
| Module 1 | NSMCE3     | Module 2 | CFD        |
| Module 1 | KLF13      | Module 2 | GADD45B    |
| Module 1 | RASGRP1    | Module 2 | THOP1      |
| Module 1 | SRP14      | Module 2 | GNA15      |
| Module 1 | RTF1       | Module 2 | MFSD12     |
| Module 1 | CCNDBP1    | Module 2 | CREB3L3    |
| Module 1 | B2M        | Module 2 | EBI3       |
| Module 1 | LYSMD2     | Module 2 | PLIN5      |
| Module 1 | RAB27A     | Module 2 | LRG1       |
| Module 1 | SLTM       | Module 2 | MYDGF      |
| Module 1 | BNIP2      | Module 2 | KHSRP      |
| Module 1 | RORA       | Module 2 | C3         |
| Module 1 | VPS13C     | Module 2 | AC008760.2 |
| Module 1 | RAB8B      | Module 2 | ADGRE1     |
| Module 1 | USP3       | Module 2 | MCOLN1     |
| Module 1 | PDCD7      | Module 2 | PNPLA6     |
| Module 1 | ANP32A     | Module 2 | STXBP2     |
| Module 1 | TLE3       | Module 2 | CD209      |
| Module 1 | PKM        | Module 2 | CD320      |
| Module 1 | ADPGK      | Module 2 | KANK3      |
| Module 1 | PML        | Module 2 | ANGPTL4    |
| Module 1 | CSK        | Module 2 | PRAM1      |
| Module 1 | SCAMP2     | Module 2 | ICAM1      |
| Module 1 | UBE2Q2     | Module 2 | C19orf38   |
| Module 1 | PSTPIP1    | Module 2 | LDLR       |
| Module 1 | MORF4L1    | Module 2 | PRKCSH     |
| Module 1 | AC015871.7 | Module 2 | ACP5       |
| Module 1 | BCL2A1     | Module 2 | MAN2B1     |
| Module 1 | IL16       | Module 2 | CALR       |
| Module 1 | AKAP13     | Module 2 | LYL1       |
| Module 1 | ISG20      | Module 2 | TRMT1      |
| Module 1 | CIB1       | Module 2 | PRKACA     |
| Module 1 | IQGAP1     | Module 2 | ADGRE2     |
| Module 1 | LINC01578  | Module 2 | CYP4F3     |
| Module 1 | CHD2       | Module 2 | CYP4F2     |
| Module 1 | HBA2       | Module 2 | BST2       |
| Module 1 | HBA1       | Module 2 | COLGALT1   |
| Module 1 | UBE2I      | Module 2 | LRRC25     |
| Module 1 | SPSB3      | Module 2 | HOMER3     |
| Module 1 | SNHG9      | Module 2 | KIAA0355   |
| Module 1 | RNPS1      | Module 2 | GRAMD1A    |
| Module 1 | ATP6V0C    | Module 2 | USF2       |
| Module 1 | SRRM2      | Module 2 | HAMP       |
| Module 1 | UBN1       | Module 2 | FFAR2      |
| Module 1 | SOCS1      | Module 2 | TYROBP     |
| Module 1 | LITAF      | Module 2 | FCGBP      |
| Module 1 | GSPT1      | Module 2 | PLD3       |
| Module 1 | ARL6IP1    | Module 2 | CYP2A6     |
| Module 1 | PRKCB      | Module 2 | CYP2B6     |
| Module 1 | RBBP6      | Module 2 | AXL        |
| Module 1 | IL4R       | Module 2 | POU2F2     |
| Module 1 | GTFC3C1    | Module 2 | PLAUR      |
| Module 1 | APOBR      | Module 2 | FOSB       |
| Module 1 | LAT        | Module 2 | PPM1N      |
| Module 1 | SPN        | Module 2 | CALM3      |
| Module 1 | MAZ        | Module 2 | AP2S1      |
| Module 1 | MVP        | Module 2 | C5AR1      |
| Module 1 | YPEL3      | Module 2 | FCGRT      |
| Module 1 | CORO1A     | Module 2 | RCN3       |

|          |          |          |           |
|----------|----------|----------|-----------|
| Module 1 | SEPTIN1  | Module 2 | RRAS      |
| Module 1 | ITGAL    | Module 2 | AP2A1     |
| Module 1 | FUS      | Module 2 | ATF5      |
| Module 1 | ZNF267   | Module 2 | CD33      |
| Module 1 | N4BP1    | Module 2 | SIGLEC10  |
| Module 1 | TENT4B   | Module 2 | FPR2      |
| Module 1 | CYLD     | Module 2 | FPR3      |
| Module 1 | CHD9     | Module 2 | OSCAR     |
| Module 1 | RBL2     | Module 2 | LILRB3    |
| Module 1 | HERPUD1  | Module 2 | LILRB5    |
| Module 1 | NLRC5    | Module 2 | LILRB2    |
| Module 1 | ADGRG1   | Module 2 | LILRA5    |
| Module 1 | CNOT1    | Module 2 | LAIR1     |
| Module 1 | CKLF     | Module 2 | LENG8     |
| Module 1 | CMTM2    | Module 2 | LILRA2    |
| Module 1 | CMTM3    | Module 2 | LILRA1    |
| Module 1 | PSMB10   | Module 2 | LILRB1    |
| Module 1 | SNTB2    | Module 2 | LILRB4    |
| Module 1 | IST1     | Module 2 | SIRPA     |
| Module 1 | TERF2IP  | Module 2 | C20orf194 |
| Module 1 | CMC2     | Module 2 | SIGLEC1   |
| Module 1 | CMIP     | Module 2 | SLC23A2   |
| Module 1 | COTL1    | Module 2 | BMP2      |
| Module 1 | IRF8     | Module 2 | RRBP1     |
| Module 1 | MAP1LC3B | Module 2 | THBD      |
| Module 1 | CYBA     | Module 2 | CD93      |
| Module 1 | RNF166   | Module 2 | CST3      |
| Module 1 | ANKRD11  | Module 2 | HM13      |
| Module 1 | TCF25    | Module 2 | ID1       |
| Module 1 | PITPNA   | Module 2 | HCK       |
| Module 1 | PRPF8    | Module 2 | NORAD     |
| Module 1 | HIC1     | Module 2 | SAMHD1    |
| Module 1 | PAFAH1B1 | Module 2 | RPN2      |
| Module 1 | ARRB2    | Module 2 | SRC       |
| Module 1 | PFN1     | Module 2 | TGM2      |
| Module 1 | CTDNEP1  | Module 2 | MAFB      |
| Module 1 | ACAP1    | Module 2 | SERINC3   |
| Module 1 | PLSCR3   | Module 2 | SLPI      |
| Module 1 | POLR2A   | Module 2 | SDC4      |
| Module 1 | TNFSF12  | Module 2 | DBNDD2    |
| Module 1 | EIF4A1   | Module 2 | CTSA      |
| Module 1 | TP53     | Module 2 | PLTP      |
| Module 1 | KDM6B    | Module 2 | CD40      |
| Module 1 | CHD3     | Module 2 | SULF2     |
| Module 1 | TRAPPC1  | Module 2 | ZNFX1     |
| Module 1 | PER1     | Module 2 | CEBPB     |
| Module 1 | VAMP2    | Module 2 | SMIM25    |
| Module 1 | NCOR1    | Module 2 | PFDN4     |
| Module 1 | MPRIP    | Module 2 | GNAS      |
| Module 1 | FLII     | Module 2 | CTSZ      |
| Module 1 | UNC119   | Module 2 | ZGPAT     |
| Module 1 | NUFIP2   | Module 2 | LIME1     |
| Module 1 | SSH2     | Module 2 | TPD52L2   |
| Module 1 | EVI2B    | Module 2 | NRIP1     |
| Module 1 | EVI2A    | Module 2 | APP       |
| Module 1 | ZNF207   | Module 2 | BACH1     |
| Module 1 | SLFN5    | Module 2 | IL10RB    |
| Module 1 | CCL5     | Module 2 | IFNAR1    |
| Module 1 | CCL4     | Module 2 | IFNGR2    |
| Module 1 | CCL4L2   | Module 2 | ITSN1     |
| Module 1 | SYNRG    | Module 2 | RCAN1     |
| Module 1 | MLLT6    | Module 2 | RUNX1     |
| Module 1 | CDK12    | Module 2 | ETS2      |
| Module 1 | STARD3   | Module 2 | ABCG1     |

|          |            |          |          |
|----------|------------|----------|----------|
| Module 1 | IKZF3      | Module 2 | AGPAT3   |
| Module 1 | ORMDL3     | Module 2 | PTTG1IP  |
| Module 1 | RARA       | Module 2 | COL18A1  |
| Module 1 | KRT10      | Module 2 | ADA2     |
| Module 1 | EIF1       | Module 2 | BID      |
| Module 1 | STAT3      | Module 2 | PPM1F    |
| Module 1 | IFI35      | Module 2 | GUCD1    |
| Module 1 | HEXIM1     | Module 2 | GRK3     |
| Module 1 | AC008105.3 | Module 2 | XBP1     |
| Module 1 | FMNL1      | Module 2 | AP1B1    |
| Module 1 | KANSL1     | Module 2 | TCN2     |
| Module 1 | KPNB1      | Module 2 | TUG1     |
| Module 1 | TBX21      | Module 2 | SMTN     |
| Module 1 | SKAP1      | Module 2 | YWHAH    |
| Module 1 | ABI3       | Module 2 | HMOX1    |
| Module 1 | SPOP       | Module 2 | APOL1    |
| Module 1 | LUC7L3     | Module 2 | NCF4     |
| Module 1 | MMD        | Module 2 | CYTH4    |
| Module 1 | AC004687.1 | Module 2 | TRIOBP   |
| Module 1 | LIMD2      | Module 2 | MAFF     |
| Module 1 | ICAM2      | Module 2 | CSNK1E   |
| Module 1 | ERN1       | Module 2 | PDGFB    |
| Module 1 | DDX5       | Module 2 | ATF4     |
| Module 1 | PITPNC1    | Module 2 | NAGA     |
| Module 1 | BPTF       | Module 2 | SMDT1    |
| Module 1 | KPNA2      | Module 2 | CYB5R3   |
| Module 1 | CD300A     | Module 2 | KIAA0930 |
| Module 1 | SLC9A3R1   | Module 2 | PPARA    |
| Module 1 | JPT1       | Module 2 | PLXNB2   |
| Module 1 | SLC25A19   | Module 2 | DENND6B  |
| Module 1 | GRB2       | Module 2 | TYMP     |
| Module 1 | TSEN54     | Module 2 | ARSA     |
| Module 1 | LLGL2      | Module 2 | CSF2RA   |
| Module 1 | H3F3B      | Module 2 | ARSD     |
| Module 1 | UBALD2     | Module 2 | AP1S2    |
| Module 1 | RHBDF2     | Module 2 | ACOT9    |
| Module 1 | JMJD6      | Module 2 | SAT1     |
| Module 1 | SRSF2      | Module 2 | GK       |
| Module 1 | SEPTIN9    | Module 2 | CYBB     |
| Module 1 | TMC6       | Module 2 | GPR34    |
| Module 1 | CYTH1      | Module 2 | UBA1     |
| Module 1 | USP36      | Module 2 | TIMP1    |
| Module 1 | EIF4A3     | Module 2 | CFP      |
| Module 1 | RNF213     | Module 2 | EBP      |
| Module 1 | ACTG1      | Module 2 | HSD17B10 |
| Module 1 | ARHGDI1A   | Module 2 | VSIG4    |
| Module 1 | SLC16A3    | Module 2 | NONO     |
| Module 1 | CSNK1D     | Module 2 | SLC16A2  |
| Module 1 | CD7        | Module 2 | COX7B    |
| Module 1 | METRNL     | Module 2 | BTK      |
| Module 1 | SMCHD1     | Module 2 | GLA      |
| Module 1 | LPIN2      | Module 2 | TCEAL8   |
| Module 1 | MYL12A     | Module 2 | BEX3     |
| Module 1 | TGIF1      | Module 2 | SERPINA7 |
| Module 1 | ANKRD12    | Module 2 | XIAP     |
| Module 1 | CHMP1B     | Module 2 | RTL8C    |
| Module 1 | PTPN2      | Module 2 | FHL1     |
| Module 1 | ROCK1      | Module 2 | F9       |
| Module 1 | MAPRE2     | Module 2 | VMA21    |
| Module 1 | SMAD2      | Module 2 | BCAP31   |
| Module 1 | SMAD7      | Module 2 | ATP6AP1  |
| Module 1 | ME2        | Module 2 | MT-ND1   |
| Module 1 | MBD2       | Module 2 | MT-CO1   |
| Module 1 | MALT1      | Module 2 | MT-CO2   |

|          |            |          |         |
|----------|------------|----------|---------|
| Module 1 | PMAIP1     | Module 2 | MT-ATP8 |
| Module 1 | MBP        | Module 2 | MT-ATP6 |
| Module 1 | GZMM       | Module 2 | MT-CO3  |
| Module 1 | BSG        | Module 2 | MT-ND3  |
| Module 1 | PTBP1      | Module 2 | MT-ND4L |
| Module 1 | TMEM259    | Module 2 | MT-ND4  |
| Module 1 | CNN2       | Module 2 | MT-ND5  |
| Module 1 | MIDN       | Module 2 | MT-CYB  |
| Module 1 | CIRBP      | Module 2 | CYP8B1  |
| Module 1 | PWWP3A     | Module 2 | PPP1R17 |
| Module 1 | ABHD17A    | Module 2 | FAM99A  |
| Module 1 | CSNK1G2    | Module 2 | CYP1A2  |
| Module 1 | MKNK2      |          |         |
| Module 1 | MOB3A      |          |         |
| Module 1 | OAZ1       |          |         |
| Module 1 | LSM7       |          |         |
| Module 1 | TLE5       |          |         |
| Module 1 | S1PR4      |          |         |
| Module 1 | MATK       |          |         |
| Module 1 | ZBTB7A     |          |         |
| Module 1 | TMIGD2     |          |         |
| Module 1 | TICAM1     |          |         |
| Module 1 | SAFB       |          |         |
| Module 1 | TNFSF9     |          |         |
| Module 1 | TNFSF14    |          |         |
| Module 1 | VAV1       |          |         |
| Module 1 | MCEMP1     |          |         |
| Module 1 | TRAPPC5    |          |         |
| Module 1 | RAB11B     |          |         |
| Module 1 | HNRNPM     |          |         |
| Module 1 | MYO1F      |          |         |
| Module 1 | UBL5       |          |         |
| Module 1 | SHFL       |          |         |
| Module 1 | DNMT1      |          |         |
| Module 1 | ICAM3      |          |         |
| Module 1 | CDC37      |          |         |
| Module 1 | PDE4A      |          |         |
| Module 1 | S1PR5      |          |         |
| Module 1 | CDKN2D     |          |         |
| Module 1 | SLC44A2    |          |         |
| Module 1 | ILF3-DT    |          |         |
| Module 1 | ILF3       |          |         |
| Module 1 | SMARCA4    |          |         |
| Module 1 | TRIR       |          |         |
| Module 1 | JUNB       |          |         |
| Module 1 | IER2       |          |         |
| Module 1 | AC020916.1 |          |         |
| Module 1 | IL27RA     |          |         |
| Module 1 | ADGRE5     |          |         |
| Module 1 | DDX39A     |          |         |
| Module 1 | PKN1       |          |         |
| Module 1 | DNAJB1     |          |         |
| Module 1 | BRD4       |          |         |
| Module 1 | RASAL3     |          |         |
| Module 1 | TPM4       |          |         |
| Module 1 | HSH2D      |          |         |
| Module 1 | KLF2       |          |         |
| Module 1 | MYO9B      |          |         |
| Module 1 | ARRDC2     |          |         |
| Module 1 | MAST3      |          |         |
| Module 1 | JUND       |          |         |
| Module 1 | SSBP4      |          |         |
| Module 1 | FKBP8      |          |         |
| Module 1 | REX1BD     |          |         |

|          |          |
|----------|----------|
| Module 1 | COPE     |
| Module 1 | CEBPG    |
| Module 1 | FXYD5    |
| Module 1 | IGFLR1   |
| Module 1 | NFKBID   |
| Module 1 | HCST     |
| Module 1 | TBCB     |
| Module 1 | CAPNS1   |
| Module 1 | KCNK6    |
| Module 1 | ACTN4    |
| Module 1 | HNRNPL   |
| Module 1 | SIRT2    |
| Module 1 | NFKBIB   |
| Module 1 | GMFG     |
| Module 1 | PAF1     |
| Module 1 | ZFP36    |
| Module 1 | SERTAD1  |
| Module 1 | SHKBP1   |
| Module 1 | EGLN2    |
| Module 1 | HNRNPUL1 |
| Module 1 | TGFB1    |
| Module 1 | RPS19    |
| Module 1 | ARHGEF1  |
| Module 1 | RABAC1   |
| Module 1 | ERF      |
| Module 1 | BCL3     |
| Module 1 | RELB     |
| Module 1 | ERCC1    |
| Module 1 | VASP     |
| Module 1 | NAPA     |
| Module 1 | NOP53    |
| Module 1 | SELENOW  |
| Module 1 | CARD8    |
| Module 1 | EMP3     |
| Module 1 | PPP1R15A |
| Module 1 | BAX      |
| Module 1 | SNRNP70  |
| Module 1 | CD37     |
| Module 1 | PRMT1    |
| Module 1 | IL41     |
| Module 1 | NUP62    |
| Module 1 | NKG7     |
| Module 1 | FPR1     |
| Module 1 | PPP2R1A  |
| Module 1 | ZNF331   |
| Module 1 | MYADM    |
| Module 1 | RPS9     |
| Module 1 | LAIR2    |
| Module 1 | UBE2S    |
| Module 1 | UBE2M    |
| Module 1 | FAM110A  |
| Module 1 | SIRPB1   |
| Module 1 | SNRPB    |
| Module 1 | PRNP     |
| Module 1 | RASSF2   |
| Module 1 | GPCPD1   |
| Module 1 | PLCB1    |
| Module 1 | SNX5     |
| Module 1 | NXT1     |
| Module 1 | CST7     |
| Module 1 | APMAP    |
| Module 1 | PLAGL2   |
| Module 1 | COMMD7   |
| Module 1 | MAPRE1   |

|          |          |
|----------|----------|
| Module 1 | RALY     |
| Module 1 | EIF2S2   |
| Module 1 | DYNLRB1  |
| Module 1 | MMP24OS  |
| Module 1 | RBM39    |
| Module 1 | PHF20    |
| Module 1 | RAB51F   |
| Module 1 | PPP1R16B |
| Module 1 | TOP1     |
| Module 1 | ADA      |
| Module 1 | YWHAB    |
| Module 1 | STK4     |
| Module 1 | MMP9     |
| Module 1 | NCOA3    |
| Module 1 | PREX1    |
| Module 1 | DDX27    |
| Module 1 | ZFAS1    |
| Module 1 | B4GALT5  |
| Module 1 | RNF114   |
| Module 1 | PTPN1    |
| Module 1 | NFATC2   |
| Module 1 | RBM38    |
| Module 1 | ATP5F1E  |
| Module 1 | PSMA7    |
| Module 1 | OGFR     |
| Module 1 | PPDPF    |
| Module 1 | RGS19    |
| Module 1 | SAMSN1   |
| Module 1 | BTG3     |
| Module 1 | MIR155HG |
| Module 1 | USP16    |
| Module 1 | SON      |
| Module 1 | MRPS6    |
| Module 1 | SLC5A3   |
| Module 1 | TTC3     |
| Module 1 | HMGN1    |
| Module 1 | MX2      |
| Module 1 | TRAPPC10 |
| Module 1 | ITGB2    |
| Module 1 | DIP2A    |
| Module 1 | S100B    |
| Module 1 | PRMT2    |
| Module 1 | MAPK1    |
| Module 1 | ADORA2A  |
| Module 1 | TPST2    |
| Module 1 | MTFP1    |
| Module 1 | SELENOM  |
| Module 1 | APOL6    |
| Module 1 | MYH9     |
| Module 1 | IL2RB    |
| Module 1 | RAC2     |
| Module 1 | LGALS2   |
| Module 1 | GGA1     |
| Module 1 | SH3BP1   |
| Module 1 | LGALS1   |
| Module 1 | DDX17    |
| Module 1 | JOSD1    |
| Module 1 | SUN2     |
| Module 1 | APOBEC3G |
| Module 1 | RPL3     |
| Module 1 | SYNGR1   |
| Module 1 | TNRC6B   |
| Module 1 | RBX1     |
| Module 1 | EP300    |

|          |         |
|----------|---------|
| Module 1 | TOB2    |
| Module 1 | ARFGAP3 |
| Module 1 | TSPO    |
| Module 1 | PARVG   |
| Module 1 | NUP50   |
| Module 1 | PIM3    |
| Module 1 | SLC25A6 |
| Module 1 | AKAP17A |
| Module 1 | CD99    |
| Module 1 | PRKX    |
| Module 1 | TMSB4X  |
| Module 1 | RAB9A   |
| Module 1 | OFD1    |
| Module 1 | SYAP1   |
| Module 1 | SH3KBP1 |
| Module 1 | SMS     |
| Module 1 | EIF2S3  |
| Module 1 | ATP6AP2 |
| Module 1 | DDX3X   |
| Module 1 | CHST7   |
| Module 1 | RBM3    |
| Module 1 | WAS     |
| Module 1 | PLP2    |
| Module 1 | TSPYL2  |
| Module 1 | SMC1A   |
| Module 1 | MAGED2  |
| Module 1 | NBDY    |
| Module 1 | MSN     |
| Module 1 | IGBP1   |
| Module 1 | IL2RG   |
| Module 1 | PBDC1   |
| Module 1 | ATRX    |
| Module 1 | PGK1    |
| Module 1 | ITM2A   |
| Module 1 | SH3BGRL |
| Module 1 | ARMCX3  |
| Module 1 | TSC22D3 |
| Module 1 | SEPTIN6 |
| Module 1 | THOC2   |
| Module 1 | STAG2   |
| Module 1 | SH2D1A  |
| Module 1 | SASH3   |
| Module 1 | IDS     |
| Module 1 | ARHGAP4 |
| Module 1 | MECP2   |
| Module 1 | TKTL1   |
| Module 1 | FLNA    |
| Module 1 | EMD     |
| Module 1 | G6PD    |
| Module 1 | DDX3Y   |
| Module 1 | MT-ND6  |

---

Supplementary Table 6. Differential expression genes and enrichment pathways of macrophages subpopulations of HCC 4 and CIR 4. (related to Figure 5)

**a. M0\_Mac**

| Gene symbol | avg_log2FC  | p_val_adj  | Upregulated group | Description                                         | pvalue     | geneID        | Count |
|-------------|-------------|------------|-------------------|-----------------------------------------------------|------------|---------------|-------|
| MT-ND1      | 0.638075911 | 5.53E-58   | M0_Mac            | Cocaine addiction                                   | 0.00514048 | FOSB/GNAS     | 2     |
| MT-ND2      | 0.63598162  | 1.02E-55   | M0_Mac            | Transcriptional misregulation in cancer             | 0.00819269 | FUS/MAF/NR4A3 | 3     |
| IL32        | 0.636932785 | 3.31E-51   | M0_Mac            | Amphetamine addiction                               | 0.00998948 | FOSB/GNAS     | 2     |
| MALAT1      | 0.729412102 | 3.45E-40   | M0_Mac            | Thyroid hormone synthesis                           | 0.01172375 | ALB/GNAS      | 2     |
| MT-ATP6     | 0.488543863 | 3.06E-38   | M0_Mac            | Dilated cardiomyopathy                              | 0.01874316 | GNAS/LMNA     | 2     |
| MT-ND3      | 0.455221932 | 2.98E-33   | M0_Mac            | Circadian entrainment                               | 0.01911277 | GNAS/PER1     | 2     |
| MT-CO3      | 0.435547047 | 5.80E-32   | M0_Mac            | Aldosterone synthesis and secretion                 | 0.01948548 | GNAS/NR4A2    | 2     |
| MT-ND4      | 0.453489109 | 8.32E-30   | M0_Mac            | Chagas disease                                      | 0.02100709 | GNAS/CCL5     | 2     |
| MT-CO1      | 0.426585506 | 4.58E-28   | M0_Mac            | Parathyroid hormone synthesis, secretion and action | 0.02257727 | GNAS/NR4A2    | 2     |
| MT-CYB      | 0.420153848 | 1.15E-27   | M0_Mac            | Apoptosis                                           | 0.03581479 | LMNA/MCL1     | 2     |
| ZFP36L2     | 0.493480876 | 5.21E-24   | M0_Mac            | Adrenergic signaling in cardiomyocytes              | 0.04281097 | CREM/GNAS     | 2     |
| ALB         | 0.333567985 | 1.14E-21   | M0_Mac            |                                                     |            |               |       |
| ARL4C       | 0.51854184  | 3.47E-21   | M0_Mac            |                                                     |            |               |       |
| CCL5        | 0.466720732 | 6.13E-21   | M0_Mac            |                                                     |            |               |       |
| NKG7        | 0.602495437 | 1.67E-20   | M0_Mac            |                                                     |            |               |       |
| NR4A2       | 0.398062301 | 3.87E-18   | M0_Mac            |                                                     |            |               |       |
| FOSB        | 0.402329213 | 2.37E-17   | M0_Mac            |                                                     |            |               |       |
| MT-ND5      | 0.411850779 | 2.30E-15   | M0_Mac            |                                                     |            |               |       |
| MAF         | 0.375317425 | 1.71E-13   | M0_Mac            |                                                     |            |               |       |
| FUS         | 0.422590595 | 1.02E-12   | M0_Mac            |                                                     |            |               |       |
| SON         | 0.341508686 | 1.75E-10   | M0_Mac            |                                                     |            |               |       |
| CREM        | 0.385405267 | 2.88E-10   | M0_Mac            |                                                     |            |               |       |
| ZNF331      | 0.472376083 | 7.20E-10   | M0_Mac            |                                                     |            |               |       |
| SLC40A1     | 0.299057643 | 2.02E-09   | M0_Mac            |                                                     |            |               |       |
| CST7        | 0.47868897  | 2.53E-09   | M0_Mac            |                                                     |            |               |       |
| NRP2        | 0.38777613  | 3.62E-07   | M0_Mac            |                                                     |            |               |       |
| STAB1       | 0.389679833 | 6.27E-07   | M0_Mac            |                                                     |            |               |       |
| GNAS        | 0.273412678 | 9.51E-07   | M0_Mac            |                                                     |            |               |       |
| USP36       | 0.40446055  | 1.56E-06   | M0_Mac            |                                                     |            |               |       |
| KDM6B       | 0.376709702 | 7.05E-06   | M0_Mac            |                                                     |            |               |       |
| MCL1        | 0.264867791 | 1.18E-05   | M0_Mac            |                                                     |            |               |       |
| NEAT1       | 0.284498215 | 0.00011718 | M0_Mac            |                                                     |            |               |       |
| NR4A3       | 0.310527915 | 0.00021932 | M0_Mac            |                                                     |            |               |       |
| NFKBID      | 0.365816294 | 0.00033955 | M0_Mac            |                                                     |            |               |       |
| LMNA        | 0.359042593 | 0.00106206 | M0_Mac            |                                                     |            |               |       |
| VPS37B      | 0.349096906 | 0.00118094 | M0_Mac            |                                                     |            |               |       |
| PER1        | 0.253347772 | 0.00247559 | M0_Mac            |                                                     |            |               |       |
| ZFHX3       | 0.306837216 | 0.00314689 | M0_Mac            |                                                     |            |               |       |
| PRRC2C      | 0.328719953 | 0.00796343 | M0_Mac            |                                                     |            |               |       |

**b. M1 TAM RNASE1**

| Gene symbol | avg_log2FC  | p_val_adj | Upregulated group | Description                                    | pvalue     | geneID                  | Count |
|-------------|-------------|-----------|-------------------|------------------------------------------------|------------|-------------------------|-------|
| RNASE1      | 2.21439156  | 1.68E-198 | M1_TAM_RNASE1     | Chagas disease                                 | 2.88E-06   | C1QA/C1QB/FOS/GNAS/JUN  | 5     |
| C1QA        | 0.653010234 | 1.27E-50  | M1_TAM_RNASE1     | Amphetamine addiction                          | 1.69E-05   | FOS/FOSB/GNAS/JUN       | 4     |
| GYPC        | 0.752243553 | 6.89E-42  | M1_TAM_RNASE1     | Pertussis                                      | 2.48E-05   | C1QA/C1QB/FOS/JUN       | 4     |
| SELENOP     | 0.641021209 | 1.20E-37  | M1_TAM_RNASE1     | Endocrine resistance                           | 6.75E-05   | FOS/GNAS/IGF1/JUN       | 4     |
| DAB2        | 0.676941385 | 1.37E-33  | M1_TAM_RNASE1     | Coronavirus disease - COVID-19                 | 0.00015337 | C1QA/C1QB/F13A1/FOS/JUN | 5     |
| C1QB        | 0.460244493 | 2.40E-29  | M1_TAM_RNASE1     | Cocaine addiction                              | 0.00018745 | FOSB/GNAS/JUN           | 3     |
| SLC40A1     | 0.60628339  | 4.18E-26  | M1_TAM_RNASE1     | Complement and coagulation cascades            | 0.00095277 | C1QA/C1QB/F13A1         | 3     |
| STAB1       | 0.612662214 | 1.58E-25  | M1_TAM_RNASE1     | Th1 and Th2 cell differentiation               | 0.0011989  | FOS/JUN/MAF             | 3     |
| MT-ND2      | 0.462486434 | 8.46E-23  | M1_TAM_RNASE1     | IL-17 signaling pathway                        | 0.00127592 | FOS/FOSB/JUN            | 3     |
| MT-ND1      | 0.428304375 | 1.46E-21  | M1_TAM_RNASE1     | Growth hormone synthesis, secretion and action | 0.0025117  | FOS/GNAS/IGF1           | 3     |
| FCGRT       | 0.374568403 | 8.11E-18  | M1_TAM_RNASE1     | Osteoclast differentiation                     | 0.00308996 | FOS/FOSB/JUN            | 3     |
| FOSB        | 0.479858015 | 3.45E-17  | M1_TAM_RNASE1     | Relaxin signaling pathway                      | 0.00315885 | FOS/GNAS/JUN            | 3     |
| MAF         | 0.506574662 | 6.72E-17  | M1_TAM_RNASE1     | Estrogen signaling pathway                     | 0.0038219  | FOS/GNAS/JUN            | 3     |
| TPT1        | 0.284798124 | 2.57E-14  | M1_TAM_RNASE1     | Measles                                        | 0.00390043 | FOS/JUN/CD209           | 3     |
| F13A1       | 0.426063166 | 1.82E-13  | M1_TAM_RNASE1     | Breast cancer                                  | 0.00456452 | FOS/IGF1/JUN            | 3     |
| MS4A6A      | 0.372022248 | 3.22E-12  | M1_TAM_RNASE1     | Oxytocin signaling pathway                     | 0.00519893 | FOS/GNAS/JUN            | 3     |
| FOS         | 0.366399409 | 7.17E-12  | M1_TAM_RNASE1     | Cholesterol metabolism                         | 0.00595336 | PLTP/NPC2               | 2     |
| GNAS        | 0.332586331 | 7.51E-12  | M1_TAM_RNASE1     | Ovarian steroidogenesis                        | 0.00618773 | GNAS/IGF1               | 2     |
| LGMN        | 0.361267614 | 6.00E-11  | M1_TAM_RNASE1     | Long-term depression                           | 0.00848309 | GNAS/IGF1               | 2     |



|         |             |            |               |                                                        |            |              |   |
|---------|-------------|------------|---------------|--------------------------------------------------------|------------|--------------|---|
| ZFP36L1 | 0.368521472 | 6.32E-10   | M1_TAM_RNASE1 | Inflammatory bowel disease                             | 0.00989973 | JUN/MAF      | 2 |
| ITM2B   | 0.362507025 | 6.69E-10   | M1_TAM_RNASE1 | Chemical carcinogenesis - receptor activation          | 0.01251518 | FOS/GNAS/JUN | 3 |
| FOLR2   | 0.405844093 | 4.90E-09   | M1_TAM_RNASE1 | Leishmaniasis                                          | 0.0136959  | FOS/JUN      | 2 |
| LYVE1   | 0.320486864 | 3.04E-08   | M1_TAM_RNASE1 | cAMP signaling pathway                                 | 0.01399844 | FOS/GNAS/JUN | 3 |
| NPC2    | 0.280505247 | 6.19E-08   | M1_TAM_RNASE1 | B cell receptor signaling pathway                      | 0.01543722 | FOS/JUN      | 2 |
| IGF1    | 0.305766035 | 3.97E-07   | M1_TAM_RNASE1 | Colorectal cancer                                      | 0.01689568 | FOS/JUN      | 2 |
| EGFL7   | 0.326091491 | 8.60E-07   | M1_TAM_RNASE1 | PD-L1 expression and PD-1 checkpoint pathway in cancer | 0.01802697 | FOS/JUN      | 2 |
| GPR34   | 0.360901875 | 1.93E-06   | M1_TAM_RNASE1 | GnRH signaling pathway                                 | 0.01958441 | GNAS/JUN     | 2 |
| IGFBP4  | 0.310938486 | 3.75E-06   | M1_TAM_RNASE1 | Rheumatoid arthritis                                   | 0.01958441 | FOS/JUN      | 2 |
| PLTP    | 0.425075593 | 4.86E-06   | M1_TAM_RNASE1 | Staphylococcus aureus infection                        | 0.02078871 | C1QA/C1QB    | 2 |
| JUN     | 0.329838888 | 5.87E-05   | M1_TAM_RNASE1 | Dilated cardiomyopathy                                 | 0.02078871 | GNAS/IGF1    | 2 |
| SIGLEC1 | 0.295534982 | 8.44E-05   | M1_TAM_RNASE1 | Circadian entrainment                                  | 0.02119695 | FOS/GNAS     | 2 |
| CD209   | 0.31418113  | 0.00053519 | M1_TAM_RNASE1 | Inflammatory mediator regulation of TRP channels       | 0.02160857 | GNAS/IGF1    | 2 |
|         |             |            |               | Choline metabolism in cancer                           | 0.02160857 | FOS/JUN      | 2 |
|         |             |            |               | Toll-like receptor signaling pathway                   | 0.02414831 | FOS/JUN      | 2 |
|         |             |            |               | C-type lectin receptor signaling pathway               | 0.02414831 | JUN/CD209    | 2 |
|         |             |            |               | T cell receptor signaling pathway                      | 0.02414831 | FOS/JUN      | 2 |
|         |             |            |               | Parathyroid hormone synthesis, secretion and action    | 0.02502119 | FOS/GNAS     | 2 |
|         |             |            |               | Th17 cell differentiation                              | 0.02590699 | FOS/JUN      | 2 |
|         |             |            |               | TNF signaling pathway                                  | 0.02771689 | FOS/JUN      | 2 |
|         |             |            |               | MAPK signaling pathway                                 | 0.02968753 | FOS/IGF1/JUN | 3 |
|         |             |            |               | Lysosome                                               | 0.03750014 | LGMN/NPC2    | 2 |
|         |             |            |               | Dopaminergic synapse                                   | 0.03750014 | FOS/GNAS     | 2 |
|         |             |            |               | Apoptosis                                              | 0.03959679 | FOS/JUN      | 2 |
|         |             |            |               | Systemic lupus erythematosus                           | 0.03959679 | C1QA/C1QB    | 2 |

**c.M1\_TAM\_LGALS3**

**Ident pathways of macrophages subpopulations of HCC 4 and CIR 4. (related to Figure 5)**

| Gene symbol | avg_log2FC  | p_val_adj | Upregulated group | Description                                       | pvalue     | geneID                                                                 | Count |
|-------------|-------------|-----------|-------------------|---------------------------------------------------|------------|------------------------------------------------------------------------|-------|
| FTL         | 0.902893061 | 4.80E-34  | M1_TAM_LGALS3     | Ribosome                                          | 1.63E-07   | RPL7A/RPL8/RPL10/RPL11/RPL19/RPL36AL/RPLP1/RPS3A/RPS7/RPL14            | 10    |
| GAPDH       | 0.794049268 | 3.50E-21  | M1_TAM_LGALS3     | Salmonella infection                              | 1.67E-07   | ACTB/ACTG1/RHOA/MYL6/ARPC3/ARPC1B/TUBA1B/MYL12B                        | 12    |
| FTH1        | 0.576605958 | 2.46E-15  | M1_TAM_LGALS3     | Parkinson disease                                 | 2.65E-06   | ATP5MC3/ATP5PF/COX5B/COX7A2/PSMA7/SOD1/TXN/COX5A/TUBA1B/PARK7/NDUFA13  | 11    |
| CSTB        | 0.873872968 | 9.49E-14  | M1_TAM_LGALS3     | Coronavirus disease - COVID-19                    | 5.53E-06   | RPL7A/RPL8/RPL10/RPL11/RPL19/RPL36AL/RPLP1/RPS3A/RPS7/RPL14            | 10    |
| VIM         | 0.719132504 | 2.21E-13  | M1_TAM_LGALS3     | Tight junction                                    | 2.70E-05   | ACTB/ACTG1/RHOA/MYL6/ARPC3/ARPC1B/TUBA1B/MYL12B                        | 8     |
| S100A11     | 0.744533985 | 2.17E-12  | M1_TAM_LGALS3     | Cholesterol metabolism                            | 2.82E-05   | APOA1/APOA2/APOC1/APOC2/APOC3                                          | 5     |
| LGALS3      | 1.089557275 | 7.28E-12  | M1_TAM_LGALS3     | Thermogenesis                                     | 3.96E-05   | ACTB/ACTG1/ATP5MC3/ATP5PF/COX5B/COX7A2/COX5A/ATP5MF/NDUFA13            | 9     |
| RHOA        | 0.508947878 | 3.02E-10  | M1_TAM_LGALS3     | Oxidative phosphorylation                         | 4.78E-05   | ATP5MC3/ATP5PF/COX5B/COX7A2/COX5A/ATP5MF/NDUFA13                       | 7     |
| APOA1       | 0.404869198 | 1.00E-09  | M1_TAM_LGALS3     | Amyotrophic lateral sclerosis                     | 5.12E-05   | ACTB/ACTG1/ATP5MC3/ATP5PF/COX5B/COX7A2/PSMA7/SOD1/COX5A/TUBA1B/NDUFA13 | 11    |
| SH3BGR1     | 0.605992874 | 1.09E-09  | M1_TAM_LGALS3     | Prion disease                                     | 0.00013913 | ATP5MC3/ATP5PF/COX5B/COX7A2/PSMA7/SOD1/COX5A/TUBA1B/NDUFA13            | 9     |
| NME2        | 0.472591123 | 3.56E-09  | M1_TAM_LGALS3     | Chemical carcinogenesis - reactive oxygen species | 0.00019034 | ATP5MC3/ATP5PF/COX5B/COX7A2/MGST3/SOD1/COX5A/NDUFA13                   | 8     |
| ALB         | 0.707707553 | 6.18E-09  | M1_TAM_LGALS3     | PPAR signaling pathway                            | 0.00020022 | APOA1/APOA2/APOC3/DBI/FABP5                                            | 5     |
| TXN         | 0.434183931 | 2.26E-08  | M1_TAM_LGALS3     | Bacterial invasion of epithelial cells            | 0.00022668 | ACTB/ACTG1/RHOA/ARPC3/ARPC1B                                           | 5     |
| ARPC3       | 0.464921798 | 2.33E-08  | M1_TAM_LGALS3     | Huntington disease                                | 0.00032728 | ATP5MC3/ATP5PF/COX5B/COX7A2/PSMA7/SOD1/COX5A/TUBA1B/NDUFA13            | 9     |
| MYL6        | 0.420174038 | 6.41E-08  | M1_TAM_LGALS3     | Fluid shear stress and atherosclerosis            | 0.00048513 | ACTB/ACTG1/RHOA/MGST3/SUMO2/TXN                                        | 6     |
| FABP5       | 0.962681363 | 1.66E-07  | M1_TAM_LGALS3     | Pathogenic Escherichia coli infection             | 0.00052389 | ACTB/ACTG1/RHOA/GAPDH/ARPC3/ARPC1B/TUBA1B                              | 7     |
| S100A10     | 0.481210624 | 2.03E-07  | M1_TAM_LGALS3     | Diabetic cardiomyopathy                           | 0.00062684 | ATP5MC3/ATP5PF/COX5B/COX7A2/GAPDH/COX5A/NDUFA13                        | 7     |
| LGALS1      | 0.757372374 | 2.12E-07  | M1_TAM_LGALS3     | Alzheimer disease                                 | 0.00166551 | ATP5MC3/ATP5PF/COX5B/COX7A2/GAPDH/PSMA7/COX5A/TUBA1B/NDUFA13           | 9     |
| RPL14       | 0.417631767 | 3.63E-07  | M1_TAM_LGALS3     | Shigellosis                                       | 0.00196802 | ACTB/ACTG1/RHOA/SKP1/ARPC3/ARPC1B/MYL12B                               | 7     |
| APOC1       | 0.57073464  | 5.49E-07  | M1_TAM_LGALS3     | Pathways of neurodegeneration - multiple diseases | 0.00205311 | ATP5MC3/ATP5PF/COX5B/COX7A2/PSMA7/SOD1/COX5A/TUBA1B/PARK7/NDUFA13      | 10    |
| APOC3       | 0.294105808 | 7.48E-07  | M1_TAM_LGALS3     | Yersinia infection                                | 0.00307616 | ACTB/ACTG1/RHOA/ARPC3/ARPC1B                                           | 5     |
| CLIC1       | 0.514840767 | 9.62E-07  | M1_TAM_LGALS3     | Ferroptosis                                       | 0.0032007  | FTH1/FTL/GPX4                                                          | 3     |
| HINT1       | 0.522169609 | 1.10E-06  | M1_TAM_LGALS3     | Regulation of actin cytoskeleton                  | 0.00482975 | ACTB/ACTG1/RHOA/ARPC3/ARPC1B/MYL12B                                    | 6     |
| SERF2       | 0.309602331 | 1.15E-06  | M1_TAM_LGALS3     | Vibrio cholerae infection                         | 0.00561916 | ACTB/ACTG1/SEC61B                                                      | 3     |
| LDHA        | 0.34608263  | 1.54E-06  | M1_TAM_LGALS3     | Leukocyte transendothelial migration              | 0.00929593 | ACTB/ACTG1/RHOA/MYL12B                                                 | 4     |
| PRDX1       | 0.541866984 | 2.41E-06  | M1_TAM_LGALS3     | Protein export                                    | 0.01192553 | SRP14/SEC61B                                                           | 2     |
| PEBP1       | 0.413135731 | 2.49E-06  | M1_TAM_LGALS3     | Platelet activation                               | 0.0123882  | ACTB/ACTG1/RHOA/MYL12B                                                 | 4     |
| ATP5MF      | 0.479891092 | 3.24E-06  | M1_TAM_LGALS3     | Glycolysis / Gluconeogenesis                      | 0.01258982 | ENO1/GAPDH/LDHA                                                        | 3     |
| GUK1        | 0.372060723 | 3.29E-06  | M1_TAM_LGALS3     | Adherens junction                                 | 0.0147174  | ACTB/ACTG1/RHOA                                                        | 3     |
| APOC2       | 0.327752407 | 3.49E-06  | M1_TAM_LGALS3     | Phagosome                                         | 0.02431102 | ACTB/ACTG1/TUBA1B/SEC61B                                               | 4     |
| ARPC1B      | 0.40123025  | 6.29E-06  | M1_TAM_LGALS3     | Cardiac muscle contraction                        | 0.02516048 | COX5B/COX7A2/COX5A                                                     | 3     |

|         |             |            |               |                                   |            |                            |   |
|---------|-------------|------------|---------------|-----------------------------------|------------|----------------------------|---|
| RPL7A   | 0.348506402 | 6.75E-06   | M1_TAM_LGALS3 | Oxytocin signaling pathway        | 0.02535828 | ACTB/ACTG1/RHOA/MYL6       | 4 |
| PARK7   | 0.372717582 | 1.60E-05   | M1_TAM_LGALS3 | Non-alcoholic fatty liver disease | 0.02589203 | COX5B/COX7A2/COX5A/NDUFA13 | 4 |
| YBX1    | 0.384930744 | 1.61E-05   | M1_TAM_LGALS3 | HIF-1 signaling pathway           | 0.04458613 | ENO1/GAPDH/LDHA            | 3 |
| RPLP1   | 0.27227867  | 2.29E-05   | M1_TAM_LGALS3 |                                   |            |                            |   |
| SKP1    | 0.449046693 | 2.50E-05   | M1_TAM_LGALS3 |                                   |            |                            |   |
| TUBA1B  | 0.453900693 | 3.51E-05   | M1_TAM_LGALS3 |                                   |            |                            |   |
| ATP5PF  | 0.402006967 | 3.73E-05   | M1_TAM_LGALS3 |                                   |            |                            |   |
| CHCHD2  | 0.434868163 | 4.20E-05   | M1_TAM_LGALS3 |                                   |            |                            |   |
| MGST3   | 0.479847707 | 4.98E-05   | M1_TAM_LGALS3 |                                   |            |                            |   |
| APOA2   | 0.303518606 | 5.36E-05   | M1_TAM_LGALS3 |                                   |            |                            |   |
| PTGES3  | 0.408322713 | 5.92E-05   | M1_TAM_LGALS3 |                                   |            |                            |   |
| BLVRB   | 0.48334155  | 6.02E-05   | M1_TAM_LGALS3 |                                   |            |                            |   |
| DBI     | 0.498429721 | 7.44E-05   | M1_TAM_LGALS3 |                                   |            |                            |   |
| ACTG1   | 0.450963132 | 7.84E-05   | M1_TAM_LGALS3 |                                   |            |                            |   |
| SNHG29  | 0.397850557 | 8.79E-05   | M1_TAM_LGALS3 |                                   |            |                            |   |
| SUMO2   | 0.395420089 | 0.00011232 | M1_TAM_LGALS3 |                                   |            |                            |   |
| GPX4    | 0.409283295 | 0.00016455 | M1_TAM_LGALS3 |                                   |            |                            |   |
| MIF     | 0.371713556 | 0.00018452 | M1_TAM_LGALS3 |                                   |            |                            |   |
| SRP14   | 0.411887517 | 0.00023838 | M1_TAM_LGALS3 |                                   |            |                            |   |
| RPS7    | 0.318989317 | 0.00024929 | M1_TAM_LGALS3 |                                   |            |                            |   |
| RPL10   | 0.280690801 | 0.00035169 | M1_TAM_LGALS3 |                                   |            |                            |   |
| RAN     | 0.389995969 | 0.00037139 | M1_TAM_LGALS3 |                                   |            |                            |   |
| CAPG    | 0.636037462 | 0.00037989 | M1_TAM_LGALS3 |                                   |            |                            |   |
| COX7A2  | 0.407221227 | 0.00043319 | M1_TAM_LGALS3 |                                   |            |                            |   |
| RPL8    | 0.270571851 | 0.0004674  | M1_TAM_LGALS3 |                                   |            |                            |   |
| COX5B   | 0.432254561 | 0.00049353 | M1_TAM_LGALS3 |                                   |            |                            |   |
| ENO1    | 0.411514222 | 0.00057159 | M1_TAM_LGALS3 |                                   |            |                            |   |
| MYL12B  | 0.497598515 | 0.00070137 | M1_TAM_LGALS3 |                                   |            |                            |   |
| PSMA7   | 0.407218586 | 0.00073789 | M1_TAM_LGALS3 |                                   |            |                            |   |
| NOP10   | 0.47858627  | 0.00088809 | M1_TAM_LGALS3 |                                   |            |                            |   |
| ANXA2   | 0.448882273 | 0.00090491 | M1_TAM_LGALS3 |                                   |            |                            |   |
| ANXA1   | 0.318112471 | 0.0010263  | M1_TAM_LGALS3 |                                   |            |                            |   |
| ATP5MC3 | 0.344957429 | 0.00106182 | M1_TAM_LGALS3 |                                   |            |                            |   |
| SOD1    | 0.383808544 | 0.00111302 | M1_TAM_LGALS3 |                                   |            |                            |   |
| SLC25A3 | 0.377802441 | 0.00153935 | M1_TAM_LGALS3 |                                   |            |                            |   |
| SEC61B  | 0.369661731 | 0.00163088 | M1_TAM_LGALS3 |                                   |            |                            |   |
| RPS3A   | 0.308746297 | 0.00226982 | M1_TAM_LGALS3 |                                   |            |                            |   |
| RPL11   | 0.286303626 | 0.00227543 | M1_TAM_LGALS3 |                                   |            |                            |   |
| ACTB    | 0.429132567 | 0.00250597 | M1_TAM_LGALS3 |                                   |            |                            |   |
| NDUFA13 | 0.290278442 | 0.00406536 | M1_TAM_LGALS3 |                                   |            |                            |   |
| RPL19   | 0.28040366  | 0.00408749 | M1_TAM_LGALS3 |                                   |            |                            |   |
| RPL36AL | 0.361721634 | 0.0066823  | M1_TAM_LGALS3 |                                   |            |                            |   |
| COX5A   | 0.405489872 | 0.00828404 | M1_TAM_LGALS3 |                                   |            |                            |   |

**d.M1\_TAM\_CCL2**

| Gene symbol | avg_log2FC  | p_val_adj | Upregulated group | Description                                                   | pvalue     | geneID                      | Count |
|-------------|-------------|-----------|-------------------|---------------------------------------------------------------|------------|-----------------------------|-------|
| CCL2        | 2.115122951 | 7.01E-139 | M1_TAM_CCL2       | Antigen processing and presentation                           | 0.00013586 | CTSB/HSPA1A/HSPA1B/LGMN     | 4     |
| CCL8        | 0.837824581 | 1.37E-25  | M1_TAM_CCL2       | Lipid and atherosclerosis                                     | 0.00074527 | FOS/HSPA1A/HSPA1B/CCL2/CCL3 | 5     |
| STAB1       | 0.614515586 | 1.73E-15  | M1_TAM_CCL2       | Osteoclast differentiation                                    | 0.00090251 | FCGR2A/FOS/FOSB/LILRB5      | 4     |
| RNASE1      | 0.414864075 | 1.77E-15  | M1_TAM_CCL2       | Measles                                                       | 0.00122274 | FOS/HSPA1A/HSPA1B/CD209     | 4     |
| FCGR2A      | 0.570122218 | 2.55E-13  | M1_TAM_CCL2       | Phagosome                                                     | 0.00170825 | FCGR2A/MRC1/MSR1/CD209      | 4     |
| DAB2        | 0.510025707 | 5.52E-12  | M1_TAM_CCL2       | Rheumatoid arthritis                                          | 0.00388189 | FOS/CCL2/CCL3               | 3     |
| CCL3        | 0.36460469  | 1.88E-11  | M1_TAM_CCL2       | IL-17 signaling pathway                                       | 0.00400064 | FOS/FOSB/CCL2               | 3     |
| KLF6        | 0.664144387 | 3.90E-11  | M1_TAM_CCL2       | Viral protein interaction with cytokine and cytokine receptor | 0.00475988 | CCL2/CCL3/CCL8              | 3     |
| PLAU        | 0.395806999 | 8.61E-11  | M1_TAM_CCL2       | Chagas disease                                                | 0.00503104 | FOS/CCL2/CCL3               | 3     |
| NRP1        | 0.367461817 | 8.19E-09  | M1_TAM_CCL2       | Coronavirus disease - COVID-19                                | 0.00777719 | FCGR2A/FOS/CCL2/NRP1        | 4     |
| MT-ND2      | 0.366448382 | 1.15E-08  | M1_TAM_CCL2       | Endocytosis                                                   | 0.0102069  | DAB2/FOLR2/HSPA1A/HSPA1B    | 4     |
| HSPA1B      | 0.571925666 | 1.69E-08  | M1_TAM_CCL2       | Yersinia infection                                            | 0.01133465 | FCGR2A/FOS/CCL2             | 3     |
| HSPA1A      | 0.533289288 | 2.96E-07  | M1_TAM_CCL2       | Estrogen signaling pathway                                    | 0.01155998 | FOS/HSPA1A/HSPA1B           | 3     |
| SGK1        | 0.489481517 | 4.46E-07  | M1_TAM_CCL2       | Malaria                                                       | 0.01270398 | GYPC/CCL2                   | 2     |
| LGMN        | 0.38251215  | 7.25E-07  | M1_TAM_CCL2       | Legionellosis                                                 | 0.01630771 | HSPA1A/HSPA1B               | 2     |
| RCAN1       | 0.453795753 | 1.90E-06  | M1_TAM_CCL2       | Longevity regulating pathway - multiple species               | 0.01911851 | HSPA1A/HSPA1B               | 2     |
| GYPC        | 0.344376089 | 1.95E-06  | M1_TAM_CCL2       | Amphetamine addiction                                         | 0.02337016 | FOS/FOSB                    | 2     |
| MT-ND1      | 0.317972463 | 2.82E-06  | M1_TAM_CCL2       | Tuberculosis                                                  | 0.02341981 | FCGR2A/MRC1/CD209           | 3     |

|         |             |            |             |                                         |            |                |   |
|---------|-------------|------------|-------------|-----------------------------------------|------------|----------------|---|
| ZFP36L1 | 0.383363646 | 5.72E-06   | M1_TAM_CCL2 | Chemokine signaling pathway             | 0.0276831  | CCL2/CCL3/CCL8 | 3 |
| SLC40A1 | 0.365695765 | 7.51E-06   | M1_TAM_CCL2 | Transcriptional misregulation in cancer | 0.0276831  | RUNX1/MAF/PLAU | 3 |
| FSCN1   | 0.333022091 | 8.43E-06   | M1_TAM_CCL2 | Leishmaniasis                           | 0.02865967 | FCGR2A/FOS     | 2 |
| MAF     | 0.379010914 | 1.22E-05   | M1_TAM_CCL2 | B cell receptor signaling pathway       | 0.03218741 | FOS/LILRB5     | 2 |
| FOS     | 0.512164597 | 4.76E-05   | M1_TAM_CCL2 | Th1 and Th2 cell differentiation        | 0.03972559 | FOS/MAF        | 2 |
| MRC1    | 0.333594162 | 7.35E-05   | M1_TAM_CCL2 | Fc gamma R-mediated phagocytosis        | 0.0437238  | FCGR2A/GSN     | 2 |
| LILRB5  | 0.293209187 | 9.81E-05   | M1_TAM_CCL2 | Toll-like receptor signaling pathway    | 0.04956332 | FOS/CCL3       | 2 |
| GSN     | 0.32830866  | 0.00018699 | M1_TAM_CCL2 |                                         |            |                |   |
| SELENOP | 0.266056765 | 0.00024416 | M1_TAM_CCL2 |                                         |            |                |   |
| RUNX1   | 0.352897239 | 0.00038946 | M1_TAM_CCL2 |                                         |            |                |   |
| FOLR2   | 0.331058706 | 0.00071373 | M1_TAM_CCL2 |                                         |            |                |   |
| ITSN1   | 0.268387991 | 0.00103686 | M1_TAM_CCL2 |                                         |            |                |   |
| FOSB    | 0.29275459  | 0.00121241 | M1_TAM_CCL2 |                                         |            |                |   |
| HOMER3  | 0.257062463 | 0.00161717 | M1_TAM_CCL2 |                                         |            |                |   |
| CTSB    | 0.320252305 | 0.00238742 | M1_TAM_CCL2 |                                         |            |                |   |
| CD209   | 0.298500328 | 0.0034817  | M1_TAM_CCL2 |                                         |            |                |   |
| MSR1    | 0.36526432  | 0.00352663 | M1_TAM_CCL2 |                                         |            |                |   |

**e.M1\_TAM\_CXCL1**

| Gene symbol | avg_log2FC  | p_val_adj | Upregulated group | Description                                                   | pvalue   | geneID                                                                                                        | Count |
|-------------|-------------|-----------|-------------------|---------------------------------------------------------------|----------|---------------------------------------------------------------------------------------------------------------|-------|
| CCL4L2      | 2.056675159 | 0         | M1_TAM_CXCL1      | NF-kappa B signaling pathway                                  | 8.18E-17 | CD14/CXCL1/CXCL2/CXCL3/ICAM1/IL1B/CXCL8/GADD45B/NFKB1/NFKBIA/PLAU/PTGS2/CCL4/TNF/TNFAIP3/CCL4L2               | 16    |
| CCL4        | 1.784516428 | 9.89E-249 | M1_TAM_CXCL1      | Lipid and atherosclerosis                                     | 2.87E-15 | CD14/FOS/CXCL1/CXCL2/CXCL3/HSPA1A/HSPA1B/ICAM1/IL1B/CXCL8/JUN/NFE2L2/NFKB1/NFKBIA/MAP2K3/CCL2/CCL3/CCL3L1/TNF | 19    |
| CCL3        | 1.636508531 | 2.41E-201 | M1_TAM_CXCL1      | TNF signaling pathway                                         | 7.22E-15 | FOS/CXCL1/CXCL2/CXCL3/ICAM1/IL1B/JUN/JUNB/NFKB1/NFKBIA/MAP2K3/PTGS2/C                                         | 15    |
| CCL3L1      | 1.724765644 | 4.13E-178 | M1_TAM_CXCL1      | IL-17 signaling pathway                                       | 1.37E-14 | FOS/FOSB/CXCL1/CXCL2/CXCL3/IL1B/CXCL8/JUN/NFKB1/NFKBIA/PTGS2/CCL2/TNF                                         | 14    |
| CCL2        | 1.367488216 | 1.45E-106 | M1_TAM_CXCL1      | Legionellosis                                                 | 5.96E-13 | CD14/CXCL1/CXCL2/CXCL3/HSPA1A/HSPA1B/IL1B/CXCL8/NFKB1/NFKBIA/TNF                                              | 11    |
| IER3        | 0.811436382 | 2.54E-75  | M1_TAM_CXCL1      | Chagas disease                                                | 1.06E-12 | C1QA/C1QB/C1QC/FOS/IL1B/CXCL8/JUN/NFKB1/NFKBIA/CCL2/CCL3/CCL3L1/TNF                                           | 13    |
| CXCL1       | 1.096817688 | 1.86E-64  | M1_TAM_CXCL1      | Toll-like receptor signaling pathway                          | 1.37E-12 | CD14/FOS/IL1B/CXCL8/JUN/NFKB1/NFKBIA/MAP2K3/CCL3/CCL3L1/CCL4/TNF/CCL4L2                                       | 13    |
| NR4A2       | 0.663189611 | 7.49E-64  | M1_TAM_CXCL1      | Rheumatoid arthritis                                          | 7.38E-12 | FOS/CXCL1/CXCL2/CXCL3/ICAM1/IL1B/CXCL8/JUN/CCL2/CCL3/CCL3L1/TNF                                               | 12    |
| RNASE1      | 0.563635915 | 2.94E-63  | M1_TAM_CXCL1      | Alcoholic liver disease                                       | 7.69E-11 | C1QA/C1QB/C1QC/CD14/CXCL1/CXCL2/CXCL3/IL1B/CXCL8/NFKB1/NFKBIA/MAP2K3/TNF                                      | 13    |
| FOSB        | 0.662250367 | 1.83E-58  | M1_TAM_CXCL1      | Viral protein interaction with cytokine and cytokine receptor | 3.49E-10 | CXCL1/CXCL2/CXCL3/CXCL8/CCL2/CCL3/CCL3L1/CCL4/CCL8/TNF/CCL4L2                                                 | 11    |
| CD83        | 0.548019977 | 1.88E-56  | M1_TAM_CXCL1      | Pertussis                                                     | 3.92E-10 | C1QA/C1QB/C1QC/CD14/FOS/IL1B/CXCL8/JUN/NFKB1/TNF                                                              | 10    |
| SELENOP     | 0.596507348 | 7.33E-56  | M1_TAM_CXCL1      | Chemokine signaling pathway                                   | 3.52E-08 | CXCL1/CXCL2/CXCL3/CXCL8/NFKB1/NFKBIA/CCL2/CCL3/CCL3L1/CCL4/CCL8/CCL4L2                                        | 12    |
| GADD45B     | 0.547456207 | 2.33E-48  | M1_TAM_CXCL1      | Transcriptional misregulation in cancer                       | 3.52E-08 | RUNX1/CD14/ID2/IGF1/CXCL8/MAF/MEF2C/GADD45B/NFKB1/PLAU/NR4A3/NFKBIZ                                           | 12    |
| KLF6        | 0.695667459 | 8.35E-48  | M1_TAM_CXCL1      | Kaposi sarcoma-associated herpesvirus infection               | 3.96E-08 | RCAN1/FOS/CXCL1/CXCL2/CXCL3/ICAM1/CXCL8/JUN/NFKB1/NFKBIA/PTGS2/ZFP36                                          | 12    |
| PLAU        | 0.558795582 | 1.48E-45  | M1_TAM_CXCL1      | Osteoclast differentiation                                    | 6.70E-08 | FCGR2A/FOS/FOSB/IL1B/JUN/JUNB/NFKB1/NFKBIA/TNF/LILRB5                                                         | 10    |
| CXCL8       | 1.068722967 | 4.97E-45  | M1_TAM_CXCL1      | Yersinia infection                                            | 1.28E-07 | FCGR2A/FOS/IL1B/CXCL8/JUN/NFKB1/NFKBIA/MAP2K3/CCL2/TNF                                                        | 10    |
| GEM         | 0.583623258 | 2.14E-43  | M1_TAM_CXCL1      | Fluid shear stress and atherosclerosis                        | 1.47E-07 | FOS/ICAM1/IL1B/JUN/MEF2C/NFE2L2/NFKB1/CCL2/TNF/KLF2                                                           | 10    |
| C1QA        | 0.373328471 | 3.57E-41  | M1_TAM_CXCL1      | Leishmaniasis                                                 | 1.68E-07 | FCGR2A/FOS/IL1B/JUN/NFKB1/NFKBIA/PTGS2/TNF                                                                    | 8     |
| GYPC        | 0.455144399 | 1.20E-38  | M1_TAM_CXCL1      | NOD-like receptor signaling pathway                           | 2.20E-07 | CXCL1/CXCL2/CXCL3/IL1B/CXCL8/JUN/NFKB1/NFKBIA/CCL2/TNF/TNFAIP3                                                | 11    |
| ZFP36L1     | 0.542753921 | 2.37E-38  | M1_TAM_CXCL1      | Coronavirus disease - COVID-19                                | 2.83E-07 | C1QA/C1QB/C1QC/FCGR2A/FOS/IL1B/CXCL8/JUN/NFKB1/NFKBIA/CCL2/TNF                                                | 12    |
| CCL8        | 0.719230466 | 3.03E-37  | M1_TAM_CXCL1      | MAPK signaling pathway                                        | 5.19E-07 | CD14/FOS/NR4A1/HSPA1A/HSPA1B/IGF1/IL1B/JUN/MEF2C/GADD45B/NFKB1/MAP2K3/TNF                                     | 13    |
| C1QB        | 0.319953887 | 2.07E-36  | M1_TAM_CXCL1      | AGE-RAGE signaling pathway in diabetic complications          | 1.28E-06 | EGR1/ICAM1/IL1B/CXCL8/JUN/NFKB1/CCL2/TNF                                                                      | 8     |
| EGR2        | 0.424205253 | 6.15E-36  | M1_TAM_CXCL1      | Epithelial cell signaling in Helicobacter pylori infection    | 1.36E-06 | CXCL1/CXCL2/CXCL3/CXCL8/JUN/NFKB1/NFKBIA                                                                      | 7     |
| TNFAIP3     | 0.718355112 | 5.64E-35  | M1_TAM_CXCL1      | Amoebiasis                                                    | 1.49E-06 | CD14/CXCL1/CXCL2/CXCL3/IL1B/CXCL8/NFKB1/TNF                                                                   | 8     |
| PPP1R15A    | 0.48893024  | 7.97E-35  | M1_TAM_CXCL1      | Human cytomegalovirus infection                               | 1.64E-06 | IL1B/CXCL8/NFKB1/NFKBIA/PTGS2/CCL2/CCL3/CCL3L1/CCL4/TNF/CCL4L2                                                | 11    |
| DAB2        | 0.469951091 | 1.68E-34  | M1_TAM_CXCL1      | Malaria                                                       | 2.76E-06 | GYPC/ICAM1/IL1B/CXCL8/CCL2/TNF                                                                                | 6     |
| PRDM1       | 0.484240273 | 3.89E-33  | M1_TAM_CXCL1      | Cytokine-cytokine receptor interaction                        | 3.62E-06 | CXCL1/CXCL2/CXCL3/IL1B/CXCL8/CCL2/CCL3/CCL3L1/CCL4/CCL8/TNF/CCL4L2                                            | 12    |
| EGR1        | 0.562889964 | 6.18E-33  | M1_TAM_CXCL1      | Apoptosis                                                     | 1.29E-05 | FOS/JUN/LMNA/GADD45B/NFKB1/NFKBIA/PMAP1/TNF                                                                   | 8     |
| ATF3        | 0.557986798 | 1.48E-31  | M1_TAM_CXCL1      | Measles                                                       | 1.51E-05 | FOS/HSPA1A/HSPA1B/IL1B/JUN/NFKB1/NFKBIA/TNFAIP3                                                               | 8     |
| TNF         | 0.467894956 | 1.95E-30  | M1_TAM_CXCL1      | C-type lectin receptor signaling pathway                      | 1.94E-05 | EGR2/IL1B/JUN/NFKB1/NFKBIA/PTGS2/TNF                                                                          | 7     |
| MS4A6A      | 0.404002284 | 1.75E-29  | M1_TAM_CXCL1      | Epstein-Barr virus infection                                  | 3.33E-05 | HES1/ICAM1/JUN/GADD45B/NFKB1/NFKBIA/MAP2K3/TNF/TNFAIP3                                                        | 9     |
| ABL2        | 0.502799849 | 3.53E-29  | M1_TAM_CXCL1      | Hepatitis B                                                   | 4.57E-05 | EGR2/FOS/CXCL8/JUN/NFKB1/NFKBIA/MAP2K3/TNF                                                                    | 8     |
| CYB5D1      | 0.346630841 | 1.02E-28  | M1_TAM_CXCL1      | Influenza A                                                   | 6.70E-05 | DNAJB1/ICAM1/IL1B/CXCL8/NFKB1/NFKBIA/CCL2/TNF                                                                 | 8     |

|            |             |          |              |                                                        |            |                                                 |   |
|------------|-------------|----------|--------------|--------------------------------------------------------|------------|-------------------------------------------------|---|
| NFKBIA     | 0.41098246  | 1.22E-28 | M1_TAM_CXCL1 | Human T-cell leukemia virus 1 infection                | 6.97E-05   | EGR1/EGR2/FOS/ICAM1/JUN/NFKB1/NFKBIA/TNF/ZFP36  | 9 |
| SGK1       | 0.472858861 | 3.57E-28 | M1_TAM_CXCL1 | Antifolate resistance                                  | 9.34E-05   | FOLR2/IL1B/NFKB1/TNF                            | 4 |
| CXCL2      | 0.562080675 | 6.42E-28 | M1_TAM_CXCL1 | Cytosolic DNA-sensing pathway                          | 0.00014922 | IL1B/NFKB1/NFKBIA/CCL4/CCL4L2                   | 5 |
| C1QC       | 0.307112741 | 3.12E-27 | M1_TAM_CXCL1 | Salmonella infection                                   | 0.0001678  | CD14/FOS/IL1B/CXCL8/JUN/NFKB1/NFKBIA/MAP2K3/TNF | 9 |
| LGMN       | 0.336445777 | 2.68E-26 | M1_TAM_CXCL1 | Inflammatory bowel disease                             | 0.00017317 | IL1B/JUN/MAF/NFKB1/TNF                          | 5 |
| MAF        | 0.390010093 | 2.94E-26 | M1_TAM_CXCL1 | Pathogenic Escherichia coli infection                  | 0.00018008 | FCGR2A/FOS/IL1B/CXCL8/JUN/NFKB1/NFKBIA/TNF      | 8 |
| RCAN1      | 0.566871536 | 4.65E-26 | M1_TAM_CXCL1 | Th17 cell differentiation                              | 0.00023004 | RUNX1/FOS/IL1B/JUN/NFKB1/NFKBIA                 | 6 |
| CD74       | 0.30536279  | 8.11E-26 | M1_TAM_CXCL1 | Toxoplasmosis                                          | 0.00028041 | HSPA1A/HSPA1B/NFKB1/NFKBIA/MAP2K3/TNF           | 6 |
| NR4A1      | 0.434406854 | 8.73E-26 | M1_TAM_CXCL1 | Antigen processing and presentation                    | 0.00040804 | CD74/HSPA1A/HSPA1B/LGMN/TNF                     | 5 |
| AL355881.1 | 0.277519691 | 1.34E-25 | M1_TAM_CXCL1 | B cell receptor signaling pathway                      | 0.00051436 | FOS/JUN/NFKB1/NFKBIA/LILRB5                     | 5 |
| CD14       | 0.414431029 | 3.39E-24 | M1_TAM_CXCL1 | Tuberculosis                                           | 0.00060802 | CD14/CD74/FCGR2A/IL1B/MRC1/NFKB1/TNF            | 7 |
| LILRB5     | 0.316074081 | 5.18E-24 | M1_TAM_CXCL1 | Colorectal cancer                                      | 0.00064032 | FOS/JUN/GADD45B/PMAIP1/RALGDS                   | 5 |
| ZFP36      | 0.4007714   | 6.04E-24 | M1_TAM_CXCL1 | PD-L1 expression and PD-1 checkpoint pathway in cancer | 0.000749   | FOS/JUN/NFKB1/NFKBIA/MAP2K3                     | 5 |
| FOS        | 0.679425863 | 1.22E-23 | M1_TAM_CXCL1 | Th1 and Th2 cell differentiation                       | 0.00087094 | FOS/JUN/MAF/NFKB1/NFKBIA                        | 5 |
| SPRED1     | 0.291023055 | 1.66E-23 | M1_TAM_CXCL1 | Staphylococcus aureus infection                        | 0.00105583 | C1QA/C1QB/C1QC/FCGR2A/ICAM1                     | 5 |
| NR4A3      | 0.519740985 | 3.61E-23 | M1_TAM_CXCL1 | T cell receptor signaling pathway                      | 0.00151123 | FOS/JUN/NFKB1/NFKBIA/TNF                        | 5 |
| TPT1       | 0.265519638 | 3.65E-23 | M1_TAM_CXCL1 | Non-alcoholic fatty liver disease                      | 0.00155896 | FOS/IL1B/CXCL8/JUN/NFKB1/TNF                    | 6 |
| IGF1       | 0.283413306 | 1.10E-22 | M1_TAM_CXCL1 | Prion disease                                          | 0.00156739 | C1QA/C1QB/C1QC/EGR1/HSPA1A/HSPA1B/IL1B/TNF      | 8 |
| GPR34      | 0.349104107 | 1.91E-22 | M1_TAM_CXCL1 | RIG-I-like receptor signaling pathway                  | 0.00244888 | CXCL8/NFKB1/NFKBIA/TNF                          | 4 |
| SLC40A1    | 0.298065536 | 1.93E-22 | M1_TAM_CXCL1 | African trypanosomiasis                                | 0.00327961 | ICAM1/IL1B/TNF                                  | 3 |
| IGSF21     | 0.251270234 | 2.59E-21 | M1_TAM_CXCL1 | Chronic myeloid leukemia                               | 0.00330419 | RUNX1/GADD45B/NFKB1/NFKBIA                      | 4 |
| FCGR2A     | 0.349715211 | 3.28E-21 | M1_TAM_CXCL1 | Shigellosis                                            | 0.00375303 | CD14/IL1B/CXCL8/JUN/NFKB1/NFKBIA/TNF            | 7 |
| IL1B       | 0.349366572 | 3.36E-21 | M1_TAM_CXCL1 | Systemic lupus erythematosus                           | 0.00484698 | C1QA/C1QB/C1QC/FCGR2A/TNF                       | 5 |
| STAB1      | 0.296215153 | 4.12E-21 | M1_TAM_CXCL1 | Complement and coagulation cascades                    | 0.00493808 | C1QA/C1QB/C1QC/PLAU                             | 4 |
| NFKBIZ     | 0.37353415  | 1.43E-20 | M1_TAM_CXCL1 | Small cell lung cancer                                 | 0.00653205 | GADD45B/NFKB1/NFKBIA/PTGS2                      | 4 |
| CXCL3      | 0.413627985 | 4.60E-19 | M1_TAM_CXCL1 | Breast cancer                                          | 0.00671671 | FOS/HES1/IGF1/JUN/GADD45B                       | 5 |
| MRC1       | 0.310774033 | 5.86E-19 | M1_TAM_CXCL1 | Cocaine addiction                                      | 0.00725607 | FOSB/JUN/NFKB1                                  | 3 |
| NRP2       | 0.331111591 | 8.87E-19 | M1_TAM_CXCL1 | Human immunodeficiency virus 1 infection               | 0.00731379 | FOS/JUN/NFKB1/NFKBIA/MAP2K3/TNF                 | 6 |
| BHLHE40    | 0.326427271 | 9.62E-19 | M1_TAM_CXCL1 | Prostate cancer                                        | 0.00785904 | IGF1/NFKB1/NFKBIA/PLAU                          | 4 |
| MAFF       | 0.324010426 | 3.57E-18 | M1_TAM_CXCL1 | Oxytocin signaling pathway                             | 0.00814137 | RCAN1/FOS/JUN/MEF2C/PTGS2                       | 5 |
| SLCO2B1    | 0.281224241 | 3.62E-18 | M1_TAM_CXCL1 | Cellular senescence                                    | 0.00858428 | ZFP36L1/CXCL8/GADD45B/NFKB1/MAP2K3              | 5 |
| KDM6B      | 0.399292387 | 9.97E-18 | M1_TAM_CXCL1 | Chemical carcinogenesis - reactive oxygen species      | 0.00927726 | ABL2/FOS/JUN/NFE2L2/NFKB1/NFKBIA                | 6 |
| FRMD4B     | 0.292626343 | 1.35E-17 | M1_TAM_CXCL1 | Parathyroid hormone synthesis, secretion and action    | 0.01067263 | EGR1/FOS/MEF2C/NR4A2                            | 4 |
| NFKBID     | 0.286656564 | 2.64E-17 | M1_TAM_CXCL1 | Protein processing in endoplasmic reticulum            | 0.01245181 | HSPA1A/HSPA1B/DNAJB1/NFE2L2/PPP1R15A            | 5 |
| ITMB2      | 0.296762063 | 2.65E-17 | M1_TAM_CXCL1 | Longevity regulating pathway - multiple species        | 0.01382237 | HSPA1A/HSPA1B/IGF1                              | 3 |
| WWP1       | 0.26201982  | 1.30E-16 | M1_TAM_CXCL1 | Growth hormone synthesis, secretion and action         | 0.01577652 | FOS/IGF1/JUNB/MAP2K3                            | 4 |
| LYVE1      | 0.279910623 | 1.35E-16 | M1_TAM_CXCL1 | Acute myeloid leukemia                                 | 0.0170136  | RUNX1/CD14/NFKB1                                | 3 |
| PNRC1      | 0.271465386 | 3.67E-16 | M1_TAM_CXCL1 | Adipocytokine signaling pathway                        | 0.01839606 | NFKB1/NFKBIA/TNF                                | 3 |
| KLF10      | 0.277627752 | 3.86E-16 | M1_TAM_CXCL1 | Amphetamine addiction                                  | 0.01839606 | FOS/FOSB/JUN                                    | 3 |
| RUNX1      | 0.306634393 | 4.86E-16 | M1_TAM_CXCL1 | Relaxin signaling pathway                              | 0.02059908 | FOS/JUN/NFKB1/NFKBIA                            | 4 |
| ICAM1      | 0.34994722  | 5.66E-16 | M1_TAM_CXCL1 | p53 signaling pathway                                  | 0.0213438  | IGF1/GADD45B/PMAIP1                             | 3 |
| FOLR2      | 0.267637939 | 7.29E-16 | M1_TAM_CXCL1 | FoxO signaling pathway                                 | 0.02166118 | IGF1/GADD45B/SGK1/KLF2                          | 4 |
| AC020916.1 | 0.343446646 | 1.32E-15 | M1_TAM_CXCL1 | Pancreatic cancer                                      | 0.023715   | GADD45B/NFKB1/RALGDS                            | 3 |
| MALAT1     | 0.293647443 | 2.89E-15 | M1_TAM_CXCL1 | Viral carcinogenesis                                   | 0.02478411 | EGR2/JUN/NFKB1/NFKBIA/PMAIP1                    | 5 |
| HSPA1A     | 0.388801507 | 7.04E-15 | M1_TAM_CXCL1 | Estrogen signaling pathway                             | 0.02564113 | FOS/HSPA1A/HSPA1B/JUN                           | 4 |
| CSRNP1     | 0.293866537 | 9.38E-15 | M1_TAM_CXCL1 | Aldosterone-regulated sodium reabsorption              | 0.03616129 | IGF1/SGK1                                       | 2 |
| ARL5B      | 0.329057655 | 2.99E-14 | M1_TAM_CXCL1 | Hypertrophic cardiomyopathy                            | 0.03659395 | IGF1/LMNA/TNF                                   | 3 |
| JUN        | 0.524107626 | 7.53E-14 | M1_TAM_CXCL1 | GnRH signaling pathway                                 | 0.03973836 | EGR1/JUN/MAP2K3                                 | 3 |
| MIR155HG   | 0.301588559 | 1.00E-13 | M1_TAM_CXCL1 | Dilated cardiomyopathy                                 | 0.04301621 | IGF1/LMNA/TNF                                   | 3 |
| HSPA1B     | 0.492753883 | 1.54E-13 | M1_TAM_CXCL1 | Endocrine resistance                                   | 0.04527491 | FOS/IGF1/JUN                                    | 3 |
| JUNB       | 0.297608839 | 3.88E-13 | M1_TAM_CXCL1 | Inflammatory mediator regulation of TRP channels       | 0.04527491 | IGF1/IL1B/MAP2K3                                | 3 |
| MS4A4A     | 0.280189595 | 9.98E-13 | M1_TAM_CXCL1 | Choline metabolism in cancer                           | 0.04527491 | FOS/JUN/RALGDS                                  | 3 |
| OTUD1      | 0.330357289 | 1.19E-12 | M1_TAM_CXCL1 | Graft-versus-host disease                              | 0.04555845 | IL1B/TNF                                        | 2 |
| RALGDS     | 0.294644324 | 2.11E-12 | M1_TAM_CXCL1 | Hematopoietic cell lineage                             | 0.04642612 | CD14/IL1B/TNF                                   | 3 |
| RGS10      | 0.280297511 | 3.36E-12 | M1_TAM_CXCL1 | Type 1 diabetes mellitus                               | 0.04753538 | IL1B/TNF                                        | 2 |
| PMAIP1     | 0.325694885 | 8.15E-12 | M1_TAM_CXCL1 |                                                        |            |                                                 |   |
| PHACTR1    | 0.317716223 | 9.64E-12 | M1_TAM_CXCL1 |                                                        |            |                                                 |   |
| ID2        | 0.312388311 | 1.15E-11 | M1_TAM_CXCL1 |                                                        |            |                                                 |   |
| PTGS2      | 0.294076304 | 1.16E-11 | M1_TAM_CXCL1 |                                                        |            |                                                 |   |
| IER2       | 0.342285808 | 1.27E-11 | M1_TAM_CXCL1 |                                                        |            |                                                 |   |
| DNAJB1     | 0.423273745 | 1.31E-11 | M1_TAM_CXCL1 |                                                        |            |                                                 |   |
| RASGEF1B   | 0.281336314 | 2.88E-11 | M1_TAM_CXCL1 |                                                        |            |                                                 |   |
| CCNL1      | 0.28443493  | 4.92E-11 | M1_TAM_CXCL1 |                                                        |            |                                                 |   |
| MEF2C      | 0.259178668 | 2.84E-10 | M1_TAM_CXCL1 |                                                        |            |                                                 |   |

|        |             |            |              |
|--------|-------------|------------|--------------|
| HEXA   | 0.25832519  | 6.01E-10   | M1_TAM_CXCL1 |
| MAP2K3 | 0.300592207 | 7.27E-10   | M1_TAM_CXCL1 |
| LMNA   | 0.26933423  | 5.80E-08   | M1_TAM_CXCL1 |
| HES1   | 0.281266408 | 7.94E-08   | M1_TAM_CXCL1 |
| NFE2L2 | 0.261637307 | 7.20E-06   | M1_TAM_CXCL1 |
| KLF2   | 0.259623401 | 0.00124816 | M1_TAM_CXCL1 |
| NFKB1  | 0.312817824 | 0.00176193 | M1_TAM_CXCL1 |

**f.M1\_TAM\_LGALS3\_MT1H\_MT1G**

| Gene symbol | avg_log2FC  | p_val_adj | Upregulated group       | Description                                       | pvalue     | geneID                                                                                                                                                                                     | Count |
|-------------|-------------|-----------|-------------------------|---------------------------------------------------|------------|--------------------------------------------------------------------------------------------------------------------------------------------------------------------------------------------|-------|
| MT1G        | 5.7364888   | 0         | M1_TAM_LGALS3_MT1H_MT1G | Proteasome                                        | 1.38E-20   | PSMA1/PSMA3/PSMA6/PSMA7/PSMB1/PSMB2/PSMB3/PSMB4/PSMB5/PSMB6/PSMC1/PSMD1/PSMD2/PSMD11/SEM1/ADRM1/POMP                                                                                       | 17    |
| MT1X        | 4.761527992 | 0         | M1_TAM_LGALS3_MT1H_MT1G | Parkinson disease                                 | 2.43E-17   | ATP5MC3/CALM3/COX6C/NDUFA4/NDUFB2/PSMA1/PSMA3/PSMA6/PSMA7/PSMB1/PSMB2/PSMB3/PSMB4/PSMB5/PSMB6/PSMC1/PSMD1/PSMD2/PSMD11/SOD1/TXN/SEM1/COX5A/TUBA1B/ADRM1/UQCRCQ/UQCR10/TUBA1C               | 28    |
| MT1H        | 4.688811774 | 0         | M1_TAM_LGALS3_MT1H_MT1G | Prion disease                                     | 4.89E-16   | ATP5MC3/COX6C/CSNK2B/NDUFA4/NDUFB2/PSMA1/PSMA3/PSMA6/PSMA7/PSMB1/PSMB2/PSMB3/PSMB4/PSMB5/PSMB6/PSMC1/PSMD1/PSMD2/PSMD11/SOD1/SEM1/COX5A/TUBA1B/ADRM1/UQCRCQ/UQCR10/TUBA1C                  | 27    |
| MT2A        | 4.403011745 | 0         | M1_TAM_LGALS3_MT1H_MT1G | Huntington disease                                | 8.62E-15   | ATP5MC3/AP2S1/COX6C/NDUFA4/NDUFB2/PSMA1/PSMA3/PSMA6/PSMA7/PSMB1/PSMB2/PSMB3/PSMB4/PSMB5/PSMB6/PSMC1/PSMD1/PSMD2/PSMD11/SOD1/SEM1/COX5A/TUBA1B/ADRM1/UQCRCQ/UQCR10/TUBA1C                   | 27    |
| MT1M        | 3.54827794  | 0         | M1_TAM_LGALS3_MT1H_MT1G | Amyotrophic lateral sclerosis                     | 1.08E-14   | ATP5MC3/COX6C/NDUFA4/NDUFB2/PSMA1/PSMA3/PSMA6/PSMA7/PSMB1/PSMB2/PSMB3/PSMB4/PSMB5/PSMB6/PSMC1/PSMD1/PSMD2/PSMD11/SOD1/VCP/SEM1/SQSTM1/COX5A/TUBA1B/ADRM1/UQCRCQ/UQCR10/TUBA1C/CHCHD10      | 29    |
| MT1E        | 3.284289521 | 0         | M1_TAM_LGALS3_MT1H_MT1G | Alzheimer disease                                 | 4.37E-14   | APOE/ATP5MC3/CALM3/COX6C/CSNK2B/GAPDH/NDUFA4/NDUFB2/PSMA1/PSMA3/PSMA6/PSMA7/PSMB1/PSMB2/PSMB3/PSMB4/PSMB5/PSMB6/PSMC1/PSMD1/PSMD2/PSMD11/SEM1/COX5A/TUBA1B/ADRM1/UQCRCQ/UQCR10/TUBA1C      | 29    |
| MT1F        | 2.066658999 | 1.04E-302 | M1_TAM_LGALS3_MT1H_MT1G | Mineral absorption                                | 1.38E-12   | ATOX1/FTH1/FTL/HMOX1/MT1A/MT1E/MT1F/MT1G/MT1H/MT1M/MT1X/MT2A/SLC30A1                                                                                                                       | 13    |
| SLC7A11     | 0.389148301 | 5.78E-105 | M1_TAM_LGALS3_MT1H_MT1G | Pathways of neurodegeneration - multiple diseases | 1.71E-12   | ATP5MC3/CALM3/COX6C/CSNK2B/NDUFA4/NDUFB2/PSMA1/PSMA3/PSMA6/PSMA7/PSMB1/PSMB2/PSMB3/PSMB4/PSMB5/PSMB6/PSMC1/PSMD1/PSMD2/PSMD11/SOD1/VCP/SEM1/SQSTM1/COX5A/TUBA1B/ADRM1/UQCRCQ/UQCR10/TUBA1C | 30    |
| MT1A        | 0.399556661 | 8.05E-103 | M1_TAM_LGALS3_MT1H_MT1G | Spinocerebellar ataxia                            | 1.26E-10   | PSMA1/PSMA3/PSMA6/PSMA7/PSMB1/PSMB2/PSMB3/PSMB4/PSMB5/PSMB6/PSMC1/PSMD1/PSMD2/PSMD11/SEM1/ADRM1                                                                                            | 16    |
| CSTB        | 1.297850061 | 3.59E-91  | M1_TAM_LGALS3_MT1H_MT1G | Glutathione metabolism                            | 1.36E-06   | GCLM/GPX4/GSR/GSTP1/MGST1/MGST3/PGD/GSTO1                                                                                                                                                  | 8     |
| TXN         | 1.14023552  | 6.51E-84  | M1_TAM_LGALS3_MT1H_MT1G | Oxidative phosphorylation                         | 2.73E-06   | ATP5MC3/ATP6V1A/ATP6V0B/COX6C/NDUFA4/NDUFB2/ATP6V1F/COX5A/ATP5MF/UQCRCQ/UQCR10                                                                                                             | 11    |
| TALDO1      | 1.105110723 | 3.71E-80  | M1_TAM_LGALS3_MT1H_MT1G | Chemical carcinogenesis - reactive oxygen species | 1.48E-05   | ATP5MC3/CBR1/COX6C/HMOX1/MGST1/MGST3/NDUFA4/NDUFB2/SOD1/COX5A/GSTO1/UQCRCQ/UQCR10                                                                                                          | 13    |
| CTSD        | 0.978330252 | 1.25E-76  | M1_TAM_LGALS3_MT1H_MT1G | Lysosome                                          | 1.62E-05   | ACP5/ATP6V0B/CD63/CD68/CTS/CTSD/CTSL/GM2A/LAMP1/CTSA                                                                                                                                       | 10    |
| TXNRD1      | 0.67399553  | 8.91E-72  | M1_TAM_LGALS3_MT1H_MT1G | Ferroptosis                                       | 2.14E-05   | FTH1/FTL/GCLM/GPX4/HMOX1/SLC7A11                                                                                                                                                           | 6     |
| FTL         | 0.67710159  | 1.26E-66  | M1_TAM_LGALS3_MT1H_MT1G | Fluid shear stress and atherosclerosis            | 2.54E-05   | CALM3/CTSL/GSTP1/HMOX1/HSP90A1/MGST1/MGST3/TXN/SQSTM1/GSTO1                                                                                                                                | 10    |
| SLC30A1     | 0.355047703 | 2.08E-66  | M1_TAM_LGALS3_MT1H_MT1G | Phagosome                                         | 0.00029098 | ATP6V1A/ATP6V0B/CALR/CTSL/LAMP1/ATP6V1F/TUBA1B/SEC61B/TUBA1C                                                                                                                               | 9     |
| PRDX1       | 0.879846659 | 3.19E-62  | M1_TAM_LGALS3_MT1H_MT1G | Diabetic cardiomyopathy                           | 0.00058474 | ATP5MC3/COX6C/CTSD/GAPDH/GSR/NDUFA4/NDUFB2/COX5A/UQCRCQ/UQCR10                                                                                                                             | 10    |
| OTOA        | 0.696478612 | 1.14E-58  | M1_TAM_LGALS3_MT1H_MT1G | Chemical carcinogenesis - DNA adducts             | 0.00286377 | CBR1/GSTP1/MGST1/MGST3/GSTO1                                                                                                                                                               | 5     |
| GCLM        | 0.641645864 | 3.49E-56  | M1_TAM_LGALS3_MT1H_MT1G | Metabolism of xenobiotics by cytochrome P450      | 0.00486483 | CBR1/GSTP1/MGST1/MGST3/GSTO1                                                                                                                                                               | 5     |
| PGD         | 0.6130467   | 2.22E-55  | M1_TAM_LGALS3_MT1H_MT1G | Riboflavin metabolism                             | 0.00527476 | ACP5/BLVRB                                                                                                                                                                                 | 2     |
| CYP27A1     | 0.455892999 | 2.91E-50  | M1_TAM_LGALS3_MT1H_MT1G | Vibrio cholerae infection                         | 0.0053419  | ATP6V1A/ATP6V0B/ATP6V1F/SEC61B                                                                                                                                                             | 4     |
| TREM2       | 0.567852575 | 3.71E-50  | M1_TAM_LGALS3_MT1H_MT1G | Thermogenesis                                     | 0.00555435 | ATP5MC3/COX6C/NDUFA4/NDUFB2/RHEB/COX5A/ATP5MF/UQCRCQ/UQCR10                                                                                                                                | 9     |
| SLC48A1     | 0.34503094  | 1.43E-48  | M1_TAM_LGALS3_MT1H_MT1G | Cardiac muscle contraction                        | 0.0077022  | ASPH/COX6C/COX5A/UQCRCQ/UQCR10                                                                                                                                                             | 5     |
| LGALS3      | 0.924489731 | 7.21E-47  | M1_TAM_LGALS3_MT1H_MT1G | Epstein-Barr virus infection                      | 0.0078228  | CALR/PSMC1/PSMD1/PSMD2/PSMD11/VIM/SEM1/ADRM1                                                                                                                                               | 8     |
| LGALS1      | 0.712344654 | 7.38E-44  | M1_TAM_LGALS3_MT1H_MT1G | Rheumatoid arthritis                              | 0.01013436 | ACP5/ATP6V1A/ATP6V0B/CTSL/ATP6V1F                                                                                                                                                          | 5     |
| GAPDH       | 0.698563169 | 2.76E-41  | M1_TAM_LGALS3_MT1H_MT1G | Tuberculosis                                      | 0.01384305 | ATP6V0B/CALM3/CTSD/HSPA9/ITGAX/LAMP1/LSP1                                                                                                                                                  | 7     |
| GNPMB       | 0.603197842 | 4.76E-41  | M1_TAM_LGALS3_MT1H_MT1G | Glycolysis / Gluconeogenesis                      | 0.01480303 | ENO1/GAPDH/LDHB/PKM                                                                                                                                                                        | 4     |
| HMOX1       | 1.720063037 | 1.15E-39  | M1_TAM_LGALS3_MT1H_MT1G | Autophagy - animal                                | 0.01484248 | CTSB/CTSD/CTSL/LAMP1/RHEB/SQSTM1                                                                                                                                                           | 6     |
| FABP3       | 0.455135736 | 2.18E-37  | M1_TAM_LGALS3_MT1H_MT1G | Drug metabolism - cytochrome P450                 | 0.01883194 | GSTP1/MGST1/MGST3/GSTO1                                                                                                                                                                    | 4     |
| SRXN1       | 0.321942667 | 6.90E-36  | M1_TAM_LGALS3_MT1H_MT1G | Platinum drug resistance                          | 0.01971147 | GSTP1/MGST1/MGST3/GSTO1                                                                                                                                                                    | 4     |
| BLVRB       | 0.62499508  | 1.22E-35  | M1_TAM_LGALS3_MT1H_MT1G | Biosynthesis of amino acids                       | 0.0215458  | ENO1/GAPDH/PKM/TALDO1                                                                                                                                                                      | 4     |
| APOC1       | 1.02951045  | 3.95E-34  | M1_TAM_LGALS3_MT1H_MT1G | PPAR signaling pathway                            | 0.0215458  | CYP27A1/DBI/FABP3/FABP5                                                                                                                                                                    | 4     |

|          |             |          |                         |                                     |            |                                          |   |
|----------|-------------|----------|-------------------------|-------------------------------------|------------|------------------------------------------|---|
| CD9      | 0.457344523 | 2.51E-32 | M1_TAM_LGALS3_MT1H_MT1G | Non-alcoholic fatty liver disease   | 0.02258656 | COX6C/NDUFA4/NDUFB2/COX5A/UQCQRQ/UQCRR10 | 6 |
| ATP6V1F  | 0.543960987 | 5.17E-31 | M1_TAM_LGALS3_MT1H_MT1G | Carbon metabolism                   | 0.02346029 | ENO1/GAPDH/PGD/PKM/TALDO1                | 5 |
| ATOX1    | 0.624433499 | 2.34E-30 | M1_TAM_LGALS3_MT1H_MT1G | Antigen processing and presentation | 0.02448789 | CALR/CTSB/CTSL/HSP90AB1                  | 4 |
| SH3BGRL3 | 0.485276888 | 1.28E-29 | M1_TAM_LGALS3_MT1H_MT1G | Synaptic vesicle cycle              | 0.02448789 | ATP6V1A/ATP6V0B/AP2S1/ATP6V1F            | 4 |
| TUBA1C   | 0.536430955 | 1.36E-29 | M1_TAM_LGALS3_MT1H_MT1G | Drug metabolism - other enzymes     | 0.02657802 | GSTP1/MGST1/MGST3/GSTO1                  | 4 |
| ACOT13   | 0.307373596 | 8.05E-29 | M1_TAM_LGALS3_MT1H_MT1G | Hepatocellular carcinoma            | 0.03188264 | GSTP1/HMOX1/MGST1/MGST3/TXNRD1/GSTO1     | 6 |
| VAT1     | 0.38451565  | 1.42E-28 | M1_TAM_LGALS3_MT1H_MT1G | Cysteine and methionine metabolism  | 0.03358323 | GCLM/LDHB/ADI1                           | 3 |
| GLRX     | 0.511589269 | 5.52E-27 | M1_TAM_LGALS3_MT1H_MT1G | Cholesterol metabolism              | 0.03358323 | APOC1/APOE/CYP27A1                       | 3 |
| LAMP1    | 0.47746829  | 5.74E-27 | M1_TAM_LGALS3_MT1H_MT1G | Protein export                      | 0.04151921 | SRP14/SEC61B                             | 2 |
| FABP5    | 0.67928301  | 6.63E-26 | M1_TAM_LGALS3_MT1H_MT1G | Apoptosis                           | 0.04368435 | CTSB/CTSD/CTSL/TUBA1B/TUBA1C             | 5 |
| HINT1    | 0.554436795 | 6.67E-26 | M1_TAM_LGALS3_MT1H_MT1G |                                     |            |                                          |   |
| ASPH     | 0.272135604 | 8.60E-25 | M1_TAM_LGALS3_MT1H_MT1G |                                     |            |                                          |   |
| SERF2    | 0.328474105 | 1.05E-24 | M1_TAM_LGALS3_MT1H_MT1G |                                     |            |                                          |   |
| SPP1     | 0.672022714 | 2.34E-24 | M1_TAM_LGALS3_MT1H_MT1G |                                     |            |                                          |   |
| PSMD11   | 0.377791175 | 1.47E-23 | M1_TAM_LGALS3_MT1H_MT1G |                                     |            |                                          |   |
| TDP2     | 0.253528279 | 1.71E-23 | M1_TAM_LGALS3_MT1H_MT1G |                                     |            |                                          |   |
| ENO1     | 0.531481427 | 2.88E-23 | M1_TAM_LGALS3_MT1H_MT1G |                                     |            |                                          |   |
| ANXA2    | 0.427158009 | 4.64E-23 | M1_TAM_LGALS3_MT1H_MT1G |                                     |            |                                          |   |
| ATP6V1A  | 0.349948298 | 4.93E-23 | M1_TAM_LGALS3_MT1H_MT1G |                                     |            |                                          |   |
| GSR      | 0.357216583 | 9.04E-23 | M1_TAM_LGALS3_MT1H_MT1G |                                     |            |                                          |   |
| CAPG     | 0.44335683  | 2.22E-22 | M1_TAM_LGALS3_MT1H_MT1G |                                     |            |                                          |   |
| GSTO1    | 0.454276705 | 4.03E-22 | M1_TAM_LGALS3_MT1H_MT1G |                                     |            |                                          |   |
| VCP      | 0.377554144 | 5.48E-22 | M1_TAM_LGALS3_MT1H_MT1G |                                     |            |                                          |   |
| FKBP4    | 0.357111538 | 1.27E-21 | M1_TAM_LGALS3_MT1H_MT1G |                                     |            |                                          |   |
| SQSTM1   | 0.629992279 | 9.77E-21 | M1_TAM_LGALS3_MT1H_MT1G |                                     |            |                                          |   |
| CD63     | 0.395229751 | 1.41E-20 | M1_TAM_LGALS3_MT1H_MT1G |                                     |            |                                          |   |
| PKM      | 0.47457508  | 1.58E-20 | M1_TAM_LGALS3_MT1H_MT1G |                                     |            |                                          |   |
| SELENOW  | 0.390628989 | 5.53E-20 | M1_TAM_LGALS3_MT1H_MT1G |                                     |            |                                          |   |
| ACP5     | 0.464136803 | 7.90E-20 | M1_TAM_LGALS3_MT1H_MT1G |                                     |            |                                          |   |
| MGST3    | 0.477325376 | 1.30E-19 | M1_TAM_LGALS3_MT1H_MT1G |                                     |            |                                          |   |
| PLA2G7   | 0.327660284 | 1.35E-19 | M1_TAM_LGALS3_MT1H_MT1G |                                     |            |                                          |   |
| UQCQRQ   | 0.401169799 | 1.92E-19 | M1_TAM_LGALS3_MT1H_MT1G |                                     |            |                                          |   |
| HSPB1    | 0.651330932 | 3.16E-19 | M1_TAM_LGALS3_MT1H_MT1G |                                     |            |                                          |   |
| POMP     | 0.397222659 | 6.01E-19 | M1_TAM_LGALS3_MT1H_MT1G |                                     |            |                                          |   |
| IL18BP   | 0.286707519 | 7.38E-19 | M1_TAM_LGALS3_MT1H_MT1G |                                     |            |                                          |   |
| RIT1     | 0.32458685  | 7.50E-19 | M1_TAM_LGALS3_MT1H_MT1G |                                     |            |                                          |   |
| NDUFA4   | 0.367144828 | 4.49E-18 | M1_TAM_LGALS3_MT1H_MT1G |                                     |            |                                          |   |
| CBR1     | 0.371695834 | 6.31E-18 | M1_TAM_LGALS3_MT1H_MT1G |                                     |            |                                          |   |
| PSMB3    | 0.416519779 | 6.43E-18 | M1_TAM_LGALS3_MT1H_MT1G |                                     |            |                                          |   |
| DBI      | 0.393153433 | 1.25E-16 | M1_TAM_LGALS3_MT1H_MT1G |                                     |            |                                          |   |
| SEM1     | 0.380389127 | 1.70E-16 | M1_TAM_LGALS3_MT1H_MT1G |                                     |            |                                          |   |
| PSMD2    | 0.285290998 | 2.37E-16 | M1_TAM_LGALS3_MT1H_MT1G |                                     |            |                                          |   |
| SEC61B   | 0.388445295 | 4.82E-16 | M1_TAM_LGALS3_MT1H_MT1G |                                     |            |                                          |   |
| GM2A     | 0.362548727 | 4.88E-16 | M1_TAM_LGALS3_MT1H_MT1G |                                     |            |                                          |   |
| TXNDC17  | 0.334610874 | 6.15E-16 | M1_TAM_LGALS3_MT1H_MT1G |                                     |            |                                          |   |
| BRI3     | 0.304187806 | 2.09E-15 | M1_TAM_LGALS3_MT1H_MT1G |                                     |            |                                          |   |
| CTSA     | 0.341559863 | 3.67E-15 | M1_TAM_LGALS3_MT1H_MT1G |                                     |            |                                          |   |
| GDF15    | 0.268488967 | 4.49E-15 | M1_TAM_LGALS3_MT1H_MT1G |                                     |            |                                          |   |
| RPS27L   | 0.352256091 | 9.44E-15 | M1_TAM_LGALS3_MT1H_MT1G |                                     |            |                                          |   |
| PSMA3    | 0.313356903 | 9.67E-15 | M1_TAM_LGALS3_MT1H_MT1G |                                     |            |                                          |   |
| PSMA1    | 0.309530501 | 1.66E-14 | M1_TAM_LGALS3_MT1H_MT1G |                                     |            |                                          |   |
| PSMA7    | 0.376739444 | 2.20E-14 | M1_TAM_LGALS3_MT1H_MT1G |                                     |            |                                          |   |
| SRP14    | 0.294376029 | 2.23E-14 | M1_TAM_LGALS3_MT1H_MT1G |                                     |            |                                          |   |
| PSMC1    | 0.252105416 | 4.38E-14 | M1_TAM_LGALS3_MT1H_MT1G |                                     |            |                                          |   |
| PSMB6    | 0.430538043 | 4.66E-14 | M1_TAM_LGALS3_MT1H_MT1G |                                     |            |                                          |   |
| PSMD1    | 0.294147187 | 5.88E-14 | M1_TAM_LGALS3_MT1H_MT1G |                                     |            |                                          |   |
| PSMB5    | 0.26616677  | 7.16E-14 | M1_TAM_LGALS3_MT1H_MT1G |                                     |            |                                          |   |
| S100A9   | 0.336864263 | 9.51E-14 | M1_TAM_LGALS3_MT1H_MT1G |                                     |            |                                          |   |
| ALDH1A1  | 0.310103454 | 1.10E-13 | M1_TAM_LGALS3_MT1H_MT1G |                                     |            |                                          |   |
| NPL      | 0.28763535  | 1.89E-13 | M1_TAM_LGALS3_MT1H_MT1G |                                     |            |                                          |   |
| UQCRR10  | 0.309621311 | 2.02E-13 | M1_TAM_LGALS3_MT1H_MT1G |                                     |            |                                          |   |
| CYTOR    | 0.267454784 | 2.54E-13 | M1_TAM_LGALS3_MT1H_MT1G |                                     |            |                                          |   |
| NOP10    | 0.359497335 | 3.00E-13 | M1_TAM_LGALS3_MT1H_MT1G |                                     |            |                                          |   |
| FERMT3   | 0.33060677  | 4.57E-13 | M1_TAM_LGALS3_MT1H_MT1G |                                     |            |                                          |   |

|          |             |            |                         |
|----------|-------------|------------|-------------------------|
| MGST1    | 0.307168451 | 9.76E-13   | M1_TAM_LGALS3_MT1H_MT1G |
| NDUFB2   | 0.298884598 | 1.06E-12   | M1_TAM_LGALS3_MT1H_MT1G |
| S100A11  | 0.377933405 | 1.14E-12   | M1_TAM_LGALS3_MT1H_MT1G |
| CREG1    | 0.283136406 | 1.26E-12   | M1_TAM_LGALS3_MT1H_MT1G |
| PLD3     | 0.314321325 | 2.42E-12   | M1_TAM_LGALS3_MT1H_MT1G |
| BCAP31   | 0.330509082 | 3.85E-12   | M1_TAM_LGALS3_MT1H_MT1G |
| PSMB2    | 0.359244929 | 8.99E-12   | M1_TAM_LGALS3_MT1H_MT1G |
| CALR     | 0.368244154 | 1.41E-11   | M1_TAM_LGALS3_MT1H_MT1G |
| AD1      | 0.346544215 | 1.57E-11   | M1_TAM_LGALS3_MT1H_MT1G |
| VIM      | 0.385604458 | 2.16E-11   | M1_TAM_LGALS3_MT1H_MT1G |
| MYL6     | 0.276642732 | 6.48E-11   | M1_TAM_LGALS3_MT1H_MT1G |
| HSP90A1  | 0.43090948  | 6.71E-11   | M1_TAM_LGALS3_MT1H_MT1G |
| GRN      | 0.277771462 | 7.74E-11   | M1_TAM_LGALS3_MT1H_MT1G |
| GSTP1    | 0.369918685 | 8.66E-11   | M1_TAM_LGALS3_MT1H_MT1G |
| ADRM1    | 0.302579342 | 1.17E-10   | M1_TAM_LGALS3_MT1H_MT1G |
| GPX4     | 0.293672691 | 1.65E-10   | M1_TAM_LGALS3_MT1H_MT1G |
| HSPA9    | 0.25402746  | 1.71E-10   | M1_TAM_LGALS3_MT1H_MT1G |
| COX6C    | 0.291108654 | 2.71E-10   | M1_TAM_LGALS3_MT1H_MT1G |
| ITGAX    | 0.315066847 | 3.58E-10   | M1_TAM_LGALS3_MT1H_MT1G |
| PLEKHB2  | 0.301145605 | 4.33E-10   | M1_TAM_LGALS3_MT1H_MT1G |
| CD68     | 0.316807862 | 4.86E-10   | M1_TAM_LGALS3_MT1H_MT1G |
| AP2S1    | 0.300947886 | 5.48E-10   | M1_TAM_LGALS3_MT1H_MT1G |
| SOD1     | 0.335170799 | 5.78E-10   | M1_TAM_LGALS3_MT1H_MT1G |
| CSNK2B   | 0.296566671 | 8.35E-10   | M1_TAM_LGALS3_MT1H_MT1G |
| LDHB     | 0.274505189 | 1.18E-09   | M1_TAM_LGALS3_MT1H_MT1G |
| FTH1     | 0.337330477 | 2.27E-09   | M1_TAM_LGALS3_MT1H_MT1G |
| RHEB     | 0.274382421 | 3.27E-09   | M1_TAM_LGALS3_MT1H_MT1G |
| PSMB4    | 0.280991638 | 1.09E-08   | M1_TAM_LGALS3_MT1H_MT1G |
| TOMM5    | 0.269568911 | 1.55E-08   | M1_TAM_LGALS3_MT1H_MT1G |
| CHCHD10  | 0.28979463  | 1.95E-08   | M1_TAM_LGALS3_MT1H_MT1G |
| TIMP2    | 0.294347259 | 2.41E-08   | M1_TAM_LGALS3_MT1H_MT1G |
| CTSB     | 0.284247001 | 3.55E-08   | M1_TAM_LGALS3_MT1H_MT1G |
| LSP1     | 0.308324454 | 5.30E-08   | M1_TAM_LGALS3_MT1H_MT1G |
| SNX3     | 0.260289565 | 8.59E-08   | M1_TAM_LGALS3_MT1H_MT1G |
| APOE     | 0.31654981  | 1.30E-07   | M1_TAM_LGALS3_MT1H_MT1G |
| MIF      | 0.275470199 | 1.41E-07   | M1_TAM_LGALS3_MT1H_MT1G |
| TUBA1B   | 0.362938201 | 1.64E-07   | M1_TAM_LGALS3_MT1H_MT1G |
| ATP5MC3  | 0.28762932  | 1.72E-07   | M1_TAM_LGALS3_MT1H_MT1G |
| ATP5MF   | 0.278758965 | 2.19E-07   | M1_TAM_LGALS3_MT1H_MT1G |
| ATP6V0B  | 0.306290964 | 3.21E-07   | M1_TAM_LGALS3_MT1H_MT1G |
| COX5A    | 0.280178583 | 4.77E-07   | M1_TAM_LGALS3_MT1H_MT1G |
| CD99     | 0.271348454 | 5.78E-07   | M1_TAM_LGALS3_MT1H_MT1G |
| PSMB1    | 0.252402508 | 7.59E-07   | M1_TAM_LGALS3_MT1H_MT1G |
| CTSL     | 0.310717396 | 1.19E-06   | M1_TAM_LGALS3_MT1H_MT1G |
| HSPE1    | 0.402250989 | 3.30E-06   | M1_TAM_LGALS3_MT1H_MT1G |
| MAFG     | 0.27309747  | 5.87E-06   | M1_TAM_LGALS3_MT1H_MT1G |
| CALM3    | 0.259204034 | 9.55E-06   | M1_TAM_LGALS3_MT1H_MT1G |
| RGCC     | 0.401316594 | 1.03E-05   | M1_TAM_LGALS3_MT1H_MT1G |
| PSMA6    | 0.269982938 | 9.20E-05   | M1_TAM_LGALS3_MT1H_MT1G |
| ZFAND2A  | 0.370505966 | 0.00033204 | M1_TAM_LGALS3_MT1H_MT1G |
| FGG      | 0.316874322 | 0.06134834 | M1_TAM_LGALS3_MT1H_MT1G |
| BAG3     | 0.287649869 | 0.08460486 | M1_TAM_LGALS3_MT1H_MT1G |
| TUBB     | 0.335181128 | 0.13167602 | M1_TAM_LGALS3_MT1H_MT1G |
| HULC     | 0.292313621 | 0.13566591 | M1_TAM_LGALS3_MT1H_MT1G |
| APOH     | 0.402769844 | 0.21638508 | M1_TAM_LGALS3_MT1H_MT1G |
| CYP2E1   | 0.664181296 | 0.2366479  | M1_TAM_LGALS3_MT1H_MT1G |
| H2AFZ    | 0.278382266 | 0.33372301 | M1_TAM_LGALS3_MT1H_MT1G |
| STMN1    | 0.264264011 | 0.40521844 | M1_TAM_LGALS3_MT1H_MT1G |
| APOC2    | 0.663111358 | 1          | M1_TAM_LGALS3_MT1H_MT1G |
| TTR      | 0.377571208 | 1          | M1_TAM_LGALS3_MT1H_MT1G |
| HSP90AA1 | 0.406851016 | 1          | M1_TAM_LGALS3_MT1H_MT1G |
| UBC      | 0.311163984 | 1          | M1_TAM_LGALS3_MT1H_MT1G |
| GSTA1    | 0.403142522 | 1          | M1_TAM_LGALS3_MT1H_MT1G |

---

## g.M2\_TAM\_KRAS\_LILRA2

| Gene symbol | avg_log2FC  | p_val_adj | Upregulated group  | Description                                       | pvalue   | geneID                                                                                                                                                                                                                                                                                                                                                                                                                                                                                                                | Count |
|-------------|-------------|-----------|--------------------|---------------------------------------------------|----------|-----------------------------------------------------------------------------------------------------------------------------------------------------------------------------------------------------------------------------------------------------------------------------------------------------------------------------------------------------------------------------------------------------------------------------------------------------------------------------------------------------------------------|-------|
| TIMP1       | 2.819235923 | 0         | M2_TAM_KRAS_LILRA2 | Coronavirus disease - COVID-19                    | 1.93E-47 | C5AR1/CASP17/CYBB/CFD/FAU/IL1B/JAK1/RPSA/MX2/MYD88/RPL10A/NFKB1/NFKBIA/OAS1/PRKCB/RPL3/RPL4/RPL5/RPL6/RPL7/RPL7A/RPL8/RPL9/RPL10/RPL11/RPL12/RPL13/RPL15/RPL17/RPL18/RPL18A/RPL19/RPL21/RPL22/RPL23A/RPL24/RPL26/RPL30/RPL28/RPL29/RPL32/RPL34/RPL35A/RPL37/RPL39/RPL41/RPL36A/RPLP0/RPLP1/RPLP2/RPS2/RPS3/RPS3A/RPS4X/RPS4Y1/RPS5/RPS6/RPS7/RPS8/RPS9/RPS10/RPS11/RPS12/RPS13/RPS14/RPS15/RPS15A/RPS16/RPS18/RPS19/RPS21/RPS23/RPS24/RPS25/RPS26/RPS27/RPS27A/RPS28/RPS29/TLR2/UBA52/RPL14/RPL23/ISG15/NLRP3/RPL22L1 | 86    |
| G0S2        | 2.729752059 | 0         | M2_TAM_KRAS_LILRA2 | Ribosome                                          | 6.85E-46 | FAU/RPSA/RPL10A/RPL3/RPL4/RPL5/RPL6/RPL7/RPL7A/RPL8/RPL9/RPL10/RPL11/RPL12/RPL13/RPL15/RPL17/RPL18/RPL18A/RPL19/RPL21/RPL22/RPL23A/RPL24/RPL26/RPL30/RPL28/RPL29/RPL32/RPL34/RPL35A/RPL37/RPL39/RPL41/RPL36A/RPLP0/RPLP1/RPLP2/RPS2/RPS3/RPS3A/RPS4X/RPS4Y1/RPS5/RPS6/RPS7/RPS8/RPS9/RPS10/RPS11/RPS12/RPS13/RPS14/RPS15/RPS15A/RPS16/RPS18/RPS19/RPS21/RPS23/RPS24/RPS25/RPS26/RPS27/RPS27A/RPS28/RPS29/UBA52/RPL14/RPL23/RPL22L1                                                                                    | 71    |
| LST1        | 2.443817978 | 0         | M2_TAM_KRAS_LILRA2 | Parkinson disease                                 | 1.26E-09 | ADORA2A/SLC25A5/SLC25A6/ATP5F1A/ATP5F1B/ATP5F1D/ATP5PB/ATP5MC2/ATP5PO/COX411/COX5B/COX6A1/COX6B1/COX7A2/COX7B/COX7C/COX8A/CYC1/GNAI2/NDUFB5/PSMA2/PSMA4/PSMA6/PSMA6/PSMB3/RPS27A/SOD1/UBA52/UBC/UQCRC1/UQCRC1/VDAC2/UBE2L6/COX5A/PPIF/ADRM1/NDUFA13/UBE2J1/CYCS/NDUFA12/CALML4/LRRK2/NDUFS7                                                                                                                                                                                                                           | 43    |
| FCN1        | 2.39748793  | 0         | M2_TAM_KRAS_LILRA2 | Diabetic cardiomyopathy                           | 2.35E-09 | SLC25A5/SLC25A6/ATP5F1A/ATP5F1B/ATP5F1D/ATP5PB/ATP5MC2/ATP5PO/COX411/COX5B/COX6A1/COX6B1/COX7A2/COX7B/COX7C/COX8A/CYBA/CYBB/CYC1/NCF2/NDUFB5/NFKB1/PPP1CA/PPP1CB/PRKCB/RAC2/TGFB1/UQCRC1/UQCRC1/UQCRC1/VDAC2/COX5A/PPIF/NDUFA13/NDUFA12/NDUFS7                                                                                                                                                                                                                                                                        | 36    |
| S100A4      | 2.389670899 | 0         | M2_TAM_KRAS_LILRA2 | Chemical carcinogenesis - reactive oxygen species | 2.68E-09 | SLC25A5/SLC25A6/ATP5F1A/ATP5F1B/ATP5F1D/ATP5PB/ATP5MC2/ATP5PO/COX411/COX5B/COX6A1/COX6B1/COX7A2/COX7B/COX7C/COX8A/CYBA/CYC1/GRB2/HIF1A/KRAS/NCF2/NDUFB5/NFKB1/NFKBIA/PTPN1/SOD1/SOD2/UQCRC1/UQCRC1/UQCRC1/VDAC2/COX5A/GSTO1/PPIF/NDUFA13/NDUFA12/NDUFS7                                                                                                                                                                                                                                                               | 38    |
| COTL1       | 2.379252482 | 0         | M2_TAM_KRAS_LILRA2 | Oxidative phosphorylation                         | 3.51E-09 | ATP5F1A/ATP5F1B/ATP5F1D/ATP5PB/ATP5MC2/ATP5PO/COX411/COX5B/COX6A1/COX6B1/COX7A2/COX7B/COX7C/COX8A/CYC1/NDUFB5/PPA1/UQCRC1/UQCRC1/UQCRC1/VDAC2/COX5A/ATP6V1G1/TCIRG1/ATP5MG/NDUFA13/CYCS/NDUFA12/NDUFS7                                                                                                                                                                                                                                                                                                                | 28    |
| STXBP2      | 1.740817147 | 0         | M2_TAM_KRAS_LILRA2 | Salmonella infection                              | 1.91E-08 | ACTB/ACTG1/BIRC3/RHOA/RHOG/CASP1/CASP4/CDC42/CTNBB1/FLNA/IL1B/MYD88/NFKB1/NFKBIA/PAK1/PFN1/PIK3CG/PKN1/PTPRC/RPS3/RRAS/S100A10/TCF7L2/TLR2/STX10/RIPK2/CYTH1/ARPC3/ARPC1B/ACTR3/ACTR2/ARPC2/CYFIP2/PYCARD/CYCS/SBRK1/MYL12B/SNX18/NLRP3                                                                                                                                                                                                                                                                               | 39    |
| CD52        | 1.566688502 | 0         | M2_TAM_KRAS_LILRA2 | Prion disease                                     | 2.79E-08 | SLC25A5/SLC25A6/ATP5F1A/ATP5F1B/ATP5F1D/ATP5PB/ATP5MC2/ATP5PO/COX411/COX5B/COX6A1/COX6B1/COX7A2/COX7B/COX7C/COX8A/CYBA/CYBB/CYC1/FYN/HSPA8/IL1B/NCF2/NDUFB5/PSMA2/PSMA4/PSMA6/PSMB3/RAC2/SOD1/UQCRC1/UQCRC1/VDAC2/COX5A/PPIF/ADRM1/NDUFA13/CYCS/NDUFA12/NDUFS7                                                                                                                                                                                                                                                        | 41    |
| SMIM25      | 1.490206216 | 0         | M2_TAM_KRAS_LILRA2 | Shigellosis                                       | 4.79E-08 | ACTB/ACTG1/RHOA/CAPNS1/CAST/CASP1/CASP4/CD44/CDC42/DIAPH1/HK1/HK3/IL1B/MYD88/NFKB1/NFKBIA/PFN1/RPS27A/TLN1/UBA52/UBC/UBE2D1/RIPK2/CYTH1/RBX1/ARPC3/ARPC1B/ACTR3/ACTR2/ARPC2/WASF2/TNIP1/SEPTIN9/MALT1/PYCARD/CYCS/MYL12B/NLRP3                                                                                                                                                                                                                                                                                        | 38    |
| RPS19       | 1.385750055 | 0         | M2_TAM_KRAS_LILRA2 | Viral myocarditis                                 | 2.54E-07 | ACTB/ACTG1/BID/CD86/CD55/EIF4G2/FYN/HLA-B/HLA-C/HLA-DQB1/HLA-E/HLA-F/ITGAL/ITGB2/RAC2/CYCS                                                                                                                                                                                                                                                                                                                                                                                                                            | 16    |
| WARS        | 1.354867136 | 0         | M2_TAM_KRAS_LILRA2 | Leishmaniasis                                     | 3.95E-07 | CYBA/CYBB/EEF1A1/FCGR3A/HLA-DQB1/IFNGR2/IL1B/ITGB2/JAK1/MYD88/NCF2/NFKB1/NFKBIA/PRKCB/PTPN6/TGFB1/TLR2/MARCKSL1                                                                                                                                                                                                                                                                                                                                                                                                       | 18    |
| CD48        | 1.3509301   | 0         | M2_TAM_KRAS_LILRA2 | Osteoclast differentiation                        | 4.04E-07 | CYBA/CYLD/FCGR3A/FOSL2/FYN/GRB2/IFNGR2/IL1B/JAK1/JUND/NCF2/NFKB1/NFKBIA/RELB/SP1/TGFB1/SOCS3/LILRB2/LILRB3/LILRA1/LILRB3/LILRA2/OSCAR/LILRA5                                                                                                                                                                                                                                                                                                                                                                          | 24    |
| LILRA5      | 1.28211907  | 0         | M2_TAM_KRAS_LILRA2 | Pathogenic Escherichia coli infection             | 5.17E-07 | ACTB/ACTG1/RHOA/CASP1/CASP4/CDC42/FYN/IL1B/MYO1F/MYD88/NFKB1/NFKBIA/PAK1/PAK2/PTPN6/RPS3/EZR/ARHGEF1/CYTH1/ARPC3/ARPC1B/ACTR3/ACTR2/ARPC2/WASF2/CYFIP2/PYCARD/CYCS/BRK1/MYO1G/NLRP3                                                                                                                                                                                                                                                                                                                                   | 31    |
| CFP         | 1.189739394 | 0         | M2_TAM_KRAS_LILRA2 | B cell receptor signaling pathway                 | 1.07E-06 | CD79B/GRB2/KRAS/LYN/NFKB1/NFKBIA/PRKCB/PTPN6/RAC2/IFITM1/LILRB2/LILRB1/MALT1/LILRA1/LILRB3/LILRA2/PIK3AP1/LILRA5                                                                                                                                                                                                                                                                                                                                                                                                      | 18    |
| CYTIP       | 1.061453235 | 0         | M2_TAM_KRAS_LILRA2 | Yersinia infection                                | 1.46E-06 | ACTB/ACTG1/RHOA/RHOG/CASP1/CDC42/FYB1/IL1B/MYD88/NFKB1/NFKBIA/PKN1/RAC2/WAS/ARHGEF1/ARPC3/ARPC1B/ACTR3/ACTR2/ARPC2/WASF2/PYCARD/NLRP3/TICAM1                                                                                                                                                                                                                                                                                                                                                                          | 24    |



|          |             |           |                    |                                                   |            |                                                                                                                                                                                                                                                                                                                                                 |    |
|----------|-------------|-----------|--------------------|---------------------------------------------------|------------|-------------------------------------------------------------------------------------------------------------------------------------------------------------------------------------------------------------------------------------------------------------------------------------------------------------------------------------------------|----|
| AQP9     | 1.020655313 | 0         | M2_TAM_KRAS_LILRA2 | C-type lectin receptor signaling pathway          | 2.50E-06   | RHOA/BCL3/CASP1/PLK3/CYLD/FCER1G/IL1B/IRF1/KRAS/LSP1/NFKB1/NFKBIA/PAK1/RELB/RRAS/MALT1/PYCARD/CLEC7A/CALML4/NLRP3                                                                                                                                                                                                                               | 20 |
| CDC42EP2 | 0.876051844 | 0         | M2_TAM_KRAS_LILRA2 | Leukocyte transendothelial migration              | 2.90E-06   | ACTB/ACTG1/RHOA/CDC42/CTNNA1/CYBA/CYBB/GNAI2/ITGAL/ITGB2/MSN/NCF2/PECAM1/PRKCB/RAC2/RAP1B/VASP/EZR/CXCR4/RASSF5/MYL12B                                                                                                                                                                                                                          | 21 |
| SLC2A6   | 0.864081483 | 0         | M2_TAM_KRAS_LILRA2 | Fc gamma R-mediated phagocytosis                  | 3.35E-06   | CDC42/CFL1/FCGR3A/HCK/LYN/MARCKS/PAK1/PRKCB/PTPRC/RAC2/VASP/WAS/ARPC3/ARPC1B/ACTR3/ACTR2/ARPC2/WASF2/MARCKSL1                                                                                                                                                                                                                                   | 19 |
| RPL28    | 0.985416306 | 2.27E-299 | M2_TAM_KRAS_LILRA2 | Non-alcoholic fatty liver disease                 | 4.22E-06   | BID/CDC42/COX41/COX5B/COX6A1/COX6B1/COX7A2/COX7B/COX7C/COX8A/CYC1/IL1B/NDUFB5/NFKB1/RXRA/TGFB1/UQCRCB/UQCRC1/UQCRFS1/SOCS3/COX5A/NDUFA13/CYCS/NDUFA12/NDUFS7                                                                                                                                                                                    | 25 |
| IFI30    | 2.019772811 | 1.19E-297 | M2_TAM_KRAS_LILRA2 | Regulation of actin cytoskeleton                  | 4.74E-06   | ACTB/ACTG1/RHOA/CDC42/CFL1/DIAPH1/ITGAL/ITGB2/KRAS/MSN/PAK1/PAK2/PFN1/PPP1CA/PPP1CB/RAC2/RRAS/EZR/CXCR4/ARHGEF1/ARPC3/ARPC1B/ACTR3/ACTR2/ARPC2/WASF2/CYFIP2/BRK1/SSH2/MYL12B/SPATA13                                                                                                                                                            | 31 |
| C19orf38 | 0.780639126 | 1.44E-295 | M2_TAM_KRAS_LILRA2 | Tuberculosis                                      | 7.19E-06   | RHOA/BID/CEBPB/PLK3/CTSS/FCER1G/FCGR3A/HLA-DQB1/IFNGR2/IL1B/IL10RA/IL10RB/ITGB2/JAK1/LSP1/MYD88/NFKB1/TGFB1/TLR2/VDNR/RIPK2/TCIRG1/MALT1/CORO1A/CYCS/CLEC7A/CALML4                                                                                                                                                                              | 27 |
| CD37     | 1.367441618 | 2.47E-287 | M2_TAM_KRAS_LILRA2 | Kaposi sarcoma-associated herpesvirus infection   | 1.03E-05   | BID/CD86/CDKN1A/CTNNA1/GNB2/GNG5/HCK/HIF1A/HLA-B/HLA-C/HLA-E/HLA-F/IRF7/JAK1/KRAS/LYN/NFKB1/NFKBIA/PIK3CG/RPS27A/TCF7L2/JBA52/UBC/CYCS/GNG2/ATG3/CALML4/TICAM1                                                                                                                                                                                  | 28 |
| RPL8     | 1.067812801 | 7.16E-286 | M2_TAM_KRAS_LILRA2 | Huntington disease                                | 1.10E-05   | AP2A1/SLC25A5/SLC25A6/ATP5F1A/ATP5F1B/ATP5F1D/ATP5PB/ATP5MC2/ATP5PO/CLTB/COX41/COX5B/COX6A1/COX6B1/COX7A2/COX7B/COX7C/COX8A/CYC1/NDUFB5/PSMA2/PSMA4/PSMA6/PSMB3/SOD1/SOD2/TGM2/UQCRCB/UQCRC1/UQCRFS1/VDAC2/COX5A/PPIF/ADRM1/NDUFA13/CYCS/NDUFA12/NDUFS7                                                                                         | 38 |
| CD300E   | 0.66287768  | 5.98E-284 | M2_TAM_KRAS_LILRA2 | Pathways of neurodegeneration - multiple diseases | 1.17E-05   | SLC25A5/SLC25A6/ATP5F1A/ATP5F1B/ATP5F1D/ATP5PB/ATP5MC2/ATP5PO/BID/COX41/COX5B/COX6A1/COX6B1/COX7A2/COX7B/COX7C/COX8A/CYC1/CYBB/CYC1/IL1B/KRAS/RAB8A/NDUFB5/NFKB1/PRKCB/PSEN1/PSMA2/PSMA4/PSMA6/PSMB3/RPS27A/SOD1/TNFRSF1B/UBA52/UBC/UQCRCB/UQCRC1/UQCRFS1/VDAC2/UBE2L6/COX5A/PPIF/ADRM1/NDUFA13/UBE2J1/CYCS/NDUFA12/CALML4/LRRK2/C9orf72/NDUFS7 | 52 |
| MYO1G    | 0.807163485 | 4.02E-283 | M2_TAM_KRAS_LILRA2 | NOD-like receptor signaling pathway               | 3.11E-05   | BIRC3/RHOA/CASP1/CASP4/CYBA/CYBB/GBP1/GBP2/IL1B/IRF7/JAK1/MYD88/NFKB1/NFKBIA/OAS1/PKN1/VDAC2/RIPK2/NAMPT/GABARAP/GABARAPL1/PYCARD/NLRP3/CARD16/GBP4/TICAM1                                                                                                                                                                                      | 26 |
| BCL2A1   | 1.796412195 | 9.39E-281 | M2_TAM_KRAS_LILRA2 | Thermogenesis                                     | 4.41E-05   | ACTB/ACTG1/ATP5F1A/ATP5F1B/ATP5F1D/ATP5PB/ATP5MC2/ATP5PO/COX41/COX5B/COX6A1/COX6B1/COX7A2/COX7B/COX7C/COX8A/CYC1/ACSL1/GRB2/KRAS/NDUFB5/RPS6/UQCRCB/UQCRC1/UQCRFS1/COX5A/ATP5MG/NDUFA13/NDUFA12/NDUFS7                                                                                                                                          | 30 |
| PLAC8    | 1.126125568 | 4.58E-274 | M2_TAM_KRAS_LILRA2 | Amyotrophic lateral sclerosis                     | 5.15E-05   | ACTB/ACTG1/ATP5F1A/ATP5F1B/ATP5F1D/ATP5PB/ATP5MC2/ATP5PO/BID/CASP1/COX41/COX5B/COX6A1/COX6B1/COX7A2/COX7B/COX7C/COX8A/CYC1/RAB8A/NDUFB5/PFN1/PSMA2/PSMA4/PSMA6/PSMB3/SOD1/TNFRSF1B/UQCRCB/UQCRC1/UQCRFS1/COX5A/NUP50/ADRM1/NXT1/NDUFA13/CYCS/NDUFA12/C9orf72/NDUFS7/CHCHD10                                                                     | 41 |
| FAU      | 0.949376087 | 7.50E-274 | M2_TAM_KRAS_LILRA2 | Chemokine signaling pathway                       | 6.53E-05   | RHOA/ARRB1/CDC42/CX3CR1/DOCK2/FGR/GNAI2/GNB2/GNG5/GRK6/GRB2/HCK/KRAS/LYN/NFKB1/NFKBIA/PAK1/PIK3CG/PRKCB/RAC2/RAP1B/CCL20/WAS/CXCR4/RASGRP2/GNG2                                                                                                                                                                                                 | 26 |
| RPL41    | 0.911651828 | 2.58E-263 | M2_TAM_KRAS_LILRA2 | Legionellosis                                     | 0.00010444 | CASP1/EEF1A1/EEF1G/HSPA8/IL1B/ITGB2/MYD88/NFKB1/NFKBIA/TLR2/PYCARD/CYCS                                                                                                                                                                                                                                                                         | 12 |
| CSTA     | 0.781416444 | 1.07E-259 | M2_TAM_KRAS_LILRA2 | Platelet activation                               | 0.00012227 | ACTB/ACTG1/RHOA/FCER1G/FYN/GNAI2/LYN/PIK3CG/PPP1CA/PPP1CB/PTGIR/RAP1B/TBXAS1/TLN1/VASP/ARHGEF1/RASGRP2/APBB1IP/MYL12B                                                                                                                                                                                                                           | 19 |
| FTH1     | 1.201237153 | 4.64E-258 | M2_TAM_KRAS_LILRA2 | Human immunodeficiency virus 1 infection          | 0.00013728 | B2M/BID/CFL1/GNAI2/GNB2/GNG5/HLA-B/HLA-C/HLA-E/HLA-F/KRAS/MYD88/NFKB1/NFKBIA/PAK1/PAK2/PRKCB/RAC2/ELOB/TLR2/TNFRSF1B/CXCR4/AP1S2/RBX1/CYCS/GNG2/CALML4                                                                                                                                                                                          | 27 |
| FPR1     | 0.912802738 | 1.59E-257 | M2_TAM_KRAS_LILRA2 | Bacterial invasion of epithelial cells            | 0.00015197 | ACTB/ACTG1/RHOA/RHOG/CDC42/CLTB/CTNNA1/ARPC3/ARPC1B/ACTR3/ACTR2/ARPC2/WASF2/SEPTIN9                                                                                                                                                                                                                                                             | 14 |
| NAMPT    | 1.343384327 | 4.33E-257 | M2_TAM_KRAS_LILRA2 | Human cytomegalovirus infection                   | 0.00015485 | RHOA/B2M/BID/CDKN1A/CTNNA1/GNAI2/GNB2/GNG5/GRB2/HLA-B/HLA-C/HLA-E/HLA-F/IL1B/IL10RA/IL10RB/JAK1/KRAS/NFKB1/NFKBIA/PRKCB/PTGER2/RAC2/CXCR4/ARHGEF1/CYCS/GNG2/CALML4                                                                                                                                                                              | 28 |
| RPS8     | 0.998852092 | 6.63E-254 | M2_TAM_KRAS_LILRA2 | Cardiac muscle contraction                        | 0.00016584 | ATP1A1/ATP1B3/COX41/COX5B/COX6A1/COX6B1/COX7A2/COX7B/COX7C/COX8A/CYC1/UQCRCB/UQCRC1/UQCRFS1/COX5A                                                                                                                                                                                                                                               | 15 |

|         |             |           |                    |                                           |            |                                                                                                                                                                                                                                                                           |    |
|---------|-------------|-----------|--------------------|-------------------------------------------|------------|---------------------------------------------------------------------------------------------------------------------------------------------------------------------------------------------------------------------------------------------------------------------------|----|
| GCH1    | 0.861167952 | 6.38E-250 | M2_TAM_KRAS_LILRA2 | Alzheimer disease                         | 0.00017043 | SLC25A5/SLC25A6/ATP5F1A/ATP5F1B/ATP5F1D/ATP5PB/ATP5MC2/ATP5PO/BID/COX41/COX5B/COX6A1/COX6B1/COX7A2/COX7B/COX7C/COX8A/CTNNB1/CYBB/CYC1/IL1B/KRAS/NDUFB5/NFKB1/PSEN1/PSMA2/PSMA4/PSMA6/PSMB3/UQCRB/UQCRC1/UQCRFS1/VDAC2/COX5A/PP1F/ADRM1/NDUFA13/CYCS/NDUFA12/CALML4/NDUFS7 | 41 |
| EMP3    | 1.488776782 | 5.83E-249 | M2_TAM_KRAS_LILRA2 | Lipid and atherosclerosis                 | 0.00017394 | RHOA/BID/CASP1/CDC42/CYBA/CYBB/HSPA8/IL1B/IRF7/KRAS/LYN/MYD88/NCF2/NFKB1/NFKBIA/OLR1/POU2F2/RAP1B/RXRA/SOD2/TLR2/ARHGEF1/PYCARD/CYCS/CALML4/NLRP3/TICAM1                                                                                                                  | 27 |
| CLEC12A | 0.766617418 | 9.81E-249 | M2_TAM_KRAS_LILRA2 | Endocytosis                               | 0.00018829 | AP2A1/ARF5/RHOA/ARRB1/CAPZA1/CDC42/CLTB/GRK6/HLA-B/HLA-C/HLA-E/HLA-F/HSPA8/RAB8A/TFRC/CXCR4/CYTH1/QSEC1/ARPC3/ARPC1B/ACTR3/ACTR2/ARPC2/RAB10/EHD1/ACAP2/VPS29/VPS35/SMAP2/ARAP2                                                                                           | 30 |
| PTP4A2  | 1.234029719 | 1.64E-248 | M2_TAM_KRAS_LILRA2 | Influenza A                               | 0.00018939 | ACTB/ACTG1/SLC25A5/SLC25A6/BID/CASP1/HLA-DQB1/IFNGR2/IL1B/IRF7/JAK1/MX2/MYD88/NFKB1/NFKBIA/OAS1/PRKCB/SOCS3/NXT1/PYCARD/CYCS/NLRP3/TICAM1                                                                                                                                 | 23 |
| CORO1A  | 1.179892    | 1.11E-247 | M2_TAM_KRAS_LILRA2 | Proteoglycans in cancer                   | 0.00019481 | ACTB/ACTG1/RHOA/CD44/CDC42/CDKN1A/CTNNB1/DDX5/FLNA/GRB2/HIF1A/KRAS/MSN/PAK1/PLAUR/PPP1CA/PPP1CB/PRKCB/PTPN6/RPS6/RRAS/TGFB1/THBS1/TLR2/EZR/ARHGEF1                                                                                                                        | 26 |
| RPL10   | 0.91313282  | 6.34E-246 | M2_TAM_KRAS_LILRA2 | HIF-1 signaling pathway                   | 0.00022151 | CDKN1A/CDKN1B/CYBB/HIF1A/HK1/HK3/IFNGR2/NFKB1/PFKFB3/PKG1/PRKCB/RPS6/ELOB/TFRC/TIMP1/EIF4E2/RBX1                                                                                                                                                                          | 17 |
| RPL18   | 0.908052448 | 9.21E-245 | M2_TAM_KRAS_LILRA2 | Phagosome                                 | 0.00024562 | ACTB/ACTG1/CTSS/CYBA/CYBB/FCGR3A/HLA-B/HLA-C/HLA-DQB1/HLA-E/HLA-F/ITGB2/NCF2/OLR1/TFRC/THBS1/TLR2/ATP6V1G1/TCIRG1/CORO1A/CLEC7A                                                                                                                                           | 21 |
| ADGRE1  | 0.575921758 | 2.06E-244 | M2_TAM_KRAS_LILRA2 | Natural killer cell mediated cytotoxicity | 0.00025543 | BID/CD48/FCER1G/FCGR3A/FYN/GRB2/HLA-B/HLA-C/HLA-E/ICAM2/IFNGR2/ITGAL/ITGB2/KRAS/PAK1/PRKCB/PTPN6/RAC2/SH3BP2                                                                                                                                                              | 19 |
| H3F3A   | 0.943150368 | 1.21E-238 | M2_TAM_KRAS_LILRA2 | Rap1 signaling pathway                    | 0.00028721 | ACTB/ACTG1/ADORA2A/RHOA/CDC42/CTNNB1/FPR1/FYB1/GNAI2/ITGAL/ITGB2/KRAS/PFN1/PRKCB/RAC2/RALB/RAP1B/RRAS/THBS1/TLN1/VASP/RASGRP2/EVL/APBB1/P/RASSF5/CALML4                                                                                                                   | 26 |
| IFITM2  | 1.948653633 | 9.24E-236 | M2_TAM_KRAS_LILRA2 | Proteasome                                | 0.00029735 | PSMA2/PSMA4/PSMA6/PSMB3/PSMB8/PSMB9/PSMB10/PSME1/PSME2/ADRM1                                                                                                                                                                                                              | 10 |
| EREG    | 1.157651605 | 2.94E-235 | M2_TAM_KRAS_LILRA2 | Neutrophil extracellular trap formation   | 0.00036211 | ACTB/ACTG1/SLC25A5/SLC25A6/AQP9/C5AR1/CASP1/CASP4/CYBA/CYBB/FCGR3A/FPR1/FPR2/ITGAL/ITGB2/NCF2/NFKB1/PRKCB/RAC2/SELPLG/TLR2/VDAC2/PP1F/CLE7A                                                                                                                               | 24 |
| SERP1   | 1.096936432 | 2.05E-232 | M2_TAM_KRAS_LILRA2 | Pertussis                                 | 0.00048396 | RHOA/CASP1/CFL1/GNAI2/IL1B/IRF1/ITGB2/MYD88/NFKB1/PYCARD/CALML4/NLRP3/TICAM1                                                                                                                                                                                              | 13 |
| RPL11   | 0.914729156 | 3.70E-232 | M2_TAM_KRAS_LILRA2 | Adherens junction                         | 0.00088405 | ACTB/ACTG1/RHOA/CDC42/CTNNB1/FYN/PTPN1/PTPN6/RAC2/TCF7L2/WAS/WASF2                                                                                                                                                                                                        | 12 |
| NACA    | 1.081438003 | 3.31E-231 | M2_TAM_KRAS_LILRA2 | Epstein-Barr virus infection              | 0.00088602 | B2M/BID/RUNX3/CD44/CDKN1A/CDKN1B/HLA-B/HLA-C/HLA-DQB1/HLA-E/HLA-F/IRF7/ITGAL/JAK1/LYN/MYD88/NFKB1/NFKBIA/OAS1/RELB/TLR2/ISG15/ADRM1/CYCS                                                                                                                                  | 24 |
| RPS24   | 0.829270989 | 1.21E-230 | M2_TAM_KRAS_LILRA2 | Toxoplasmosis                             | 0.00091191 | BIRC3/GNAI2/HLA-DQB1/HSPA8/IFNGR2/IL10RA/IL10RB/JAK1/MYD88/NFKB1/NFKBIA/PIK3CG/TGFB1/TLR2/PP1F/CYCS                                                                                                                                                                       | 16 |
| RPL18A  | 0.879011377 | 1.21E-229 | M2_TAM_KRAS_LILRA2 | NF-kappa B signaling pathway              | 0.00118267 | BIRC3/BCL2A1/CYLD/IL1B/LTB/LYN/MYD88/NFKB1/NFKBIA/PRKCB/RELB/CFLAR/TNFSF13B/MALT1/TICAM1                                                                                                                                                                                  | 15 |
| RPS2    | 0.893969732 | 7.75E-229 | M2_TAM_KRAS_LILRA2 | Renal cell carcinoma                      | 0.00233447 | CDC42/CDKN1A/GRB2/HIF1A/KRAS/PAK1/PAK2/RAP1B/ELOB/TGFB1/RBX1                                                                                                                                                                                                              | 11 |
| BID     | 1.137839548 | 1.01E-228 | M2_TAM_KRAS_LILRA2 | Hepatitis C                               | 0.00239585 | BID/CDKN1A/CTNNB1/GRB2/EIF3E/IRF7/JAK1/KRAS/MX2/NFKB1/NFKBIA/OAS1/RXRA/YWHAB/YWHAZ/CFLAR/SOCS3/CYCS/TICAM1                                                                                                                                                                | 19 |
| FGR     | 0.889122117 | 1.71E-227 | M2_TAM_KRAS_LILRA2 | Rheumatoid arthritis                      | 0.00326755 | DQB1/IL1B/ITGAL/ITGB2/LTB/CCL20/TGFB1/TLR2/TNFSF13/ATP6V1G1/TCIRG1/TNFSF13B                                                                                                                                                                                               | 13 |
| CRIP1   | 1.201509272 | 2.91E-226 | M2_TAM_KRAS_LILRA2 | Colorectal cancer                         | 0.00470057 | AREG/RHOA/CDKN1A/CTNNB1/EREG/GRB2/KRAS/RAC2/RALB/TCF7L2/TGFB1/CYCS                                                                                                                                                                                                        | 12 |
| LIMD2   | 0.881019828 | 1.39E-225 | M2_TAM_KRAS_LILRA2 | Antigen processing and presentation       | 0.00615207 | B2M/CTSS/HLA-B/HLA-C/HLA-DQB1/HLA-E/HLA-F/HSPA8/PSME1/PSME2/IFI30                                                                                                                                                                                                         | 11 |
| IFITM3  | 1.622927227 | 3.48E-225 | M2_TAM_KRAS_LILRA2 | Measles                                   | 0.00827524 | BID/CDKN1B/HSPA8/IL1B/IRF7/JAK1/MSN/MX2/MYD88/NFKB1/NFKBIA/OAS1/TLR2/EIF3H/RACK1/CYCS                                                                                                                                                                                     | 16 |
| FPR2    | 0.553081416 | 9.05E-225 | M2_TAM_KRAS_LILRA2 | Focal adhesion                            | 0.00829283 | ACTB/ACTG1/BIRC3/RHOA/CDC42/CTNNB1/DIAPH1/FLNA/FYN/GRB2/PAK1/PAK2/PPP1CA/PPP1CB/PRKCB/RAC2/RAP1B/THBS1/TLN1/VASP/MYL12B                                                                                                                                                   | 21 |
| BTG1    | 1.328066123 | 3.41E-224 | M2_TAM_KRAS_LILRA2 | Malaria                                   | 0.00875185 | IL1B/ITGAL/ITGB2/MYD88/PECAM1/TGFB1/THBS1/TLR2                                                                                                                                                                                                                            | 8  |
| RPL30   | 0.82277999  | 9.82E-222 | M2_TAM_KRAS_LILRA2 | Graft-versus-host disease                 | 0.0111337  | CD86/HLA-B/HLA-C/HLA-DQB1/HLA-E/HLA-F/IL1B                                                                                                                                                                                                                                | 7  |

|          |             |           |                    |                                                           |            |                                                                                                                               |    |
|----------|-------------|-----------|--------------------|-----------------------------------------------------------|------------|-------------------------------------------------------------------------------------------------------------------------------|----|
| TESC     | 0.672015993 | 3.99E-215 | M2_TAM_KRAS_LILRA2 | Cellular senescence                                       | 0.01121622 | SLC25A5/SLC25A6/CDKN1A/HLA-B/HLA-C/HLA-E/HLA-F/KRAS/NBN/NFKB1/PPP1CA/PPP1CB/RRAS/TGFB1/VDAC2/RASSF5/CALML4                    | 17 |
| NAP1L1   | 1.239941304 | 9.96E-215 | M2_TAM_KRAS_LILRA2 | Type I diabetes mellitus                                  | 0.01263705 | CD86/HLA-B/HLA-C/HLA-DQB1/HLA-E/HLA-F/IL1B                                                                                    | 7  |
| CKB      | 0.605259768 | 4.14E-213 | M2_TAM_KRAS_LILRA2 | Cell adhesion molecules                                   | 0.01554178 | CD86/VCAN/HLA-B/HLA-C/HLA-DQB1/HLA-E/HLA-F/ICAM2/ICAM3/ITGAL/ITGB2/PECAM1/PTPRC/SELPLG/SPN/VSIR                               | 16 |
| CD55     | 0.923175736 | 3.35E-212 | M2_TAM_KRAS_LILRA2 | PD-L1 expression and PD-1 checkpoint pathway in cancer    | 0.0160919  | HIF1A/IFNGR2/JAK1/KRAS/MYD88/NFKB1/NFKBIA/PTPN6/TLR2/BATF3/TICAM1                                                             | 11 |
| SAMSN1   | 1.136388189 | 3.99E-212 | M2_TAM_KRAS_LILRA2 | Viral carcinogenesis                                      | 0.01881979 | RHOA/CDC42/CDKN1A/CDKN1B/GRB2/GTF2B/HLA-B/HLA-C/HLA-E/HLA-F/IRF7/JAK1/KRAS/LYN/NFKB1/NFKBIA/PKM/REL/YWHAB/YWHAZ               | 20 |
| S100A8   | 1.109502408 | 1.73E-211 | M2_TAM_KRAS_LILRA2 | T cell receptor signaling pathway                         | 0.02028968 | RHOA/CDC42/FYN/GRB2/KRAS/NFKB1/NFKBIA/PAK1/PAK2/PTPN6/PTPRC/MALT1                                                             | 12 |
| POU2F2   | 1.06775672  | 9.24E-211 | M2_TAM_KRAS_LILRA2 | Oxytocin signaling pathway                                | 0.02066874 | ACTB/ACTG1/RHOA/CDKN1A/EEF2/GNAI2/KRAS/MYL6/PIK3CG/PPP1CA/PPP1CB/PRKCB/RGS2/CAMK1/CAMKK2/CALML4                               | 16 |
| RPL34    | 0.813286989 | 9.71E-211 | M2_TAM_KRAS_LILRA2 | Parathyroid hormone synthesis, secretion and action       | 0.02322561 | RHOA/ARRB1/CDKN1A/GNAI2/JUND/NACA/PDE4B/PRKCB/RXRA/VDR/ARHGEF1/MAFB                                                           | 12 |
| RPS12    | 0.772932589 | 2.58E-210 | M2_TAM_KRAS_LILRA2 | Human T-cell leukemia virus 1 infection                   | 0.0234093  | SLC25A5/SLC25A6/B2M/TSP0/CDKN1A/HLA-B/HLA-C/HLA-DQB1/HLA-E/HLA-F/ITGAL/ITGB2/JAK1/KRAS/NFKB1/NFKBIA/RELB/SP1/TGFB1/TLN1/VDAC2 | 21 |
| CALHM6   | 0.973631014 | 8.26E-210 | M2_TAM_KRAS_LILRA2 | Allograft rejection                                       | 0.02347046 | CD86/HLA-B/HLA-C/HLA-DQB1/HLA-E/HLA-F                                                                                         | 6  |
| LILRA2   | 0.625129255 | 2.90E-209 | M2_TAM_KRAS_LILRA2 | Necroptosis                                               | 0.02699284 | SLC25A5/SLC25A6/BIRC3/BID/CASP1/CYBB/CYLD/FTH1/IFNGR2/IL1B/JAK1/VDAC2/CFLAR/PYCARD/NLRP3/TICAM1                               | 16 |
| S100A6   | 1.829682544 | 3.69E-209 | M2_TAM_KRAS_LILRA2 | Neomycin, kanamycin and gentamicin biosynthesis           | 0.03136183 | HK1/HK3                                                                                                                       | 2  |
| LTA4H    | 0.744526903 | 2.85E-206 | M2_TAM_KRAS_LILRA2 | Hepatitis B                                               | 0.03142351 | BID/CDKN1A/GRB2/IRF7/JAK1/KRAS/MYD88/NFKB1/NFKBIA/PRKCB/TGFB1/TLR2/YWHAB/YWHAZ/CYCS/TICAM1                                    | 16 |
| SAT1     | 1.084554716 | 1.26E-204 | M2_TAM_KRAS_LILRA2 | Ferroptosis                                               | 0.03293703 | CYBB/ACSL1/FTH1/SAT1/TFRC/VDAC2                                                                                               | 6  |
| AIF1     | 0.971222683 | 2.99E-204 | M2_TAM_KRAS_LILRA2 | Gastric acid secretion                                    | 0.03573687 | ACTB/ACTG1/ATP1A1/ATP1B3/GNAI2/HRH2/PRKCB/EZR/CALML4                                                                          | 9  |
| FFAR2    | 0.705103811 | 1.12E-203 | M2_TAM_KRAS_LILRA2 | Endocrine and other factor-regulated calcium reabsorption | 0.03641287 | AP2A1/ATP1A1/ATP1B3/ATP2B1/CLTB/PRKCB/VDR                                                                                     | 7  |
| PTGES    | 0.540086519 | 5.37E-203 | M2_TAM_KRAS_LILRA2 | Chagas disease                                            | 0.03954212 | GNA15/GNAI2/IFNGR2/IL1B/MYD88/NFKB1/NFKBIA/TGFB1/TLR2/CFLAR/TICAM1                                                            | 11 |
| RPL6     | 0.838260852 | 3.43E-202 | M2_TAM_KRAS_LILRA2 | Fructose and mannose metabolism                           | 0.04374922 | FBP1/HK1/HK3/PFKFB3/TP1                                                                                                       | 5  |
| LYN      | 1.114759857 | 6.62E-202 | M2_TAM_KRAS_LILRA2 | Tight junction                                            | 0.0438122  | ACTB/ACTG1/RHOA/CDC42/RAB8A/MSN/MYL6/VASP/EZR/WAS/ARPC3/ARPC1B/ACTR3/ACTR2/ARPC2/MYL12B                                       | 16 |
| EEF1A1   | 0.705649818 | 1.89E-201 | M2_TAM_KRAS_LILRA2 | Acute myeloid leukemia                                    | 0.04436917 | BCL2A1/GRB2/KRAS/NFKB1/RARA/SP1/TCF7L2/PIM2                                                                                   | 8  |
| TGM2     | 0.843867168 | 3.93E-201 | M2_TAM_KRAS_LILRA2 |                                                           |            |                                                                                                                               |    |
| RPS15    | 0.746482613 | 2.01E-199 | M2_TAM_KRAS_LILRA2 |                                                           |            |                                                                                                                               |    |
| LILRB2   | 1.075591256 | 1.14E-197 | M2_TAM_KRAS_LILRA2 |                                                           |            |                                                                                                                               |    |
| LILRA1   | 0.586746137 | 1.71E-196 | M2_TAM_KRAS_LILRA2 |                                                           |            |                                                                                                                               |    |
| CTSS     | 1.038421912 | 3.55E-196 | M2_TAM_KRAS_LILRA2 |                                                           |            |                                                                                                                               |    |
| FAM49A   | 0.842143863 | 3.73E-196 | M2_TAM_KRAS_LILRA2 |                                                           |            |                                                                                                                               |    |
| PRAM1    | 0.450376633 | 1.44E-195 | M2_TAM_KRAS_LILRA2 |                                                           |            |                                                                                                                               |    |
| SOD2     | 1.436122337 | 1.05E-194 | M2_TAM_KRAS_LILRA2 |                                                           |            |                                                                                                                               |    |
| B4GALT5  | 0.734324155 | 1.08E-194 | M2_TAM_KRAS_LILRA2 |                                                           |            |                                                                                                                               |    |
| LILRB3   | 0.595406195 | 7.43E-194 | M2_TAM_KRAS_LILRA2 |                                                           |            |                                                                                                                               |    |
| SPN      | 0.742355786 | 3.87E-193 | M2_TAM_KRAS_LILRA2 |                                                           |            |                                                                                                                               |    |
| RPS7     | 0.810227262 | 6.19E-193 | M2_TAM_KRAS_LILRA2 |                                                           |            |                                                                                                                               |    |
| RPS3     | 0.832451682 | 9.16E-193 | M2_TAM_KRAS_LILRA2 |                                                           |            |                                                                                                                               |    |
| RPL39    | 0.693215043 | 9.70E-193 | M2_TAM_KRAS_LILRA2 |                                                           |            |                                                                                                                               |    |
| EHD1     | 0.797614513 | 4.65E-192 | M2_TAM_KRAS_LILRA2 |                                                           |            |                                                                                                                               |    |
| CD44     | 0.989046114 | 1.30E-190 | M2_TAM_KRAS_LILRA2 |                                                           |            |                                                                                                                               |    |
| RPS10    | 0.835184088 | 7.16E-189 | M2_TAM_KRAS_LILRA2 |                                                           |            |                                                                                                                               |    |
| RPL7A    | 0.797604253 | 1.15E-188 | M2_TAM_KRAS_LILRA2 |                                                           |            |                                                                                                                               |    |
| EIF1     | 0.786096156 | 1.78E-188 | M2_TAM_KRAS_LILRA2 |                                                           |            |                                                                                                                               |    |
| TYMP     | 1.084291732 | 1.66E-186 | M2_TAM_KRAS_LILRA2 |                                                           |            |                                                                                                                               |    |
| RPL26    | 0.819238588 | 3.21E-186 | M2_TAM_KRAS_LILRA2 |                                                           |            |                                                                                                                               |    |
| RPS27A   | 0.755023464 | 4.43E-186 | M2_TAM_KRAS_LILRA2 |                                                           |            |                                                                                                                               |    |
| FLNA     | 0.901807372 | 3.14E-185 | M2_TAM_KRAS_LILRA2 |                                                           |            |                                                                                                                               |    |
| SLC11A1  | 0.515458932 | 5.16E-185 | M2_TAM_KRAS_LILRA2 |                                                           |            |                                                                                                                               |    |
| RPS15A   | 0.749683953 | 1.08E-184 | M2_TAM_KRAS_LILRA2 |                                                           |            |                                                                                                                               |    |
| RPS14    | 0.72094274  | 1.44E-184 | M2_TAM_KRAS_LILRA2 |                                                           |            |                                                                                                                               |    |
| RRAS     | 0.683686206 | 2.19E-184 | M2_TAM_KRAS_LILRA2 |                                                           |            |                                                                                                                               |    |
| OAZ1     | 0.721006343 | 8.61E-184 | M2_TAM_KRAS_LILRA2 |                                                           |            |                                                                                                                               |    |
| RPS27    | 0.770632919 | 2.17E-183 | M2_TAM_KRAS_LILRA2 |                                                           |            |                                                                                                                               |    |
| SERPINB9 | 1.069272802 | 6.30E-183 | M2_TAM_KRAS_LILRA2 |                                                           |            |                                                                                                                               |    |
| CHST2    | 0.512479677 | 8.81E-183 | M2_TAM_KRAS_LILRA2 |                                                           |            |                                                                                                                               |    |

|          |             |           |                    |
|----------|-------------|-----------|--------------------|
| RPS9     | 0.854618566 | 3.23E-182 | M2_TAM_KRAS_LILRA2 |
| SERPINB1 | 1.060791727 | 3.96E-181 | M2_TAM_KRAS_LILRA2 |
| SERPINA1 | 1.021376579 | 1.58E-179 | M2_TAM_KRAS_LILRA2 |
| PLAGL2   | 0.520256182 | 3.26E-179 | M2_TAM_KRAS_LILRA2 |
| IRAK3    | 0.611139432 | 1.60E-178 | M2_TAM_KRAS_LILRA2 |
| SIGLEC10 | 0.558594745 | 7.53E-177 | M2_TAM_KRAS_LILRA2 |
| RPS4X    | 0.786667746 | 1.14E-176 | M2_TAM_KRAS_LILRA2 |
| HCK      | 0.866086874 | 7.73E-174 | M2_TAM_KRAS_LILRA2 |
| ISG20    | 0.840230015 | 4.50E-173 | M2_TAM_KRAS_LILRA2 |
| CD79B    | 0.446180841 | 1.10E-172 | M2_TAM_KRAS_LILRA2 |
| TNFAIP6  | 0.760094512 | 9.36E-172 | M2_TAM_KRAS_LILRA2 |
| CDA      | 0.39948256  | 5.96E-171 | M2_TAM_KRAS_LILRA2 |
| RPS16    | 0.772652962 | 4.16E-169 | M2_TAM_KRAS_LILRA2 |
| RNF144B  | 0.891736416 | 1.09E-167 | M2_TAM_KRAS_LILRA2 |
| UBE2R2   | 0.760716601 | 2.64E-167 | M2_TAM_KRAS_LILRA2 |
| ATP2B1   | 0.941657798 | 5.26E-167 | M2_TAM_KRAS_LILRA2 |
| RPL10A   | 0.80722925  | 6.85E-167 | M2_TAM_KRAS_LILRA2 |
| PILRA    | 0.957894125 | 2.84E-164 | M2_TAM_KRAS_LILRA2 |
| RPS26    | 0.782344133 | 3.55E-164 | M2_TAM_KRAS_LILRA2 |
| GPBAR1   | 0.475533803 | 4.38E-160 | M2_TAM_KRAS_LILRA2 |
| RPS13    | 0.712837899 | 1.08E-159 | M2_TAM_KRAS_LILRA2 |
| CFD      | 1.188553195 | 2.82E-159 | M2_TAM_KRAS_LILRA2 |
| JPT1     | 0.974666533 | 5.00E-159 | M2_TAM_KRAS_LILRA2 |
| PRELID1  | 0.83727024  | 3.95E-158 | M2_TAM_KRAS_LILRA2 |
| VSIR     | 0.815127632 | 3.91E-157 | M2_TAM_KRAS_LILRA2 |
| CDKN1C   | 1.461086572 | 1.87E-156 | M2_TAM_KRAS_LILRA2 |
| ANPEP    | 0.505404695 | 5.32E-156 | M2_TAM_KRAS_LILRA2 |
| HIGD2A   | 0.82339683  | 3.07E-155 | M2_TAM_KRAS_LILRA2 |
| ICAM2    | 0.609482729 | 4.41E-155 | M2_TAM_KRAS_LILRA2 |
| NINJ1    | 1.020870178 | 1.40E-153 | M2_TAM_KRAS_LILRA2 |
| SLC25A6  | 0.825288963 | 1.86E-153 | M2_TAM_KRAS_LILRA2 |
| RIPOR2   | 0.429565227 | 1.86E-153 | M2_TAM_KRAS_LILRA2 |
| ICAM3    | 0.470756988 | 6.24E-152 | M2_TAM_KRAS_LILRA2 |
| RASSF5   | 0.669939155 | 2.95E-151 | M2_TAM_KRAS_LILRA2 |
| RPS23    | 0.656656195 | 9.00E-151 | M2_TAM_KRAS_LILRA2 |
| LILRB1   | 0.733843647 | 1.19E-149 | M2_TAM_KRAS_LILRA2 |
| RPL35A   | 0.684685904 | 3.56E-149 | M2_TAM_KRAS_LILRA2 |
| KYNU     | 0.634182268 | 1.14E-148 | M2_TAM_KRAS_LILRA2 |
| FCER1G   | 0.842869052 | 1.26E-147 | M2_TAM_KRAS_LILRA2 |
| RPL36A   | 0.70728819  | 1.28E-147 | M2_TAM_KRAS_LILRA2 |
| PPP1R17  | 0.417717033 | 8.09E-147 | M2_TAM_KRAS_LILRA2 |
| LSP1     | 0.796217537 | 1.45E-146 | M2_TAM_KRAS_LILRA2 |
| NRGN     | 0.342621507 | 1.63E-146 | M2_TAM_KRAS_LILRA2 |
| VAMP5    | 0.803178137 | 1.30E-145 | M2_TAM_KRAS_LILRA2 |
| PABPC1   | 0.709008982 | 6.38E-145 | M2_TAM_KRAS_LILRA2 |
| SRGN     | 0.780732305 | 5.59E-144 | M2_TAM_KRAS_LILRA2 |
| PSMB9    | 0.849842948 | 5.13E-143 | M2_TAM_KRAS_LILRA2 |
| ATP5MC2  | 0.734111959 | 5.73E-143 | M2_TAM_KRAS_LILRA2 |
| RPL13    | 0.63179973  | 1.27E-141 | M2_TAM_KRAS_LILRA2 |
| DUSP5    | 0.899490636 | 2.48E-141 | M2_TAM_KRAS_LILRA2 |
| CX3CR1   | 0.405283629 | 1.28E-139 | M2_TAM_KRAS_LILRA2 |
| RAP1B    | 0.886937485 | 2.14E-139 | M2_TAM_KRAS_LILRA2 |
| LFNG     | 0.675201092 | 2.28E-139 | M2_TAM_KRAS_LILRA2 |
| STX11    | 0.856169664 | 1.43E-138 | M2_TAM_KRAS_LILRA2 |
| CARD16   | 0.794991333 | 1.43E-138 | M2_TAM_KRAS_LILRA2 |
| ADA      | 0.498746544 | 3.34E-138 | M2_TAM_KRAS_LILRA2 |
| GPR35    | 0.507819797 | 1.10E-137 | M2_TAM_KRAS_LILRA2 |
| S100A9   | 0.943985851 | 1.34E-137 | M2_TAM_KRAS_LILRA2 |
| FAM110A  | 0.66635357  | 2.84E-136 | M2_TAM_KRAS_LILRA2 |
| HEIH     | 0.510219151 | 5.53E-136 | M2_TAM_KRAS_LILRA2 |
| PTPRC    | 0.936204327 | 1.34E-134 | M2_TAM_KRAS_LILRA2 |
| RPL19    | 0.566784914 | 1.98E-134 | M2_TAM_KRAS_LILRA2 |
| TCF7L2   | 0.79581256  | 3.48E-134 | M2_TAM_KRAS_LILRA2 |
| MYD88    | 0.546910464 | 4.37E-134 | M2_TAM_KRAS_LILRA2 |

|            |             |           |                    |
|------------|-------------|-----------|--------------------|
| DRAP1      | 0.713712197 | 5.15E-134 | M2_TAM_KRAS_LILRA2 |
| TKT        | 0.863684801 | 5.64E-133 | M2_TAM_KRAS_LILRA2 |
| BIN2       | 0.596326713 | 1.58E-132 | M2_TAM_KRAS_LILRA2 |
| RPL32      | 0.560727834 | 5.88E-132 | M2_TAM_KRAS_LILRA2 |
| TSPO       | 0.794672541 | 1.07E-131 | M2_TAM_KRAS_LILRA2 |
| C5AR1      | 0.919665271 | 9.76E-131 | M2_TAM_KRAS_LILRA2 |
| LYST       | 0.649715732 | 1.15E-130 | M2_TAM_KRAS_LILRA2 |
| CDH23      | 0.315632507 | 1.40E-130 | M2_TAM_KRAS_LILRA2 |
| VASP       | 0.717689241 | 6.02E-130 | M2_TAM_KRAS_LILRA2 |
| MBD2       | 0.69110209  | 8.34E-130 | M2_TAM_KRAS_LILRA2 |
| DDX21      | 0.731657398 | 7.28E-129 | M2_TAM_KRAS_LILRA2 |
| UBE2D1     | 0.678472316 | 2.03E-128 | M2_TAM_KRAS_LILRA2 |
| SLC43A2    | 0.682990569 | 5.35E-128 | M2_TAM_KRAS_LILRA2 |
| RPS28      | 0.589666655 | 2.08E-127 | M2_TAM_KRAS_LILRA2 |
| UNC119     | 0.52009907  | 2.89E-127 | M2_TAM_KRAS_LILRA2 |
| LYPD2      | 0.996810425 | 3.60E-127 | M2_TAM_KRAS_LILRA2 |
| LYZ        | 1.13875002  | 7.09E-127 | M2_TAM_KRAS_LILRA2 |
| PRKCB      | 0.608286453 | 1.93E-126 | M2_TAM_KRAS_LILRA2 |
| SLC7A7     | 0.564716825 | 3.47E-126 | M2_TAM_KRAS_LILRA2 |
| AP1S2      | 0.691490934 | 2.68E-125 | M2_TAM_KRAS_LILRA2 |
| TICAM1     | 0.489928484 | 2.96E-125 | M2_TAM_KRAS_LILRA2 |
| TREM1      | 0.498628275 | 3.30E-125 | M2_TAM_KRAS_LILRA2 |
| RPL29      | 0.611281796 | 5.95E-125 | M2_TAM_KRAS_LILRA2 |
| TNFRSF1B   | 0.77885965  | 2.46E-124 | M2_TAM_KRAS_LILRA2 |
| RPL14      | 0.595881526 | 2.79E-124 | M2_TAM_KRAS_LILRA2 |
| FGD4       | 0.510736565 | 2.10E-123 | M2_TAM_KRAS_LILRA2 |
| BASP1      | 0.935140304 | 4.54E-122 | M2_TAM_KRAS_LILRA2 |
| BCL3       | 0.624996957 | 2.33E-121 | M2_TAM_KRAS_LILRA2 |
| METRNL     | 0.815182523 | 7.65E-121 | M2_TAM_KRAS_LILRA2 |
| PSME2      | 0.797447767 | 7.20E-120 | M2_TAM_KRAS_LILRA2 |
| RIPK2      | 0.55346148  | 9.36E-120 | M2_TAM_KRAS_LILRA2 |
| EIF3K      | 0.686454871 | 1.40E-119 | M2_TAM_KRAS_LILRA2 |
| FBP1       | 0.567397898 | 1.11E-118 | M2_TAM_KRAS_LILRA2 |
| MNDA       | 0.559815393 | 1.94E-118 | M2_TAM_KRAS_LILRA2 |
| PTGIR      | 0.297032121 | 3.88E-118 | M2_TAM_KRAS_LILRA2 |
| RIN3       | 0.52566476  | 5.38E-118 | M2_TAM_KRAS_LILRA2 |
| PFDN5      | 0.599527709 | 8.89E-118 | M2_TAM_KRAS_LILRA2 |
| MTPN       | 0.691893943 | 1.18E-117 | M2_TAM_KRAS_LILRA2 |
| RPS3A      | 0.581078578 | 3.02E-117 | M2_TAM_KRAS_LILRA2 |
| C11orf21   | 0.283528305 | 3.63E-117 | M2_TAM_KRAS_LILRA2 |
| RPL5       | 0.658615901 | 4.80E-117 | M2_TAM_KRAS_LILRA2 |
| GPSM3      | 0.688639355 | 5.43E-117 | M2_TAM_KRAS_LILRA2 |
| VDR        | 0.259703339 | 5.70E-117 | M2_TAM_KRAS_LILRA2 |
| IRF7       | 0.660141446 | 6.47E-117 | M2_TAM_KRAS_LILRA2 |
| C20orf27   | 0.564714304 | 7.04E-117 | M2_TAM_KRAS_LILRA2 |
| AC026369.3 | 0.337118103 | 9.96E-117 | M2_TAM_KRAS_LILRA2 |
| RASGRP2    | 0.467917511 | 9.45E-116 | M2_TAM_KRAS_LILRA2 |
| TAF10      | 0.630222965 | 1.30E-115 | M2_TAM_KRAS_LILRA2 |
| ADORA2A    | 0.331850525 | 4.21E-114 | M2_TAM_KRAS_LILRA2 |
| IL3RA      | 0.35654878  | 7.66E-114 | M2_TAM_KRAS_LILRA2 |
| RPL24      | 0.573721539 | 1.07E-113 | M2_TAM_KRAS_LILRA2 |
| BACH1      | 0.547737935 | 1.10E-113 | M2_TAM_KRAS_LILRA2 |
| SVIL       | 0.30266517  | 3.87E-113 | M2_TAM_KRAS_LILRA2 |
| S1PR4      | 0.325376302 | 1.21E-112 | M2_TAM_KRAS_LILRA2 |
| CHST7      | 0.487921108 | 1.58E-112 | M2_TAM_KRAS_LILRA2 |
| ARPC1B     | 0.61438614  | 2.00E-112 | M2_TAM_KRAS_LILRA2 |
| LRRC25     | 0.609666848 | 1.28E-111 | M2_TAM_KRAS_LILRA2 |
| PLAUR      | 1.007155376 | 1.77E-111 | M2_TAM_KRAS_LILRA2 |
| PGK1       | 0.691623605 | 5.91E-111 | M2_TAM_KRAS_LILRA2 |
| HLA-B      | 0.542139848 | 1.81E-110 | M2_TAM_KRAS_LILRA2 |
| ARPC3      | 0.624231655 | 5.81E-110 | M2_TAM_KRAS_LILRA2 |
| RUNX3      | 0.547054143 | 2.45E-109 | M2_TAM_KRAS_LILRA2 |
| POLE4      | 0.499535887 | 3.04E-109 | M2_TAM_KRAS_LILRA2 |
| ARPC2      | 0.593514397 | 3.12E-109 | M2_TAM_KRAS_LILRA2 |

|            |             |           |                    |
|------------|-------------|-----------|--------------------|
| PSMB8      | 0.513035091 | 5.81E-109 | M2_TAM_KRAS_LILRA2 |
| CYBA       | 0.614694897 | 3.19E-108 | M2_TAM_KRAS_LILRA2 |
| CASP1      | 0.589153938 | 3.93E-108 | M2_TAM_KRAS_LILRA2 |
| PAG1       | 0.633604445 | 6.55E-108 | M2_TAM_KRAS_LILRA2 |
| CDKN2D     | 0.421063879 | 1.20E-107 | M2_TAM_KRAS_LILRA2 |
| ATP2B1-AS1 | 0.668855598 | 4.73E-107 | M2_TAM_KRAS_LILRA2 |
| LINC00877  | 0.351291678 | 6.40E-107 | M2_TAM_KRAS_LILRA2 |
| RPL4       | 0.6112259   | 2.46E-106 | M2_TAM_KRAS_LILRA2 |
| ABRACL     | 0.635083121 | 3.84E-106 | M2_TAM_KRAS_LILRA2 |
| UBA52      | 0.531298307 | 6.13E-106 | M2_TAM_KRAS_LILRA2 |
| NFIL3      | 0.445427656 | 6.38E-106 | M2_TAM_KRAS_LILRA2 |
| ACAA1      | 0.435279189 | 6.67E-106 | M2_TAM_KRAS_LILRA2 |
| SMCO4      | 0.473112433 | 9.30E-106 | M2_TAM_KRAS_LILRA2 |
| TCIRG1     | 0.482093116 | 1.96E-105 | M2_TAM_KRAS_LILRA2 |
| RNF149     | 0.613311928 | 3.46E-105 | M2_TAM_KRAS_LILRA2 |
| ADGRE2     | 0.527638885 | 4.98E-105 | M2_TAM_KRAS_LILRA2 |
| NOTCH2     | 0.405684357 | 1.11E-104 | M2_TAM_KRAS_LILRA2 |
| NCF2       | 0.564103422 | 1.83E-104 | M2_TAM_KRAS_LILRA2 |
| S100A11    | 0.639221444 | 4.33E-104 | M2_TAM_KRAS_LILRA2 |
| AGTRAP     | 0.473458121 | 4.58E-104 | M2_TAM_KRAS_LILRA2 |
| CAMK1      | 0.428959602 | 8.72E-104 | M2_TAM_KRAS_LILRA2 |
| HRH2       | 0.343486275 | 1.06E-103 | M2_TAM_KRAS_LILRA2 |
| VCAN       | 0.317974918 | 7.72E-103 | M2_TAM_KRAS_LILRA2 |
| GRK6       | 0.361462956 | 1.81E-102 | M2_TAM_KRAS_LILRA2 |
| PTPN6      | 0.693763949 | 3.21E-102 | M2_TAM_KRAS_LILRA2 |
| ACTB       | 0.62728926  | 3.38E-102 | M2_TAM_KRAS_LILRA2 |
| ATG3       | 0.623962796 | 1.04E-101 | M2_TAM_KRAS_LILRA2 |
| RACK1      | 0.546579067 | 1.34E-101 | M2_TAM_KRAS_LILRA2 |
| PTMA       | 0.479345653 | 8.93E-101 | M2_TAM_KRAS_LILRA2 |
| EEF1D      | 0.574163533 | 1.01E-100 | M2_TAM_KRAS_LILRA2 |
| RPSA       | 0.608320374 | 1.63E-99  | M2_TAM_KRAS_LILRA2 |
| HIC1       | 0.408974943 | 6.37E-99  | M2_TAM_KRAS_LILRA2 |
| MARCKSL1   | 0.453589955 | 9.30E-99  | M2_TAM_KRAS_LILRA2 |
| ZBTB7A     | 0.576880187 | 1.74E-98  | M2_TAM_KRAS_LILRA2 |
| CD300LF    | 0.340309406 | 1.25E-97  | M2_TAM_KRAS_LILRA2 |
| PGLS       | 0.613771036 | 7.55E-97  | M2_TAM_KRAS_LILRA2 |
| H3F3B      | 0.534666522 | 1.59E-96  | M2_TAM_KRAS_LILRA2 |
| HK3        | 0.340770073 | 3.75E-96  | M2_TAM_KRAS_LILRA2 |
| SPI1       | 0.699599129 | 4.23E-96  | M2_TAM_KRAS_LILRA2 |
| PIM2       | 0.397876525 | 8.39E-96  | M2_TAM_KRAS_LILRA2 |
| MXD1       | 0.544508424 | 9.39E-96  | M2_TAM_KRAS_LILRA2 |
| MAPKAPK3   | 0.392754921 | 1.50E-95  | M2_TAM_KRAS_LILRA2 |
| LIMS1      | 0.837523859 | 2.48E-95  | M2_TAM_KRAS_LILRA2 |
| CPPED1     | 0.445701225 | 5.87E-95  | M2_TAM_KRAS_LILRA2 |
| NBN        | 0.574044404 | 1.38E-94  | M2_TAM_KRAS_LILRA2 |
| FMNL1      | 0.482133278 | 3.17E-94  | M2_TAM_KRAS_LILRA2 |
| GSTP1      | 0.661069752 | 2.20E-93  | M2_TAM_KRAS_LILRA2 |
| EIF3F      | 0.550633876 | 3.53E-93  | M2_TAM_KRAS_LILRA2 |
| EIF3L      | 0.513487711 | 3.64E-93  | M2_TAM_KRAS_LILRA2 |
| PDE4B      | 0.557851514 | 3.89E-93  | M2_TAM_KRAS_LILRA2 |
| SYTL1      | 0.276296102 | 5.82E-93  | M2_TAM_KRAS_LILRA2 |
| TES        | 0.358435876 | 2.96E-92  | M2_TAM_KRAS_LILRA2 |
| SIDT2      | 0.361805983 | 8.31E-92  | M2_TAM_KRAS_LILRA2 |
| RPL15      | 0.493522031 | 8.48E-92  | M2_TAM_KRAS_LILRA2 |
| CYBB       | 0.625067308 | 1.16E-91  | M2_TAM_KRAS_LILRA2 |
| SNHG8      | 0.466360085 | 1.26E-91  | M2_TAM_KRAS_LILRA2 |
| RPS4Y1     | 0.606062976 | 1.93E-90  | M2_TAM_KRAS_LILRA2 |
| SRI        | 0.506461907 | 1.02E-88  | M2_TAM_KRAS_LILRA2 |
| GBP1       | 0.560990908 | 2.77E-88  | M2_TAM_KRAS_LILRA2 |
| TMPO       | 0.417464873 | 3.03E-87  | M2_TAM_KRAS_LILRA2 |
| SNN        | 0.487822338 | 3.81E-87  | M2_TAM_KRAS_LILRA2 |
| CYFIP2     | 0.272986927 | 6.09E-87  | M2_TAM_KRAS_LILRA2 |
| LSM7       | 0.479015095 | 2.15E-86  | M2_TAM_KRAS_LILRA2 |
| SSH2       | 0.353544142 | 4.47E-86  | M2_TAM_KRAS_LILRA2 |

|           |             |          |                    |
|-----------|-------------|----------|--------------------|
| ZNRD1     | 0.45273953  | 1.04E-85 | M2_TAM_KRAS_LILRA2 |
| RPS21     | 0.464506289 | 1.66E-85 | M2_TAM_KRAS_LILRA2 |
| PAPSS2    | 0.461106812 | 1.95E-85 | M2_TAM_KRAS_LILRA2 |
| PIK3CG    | 0.421660062 | 2.10E-85 | M2_TAM_KRAS_LILRA2 |
| RPL37     | 0.468995005 | 5.35E-85 | M2_TAM_KRAS_LILRA2 |
| THEMIS2   | 0.536360545 | 5.65E-85 | M2_TAM_KRAS_LILRA2 |
| CMTM6     | 0.564023443 | 6.57E-85 | M2_TAM_KRAS_LILRA2 |
| MTHFS     | 0.37396332  | 7.27E-85 | M2_TAM_KRAS_LILRA2 |
| ZFAS1     | 0.582823613 | 8.35E-85 | M2_TAM_KRAS_LILRA2 |
| PFN1      | 0.559393676 | 2.21E-84 | M2_TAM_KRAS_LILRA2 |
| SLC16A3   | 0.410663485 | 7.91E-84 | M2_TAM_KRAS_LILRA2 |
| TRAF3IP3  | 0.298034048 | 1.22E-83 | M2_TAM_KRAS_LILRA2 |
| BIRC3     | 0.746407587 | 4.71E-83 | M2_TAM_KRAS_LILRA2 |
| UPP1      | 0.510932413 | 4.86E-83 | M2_TAM_KRAS_LILRA2 |
| LRRFIP1   | 0.653696148 | 5.26E-83 | M2_TAM_KRAS_LILRA2 |
| RARA      | 0.383607918 | 7.19E-83 | M2_TAM_KRAS_LILRA2 |
| GMFG      | 0.571205155 | 8.26E-83 | M2_TAM_KRAS_LILRA2 |
| ZNF703    | 0.573003456 | 9.90E-83 | M2_TAM_KRAS_LILRA2 |
| TNIP1     | 0.44880778  | 1.46E-82 | M2_TAM_KRAS_LILRA2 |
| STX10     | 0.389745477 | 2.77E-82 | M2_TAM_KRAS_LILRA2 |
| POLD4     | 0.518461041 | 9.96E-82 | M2_TAM_KRAS_LILRA2 |
| JAML      | 0.419839091 | 1.92E-81 | M2_TAM_KRAS_LILRA2 |
| WTAP      | 0.56623433  | 2.17E-81 | M2_TAM_KRAS_LILRA2 |
| AMPD2     | 0.310417208 | 2.98E-81 | M2_TAM_KRAS_LILRA2 |
| GABARAPL1 | 0.424489277 | 3.21E-81 | M2_TAM_KRAS_LILRA2 |
| RPL21     | 0.488048301 | 5.32E-81 | M2_TAM_KRAS_LILRA2 |
| OLR1      | 0.55761043  | 1.10E-80 | M2_TAM_KRAS_LILRA2 |
| PSME1     | 0.553963357 | 1.33E-80 | M2_TAM_KRAS_LILRA2 |
| COX4I1    | 0.491883092 | 3.22E-80 | M2_TAM_KRAS_LILRA2 |
| OAS1      | 0.51338643  | 9.29E-80 | M2_TAM_KRAS_LILRA2 |
| SNRPB     | 0.456588677 | 1.23E-79 | M2_TAM_KRAS_LILRA2 |
| DIAPH1    | 0.326477722 | 1.33E-79 | M2_TAM_KRAS_LILRA2 |
| HLA-C     | 0.500470711 | 2.21E-79 | M2_TAM_KRAS_LILRA2 |
| IFITM1    | 0.365396688 | 3.56E-79 | M2_TAM_KRAS_LILRA2 |
| CALML4    | 0.325365379 | 3.08E-78 | M2_TAM_KRAS_LILRA2 |
| HLA-F     | 0.419782776 | 7.70E-78 | M2_TAM_KRAS_LILRA2 |
| WAS       | 0.447355404 | 1.05E-77 | M2_TAM_KRAS_LILRA2 |
| RXRA      | 0.451859104 | 1.19E-77 | M2_TAM_KRAS_LILRA2 |
| HLA-E     | 0.536288645 | 1.47E-77 | M2_TAM_KRAS_LILRA2 |
| ZNF385A   | 0.372213792 | 2.47E-77 | M2_TAM_KRAS_LILRA2 |
| PLXNC1    | 0.322040492 | 2.88E-77 | M2_TAM_KRAS_LILRA2 |
| NUP50     | 0.357453756 | 3.22E-77 | M2_TAM_KRAS_LILRA2 |
| TP11      | 0.532861764 | 3.75E-77 | M2_TAM_KRAS_LILRA2 |
| ATP1B3    | 0.667393688 | 3.82E-77 | M2_TAM_KRAS_LILRA2 |
| RPS5      | 0.495191356 | 3.85E-77 | M2_TAM_KRAS_LILRA2 |
| GRASP     | 0.415853573 | 4.02E-77 | M2_TAM_KRAS_LILRA2 |
| ITGAL     | 0.379858064 | 6.41E-77 | M2_TAM_KRAS_LILRA2 |
| RELB      | 0.39539309  | 7.10E-77 | M2_TAM_KRAS_LILRA2 |
| PYCARD    | 0.585644098 | 7.69E-77 | M2_TAM_KRAS_LILRA2 |
| CAMKK2    | 0.335726345 | 1.27E-76 | M2_TAM_KRAS_LILRA2 |
| CTNNB1    | 0.550020159 | 1.30E-76 | M2_TAM_KRAS_LILRA2 |
| RHOG      | 0.556383036 | 2.55E-76 | M2_TAM_KRAS_LILRA2 |
| HSBP1     | 0.59300968  | 4.46E-76 | M2_TAM_KRAS_LILRA2 |
| SLAMF7    | 0.547406662 | 4.62E-76 | M2_TAM_KRAS_LILRA2 |
| CCDC69    | 0.28795902  | 7.19E-76 | M2_TAM_KRAS_LILRA2 |
| RBM8A     | 0.489693785 | 1.58E-75 | M2_TAM_KRAS_LILRA2 |
| C1orf162  | 0.558901089 | 7.20E-75 | M2_TAM_KRAS_LILRA2 |
| DOCK8     | 0.399930894 | 9.21E-75 | M2_TAM_KRAS_LILRA2 |
| RPL12     | 0.396156115 | 1.62E-74 | M2_TAM_KRAS_LILRA2 |
| OSCAR     | 0.255162348 | 4.36E-74 | M2_TAM_KRAS_LILRA2 |
| CHD1      | 0.493308684 | 4.91E-74 | M2_TAM_KRAS_LILRA2 |
| UBE2J1    | 0.423892758 | 5.50E-74 | M2_TAM_KRAS_LILRA2 |
| CAPNS1    | 0.496239235 | 6.05E-74 | M2_TAM_KRAS_LILRA2 |
| MT-CO2    | 0.447735093 | 1.14E-73 | M2_TAM_KRAS_LILRA2 |

|            |             |          |                    |
|------------|-------------|----------|--------------------|
| DMXL2      | 0.418309039 | 1.32E-73 | M2_TAM_KRAS_LILRA2 |
| SEPTIN9    | 0.475298642 | 1.38E-73 | M2_TAM_KRAS_LILRA2 |
| PECAM1     | 0.531088432 | 1.53E-73 | M2_TAM_KRAS_LILRA2 |
| GPR132     | 0.312371814 | 1.89E-73 | M2_TAM_KRAS_LILRA2 |
| GSTK1      | 0.53874834  | 3.37E-73 | M2_TAM_KRAS_LILRA2 |
| NFAT5      | 0.316493017 | 6.74E-73 | M2_TAM_KRAS_LILRA2 |
| PGAM1      | 0.401954592 | 1.17E-72 | M2_TAM_KRAS_LILRA2 |
| SPATA13    | 0.26402315  | 1.68E-72 | M2_TAM_KRAS_LILRA2 |
| SLC25A37   | 0.359032789 | 9.81E-72 | M2_TAM_KRAS_LILRA2 |
| SLC25A3    | 0.511156361 | 1.18E-71 | M2_TAM_KRAS_LILRA2 |
| ARAP2      | 0.327712438 | 1.85E-71 | M2_TAM_KRAS_LILRA2 |
| PKN1       | 0.436489039 | 3.04E-71 | M2_TAM_KRAS_LILRA2 |
| PLD4       | 0.260007577 | 6.18E-71 | M2_TAM_KRAS_LILRA2 |
| PSMB10     | 0.47765436  | 6.31E-71 | M2_TAM_KRAS_LILRA2 |
| RILPL2     | 0.509512364 | 6.74E-71 | M2_TAM_KRAS_LILRA2 |
| CNIH4      | 0.369939975 | 7.24E-71 | M2_TAM_KRAS_LILRA2 |
| EMILIN2    | 0.434712431 | 8.42E-71 | M2_TAM_KRAS_LILRA2 |
| RPLP1      | 0.427321701 | 1.70E-70 | M2_TAM_KRAS_LILRA2 |
| PIK3AP1    | 0.519203757 | 3.98E-70 | M2_TAM_KRAS_LILRA2 |
| RPL7       | 0.50847215  | 7.06E-70 | M2_TAM_KRAS_LILRA2 |
| PTGER2     | 0.273791617 | 2.00E-69 | M2_TAM_KRAS_LILRA2 |
| GTF2B      | 0.421889248 | 2.96E-69 | M2_TAM_KRAS_LILRA2 |
| CCDC88C    | 0.255965631 | 3.86E-69 | M2_TAM_KRAS_LILRA2 |
| PSTPIP2    | 0.311463539 | 6.11E-69 | M2_TAM_KRAS_LILRA2 |
| DENND6B    | 0.263204186 | 6.41E-69 | M2_TAM_KRAS_LILRA2 |
| CCNI       | 0.512453452 | 9.74E-69 | M2_TAM_KRAS_LILRA2 |
| RASSF2     | 0.339253984 | 1.98E-68 | M2_TAM_KRAS_LILRA2 |
| AC090559.1 | 0.401405664 | 2.55E-68 | M2_TAM_KRAS_LILRA2 |
| CDKN1B     | 0.364459187 | 5.39E-68 | M2_TAM_KRAS_LILRA2 |
| MAFB       | 0.754896559 | 5.58E-68 | M2_TAM_KRAS_LILRA2 |
| PNPLA8     | 0.421333398 | 6.35E-68 | M2_TAM_KRAS_LILRA2 |
| SLC25A5    | 0.530117417 | 9.60E-68 | M2_TAM_KRAS_LILRA2 |
| ADK        | 0.267383835 | 1.61E-67 | M2_TAM_KRAS_LILRA2 |
| REL        | 0.591533428 | 2.46E-67 | M2_TAM_KRAS_LILRA2 |
| PSEN1      | 0.321980249 | 3.09E-67 | M2_TAM_KRAS_LILRA2 |
| ASGR1      | 0.285182727 | 3.33E-67 | M2_TAM_KRAS_LILRA2 |
| SUPT4H1    | 0.39222767  | 4.32E-67 | M2_TAM_KRAS_LILRA2 |
| SLA        | 0.558125332 | 4.93E-67 | M2_TAM_KRAS_LILRA2 |
| RAB10      | 0.466575061 | 5.05E-67 | M2_TAM_KRAS_LILRA2 |
| CHCHD2     | 0.436954584 | 7.42E-67 | M2_TAM_KRAS_LILRA2 |
| BATF3      | 0.361008659 | 1.50E-66 | M2_TAM_KRAS_LILRA2 |
| RPL23A     | 0.463772139 | 2.04E-66 | M2_TAM_KRAS_LILRA2 |
| PHF19      | 0.294542455 | 2.07E-66 | M2_TAM_KRAS_LILRA2 |
| SECTM1     | 0.372361403 | 3.55E-66 | M2_TAM_KRAS_LILRA2 |
| PPM1F      | 0.319351168 | 4.01E-66 | M2_TAM_KRAS_LILRA2 |
| THAP9-AS1  | 0.272998311 | 4.36E-66 | M2_TAM_KRAS_LILRA2 |
| GABARAP    | 0.43936802  | 4.93E-66 | M2_TAM_KRAS_LILRA2 |
| ITGB2      | 0.49983205  | 6.38E-66 | M2_TAM_KRAS_LILRA2 |
| SMDT1      | 0.444490365 | 7.38E-66 | M2_TAM_KRAS_LILRA2 |
| ADGRE5     | 0.438165036 | 8.42E-66 | M2_TAM_KRAS_LILRA2 |
| CLTB       | 0.384922561 | 1.05E-65 | M2_TAM_KRAS_LILRA2 |
| SNX20      | 0.258539533 | 1.82E-65 | M2_TAM_KRAS_LILRA2 |
| SP3        | 0.374387173 | 3.33E-65 | M2_TAM_KRAS_LILRA2 |
| COMMD6     | 0.467811476 | 3.89E-65 | M2_TAM_KRAS_LILRA2 |
| XRCC5      | 0.396910149 | 6.14E-65 | M2_TAM_KRAS_LILRA2 |
| RPL9       | 0.419319604 | 7.09E-65 | M2_TAM_KRAS_LILRA2 |
| RNH1       | 0.498610649 | 7.17E-65 | M2_TAM_KRAS_LILRA2 |
| RHOC       | 0.661246254 | 1.49E-64 | M2_TAM_KRAS_LILRA2 |
| RAC2       | 0.445447231 | 2.88E-64 | M2_TAM_KRAS_LILRA2 |
| RPS25      | 0.40663672  | 1.29E-63 | M2_TAM_KRAS_LILRA2 |
| TIMM17B    | 0.304634243 | 2.06E-63 | M2_TAM_KRAS_LILRA2 |
| LYSMD2     | 0.373359532 | 5.38E-63 | M2_TAM_KRAS_LILRA2 |
| ABI3       | 0.363043793 | 5.96E-63 | M2_TAM_KRAS_LILRA2 |
| C9orf72    | 0.350215919 | 6.55E-63 | M2_TAM_KRAS_LILRA2 |



|          |             |          |                    |
|----------|-------------|----------|--------------------|
| GDI2     | 0.458452056 | 1.81E-62 | M2_TAM_KRAS_LILRA2 |
| FCGR3A   | 0.615834859 | 2.32E-62 | M2_TAM_KRAS_LILRA2 |
| LTB      | 0.32801128  | 3.17E-62 | M2_TAM_KRAS_LILRA2 |
| C15orf39 | 0.279659857 | 6.01E-62 | M2_TAM_KRAS_LILRA2 |
| CARD19   | 0.343664497 | 1.44E-61 | M2_TAM_KRAS_LILRA2 |
| JUND     | 0.462484469 | 1.50E-61 | M2_TAM_KRAS_LILRA2 |
| SORL1    | 0.263659669 | 4.78E-61 | M2_TAM_KRAS_LILRA2 |
| UBXN1    | 0.386098181 | 5.52E-61 | M2_TAM_KRAS_LILRA2 |
| CSK      | 0.423634234 | 6.07E-61 | M2_TAM_KRAS_LILRA2 |
| RNF19B   | 0.347786175 | 2.43E-60 | M2_TAM_KRAS_LILRA2 |
| LRRK2    | 0.267378127 | 2.89E-60 | M2_TAM_KRAS_LILRA2 |
| DNAAF1   | 0.267249945 | 4.27E-60 | M2_TAM_KRAS_LILRA2 |
| NEDD9    | 0.258293307 | 4.73E-60 | M2_TAM_KRAS_LILRA2 |
| SNX10    | 0.398955863 | 1.09E-59 | M2_TAM_KRAS_LILRA2 |
| APOL3    | 0.262826093 | 1.16E-59 | M2_TAM_KRAS_LILRA2 |
| AP2A1    | 0.279823143 | 1.31E-59 | M2_TAM_KRAS_LILRA2 |
| CLEC7A   | 0.384832656 | 3.77E-59 | M2_TAM_KRAS_LILRA2 |
| MTF1     | 0.284020262 | 5.36E-59 | M2_TAM_KRAS_LILRA2 |
| PTX3     | 0.280099368 | 1.57E-58 | M2_TAM_KRAS_LILRA2 |
| PTPRE    | 0.473462026 | 1.70E-58 | M2_TAM_KRAS_LILRA2 |
| SH3BP1   | 0.311290437 | 2.01E-58 | M2_TAM_KRAS_LILRA2 |
| MIR22HG  | 0.336413368 | 2.10E-58 | M2_TAM_KRAS_LILRA2 |
| HDFG     | 0.372593278 | 2.46E-58 | M2_TAM_KRAS_LILRA2 |
| GPCPD1   | 0.376736146 | 2.82E-58 | M2_TAM_KRAS_LILRA2 |
| MX2      | 0.306386059 | 5.46E-58 | M2_TAM_KRAS_LILRA2 |
| RPS18    | 0.452875082 | 1.53E-57 | M2_TAM_KRAS_LILRA2 |
| SCLT1    | 0.273823511 | 1.83E-57 | M2_TAM_KRAS_LILRA2 |
| CASP4    | 0.379504179 | 1.94E-57 | M2_TAM_KRAS_LILRA2 |
| COX7B    | 0.43260302  | 5.27E-57 | M2_TAM_KRAS_LILRA2 |
| ATP5MG   | 0.417510043 | 5.72E-57 | M2_TAM_KRAS_LILRA2 |
| CYCS     | 0.503264133 | 1.20E-56 | M2_TAM_KRAS_LILRA2 |
| SNX18    | 0.419744371 | 1.37E-56 | M2_TAM_KRAS_LILRA2 |
| SRSF9    | 0.39193598  | 1.48E-56 | M2_TAM_KRAS_LILRA2 |
| SLC2A3   | 0.54491708  | 2.75E-56 | M2_TAM_KRAS_LILRA2 |
| SEC11A   | 0.432513326 | 4.73E-56 | M2_TAM_KRAS_LILRA2 |
| PKM      | 0.407187815 | 5.91E-56 | M2_TAM_KRAS_LILRA2 |
| CDC42EP3 | 0.400024602 | 2.56E-55 | M2_TAM_KRAS_LILRA2 |
| FAM89B   | 0.334809558 | 2.97E-55 | M2_TAM_KRAS_LILRA2 |
| PPA1     | 0.282327469 | 4.88E-55 | M2_TAM_KRAS_LILRA2 |
| GNG2     | 0.489274913 | 8.22E-55 | M2_TAM_KRAS_LILRA2 |
| ARRB1    | 0.330655273 | 1.30E-54 | M2_TAM_KRAS_LILRA2 |
| IQSEC1   | 0.317981131 | 3.58E-54 | M2_TAM_KRAS_LILRA2 |
| NUMB     | 0.31654311  | 3.60E-54 | M2_TAM_KRAS_LILRA2 |
| RPL22    | 0.374995855 | 4.28E-54 | M2_TAM_KRAS_LILRA2 |
| TRAF4    | 0.268335725 | 6.34E-54 | M2_TAM_KRAS_LILRA2 |
| NAAA     | 0.297399625 | 6.58E-54 | M2_TAM_KRAS_LILRA2 |
| ACTR3    | 0.43148248  | 7.49E-54 | M2_TAM_KRAS_LILRA2 |
| PPP1CA   | 0.410583322 | 2.32E-53 | M2_TAM_KRAS_LILRA2 |
| CD47     | 0.3817235   | 2.46E-53 | M2_TAM_KRAS_LILRA2 |
| NXT1     | 0.324451466 | 4.78E-53 | M2_TAM_KRAS_LILRA2 |
| GSTO1    | 0.429363325 | 6.67E-53 | M2_TAM_KRAS_LILRA2 |
| RAB5IF   | 0.337540434 | 6.91E-53 | M2_TAM_KRAS_LILRA2 |
| EIF3H    | 0.377289949 | 8.45E-53 | M2_TAM_KRAS_LILRA2 |
| NDUFS7   | 0.377631452 | 8.55E-53 | M2_TAM_KRAS_LILRA2 |
| PRR13    | 0.414825057 | 1.03E-52 | M2_TAM_KRAS_LILRA2 |
| EIF6     | 0.302819444 | 1.22E-52 | M2_TAM_KRAS_LILRA2 |
| HES4     | 0.48842266  | 1.99E-52 | M2_TAM_KRAS_LILRA2 |
| WASF2    | 0.455845608 | 3.61E-52 | M2_TAM_KRAS_LILRA2 |
| PTPN1    | 0.360915844 | 7.49E-52 | M2_TAM_KRAS_LILRA2 |
| ARHGDI8  | 0.471629678 | 8.15E-52 | M2_TAM_KRAS_LILRA2 |
| PDLIM5   | 0.322690708 | 9.25E-52 | M2_TAM_KRAS_LILRA2 |
| FYN      | 0.260579917 | 1.38E-51 | M2_TAM_KRAS_LILRA2 |
| DENND10  | 0.29740751  | 2.08E-51 | M2_TAM_KRAS_LILRA2 |
| ERGIC1   | 0.33002663  | 4.67E-51 | M2_TAM_KRAS_LILRA2 |

|          |             |          |                    |
|----------|-------------|----------|--------------------|
| RPL17    | 0.38084858  | 7.44E-51 | M2_TAM_KRAS_LILRA2 |
| ABHD5    | 0.419075781 | 1.25E-50 | M2_TAM_KRAS_LILRA2 |
| SCIMP    | 0.313102296 | 1.37E-50 | M2_TAM_KRAS_LILRA2 |
| AREG     | 1.02737587  | 2.10E-50 | M2_TAM_KRAS_LILRA2 |
| EIF4E2   | 0.30103661  | 2.12E-50 | M2_TAM_KRAS_LILRA2 |
| BAZ1A    | 0.409179317 | 3.31E-50 | M2_TAM_KRAS_LILRA2 |
| LSM6     | 0.298742279 | 3.32E-50 | M2_TAM_KRAS_LILRA2 |
| UQCRC1   | 0.331144172 | 3.44E-50 | M2_TAM_KRAS_LILRA2 |
| BTF3     | 0.373756102 | 3.75E-50 | M2_TAM_KRAS_LILRA2 |
| MGAT1    | 0.440772056 | 4.27E-50 | M2_TAM_KRAS_LILRA2 |
| PPM1N    | 0.256093905 | 4.92E-50 | M2_TAM_KRAS_LILRA2 |
| DOCK2    | 0.33675367  | 8.81E-50 | M2_TAM_KRAS_LILRA2 |
| MDH2     | 0.352041267 | 1.42E-49 | M2_TAM_KRAS_LILRA2 |
| RALB     | 0.275804628 | 1.78E-49 | M2_TAM_KRAS_LILRA2 |
| OXR1     | 0.287912822 | 1.83E-49 | M2_TAM_KRAS_LILRA2 |
| VDAC2    | 0.351958642 | 3.29E-49 | M2_TAM_KRAS_LILRA2 |
| GCA      | 0.304838011 | 3.52E-49 | M2_TAM_KRAS_LILRA2 |
| RNASSET2 | 0.448415116 | 4.43E-49 | M2_TAM_KRAS_LILRA2 |
| RNF141   | 0.320384294 | 1.14E-48 | M2_TAM_KRAS_LILRA2 |
| EEF1B2   | 0.398468321 | 1.26E-48 | M2_TAM_KRAS_LILRA2 |
| GNG5     | 0.407995324 | 1.82E-48 | M2_TAM_KRAS_LILRA2 |
| DENND5A  | 0.29276578  | 2.18E-48 | M2_TAM_KRAS_LILRA2 |
| PLSCR1   | 0.408264508 | 2.55E-48 | M2_TAM_KRAS_LILRA2 |
| GHITM    | 0.3140675   | 2.76E-48 | M2_TAM_KRAS_LILRA2 |
| LMO2     | 0.336587707 | 3.03E-48 | M2_TAM_KRAS_LILRA2 |
| RABGEF1  | 0.250544115 | 3.23E-48 | M2_TAM_KRAS_LILRA2 |
| RIOK3    | 0.333118254 | 3.58E-48 | M2_TAM_KRAS_LILRA2 |
| PLAAT4   | 0.341717576 | 4.56E-48 | M2_TAM_KRAS_LILRA2 |
| ELF1     | 0.37590508  | 7.09E-48 | M2_TAM_KRAS_LILRA2 |
| CYC1     | 0.296228546 | 7.47E-48 | M2_TAM_KRAS_LILRA2 |
| RPS6     | 0.405114157 | 8.84E-48 | M2_TAM_KRAS_LILRA2 |
| MKRN1    | 0.269012119 | 1.35E-47 | M2_TAM_KRAS_LILRA2 |
| AOAH     | 0.318400129 | 1.71E-47 | M2_TAM_KRAS_LILRA2 |
| RELT     | 0.278171919 | 1.98E-47 | M2_TAM_KRAS_LILRA2 |
| SMCHD1   | 0.298414265 | 2.17E-47 | M2_TAM_KRAS_LILRA2 |
| C17orf49 | 0.350745122 | 2.20E-47 | M2_TAM_KRAS_LILRA2 |
| MOB3A    | 0.298853518 | 3.78E-47 | M2_TAM_KRAS_LILRA2 |
| LACTB    | 0.323033164 | 4.24E-47 | M2_TAM_KRAS_LILRA2 |
| SH3BGRL3 | 0.320854307 | 4.47E-47 | M2_TAM_KRAS_LILRA2 |
| SNRPG    | 0.342102086 | 4.56E-47 | M2_TAM_KRAS_LILRA2 |
| PCMT1    | 0.306278123 | 5.50E-47 | M2_TAM_KRAS_LILRA2 |
| PHB2     | 0.313561649 | 8.25E-47 | M2_TAM_KRAS_LILRA2 |
| NDUFA12  | 0.312726077 | 1.11E-46 | M2_TAM_KRAS_LILRA2 |
| CFL1     | 0.340485513 | 1.16E-46 | M2_TAM_KRAS_LILRA2 |
| RGS18    | 0.257528687 | 1.22E-46 | M2_TAM_KRAS_LILRA2 |
| FKBP1A   | 0.392726881 | 1.23E-46 | M2_TAM_KRAS_LILRA2 |
| IDH3G    | 0.276087545 | 1.35E-46 | M2_TAM_KRAS_LILRA2 |
| ACOT9    | 0.30606018  | 1.38E-46 | M2_TAM_KRAS_LILRA2 |
| CUX1     | 0.299711497 | 1.95E-46 | M2_TAM_KRAS_LILRA2 |
| PTPN2    | 0.268477448 | 1.97E-46 | M2_TAM_KRAS_LILRA2 |
| FXYD5    | 0.442978689 | 2.53E-46 | M2_TAM_KRAS_LILRA2 |
| NLRP3    | 0.404187603 | 3.89E-46 | M2_TAM_KRAS_LILRA2 |
| MOB1A    | 0.34299764  | 5.41E-46 | M2_TAM_KRAS_LILRA2 |
| SKIL     | 0.3296591   | 6.15E-46 | M2_TAM_KRAS_LILRA2 |
| CCT5     | 0.306288002 | 7.11E-46 | M2_TAM_KRAS_LILRA2 |
| TRIM38   | 0.318947513 | 8.21E-46 | M2_TAM_KRAS_LILRA2 |
| GK       | 0.42362247  | 9.78E-46 | M2_TAM_KRAS_LILRA2 |
| ACTR2    | 0.397662773 | 1.86E-45 | M2_TAM_KRAS_LILRA2 |
| PLEK     | 0.571233044 | 2.88E-45 | M2_TAM_KRAS_LILRA2 |
| SNHG15   | 0.258019486 | 2.88E-45 | M2_TAM_KRAS_LILRA2 |
| ARHGEF1  | 0.284227253 | 3.49E-45 | M2_TAM_KRAS_LILRA2 |
| GLTP     | 0.284699313 | 4.39E-45 | M2_TAM_KRAS_LILRA2 |
| MTHFD2   | 0.289234685 | 4.86E-45 | M2_TAM_KRAS_LILRA2 |
| NDUFB5   | 0.325045155 | 5.18E-45 | M2_TAM_KRAS_LILRA2 |

|           |             |          |                    |
|-----------|-------------|----------|--------------------|
| MALT1     | 0.286243158 | 5.98E-45 | M2_TAM_KRAS_LILRA2 |
| TSC22D3   | 0.370782035 | 6.05E-45 | M2_TAM_KRAS_LILRA2 |
| EZR       | 0.434616465 | 6.35E-45 | M2_TAM_KRAS_LILRA2 |
| SYF2      | 0.303980632 | 7.27E-45 | M2_TAM_KRAS_LILRA2 |
| SF3B2     | 0.33305192  | 7.94E-45 | M2_TAM_KRAS_LILRA2 |
| GRB2      | 0.362750771 | 9.74E-45 | M2_TAM_KRAS_LILRA2 |
| ARL4A     | 0.34080361  | 1.09E-44 | M2_TAM_KRAS_LILRA2 |
| CHST15    | 0.306466245 | 1.17E-44 | M2_TAM_KRAS_LILRA2 |
| PSMA6     | 0.324063723 | 1.38E-44 | M2_TAM_KRAS_LILRA2 |
| DNAJC7    | 0.271584003 | 1.68E-44 | M2_TAM_KRAS_LILRA2 |
| TNFSF13B  | 0.383032175 | 1.77E-44 | M2_TAM_KRAS_LILRA2 |
| COX7C     | 0.367803909 | 2.33E-44 | M2_TAM_KRAS_LILRA2 |
| HIST3H2A  | 0.281850177 | 2.46E-44 | M2_TAM_KRAS_LILRA2 |
| MRPS24    | 0.332130826 | 2.72E-44 | M2_TAM_KRAS_LILRA2 |
| FOSL2     | 0.399624522 | 3.08E-44 | M2_TAM_KRAS_LILRA2 |
| PPP4R2    | 0.265563275 | 3.50E-44 | M2_TAM_KRAS_LILRA2 |
| IL10RA    | 0.343271987 | 3.60E-44 | M2_TAM_KRAS_LILRA2 |
| TFRC      | 0.491199993 | 3.95E-44 | M2_TAM_KRAS_LILRA2 |
| HK1       | 0.263535892 | 4.50E-44 | M2_TAM_KRAS_LILRA2 |
| CNN2      | 0.305216429 | 5.40E-44 | M2_TAM_KRAS_LILRA2 |
| UXT       | 0.350289507 | 5.98E-44 | M2_TAM_KRAS_LILRA2 |
| SELPLG    | 0.305971228 | 7.99E-44 | M2_TAM_KRAS_LILRA2 |
| UBE2B     | 0.350071727 | 9.66E-44 | M2_TAM_KRAS_LILRA2 |
| SYAP1     | 0.445410152 | 1.11E-43 | M2_TAM_KRAS_LILRA2 |
| RPL22L1   | 0.359570251 | 1.17E-43 | M2_TAM_KRAS_LILRA2 |
| B2M       | 0.307547782 | 1.98E-43 | M2_TAM_KRAS_LILRA2 |
| LPCAT1    | 0.348265781 | 2.96E-43 | M2_TAM_KRAS_LILRA2 |
| LINC01578 | 0.305758323 | 4.15E-43 | M2_TAM_KRAS_LILRA2 |
| TLR2      | 0.291411595 | 7.32E-43 | M2_TAM_KRAS_LILRA2 |
| EFHD2     | 0.385802921 | 9.68E-43 | M2_TAM_KRAS_LILRA2 |
| GRAMD1A   | 0.28968877  | 9.90E-43 | M2_TAM_KRAS_LILRA2 |
| SEC14L1   | 0.353014111 | 9.90E-43 | M2_TAM_KRAS_LILRA2 |
| UTRN      | 0.302901525 | 1.03E-42 | M2_TAM_KRAS_LILRA2 |
| LY6E      | 0.440783949 | 1.09E-42 | M2_TAM_KRAS_LILRA2 |
| PNRC1     | 0.466381772 | 1.14E-42 | M2_TAM_KRAS_LILRA2 |
| OSER1     | 0.305579075 | 1.32E-42 | M2_TAM_KRAS_LILRA2 |
| UBE2L6    | 0.331289518 | 1.55E-42 | M2_TAM_KRAS_LILRA2 |
| DNAJA1    | 0.509876627 | 1.92E-42 | M2_TAM_KRAS_LILRA2 |
| OTUB1     | 0.266864238 | 2.42E-42 | M2_TAM_KRAS_LILRA2 |
| CLNS1A    | 0.257636135 | 2.51E-42 | M2_TAM_KRAS_LILRA2 |
| FGL2      | 0.378677876 | 3.11E-42 | M2_TAM_KRAS_LILRA2 |
| MYL6      | 0.314602991 | 3.11E-42 | M2_TAM_KRAS_LILRA2 |
| PIM3      | 0.371375928 | 3.41E-42 | M2_TAM_KRAS_LILRA2 |
| TET2      | 0.258153828 | 4.79E-42 | M2_TAM_KRAS_LILRA2 |
| NFKB1     | 0.403670545 | 6.32E-42 | M2_TAM_KRAS_LILRA2 |
| RPS29     | 0.384627943 | 1.13E-41 | M2_TAM_KRAS_LILRA2 |
| LAMTOR4   | 0.389871644 | 1.21E-41 | M2_TAM_KRAS_LILRA2 |
| PSMB3     | 0.339850175 | 1.50E-41 | M2_TAM_KRAS_LILRA2 |
| WBP1L     | 0.274492795 | 1.60E-41 | M2_TAM_KRAS_LILRA2 |
| COX7A2    | 0.356039591 | 1.97E-41 | M2_TAM_KRAS_LILRA2 |
| ARF5      | 0.307183247 | 2.81E-41 | M2_TAM_KRAS_LILRA2 |
| NRARP     | 0.35888692  | 3.25E-41 | M2_TAM_KRAS_LILRA2 |
| LCP1      | 0.408327717 | 3.47E-41 | M2_TAM_KRAS_LILRA2 |
| NDUFA13   | 0.345053248 | 4.09E-41 | M2_TAM_KRAS_LILRA2 |
| C16orf72  | 0.268513078 | 4.49E-41 | M2_TAM_KRAS_LILRA2 |
| CCT8      | 0.269332937 | 4.50E-41 | M2_TAM_KRAS_LILRA2 |
| STK10     | 0.277908197 | 5.43E-41 | M2_TAM_KRAS_LILRA2 |
| CERT1     | 0.275124552 | 5.91E-41 | M2_TAM_KRAS_LILRA2 |
| PAK1      | 0.317627119 | 5.92E-41 | M2_TAM_KRAS_LILRA2 |
| DBNL      | 0.279910792 | 8.90E-41 | M2_TAM_KRAS_LILRA2 |
| TBC1D1    | 0.271248602 | 9.87E-41 | M2_TAM_KRAS_LILRA2 |
| POLR1D    | 0.303568002 | 1.05E-40 | M2_TAM_KRAS_LILRA2 |
| COX5B     | 0.350164905 | 1.40E-40 | M2_TAM_KRAS_LILRA2 |
| SMAP2     | 0.321202351 | 1.76E-40 | M2_TAM_KRAS_LILRA2 |

|         |             |          |                    |
|---------|-------------|----------|--------------------|
| GBP2    | 0.334432625 | 2.43E-40 | M2_TAM_KRAS_LILRA2 |
| CST3    | 0.418078242 | 3.93E-40 | M2_TAM_KRAS_LILRA2 |
| TBCB    | 0.293696814 | 5.11E-40 | M2_TAM_KRAS_LILRA2 |
| EVI2B   | 0.36313469  | 7.14E-40 | M2_TAM_KRAS_LILRA2 |
| CD300A  | 0.286320495 | 8.45E-40 | M2_TAM_KRAS_LILRA2 |
| EIF4G2  | 0.366240141 | 1.85E-39 | M2_TAM_KRAS_LILRA2 |
| APBB1IP | 0.30565127  | 2.00E-39 | M2_TAM_KRAS_LILRA2 |
| IL1B    | 1.161417455 | 2.71E-39 | M2_TAM_KRAS_LILRA2 |
| SLU7    | 0.251995913 | 4.07E-39 | M2_TAM_KRAS_LILRA2 |
| TLN1    | 0.389629535 | 4.12E-39 | M2_TAM_KRAS_LILRA2 |
| PMVK    | 0.254150258 | 4.86E-39 | M2_TAM_KRAS_LILRA2 |
| WDR1    | 0.301864965 | 8.60E-39 | M2_TAM_KRAS_LILRA2 |
| HBP1    | 0.251779023 | 8.98E-39 | M2_TAM_KRAS_LILRA2 |
| MYO1F   | 0.308404886 | 9.24E-39 | M2_TAM_KRAS_LILRA2 |
| VPS35   | 0.293288453 | 1.04E-38 | M2_TAM_KRAS_LILRA2 |
| PSMA2   | 0.265084268 | 1.82E-38 | M2_TAM_KRAS_LILRA2 |
| PPP1CB  | 0.337784306 | 2.83E-38 | M2_TAM_KRAS_LILRA2 |
| TNFSF13 | 0.27279775  | 4.63E-38 | M2_TAM_KRAS_LILRA2 |
| SLC31A2 | 0.279169297 | 4.67E-38 | M2_TAM_KRAS_LILRA2 |
| MICOS10 | 0.334337302 | 5.77E-38 | M2_TAM_KRAS_LILRA2 |
| AKIRIN2 | 0.301679785 | 6.39E-38 | M2_TAM_KRAS_LILRA2 |
| RTRAF   | 0.288988038 | 7.06E-38 | M2_TAM_KRAS_LILRA2 |
| TRIR    | 0.338870671 | 8.58E-38 | M2_TAM_KRAS_LILRA2 |
| EVL     | 0.293072103 | 1.38E-37 | M2_TAM_KRAS_LILRA2 |
| ARRDC1  | 0.252685757 | 1.62E-37 | M2_TAM_KRAS_LILRA2 |
| ENY2    | 0.337771471 | 2.05E-37 | M2_TAM_KRAS_LILRA2 |
| PFDN1   | 0.27568163  | 2.12E-37 | M2_TAM_KRAS_LILRA2 |
| CIB1    | 0.286311549 | 3.22E-37 | M2_TAM_KRAS_LILRA2 |
| VMP1    | 0.348988542 | 9.39E-37 | M2_TAM_KRAS_LILRA2 |
| HMG2    | 0.302819444 | 1.06E-36 | M2_TAM_KRAS_LILRA2 |
| GNA15   | 0.278407778 | 1.08E-36 | M2_TAM_KRAS_LILRA2 |
| TOB2    | 0.270581146 | 1.54E-36 | M2_TAM_KRAS_LILRA2 |
| KRAS    | 0.258633482 | 1.83E-36 | M2_TAM_KRAS_LILRA2 |
| THBS1   | 0.526219855 | 1.85E-36 | M2_TAM_KRAS_LILRA2 |
| SH3BP2  | 0.283775026 | 2.38E-36 | M2_TAM_KRAS_LILRA2 |
| RGS19   | 0.327925948 | 2.41E-36 | M2_TAM_KRAS_LILRA2 |
| UQCRFS1 | 0.273578182 | 3.02E-36 | M2_TAM_KRAS_LILRA2 |
| VPS29   | 0.333695453 | 3.85E-36 | M2_TAM_KRAS_LILRA2 |
| RPLP2   | 0.293398871 | 3.96E-36 | M2_TAM_KRAS_LILRA2 |
| CDKN1A  | 0.411496617 | 4.56E-36 | M2_TAM_KRAS_LILRA2 |
| SP110   | 0.282596755 | 6.98E-36 | M2_TAM_KRAS_LILRA2 |
| EHBP1L1 | 0.28620561  | 2.12E-35 | M2_TAM_KRAS_LILRA2 |
| GNB2    | 0.348480362 | 4.22E-35 | M2_TAM_KRAS_LILRA2 |
| PFKFB3  | 0.319041731 | 5.14E-35 | M2_TAM_KRAS_LILRA2 |
| RAB8A   | 0.262790502 | 5.24E-35 | M2_TAM_KRAS_LILRA2 |
| RPS11   | 0.360945385 | 6.06E-35 | M2_TAM_KRAS_LILRA2 |
| EIF5A   | 0.274780225 | 1.10E-34 | M2_TAM_KRAS_LILRA2 |
| MSN     | 0.342720183 | 1.99E-34 | M2_TAM_KRAS_LILRA2 |
| TSPAN14 | 0.291224306 | 2.04E-34 | M2_TAM_KRAS_LILRA2 |
| TOMM6   | 0.279293209 | 2.32E-34 | M2_TAM_KRAS_LILRA2 |
| RBX1    | 0.303453706 | 2.75E-34 | M2_TAM_KRAS_LILRA2 |
| ADRM1   | 0.255289595 | 3.87E-34 | M2_TAM_KRAS_LILRA2 |
| SIAH2   | 0.252099687 | 6.24E-34 | M2_TAM_KRAS_LILRA2 |
| ATP5PO  | 0.306213791 | 1.03E-33 | M2_TAM_KRAS_LILRA2 |
| ATP5F1A | 0.287818881 | 1.08E-33 | M2_TAM_KRAS_LILRA2 |
| ZNF706  | 0.301335953 | 1.49E-33 | M2_TAM_KRAS_LILRA2 |
| TMSB10  | 0.281326158 | 1.58E-33 | M2_TAM_KRAS_LILRA2 |
| MYL12B  | 0.329035705 | 1.71E-33 | M2_TAM_KRAS_LILRA2 |
| RBM4    | 0.251715308 | 1.76E-33 | M2_TAM_KRAS_LILRA2 |
| YWHAH   | 0.311106805 | 2.24E-33 | M2_TAM_KRAS_LILRA2 |
| EEF2    | 0.334075579 | 3.81E-33 | M2_TAM_KRAS_LILRA2 |
| SYNGR2  | 0.323023015 | 4.26E-33 | M2_TAM_KRAS_LILRA2 |
| PLEKHO1 | 0.346437047 | 4.47E-33 | M2_TAM_KRAS_LILRA2 |
| PSMA4   | 0.253249156 | 4.72E-33 | M2_TAM_KRAS_LILRA2 |

|           |             |          |                    |
|-----------|-------------|----------|--------------------|
| CYTH1     | 0.28061324  | 5.40E-33 | M2_TAM_KRAS_LILRA2 |
| SPCS1     | 0.269157277 | 6.19E-33 | M2_TAM_KRAS_LILRA2 |
| CMTM7     | 0.254289334 | 9.57E-33 | M2_TAM_KRAS_LILRA2 |
| ACAP2     | 0.26929166  | 1.02E-32 | M2_TAM_KRAS_LILRA2 |
| EEF1G     | 0.335720103 | 1.75E-32 | M2_TAM_KRAS_LILRA2 |
| SNHG5     | 0.287772726 | 2.96E-32 | M2_TAM_KRAS_LILRA2 |
| ATP5F1B   | 0.293691059 | 3.16E-32 | M2_TAM_KRAS_LILRA2 |
| AVPI1     | 0.279786588 | 3.62E-32 | M2_TAM_KRAS_LILRA2 |
| HLA-DQB1  | 0.336178456 | 7.35E-32 | M2_TAM_KRAS_LILRA2 |
| ZEB2      | 0.42898406  | 9.22E-32 | M2_TAM_KRAS_LILRA2 |
| PLK3      | 0.275965963 | 9.86E-32 | M2_TAM_KRAS_LILRA2 |
| TMOD3     | 0.250988274 | 1.13E-31 | M2_TAM_KRAS_LILRA2 |
| GBP4      | 0.281752026 | 1.17E-31 | M2_TAM_KRAS_LILRA2 |
| RNASEK    | 0.291107906 | 1.17E-31 | M2_TAM_KRAS_LILRA2 |
| NAA38     | 0.284134881 | 1.29E-31 | M2_TAM_KRAS_LILRA2 |
| RAB20     | 0.318350239 | 1.30E-31 | M2_TAM_KRAS_LILRA2 |
| ATP1A1    | 0.307106803 | 1.33E-31 | M2_TAM_KRAS_LILRA2 |
| ATP5PB    | 0.273929827 | 1.58E-31 | M2_TAM_KRAS_LILRA2 |
| CEBPB     | 0.387516294 | 1.76E-31 | M2_TAM_KRAS_LILRA2 |
| EIF3E     | 0.309126723 | 2.19E-31 | M2_TAM_KRAS_LILRA2 |
| MIR3945HG | 0.361953437 | 2.57E-31 | M2_TAM_KRAS_LILRA2 |
| TGFB1     | 0.291239386 | 2.75E-31 | M2_TAM_KRAS_LILRA2 |
| CYLD      | 0.254456889 | 3.39E-31 | M2_TAM_KRAS_LILRA2 |
| TBXAS1    | 0.269776608 | 6.21E-31 | M2_TAM_KRAS_LILRA2 |
| DDIT4     | 0.389104353 | 1.09E-30 | M2_TAM_KRAS_LILRA2 |
| ATP5F1D   | 0.317008633 | 2.39E-30 | M2_TAM_KRAS_LILRA2 |
| PAK2      | 0.265195361 | 2.54E-30 | M2_TAM_KRAS_LILRA2 |
| CDC42     | 0.302819444 | 2.61E-30 | M2_TAM_KRAS_LILRA2 |
| CCL20     | 0.683808142 | 3.20E-30 | M2_TAM_KRAS_LILRA2 |
| TOP1      | 0.250065406 | 8.58E-30 | M2_TAM_KRAS_LILRA2 |
| ACSL1     | 0.381382021 | 1.24E-29 | M2_TAM_KRAS_LILRA2 |
| COX5A     | 0.286085663 | 1.81E-29 | M2_TAM_KRAS_LILRA2 |
| GRINA     | 0.305462089 | 2.06E-29 | M2_TAM_KRAS_LILRA2 |
| CAPZA1    | 0.278999247 | 2.52E-29 | M2_TAM_KRAS_LILRA2 |
| COX6A1    | 0.30866852  | 6.09E-29 | M2_TAM_KRAS_LILRA2 |
| HIF1A     | 0.340577768 | 1.25E-28 | M2_TAM_KRAS_LILRA2 |
| TMBIM4    | 0.292764055 | 1.73E-28 | M2_TAM_KRAS_LILRA2 |
| SOCS3     | 0.257937987 | 1.88E-28 | M2_TAM_KRAS_LILRA2 |
| REEP5     | 0.275067809 | 3.13E-28 | M2_TAM_KRAS_LILRA2 |
| GNS       | 0.286507689 | 3.53E-28 | M2_TAM_KRAS_LILRA2 |
| COX6B1    | 0.275541086 | 3.53E-28 | M2_TAM_KRAS_LILRA2 |
| H2AFY     | 0.281506547 | 3.78E-28 | M2_TAM_KRAS_LILRA2 |
| RPL3      | 0.319213703 | 4.70E-28 | M2_TAM_KRAS_LILRA2 |
| EIF1B     | 0.377623283 | 6.19E-28 | M2_TAM_KRAS_LILRA2 |
| GNAI2     | 0.285812163 | 1.08E-27 | M2_TAM_KRAS_LILRA2 |
| COX8A     | 0.285691133 | 1.47E-27 | M2_TAM_KRAS_LILRA2 |
| CAST      | 0.28756736  | 2.16E-27 | M2_TAM_KRAS_LILRA2 |
| ELOB      | 0.305564115 | 2.34E-27 | M2_TAM_KRAS_LILRA2 |
| DDX5      | 0.296652016 | 2.50E-27 | M2_TAM_KRAS_LILRA2 |
| GLIPR1    | 0.261503913 | 4.26E-27 | M2_TAM_KRAS_LILRA2 |
| CHCHD10   | 0.305525443 | 4.67E-27 | M2_TAM_KRAS_LILRA2 |
| WAC       | 0.289361438 | 1.10E-26 | M2_TAM_KRAS_LILRA2 |
| ALKBH7    | 0.257083467 | 1.35E-26 | M2_TAM_KRAS_LILRA2 |
| COPE      | 0.250994221 | 1.47E-26 | M2_TAM_KRAS_LILRA2 |
| HNRNPC    | 0.286259221 | 2.44E-26 | M2_TAM_KRAS_LILRA2 |
| APRT      | 0.26847165  | 4.63E-26 | M2_TAM_KRAS_LILRA2 |
| CCRL2     | 0.254358071 | 4.78E-26 | M2_TAM_KRAS_LILRA2 |
| SH3BGR1   | 0.295023671 | 6.70E-26 | M2_TAM_KRAS_LILRA2 |
| CTSH      | 0.267371614 | 8.84E-26 | M2_TAM_KRAS_LILRA2 |
| BRK1      | 0.25533778  | 1.11E-25 | M2_TAM_KRAS_LILRA2 |
| EIF3A     | 0.280707413 | 1.14E-25 | M2_TAM_KRAS_LILRA2 |
| NFKBIZ    | 0.461675686 | 1.80E-25 | M2_TAM_KRAS_LILRA2 |
| ARHGAP30  | 0.250843992 | 2.12E-25 | M2_TAM_KRAS_LILRA2 |
| NOP53     | 0.250218633 | 2.61E-25 | M2_TAM_KRAS_LILRA2 |

|          |             |            |                    |
|----------|-------------|------------|--------------------|
| IL10RB   | 0.258829876 | 2.72E-25   | M2_TAM_KRAS_LILRA2 |
| UBC      | 0.294107633 | 4.30E-25   | M2_TAM_KRAS_LILRA2 |
| HSPA8    | 0.2795157   | 4.61E-25   | M2_TAM_KRAS_LILRA2 |
| WDR83OS  | 0.263351534 | 9.46E-25   | M2_TAM_KRAS_LILRA2 |
| CD86     | 0.290194551 | 9.63E-25   | M2_TAM_KRAS_LILRA2 |
| RHOA     | 0.256483431 | 1.41E-24   | M2_TAM_KRAS_LILRA2 |
| JAK1     | 0.267258098 | 2.88E-24   | M2_TAM_KRAS_LILRA2 |
| RPLP0    | 0.369938343 | 3.95E-24   | M2_TAM_KRAS_LILRA2 |
| ARL6IP4  | 0.2658709   | 9.95E-24   | M2_TAM_KRAS_LILRA2 |
| RGS2     | 0.338153453 | 1.08E-23   | M2_TAM_KRAS_LILRA2 |
| UQCRB    | 0.257250291 | 1.45E-23   | M2_TAM_KRAS_LILRA2 |
| CAP1     | 0.2761758   | 2.47E-23   | M2_TAM_KRAS_LILRA2 |
| ATP6V1G1 | 0.252089862 | 1.51E-22   | M2_TAM_KRAS_LILRA2 |
| IFNGR2   | 0.25799644  | 1.72E-22   | M2_TAM_KRAS_LILRA2 |
| C15orf48 | 0.659206343 | 5.29E-22   | M2_TAM_KRAS_LILRA2 |
| SNHG29   | 0.266754935 | 6.19E-22   | M2_TAM_KRAS_LILRA2 |
| TMEM176B | 0.285763233 | 7.19E-22   | M2_TAM_KRAS_LILRA2 |
| ACTG1    | 0.279266336 | 8.17E-22   | M2_TAM_KRAS_LILRA2 |
| DRAM1    | 0.277986413 | 9.18E-21   | M2_TAM_KRAS_LILRA2 |
| PPDPF    | 0.268515311 | 9.42E-21   | M2_TAM_KRAS_LILRA2 |
| FYB1     | 0.280799422 | 1.57E-20   | M2_TAM_KRAS_LILRA2 |
| H2AFZ    | 0.269516029 | 1.64E-20   | M2_TAM_KRAS_LILRA2 |
| INSIG1   | 0.351482346 | 1.73E-20   | M2_TAM_KRAS_LILRA2 |
| SELENOK  | 0.462585186 | 2.60E-20   | M2_TAM_KRAS_LILRA2 |
| NOP10    | 0.258025025 | 2.81E-20   | M2_TAM_KRAS_LILRA2 |
| NEAT1    | 0.369389677 | 3.03E-20   | M2_TAM_KRAS_LILRA2 |
| YWHAZ    | 0.260517397 | 2.33E-19   | M2_TAM_KRAS_LILRA2 |
| PPIF     | 0.3627099   | 2.13E-18   | M2_TAM_KRAS_LILRA2 |
| UCP2     | 0.275434384 | 1.06E-17   | M2_TAM_KRAS_LILRA2 |
| RPL23    | 0.260425746 | 2.09E-17   | M2_TAM_KRAS_LILRA2 |
| S100A10  | 0.342174356 | 6.74E-17   | M2_TAM_KRAS_LILRA2 |
| CFLAR    | 0.271938887 | 6.54E-15   | M2_TAM_KRAS_LILRA2 |
| TWISTNB  | 0.358047134 | 1.87E-14   | M2_TAM_KRAS_LILRA2 |
| MARCKS   | 0.411834103 | 1.59E-13   | M2_TAM_KRAS_LILRA2 |
| SOD1     | 0.351962113 | 9.00E-10   | M2_TAM_KRAS_LILRA2 |
| IRF1     | 0.329652991 | 1.59E-09   | M2_TAM_KRAS_LILRA2 |
| CEBPD    | 0.450750032 | 5.98E-07   | M2_TAM_KRAS_LILRA2 |
| CXCR4    | 0.258930861 | 1.15E-05   | M2_TAM_KRAS_LILRA2 |
| ISG15    | 0.251921024 | 1.22E-05   | M2_TAM_KRAS_LILRA2 |
| TNFAIP2  | 0.268194586 | 7.94E-05   | M2_TAM_KRAS_LILRA2 |
| NFKBIA   | 0.40993877  | 0.00031427 | M2_TAM_KRAS_LILRA2 |

#### h.M2\_TAM\_EBI3

| Gene symbol | avg_log2FC  | p_val_adj | Upregulated group | Description                         | pvalue   | geneID                                                                                                                                                        | Count |
|-------------|-------------|-----------|-------------------|-------------------------------------|----------|---------------------------------------------------------------------------------------------------------------------------------------------------------------|-------|
| C1QB        | 1.32629806  | 1.06E-137 | M2_TAM_EBI3       | Lysosome                            | 5.77E-21 | ACP5/ASAH1/SCARB2/CD63/CD68/CTSC/TPP1/CTSB/CTSD/CTSH/CTSL/CTSS/CTSZ/FUCA1/GAA/LAMP1/LAMP2/LIPA/MAN2B1/PPT1/LGMN/PSAP/LAPTM5/NPC2                              | 24    |
| C1QC        | 1.292648102 | 5.68E-122 | M2_TAM_EBI3       | Antigen processing and presentation | 2.72E-19 | B2M/CANX/CD4/CD74/CTSB/CTSL/CTSS/HLA-A/HLA-DMA/HLA-DMB/HLA-DOA/HLA-DPA1/HLA-DPB1/HLA-DQA1/HLA-DQB1/HLA-DRA/HLA-DRB1/HLA-DRB5/LGMN                             | 19    |
| HLA-DRB5    | 1.129039136 | 3.81E-117 | M2_TAM_EBI3       | Phagosome                           | 3.15E-18 | CANX/CD14/CTSL/CTSS/CYBA/CYBB/FCGR1A/FCGR3A/HLA-A/HLA-DMA/HLA-DMB/HLA-DOA/HLA-DPA1/HLA-DPB1/HLA-DQA1/HLA-DQB1/HLA-DRA/HLA-DRB1/HLA-DRB5/LAMP1/LAMP2/MRC1/MSR1 | 23    |
| HLA-DRA     | 1.035493106 | 1.28E-110 | M2_TAM_EBI3       | Tuberculosis                        | 2.37E-14 | CD14/CD74/CTSD/CTSS/FCGR1A/FCGR3A/HLA-DMA/HLA-DMB/HLA-DOA/HLA-DPA1/HLA-DPB1/HLA-DQA1/HLA-DQB1/HLA-DRA/HLA-DRB1/HLA-DRB5/IFNGR1/IL18/LAMP1/LAMP2/MRC1          | 21    |
| CD74        | 0.942540281 | 1.61E-109 | M2_TAM_EBI3       | Leishmaniasis                       | 7.31E-14 | CYBA/CYBB/FCGR1A/FCGR3A/HLA-DMA/HLA-DMB/HLA-DOA/HLA-DPA1/HLA-DPB1/HLA-DQA1/HLA-DQB1/HLA-DRA/HLA-DRB1/HLA-DRB5/IFNGR1                                          | 15    |
| HLA-DPA1    | 1.08215077  | 7.41E-109 | M2_TAM_EBI3       | Staphylococcus aureus infection     | 1.34E-13 | C1QA/C1QB/C1QC/FCGR1A/FCGR3A/FPR3/HLA-DMA/HLA-DMB/HLA-DOA/HLA-DPA1/HLA-DPB1/HLA-DQA1/HLA-DQB1/HLA-DRA/HLA-DRB1/HLA-DRB5                                       | 16    |
| C1QA        | 1.061568068 | 3.76E-108 | M2_TAM_EBI3       | Hematopoietic cell lineage          | 2.21E-13 | CD4/CD9/CD14/CD59/CSF1R/FCGR1A/HLA-DMA/HLA-DMB/HLA-DOA/HLA-DPA1/HLA-DPB1/HLA-DQA1/HLA-DQB1/HLA-DRA/HLA-DRB1/HLA-DRB5                                          | 16    |

|          |             |           |             |                                                               |            |                                                                                                                  |    |
|----------|-------------|-----------|-------------|---------------------------------------------------------------|------------|------------------------------------------------------------------------------------------------------------------|----|
| HLA-DRB1 | 1.24907961  | 6.47E-102 | M2_TAM_EBI3 | Allograft rejection                                           | 1.68E-12   | HLA-A/HLA-DMA/HLA-DMB/HLA-DOA/HLA-DPA1/HLA-DPB1/HLA-DQA1/HLA-DQB1/HLA-DRA/HLA-DRB1/HLA-DRB5                      | 11 |
| HLA-DPB1 | 1.03115815  | 3.54E-101 | M2_TAM_EBI3 | Asthma                                                        | 5.31E-12   | HLA-DMA/HLA-DMB/HLA-DOA/HLA-DPA1/HLA-DPB1/HLA-DQA1/HLA-DQB1/HLA-DRA/HLA-DRB1/HLA-DRB5                            | 10 |
| HLA-DQA1 | 1.191362769 | 1.30E-95  | M2_TAM_EBI3 | Graft-versus-host disease                                     | 5.71E-12   | HLA-A/HLA-DMA/HLA-DMB/HLA-DOA/HLA-DPA1/HLA-DPB1/HLA-DQA1/HLA-DQB1/HLA-DRA/HLA-DRB1/HLA-DRB5                      | 11 |
| LIPA     | 1.129423082 | 7.04E-92  | M2_TAM_EBI3 | Type I diabetes mellitus                                      | 7.58E-12   | HLA-A/HLA-DMA/HLA-DMB/HLA-DOA/HLA-DPA1/HLA-DPB1/HLA-DQA1/HLA-DQB1/HLA-DRA/HLA-DRB1/HLA-DRB5                      | 11 |
| HLA-DMA  | 0.764614075 | 4.95E-60  | M2_TAM_EBI3 | Rheumatoid arthritis                                          | 2.11E-11   | ACP5/CTSL/HLA-DMA/HLA-DMB/HLA-DOA/HLA-DPA1/HLA-DPB1/HLA-DQA1/HLA-DQB1/HLA-DRA/HLA-DRB1/HLA-DRB5/IL18/CXCL12      | 14 |
| FCGRT    | 0.70335831  | 2.75E-59  | M2_TAM_EBI3 | Intestinal immune network for IgA production                  | 3.59E-11   | HLA-DMA/HLA-DMB/HLA-DOA/HLA-DPA1/HLA-DPB1/HLA-DQA1/HLA-DQB1/HLA-DRA/HLA-DRB1/HLA-DRB5/CXCL12                     | 11 |
| CST3     | 0.636970116 | 6.19E-57  | M2_TAM_EBI3 | Inflammatory bowel disease                                    | 5.17E-11   | HLA-DMA/HLA-DMB/HLA-DOA/HLA-DPA1/HLA-DPB1/HLA-DQA1/HLA-DQB1/HLA-DRA/HLA-DRB1/HLA-DRB5/IFNGR1/IL18                | 12 |
| MS4A6A   | 0.792486099 | 7.45E-57  | M2_TAM_EBI3 | Autoimmune thyroid disease                                    | 8.97E-11   | HLA-A/HLA-DMA/HLA-DMB/HLA-DOA/HLA-DPA1/HLA-DPB1/HLA-DQA1/HLA-DQB1/HLA-DRA/HLA-DRB1/HLA-DRB5                      | 11 |
| APOE     | 1.401104596 | 6.61E-56  | M2_TAM_EBI3 | Systemic lupus erythematosus                                  | 3.69E-10   | C1QA/C1QB/C1QC/FCGR3A/HLA-DMA/HLA-DMB/HLA-DOA/HLA-DPA1/HLA-DPB1/HLA-DQA1/HLA-DQB1/HLA-DRA/HLA-DRB1/HLA-DRB5      | 15 |
| HLA-DQB1 | 0.926437319 | 4.60E-55  | M2_TAM_EBI3 | Viral myocarditis                                             | 3.72E-10   | HLA-A/HLA-DMA/HLA-DMB/HLA-DOA/HLA-DPA1/HLA-DPB1/HLA-DQA1/HLA-DQB1/HLA-DRA/HLA-DRB1/HLA-DRB5                      | 11 |
| CPVL     | 0.845759601 | 1.50E-53  | M2_TAM_EBI3 | Cell adhesion molecules                                       | 1.35E-09   | ALCAM/CD4/HLA-A/HLA-DMA/HLA-DMB/HLA-DOA/HLA-DPA1/HLA-DPB1/HLA-DQA1/HLA-DQB1/HLA-DRA/HLA-DRB1/HLA-DRB5/VCAM1/SDC3 | 15 |
| CD81     | 0.716474874 | 1.63E-51  | M2_TAM_EBI3 | Th17 cell differentiation                                     | 2.01E-09   | CD4/HLA-DMA/HLA-DMB/HLA-DOA/HLA-DPA1/HLA-DPB1/HLA-DQA1/HLA-DQB1/HLA-DRA/HLA-DRB1/HLA-DRB5/IFNGR1/EBI3            | 13 |
| MS4A7    | 0.717599451 | 4.15E-51  | M2_TAM_EBI3 | Th1 and Th2 cell differentiation                              | 3.42E-09   | CD4/HLA-DMA/HLA-DMB/HLA-DOA/HLA-DPA1/HLA-DPB1/HLA-DQA1/HLA-DQB1/HLA-DRA/HLA-DRB1/HLA-DRB5/IFNGR1                 | 12 |
| EBI3     | 0.534779286 | 2.17E-47  | M2_TAM_EBI3 | Toxoplasmosis                                                 | 3.32E-08   | HLA-DMA/HLA-DMB/HLA-DOA/HLA-DPA1/HLA-DPB1/HLA-DQA1/HLA-DQB1/HLA-DRA/HLA-DRB1/HLA-DRB5/IFNGR1/LY96                | 12 |
| CD5L     | 1.06168014  | 4.05E-46  | M2_TAM_EBI3 | Human T-cell leukemia virus 1 infection                       | 2.98E-07   | B2M/CANX/CD4/HLA-A/HLA-DMA/HLA-DMB/HLA-DOA/HLA-DPA1/HLA-DPB1/HLA-DQA1/HLA-DQB1/HLA-DRA/HLA-DRB1/HLA-DRB5/NRP1    | 15 |
| SELENOP  | 0.788830179 | 9.00E-44  | M2_TAM_EBI3 | Epstein-Barr virus infection                                  | 5.63E-07   | B2M/HLA-A/HLA-DMA/HLA-DMB/HLA-DOA/HLA-DPA1/HLA-DPB1/HLA-DQA1/HLA-DQB1/HLA-DRA/HLA-DRB1/HLA-DRB5/GADD45B/VIM      | 14 |
| AXL      | 0.46322384  | 8.24E-43  | M2_TAM_EBI3 | Influenza A                                                   | 3.37E-06   | HLA-DMA/HLA-DMB/HLA-DOA/HLA-DPA1/HLA-DPB1/HLA-DQA1/HLA-DQB1/HLA-DRA/HLA-DRB1/HLA-DRB5/IFNGR1/IL18                | 12 |
| CD163    | 0.72417247  | 3.52E-42  | M2_TAM_EBI3 | Osteoclast differentiation                                    | 5.95E-05   | ACP5/CSF1R/CYBA/FCGR1A/FCGR3A/IFNGR1/TYROBP/LILRB5/TREM2                                                         | 9  |
| CD63     | 0.61196207  | 7.94E-41  | M2_TAM_EBI3 | Apoptosis                                                     | 0.00052549 | CTSC/CTSB/CTSD/CTSH/CTSL/CTSS/CTSS/CTSS/GADD45B                                                                  | 8  |
| LGMN     | 0.749060868 | 2.15E-40  | M2_TAM_EBI3 | Cholesterol metabolism                                        | 0.00056836 | APOC1/APOE/LIPA/LRP1/NPC2                                                                                        | 5  |
| HLA-DMB  | 0.547464825 | 2.44E-39  | M2_TAM_EBI3 | Pertussis                                                     | 0.00057535 | C1QA/C1QB/C1QC/CD14/IRF8/LY96                                                                                    | 6  |
| MS4A4A   | 0.622863766 | 3.34E-39  | M2_TAM_EBI3 | Complement and coagulation cascades                           | 0.00104214 | A2M/C1QA/C1QB/C1QC/CD59/SIG4                                                                                     | 6  |
| FOLR2    | 0.667073515 | 4.30E-39  | M2_TAM_EBI3 | Malaria                                                       | 0.00471168 | CD81/IL18/LRP1/VCAM1                                                                                             | 4  |
| ITM2B    | 0.527122147 | 6.29E-39  | M2_TAM_EBI3 | Riboflavin metabolism                                         | 0.00492238 | ACP5/BLVRB                                                                                                       | 2  |
| SLCO2B1  | 0.484690263 | 2.99E-36  | M2_TAM_EBI3 | Herpes simplex virus 1 infection                              | 0.00735413 | B2M/CD74/HLA-A/HLA-DMA/HLA-DMB/HLA-DOA/HLA-DPA1/HLA-DPB1/HLA-DQA1/HLA-DQB1/HLA-DRA/HLA-DRB1/HLA-DRB5/IFNGR1      | 14 |
| IGSF6    | 0.737164093 | 4.08E-36  | M2_TAM_EBI3 | Alcoholic liver disease                                       | 0.01304562 | C1QA/C1QB/C1QC/CD14/SCD/LY96                                                                                     | 6  |
| VCAM1    | 0.792569315 | 7.40E-36  | M2_TAM_EBI3 | NF-kappa B signaling pathway                                  | 0.0137952  | CD14/GADD45B/CXCL12/VCAM1/LY96                                                                                   | 5  |
| CD68     | 0.528515856 | 9.34E-36  | M2_TAM_EBI3 | Ferroptosis                                                   | 0.01822613 | CYBB/FTL/SLC40A1                                                                                                 | 3  |
| SLC40A1  | 0.692089117 | 6.99E-32  | M2_TAM_EBI3 | PPAR signaling pathway                                        | 0.01918415 | FABP4/FABP5/SCD/NR1H3                                                                                            | 4  |
| CREG1    | 0.534134806 | 1.57E-31  | M2_TAM_EBI3 | Other glycan degradation                                      | 0.02460696 | FUCA1/MAN2B1                                                                                                     | 2  |
| VSIG4    | 0.511435248 | 2.14E-31  | M2_TAM_EBI3 | Sphingolipid metabolism                                       | 0.02912965 | ASAH1/PSAP/JUGCG                                                                                                 | 3  |
| RNASET2  | 0.574860282 | 5.52E-31  | M2_TAM_EBI3 | Salivary secretion                                            | 0.03829949 | ATP1B1/CST3/KCNMA1/LYZ                                                                                           | 4  |
| A2M      | 0.555711341 | 8.81E-31  | M2_TAM_EBI3 | Autophagy - animal                                            | 0.0437847  | CTSB/CTSD/CTSL/LAMP1/LAMP2                                                                                       | 5  |
| PLD3     | 0.605357922 | 2.05E-30  | M2_TAM_EBI3 | Viral protein interaction with cytokine and cytokine receptor | 0.04788566 | CSF1R/IL18/CCL18/CXCL12                                                                                          | 4  |
| NPC2     | 0.390450041 | 4.81E-30  | M2_TAM_EBI3 | Mineral absorption                                            | 0.04861857 | ATP1B1/FTL/SLC40A1                                                                                               | 3  |
| B2M      | 0.372294446 | 1.39E-29  | M2_TAM_EBI3 | Cytokine-cytokine receptor interaction                        | 0.04875932 | CD4/CSF1R/IFNGR1/IL18/CCL18/CXCL12/EBI3/CXCL16                                                                   | 8  |
| CTSB     | 0.552762022 | 3.07E-28  | M2_TAM_EBI3 |                                                               |            |                                                                                                                  |    |
| PSAP     | 0.478107719 | 3.43E-27  | M2_TAM_EBI3 |                                                               |            |                                                                                                                  |    |
| FCGR3A   | 0.561333026 | 4.04E-27  | M2_TAM_EBI3 |                                                               |            |                                                                                                                  |    |
| CD302    | 0.404228153 | 5.65E-27  | M2_TAM_EBI3 |                                                               |            |                                                                                                                  |    |
| IL18     | 0.476647226 | 6.47E-27  | M2_TAM_EBI3 |                                                               |            |                                                                                                                  |    |
| TYROBP   | 0.389238046 | 2.13E-26  | M2_TAM_EBI3 |                                                               |            |                                                                                                                  |    |
| GRN      | 0.505762557 | 6.14E-26  | M2_TAM_EBI3 |                                                               |            |                                                                                                                  |    |
| FEZ2     | 0.317963173 | 4.57E-25  | M2_TAM_EBI3 |                                                               |            |                                                                                                                  |    |
| TIMP2    | 0.436838272 | 4.41E-24  | M2_TAM_EBI3 |                                                               |            |                                                                                                                  |    |
| GPNMB    | 0.714273794 | 5.23E-24  | M2_TAM_EBI3 |                                                               |            |                                                                                                                  |    |

|         |             |          |             |
|---------|-------------|----------|-------------|
| CTSZ    | 0.519228071 | 5.87E-24 | M2_TAM_EBI3 |
| CD72    | 0.344226952 | 1.54E-23 | M2_TAM_EBI3 |
| HLA-DOA | 0.306988253 | 7.48E-23 | M2_TAM_EBI3 |
| CD59    | 0.414434641 | 1.51E-22 | M2_TAM_EBI3 |
| CXCL12  | 0.403794688 | 1.67E-22 | M2_TAM_EBI3 |
| APOC1   | 0.682222655 | 2.46E-22 | M2_TAM_EBI3 |
| FPR3    | 0.380385859 | 3.83E-22 | M2_TAM_EBI3 |
| ATP1B1  | 0.411666337 | 4.97E-22 | M2_TAM_EBI3 |
| FABP5   | 0.64070223  | 5.63E-22 | M2_TAM_EBI3 |
| MAN2B1  | 0.35945656  | 1.77E-21 | M2_TAM_EBI3 |
| BLVRB   | 0.421903408 | 1.87E-21 | M2_TAM_EBI3 |
| LY86    | 0.37338547  | 2.25E-21 | M2_TAM_EBI3 |
| CD14    | 0.639463058 | 2.94E-21 | M2_TAM_EBI3 |
| VMO1    | 0.446272846 | 5.80E-20 | M2_TAM_EBI3 |
| LYZ     | 0.588944161 | 6.47E-20 | M2_TAM_EBI3 |
| PLA2G7  | 0.514198214 | 2.05E-19 | M2_TAM_EBI3 |
| CD9     | 0.481061264 | 6.28E-19 | M2_TAM_EBI3 |
| FABP4   | 1.074722315 | 6.39E-19 | M2_TAM_EBI3 |
| ALCAM   | 0.250968645 | 8.96E-19 | M2_TAM_EBI3 |
| FUCA1   | 0.276848407 | 1.40E-18 | M2_TAM_EBI3 |
| ADAP2   | 0.365603493 | 2.88E-18 | M2_TAM_EBI3 |
| IFNGR1  | 0.391976372 | 8.77E-18 | M2_TAM_EBI3 |
| CYBA    | 0.373184023 | 8.98E-18 | M2_TAM_EBI3 |
| DHRS9   | 0.300429358 | 1.60E-17 | M2_TAM_EBI3 |
| KCNMA1  | 0.333317945 | 1.93E-17 | M2_TAM_EBI3 |
| RNASE6  | 0.291956395 | 2.90E-17 | M2_TAM_EBI3 |
| CTSH    | 0.407302986 | 3.03E-17 | M2_TAM_EBI3 |
| SNX6    | 0.355925382 | 3.39E-17 | M2_TAM_EBI3 |
| FTL     | 0.290675464 | 3.86E-17 | M2_TAM_EBI3 |
| FGL2    | 0.454450333 | 4.31E-17 | M2_TAM_EBI3 |
| MFSD1   | 0.355625858 | 9.46E-17 | M2_TAM_EBI3 |
| CTSC    | 0.407074428 | 1.40E-16 | M2_TAM_EBI3 |
| MPEG1   | 0.375989489 | 3.45E-16 | M2_TAM_EBI3 |
| IGSF21  | 0.257388449 | 4.89E-16 | M2_TAM_EBI3 |
| NRP1    | 0.263581367 | 6.68E-16 | M2_TAM_EBI3 |
| SAMHD1  | 0.339300394 | 7.45E-16 | M2_TAM_EBI3 |
| RGS1    | 0.446589986 | 8.61E-16 | M2_TAM_EBI3 |
| RNF130  | 0.366188107 | 1.07E-15 | M2_TAM_EBI3 |
| FCHO2   | 0.283532222 | 1.87E-15 | M2_TAM_EBI3 |
| SCARB2  | 0.333689297 | 4.16E-15 | M2_TAM_EBI3 |
| CYFIP1  | 0.278006994 | 6.18E-15 | M2_TAM_EBI3 |
| SDC3    | 0.387687198 | 7.91E-15 | M2_TAM_EBI3 |
| GPR34   | 0.304459149 | 1.02E-14 | M2_TAM_EBI3 |
| CTSD    | 0.537449801 | 1.72E-14 | M2_TAM_EBI3 |
| GAA     | 0.25645567  | 1.73E-14 | M2_TAM_EBI3 |
| LILRB5  | 0.346840843 | 2.22E-14 | M2_TAM_EBI3 |
| C1orf54 | 0.289784223 | 2.27E-14 | M2_TAM_EBI3 |
| LAIR1   | 0.297039423 | 2.45E-14 | M2_TAM_EBI3 |
| CCL18   | 0.341420346 | 2.50E-14 | M2_TAM_EBI3 |
| TREM2   | 0.428235293 | 3.22E-14 | M2_TAM_EBI3 |
| MRC1    | 0.290448731 | 3.23E-14 | M2_TAM_EBI3 |
| NR1H3   | 0.274392467 | 4.48E-14 | M2_TAM_EBI3 |
| EPB41L2 | 0.311342017 | 4.64E-14 | M2_TAM_EBI3 |
| LY96    | 0.300206703 | 6.46E-14 | M2_TAM_EBI3 |
| TSPAN4  | 0.281047408 | 6.87E-14 | M2_TAM_EBI3 |
| NENF    | 0.284102207 | 1.38E-13 | M2_TAM_EBI3 |
| MSR1    | 0.381590832 | 2.16E-13 | M2_TAM_EBI3 |
| ADA2    | 0.297041723 | 5.79E-13 | M2_TAM_EBI3 |
| FCGR1A  | 0.256258369 | 6.46E-13 | M2_TAM_EBI3 |
| SCD     | 0.307396718 | 8.02E-13 | M2_TAM_EBI3 |
| CPM     | 0.271371576 | 3.29E-12 | M2_TAM_EBI3 |
| YWHAH   | 0.264586027 | 5.77E-12 | M2_TAM_EBI3 |
| PPT1    | 0.326446867 | 8.12E-12 | M2_TAM_EBI3 |
| RAB32   | 0.306544574 | 8.32E-12 | M2_TAM_EBI3 |



|          |             |            |             |
|----------|-------------|------------|-------------|
| HLA-A    | 0.29564519  | 1.28E-11   | M2_TAM_EBI3 |
| CD4      | 0.265862044 | 1.29E-11   | M2_TAM_EBI3 |
| LAPTM5   | 0.291738952 | 1.43E-11   | M2_TAM_EBI3 |
| ASAH1    | 0.331803202 | 1.46E-11   | M2_TAM_EBI3 |
| GIMAP4   | 0.265520203 | 1.60E-11   | M2_TAM_EBI3 |
| PKD4     | 0.320777105 | 1.80E-11   | M2_TAM_EBI3 |
| RPN2     | 0.256960666 | 2.03E-11   | M2_TAM_EBI3 |
| CD84     | 0.267968608 | 2.64E-11   | M2_TAM_EBI3 |
| IQGAP2   | 0.289570474 | 4.36E-11   | M2_TAM_EBI3 |
| CTSS     | 0.399871173 | 6.66E-11   | M2_TAM_EBI3 |
| LAMP2    | 0.257904249 | 8.77E-11   | M2_TAM_EBI3 |
| TPP1     | 0.305645239 | 9.01E-11   | M2_TAM_EBI3 |
| QKI      | 0.283718214 | 2.13E-10   | M2_TAM_EBI3 |
| CANX     | 0.270442374 | 2.17E-10   | M2_TAM_EBI3 |
| LRP1     | 0.258567245 | 2.42E-10   | M2_TAM_EBI3 |
| PDIAG6   | 0.254533698 | 2.65E-10   | M2_TAM_EBI3 |
| LAMP1    | 0.292452637 | 3.02E-10   | M2_TAM_EBI3 |
| MARCKS   | 0.351946153 | 3.78E-10   | M2_TAM_EBI3 |
| DPP7     | 0.258771772 | 3.79E-10   | M2_TAM_EBI3 |
| SLC15A3  | 0.272219728 | 5.33E-10   | M2_TAM_EBI3 |
| BNIP3L   | 0.252689464 | 6.22E-10   | M2_TAM_EBI3 |
| CTSL     | 0.455235914 | 7.64E-10   | M2_TAM_EBI3 |
| KCTD12   | 0.255728225 | 1.50E-09   | M2_TAM_EBI3 |
| RGS10    | 0.309234155 | 4.92E-09   | M2_TAM_EBI3 |
| ACP5     | 0.399941135 | 6.86E-09   | M2_TAM_EBI3 |
| LGALS3   | 0.412247834 | 7.70E-09   | M2_TAM_EBI3 |
| SGK1     | 0.295391866 | 8.19E-09   | M2_TAM_EBI3 |
| CEBPD    | 0.33063734  | 8.80E-09   | M2_TAM_EBI3 |
| CXCL16   | 0.266639959 | 1.04E-08   | M2_TAM_EBI3 |
| GLUL     | 0.31034174  | 1.41E-08   | M2_TAM_EBI3 |
| ANXA5    | 0.257032166 | 3.73E-08   | M2_TAM_EBI3 |
| ARL4C    | 0.294950864 | 3.74E-08   | M2_TAM_EBI3 |
| DAB2     | 0.282416224 | 4.92E-08   | M2_TAM_EBI3 |
| GADD45B  | 0.361051334 | 5.68E-07   | M2_TAM_EBI3 |
| ZFP36L1  | 0.361462908 | 6.73E-07   | M2_TAM_EBI3 |
| TMIGD3   | 0.252830155 | 7.82E-07   | M2_TAM_EBI3 |
| DNASE1L3 | 0.254395995 | 1.04E-06   | M2_TAM_EBI3 |
| IRF8     | 0.319324944 | 1.36E-06   | M2_TAM_EBI3 |
| CYBB     | 0.285314234 | 1.51E-06   | M2_TAM_EBI3 |
| UGCG     | 0.253083503 | 5.90E-06   | M2_TAM_EBI3 |
| OTOA     | 0.270582082 | 6.64E-06   | M2_TAM_EBI3 |
| CSF1R    | 0.257002281 | 9.23E-06   | M2_TAM_EBI3 |
| ID2      | 0.297471795 | 1.09E-05   | M2_TAM_EBI3 |
| VIM      | 0.334332076 | 3.46E-05   | M2_TAM_EBI3 |
| MMP19    | 0.287295565 | 0.00338354 | M2_TAM_EBI3 |
| ID3      | 0.269656114 | 0.00374133 | M2_TAM_EBI3 |

**i.M2\_TAM\_EBI3\_MARCO**

| Gene symbol | avg_log2FC  | p_val_adj | Upregulated group | Description                  | pvalue   | geneID                                                                                                                                                                                                                  | Count |
|-------------|-------------|-----------|-------------------|------------------------------|----------|-------------------------------------------------------------------------------------------------------------------------------------------------------------------------------------------------------------------------|-------|
| MARCO       | 4.415766896 | 0         | M2_TAM_EBI3_MARCO | Rheumatoid arthritis         | 5.52E-17 | CD80/CTSL/CXCL1/CXCL3/HLA-DMA/HLA-DPA1/HLA-DPB1/HLA-DQA1/HLA-DQB1/HLA-DRA/HLA-DRB1/HLA-DRB5/ICAM1/IL1A/IL1B/IL6/IL18/JUN/CCL3/CCL3L1/CCL20/CXCL12/TLR2/TNF/TNFSF13B                                                     | 25    |
| NDST3       | 0.81211987  | 0         | M2_TAM_EBI3_MARCO | Epstein-Barr virus infection | 6.33E-16 | B2M/CCND1/CD44/E2F3/HLA-A/HLA-B/HLA-C/HLA-DMA/HLA-DPA1/HLA-DPB1/HLA-DQA1/HLA-DQB1/HLA-DRA/HLA-DRB1/HLA-DRB5/HLA-E/ICAM1/IFNAR1/IL6/CXCL10/JAK1/JUN/MYD88/GADD45B/NFKBIE/OAS2/RAC1/RELB/STAT1/TLR2/TNF/TNFAIP3/VIM/ISG15 | 34    |
| CETP        | 1.783974978 | 1.43E-289 | M2_TAM_EBI3_MARCO | Leishmaniasis                | 1.08E-15 | CR1/CYBA/CYBB/FCGR3A/HLA-DMA/HLA-DPA1/HLA-DPB1/HLA-DQA1/HLA-DQB1/HLA-DRA/HLA-DRB1/HLA-DRB5/IFNGR2/IL1A/IL1B/JAK1/JUN/MYD88/STAT1/TLR2/TNF/NCF1                                                                          | 22    |
| TIMD4       | 0.83443466  | 7.15E-266 | M2_TAM_EBI3_MARCO | Graft-versus-host disease    | 2.75E-15 | CD80/HLA-A/HLA-B/HLA-C/HLA-DMA/HLA-DPA1/HLA-DPB1/HLA-DQA1/HLA-DQB1/HLA-DRA/HLA-DRB1/HLA-DRB5/HLA-E/IL1A/IL1B/IL6/TNF                                                                                                    | 17    |

|         |             |           |                   |                                                               |          |                                                                                                                                                                                    |    |
|---------|-------------|-----------|-------------------|---------------------------------------------------------------|----------|------------------------------------------------------------------------------------------------------------------------------------------------------------------------------------|----|
| ITLN1   | 1.262653183 | 6.49E-254 | M2_TAM_EBI3_MARCO | Phagosome                                                     | 2.63E-14 | CANX/CTSL/CTSS/CYBA/CYBB/FCGR3A/HLA-A/HLA-B/HLA-C/HLA-DMA/HLA-DPA1/HLA-DPB1/HLA-DQA1/HLA-DQB1/HLA-DRA/HLA-DRB1/HLA-DRB5/HLA-E/LAMP2/M6PR/MRC1/MSR1/RAC1/THBS1/TLR2/MARCO/MRC2/NCF1 | 28 |
| CD5L    | 3.371510949 | 2.45E-169 | M2_TAM_EBI3_MARCO | Type I diabetes mellitus                                      | 9.00E-14 | CD80/HLA-A/HLA-B/HLA-C/HLA-DMA/HLA-DPA1/HLA-DPB1/HLA-DQA1/HLA-DQB1/HLA-DRA/HLA-DRB1/HLA-DRB5/HLA-E/IL1A/IL1B/TNF                                                                   | 16 |
| IL6     | 1.327321404 | 4.18E-116 | M2_TAM_EBI3_MARCO | Tuberculosis                                                  | 2.09E-12 | DRB5/IFNGR2/IL1A/IL1B/IL6/IL18/IRAK2/JAK1/LAMP2/MRC1/MYD88/STAT1/TLR2/TNF/RIPK2/MRC2/CALML4                                                                                        | 28 |
| CDH5    | 0.476779181 | 6.48E-115 | M2_TAM_EBI3_MARCO | Allograft rejection                                           | 3.93E-12 | CD80/HLA-A/HLA-B/HLA-C/HLA-DMA/HLA-DPA1/HLA-DPB1/HLA-DQA1/HLA-DQB1/HLA-DRA/HLA-DRB1/HLA-DRB5/HLA-E/TNF                                                                             | 14 |
| TMIGD3  | 1.384176387 | 6.34E-103 | M2_TAM_EBI3_MARCO | Inflammatory bowel disease                                    | 1.04E-11 | HLA-DMA/HLA-DPA1/HLA-DPB1/HLA-DQA1/HLA-DQB1/HLA-DRA/HLA-DRB1/HLA-DRB5/IFNGR2/IL1A/IL1B/IL6/IL18/JUN/STAT1/TLR2/TNF                                                                 | 17 |
| KCNJ10  | 0.401427841 | 8.99E-88  | M2_TAM_EBI3_MARCO | Antigen processing and presentation                           | 2.52E-11 | B2M/CANX/CTSB/CTSL/CTSS/HLA-A/HLA-B/HLA-C/HLA-DMA/HLA-DPA1/HLA-DPB1/HLA-DQA1/HLA-DQB1/HLA-DRA/HLA-DRB1/HLA-DRB5/HLA-E/TNF                                                          | 18 |
| NR1H3   | 1.459484846 | 3.80E-78  | M2_TAM_EBI3_MARCO | Viral myocarditis                                             | 3.12E-11 | CCND1/CD80/HLA-A/HLA-B/HLA-C/HLA-DMA/HLA-DPA1/HLA-DPB1/HLA-DQA1/HLA-DQB1/HLA-DRA/HLA-DRB1/HLA-DRB5/HLA-E/ICAM1/RAC1                                                                | 16 |
| PLAC8   | 1.68972607  | 1.16E-68  | M2_TAM_EBI3_MARCO | Influenza A                                                   | 7.67E-10 | HLA-DMA/HLA-DPA1/HLA-DPB1/HLA-DQA1/HLA-DQB1/HLA-DRA/HLA-DRB1/HLA-DRB5/ICAM1/IFNAR1/IFNGR2/IL1A/IL1B/IL6/IL18/CXCL10/JAK1/MYD88/OAS2/STAT1/TNF/TNFSF10/SOCS3/CALCOCO2               | 24 |
| CFP     | 1.48022034  | 1.94E-64  | M2_TAM_EBI3_MARCO | Lysosome                                                      | 8.98E-10 | ACP2/SCARB2/CD63/CD68/TPP1/CTSB/CTSL/CTSS/CTS2/DNASE2/FUCA1/GAA/GNS/GUSB/LAMP2/LIPA/M6PR/MAN2B1/CTSA/CD164/DMXL2                                                                   | 21 |
| ALDH2   | 1.072450465 | 4.12E-61  | M2_TAM_EBI3_MARCO | Coronavirus disease - COVID-19                                | 9.80E-10 | C1QA/C1QB/C1QC/C2/CYBB/CFD/IFNAR1/IL1B/IL6/CXCL10/JAK1/JUN/MYD88/OAS2/RPL21/RPL26/RPL27A/RPS6/RPS9/RPS11/RPS18/RPS20/RPS29/STAT1/TLR2/TNF/RPL23/SG15                               | 28 |
| AXL     | 1.208486573 | 2.61E-54  | M2_TAM_EBI3_MARCO | Hematopoietic cell lineage                                    | 1.63E-09 | CD38/CD44/CD59/CR1/CSF1R/CSF3R/HLA-DMA/HLA-DPA1/HLA-DPB1/HLA-DQA1/HLA-DQB1/HLA-DRA/HLA-DRB1/HLA-DRB5/IL1A/IL1B/IL6/TNF                                                             | 18 |
| KCNJ2   | 0.601110771 | 1.67E-53  | M2_TAM_EBI3_MARCO | Lipid and atherosclerosis                                     | 3.88E-09 | ABCA1/BCL2L1/CYBA/CYBB/CXCL1/CXCL3/ICAM1/IL1B/IL6/IL18/JUN/MYD88/RAC1/RAPIB/CCL3/CCL3L1/SOD2/TLR2/TNF/VCAM1/XBP1/TNFSF10/ABCG1/LY96/CALML4/NC                                      | 26 |
| C2      | 1.073172827 | 6.26E-52  | M2_TAM_EBI3_MARCO | Autoimmune thyroid disease                                    | 7.13E-09 | CD80/HLA-A/HLA-B/HLA-C/HLA-DMA/HLA-DPA1/HLA-DPB1/HLA-DQA1/HLA-DQB1/HLA-DRA/HLA-DRB1/HLA-DRB5/HLA-E                                                                                 | 13 |
| IFI27   | 2.329096608 | 2.79E-50  | M2_TAM_EBI3_MARCO | Staphylococcus aureus infection                               | 7.16E-09 | C1QA/C1QB/C1QC/CFD/FCGR3A/FPR1/HLA-DMA/HLA-DPA1/HLA-DPB1/HLA-DQA1/HLA-DQB1/HLA-DRA/HLA-DRB1/HLA-DRB5/ICAM1/PTAFR                                                                   | 17 |
| IL18    | 1.38221341  | 3.20E-50  | M2_TAM_EBI3_MARCO | Pertussis                                                     | 1.21E-08 | SERPING1/C1QA/C1QB/C1QC/IRF8/IL1A/IL1B/IL6/IRF1/JUN/MYD88/TNF/LY96/CALML4                                                                                                          | 15 |
| C1QB    | 1.94289944  | 3.30E-49  | M2_TAM_EBI3_MARCO | Osteoclast differentiation                                    | 1.90E-08 | CSF1R/CYBA/FCGR3A/GRB2/IFNAR1/IFNGR2/IL1A/IL1B/JAK1/JUN/RAC1/RELB/STAT1/TNF/SOCS3/LILRB1/LILRB5/LILRB4/NCF1                                                                        | 19 |
| EXT1    | 0.528912208 | 4.52E-47  | M2_TAM_EBI3_MARCO | NF-kappa B signaling pathway                                  | 2.51E-08 | BIRC3/BCL2L1/CXCL1/CXCL3/ICAM1/IL1B/MYD88/GADD45B/RELB/CCL4/CXCL12/TNF/TNFAIP3/VCAM1/CCL4L2/TNFSF13B/LY96                                                                          | 17 |
| FCGRT   | 1.619498558 | 5.02E-47  | M2_TAM_EBI3_MARCO | Toll-like receptor signaling pathway                          | 2.51E-08 | CD80/MAP3K8/IFNAR1/IL1B/IL6/CXCL10/JUN/MYD88/RAC1/CCL3/CCL3L1/CCL4/STAT1/TLR2/TNF/CCL4L2/LY96                                                                                      | 17 |
| FTL     | 1.504344476 | 3.70E-46  | M2_TAM_EBI3_MARCO | Intestinal immune network for IgA production                  | 2.80E-08 | CD80/HLA-DMA/HLA-DPA1/HLA-DPB1/HLA-DQA1/HLA-DQB1/HLA-DRA/HLA-DRB1/HLA-DRB5/IL6/CXCL12/TNFSF13B                                                                                     | 12 |
| C1QA    | 1.689191715 | 7.26E-44  | M2_TAM_EBI3_MARCO | Human T-cell leukemia virus 1 infection                       | 3.37E-08 | B2M/CCND1/BCL2L1/CANX/E2F3/EGR1/ETS2/HLA-A/HLA-B/HLA-C/HLA-DMA/HLA-DPA1/HLA-DPB1/HLA-DQA1/HLA-DQB1/HLA-DRA/HLA-DRB1/HLA-DRB5/HLA-E/ICAM1/IL6/JAK1/JUN/RELB/TNF                     | 25 |
| CLIC2   | 0.720197381 | 1.07E-43  | M2_TAM_EBI3_MARCO | Th17 cell differentiation                                     | 4.48E-08 | HIF1A/HLA-DMA/HLA-DPA1/HLA-DPB1/HLA-DQA1/HLA-DQB1/HLA-DRA/HLA-DRB1/HLA-DRB5/IFNGR2/IL1B/IL6/JAK1/JUN/NFKBIE/STAT1/EBI3                                                             | 17 |
| STOM    | 0.953297069 | 3.47E-43  | M2_TAM_EBI3_MARCO | Cell adhesion molecules                                       | 4.58E-08 | CD80/CDH5/HLA-A/HLA-B/HLA-C/HLA-DMA/HLA-DPA1/HLA-DPB1/HLA-DQA1/HLA-DQB1/HLA-DRA/HLA-DRB1/HLA-DRB5/HLA-E/ICAM1/NECTIN2/SIGLEC1/VCAM1/SDC3/CD226                                     | 20 |
| EPB41L2 | 1.148836841 | 5.15E-42  | M2_TAM_EBI3_MARCO | Toxoplasmosis                                                 | 7.80E-08 | BIRC3/BCL2L1/HLA-DMA/HLA-DPA1/HLA-DPB1/HLA-DQA1/HLA-DQB1/HLA-DRA/HLA-DRB1/HLA-DRB5/IFNGR2/JAK1/MYD88/STAT1/TLR2/TNF/LY96                                                           | 17 |
| VCAM1   | 1.540352964 | 8.14E-42  | M2_TAM_EBI3_MARCO | NOD-like receptor signaling pathway                           | 8.01E-08 | BIRC3/BCL2L1/CTSB/CYBA/CYBB/GBP1/GBP2/CXCL1/CXCL3/IFNAR1/IL1B/IL6/IL18/JAK1/JUN/MYD88/OAS2/P2RX7/STAT1/TNF/TNFAIP3/RIPK2                                                           | 22 |
| VSIG4   | 1.315835142 | 1.20E-41  | M2_TAM_EBI3_MARCO | Viral protein interaction with cytokine and cytokine receptor | 8.92E-08 | CCR1/CSF1R/CXCL1/CXCL3/IL6/IL18/CXCL10/CCL3/CCL3L1/CCL4/CCL20/CCL23/CXCL12/TNF/TNFSF10/CCL4L2                                                                                      | 16 |
| DST     | 0.923970153 | 1.73E-41  | M2_TAM_EBI3_MARCO | Asthma                                                        | 3.27E-07 | HLA-DMA/HLA-DPA1/HLA-DPB1/HLA-DQA1/HLA-DQB1/HLA-DRA/HLA-DRB1/HLA-DRB5/TNF                                                                                                          | 9  |
| BASP1   | 1.193919421 | 1.90E-41  | M2_TAM_EBI3_MARCO | Malaria                                                       | 3.52E-07 | CD81/CR1/ICAM1/IL1B/IL6/IL18/MYD88/THBS1/TLR2/TNF/VCAM1                                                                                                                            | 11 |

|           |             |          |                   |                                                        |            |                                                                                                                                                                                             |    |
|-----------|-------------|----------|-------------------|--------------------------------------------------------|------------|---------------------------------------------------------------------------------------------------------------------------------------------------------------------------------------------|----|
| RND3      | 0.955992693 | 1.43E-39 | M2_TAM_EBI3_MARCO | Human cytomegalovirus infection                        | 7.09E-07   | B2M/CCND1/CCR1/E2F3/GNG10/GRB2/HLA-A/HLA-B/HLA-C/HLA-E/IL1B/IL6/JAK1/PTGER4/RAC1/CCL3/CCL3L1/CCL4/CXCL12/TNF/CCL4L2/GNB4/CALML4                                                             | 23 |
| G0S2      | 1.547701963 | 3.74E-39 | M2_TAM_EBI3_MARCO | Th1 and Th2 cell differentiation                       | 1.09E-06   | HLA-DMA/HLA-DPA1/HLA-DPB1/HLA-DQA1/HLA-DQB1/HLA-DRA/HLA-DRB1/HLA-DRB5/IFNGR2/JAK1/JUN/NFKBIE/STAT1/DLL1                                                                                     | 14 |
| CXCL12    | 1.472740942 | 3.76E-39 | M2_TAM_EBI3_MARCO | Cytokine-cytokine receptor interaction                 | 2.28E-06   | ACVRL1/CCR1/CSF1R/CSF3R/CXCL1/CXCL3/IFNAR1/IFNGR2/IL1A/IL1B/IL1RN/IL6/IL18/CXCL10/CCL3/CCL3L1/CCL4/CCL20/CCL23/CXCL12/TNF/TNFSF10/TNFSF9/CCL4L2/EBI3/TNFSF13B                               | 26 |
| ACTN1     | 0.946215201 | 4.51E-36 | M2_TAM_EBI3_MARCO | TNF signaling pathway                                  | 2.38E-06   | BIRC3/MAP3K8/CXCL1/CXCL3/ICAM1/IL1B/IL6/CXCL10/IRF1/JUN/CCL20/TNF/TNFAIP3/VCAM1/SOCS3                                                                                                       | 15 |
| PSTPIP2   | 0.66479969  | 9.15E-36 | M2_TAM_EBI3_MARCO | Kaposi sarcoma-associated herpesvirus infection        | 3.40E-06   | CCND1/CCR1/E2F3/GNG10/CXCL1/CXCL3/HIF1A/HLA-A/HLA-B/HLA-C/HLA-E/ICAM1/IFNAR1/IL6/JAK1/JUN/RAC1/STAT1/GNB4/CALML4                                                                            | 20 |
| CD44      | 1.277829462 | 2.62E-35 | M2_TAM_EBI3_MARCO | Ferroptosis                                            | 4.29E-06   | CYBB/ACSL1/FTL/HMOX1/PRNP/SAT1/NCOA4/SLC40A1/SLC39A8                                                                                                                                        | 9  |
| CD226     | 0.293155445 | 3.03E-35 | M2_TAM_EBI3_MARCO | Systemic lupus erythematosus                           | 6.18E-06   | ACTN1/C1QA/C1QB/C1QC/C2/CD80/FCGR3A/HLA-DMA/HLA-DPA1/HLA-DPB1/HLA-DQA1/HLA-DQB1/HLA-DRA/HLA-DRB1/HLA-DRB5/TNF                                                                               | 16 |
| IFT74     | 0.420765242 | 6.16E-35 | M2_TAM_EBI3_MARCO | Chemokine signaling pathway                            | 3.89E-05   | CCR1/GNG10/GRB2/CXCL1/CXCL3/CXCL10/RAC1/RAP1B/CCL3/CCL3L1/CCL4/CCL20/CCL23/CXCL12/STAT1/CCL4L2/GNB4/NCF1                                                                                    | 18 |
| TMEM26    | 0.357255536 | 6.90E-35 | M2_TAM_EBI3_MARCO | Legionellosis                                          | 7.04E-05   | CR1/CXCL1/CXCL3/IL1B/IL6/IL18/MYD88/TLR2/TNF                                                                                                                                                | 9  |
| SERPING1  | 0.831361361 | 1.73E-34 | M2_TAM_EBI3_MARCO | AGE-RAGE signaling pathway in diabetic complications   | 7.50E-05   | CCND1/CYBB/EGR1/ICAM1/IL1A/IL1B/IL6/JUN/RAC1/STAT1/TNF/VCAM1                                                                                                                                | 12 |
| DLL1      | 0.267635764 | 7.52E-34 | M2_TAM_EBI3_MARCO | Chagas disease                                         | 9.11E-05   | C1QA/C1QB/C1QC/IFNGR2/IL1B/IL6/JUN/MYD88/CCL3/CCL3L1/TLR2/TNF                                                                                                                               | 12 |
| FUCA1     | 0.920377651 | 1.66E-33 | M2_TAM_EBI3_MARCO | Fluid shear stress and atherosclerosis                 | 0.00013299 | CDH5/CTSL/CYBA/HMOX1/ICAM1/IL1A/IL1B/JUN/RAC1/TNF/VCAM1/TRPV4/CALML4/NCF1                                                                                                                   | 14 |
| BCAM      | 0.333886876 | 2.96E-33 | M2_TAM_EBI3_MARCO | African trypanosomiasis                                | 0.00014114 | ICAM1/IL1B/IL6/IL18/MYD88/TNF/VCAM1                                                                                                                                                         | 7  |
| GPR137B   | 0.69603533  | 1.60E-31 | M2_TAM_EBI3_MARCO | Necroptosis                                            | 0.00016111 | BIRC3/CYBB/FTL/GLUL/IFNAR1/IFNGR2/IL1A/IL1B/JAK1/PYGL/STAT1/TNF/TNFAIP3/TNFSF10/CHMP5                                                                                                       | 15 |
| LINC02605 | 0.44439909  | 2.62E-31 | M2_TAM_EBI3_MARCO | Alcoholic liver disease                                | 0.00016711 | ALDH2/CCND1/C1QA/C1QB/C1QC/C2/CXCL1/CXCL3/IL1B/IL6/MYD88/SCD/TNF/LY96                                                                                                                       | 14 |
| NFE2L3    | 0.435881487 | 2.84E-31 | M2_TAM_EBI3_MARCO | Complement and coagulation cascades                    | 0.00035086 | SERPING1/C1QA/C1QB/C1QC/C2/CD59/CR1/CFD/PROS1/VSIG4                                                                                                                                         | 10 |
| SDC3      | 1.243379418 | 9.00E-31 | M2_TAM_EBI3_MARCO | Measles                                                | 0.00047757 | CCND1/BCL2L1/IFNAR1/IL1A/IL1B/IL6/JAK1/JUN/MYD88/OAS2/STAT1/TLR2/TNFAIP3                                                                                                                    | 13 |
| SCD       | 1.04686431  | 1.30E-30 | M2_TAM_EBI3_MARCO | Natural killer cell mediated cytotoxicity              | 0.00094303 | FCGR3A/GRB2/HLA-A/HLA-B/HLA-C/HLA-E/ICAM1/IFNAR1/IFNGR2/RAC1/TNF/TNFSF10                                                                                                                    | 12 |
| CMKLR1    | 0.751844673 | 1.36E-30 | M2_TAM_EBI3_MARCO | Leukocyte transendothelial migration                   | 0.00099581 | ACTN1/CDH5/CYBA/CYBB/ICAM1/RAC1/RAP1B/CXCL12/VASP/VCAM1/NCF1                                                                                                                                | 11 |
| CPVL      | 1.280244838 | 2.10E-30 | M2_TAM_EBI3_MARCO | Herpes simplex virus 1 infection                       | 0.00105531 | BIRC3/B2M/BCL2L1/BST2/HLA-A/HLA-B/HLA-C/HLA-DMA/HLA-DPA1/HLA-DPB1/HLA-DQA1/HLA-DQB1/HLA-DRA/HLA-DRB1/HLA-DRB5/HLA-E/IFNAR1/IFNGR2/IL1B/IL6/JAK1/MYD88/OAS2/CFP/NECTIN2/STAT1/TLR2/TNF/SOCS3 | 29 |
| VIM       | 1.191021392 | 2.36E-30 | M2_TAM_EBI3_MARCO | B cell receptor signaling pathway                      | 0.00114592 | CD81/GRB2/JUN/NFKBIE/RAC1/LILRB1/LILRB5/LILRB4/PIK3AP1                                                                                                                                      | 9  |
| LIPA      | 1.417858399 | 2.69E-29 | M2_TAM_EBI3_MARCO | Human immunodeficiency virus 1 infection               | 0.0012009  | B2M/BCL2L1/BST2/GNG10/HLA-A/HLA-B/HLA-C/HLA-E/JUN/LIMK2/MYD88/RAC1/TLR2/TNF/GNB4/CALML4                                                                                                     | 16 |
| FEZ1      | 0.35439467  | 3.68E-29 | M2_TAM_EBI3_MARCO | PD-L1 expression and PD-1 checkpoint pathway in cancer | 0.00204817 | HIF1A/IFNGR2/JAK1/JUN/MYD88/NFKBIE/STAT1/TLR2/BATF                                                                                                                                          | 9  |
| TCN2      | 0.585493348 | 4.07E-29 | M2_TAM_EBI3_MARCO | Mineral absorption                                     | 0.00283647 | ATP1B1/FXYD2/ATP2B1/FTL/HMOX1/SLC8A1/SLC40A1                                                                                                                                                | 7  |
| NBN       | 0.937078691 | 4.35E-29 | M2_TAM_EBI3_MARCO | IL-17 signaling pathway                                | 0.00298578 | CXCL1/CXCL3/IL1B/IL6/CXCL10/JUN/CCL20/TNF/TNFAIP3                                                                                                                                           | 9  |
| GBP1      | 0.97145346  | 7.53E-29 | M2_TAM_EBI3_MARCO | Cellular senescence                                    | 0.00413634 | CCND1/E2F3/HLA-A/HLA-B/HLA-C/HLA-E/IL1A/IL6/GADD45B/NBN/TRPV4/CALML4                                                                                                                        | 12 |
| CD38      | 0.491631192 | 9.32E-29 | M2_TAM_EBI3_MARCO | Hepatitis C                                            | 0.00435482 | CCND1/CD81/E2F3/GRB2/IFNAR1/CXCL10/JAK1/OAS2/STAT1/TNF/SOCS3/NR1H3                                                                                                                          | 12 |
| RAPGEF2   | 0.896365518 | 1.23E-28 | M2_TAM_EBI3_MARCO | Cholesterol metabolism                                 | 0.00488649 | ABCA1/APOE/CETP/LIPA/PLTP/NCEH1                                                                                                                                                             | 6  |
| MYO9A     | 0.436732092 | 2.08E-28 | M2_TAM_EBI3_MARCO | Shigellosis                                            | 0.00556523 | ACTN1/BCL2L1/CD44/HCLS1/IL1B/IL18/JUN/MYD88/RAC1/TNF/UBE2D1/RIPK2/ARPC5/ACTR3/CALCOCO2/FNBP1                                                                                                | 16 |
| HCAR3     | 0.454383974 | 3.31E-28 | M2_TAM_EBI3_MARCO | C-type lectin receptor signaling pathway               | 0.00585667 | PLK3/IL1B/IL6/IRF1/JUN/RELB/STAT1/TNF/CALML4                                                                                                                                                | 9  |
| DRAM1     | 0.896939044 | 4.72E-28 | M2_TAM_EBI3_MARCO | Salmonella infection                                   | 0.00600673 | BIRC3/IL1B/IL6/IL18/JUN/M6PR/MYD88/RAC1/TLR2/TNF/TNFSF10/RIPK2/ABI1/ARPC5/ACTR3/LY96                                                                                                        | 16 |
| GLUL      | 1.177204314 | 3.10E-27 | M2_TAM_EBI3_MARCO | Pathogenic Escherichia coli infection                  | 0.01031231 | HCLS1/IL1B/IL6/IL18/JUN/MYD88/NCK1/RAC1/TNF/TNFSF10/ABI1/ARPC5/ACTR3                                                                                                                        | 13 |
| CD163     | 1.86590631  | 3.69E-27 | M2_TAM_EBI3_MARCO | Pancreatic cancer                                      | 0.01044398 | CCND1/BCL2L1/E2F3/JAK1/GADD45B/RAC1/STAT1                                                                                                                                                   | 7  |
| SMPDL3A   | 0.548336829 | 6.05E-27 | M2_TAM_EBI3_MARCO | Apoptosis                                              | 0.01155706 | BIRC3/BCL2L1/CTSB/CTSL/CTSS/CTSZ/JUN/GADD45B/TNF/TNFSF10                                                                                                                                    | 10 |
| MS4A6A    | 1.148969383 | 1.16E-26 | M2_TAM_EBI3_MARCO | Fc gamma R-mediated phagocytosis                       | 0.01209335 | FCGR3A/LIMK2/MARCKS/RAC1/VASP/ARPC5/ACTR3/NCF1                                                                                                                                              | 8  |
| CD80      | 0.366265395 | 2.03E-26 | M2_TAM_EBI3_MARCO | Proteoglycans in cancer                                | 0.01405198 | CCND1/CD44/CD63/CTSL/GRB2/HCLS1/HIF1A/RAC1/RPS6/THBS1/TLR2/TNF/IQGAP1                                                                                                                       | 13 |
| CTSB      | 1.243144177 | 2.08E-26 | M2_TAM_EBI3_MARCO | Antifolate resistance                                  | 0.01447278 | FOLR2/IL1B/IL6/TNF                                                                                                                                                                          | 4  |
| C1QC      | 1.288099593 | 2.27E-26 | M2_TAM_EBI3_MARCO | Cytosolic DNA-sensing pathway                          | 0.01483238 | IL1B/IL6/IL18/CXCL10/CCL4/CCL4L2                                                                                                                                                            | 6  |
| CCL4L2    | 1.380820284 | 3.40E-26 | M2_TAM_EBI3_MARCO | Amoebiasis                                             | 0.01602955 | ACTN1/CXCL1/CXCL3/IL1B/IL6/PRDX1/TLR2/TNF                                                                                                                                                   | 8  |
| TMSB4X    | 0.651348399 | 6.43E-26 | M2_TAM_EBI3_MARCO | Arginine and proline metabolism                        | 0.02267183 | ALDH2/P4HA1/SAT1/LAP3/CNDP2                                                                                                                                                                 | 5  |

|            |             |          |                   |                                           |            |                                                                                 |    |
|------------|-------------|----------|-------------------|-------------------------------------------|------------|---------------------------------------------------------------------------------|----|
| SIGLEC9    | 0.483540951 | 1.15E-25 | M2_TAM_EBI3_MARCO | HIF-1 signaling pathway                   | 0.0229928  | CYBB/HIF1A/HMOX1/IFNGR2/IL6/PFKFB3/RPS6/TIMP1                                   | 8  |
| C11orf96   | 0.986405811 | 1.36E-25 | M2_TAM_EBI3_MARCO | Riboflavin metabolism                     | 0.02503248 | ACP2/RFK                                                                        | 2  |
| LAP3       | 0.830582511 | 2.08E-25 | M2_TAM_EBI3_MARCO | Non-alcoholic fatty liver disease         | 0.02644927 | IL1A/IL1B/IL6/JUN/NDUFA4/RAC1/TNF/XBP1/SOCS3/NR1H3                              | 10 |
| PDE4DIP    | 0.821149884 | 2.49E-25 | M2_TAM_EBI3_MARCO | Mitophagy - animal                        | 0.02695307 | BCL2L1/HIF1A/JUN/TAX1BP1/OPTN/CALCOCO2                                          | 6  |
| CREG1      | 1.086322001 | 4.39E-25 | M2_TAM_EBI3_MARCO | Prion disease                             | 0.02829693 | C1QA/C1QB/C1QC/CYBA/CYBB/EGR1/IL1A/IL1B/IL6/NDUFA4/PRNP/PSMA6/RAC1/TN<br>F/NCF1 | 15 |
| CR1        | 0.616931361 | 6.84E-25 | M2_TAM_EBI3_MARCO | Ribosome                                  | 0.02968221 | RPL21/RPL26/RPL27A/RPS6/RPS9/RPS11/RPS18/RPS20/RPS29/RPL23                      | 10 |
| RGS1       | 0.986071937 | 8.72E-25 | M2_TAM_EBI3_MARCO | Yersinia infection                        | 0.03101726 | IL1B/IL6/IL18/JUN/MYD88/RAC1/TNF/ARPC5/ACTR3                                    | 9  |
| SNX10      | 0.953536698 | 2.47E-24 | M2_TAM_EBI3_MARCO | Histidine metabolism                      | 0.03163136 | ALDH2/HNMT/CNDP2                                                                | 3  |
| CTSS       | 1.150499141 | 3.16E-24 | M2_TAM_EBI3_MARCO | PPAR signaling pathway                    | 0.0321266  | FABP3/ACSL1/ME1/PLTP/SCD/NR1H3                                                  | 6  |
| GCH1       | 0.558727459 | 6.98E-24 | M2_TAM_EBI3_MARCO | JAK-STAT signaling pathway                | 0.03441625 | CCND1/BCL2L1/CSF3R/GRB2/IFNAR1/IFNGR2/IL6/JAK1/STAT1/SOCS3                      | 10 |
| C1orf54    | 0.744083526 | 2.55E-23 | M2_TAM_EBI3_MARCO | Hepatitis B                               | 0.03441625 | E2F3/GRB2/IFNAR1/IL6/JAK1/JUN/MYD88/STAT1/TLR2/TNF                              | 10 |
| CCL4       | 1.251650299 | 2.79E-23 | M2_TAM_EBI3_MARCO | Renin-angiotensin system                  | 0.03554111 | CTSA/PRCP/ATP6AP2                                                               | 3  |
| NINJ1      | 0.948516782 | 8.02E-23 | M2_TAM_EBI3_MARCO | Neurotrophin signaling pathway            | 0.03628691 | GRB2/IRAK2/JUN/NFKBIE/RAC1/RAP1B/RIK2/CALML4                                    | 8  |
| ME1        | 0.546786348 | 1.32E-22 | M2_TAM_EBI3_MARCO | EGFR tyrosine kinase inhibitor resistance | 0.03997282 | AXL/BCL2L1/GRB2/IL6/JAK1/RPS6                                                   | 6  |
| TNIP3      | 0.299572955 | 1.64E-22 | M2_TAM_EBI3_MARCO | Bladder cancer                            | 0.04079311 | CCND1/E2F3/TYMP/THBS1                                                           | 4  |
| IL1B       | 1.501327352 | 2.45E-22 | M2_TAM_EBI3_MARCO |                                           |            |                                                                                 |    |
| DNAJC5B    | 0.270755654 | 4.30E-22 | M2_TAM_EBI3_MARCO |                                           |            |                                                                                 |    |
| MS4A7      | 1.04032411  | 4.41E-22 | M2_TAM_EBI3_MARCO |                                           |            |                                                                                 |    |
| SPIC       | 0.41378525  | 5.41E-22 | M2_TAM_EBI3_MARCO |                                           |            |                                                                                 |    |
| IRF8       | 1.266836644 | 1.28E-21 | M2_TAM_EBI3_MARCO |                                           |            |                                                                                 |    |
| CYBA       | 0.905310736 | 3.47E-21 | M2_TAM_EBI3_MARCO |                                           |            |                                                                                 |    |
| RNASET2    | 0.990926562 | 3.97E-21 | M2_TAM_EBI3_MARCO |                                           |            |                                                                                 |    |
| CXCL10     | 1.541347775 | 5.21E-21 | M2_TAM_EBI3_MARCO |                                           |            |                                                                                 |    |
| SAMSN1     | 0.909250179 | 1.67E-20 | M2_TAM_EBI3_MARCO |                                           |            |                                                                                 |    |
| HLA-A      | 0.800601927 | 2.50E-20 | M2_TAM_EBI3_MARCO |                                           |            |                                                                                 |    |
| KMO        | 0.42310167  | 3.03E-20 | M2_TAM_EBI3_MARCO |                                           |            |                                                                                 |    |
| PROS1      | 0.251679214 | 3.65E-20 | M2_TAM_EBI3_MARCO |                                           |            |                                                                                 |    |
| EBI3       | 0.72454334  | 3.69E-20 | M2_TAM_EBI3_MARCO |                                           |            |                                                                                 |    |
| CALHM6     | 0.901055849 | 5.14E-20 | M2_TAM_EBI3_MARCO |                                           |            |                                                                                 |    |
| AC110995.1 | 0.391020618 | 6.46E-20 | M2_TAM_EBI3_MARCO |                                           |            |                                                                                 |    |
| CD82       | 0.538400369 | 7.66E-20 | M2_TAM_EBI3_MARCO |                                           |            |                                                                                 |    |
| FCGR3A     | 1.120798677 | 8.18E-20 | M2_TAM_EBI3_MARCO |                                           |            |                                                                                 |    |
| SAA1       | 0.825911629 | 1.19E-19 | M2_TAM_EBI3_MARCO |                                           |            |                                                                                 |    |
| PRCP       | 0.759538272 | 1.34E-19 | M2_TAM_EBI3_MARCO |                                           |            |                                                                                 |    |
| CD81       | 0.861896973 | 1.65E-19 | M2_TAM_EBI3_MARCO |                                           |            |                                                                                 |    |
| SLCO4A1    | 0.276632638 | 6.71E-19 | M2_TAM_EBI3_MARCO |                                           |            |                                                                                 |    |
| TNFAIP8    | 0.653284834 | 7.52E-19 | M2_TAM_EBI3_MARCO |                                           |            |                                                                                 |    |
| HLA-E      | 0.761957557 | 7.87E-19 | M2_TAM_EBI3_MARCO |                                           |            |                                                                                 |    |
| ICAM1      | 1.64823633  | 9.01E-19 | M2_TAM_EBI3_MARCO |                                           |            |                                                                                 |    |
| B2M        | 0.577654617 | 1.00E-18 | M2_TAM_EBI3_MARCO |                                           |            |                                                                                 |    |
| CD63       | 0.907265856 | 3.36E-18 | M2_TAM_EBI3_MARCO |                                           |            |                                                                                 |    |
| SOD2       | 1.071746851 | 4.52E-18 | M2_TAM_EBI3_MARCO |                                           |            |                                                                                 |    |
| PLEK       | 1.099852333 | 4.94E-18 | M2_TAM_EBI3_MARCO |                                           |            |                                                                                 |    |
| ACP2       | 0.504231229 | 7.25E-18 | M2_TAM_EBI3_MARCO |                                           |            |                                                                                 |    |
| CCL3       | 1.239189197 | 7.78E-18 | M2_TAM_EBI3_MARCO |                                           |            |                                                                                 |    |
| CCL20      | 1.020894893 | 1.05E-17 | M2_TAM_EBI3_MARCO |                                           |            |                                                                                 |    |
| PRDX1      | 0.825948486 | 1.18E-17 | M2_TAM_EBI3_MARCO |                                           |            |                                                                                 |    |
| P4HA1      | 0.558469777 | 1.48E-17 | M2_TAM_EBI3_MARCO |                                           |            |                                                                                 |    |
| RGL1       | 0.748901626 | 1.68E-17 | M2_TAM_EBI3_MARCO |                                           |            |                                                                                 |    |
| TMEM123    | 0.698301213 | 2.08E-17 | M2_TAM_EBI3_MARCO |                                           |            |                                                                                 |    |
| SIGLEC1    | 0.603366376 | 2.52E-17 | M2_TAM_EBI3_MARCO |                                           |            |                                                                                 |    |
| COMT       | 0.754614394 | 3.11E-17 | M2_TAM_EBI3_MARCO |                                           |            |                                                                                 |    |
| CFD        | 1.038365442 | 3.62E-17 | M2_TAM_EBI3_MARCO |                                           |            |                                                                                 |    |
| BIRC3      | 1.025587913 | 3.62E-17 | M2_TAM_EBI3_MARCO |                                           |            |                                                                                 |    |
| MMD        | 0.585723473 | 4.02E-17 | M2_TAM_EBI3_MARCO |                                           |            |                                                                                 |    |
| SUCNR1     | 0.366918904 | 5.77E-17 | M2_TAM_EBI3_MARCO |                                           |            |                                                                                 |    |
| LILRB4     | 0.542292076 | 6.19E-17 | M2_TAM_EBI3_MARCO |                                           |            |                                                                                 |    |
| MRC1       | 1.08435329  | 6.23E-17 | M2_TAM_EBI3_MARCO |                                           |            |                                                                                 |    |
| TIMP1      | 0.84954535  | 6.63E-17 | M2_TAM_EBI3_MARCO |                                           |            |                                                                                 |    |
| SOCS3      | 0.87996862  | 1.21E-16 | M2_TAM_EBI3_MARCO |                                           |            |                                                                                 |    |
| LILRB1     | 0.769421593 | 1.29E-16 | M2_TAM_EBI3_MARCO |                                           |            |                                                                                 |    |
| PTGER4     | 0.674401607 | 1.40E-16 | M2_TAM_EBI3_MARCO |                                           |            |                                                                                 |    |
| SLC39A8    | 0.537569986 | 3.69E-16 | M2_TAM_EBI3_MARCO |                                           |            |                                                                                 |    |

|           |             |          |                   |
|-----------|-------------|----------|-------------------|
| MARCKS    | 0.934503806 | 4.11E-16 | M2_TAM_EBI3_MARCO |
| IGSF6     | 0.983292044 | 8.02E-16 | M2_TAM_EBI3_MARCO |
| LGALS3BP  | 0.470255536 | 1.04E-15 | M2_TAM_EBI3_MARCO |
| USP12     | 0.396250487 | 1.06E-15 | M2_TAM_EBI3_MARCO |
| CCR1      | 0.665805084 | 1.09E-15 | M2_TAM_EBI3_MARCO |
| ARHGAP31  | 0.28827643  | 1.80E-15 | M2_TAM_EBI3_MARCO |
| ATP11C    | 0.312996723 | 1.84E-15 | M2_TAM_EBI3_MARCO |
| C1orf162  | 0.722481067 | 2.08E-15 | M2_TAM_EBI3_MARCO |
| LILRB5    | 0.810316254 | 2.71E-15 | M2_TAM_EBI3_MARCO |
| PIK3AP1   | 0.616710454 | 3.56E-15 | M2_TAM_EBI3_MARCO |
| PHACTR2   | 0.588591509 | 3.76E-15 | M2_TAM_EBI3_MARCO |
| CD68      | 0.72864486  | 3.84E-15 | M2_TAM_EBI3_MARCO |
| SCARB2    | 0.69123847  | 4.14E-15 | M2_TAM_EBI3_MARCO |
| RNF144B   | 0.706642766 | 5.36E-15 | M2_TAM_EBI3_MARCO |
| ACVRL1    | 0.285726602 | 8.79E-15 | M2_TAM_EBI3_MARCO |
| TNFSF10   | 0.522197479 | 1.65E-14 | M2_TAM_EBI3_MARCO |
| MIR3945HG | 0.663554285 | 1.71E-14 | M2_TAM_EBI3_MARCO |
| ABCA1     | 0.793190671 | 1.93E-14 | M2_TAM_EBI3_MARCO |
| SCIMP     | 0.523722661 | 2.09E-14 | M2_TAM_EBI3_MARCO |
| GUSB      | 0.569372479 | 3.61E-14 | M2_TAM_EBI3_MARCO |
| RUFY3     | 0.487157715 | 4.73E-14 | M2_TAM_EBI3_MARCO |
| HMBOX1    | 0.799555172 | 4.96E-14 | M2_TAM_EBI3_MARCO |
| RAB32     | 0.715437361 | 5.67E-14 | M2_TAM_EBI3_MARCO |
| PLD3      | 0.805803509 | 6.13E-14 | M2_TAM_EBI3_MARCO |
| IFI6      | 0.757728333 | 7.59E-14 | M2_TAM_EBI3_MARCO |
| BCL6      | 0.529405842 | 7.65E-14 | M2_TAM_EBI3_MARCO |
| HSD17B12  | 0.353148515 | 8.68E-14 | M2_TAM_EBI3_MARCO |
| TPP1      | 0.833205629 | 9.66E-14 | M2_TAM_EBI3_MARCO |
| UGCG      | 0.56245477  | 1.08E-13 | M2_TAM_EBI3_MARCO |
| SAA2      | 0.464769178 | 1.11E-13 | M2_TAM_EBI3_MARCO |
| SLC2A6    | 0.365673666 | 1.22E-13 | M2_TAM_EBI3_MARCO |
| NFKBIE    | 0.388149246 | 1.22E-13 | M2_TAM_EBI3_MARCO |
| EHD1      | 0.772411622 | 1.24E-13 | M2_TAM_EBI3_MARCO |
| TNFAIP2   | 1.109564723 | 1.25E-13 | M2_TAM_EBI3_MARCO |
| EGR1      | 0.926125231 | 1.39E-13 | M2_TAM_EBI3_MARCO |
| ORM1      | 0.634826817 | 1.81E-13 | M2_TAM_EBI3_MARCO |
| VAMP8     | 0.654746708 | 8.32E-13 | M2_TAM_EBI3_MARCO |
| HNMT      | 0.543173873 | 1.33E-12 | M2_TAM_EBI3_MARCO |
| PLTP      | 0.597804041 | 1.49E-12 | M2_TAM_EBI3_MARCO |
| DMXL2     | 0.573105916 | 1.77E-12 | M2_TAM_EBI3_MARCO |
| LY96      | 0.633258058 | 2.37E-12 | M2_TAM_EBI3_MARCO |
| NBPF19    | 0.498046031 | 2.53E-12 | M2_TAM_EBI3_MARCO |
| MIR3142HG | 0.257978275 | 3.01E-12 | M2_TAM_EBI3_MARCO |
| RFK       | 0.316364873 | 3.13E-12 | M2_TAM_EBI3_MARCO |
| HLA-DRA   | 0.665929056 | 3.46E-12 | M2_TAM_EBI3_MARCO |
| KYNU      | 0.473719341 | 5.12E-12 | M2_TAM_EBI3_MARCO |
| ARID5B    | 0.547935448 | 5.49E-12 | M2_TAM_EBI3_MARCO |
| CYBB      | 0.773966241 | 6.76E-12 | M2_TAM_EBI3_MARCO |
| TNF       | 1.623343146 | 7.89E-12 | M2_TAM_EBI3_MARCO |
| ACSL1     | 0.730058268 | 1.16E-11 | M2_TAM_EBI3_MARCO |
| GNG10     | 0.563638546 | 1.22E-11 | M2_TAM_EBI3_MARCO |
| AOAH      | 0.442047697 | 1.27E-11 | M2_TAM_EBI3_MARCO |
| GLRX      | 0.556926218 | 1.70E-11 | M2_TAM_EBI3_MARCO |
| NPL       | 0.505601309 | 2.41E-11 | M2_TAM_EBI3_MARCO |
| PDE4B     | 0.578355691 | 2.70E-11 | M2_TAM_EBI3_MARCO |
| CNDP2     | 0.528665923 | 2.71E-11 | M2_TAM_EBI3_MARCO |
| CXCL3     | 1.561503528 | 3.55E-11 | M2_TAM_EBI3_MARCO |
| HLA-B     | 0.538534214 | 3.93E-11 | M2_TAM_EBI3_MARCO |
| UBE2D1    | 0.548594083 | 4.93E-11 | M2_TAM_EBI3_MARCO |
| TFEC      | 0.427215175 | 5.58E-11 | M2_TAM_EBI3_MARCO |
| PFKFB3    | 0.757257935 | 8.99E-11 | M2_TAM_EBI3_MARCO |
| GRAMD1A   | 0.458860263 | 9.24E-11 | M2_TAM_EBI3_MARCO |
| DNASE2    | 0.412042204 | 9.57E-11 | M2_TAM_EBI3_MARCO |
| MPEG1     | 0.74102372  | 1.08E-10 | M2_TAM_EBI3_MARCO |

|           |             |          |                   |
|-----------|-------------|----------|-------------------|
| GST3      | 0.574873151 | 1.15E-10 | M2_TAM_EBI3_MARCO |
| NCK1      | 0.325013449 | 1.21E-10 | M2_TAM_EBI3_MARCO |
| PLA2G7    | 0.571736275 | 1.38E-10 | M2_TAM_EBI3_MARCO |
| HLA-DRB1  | 0.77543641  | 2.76E-10 | M2_TAM_EBI3_MARCO |
| SKIL      | 0.45527516  | 2.81E-10 | M2_TAM_EBI3_MARCO |
| HCAR2     | 0.274800596 | 3.16E-10 | M2_TAM_EBI3_MARCO |
| ZBTB10    | 0.362479303 | 3.60E-10 | M2_TAM_EBI3_MARCO |
| IFIT3     | 0.297029332 | 3.92E-10 | M2_TAM_EBI3_MARCO |
| TSPAN4    | 0.623637377 | 4.27E-10 | M2_TAM_EBI3_MARCO |
| LYVE1     | 0.948804051 | 4.79E-10 | M2_TAM_EBI3_MARCO |
| HLA-C     | 0.536593891 | 4.88E-10 | M2_TAM_EBI3_MARCO |
| C15orf48  | 0.975331274 | 5.12E-10 | M2_TAM_EBI3_MARCO |
| RPS29     | 0.517875096 | 5.49E-10 | M2_TAM_EBI3_MARCO |
| RPL27A    | 0.526676406 | 5.95E-10 | M2_TAM_EBI3_MARCO |
| ADM       | 0.449865525 | 6.69E-10 | M2_TAM_EBI3_MARCO |
| MAP3K8    | 0.780233256 | 8.14E-10 | M2_TAM_EBI3_MARCO |
| CCL23     | 0.334893524 | 9.16E-10 | M2_TAM_EBI3_MARCO |
| TRPV4     | 0.342824725 | 1.15E-09 | M2_TAM_EBI3_MARCO |
| MRC2      | 0.267019862 | 1.37E-09 | M2_TAM_EBI3_MARCO |
| RPS20     | 0.542469103 | 1.44E-09 | M2_TAM_EBI3_MARCO |
| CTSZ      | 0.734133288 | 1.54E-09 | M2_TAM_EBI3_MARCO |
| VAMP5     | 0.584962501 | 1.76E-09 | M2_TAM_EBI3_MARCO |
| TRIM14    | 0.404695555 | 1.81E-09 | M2_TAM_EBI3_MARCO |
| RPL23     | 0.555167819 | 1.99E-09 | M2_TAM_EBI3_MARCO |
| LGALS8    | 0.372119778 | 2.13E-09 | M2_TAM_EBI3_MARCO |
| IRF1      | 0.731279157 | 2.25E-09 | M2_TAM_EBI3_MARCO |
| SIGLEC7   | 0.413709702 | 2.30E-09 | M2_TAM_EBI3_MARCO |
| FMNL2     | 0.464702864 | 2.71E-09 | M2_TAM_EBI3_MARCO |
| EPB41L3   | 0.495656102 | 4.59E-09 | M2_TAM_EBI3_MARCO |
| MYD88     | 0.366744539 | 6.00E-09 | M2_TAM_EBI3_MARCO |
| HLA-DQA1  | 0.641058626 | 7.27E-09 | M2_TAM_EBI3_MARCO |
| LY6E      | 0.565751502 | 7.52E-09 | M2_TAM_EBI3_MARCO |
| GNB4      | 0.468918937 | 7.53E-09 | M2_TAM_EBI3_MARCO |
| RPS9      | 0.441630693 | 8.27E-09 | M2_TAM_EBI3_MARCO |
| CTBS      | 0.324728757 | 1.01E-08 | M2_TAM_EBI3_MARCO |
| CTSL      | 0.78211752  | 1.04E-08 | M2_TAM_EBI3_MARCO |
| STAT1     | 0.556534092 | 1.20E-08 | M2_TAM_EBI3_MARCO |
| FNDC3B    | 0.323947666 | 1.34E-08 | M2_TAM_EBI3_MARCO |
| IFI44L    | 0.384203579 | 1.35E-08 | M2_TAM_EBI3_MARCO |
| TNFSF13B  | 0.46672651  | 1.46E-08 | M2_TAM_EBI3_MARCO |
| FABP3     | 0.436618223 | 1.49E-08 | M2_TAM_EBI3_MARCO |
| CCND1     | 0.438888929 | 1.80E-08 | M2_TAM_EBI3_MARCO |
| IFNAR1    | 0.394373084 | 2.33E-08 | M2_TAM_EBI3_MARCO |
| HLA-DPA1  | 0.515538577 | 2.36E-08 | M2_TAM_EBI3_MARCO |
| RPN2      | 0.473262723 | 2.81E-08 | M2_TAM_EBI3_MARCO |
| RNF19B    | 0.37199139  | 2.96E-08 | M2_TAM_EBI3_MARCO |
| PYGL      | 0.370387504 | 3.49E-08 | M2_TAM_EBI3_MARCO |
| FILIP1L   | 0.350813312 | 4.65E-08 | M2_TAM_EBI3_MARCO |
| RPS6      | 0.458238816 | 4.69E-08 | M2_TAM_EBI3_MARCO |
| APOE      | 0.808095718 | 5.38E-08 | M2_TAM_EBI3_MARCO |
| FCHO2     | 0.39322513  | 6.32E-08 | M2_TAM_EBI3_MARCO |
| PCBP1-AS1 | 0.250761573 | 6.70E-08 | M2_TAM_EBI3_MARCO |
| BATF      | 0.341617741 | 8.45E-08 | M2_TAM_EBI3_MARCO |
| FEZ2      | 0.402747941 | 9.33E-08 | M2_TAM_EBI3_MARCO |
| HLA-DRB5  | 0.586013698 | 9.45E-08 | M2_TAM_EBI3_MARCO |
| CORO1B    | 0.478946306 | 1.15E-07 | M2_TAM_EBI3_MARCO |
| PRKAR1A   | 0.424317687 | 1.15E-07 | M2_TAM_EBI3_MARCO |
| EPST11    | 0.365697789 | 1.18E-07 | M2_TAM_EBI3_MARCO |
| NECTIN2   | 0.289636604 | 1.26E-07 | M2_TAM_EBI3_MARCO |
| NCEH1     | 0.341589276 | 1.31E-07 | M2_TAM_EBI3_MARCO |
| VMO1      | 0.634712034 | 1.53E-07 | M2_TAM_EBI3_MARCO |
| NCOA4     | 0.566432708 | 1.66E-07 | M2_TAM_EBI3_MARCO |
| ABCG1     | 0.268233313 | 1.68E-07 | M2_TAM_EBI3_MARCO |
| ZFYVE16   | 0.445462833 | 1.70E-07 | M2_TAM_EBI3_MARCO |

|           |             |          |                   |
|-----------|-------------|----------|-------------------|
| XBP1      | 0.464493472 | 2.48E-07 | M2_TAM_EBI3_MARCO |
| ADGRE1    | 0.26003911  | 2.65E-07 | M2_TAM_EBI3_MARCO |
| CCL3L1    | 0.743597884 | 2.77E-07 | M2_TAM_EBI3_MARCO |
| CEBPD     | 0.498620397 | 3.36E-07 | M2_TAM_EBI3_MARCO |
| RAP1B     | 0.423875217 | 3.73E-07 | M2_TAM_EBI3_MARCO |
| ATP2B1    | 0.625057727 | 3.82E-07 | M2_TAM_EBI3_MARCO |
| RPS18     | 0.394599221 | 3.86E-07 | M2_TAM_EBI3_MARCO |
| MSR1      | 0.494790292 | 4.76E-07 | M2_TAM_EBI3_MARCO |
| ANXA5     | 0.520203429 | 5.10E-07 | M2_TAM_EBI3_MARCO |
| PRNP      | 0.534215254 | 5.53E-07 | M2_TAM_EBI3_MARCO |
| IL1A      | 0.406483181 | 5.74E-07 | M2_TAM_EBI3_MARCO |
| JUN       | 0.553713038 | 6.77E-07 | M2_TAM_EBI3_MARCO |
| CD59      | 0.532111211 | 6.95E-07 | M2_TAM_EBI3_MARCO |
| OAS2      | 0.286790239 | 7.76E-07 | M2_TAM_EBI3_MARCO |
| DNASE1L3  | 0.348474373 | 7.84E-07 | M2_TAM_EBI3_MARCO |
| CD52      | 0.700511797 | 8.68E-07 | M2_TAM_EBI3_MARCO |
| FRMD4A    | 0.36872849  | 1.01E-06 | M2_TAM_EBI3_MARCO |
| E2F3      | 0.296992561 | 1.02E-06 | M2_TAM_EBI3_MARCO |
| NABP1     | 0.582035487 | 1.03E-06 | M2_TAM_EBI3_MARCO |
| MAFF      | 0.530880869 | 1.04E-06 | M2_TAM_EBI3_MARCO |
| GRB2      | 0.460434341 | 1.05E-06 | M2_TAM_EBI3_MARCO |
| ETNK1     | 0.324106001 | 1.09E-06 | M2_TAM_EBI3_MARCO |
| TRIB1     | 0.409224296 | 1.27E-06 | M2_TAM_EBI3_MARCO |
| NUCB1     | 0.380439335 | 1.52E-06 | M2_TAM_EBI3_MARCO |
| GPNMB     | 0.674847051 | 1.59E-06 | M2_TAM_EBI3_MARCO |
| LIMK2     | 0.264007775 | 1.64E-06 | M2_TAM_EBI3_MARCO |
| SQOR      | 0.361336479 | 2.14E-06 | M2_TAM_EBI3_MARCO |
| APOL3     | 0.373174697 | 2.28E-06 | M2_TAM_EBI3_MARCO |
| SAT1      | 0.517123037 | 2.30E-06 | M2_TAM_EBI3_MARCO |
| SRGN      | 0.587576044 | 2.40E-06 | M2_TAM_EBI3_MARCO |
| N4BP1     | 0.314989369 | 2.54E-06 | M2_TAM_EBI3_MARCO |
| AZIN1-AS1 | 0.689440959 | 2.54E-06 | M2_TAM_EBI3_MARCO |
| SLC40A1   | 0.757016448 | 2.65E-06 | M2_TAM_EBI3_MARCO |
| LY86      | 0.385377795 | 2.75E-06 | M2_TAM_EBI3_MARCO |
| P2RY13    | 0.26374765  | 2.90E-06 | M2_TAM_EBI3_MARCO |
| SCN1B     | 0.295594118 | 3.22E-06 | M2_TAM_EBI3_MARCO |
| GNS       | 0.430999711 | 3.54E-06 | M2_TAM_EBI3_MARCO |
| ARRDC3    | 0.364927997 | 4.13E-06 | M2_TAM_EBI3_MARCO |
| GBP2      | 0.516414029 | 4.77E-06 | M2_TAM_EBI3_MARCO |
| FOLR2     | 0.609731841 | 6.28E-06 | M2_TAM_EBI3_MARCO |
| PTAFR     | 0.321418101 | 6.29E-06 | M2_TAM_EBI3_MARCO |
| PLK3      | 0.3495773   | 6.37E-06 | M2_TAM_EBI3_MARCO |
| OPTN      | 0.251095677 | 6.53E-06 | M2_TAM_EBI3_MARCO |
| PTTG1IP   | 0.346928531 | 8.94E-06 | M2_TAM_EBI3_MARCO |
| ABI1      | 0.358805648 | 8.97E-06 | M2_TAM_EBI3_MARCO |
| HLA-DQB1  | 0.5704596   | 9.55E-06 | M2_TAM_EBI3_MARCO |
| TLR2      | 0.34827718  | 1.08E-05 | M2_TAM_EBI3_MARCO |
| AKR1A1    | 0.375673118 | 1.24E-05 | M2_TAM_EBI3_MARCO |
| SLC8A1    | 0.329477095 | 1.31E-05 | M2_TAM_EBI3_MARCO |
| BST2      | 0.492786885 | 1.32E-05 | M2_TAM_EBI3_MARCO |
| IFNGR2    | 0.448458381 | 1.43E-05 | M2_TAM_EBI3_MARCO |
| HLA-DPB1  | 0.429327415 | 1.45E-05 | M2_TAM_EBI3_MARCO |
| CD84      | 0.404591939 | 1.82E-05 | M2_TAM_EBI3_MARCO |
| PDIA6     | 0.389717823 | 1.83E-05 | M2_TAM_EBI3_MARCO |
| HIF1A     | 0.528740195 | 2.08E-05 | M2_TAM_EBI3_MARCO |
| WTAP      | 0.545594944 | 2.20E-05 | M2_TAM_EBI3_MARCO |
| CLEC12A   | 0.265842299 | 2.35E-05 | M2_TAM_EBI3_MARCO |
| HP        | 0.744055861 | 2.39E-05 | M2_TAM_EBI3_MARCO |
| TYMP      | 0.469680079 | 2.40E-05 | M2_TAM_EBI3_MARCO |
| NCF1      | 0.488961823 | 2.60E-05 | M2_TAM_EBI3_MARCO |
| FXYD2     | 0.29150876  | 3.00E-05 | M2_TAM_EBI3_MARCO |
| CTSA      | 0.441254765 | 3.00E-05 | M2_TAM_EBI3_MARCO |
| GALNT1    | 0.307243196 | 3.12E-05 | M2_TAM_EBI3_MARCO |
| TAGLN2    | 0.414716142 | 3.25E-05 | M2_TAM_EBI3_MARCO |

|          |             |            |                   |
|----------|-------------|------------|-------------------|
| TPT1     | 0.27204806  | 4.35E-05   | M2_TAM_EBI3_MARCO |
| P2RX7    | 0.435338704 | 4.53E-05   | M2_TAM_EBI3_MARCO |
| CHMP5    | 0.328754134 | 4.76E-05   | M2_TAM_EBI3_MARCO |
| SHTN1    | 0.374440537 | 5.16E-05   | M2_TAM_EBI3_MARCO |
| ATP6AP2  | 0.399846155 | 6.18E-05   | M2_TAM_EBI3_MARCO |
| BCL2L1   | 0.28784355  | 7.04E-05   | M2_TAM_EBI3_MARCO |
| QKI      | 0.453522839 | 7.51E-05   | M2_TAM_EBI3_MARCO |
| GAA      | 0.350804189 | 7.89E-05   | M2_TAM_EBI3_MARCO |
| BAZ1A    | 0.42512227  | 9.97E-05   | M2_TAM_EBI3_MARCO |
| JAK1     | 0.428165432 | 0.00010028 | M2_TAM_EBI3_MARCO |
| RPS11    | 0.311181811 | 0.00012681 | M2_TAM_EBI3_MARCO |
| RPL26    | 0.341951134 | 0.00014676 | M2_TAM_EBI3_MARCO |
| HLA-DMA  | 0.4209681   | 0.00015124 | M2_TAM_EBI3_MARCO |
| ETS2     | 0.374974665 | 0.00015167 | M2_TAM_EBI3_MARCO |
| THBS1    | 0.562331768 | 0.00015766 | M2_TAM_EBI3_MARCO |
| TMSB10   | 0.334324407 | 0.00016097 | M2_TAM_EBI3_MARCO |
| EVA1B    | 0.274287609 | 0.00017555 | M2_TAM_EBI3_MARCO |
| DOCK10   | 0.277697476 | 0.00018741 | M2_TAM_EBI3_MARCO |
| TMEM37   | 0.255135178 | 0.00018869 | M2_TAM_EBI3_MARCO |
| RBP7     | 0.404576907 | 0.00019343 | M2_TAM_EBI3_MARCO |
| BHLHE40  | 0.420855848 | 0.00021081 | M2_TAM_EBI3_MARCO |
| MPP1     | 0.381087393 | 0.00021352 | M2_TAM_EBI3_MARCO |
| SELENOT  | 0.323760865 | 0.00022104 | M2_TAM_EBI3_MARCO |
| SPATS2L  | 0.392107964 | 0.00023687 | M2_TAM_EBI3_MARCO |
| MTPN     | 0.367375961 | 0.00025391 | M2_TAM_EBI3_MARCO |
| IQGAP1   | 0.497905255 | 0.00025578 | M2_TAM_EBI3_MARCO |
| FKBP5    | 0.304466111 | 0.00028457 | M2_TAM_EBI3_MARCO |
| YBX1     | 0.368688261 | 0.00033707 | M2_TAM_EBI3_MARCO |
| MIR155HG | 0.576283606 | 0.00034926 | M2_TAM_EBI3_MARCO |
| WSB1     | 0.862409564 | 0.00038895 | M2_TAM_EBI3_MARCO |
| CD300A   | 0.30547239  | 0.00039067 | M2_TAM_EBI3_MARCO |
| CXCL1    | 1.129802065 | 0.00042529 | M2_TAM_EBI3_MARCO |
| HCLS1    | 0.447490313 | 0.0004467  | M2_TAM_EBI3_MARCO |
| GRN      | 0.477744704 | 0.00047568 | M2_TAM_EBI3_MARCO |
| SUMF2    | 0.261471279 | 0.00050649 | M2_TAM_EBI3_MARCO |
| TAX1BP1  | 0.327209675 | 0.00057271 | M2_TAM_EBI3_MARCO |
| GTF2A2   | 0.296978549 | 0.00068117 | M2_TAM_EBI3_MARCO |
| HNRNPAB  | 0.368662824 | 0.00072588 | M2_TAM_EBI3_MARCO |
| M6PR     | 0.416239893 | 0.00072634 | M2_TAM_EBI3_MARCO |
| MFHAS1   | 0.353543143 | 0.00074447 | M2_TAM_EBI3_MARCO |
| CSF1R    | 0.479735527 | 0.0007563  | M2_TAM_EBI3_MARCO |
| DICER1   | 0.360549592 | 0.00080604 | M2_TAM_EBI3_MARCO |
| PSMA6    | 0.357421054 | 0.00085776 | M2_TAM_EBI3_MARCO |
| TNFSF9   | 0.383868365 | 0.00091146 | M2_TAM_EBI3_MARCO |
| GIMAP5   | 0.3203066   | 0.00097241 | M2_TAM_EBI3_MARCO |
| CD164    | 0.361891233 | 0.00111819 | M2_TAM_EBI3_MARCO |
| AKR1B1   | 0.378614902 | 0.00117494 | M2_TAM_EBI3_MARCO |
| PTPRJ    | 0.286103462 | 0.00118019 | M2_TAM_EBI3_MARCO |
| METTL7A  | 0.319630364 | 0.00129014 | M2_TAM_EBI3_MARCO |
| CLIC4    | 0.256850087 | 0.00150709 | M2_TAM_EBI3_MARCO |
| IL1RN    | 0.916079196 | 0.00159252 | M2_TAM_EBI3_MARCO |
| ATP1B1   | 0.449504187 | 0.00165487 | M2_TAM_EBI3_MARCO |
| BLOC1S2  | 0.312566262 | 0.00166573 | M2_TAM_EBI3_MARCO |
| RIPK2    | 0.305359025 | 0.00186016 | M2_TAM_EBI3_MARCO |
| MXD1     | 0.468757263 | 0.00190728 | M2_TAM_EBI3_MARCO |
| CALCOCO2 | 0.298452123 | 0.00193579 | M2_TAM_EBI3_MARCO |
| SLC31A2  | 0.282069297 | 0.00198686 | M2_TAM_EBI3_MARCO |
| IRAK2    | 0.252997826 | 0.00220585 | M2_TAM_EBI3_MARCO |
| DENND2D  | 0.254784841 | 0.00229064 | M2_TAM_EBI3_MARCO |
| MAN2B1   | 0.41738207  | 0.00241382 | M2_TAM_EBI3_MARCO |
| ACTR3    | 0.369603891 | 0.00248933 | M2_TAM_EBI3_MARCO |
| RPL21    | 0.308952694 | 0.00253145 | M2_TAM_EBI3_MARCO |
| RAC1     | 0.311378404 | 0.00254719 | M2_TAM_EBI3_MARCO |
| LAMP2    | 0.316538944 | 0.00262239 | M2_TAM_EBI3_MARCO |



|         |             |            |                   |
|---------|-------------|------------|-------------------|
| FPR1    | 0.308555439 | 0.00273321 | M2_TAM_EBI3_MARCO |
| CALML4  | 0.284401321 | 0.00278263 | M2_TAM_EBI3_MARCO |
| SLC7A7  | 0.304456143 | 0.0029627  | M2_TAM_EBI3_MARCO |
| ITM2B   | 0.325111286 | 0.00315342 | M2_TAM_EBI3_MARCO |
| DBNL    | 0.282101713 | 0.00333459 | M2_TAM_EBI3_MARCO |
| HIVEP1  | 0.276800286 | 0.00338584 | M2_TAM_EBI3_MARCO |
| TNFAIP3 | 0.775166276 | 0.0037196  | M2_TAM_EBI3_MARCO |
| RASSF4  | 0.307717646 | 0.00382185 | M2_TAM_EBI3_MARCO |
| GADD45B | 0.431831685 | 0.00387471 | M2_TAM_EBI3_MARCO |
| VASP    | 0.418818919 | 0.00411874 | M2_TAM_EBI3_MARCO |
| NFKBIZ  | 0.578563051 | 0.00415357 | M2_TAM_EBI3_MARCO |
| SLAMF7  | 0.56712602  | 0.00445355 | M2_TAM_EBI3_MARCO |
| RAB10   | 0.308105582 | 0.00445993 | M2_TAM_EBI3_MARCO |
| ARPC5   | 0.399306464 | 0.00489808 | M2_TAM_EBI3_MARCO |
| EIF3D   | 0.335572734 | 0.00492836 | M2_TAM_EBI3_MARCO |
| ISG15   | 0.497979607 | 0.00518346 | M2_TAM_EBI3_MARCO |
| TGOLN2  | 0.342922702 | 0.0054537  | M2_TAM_EBI3_MARCO |
| FNBP1   | 0.325650407 | 0.00548985 | M2_TAM_EBI3_MARCO |
| ICAM4   | 0.497296162 | 0.00572174 | M2_TAM_EBI3_MARCO |
| RELB    | 0.258235965 | 0.00584092 | M2_TAM_EBI3_MARCO |
| CSF3R   | 0.253285675 | 0.00662085 | M2_TAM_EBI3_MARCO |
| RAP2B   | 0.388842831 | 0.007651   | M2_TAM_EBI3_MARCO |
| NDUFA4  | 0.304436037 | 0.00799365 | M2_TAM_EBI3_MARCO |
| CANX    | 0.358016475 | 0.00859784 | M2_TAM_EBI3_MARCO |

---

Table S7. Differential expression genes and enrichment pathways of CD8+T cells subpopulations of HCC 4 and CIR 4. (related to Figure 5)

a. CD8.T\_CST3\_AIF1

| Gene symbol | avg_log2FC  | p_val_adj | Upregulated group | Description                         | pvalue   | geneID                                                                                                                                                                                                                                                                                                                                     | Count |
|-------------|-------------|-----------|-------------------|-------------------------------------|----------|--------------------------------------------------------------------------------------------------------------------------------------------------------------------------------------------------------------------------------------------------------------------------------------------------------------------------------------------|-------|
| LYZ         | 2.790595419 | 0         | CD8.T_CST3_AIF1   | Phagosome                           | 7.48E-24 | ACTB/ATP6V1B2/ATP6V0C/ATP6V0B/ATP6V0A1/CD14/SCARB1/CTSL/CTSS/CYBB/DYNC1H1/FCGR1A/FCGR2A/HLA-DMA/HLA-DMB/HLA-DOA/HLA-DPA1/HLA-DPB1/HLA-DQA1/HLA-DQB1/HLA-DRA/HLA-DRB1/HLA-DRB5/ITGB5/LAMP2/M6PR/MRC1/MSR1/NCF2/NCF4/RAB5C/RAC1/TLR4/TUBA1A/RAB7A/STX7/ATP6V0D1/ATP6V1F/AMP3/TUBA1B/TUBB4B/CD209/CLEC7A/COLEC12/TUBB6/TUBA1C/TUBB/RAB7B/NCF1 | 49    |
| TOP2A       | 2.13385835  | 0         | CD8.T_CST3_AIF1   | Lysosome                            | 3.07E-21 | AP1B1/ASAH1/ATP6V0C/ATP6V0B/ATP6V0A1/SCARB2/CD63/CD68/PPP1/CLTA/CLTC/CTSB/CTSD/CTSH/CTSL/CTSS/CTS2/FUCA2/GAA/GBA/GLA/GM2A/GNS/GUSB/HEXA/HEXB/LAMP2/LIPA/M6PR/MAN2B1/NAGA/SLC11A2/CTSA/PPT1/LGMN/PSAP/LAPTM5/AP1S2/AP1M1/ATP6V0D1/NPC2/DMXL2/MCOLN1                                                                                         | 43    |
| CPVL        | 1.958272641 | 0         | CD8.T_CST3_AIF1   | Rheumatoid arthritis                | 6.14E-16 | ATP6V1B2/ATP6V0C/ATP6V0B/ATP6V0A1/CD86/CTSL/FOS/CXCL1/CXCL2/CXCL3/HLA-DMA/HLA-DMB/HLA-DOA/HLA-DPA1/HLA-DPB1/HLA-DQA1/HLA-DQB1/HLA-DRA/HLA-DRB1/HLA-DRB5/IL1B/CXCL8/IL18/CCL2/CCL3/CCL3L1/TLR4/VEGFA/TNFSF13/ATP6V0D1/ATP6V1F                                                                                                               | 31    |
| MS4A6A      | 1.875807831 | 0         | CD8.T_CST3_AIF1   | Tuberculosis                        | 1.27E-15 | AKT1/RHOA/ATP6V0C/ATP6V0B/ATP6V0A1/CALM2/CALM3/CD14/CD74/CEBPB/CTSD/CTSS/FCER1G/FCGR1A/FCGR2A/HLA-DMA/HLA-DMB/HLA-DOA/HLA-DPA1/HLA-DPB1/HLA-DQA1/HLA-DQB1/HLA-DRA/HLA-DRB1/HLA-DRB5/IFNGR1/IFNGR2/IL1B/IL10/IL10RB/IL18/IRAK1/ITGAX/LAMP2/MRC1/MYD88/RAB5C/SYK/TLR4/RAB7A/ATP6V0D1/CD209/CLEC7A                                            | 43    |
| UBE2C       | 1.776380316 | 0         | CD8.T_CST3_AIF1   | Leishmaniasis                       | 8.52E-13 | CYBB/FCGR1A/FCGR2A/FOS/HLA-DMA/HLA-DMB/HLA-DOA/HLA-DPA1/HLA-DPB1/HLA-DQA1/HLA-DQB1/HLA-DRA/HLA-DRB1/HLA-DRB5/IFNGR1/IFNGR2/IL1B/IL10/IRAK1/MYD88/NCF2/NCF4/PTGS2/TLR4/NCF1                                                                                                                                                                 | 25    |
| MAFB        | 1.55387292  | 0         | CD8.T_CST3_AIF1   | Antigen processing and presentation | 1.71E-08 | CD4/CD74/CTSB/CTSL/CTSS/HLA-DMA/HLA-DMB/HLA-DOA/HLA-DPA1/HLA-DPB1/HLA-DQA1/HLA-DQB1/HLA-DRA/HLA-DRB1/HLA-DRB5/HSPA1A/HSPA1B/HSPA6/LGMN/IFI30                                                                                                                                                                                               | 20    |
| SPI1        | 1.498795641 | 0         | CD8.T_CST3_AIF1   | Toxoplasmosis                       | 2.93E-08 | AKT1/GNAI2/HLA-DMA/HLA-DMB/HLA-DOA/HLA-DPA1/HLA-DPB1/HLA-DQA1/HLA-DQB1/HLA-DRA/HLA-DRB1/HLA-DRB5/HSPA1A/HSPA1B/HSPA6/IFNGR1/IFNGR2/IL10/IL10RB/IRAK1/MYD88/TLR4/PIPF/LY96                                                                                                                                                                  | 24    |
| STAB1       | 1.393810977 | 0         | CD8.T_CST3_AIF1   | Salmonella infection                | 6.31E-08 | ACTB/AKT1/ANXA2/RHOA/RHOB/CD14/DYNC1H1/FOS/GAPDH/IL1B/CXCL8/IL18/IRAK1/M6PR/MYD88/PAK1/RAB5C/RAC1/TLR4/TUBA1A/RAB7A/ARPC5/ARPC3/ARPC1B/ACTR2/TUBA1B/TUBB4B/CYFIP1/LY96/CYTH4/PYCARD/SNX9/ARL8B/TUBB6/TUBA1C/NLRP3/TUBB/RAB7B                                                                                                               | 38    |
| BIRC5       | 1.343365266 | 0         | CD8.T_CST3_AIF1   | Asthma                              | 8.84E-08 | FCER1G/HLA-DMA/HLA-DMB/HLA-DOA/HLA-DPA1/HLA-DPB1/HLA-DQA1/HLA-DQB1/HLA-DRA/HLA-DRB1/HLA-DRB5/IL10                                                                                                                                                                                                                                          | 12    |
| MS4A4A      | 1.243460456 | 0         | CD8.T_CST3_AIF1   | Inflammatory bowel disease          | 1.50E-07 | HLA-DMA/HLA-DMB/HLA-DOA/HLA-DPA1/HLA-DPB1/HLA-DQA1/HLA-DQB1/HLA-DRA/HLA-DRB1/HLA-DRB5/IFNGR1/IFNGR2/IL1B/IL10/IL18/MAF/TLR4                                                                                                                                                                                                                | 17    |
| CYBB        | 1.179868011 | 0         | CD8.T_CST3_AIF1   | Pertussis                           | 3.30E-07 | RHOA/C1QA/C1QB/C1QC/CALM2/CALM3/CD14/FOS/GNAI2/IL1B/CXCL8/IL10/IRAK1/MYD88/TLR4/LY96/PYCARD/NLRP3                                                                                                                                                                                                                                          | 18    |
| KCTD12      | 1.120502887 | 0         | CD8.T_CST3_AIF1   | Lipid and atherosclerosis           | 4.18E-07 | ABCA1/AKT1/RHOA/ATF4/CALM2/CALM3/CD14/CYBB/FOS/CXCL1/CXCL2/CXCL3/HSPA1A/HSPA1B/HSPA6/IL1B/CXCL8/IL18/IRAK1/LYN/MYD88/NCF2/NCF4/RAC1/CCL2/CCL3/CCL3L1/SOD2/TLR4/LY96/PYCARD/NLRP3/NCF1                                                                                                                                                      | 33    |
| RNASE6      | 1.103078674 | 0         | CD8.T_CST3_AIF1   | Osteoclast differentiation          | 4.20E-07 | AKT1/CSF1R/FCGR1A/FCGR2A/FOS/FOSB/GRB2/IFNGR1/IFNGR2/IL1B/MITF/NCF2/NCF4/RAC1/SPI1/STAT2/SYK/TYROBP/LILRB2/LILRB5/LILRB4/TREM2/SIRPA/NCF1                                                                                                                                                                                                  | 24    |

|         |             |   |                 |                                              |          |                                                                                                                                                                                                                             |    |
|---------|-------------|---|-----------------|----------------------------------------------|----------|-----------------------------------------------------------------------------------------------------------------------------------------------------------------------------------------------------------------------------|----|
| ADAP2   | 1.086025056 | 0 | CD8.T_CST3_AIF1 | Pathogenic Escherichia coli infection        | 5.41E-07 | ACTB/RHOA/FCGR2A/FOS/GAPDH/IL1B/CXCL8/IL18/IRAK1/MYD88/MYO5A/PAK1/RAC1/TLR4/TUBA1A/ARPC5/ARPC3/ARPC1B/ACTR2/WASF2/TUBA1B/TUBB4B/BAIAP2/GNA13/CYFIP1/CYTH4/PYCARD/TUBB6/TUBA1C/NLRP3/TUBB                                    | 31 |
| PHACTR1 | 1.060218949 | 0 | CD8.T_CST3_AIF1 | Staphylococcus aureus infection              | 6.83E-07 | C1QA/C1QB/C1QC/C3AR1/C5AR1/CFD/FCGR1A/FCGR2A/FPR3/HLA-DMA/HLA-DMB/HLA-DOA/HLA-DPA1/HLA-DPB1/HLA-DQA1/HLA-DQB1/HLA-DRA/HLA-DRB1/HLA-DRB5/IL10                                                                                | 20 |
| TGFBI   | 1.054810193 | 0 | CD8.T_CST3_AIF1 | Allograft rejection                          | 1.15E-06 | CD86/HLA-DMA/HLA-DMB/HLA-DOA/HLA-DPA1/HLA-DPB1/HLA-DQA1/HLA-DQB1/HLA-DRA/HLA-DRB1/HLA-DRB5/IL10                                                                                                                             | 12 |
| MRC1    | 1.052423617 | 0 | CD8.T_CST3_AIF1 | Cell cycle                                   | 1.20E-06 | BUB1/BUB1B/CCNA2/CCNB1/CDK1/CDC20/CDC25B/CDKN2C/MAD2L1/MCM5/MCM7/PCNA/PLK1/RAD21/RB1/TFDP1/YWHAE/YWHAH/PKMYT1/CCNB2/PTTG1/ORC6/ANAPC11                                                                                      | 23 |
| MEF2C   | 1.04082122  | 0 | CD8.T_CST3_AIF1 | Yersinia infection                           | 1.52E-06 | ACTB/AKT1/RHOA/CD4/FCGR2A/FOS/GNAQ/IL1B/CXCL8/IL10/IL18/IRAK1/MYD88/RAC1/CCL2/TLR4/ARPC5/ARPC3/ARPC1B/ACTR2/WASF2/BAIAP2/PYCARD/NLRP3                                                                                       | 24 |
| MPEG1   | 0.989826549 | 0 | CD8.T_CST3_AIF1 | Chagas disease                               | 1.88E-06 | AKT1/C1QA/C1QB/C1QC/FOS/GNA15/GNAI2/GNAQ/GNAS/IFNGR1/IFNGR2/IL1B/CXCL8/IL10/IRAK1/MYD88/CCL2/CCL3/CCL3L1/TLR4                                                                                                               | 20 |
| RAB32   | 0.972513862 | 0 | CD8.T_CST3_AIF1 | Ferroptosis                                  | 2.85E-06 | CYBB/ACSL1/FTH1/FTL/GPX4/HMOX1/SLC11A2/PCBP1/PCBP2/SAT1/NCOA4/SLC40A1                                                                                                                                                       | 12 |
| RAB31   | 0.966029829 | 0 | CD8.T_CST3_AIF1 | Chemokine signaling pathway                  | 2.97E-06 | GRK3/AKT1/RHOA/ARRB2/CCR1/GNAI2/GNAQ/GNB1/GNB2/GNG5/GNG10/GRB2/CXCL1/CXCL2/CXCL3/HCK/CXCL8/LYN/PAK1/PRKACA/RAC1/CCL2/CCL3/CCL3L1/CCL8/STAT2/CXCL16/GNB4/NCF1                                                                | 29 |
| CD163   | 0.909507272 | 0 | CD8.T_CST3_AIF1 | Intestinal immune network for IgA production | 3.73E-06 | CD86/HLA-DMA/HLA-DMB/HLA-DOA/HLA-DPA1/HLA-DPB1/HLA-DQA1/HLA-DQB1/HLA-DRA/HLA-DRB1/HLA-DRB5/IL10/TNFSF13                                                                                                                     | 13 |
| IFNGR2  | 0.793389271 | 0 | CD8.T_CST3_AIF1 | Graft-versus-host disease                    | 3.78E-06 | CD86/HLA-DMA/HLA-DMB/HLA-DOA/HLA-DPA1/HLA-DPB1/HLA-DQA1/HLA-DQB1/HLA-DRA/HLA-DRB1/HLA-DRB5/IL1B                                                                                                                             | 12 |
| CSF1R   | 0.753751601 | 0 | CD8.T_CST3_AIF1 | Hematopoietic cell lineage                   | 4.74E-06 | CD4/CD9/CD14/CD33/CD59/CSF1R/FCGR1A/HLA-DMA/HLA-DMB/HLA-DOA/HLA-DPA1/HLA-DPB1/HLA-DQA1/HLA-DQB1/HLA-DRA/HLA-DRB1/HLA-DRB5/IL1B/IL6R                                                                                         | 19 |
| LY86    | 0.708398003 | 0 | CD8.T_CST3_AIF1 | Type I diabetes mellitus                     | 4.97E-06 | CD86/HLA-DMA/HLA-DMB/HLA-DOA/HLA-DPA1/HLA-DPB1/HLA-DQA1/HLA-DQB1/HLA-DRA/HLA-DRB1/HLA-DRB5/IL1B                                                                                                                             | 12 |
| LYVE1   | 0.655488329 | 0 | CD8.T_CST3_AIF1 | Prion disease                                | 5.07E-06 | ATF4/ATP5F1E/ATP5PB/ATP5PF/ATP5PO/C1QA/C1QB/C1QC/COX5B/COX6B1/COX8A/CYBB/EGR1/HSPA1A/HSPA1B/HSPA6/IL1B/NCF2/NCF4/NDUFB1/NDUFC1/PRKACA/RAC1/TUBA1A/COX5A/PIF/TUBA1B/TUBB4B/ATP5PD/UQCR11/UQCRQ/UQCR10/TUBB6/TUBA1C/TUBB/NCF1 | 36 |
| CLEC7A  | 0.604947708 | 0 | CD8.T_CST3_AIF1 | Human T-cell leukemia virus 1 infection      | 7.23E-06 | AKT1/ATF4/BUB1B/CCNA2/CD4/CDC20/CDKN2C/EGR1/ETS2/FOS/HLA-DMA/HLA-DMB/HLA-DOA/HLA-DPA1/HLA-DPB1/HLA-DQA1/HLA-DQB1/HLA-DRA/HLA-DRB1/HLA-DRB5/MAD2L1/MAP3K3/PRKACA/PDEN/RB1/SPI1/XPO1/NRP1/CCNB2/PTTG1/ANAPC11                 | 31 |
| TMEM37  | 0.551690126 | 0 | CD8.T_CST3_AIF1 | Amoebiasis                                   | 7.49E-06 | ACTN1/CD14/GNA15/GNAQ/GNAS/CXCL1/CXCL2/CXCL3/HSPB1/IL1B/CXCL8/IL10/PRDX1/SERPINB6/PRKACA/RAB5C/TLR4/RAB7A/RAB7B                                                                                                             | 19 |
| CD86    | 0.533816907 | 0 | CD8.T_CST3_AIF1 | Viral myocarditis                            | 8.18E-06 | ABL2/ACTB/CD86/HLA-DMA/HLA-DMB/HLA-DOA/HLA-DPA1/HLA-DPB1/HLA-DQA1/HLA-DQB1/HLA-DRA/HLA-DRB1/HLA-DRB5/RAC1                                                                                                                   | 14 |
| TUBB6   | 0.475104021 | 0 | CD8.T_CST3_AIF1 | Influenza A                                  | 8.58E-06 | ACTB/AKT1/HLA-DMA/HLA-DMB/HLA-DOA/HLA-DPA1/HLA-DPB1/HLA-DQA1/HLA-DQB1/HLA-DRA/HLA-DRB1/HLA-DRB5/IFNGR1/IFNGR2/IL1B/CXCL8/IL18/KPNA2/MYD88/CCL2/STAT2/TLR4/XPO1/HNRNPUL1/PYCARD/NLRP3                                        | 26 |
| 1-Mar   | 0.454110082 | 0 | CD8.T_CST3_AIF1 | Endocytosis                                  | 1.35E-05 | GRK3/AP2A2/RHOA/ARRB2/CAPZA2/CAPZB/AP2S1/CLTA/CLTC/DAB2/FOLR2/HSPA1A/HSPA1B/HSPA6/RAB5C/SNX2/RAB7A/SNX3/ARPC5/ARPC3/ARPC1B/ACTR2/RAB31/WWP1/WASHC4/CYTH4/SNX5/EPN1/ASAP1/SPG21/VPS29/VPS35/ARAP1                            | 33 |

|         |             |           |                 |                                                            |             |                                                                                                                                                                                            |    |
|---------|-------------|-----------|-----------------|------------------------------------------------------------|-------------|--------------------------------------------------------------------------------------------------------------------------------------------------------------------------------------------|----|
| IQGAP3  | 0.361027615 | 0         | CD8.T_CST3_AIF1 | Chemical carcinogenesis - reactive oxygen species          | 2.14E-05    | ABL2/AKT1/ATP5F1E/ATP5PB/ATP5PF/ATP5PO/COX5B/COX6B1/COX8A/FOS/GRB2/HMOX1/MGST2/MGST3/NCF2/NDUFB1/NDUFC1/PTEN/RAC1/SOD2/VEGFA/COX5A/GSTO1/PPIF/AKR1A1/ATP5PD/UQCR11/UQCRQ/UQCR10/NCF1       | 30 |
| HOMER3  | 0.593921533 | 7.46E-299 | CD8.T_CST3_AIF1 | Legionellosis                                              | 2.24E-05    | CD14/CXCL1/CXCL2/CXCL3/HSPA1A/HSPA1B/HSPA6/IL1B/CXCL8/IL18/MYD88/TLR4/PYCARD                                                                                                               | 13 |
| ITSN1   | 0.642707152 | 1.47E-298 | CD8.T_CST3_AIF1 | Human cytomegalovirus infection                            | 2.54E-05    | AKT1/RHOA/ATF4/CALM2/CALM3/CCR1/EIF4EBP1/GNAI2/GNAQ/GNAS/GNB1/GNB2/GNG5/GNG10/GRB2/IL1B/IL6R/CXCL8/IL10RB/PRKACA/PTGS2/RAC1/RB1/RHEB/CCL2/CCL3/CCL3L1/VEGFA/GNA13/GNB4                     | 30 |
| MARCKS  | 2.45137307  | 2.47E-296 | CD8.T_CST3_AIF1 | Oxidative phosphorylation                                  | 3.98E-05    | ATP5F1E/ATP5PB/ATP5PF/ATP6V1B2/ATP6V0C/ATP6V0B/ATP6V0A1/ATP5PO/COX5B/COX6B1/COX8A/NDUFB1/NDUFC1/ATP6V0D1/ATP6V1F/COX5A/ATP5MF/ATP5PD/UQCR11/UQCRQ/UQCR10                                   | 21 |
| CD68    | 1.724729651 | 1.02E-294 | CD8.T_CST3_AIF1 | Autoimmune thyroid disease                                 | 5.00E-05    | CD86/HLA-DMA/HLA-DMB/HLA-DOA/HLA-DPA1/HLA-DPB1/HLA-DQA1/HLA-DQB1/HLA-DRA/HLA-DRB1/HLA-DRB5/IL10                                                                                            | 12 |
| COLEC12 | 0.427966535 | 2.17E-294 | CD8.T_CST3_AIF1 | Fc gamma R-mediated phagocytosis                           | 5.11E-05    | AKT1/FCGR1A/FCGR2A/GSN/HCK/LYN/MARCKS/PAK1/RAC1/SYK/ARPC5/ARPC3/ARPC1B/ACTR2/WASF2/ASAP1/NCF1                                                                                              | 17 |
| MS4A7   | 1.720777812 | 1.28E-292 | CD8.T_CST3_AIF1 | Epithelial cell signaling in Helicobacter pylori infection | 5.25E-05    | ATP6V1B2/ATP6V0C/ATP6V0B/ATP6V0A1/HBEGF/CXCL1/CXCL2/CXCL3/CXCL8/LYN/PAK1/RAC1/ATP6V0D1/ATP6V1F                                                                                             | 14 |
| AIF1    | 3.102687613 | 2.15E-291 | CD8.T_CST3_AIF1 | Kaposi sarcoma-associated herpesvirus infection            | 8.06E-05    | AKT1/CALM2/CALM3/CD86/CCR1/RCAN1/FOS/GNB1/GNB2/GNG5/GNG10/CXCL1/CXCL2/CXCL3/HCK/IFNGR1/CXCL8/LYN/PTGS2/RAC1/RB1/STAT2/SYK/VEGFA/GNB4/ATG3                                                  | 26 |
| DEPDC1  | 0.541245771 | 2.45E-291 | CD8.T_CST3_AIF1 | Th1 and Th2 cell differentiation                           | 9.32E-05    | CD4/FOS/HLA-DMA/HLA-DMB/HLA-DOA/HLA-DPA1/HLA-DPB1/HLA-DQA1/HLA-DQB1/HLA-DRA/HLA-DRB1/HLA-DRB5/IFNGR1/IFNGR2/RBPJ/MAF                                                                       | 16 |
| C1orf54 | 0.817950001 | 1.20E-289 | CD8.T_CST3_AIF1 | Diabetic cardiomyopathy                                    | 0.000171583 | AKT1/ATP5F1E/ATP5PB/ATP5PF/ATP5PO/COX5B/COX6B1/COX8A/CTSD/CYBB/GAPDH/NCF2/NCF4/NDUFB1/NDUFC1/PDK4/PTPA/PTEN/RAC1/COX5A/PPIF/ATP5PD/UQCR11/UQCRQ/UQCR10/NCF1                                | 26 |
| GTSE1   | 1.058344579 | 1.57E-282 | CD8.T_CST3_AIF1 | Th17 cell differentiation                                  | 0.000202527 | RUNX1/CD4/FOS/HLA-DMA/HLA-DMB/HLA-DOA/HLA-DPA1/HLA-DPB1/HLA-DQA1/HLA-DQB1/HLA-DRA/HLA-DRB1/HLA-DRB5/IFNGR1/IFNGR2/IL1B/IL6R                                                                | 17 |
| TIMP2   | 1.256686137 | 1.35E-279 | CD8.T_CST3_AIF1 | Fluid shear stress and atherosclerosis                     | 0.000203084 | ACTB/AKT1/RHOA/CALM2/CALM3/CTSL/FOS/HMOX1/IL1B/MEF2C/MGST2/MGST3/NCF2/RAC1/CCL2/SUMO3/THBD/VEGFA/GSTO1/NCF1                                                                                | 20 |
| MKI67   | 1.576455227 | 1.71E-279 | CD8.T_CST3_AIF1 | Progesterone-mediated oocyte maturation                    | 0.00032247  | AKT1/BUB1/CCNA2/CCNB1/CDK1/CDC25B/GNAI2/KIF22/MAD2L1/PLK1/PRKACA/AURKA/PKMYT1/CCNB2/ANAPC11/CPEB4                                                                                          | 16 |
| PRR11   | 0.619682491 | 4.98E-278 | CD8.T_CST3_AIF1 | Systemic lupus erythematosus                               | 0.000426767 | ACTN1/C1QA/C1QB/C1QC/CD86/FCGR1A/FCGR2A/HLA-DMA/HLA-DMB/HLA-DOA/HLA-DPA1/HLA-DPB1/HLA-DQA1/HLA-DQB1/HLA-DRA/HLA-DRB1/HLA-DRB5/IL10/SNRPD1                                                  | 19 |
| SLC15A3 | 0.607033432 | 1.23E-270 | CD8.T_CST3_AIF1 | Complement and coagulation cascades                        | 0.000452876 | A2M/C1QA/C1QB/C1QC/C3AR1/C5AR1/CD59/CFD/F13A1/ITGAX/PLAU/PLAUR/THBD/VSIG4                                                                                                                  | 14 |
| GPR34   | 0.62273846  | 2.04E-270 | CD8.T_CST3_AIF1 | Oocyte meiosis                                             | 0.000733951 | BUB1/CALM2/CALM3/CCNB1/CDK1/CDC20/MAD2L1/PLK1/PRKACA/AURKA/YWHAH/YWHAH/PKMYT1/CCNB2/PTTG1/ANAPC11/CPFB4/SGO1                                                                               | 18 |
| SPRED1  | 0.655250312 | 2.64E-265 | CD8.T_CST3_AIF1 | Parkinson disease                                          | 0.001132431 | ATF4/ATP5F1E/ATP5PB/ATP5PF/ATP5PO/CALM2/CALM3/COX5B/COX6B1/COX8A/GNAI2/GNAS/NDUFB1/NDUFC1/SLC11A2/PRKACA/SNCA/TUBA1A/COX5A/PPIF/TUBA1B/TUBB4B/ATP5PD/UQCR11/UQCRQ/UQCR10/TUBB6/TUBA1C/TUBB | 29 |
| CCNB2   | 0.808960225 | 6.32E-265 | CD8.T_CST3_AIF1 | C-type lectin receptor signaling pathway                   | 0.001207569 | AKT1/RHOA/CALM2/CALM3/FCER1G/IL1B/IL10/PAK1/PTGS2/STAT2/SYK/PYCARD/CD209/CLECT7A/NLRP3                                                                                                     | 15 |
| HCK     | 0.599317105 | 4.41E-262 | CD8.T_CST3_AIF1 | Coronavirus disease - COVID-19                             | 0.001354297 | C1QA/C1QB/C1QC/C3AR1/C5AR1/CYBB/CFD/HBEGF/F13A1/FCGR2A/FOS/IL1B/IL6R/CXCL8/IRAK1/MYD88/RPLP0/RPS17/RPS20/CCL2/STAT2/SYK/TLR4/NRP1/RPL26L1/NLRP3                                            | 26 |
| SASH1   | 0.471049344 | 8.70E-261 | CD8.T_CST3_AIF1 | Autophagy - animal                                         | 0.001737797 | AKT1/CTSB/CTSD/CTSL/DAPK1/HMGB1/LAMP2/PRKACA/PTEN/RHEB/RAB7A/VAMP8/GABARAP/WIP1/RRAGC/MTMR14/ATG3/RAB7B                                                                                    | 18 |

|         |             |           |                 |                                                               |             |                                                                                                                                                                                                                                                                                            |    |
|---------|-------------|-----------|-----------------|---------------------------------------------------------------|-------------|--------------------------------------------------------------------------------------------------------------------------------------------------------------------------------------------------------------------------------------------------------------------------------------------|----|
| CPM     | 0.460236526 | 1.65E-259 | CD8.T_CST3_AIF1 | Human immunodeficiency virus 1 infection                      | 0.001784956 | AP1B1/AKT1/CALM2/CALM3/CCNB1/CD4/CDK1/FOS/GNAI2/GNAQ/GNB1/GNB2/GNG5/GNG10/IRAK1/MYD88/PAK1/RAC1/TLR4/AP1S2/AP1M1/CCNB2/SAMHD1/GNB4                                                                                                                                                         | 24 |
| C1QC    | 2.791931651 | 2.30E-258 | CD8.T_CST3_AIF1 | Bacterial invasion of epithelial cells                        | 0.001866994 | ACTB/RHOA/CLTA/CLTC/CTNNA1/RAC1/ARPC5/ARPC3/ARPC1B/ACTR2/WASF2/SEPTIN11                                                                                                                                                                                                                    | 12 |
| IGSF21  | 0.602243606 | 3.38E-257 | CD8.T_CST3_AIF1 | Viral protein interaction with cytokine and cytokine receptor | 0.002319157 | CCR1/CSF1R/CXCL1/CXCL2/CXCL3/IL6R/CXCL8/IL10/IL10RB/IL18/CCL2/CCL3/CCL3L1/CCL8                                                                                                                                                                                                             | 14 |
| LGMN    | 1.54200798  | 5.56E-255 | CD8.T_CST3_AIF1 | Alzheimer disease                                             | 0.002448057 | AKT1/APOE/ATF4/ATP5F1E/ATP5PB/ATP5PF/ATP5PO/CALM2/CALM3/COX5B/COX6B1/COX8A/CYBB/GAPDH/GNAQ/IL1B/LRP1/NDUFB1/NDUFC1/SLC11A2/PTGS2/SNCA/TUBA1A/COX5A/PPIF/TUBA1B/TUBB4B/ATP5PD/UQCRC11/WIPI2/UQCRCR/UQCRCR10/APH1A/RTN4/TUBB6/TUBA1C/TUBB                                                    | 37 |
| PLAU    | 0.880356444 | 1.73E-252 | CD8.T_CST3_AIF1 | Cholesterol metabolism                                        | 0.002481137 | ABCA1/APOA2/APOC1/APOE/SCARB1/LIPA/LRP1/PLTP/NPC2                                                                                                                                                                                                                                          | 9  |
| VSIG4   | 0.740230806 | 3.05E-252 | CD8.T_CST3_AIF1 | Vibrio cholerae infection                                     | 0.002481137 | ACTB/ATP6V1B2/ATP6V0C/ATP6V0B/ATP6V0A1/GNAS/PRKACA/ATP6V0D1/ATP6V1F                                                                                                                                                                                                                        | 9  |
| RAB20   | 0.621487508 | 4.67E-249 | CD8.T_CST3_AIF1 | Malaria                                                       | 0.002481137 | GYPC/IL1B/CXCL8/IL10/IL18/LRP1/MYD88/CCL2/TLR4                                                                                                                                                                                                                                             | 9  |
| SDC3    | 0.607868567 | 1.21E-248 | CD8.T_CST3_AIF1 | Other glycan degradation                                      | 0.003313008 | FUCA2/GBA/HEXA/HEXB/MAN2B1                                                                                                                                                                                                                                                                 | 5  |
| GASK1B  | 0.41530378  | 2.56E-245 | CD8.T_CST3_AIF1 | NF-kappa B signaling pathway                                  | 0.003356007 | CD14/CXCL1/CXCL2/CXCL3/IL1B/CXCL8/IRAK1/LYN/MYD88/PLAU/PTGS2/SYK/TLR4/LY96                                                                                                                                                                                                                 | 14 |
| NRP2    | 0.74784399  | 1.69E-243 | CD8.T_CST3_AIF1 | Toll-like receptor signaling pathway                          | 0.003356007 | AKT1/CD14/CD86/FOS/IL1B/CXCL8/IRAK1/MYD88/RAC1/CCL3/CCL3L1/SPP1/TLR4/LY96                                                                                                                                                                                                                  | 14 |
| RBM47   | 0.527272167 | 9.43E-243 | CD8.T_CST3_AIF1 | Endocrine and other factor-regulated calcium reabsorption     | 0.003744964 | AP2A2/ATP1B1/AP2S1/CLTA/CLTC/CLTB/CLTD/CLTE/CLTF/CLTG/CLTH/CLTI/CLTJ/CLTK/CLTL/CLTM/CLTN/CLTO/CLTP/CLTQ/CLTR/CLTS/CLTV/CLTW/CLTX/CLTY/CLTZ/CLTA1/CLTB1/CLTC1/CLTD1/CLTE1/CLTF1/CLTG1/CLTH1/CLTI1/CLTJ1/CLTK1/CLTL1/CLTM1/CLTN1/CLTO1/CLTP1/CLTQ1/CLTR1/CLTS1/CLTV1/CLTW1/CLTX1/CLTY1/CLTZ1 | 9  |
| SLC40A1 | 1.816173328 | 7.90E-242 | CD8.T_CST3_AIF1 | Parathyroid hormone synthesis, secretion and action           | 0.004001395 | RHOA/ARRB2/ATF4/HBEGF/EGR1/FOS/GNAI2/GNAQ/GNAS/MEF2C/MMP14/PRKACA/MAFB/GNA13                                                                                                                                                                                                               | 14 |
| MSR1    | 0.685644148 | 1.61E-241 | CD8.T_CST3_AIF1 | Relaxin signaling pathway                                     | 0.00410384  | AKT1/ARRB2/ATF4/FOS/GNA15/GNAI2/GNAS/GNB1/GNB2/GNG5/GNG10/GRB2/PRKACA/VEGFA/VEGFB/GNB4                                                                                                                                                                                                     | 16 |
| CENPF   | 1.596312523 | 3.85E-240 | CD8.T_CST3_AIF1 | Epstein-Barr virus infection                                  | 0.004384798 | AKT1/CCNA2/HLA-DMA/HLA-DMB/HLA-DOA/HLA-DPA1/HLA-DPB1/HLA-DQA1/HLA-DQB1/HLA-DRA/HLA-DRB1/HLA-DRB5/HES1/RBPJ/IRAK1/LYN/MYD88/RAC1/RB1/STAT2/SYK/VIM                                                                                                                                          | 22 |
| FOLR2   | 1.251843209 | 6.85E-240 | CD8.T_CST3_AIF1 | Collecting duct acid secretion                                | 0.004414049 | ATP6V1B2/ATP6V0C/ATP6V0A1/ATP6V0D1/ATP6V1F/SLC12A7                                                                                                                                                                                                                                         | 6  |
| NRP1    | 0.582622485 | 7.81E-240 | CD8.T_CST3_AIF1 | Alcoholic liver disease                                       | 0.004536643 | AKT1/C1QA/C1QB/C1QC/C3AR1/C5AR1/CD14/CXCL1/CXCL2/CXCL3/IL1B/CXCL8/IRAK1/MYD88/TLR4/LY96/ADIPOR1                                                                                                                                                                                            | 17 |
| CTSL    | 1.195551769 | 2.42E-239 | CD8.T_CST3_AIF1 | Non-alcoholic fatty liver disease                             | 0.004909989 | AKT1/ATF4/COX5B/COX6B1/COX8A/FOS/IL1B/IL6R/CXCL8/MAP3K11/NDUFB1/NDUFC1/RAC1/COX5A/UQCRC11/UQCRCR/UQCRCR10/ADIPOR1                                                                                                                                                                          | 18 |
| VMO1    | 0.587518206 | 2.61E-239 | CD8.T_CST3_AIF1 | Transcriptional misregulation in cancer                       | 0.005058053 | RUNX1/CCNA2/CD14/CD86/CDKN2C/CEBPB/CSF1R/ETV5/ETV6/FCGR1A/CXCL8/LMO2/LYL1/MAF/MEF2C/MITF/PLAU/SPI1/NSD2/NR4A3/BMP2K                                                                                                                                                                        | 21 |
| SLC8A1  | 0.278004967 | 5.04E-237 | CD8.T_CST3_AIF1 | African trypanosomiasis                                       | 0.005550515 | GNAQ/IL1B/IL10/IL18/IDO1/MYD88/THOP1                                                                                                                                                                                                                                                       | 7  |
| CD14    | 1.63317442  | 1.45E-232 | CD8.T_CST3_AIF1 | Tight junction                                                | 0.005571745 | ACTB/ACTN1/RHOA/RUNX1/MYL6/PCNA/PRKACA/RAB13/RAC1/RDX/TUBA1A/YBX3/ARPC5/ARPC3/ARPC1B/ACTR2/TUBA1B/ARHGAP17/TUBA1C                                                                                                                                                                          | 19 |
| BCAT1   | 0.443733238 | 2.91E-232 | CD8.T_CST3_AIF1 | Gap junction                                                  | 0.005763235 | CDK1/GNAI2/GNAQ/GNAS/GRB2/PRKACA/TUBA1A/TUBA1B/TUBB4B/TUBB6/TUBA1C/TUBB                                                                                                                                                                                                                    | 12 |
| LILRB2  | 0.520062193 | 7.45E-230 | CD8.T_CST3_AIF1 | Synaptic vesicle cycle                                        | 0.006246528 | AP2A2/ATP6V1B2/ATP6V0C/ATP6V0B/ATP6V0A1/AP2S1/CLTA/CLTC/SLC1A3/ATP6V0D1/ATP6V1F                                                                                                                                                                                                            | 11 |
| PID1    | 0.434412603 | 1.00E-228 | CD8.T_CST3_AIF1 | Glutathione metabolism                                        | 0.006914052 | GPX4/IDH2/MGST2/MGST3/PGD/RRM2/GSTO1/HPGDS/LAP3                                                                                                                                                                                                                                            | 9  |
| FCGR2A  | 1.290163817 | 2.25E-224 | CD8.T_CST3_AIF1 | Amino sugar and nucleotide sugar metabolism                   | 0.007837067 | CYB5R3/HEXA/HEXB/GNPD1/NANS/NAGK/NPL/UAP1L1                                                                                                                                                                                                                                                | 8  |
| F13A1   | 0.471747614 | 2.92E-220 | CD8.T_CST3_AIF1 | Apelin signaling pathway                                      | 0.00843377  | AKT1/CALM2/CALM3/EGR1/GNAI2/GNAQ/GNB1/GNB2/GNG5/GNG10/MEF2C/PRKACA/SLC8A1/SPP1/GNA13/GNB4                                                                                                                                                                                                  | 16 |
| HMMR    | 1.010580399 | 3.40E-216 | CD8.T_CST3_AIF1 | Mineral absorption                                            | 0.008640495 | ATOX1/ATP1B1/FTH1/FTL/HMOX1/MT1G/SLC11A2/SLC8A1/SLC40A1                                                                                                                                                                                                                                    | 9  |
| CXCL16  | 1.033100853 | 1.46E-215 | CD8.T_CST3_AIF1 | Huntington disease                                            | 0.008700313 | AP2A2/ATP5F1E/ATP5PB/ATP5PF/ATP5PO/AP2S1/CLTA/CLTC/COX5B/COX6B1/COX8A/GNAQ/NDUFB1/NDUFC1/SLC1A3/SOD2/TUBA1A/COX5A/PPIF/TUBA1B/TUBB4B/ATP5PD/UQCRC11/WIPI2/UQCRCR/UQCRCR10/TUBB6/TUBA1C/TUBB                                                                                                | 29 |
| HNMT    | 0.657505262 | 7.09E-213 | CD8.T_CST3_AIF1 | Glycosphingolipid biosynthesis - globo and isoglobo series    | 0.010078027 | GLA/HEXA/HEXB/NAGA                                                                                                                                                                                                                                                                         | 4  |

|         |             |           |                 |                                                        |             |                                                                                                                                                                 |    |
|---------|-------------|-----------|-----------------|--------------------------------------------------------|-------------|-----------------------------------------------------------------------------------------------------------------------------------------------------------------|----|
| DAB2    | 2.030973824 | 9.47E-213 | CD8.T_CST3_AIF1 | Dopaminergic synapse                                   | 0.011824356 | AKT1/ARRB2/ATF4/CALM2/CALM3/FOS/GNAI2/GNAQ/GNAS/GNB1/GNB2/GNG5/GNG10/PRKACA/GNB4                                                                                | 15 |
| GRN     | 1.906488788 | 1.05E-212 | CD8.T_CST3_AIF1 | Circadian entrainment                                  | 0.012340071 | CALM2/CALM3/FOS/GNAI2/GNAQ/GNAS/GNB1/GNB2/GNG5/GNG10/PRKACA/GNB4                                                                                                | 12 |
| GNB4    | 0.47706018  | 1.34E-212 | CD8.T_CST3_AIF1 | HIF-1 signaling pathway                                | 0.012623252 | AKT1/CYBB/EIF4EBP1/GAPDH/HMOX1/IFNGR1/IFNGR2/IL6R/FPKLT/IMP1/TLR4/VEGFA/MKNK1                                                                                   | 13 |
| EPB41L3 | 0.338189354 | 3.15E-210 | CD8.T_CST3_AIF1 | NOD-like receptor signaling pathway                    | 0.013422604 | RHOA/CTSB/CYBB/CXCL1/CXCL2/CXCL3/IL1B/CXCL8/IL18/MYD88/P2RX7/ICL2/STAT2/TLR4/YWHAE/INAMPT/GABARAP/PYCARD/NLRP3                                                  | 19 |
| ANLN    | 0.593343203 | 9.50E-210 | CD8.T_CST3_AIF1 | Apoptosis                                              | 0.015274492 | ACTB/AKT1/BIRC5/ATF4/CTSB/CTSD/CTSH/CTSL/CTSS/CTSZFOS/LMNB1/TUBA1A/TUBA1B/TUBA1C                                                                                | 15 |
| TLR4    | 0.458424533 | 4.12E-208 | CD8.T_CST3_AIF1 | Platelet activation                                    | 0.015521187 | ACTB/AKT1/RHOA/FCER1G/FCGR2A/GNAI2/GNAQ/GNAS/LYN/PRKACA/SYK/TBXAS1/VAMP8/GNA13                                                                                  | 14 |
| JDP2    | 0.385598738 | 3.01E-206 | CD8.T_CST3_AIF1 | Cell adhesion molecules                                | 0.015821769 | CD4/CD86/HLA-DMA/HLA-DMB/HLA-DOA/HLA-DPA1/HLA-DPB1/HLA-DQA1/HLA-DQB1/HLA-DRA/HLA-DRB1/HLA-DRB5/NECTIN2/SIGLEC1/SDC3/CADM1                                       | 16 |
| LHFPL2  | 0.318844813 | 1.02E-203 | CD8.T_CST3_AIF1 | MAPK signaling pathway                                 | 0.016339368 | AKT1/ARRB2/ATF4/CD14/CDC25B/CSF1R/DUSP3/FOS/GRB2/NR4A1/HSPA1A/HSPA1B/HSPA6/HSPB1/IL1B/IRAK1/STMN1/MEF2C/MAP3K3/MAP3K11/MYD88/PAK1/PRKACA/RAC1/VEGFA/VEGFB/MKNK1 | 27 |
| CD302   | 0.704013469 | 5.09E-202 | CD8.T_CST3_AIF1 | Estrogen signaling pathway                             | 0.017267927 | AKT1/ATF4/CALM2/CALM3/CTSD/HBEGF/FOS/GNAI2/GNAQ/GNAS/GRB2/HSPA1A/HSPA1B/HSPA6/PRKACA                                                                            | 15 |
| ZFH3    | 0.629387311 | 2.28E-200 | CD8.T_CST3_AIF1 | Acute myeloid leukemia                                 | 0.017321247 | AKT1/RUNX1/CCNA2/CD14/CSF1R/EIF4EBP1/FCGR1A/GRB2/SPI1                                                                                                           | 9  |
| TPX2    | 0.943745836 | 1.67E-198 | CD8.T_CST3_AIF1 | Glutamatergic synapse                                  | 0.017882416 | GRK3/GLUL/GNAI2/GNAQ/GNAS/GNB1/GNB2/GNG5/GNG10/PRKACA/SLC1A3/HOMER3/GNB4                                                                                        | 13 |
| BMP2K   | 0.749817159 | 1.04E-196 | CD8.T_CST3_AIF1 | Valine, leucine and isoleucine biosynthesis            | 0.019661381 | BCAT1/SDS                                                                                                                                                       | 2  |
| MMP14   | 0.277724805 | 8.90E-195 | CD8.T_CST3_AIF1 | Pyrimidine metabolism                                  | 0.020901818 | DCK/DTYMK/TYMP/NME4/RRM2/TK1/TYMS                                                                                                                               | 8  |
| DPYSL2  | 0.768596512 | 1.06E-193 | CD8.T_CST3_AIF1 | GnRH signaling pathway                                 | 0.022035731 | ATF4/CALM2/CALM3/HBEGF/EGR1/GNAQ/GNAS/GRB2/MAP3K3/MMP14/PRKACA                                                                                                  | 11 |
| IGSF6   | 1.181920422 | 1.52E-193 | CD8.T_CST3_AIF1 | B cell receptor signaling pathway                      | 0.023379764 | AKT1/FOS/GRB2/LYN/RAC1/SYK/LILRB2/LILRB5/LILRB4/DAPP1                                                                                                           | 10 |
| RIN2    | 0.267217635 | 7.57E-191 | CD8.T_CST3_AIF1 | IL-17 signaling pathway                                | 0.02366947  | CEBPB/FOS/FOSB/CXCL1/CXCL2/CXCL3/IL1B/CXCL8/PTGS2/S100A9/CCL2                                                                                                   | 11 |
| CDC20   | 0.915530001 | 5.04E-189 | CD8.T_CST3_AIF1 | Glycosaminoglycan degradation                          | 0.023693072 | GNS/GUSB/HEXA/HEXB                                                                                                                                              | 4  |
| RAB7B   | 0.425448742 | 8.81E-188 | CD8.T_CST3_AIF1 | Adherens junction                                      | 0.02449209  | ACTB/ACTN1/RHOA/CTNNA1/CTNND1/NECTIN2/RAC1/WASF2/BAIAP2                                                                                                         | 9  |
| CDK1    | 1.233512155 | 1.00E-186 | CD8.T_CST3_AIF1 | Antifolate resistance                                  | 0.030597804 | DHFR/FOLR2/IL1B/TYMS/GGH                                                                                                                                        | 5  |
| MITF    | 0.348733305 | 3.18E-185 | CD8.T_CST3_AIF1 | Bladder cancer                                         | 0.033226567 | DAPK1/HBEGF/TYMP/CXCL8/RB1/VEGFA                                                                                                                                | 6  |
| SHTN1   | 0.60689429  | 3.51E-185 | CD8.T_CST3_AIF1 | Cardiac muscle contraction                             | 0.033642493 | ATP1B1/COX5B/COX6B1/COX8A/SLC8A1/TPM3/COX5A/UQCR11/UQCRQ/UQCR10                                                                                                 | 10 |
| SIRPA   | 0.494904516 | 5.21E-183 | CD8.T_CST3_AIF1 | Thermogenesis                                          | 0.036351832 | ACTB/ATP5F1E/ATP5PB/ATP5PF/ATP5PO/COX5B/COX6B1/COX8A/ACSL1/GNAS/GRB2/NDUFB1/NDUFC1/PRKACA/RHEB/COX5A/ATP5MF/ATP5PD/UQCR11/UQCRQ/UQCR10                          | 21 |
| CCNA2   | 0.607247769 | 1.66E-182 | CD8.T_CST3_AIF1 | Shigellosis                                            | 0.038154603 | ACTB/ACTN1/AKT1/RHOA/CD14/IL1B/CXCL8/IL18/MYD88/RAC1/TLR4/ARPC5/ARPC3/ARPC1B/ACTR2/WASF2/WIPI2/CYTH4/PYCARD/SEPTIN1/RRAGC/NLRP3                                 | 22 |
| SIGLEC1 | 0.496855611 | 3.67E-180 | CD8.T_CST3_AIF1 | PD-L1 expression and PD-1 checkpoint pathway in cancer | 0.03851598  | AKT1/CD4/FOS/IFNGR1/IFNGR2/MAP3K3/MYD88/PDEN/TLR4/BATF3                                                                                                         | 10 |
| TTYH3   | 1.029447871 | 6.54E-180 | CD8.T_CST3_AIF1 | Morphine addiction                                     | 0.043856036 | GRK3/ARRB2/GNAI2/GNAS/GNB1/GNB2/GNG5/GNG10/PRKACA/GNB4                                                                                                          | 10 |
| KLF4    | 0.889613266 | 1.33E-177 | CD8.T_CST3_AIF1 | Cellular senescence                                    | 0.045205311 | AKT1/ZFP36L1/CALM2/CALM3/CCNA2/CCNB1/CDK1/EIF4EBP1/FOXM1/CXCL8/MYBL2/PDEN/RB1/RHEB/CCNB2                                                                        | 15 |
| CDCA3   | 0.639762591 | 2.68E-177 | CD8.T_CST3_AIF1 | Drug metabolism - other enzymes                        | 0.047844413 | TYMP/GUSB/MGST2/MGST3/NME2/NME4/RRM2/TK1/GSTO1                                                                                                                  | 9  |
| GRK3    | 0.375611311 | 5.17E-177 | CD8.T_CST3_AIF1 |                                                        |             |                                                                                                                                                                 |    |
| THBD    | 0.496855611 | 7.81E-176 | CD8.T_CST3_AIF1 |                                                        |             |                                                                                                                                                                 |    |
| FCGR1A  | 0.307803041 | 2.57E-175 | CD8.T_CST3_AIF1 |                                                        |             |                                                                                                                                                                 |    |
| C1QA    | 3.360126175 | 1.64E-173 | CD8.T_CST3_AIF1 |                                                        |             |                                                                                                                                                                 |    |
| SOGA1   | 0.286474317 | 4.35E-173 | CD8.T_CST3_AIF1 |                                                        |             |                                                                                                                                                                 |    |
| CDKN3   | 0.9571715   | 6.68E-172 | CD8.T_CST3_AIF1 |                                                        |             |                                                                                                                                                                 |    |
| CD209   | 0.403699117 | 7.11E-172 | CD8.T_CST3_AIF1 |                                                        |             |                                                                                                                                                                 |    |
| KCNMA1  | 0.423772652 | 1.23E-170 | CD8.T_CST3_AIF1 |                                                        |             |                                                                                                                                                                 |    |
| HBEGF   | 0.779977428 | 3.03E-170 | CD8.T_CST3_AIF1 |                                                        |             |                                                                                                                                                                 |    |

|            |             |           |                 |
|------------|-------------|-----------|-----------------|
| LMO2       | 0.508627525 | 4.62E-170 | CD8.T_CST3_AIF1 |
| ARPIN      | 0.2662374   | 7.91E-170 | CD8.T_CST3_AIF1 |
| RNASE1     | 3.196988577 | 1.02E-169 | CD8.T_CST3_AIF1 |
| CEP55      | 0.668938272 | 2.32E-169 | CD8.T_CST3_AIF1 |
| PLK1       | 0.605412817 | 4.16E-169 | CD8.T_CST3_AIF1 |
| TFEC       | 0.306264614 | 1.00E-168 | CD8.T_CST3_AIF1 |
| RGL1       | 0.423633065 | 3.10E-165 | CD8.T_CST3_AIF1 |
| CD93       | 0.633398065 | 1.25E-164 | CD8.T_CST3_AIF1 |
| GAS2L3     | 0.315488731 | 8.52E-163 | CD8.T_CST3_AIF1 |
| CD33       | 0.306544206 | 1.99E-162 | CD8.T_CST3_AIF1 |
| PLTP       | 0.458145966 | 2.10E-162 | CD8.T_CST3_AIF1 |
| ETV5       | 0.525605916 | 5.81E-162 | CD8.T_CST3_AIF1 |
| IFITM10    | 0.401329358 | 2.47E-160 | CD8.T_CST3_AIF1 |
| AXL        | 0.255510994 | 5.16E-160 | CD8.T_CST3_AIF1 |
| NAGA       | 0.55730971  | 1.12E-159 | CD8.T_CST3_AIF1 |
| PRC1       | 1.066442787 | 1.30E-159 | CD8.T_CST3_AIF1 |
| FCGRT      | 1.739134656 | 2.14E-159 | CD8.T_CST3_AIF1 |
| LILRB5     | 0.497002921 | 4.44E-159 | CD8.T_CST3_AIF1 |
| C1QB       | 3.261768024 | 8.72E-159 | CD8.T_CST3_AIF1 |
| STAC3      | 0.255231049 | 1.51E-157 | CD8.T_CST3_AIF1 |
| TNFAIP2    | 1.004918842 | 6.94E-157 | CD8.T_CST3_AIF1 |
| ZNF503     | 0.265817504 | 6.46E-154 | CD8.T_CST3_AIF1 |
| PLA2G7     | 0.440802774 | 2.28E-153 | CD8.T_CST3_AIF1 |
| CXorf21    | 0.547068259 | 2.79E-153 | CD8.T_CST3_AIF1 |
| HMGB3      | 0.770509901 | 2.12E-152 | CD8.T_CST3_AIF1 |
| CSTA       | 0.479709502 | 4.25E-152 | CD8.T_CST3_AIF1 |
| WDFY4      | 0.597553416 | 1.34E-150 | CD8.T_CST3_AIF1 |
| AURKB      | 0.626143429 | 3.98E-150 | CD8.T_CST3_AIF1 |
| LRRC25     | 0.326595355 | 4.23E-150 | CD8.T_CST3_AIF1 |
| FPR3       | 0.370732392 | 1.08E-148 | CD8.T_CST3_AIF1 |
| LRP1       | 0.499638742 | 1.54E-148 | CD8.T_CST3_AIF1 |
| SLCO2B1    | 0.363602856 | 2.34E-148 | CD8.T_CST3_AIF1 |
| IL6R       | 0.474554775 | 4.12E-148 | CD8.T_CST3_AIF1 |
| PCLAF      | 1.023305393 | 9.67E-148 | CD8.T_CST3_AIF1 |
| CD4        | 0.852802592 | 1.47E-145 | CD8.T_CST3_AIF1 |
| CCL2       | 2.409765629 | 3.40E-145 | CD8.T_CST3_AIF1 |
| CST3       | 4.389403569 | 6.23E-144 | CD8.T_CST3_AIF1 |
| ZC3H12C    | 0.295708222 | 5.31E-142 | CD8.T_CST3_AIF1 |
| FGD2       | 0.380719347 | 3.49E-141 | CD8.T_CST3_AIF1 |
| AL355881.1 | 0.338609088 | 6.11E-141 | CD8.T_CST3_AIF1 |
| HPGDS      | 0.327294302 | 9.53E-141 | CD8.T_CST3_AIF1 |
| CLEC9A     | 0.751524248 | 1.00E-140 | CD8.T_CST3_AIF1 |
| OTOA       | 0.637697789 | 1.19E-139 | CD8.T_CST3_AIF1 |
| TBC1D9     | 0.30375072  | 1.20E-138 | CD8.T_CST3_AIF1 |
| SDS        | 1.065996737 | 1.54E-138 | CD8.T_CST3_AIF1 |
| GAS6       | 0.436765703 | 2.56E-138 | CD8.T_CST3_AIF1 |
| SGK1       | 1.806824781 | 2.88E-138 | CD8.T_CST3_AIF1 |
| A2M        | 1.128036032 | 3.25E-137 | CD8.T_CST3_AIF1 |
| ASPM       | 0.968962266 | 9.90E-137 | CD8.T_CST3_AIF1 |
| TROAP      | 0.566009365 | 1.81E-136 | CD8.T_CST3_AIF1 |
| CTSB       | 2.83471215  | 6.52E-136 | CD8.T_CST3_AIF1 |
| LILRB4     | 0.306264614 | 1.05E-135 | CD8.T_CST3_AIF1 |
| SLC1A3     | 0.275065974 | 1.07E-134 | CD8.T_CST3_AIF1 |
| MELK       | 0.440060682 | 2.44E-133 | CD8.T_CST3_AIF1 |
| SLC7A7     | 0.274926171 | 7.46E-132 | CD8.T_CST3_AIF1 |
| WLS        | 0.307243423 | 2.41E-131 | CD8.T_CST3_AIF1 |
| C5AR1      | 0.796259085 | 1.03E-130 | CD8.T_CST3_AIF1 |
| CCDC88A    | 1.197909554 | 2.15E-129 | CD8.T_CST3_AIF1 |
| CENPA      | 0.427481651 | 5.24E-129 | CD8.T_CST3_AIF1 |
| TK1        | 0.9743178   | 9.44E-129 | CD8.T_CST3_AIF1 |
| PTGS2      | 0.570835128 | 1.05E-127 | CD8.T_CST3_AIF1 |
| ACTN1      | 0.508011384 | 1.62E-127 | CD8.T_CST3_AIF1 |
| CREG1      | 1.101476406 | 5.61E-125 | CD8.T_CST3_AIF1 |
| LY96       | 0.511187455 | 1.12E-124 | CD8.T_CST3_AIF1 |

|          |             |           |                 |
|----------|-------------|-----------|-----------------|
| KIF20A   | 0.285355624 | 3.07E-124 | CD8.T_CST3_AIF1 |
| ITGB5    | 0.263440395 | 1.26E-123 | CD8.T_CST3_AIF1 |
| CNCB1    | 0.766140164 | 2.93E-122 | CD8.T_CST3_AIF1 |
| NUSAP1   | 1.098731648 | 8.96E-122 | CD8.T_CST3_AIF1 |
| EMP2     | 0.323105694 | 1.30E-120 | CD8.T_CST3_AIF1 |
| DMXL2    | 0.379328261 | 1.52E-120 | CD8.T_CST3_AIF1 |
| KIF14    | 0.419403214 | 1.09E-118 | CD8.T_CST3_AIF1 |
| IL1RN    | 0.8827635   | 3.53E-118 | CD8.T_CST3_AIF1 |
| PLXNB2   | 0.313534616 | 2.83E-114 | CD8.T_CST3_AIF1 |
| PDK4     | 0.632597837 | 3.05E-113 | CD8.T_CST3_AIF1 |
| LGALS2   | 0.418660513 | 1.90E-111 | CD8.T_CST3_AIF1 |
| NAV2     | 0.267217635 | 2.63E-110 | CD8.T_CST3_AIF1 |
| MNDA     | 0.674454315 | 2.46E-109 | CD8.T_CST3_AIF1 |
| HES1     | 0.668938272 | 7.28E-109 | CD8.T_CST3_AIF1 |
| SCN1B    | 0.331490168 | 1.33E-108 | CD8.T_CST3_AIF1 |
| PLAUR    | 1.556059998 | 2.16E-108 | CD8.T_CST3_AIF1 |
| NCAPD2   | 0.698022693 | 2.60E-107 | CD8.T_CST3_AIF1 |
| RRM2     | 0.896594097 | 2.42E-106 | CD8.T_CST3_AIF1 |
| KIF4A    | 0.419264965 | 3.31E-105 | CD8.T_CST3_AIF1 |
| IFI30    | 1.817092718 | 2.58E-104 | CD8.T_CST3_AIF1 |
| TNFSF13  | 0.35817526  | 6.20E-104 | CD8.T_CST3_AIF1 |
| SELENOP  | 2.888886517 | 6.66E-104 | CD8.T_CST3_AIF1 |
| GPNMB    | 0.647347393 | 1.25E-103 | CD8.T_CST3_AIF1 |
| DUSP3    | 0.434672072 | 5.84E-103 | CD8.T_CST3_AIF1 |
| RAD51AP1 | 0.549449292 | 5.85E-103 | CD8.T_CST3_AIF1 |
| CALHM6   | 0.603459749 | 1.67E-102 | CD8.T_CST3_AIF1 |
| CENPE    | 0.695527394 | 4.40E-102 | CD8.T_CST3_AIF1 |
| TACC3    | 0.864317398 | 4.54E-102 | CD8.T_CST3_AIF1 |
| DIAPH3   | 0.342507169 | 5.86E-101 | CD8.T_CST3_AIF1 |
| UBE2E2   | 0.25285371  | 3.93E-100 | CD8.T_CST3_AIF1 |
| NPC2     | 2.54373592  | 4.60E-98  | CD8.T_CST3_AIF1 |
| ABL2     | 0.724230758 | 6.28E-98  | CD8.T_CST3_AIF1 |
| SHCBP1   | 0.429278369 | 2.24E-96  | CD8.T_CST3_AIF1 |
| CTSZ     | 2.00184696  | 3.29E-96  | CD8.T_CST3_AIF1 |
| BLVRB    | 1.488141699 | 4.84E-95  | CD8.T_CST3_AIF1 |
| GM2A     | 0.427343535 | 1.97E-94  | CD8.T_CST3_AIF1 |
| TYMS     | 1.204500884 | 3.23E-94  | CD8.T_CST3_AIF1 |
| OGFRL1   | 0.717519499 | 3.93E-94  | CD8.T_CST3_AIF1 |
| NCF4     | 0.595568716 | 5.63E-94  | CD8.T_CST3_AIF1 |
| CKAP2L   | 0.413470447 | 5.67E-94  | CD8.T_CST3_AIF1 |
| SCARB1   | 0.273249594 | 6.61E-94  | CD8.T_CST3_AIF1 |
| SYK      | 0.808599444 | 1.40E-93  | CD8.T_CST3_AIF1 |
| RNF130   | 1.092059482 | 4.06E-92  | CD8.T_CST3_AIF1 |
| BUB1B    | 0.410156977 | 5.14E-92  | CD8.T_CST3_AIF1 |
| TREM2    | 0.346635856 | 5.09E-90  | CD8.T_CST3_AIF1 |
| BASP1    | 0.867222377 | 1.44E-88  | CD8.T_CST3_AIF1 |
| CIT      | 0.315042041 | 1.95E-88  | CD8.T_CST3_AIF1 |
| CENPU    | 0.482892691 | 4.91E-88  | CD8.T_CST3_AIF1 |
| CCL8     | 0.420287037 | 6.94E-85  | CD8.T_CST3_AIF1 |
| PSAP     | 2.463593768 | 2.55E-83  | CD8.T_CST3_AIF1 |
| ATP6V0A1 | 0.38924833  | 8.50E-83  | CD8.T_CST3_AIF1 |
| FGD4     | 0.250619787 | 2.00E-82  | CD8.T_CST3_AIF1 |
| ZWINT    | 0.483484434 | 2.04E-82  | CD8.T_CST3_AIF1 |
| KIF11    | 0.476767745 | 2.39E-81  | CD8.T_CST3_AIF1 |
| PPT1     | 0.966807143 | 8.44E-81  | CD8.T_CST3_AIF1 |
| KIFC1    | 0.535096693 | 1.50E-80  | CD8.T_CST3_AIF1 |
| SLC29A1  | 0.314626179 | 1.76E-80  | CD8.T_CST3_AIF1 |
| HLA-DMB  | 0.892049988 | 1.95E-80  | CD8.T_CST3_AIF1 |
| CENPW    | 0.502157145 | 5.32E-80  | CD8.T_CST3_AIF1 |
| CYFIP1   | 0.389676758 | 1.35E-78  | CD8.T_CST3_AIF1 |
| LYL1     | 0.265590111 | 6.29E-78  | CD8.T_CST3_AIF1 |
| STMN1    | 2.011577651 | 6.95E-78  | CD8.T_CST3_AIF1 |
| RACGAP1  | 0.526434644 | 8.78E-78  | CD8.T_CST3_AIF1 |
| EMILIN2  | 0.467809908 | 3.32E-77  | CD8.T_CST3_AIF1 |



|          |             |          |                 |
|----------|-------------|----------|-----------------|
| MYBL2    | 0.452610648 | 1.20E-76 | CD8.T_CST3_AIF1 |
| CXCL2    | 1.30851525  | 1.23E-76 | CD8.T_CST3_AIF1 |
| HLA-DRA  | 3.339108106 | 1.41E-76 | CD8.T_CST3_AIF1 |
| KIF23    | 0.341601901 | 1.66E-76 | CD8.T_CST3_AIF1 |
| PLXDC2   | 0.261625245 | 1.79E-76 | CD8.T_CST3_AIF1 |
| CXCL1    | 0.782821002 | 2.04E-76 | CD8.T_CST3_AIF1 |
| IL1B     | 1.481867969 | 2.76E-76 | CD8.T_CST3_AIF1 |
| HMOX1    | 0.596615997 | 3.71E-74 | CD8.T_CST3_AIF1 |
| TUBB     | 2.697199008 | 6.53E-74 | CD8.T_CST3_AIF1 |
| CDCA8    | 0.474040314 | 1.24E-73 | CD8.T_CST3_AIF1 |
| HLA-DOA  | 0.258837158 | 4.24E-72 | CD8.T_CST3_AIF1 |
| SLC43A3  | 0.564394499 | 1.54E-71 | CD8.T_CST3_AIF1 |
| ABCA1    | 0.400294391 | 1.76E-71 | CD8.T_CST3_AIF1 |
| C15orf48 | 0.684721912 | 5.20E-71 | CD8.T_CST3_AIF1 |
| TUBA1B   | 2.919125009 | 1.13E-70 | CD8.T_CST3_AIF1 |
| NCAPH    | 0.393657855 | 1.48E-70 | CD8.T_CST3_AIF1 |
| PXDC1    | 0.288597558 | 6.68E-70 | CD8.T_CST3_AIF1 |
| FOXMI    | 0.3682476   | 7.72E-70 | CD8.T_CST3_AIF1 |
| TUBA1C   | 1.674711445 | 1.66E-69 | CD8.T_CST3_AIF1 |
| DAPK1    | 0.279914381 | 1.69E-69 | CD8.T_CST3_AIF1 |
| ANXA5    | 1.539321397 | 1.84E-69 | CD8.T_CST3_AIF1 |
| SPAG5    | 0.2636469   | 3.02E-69 | CD8.T_CST3_AIF1 |
| CENPM    | 0.643132724 | 1.24E-68 | CD8.T_CST3_AIF1 |
| HLA-DRB5 | 2.977878713 | 3.27E-68 | CD8.T_CST3_AIF1 |
| KNL1     | 0.482541276 | 9.20E-68 | CD8.T_CST3_AIF1 |
| BATF3    | 0.425221658 | 1.83E-67 | CD8.T_CST3_AIF1 |
| CXCL3    | 0.837894138 | 4.23E-66 | CD8.T_CST3_AIF1 |
| LIPA     | 1.450254462 | 7.77E-66 | CD8.T_CST3_AIF1 |
| NECTIN2  | 0.26009113  | 1.10E-65 | CD8.T_CST3_AIF1 |
| SPINT2   | 0.430815701 | 9.14E-65 | CD8.T_CST3_AIF1 |
| CNTLN    | 0.294154507 | 1.31E-64 | CD8.T_CST3_AIF1 |
| CTSH     | 0.629758195 | 3.22E-64 | CD8.T_CST3_AIF1 |
| ORC6     | 0.454933286 | 2.65E-63 | CD8.T_CST3_AIF1 |
| SNX8     | 0.403454074 | 3.47E-63 | CD8.T_CST3_AIF1 |
| LGALS3   | 1.422410118 | 6.44E-63 | CD8.T_CST3_AIF1 |
| FSCN1    | 0.322467655 | 1.12E-62 | CD8.T_CST3_AIF1 |
| IMPA2    | 0.378802985 | 1.24E-62 | CD8.T_CST3_AIF1 |
| HMG2     | 1.896963595 | 8.18E-62 | CD8.T_CST3_AIF1 |
| KIF15    | 0.362189318 | 3.19E-61 | CD8.T_CST3_AIF1 |
| RUBCNL   | 0.26274199  | 4.47E-61 | CD8.T_CST3_AIF1 |
| RAB13    | 0.378718674 | 6.60E-61 | CD8.T_CST3_AIF1 |
| BUB1     | 0.274493583 | 4.38E-60 | CD8.T_CST3_AIF1 |
| MMP19    | 0.449225971 | 2.60E-59 | CD8.T_CST3_AIF1 |
| PAK1     | 0.639022105 | 4.79E-59 | CD8.T_CST3_AIF1 |
| MFSD1    | 0.731280669 | 6.53E-59 | CD8.T_CST3_AIF1 |
| SLC16A10 | 0.263300687 | 1.52E-57 | CD8.T_CST3_AIF1 |
| HLA-DMA  | 1.523017556 | 3.37E-57 | CD8.T_CST3_AIF1 |
| C1orf162 | 1.0424705   | 9.80E-57 | CD8.T_CST3_AIF1 |
| MND1     | 0.309368941 | 1.49E-56 | CD8.T_CST3_AIF1 |
| NCF2     | 0.274771078 | 2.79E-56 | CD8.T_CST3_AIF1 |
| NUF2     | 0.498654475 | 3.76E-56 | CD8.T_CST3_AIF1 |
| EVI5     | 0.316567895 | 5.96E-56 | CD8.T_CST3_AIF1 |
| CKS1B    | 0.880567194 | 6.11E-56 | CD8.T_CST3_AIF1 |
| CCR1     | 0.37018525  | 2.14E-55 | CD8.T_CST3_AIF1 |
| TCEAL9   | 0.270180919 | 4.46E-55 | CD8.T_CST3_AIF1 |
| CXCL8    | 1.673735394 | 8.26E-55 | CD8.T_CST3_AIF1 |
| SH2B3    | 0.7826977   | 8.90E-55 | CD8.T_CST3_AIF1 |
| TSPAN33  | 0.363288933 | 1.06E-54 | CD8.T_CST3_AIF1 |
| GPR183   | 1.361982618 | 1.48E-54 | CD8.T_CST3_AIF1 |
| HMGB2    | 1.711520482 | 1.55E-54 | CD8.T_CST3_AIF1 |
| CLEC4A   | 0.259673018 | 2.01E-54 | CD8.T_CST3_AIF1 |
| C21orf58 | 0.347951433 | 3.12E-54 | CD8.T_CST3_AIF1 |
| GAA      | 0.424830345 | 7.24E-54 | CD8.T_CST3_AIF1 |
| ASF1B    | 0.399221492 | 9.39E-54 | CD8.T_CST3_AIF1 |

|           |             |          |                 |
|-----------|-------------|----------|-----------------|
| CLEC11A   | 0.268370674 | 3.35E-53 | CD8.T_CST3_AIF1 |
| UNC93B1   | 0.461815163 | 5.86E-53 | CD8.T_CST3_AIF1 |
| DLGAP5    | 0.326409027 | 6.41E-53 | CD8.T_CST3_AIF1 |
| GSN       | 0.716358565 | 8.45E-53 | CD8.T_CST3_AIF1 |
| FTL       | 2.950558601 | 9.03E-53 | CD8.T_CST3_AIF1 |
| ATF3      | 1.221030315 | 4.43E-52 | CD8.T_CST3_AIF1 |
| ARHGAP11A | 0.368950711 | 4.46E-52 | CD8.T_CST3_AIF1 |
| OTUD1     | 0.556445746 | 3.05E-51 | CD8.T_CST3_AIF1 |
| NLRP3     | 0.355882744 | 3.38E-51 | CD8.T_CST3_AIF1 |
| CD74      | 3.026690038 | 3.62E-51 | CD8.T_CST3_AIF1 |
| PLD3      | 1.120367076 | 4.35E-51 | CD8.T_CST3_AIF1 |
| IL10      | 0.256452089 | 4.59E-51 | CD8.T_CST3_AIF1 |
| SLC43A2   | 0.462044611 | 1.44E-50 | CD8.T_CST3_AIF1 |
| RAC1      | 1.405602322 | 1.51E-49 | CD8.T_CST3_AIF1 |
| SNX9      | 0.548813887 | 6.14E-49 | CD8.T_CST3_AIF1 |
| SGO2      | 0.50779464  | 1.97E-48 | CD8.T_CST3_AIF1 |
| FGL2      | 1.238225212 | 1.29E-47 | CD8.T_CST3_AIF1 |
| BR13      | 1.507138411 | 3.08E-47 | CD8.T_CST3_AIF1 |
| FCGBP     | 0.653509692 | 1.30E-46 | CD8.T_CST3_AIF1 |
| DTYMK     | 0.712629356 | 1.75E-46 | CD8.T_CST3_AIF1 |
| FNIP2     | 0.596635608 | 5.15E-46 | CD8.T_CST3_AIF1 |
| C3AR1     | 0.49422099  | 1.22E-45 | CD8.T_CST3_AIF1 |
| LGALS9    | 0.750272443 | 1.29E-45 | CD8.T_CST3_AIF1 |
| H1FO      | 0.318234306 | 3.44E-45 | CD8.T_CST3_AIF1 |
| ESCO2     | 0.283520512 | 5.26E-45 | CD8.T_CST3_AIF1 |
| CDCA5     | 0.294825951 | 8.97E-45 | CD8.T_CST3_AIF1 |
| VEGFA     | 0.491099948 | 9.56E-45 | CD8.T_CST3_AIF1 |
| AP2S1     | 1.285650147 | 1.48E-44 | CD8.T_CST3_AIF1 |
| CKAP5     | 0.574766193 | 2.10E-44 | CD8.T_CST3_AIF1 |
| GABARAP   | 1.380879353 | 2.17E-44 | CD8.T_CST3_AIF1 |
| FADS1     | 0.416445428 | 2.34E-44 | CD8.T_CST3_AIF1 |
| NFIC      | 0.649868677 | 8.92E-44 | CD8.T_CST3_AIF1 |
| BEX3      | 0.292215214 | 9.38E-44 | CD8.T_CST3_AIF1 |
| SRGAP2B   | 0.314304428 | 2.03E-43 | CD8.T_CST3_AIF1 |
| NPL       | 0.358347252 | 5.78E-43 | CD8.T_CST3_AIF1 |
| CLN6      | 0.315397897 | 1.01E-42 | CD8.T_CST3_AIF1 |
| CEP170    | 0.369372232 | 1.46E-42 | CD8.T_CST3_AIF1 |
| CRTPA     | 0.662247046 | 3.30E-42 | CD8.T_CST3_AIF1 |
| CTNND1    | 0.260598561 | 5.34E-42 | CD8.T_CST3_AIF1 |
| IER3      | 1.912816203 | 2.86E-41 | CD8.T_CST3_AIF1 |
| CALM3     | 1.400698779 | 3.12E-41 | CD8.T_CST3_AIF1 |
| ITGAX     | 0.519818591 | 4.55E-41 | CD8.T_CST3_AIF1 |
| CIP2A     | 0.344804281 | 7.07E-41 | CD8.T_CST3_AIF1 |
| HLA-DPA1  | 2.492204835 | 1.68E-40 | CD8.T_CST3_AIF1 |
| CCL3L1    | 2.664868063 | 2.02E-40 | CD8.T_CST3_AIF1 |
| SAT1      | 1.759109527 | 3.44E-40 | CD8.T_CST3_AIF1 |
| TCF4      | 0.377388546 | 8.66E-40 | CD8.T_CST3_AIF1 |
| PYCARD    | 1.097868158 | 1.26E-39 | CD8.T_CST3_AIF1 |
| HMGB1     | 1.236906592 | 2.94E-39 | CD8.T_CST3_AIF1 |
| SNN       | 0.407756103 | 3.99E-39 | CD8.T_CST3_AIF1 |
| GGH       | 0.365733079 | 5.90E-39 | CD8.T_CST3_AIF1 |
| NEK2      | 0.274493583 | 6.44E-39 | CD8.T_CST3_AIF1 |
| FTH1      | 1.424537879 | 8.51E-39 | CD8.T_CST3_AIF1 |
| YBX1      | 1.096951371 | 1.91E-38 | CD8.T_CST3_AIF1 |
| HJURP     | 0.305744517 | 2.75E-38 | CD8.T_CST3_AIF1 |
| RCAN1     | 0.473647229 | 2.87E-38 | CD8.T_CST3_AIF1 |
| CEBPB     | 1.702199149 | 3.27E-38 | CD8.T_CST3_AIF1 |
| C20orf27  | 0.629241084 | 3.59E-38 | CD8.T_CST3_AIF1 |
| GPSM2     | 0.322992422 | 4.85E-38 | CD8.T_CST3_AIF1 |
| KIAA0930  | 0.508193671 | 5.89E-38 | CD8.T_CST3_AIF1 |
| PHLDA2    | 0.31034178  | 7.74E-38 | CD8.T_CST3_AIF1 |
| NENF      | 0.854709742 | 1.40E-37 | CD8.T_CST3_AIF1 |
| ACTB      | 1.181987827 | 2.79E-37 | CD8.T_CST3_AIF1 |
| SNCA      | 0.335025502 | 4.06E-37 | CD8.T_CST3_AIF1 |

|          |             |          |                 |
|----------|-------------|----------|-----------------|
| RGS10    | 1.218055911 | 4.61E-37 | CD8.T_CST3_AIF1 |
| GBA      | 0.375049187 | 5.76E-37 | CD8.T_CST3_AIF1 |
| GNAS     | 1.120536738 | 9.68E-37 | CD8.T_CST3_AIF1 |
| TMEM14C  | 0.742647565 | 1.04E-36 | CD8.T_CST3_AIF1 |
| CDKN2C   | 0.617932524 | 1.06E-36 | CD8.T_CST3_AIF1 |
| SGO1     | 0.363340034 | 1.08E-36 | CD8.T_CST3_AIF1 |
| YWHAH    | 0.978672483 | 1.38E-36 | CD8.T_CST3_AIF1 |
| HY1      | 0.398222049 | 1.69E-36 | CD8.T_CST3_AIF1 |
| EPB41L2  | 0.364383883 | 2.31E-36 | CD8.T_CST3_AIF1 |
| NUCKS1   | 1.262839483 | 8.90E-36 | CD8.T_CST3_AIF1 |
| IFITM3   | 1.30299927  | 1.16E-35 | CD8.T_CST3_AIF1 |
| RASSF4   | 0.571109122 | 1.27E-35 | CD8.T_CST3_AIF1 |
| EGFL7    | 0.275444928 | 1.46E-35 | CD8.T_CST3_AIF1 |
| UAP1L1   | 0.256038096 | 1.69E-35 | CD8.T_CST3_AIF1 |
| IGFBP4   | 0.555032265 | 2.00E-35 | CD8.T_CST3_AIF1 |
| CCRL2    | 0.311983556 | 7.67E-35 | CD8.T_CST3_AIF1 |
| RHOA     | 0.251336127 | 1.16E-34 | CD8.T_CST3_AIF1 |
| CDK2AP1  | 0.664582281 | 1.20E-34 | CD8.T_CST3_AIF1 |
| CLSPN    | 0.542052818 | 5.26E-34 | CD8.T_CST3_AIF1 |
| SAMHD1   | 0.985302656 | 7.83E-34 | CD8.T_CST3_AIF1 |
| BLVRA    | 0.532768571 | 9.14E-34 | CD8.T_CST3_AIF1 |
| NET1     | 0.270337554 | 1.06E-33 | CD8.T_CST3_AIF1 |
| TPP1     | 0.667916218 | 1.48E-33 | CD8.T_CST3_AIF1 |
| CYB5D1   | 0.563414191 | 2.02E-33 | CD8.T_CST3_AIF1 |
| ATP6V1B2 | 0.660035421 | 3.40E-33 | CD8.T_CST3_AIF1 |
| ADA2     | 0.56421413  | 4.02E-33 | CD8.T_CST3_AIF1 |
| PKMYT1   | 0.262547711 | 5.34E-33 | CD8.T_CST3_AIF1 |
| SPC25    | 0.290289386 | 7.30E-33 | CD8.T_CST3_AIF1 |
| KIF20B   | 0.622899252 | 1.39E-32 | CD8.T_CST3_AIF1 |
| SAC3D1   | 0.407515091 | 2.26E-32 | CD8.T_CST3_AIF1 |
| RNF141   | 0.354489534 | 3.31E-32 | CD8.T_CST3_AIF1 |
| LGALS3BP | 0.287516327 | 4.30E-32 | CD8.T_CST3_AIF1 |
| BRI3BP   | 0.491528691 | 4.52E-32 | CD8.T_CST3_AIF1 |
| H2AFY    | 1.010721995 | 6.81E-32 | CD8.T_CST3_AIF1 |
| GNNG5    | 0.979189074 | 7.40E-32 | CD8.T_CST3_AIF1 |
| H2AFV    | 1.174358241 | 7.67E-32 | CD8.T_CST3_AIF1 |
| NAGK     | 0.637975631 | 1.54E-31 | CD8.T_CST3_AIF1 |
| TCEAL4   | 0.514003836 | 4.83E-31 | CD8.T_CST3_AIF1 |
| SMC4     | 0.853520481 | 1.01E-30 | CD8.T_CST3_AIF1 |
| MCOLN1   | 0.631513528 | 1.74E-30 | CD8.T_CST3_AIF1 |
| HLA-DQA1 | 1.857790241 | 1.80E-30 | CD8.T_CST3_AIF1 |
| RNPEP    | 0.46448186  | 2.70E-30 | CD8.T_CST3_AIF1 |
| HSPA1B   | 1.379249039 | 3.58E-30 | CD8.T_CST3_AIF1 |
| SKA2     | 0.563730546 | 5.87E-30 | CD8.T_CST3_AIF1 |
| GNA15    | 0.401940394 | 7.71E-30 | CD8.T_CST3_AIF1 |
| NUDT1    | 0.80648579  | 8.23E-30 | CD8.T_CST3_AIF1 |
| MPP1     | 0.375049187 | 1.78E-29 | CD8.T_CST3_AIF1 |
| CD9      | 0.501348081 | 1.80E-29 | CD8.T_CST3_AIF1 |
| METTL7A  | 0.396733968 | 1.81E-29 | CD8.T_CST3_AIF1 |
| SOD2     | 1.400711857 | 2.08E-29 | CD8.T_CST3_AIF1 |
| PTTG1IP  | 0.618668826 | 2.22E-29 | CD8.T_CST3_AIF1 |
| COLGALT1 | 0.270507746 | 2.86E-29 | CD8.T_CST3_AIF1 |
| YBX3     | 0.793292686 | 4.30E-29 | CD8.T_CST3_AIF1 |
| S100A9   | 0.535476639 | 4.39E-29 | CD8.T_CST3_AIF1 |
| FABP5    | 1.529530671 | 4.62E-29 | CD8.T_CST3_AIF1 |
| CTSS     | 1.157588204 | 6.70E-29 | CD8.T_CST3_AIF1 |
| SPP1     | 0.31559671  | 7.72E-29 | CD8.T_CST3_AIF1 |
| NCAPG    | 0.252465175 | 9.93E-29 | CD8.T_CST3_AIF1 |
| AMFR     | 0.38372741  | 1.14E-28 | CD8.T_CST3_AIF1 |
| TIMP1    | 1.158435227 | 1.51E-28 | CD8.T_CST3_AIF1 |
| FRMD4B   | 0.481921666 | 1.55E-28 | CD8.T_CST3_AIF1 |
| GNPDA1   | 0.471623079 | 1.79E-28 | CD8.T_CST3_AIF1 |
| CD84     | 0.584662735 | 2.21E-28 | CD8.T_CST3_AIF1 |
| S100A11  | 1.29839779  | 3.52E-28 | CD8.T_CST3_AIF1 |

|          |             |          |                 |
|----------|-------------|----------|-----------------|
| GNS      | 0.435677454 | 4.21E-28 | CD8.T_CST3_AIF1 |
| DHFR     | 0.517721437 | 7.38E-28 | CD8.T_CST3_AIF1 |
| ROGDI    | 0.264539155 | 8.40E-28 | CD8.T_CST3_AIF1 |
| ATOX1    | 0.724771624 | 1.07E-27 | CD8.T_CST3_AIF1 |
| INCENP   | 0.25314347  | 2.13E-27 | CD8.T_CST3_AIF1 |
| AP1B1    | 0.377127087 | 2.64E-27 | CD8.T_CST3_AIF1 |
| SWAP70   | 0.372719985 | 3.16E-27 | CD8.T_CST3_AIF1 |
| HLA-DPB1 | 2.102590886 | 4.46E-27 | CD8.T_CST3_AIF1 |
| GNAI2    | 0.989773714 | 5.56E-27 | CD8.T_CST3_AIF1 |
| MAD2L1   | 0.360349158 | 6.19E-27 | CD8.T_CST3_AIF1 |
| SLC12A7  | 0.275677271 | 6.69E-27 | CD8.T_CST3_AIF1 |
| RHOB     | 0.684503901 | 1.35E-26 | CD8.T_CST3_AIF1 |
| ASAH1    | 0.94231182  | 1.89E-26 | CD8.T_CST3_AIF1 |
| PTTG1    | 1.092956642 | 2.85E-26 | CD8.T_CST3_AIF1 |
| CFD      | 0.266469367 | 2.89E-26 | CD8.T_CST3_AIF1 |
| CTSD     | 1.870032194 | 3.43E-26 | CD8.T_CST3_AIF1 |
| MT-ND1   | 1.438895083 | 4.83E-26 | CD8.T_CST3_AIF1 |
| PTPA     | 0.416704108 | 5.54E-26 | CD8.T_CST3_AIF1 |
| DRAM1    | 0.446281381 | 7.42E-26 | CD8.T_CST3_AIF1 |
| CORO1C   | 0.305722203 | 1.09E-25 | CD8.T_CST3_AIF1 |
| APLP2    | 0.89780194  | 1.38E-25 | CD8.T_CST3_AIF1 |
| CAPG     | 0.619396835 | 1.72E-25 | CD8.T_CST3_AIF1 |
| MZT2B    | 0.845237359 | 1.74E-25 | CD8.T_CST3_AIF1 |
| PRDX3    | 0.7671442   | 1.85E-25 | CD8.T_CST3_AIF1 |
| DEK      | 1.071193451 | 1.88E-25 | CD8.T_CST3_AIF1 |
| LYN      | 0.60095315  | 2.37E-25 | CD8.T_CST3_AIF1 |
| SLC11A2  | 0.324904724 | 8.03E-25 | CD8.T_CST3_AIF1 |
| GAS7     | 0.309000731 | 1.08E-24 | CD8.T_CST3_AIF1 |
| IDO1     | 1.043424997 | 1.18E-24 | CD8.T_CST3_AIF1 |
| SERF2    | 0.769174234 | 1.26E-24 | CD8.T_CST3_AIF1 |
| ADAM15   | 0.256158957 | 2.87E-24 | CD8.T_CST3_AIF1 |
| HLA-DRB1 | 1.970110236 | 4.87E-24 | CD8.T_CST3_AIF1 |
| CYTH4    | 0.407527697 | 5.83E-24 | CD8.T_CST3_AIF1 |
| ZYX      | 0.834062792 | 6.27E-24 | CD8.T_CST3_AIF1 |
| CAMK1    | 0.325488339 | 6.67E-24 | CD8.T_CST3_AIF1 |
| HSBP1    | 0.726374594 | 8.20E-24 | CD8.T_CST3_AIF1 |
| GCA      | 0.356944015 | 2.26E-23 | CD8.T_CST3_AIF1 |
| KLF6     | 1.463227758 | 3.46E-23 | CD8.T_CST3_AIF1 |
| TYROBP   | 1.241368689 | 4.15E-23 | CD8.T_CST3_AIF1 |
| LAIR1    | 0.681172606 | 4.48E-23 | CD8.T_CST3_AIF1 |
| CENPN    | 0.403218555 | 4.49E-23 | CD8.T_CST3_AIF1 |
| HEXB     | 0.52087057  | 4.74E-23 | CD8.T_CST3_AIF1 |
| LST1     | 0.696788006 | 6.21E-23 | CD8.T_CST3_AIF1 |
| THOP1    | 0.250963007 | 6.38E-23 | CD8.T_CST3_AIF1 |
| H2AFZ    | 1.056842048 | 6.63E-23 | CD8.T_CST3_AIF1 |
| EIF4EBP1 | 0.431061942 | 7.06E-23 | CD8.T_CST3_AIF1 |
| H3F3A    | 0.759174766 | 8.41E-23 | CD8.T_CST3_AIF1 |
| CIAO2A   | 0.595744972 | 8.63E-23 | CD8.T_CST3_AIF1 |
| KHSRP    | 0.546771703 | 8.84E-23 | CD8.T_CST3_AIF1 |
| HSPA1A   | 1.675276725 | 1.04E-22 | CD8.T_CST3_AIF1 |
| CD83     | 1.067365055 | 1.14E-22 | CD8.T_CST3_AIF1 |
| BAIAP2   | 0.289755064 | 1.31E-22 | CD8.T_CST3_AIF1 |
| PTMS     | 1.066771907 | 1.45E-22 | CD8.T_CST3_AIF1 |
| OAZ2     | 0.394969658 | 2.14E-22 | CD8.T_CST3_AIF1 |
| ANAPC11  | 0.916165786 | 2.36E-22 | CD8.T_CST3_AIF1 |
| ANP32B   | 0.883598675 | 3.04E-22 | CD8.T_CST3_AIF1 |
| FOS      | 1.435542253 | 3.14E-22 | CD8.T_CST3_AIF1 |
| TMSB10   | 0.683338635 | 3.20E-22 | CD8.T_CST3_AIF1 |
| FOSB     | 1.231250127 | 6.41E-22 | CD8.T_CST3_AIF1 |
| TSPAN3   | 0.300715811 | 7.20E-22 | CD8.T_CST3_AIF1 |
| MCUR1    | 0.524527913 | 8.62E-22 | CD8.T_CST3_AIF1 |
| VIM      | 1.270576797 | 9.90E-22 | CD8.T_CST3_AIF1 |
| DNASE1L3 | 0.537144265 | 1.12E-21 | CD8.T_CST3_AIF1 |
| THEMIS2  | 0.43817929  | 1.38E-21 | CD8.T_CST3_AIF1 |

|         |             |          |                 |
|---------|-------------|----------|-----------------|
| TBXAS1  | 0.358441298 | 4.06E-21 | CD8.T_CST3_AIF1 |
| SPATS2L | 0.538034725 | 5.24E-21 | CD8.T_CST3_AIF1 |
| VPS35   | 0.515779042 | 6.64E-21 | CD8.T_CST3_AIF1 |
| HSPB1   | 0.918189578 | 1.21E-20 | CD8.T_CST3_AIF1 |
| COX8A   | 0.817093561 | 1.31E-20 | CD8.T_CST3_AIF1 |
| GAPDH   | 0.953079911 | 2.28E-20 | CD8.T_CST3_AIF1 |
| RB1     | 0.510453954 | 2.35E-20 | CD8.T_CST3_AIF1 |
| ARAP1   | 0.409222149 | 5.01E-20 | CD8.T_CST3_AIF1 |
| ATP6V0B | 0.797200399 | 7.30E-20 | CD8.T_CST3_AIF1 |
| FLCN    | 0.307405497 | 7.83E-20 | CD8.T_CST3_AIF1 |
| ARL6IP1 | 1.206365551 | 8.37E-20 | CD8.T_CST3_AIF1 |
| GLA     | 0.488265904 | 1.42E-19 | CD8.T_CST3_AIF1 |
| NSD2    | 0.381723367 | 1.46E-19 | CD8.T_CST3_AIF1 |
| FUCA2   | 0.429645789 | 1.51E-19 | CD8.T_CST3_AIF1 |
| ACER3   | 0.310896431 | 2.50E-19 | CD8.T_CST3_AIF1 |
| HSPA6   | 0.464720051 | 3.05E-19 | CD8.T_CST3_AIF1 |
| CSTB    | 0.882435269 | 3.83E-19 | CD8.T_CST3_AIF1 |
| DBNDD2  | 0.434521264 | 3.88E-19 | CD8.T_CST3_AIF1 |
| SESN3   | 0.324177457 | 4.00E-19 | CD8.T_CST3_AIF1 |
| KMT5A   | 0.45240282  | 4.17E-19 | CD8.T_CST3_AIF1 |
| ACSL1   | 0.332652239 | 5.27E-19 | CD8.T_CST3_AIF1 |
| IFI6    | 0.563652009 | 6.70E-19 | CD8.T_CST3_AIF1 |
| CCL3    | 2.196819275 | 6.73E-19 | CD8.T_CST3_AIF1 |
| UQCRQ   | 0.818538231 | 7.34E-19 | CD8.T_CST3_AIF1 |
| MYL6    | 0.670215437 | 1.12E-18 | CD8.T_CST3_AIF1 |
| MAF     | 1.054803445 | 1.54E-18 | CD8.T_CST3_AIF1 |
| SMCO4   | 0.256260466 | 1.93E-18 | CD8.T_CST3_AIF1 |
| TRIOBP  | 0.353596753 | 2.21E-18 | CD8.T_CST3_AIF1 |
| COTL1   | 1.108249099 | 4.19E-18 | CD8.T_CST3_AIF1 |
| LGALS1  | 1.720114378 | 4.23E-18 | CD8.T_CST3_AIF1 |
| MT-ND2  | 1.187649826 | 5.38E-18 | CD8.T_CST3_AIF1 |
| CCDC34  | 0.31517689  | 6.83E-18 | CD8.T_CST3_AIF1 |
| AP2A2   | 0.373758527 | 7.32E-18 | CD8.T_CST3_AIF1 |
| GNAQ    | 0.310638495 | 7.64E-18 | CD8.T_CST3_AIF1 |
| CKAP2   | 0.594875181 | 9.93E-18 | CD8.T_CST3_AIF1 |
| GATM    | 0.255720484 | 1.42E-17 | CD8.T_CST3_AIF1 |
| UCP2    | 0.730567539 | 1.86E-17 | CD8.T_CST3_AIF1 |
| GNB2    | 0.782944988 | 2.09E-17 | CD8.T_CST3_AIF1 |
| ATP5MF  | 0.742780242 | 2.60E-17 | CD8.T_CST3_AIF1 |
| SOX4    | 0.331600998 | 3.79E-17 | CD8.T_CST3_AIF1 |
| SPG21   | 0.430897904 | 4.53E-17 | CD8.T_CST3_AIF1 |
| DENND1A | 0.27775302  | 5.87E-17 | CD8.T_CST3_AIF1 |
| NME2    | 0.801624848 | 7.56E-17 | CD8.T_CST3_AIF1 |
| DAPP1   | 0.251645617 | 8.77E-17 | CD8.T_CST3_AIF1 |
| KLF7    | 0.263777572 | 1.41E-16 | CD8.T_CST3_AIF1 |
| BLOC1S1 | 0.750715482 | 1.61E-16 | CD8.T_CST3_AIF1 |
| HADH    | 0.378839025 | 1.95E-16 | CD8.T_CST3_AIF1 |
| RAB34   | 0.254776003 | 3.91E-16 | CD8.T_CST3_AIF1 |
| SCARB2  | 0.358359873 | 5.93E-16 | CD8.T_CST3_AIF1 |
| COPST7A | 0.262826778 | 6.20E-16 | CD8.T_CST3_AIF1 |
| P2RX7   | 0.382491007 | 6.69E-16 | CD8.T_CST3_AIF1 |
| APOE    | 1.329819597 | 7.83E-16 | CD8.T_CST3_AIF1 |
| CD59    | 0.578044027 | 7.90E-16 | CD8.T_CST3_AIF1 |
| TSPAN4  | 0.262078065 | 8.79E-16 | CD8.T_CST3_AIF1 |
| GLUL    | 0.738280537 | 8.85E-16 | CD8.T_CST3_AIF1 |
| TALDO1  | 0.729212779 | 1.20E-15 | CD8.T_CST3_AIF1 |
| ETS2    | 0.536977257 | 1.23E-15 | CD8.T_CST3_AIF1 |
| RPL39L  | 0.34019282  | 1.40E-15 | CD8.T_CST3_AIF1 |
| FCER1G  | 0.87889447  | 1.40E-15 | CD8.T_CST3_AIF1 |
| VAT1    | 0.280713336 | 1.57E-15 | CD8.T_CST3_AIF1 |
| NCOA4   | 0.377496756 | 1.61E-15 | CD8.T_CST3_AIF1 |
| YWHAE   | 0.684908699 | 1.62E-15 | CD8.T_CST3_AIF1 |
| GRINA   | 0.338323656 | 2.13E-15 | CD8.T_CST3_AIF1 |
| ATP1B1  | 0.442329818 | 2.73E-15 | CD8.T_CST3_AIF1 |

|            |             |          |                 |
|------------|-------------|----------|-----------------|
| REEP4      | 0.291396495 | 3.36E-15 | CD8.T_CST3_AIF1 |
| LMNB1      | 0.45704566  | 3.66E-15 | CD8.T_CST3_AIF1 |
| VAMP8      | 0.718638166 | 3.98E-15 | CD8.T_CST3_AIF1 |
| SMC2       | 0.434521264 | 4.24E-15 | CD8.T_CST3_AIF1 |
| COPRS      | 0.252610724 | 4.56E-15 | CD8.T_CST3_AIF1 |
| VAMP3      | 0.311033592 | 4.63E-15 | CD8.T_CST3_AIF1 |
| PEA15      | 0.323913421 | 4.76E-15 | CD8.T_CST3_AIF1 |
| NR4A1      | 0.912848527 | 4.84E-15 | CD8.T_CST3_AIF1 |
| PCBP2      | 0.701481528 | 5.05E-15 | CD8.T_CST3_AIF1 |
| CEBPD      | 0.82593316  | 5.77E-15 | CD8.T_CST3_AIF1 |
| KIF22      | 0.409498447 | 7.05E-15 | CD8.T_CST3_AIF1 |
| TMPO       | 0.6091076   | 7.54E-15 | CD8.T_CST3_AIF1 |
| ATP6V0C    | 0.692896728 | 8.54E-15 | CD8.T_CST3_AIF1 |
| MAFG       | 0.365488131 | 1.22E-14 | CD8.T_CST3_AIF1 |
| MAN2B1     | 0.462240332 | 1.44E-14 | CD8.T_CST3_AIF1 |
| FAM111A    | 0.675473951 | 1.62E-14 | CD8.T_CST3_AIF1 |
| PAPSS1     | 0.28394005  | 1.81E-14 | CD8.T_CST3_AIF1 |
| COMMD4     | 0.522508262 | 2.11E-14 | CD8.T_CST3_AIF1 |
| ARPC5      | 0.690986541 | 2.15E-14 | CD8.T_CST3_AIF1 |
| RHOA       | 0.696633635 | 3.18E-14 | CD8.T_CST3_AIF1 |
| ANKRD9     | 0.279928111 | 4.61E-14 | CD8.T_CST3_AIF1 |
| ATP5PD     | 0.690289394 | 4.86E-14 | CD8.T_CST3_AIF1 |
| MGAT1      | 0.646263416 | 4.90E-14 | CD8.T_CST3_AIF1 |
| CLTA       | 0.746994616 | 6.05E-14 | CD8.T_CST3_AIF1 |
| SNX10      | 0.552778949 | 7.12E-14 | CD8.T_CST3_AIF1 |
| CADM1      | 0.439922261 | 7.49E-14 | CD8.T_CST3_AIF1 |
| LIMS1      | 0.585114664 | 7.94E-14 | CD8.T_CST3_AIF1 |
| APOC1      | 1.283423356 | 9.34E-14 | CD8.T_CST3_AIF1 |
| ETV6       | 0.346770111 | 9.44E-14 | CD8.T_CST3_AIF1 |
| EMC9       | 0.256243106 | 1.43E-13 | CD8.T_CST3_AIF1 |
| RANGAP1    | 0.35056524  | 1.46E-13 | CD8.T_CST3_AIF1 |
| RPS17      | 0.634389604 | 1.56E-13 | CD8.T_CST3_AIF1 |
| NUP214     | 0.445812273 | 1.69E-13 | CD8.T_CST3_AIF1 |
| WASHC4     | 0.403907972 | 1.70E-13 | CD8.T_CST3_AIF1 |
| ICAM4      | 0.260183377 | 2.04E-13 | CD8.T_CST3_AIF1 |
| RHEB       | 0.644788948 | 2.07E-13 | CD8.T_CST3_AIF1 |
| PFKL       | 0.348539362 | 2.11E-13 | CD8.T_CST3_AIF1 |
| IL18       | 0.307697617 | 2.26E-13 | CD8.T_CST3_AIF1 |
| LAPTM5     | 0.824740127 | 2.45E-13 | CD8.T_CST3_AIF1 |
| AKR1B1     | 0.513045461 | 2.81E-13 | CD8.T_CST3_AIF1 |
| DCAF12     | 0.300199221 | 3.22E-13 | CD8.T_CST3_AIF1 |
| ANXA2      | 0.832879993 | 3.78E-13 | CD8.T_CST3_AIF1 |
| BARD1      | 0.362114858 | 4.36E-13 | CD8.T_CST3_AIF1 |
| FKBP1A     | 0.677100675 | 4.68E-13 | CD8.T_CST3_AIF1 |
| BX284668.5 | 0.387673518 | 4.74E-13 | CD8.T_CST3_AIF1 |
| HEBP1      | 0.312093989 | 5.56E-13 | CD8.T_CST3_AIF1 |
| ARL8B      | 0.445348221 | 6.34E-13 | CD8.T_CST3_AIF1 |
| HLA-DQB1   | 1.665453044 | 6.36E-13 | CD8.T_CST3_AIF1 |
| NCF1       | 0.455255496 | 1.23E-12 | CD8.T_CST3_AIF1 |
| AP1S2      | 0.581551198 | 1.31E-12 | CD8.T_CST3_AIF1 |
| STX7       | 0.346562839 | 1.63E-12 | CD8.T_CST3_AIF1 |
| ATAD5      | 0.265841324 | 2.05E-12 | CD8.T_CST3_AIF1 |
| GEM        | 0.548273332 | 2.06E-12 | CD8.T_CST3_AIF1 |
| PLEKHO2    | 0.325437979 | 2.26E-12 | CD8.T_CST3_AIF1 |
| HIST1H4C   | 1.499752859 | 3.11E-12 | CD8.T_CST3_AIF1 |
| PCNA       | 0.69464808  | 3.22E-12 | CD8.T_CST3_AIF1 |
| NFIA       | 0.267718437 | 4.40E-12 | CD8.T_CST3_AIF1 |
| VMA21      | 0.433517523 | 4.55E-12 | CD8.T_CST3_AIF1 |
| MRPL23     | 0.476466118 | 4.93E-12 | CD8.T_CST3_AIF1 |
| PPIA       | 0.580965914 | 9.21E-12 | CD8.T_CST3_AIF1 |
| PHACTR4    | 0.464962248 | 1.28E-11 | CD8.T_CST3_AIF1 |
| C6orf62    | 0.524472476 | 1.34E-11 | CD8.T_CST3_AIF1 |
| HDLBP      | 0.432787977 | 1.50E-11 | CD8.T_CST3_AIF1 |
| UQC2       | 0.469926101 | 1.66E-11 | CD8.T_CST3_AIF1 |

|          |             |          |                 |
|----------|-------------|----------|-----------------|
| DSE      | 0.31129705  | 1.73E-11 | CD8.T_CST3_AIF1 |
| CENPK    | 0.40086988  | 1.99E-11 | CD8.T_CST3_AIF1 |
| KPNA2    | 0.712983759 | 2.58E-11 | CD8.T_CST3_AIF1 |
| MGST2    | 0.251291595 | 2.61E-11 | CD8.T_CST3_AIF1 |
| MPDU1    | 0.324132853 | 2.89E-11 | CD8.T_CST3_AIF1 |
| WWP1     | 0.441642667 | 3.22E-11 | CD8.T_CST3_AIF1 |
| PLEKHO1  | 0.616424432 | 4.16E-11 | CD8.T_CST3_AIF1 |
| LSM5     | 0.479507145 | 4.67E-11 | CD8.T_CST3_AIF1 |
| PCBP1    | 0.576601211 | 5.54E-11 | CD8.T_CST3_AIF1 |
| SLC66A2  | 0.320300806 | 6.51E-11 | CD8.T_CST3_AIF1 |
| HELLS    | 0.318365947 | 7.34E-11 | CD8.T_CST3_AIF1 |
| ARHGAP4  | 0.467666611 | 7.49E-11 | CD8.T_CST3_AIF1 |
| EPS8     | 0.312878808 | 7.87E-11 | CD8.T_CST3_AIF1 |
| SMIM4    | 0.311555285 | 8.00E-11 | CD8.T_CST3_AIF1 |
| NADK     | 0.272956686 | 8.11E-11 | CD8.T_CST3_AIF1 |
| ATP6V0D1 | 0.560779205 | 8.90E-11 | CD8.T_CST3_AIF1 |
| HIRIP3   | 0.270075219 | 9.65E-11 | CD8.T_CST3_AIF1 |
| NDUFB1   | 0.684579889 | 1.06E-10 | CD8.T_CST3_AIF1 |
| RIPOR1   | 0.260842269 | 1.06E-10 | CD8.T_CST3_AIF1 |
| RNASET2  | 0.641389372 | 1.23E-10 | CD8.T_CST3_AIF1 |
| APH1A    | 0.458572543 | 1.24E-10 | CD8.T_CST3_AIF1 |
| AAMDC    | 0.272018174 | 1.75E-10 | CD8.T_CST3_AIF1 |
| TFDP1    | 0.387397169 | 1.98E-10 | CD8.T_CST3_AIF1 |
| NME4     | 0.450817305 | 2.33E-10 | CD8.T_CST3_AIF1 |
| PLIN3    | 0.303726372 | 2.47E-10 | CD8.T_CST3_AIF1 |
| PGD      | 0.291541813 | 2.54E-10 | CD8.T_CST3_AIF1 |
| CD63     | 0.82860311  | 2.57E-10 | CD8.T_CST3_AIF1 |
| RBPJ     | 0.496224835 | 2.61E-10 | CD8.T_CST3_AIF1 |
| TRPS1    | 0.255771681 | 2.63E-10 | CD8.T_CST3_AIF1 |
| CALM2    | 0.607395575 | 2.68E-10 | CD8.T_CST3_AIF1 |
| FUOM     | 0.315887725 | 3.01E-10 | CD8.T_CST3_AIF1 |
| HERC5    | 0.357775511 | 3.02E-10 | CD8.T_CST3_AIF1 |
| CCDC50   | 0.308420187 | 3.29E-10 | CD8.T_CST3_AIF1 |
| RDX      | 0.3736167   | 3.66E-10 | CD8.T_CST3_AIF1 |
| CNPY3    | 0.514282724 | 4.39E-10 | CD8.T_CST3_AIF1 |
| P4HB     | 0.546074261 | 5.07E-10 | CD8.T_CST3_AIF1 |
| WSB1     | 0.828910973 | 5.11E-10 | CD8.T_CST3_AIF1 |
| CLTC     | 0.42336024  | 6.38E-10 | CD8.T_CST3_AIF1 |
| PTPRE    | 0.606126765 | 6.40E-10 | CD8.T_CST3_AIF1 |
| ARPC3    | 0.566323215 | 6.71E-10 | CD8.T_CST3_AIF1 |
| ATG3     | 0.687190247 | 7.09E-10 | CD8.T_CST3_AIF1 |
| MIS18BP1 | 0.543656847 | 8.22E-10 | CD8.T_CST3_AIF1 |
| AURKA    | 0.273861816 | 9.01E-10 | CD8.T_CST3_AIF1 |
| TPM3     | 0.501432575 | 9.68E-10 | CD8.T_CST3_AIF1 |
| GPX4     | 0.651306255 | 1.01E-09 | CD8.T_CST3_AIF1 |
| RPS20    | 0.569963643 | 1.31E-09 | CD8.T_CST3_AIF1 |
| RAD21    | 0.500817548 | 1.69E-09 | CD8.T_CST3_AIF1 |
| ACTR2    | 0.680001304 | 1.80E-09 | CD8.T_CST3_AIF1 |
| PHF19    | 0.40749268  | 1.82E-09 | CD8.T_CST3_AIF1 |
| ASAP1    | 0.386803698 | 1.99E-09 | CD8.T_CST3_AIF1 |
| AGGF1    | 0.256658184 | 2.16E-09 | CD8.T_CST3_AIF1 |
| ZSWIM6   | 0.265276419 | 2.80E-09 | CD8.T_CST3_AIF1 |
| JPT1     | 0.885398448 | 2.90E-09 | CD8.T_CST3_AIF1 |
| STAT2    | 0.29518324  | 3.78E-09 | CD8.T_CST3_AIF1 |
| EPN1     | 0.325636568 | 3.79E-09 | CD8.T_CST3_AIF1 |
| HAUS4    | 0.280489895 | 4.12E-09 | CD8.T_CST3_AIF1 |
| EDEM1    | 0.300804803 | 4.54E-09 | CD8.T_CST3_AIF1 |
| TUBA1A   | 0.817808058 | 4.79E-09 | CD8.T_CST3_AIF1 |
| RPL26L1  | 0.314099049 | 6.05E-09 | CD8.T_CST3_AIF1 |
| GRB2     | 0.540785661 | 6.05E-09 | CD8.T_CST3_AIF1 |
| RPN1     | 0.39849662  | 6.24E-09 | CD8.T_CST3_AIF1 |
| LAMP2    | 0.372719985 | 1.08E-08 | CD8.T_CST3_AIF1 |
| HNRNPUL1 | 0.456627124 | 1.11E-08 | CD8.T_CST3_AIF1 |
| LSM4     | 0.508858967 | 1.11E-08 | CD8.T_CST3_AIF1 |

|           |             |          |                 |
|-----------|-------------|----------|-----------------|
| RAP2A     | 0.297008281 | 1.35E-08 | CD8.T_CST3_AIF1 |
| TMEM219   | 0.497299953 | 1.51E-08 | CD8.T_CST3_AIF1 |
| MT-ND4    | 0.641157958 | 1.74E-08 | CD8.T_CST3_AIF1 |
| LRRC58    | 0.298918033 | 1.81E-08 | CD8.T_CST3_AIF1 |
| SNX2      | 0.430999881 | 1.82E-08 | CD8.T_CST3_AIF1 |
| TMEM106C  | 0.360504261 | 1.83E-08 | CD8.T_CST3_AIF1 |
| PGLS      | 0.487436156 | 2.42E-08 | CD8.T_CST3_AIF1 |
| SLC25A24  | 0.262645685 | 2.44E-08 | CD8.T_CST3_AIF1 |
| SNX29     | 0.261583286 | 2.49E-08 | CD8.T_CST3_AIF1 |
| ATP6V1F   | 0.605678965 | 2.62E-08 | CD8.T_CST3_AIF1 |
| MKNK1     | 0.346949603 | 2.67E-08 | CD8.T_CST3_AIF1 |
| ATP5F1E   | 0.425280611 | 2.92E-08 | CD8.T_CST3_AIF1 |
| H2AFX     | 0.518750039 | 3.09E-08 | CD8.T_CST3_AIF1 |
| MAP3K11   | 0.316423777 | 3.87E-08 | CD8.T_CST3_AIF1 |
| LINC00963 | 0.294305471 | 4.04E-08 | CD8.T_CST3_AIF1 |
| TRAPPC5   | 0.580894968 | 4.66E-08 | CD8.T_CST3_AIF1 |
| MAP3K3    | 0.26303576  | 4.66E-08 | CD8.T_CST3_AIF1 |
| BNIP3L    | 0.480924458 | 4.79E-08 | CD8.T_CST3_AIF1 |
| RRAGC     | 0.378120044 | 5.18E-08 | CD8.T_CST3_AIF1 |
| C4orf48   | 0.331594    | 5.61E-08 | CD8.T_CST3_AIF1 |
| NCAPH2    | 0.260974864 | 6.19E-08 | CD8.T_CST3_AIF1 |
| RTN4      | 0.563891243 | 7.07E-08 | CD8.T_CST3_AIF1 |
| MYO5A     | 0.258361798 | 7.44E-08 | CD8.T_CST3_AIF1 |
| DCK       | 0.392030548 | 7.60E-08 | CD8.T_CST3_AIF1 |
| UBAP2L    | 0.326974097 | 8.44E-08 | CD8.T_CST3_AIF1 |
| EGR1      | 0.3837557   | 9.90E-08 | CD8.T_CST3_AIF1 |
| ANKRD36C  | 0.415745694 | 1.12E-07 | CD8.T_CST3_AIF1 |
| M6PR      | 0.476021236 | 1.18E-07 | CD8.T_CST3_AIF1 |
| SIVA1     | 0.604438323 | 1.23E-07 | CD8.T_CST3_AIF1 |
| PABPC4    | 0.410765386 | 1.24E-07 | CD8.T_CST3_AIF1 |
| PKM       | 0.608026566 | 1.53E-07 | CD8.T_CST3_AIF1 |
| LAP3      | 0.369648005 | 1.73E-07 | CD8.T_CST3_AIF1 |
| RPLP0     | 0.514810211 | 1.78E-07 | CD8.T_CST3_AIF1 |
| APOA2     | 1.034246753 | 1.82E-07 | CD8.T_CST3_AIF1 |
| CTNNA1    | 0.282148948 | 2.03E-07 | CD8.T_CST3_AIF1 |
| CKS2      | 0.541697809 | 2.20E-07 | CD8.T_CST3_AIF1 |
| IRAK1     | 0.262787915 | 2.22E-07 | CD8.T_CST3_AIF1 |
| TYMP      | 0.576776949 | 2.30E-07 | CD8.T_CST3_AIF1 |
| RNH1      | 0.587886879 | 2.40E-07 | CD8.T_CST3_AIF1 |
| PTEN      | 0.379688408 | 2.60E-07 | CD8.T_CST3_AIF1 |
| TMEM176B  | 0.298835634 | 2.68E-07 | CD8.T_CST3_AIF1 |
| SERPINB6  | 0.406484546 | 2.85E-07 | CD8.T_CST3_AIF1 |
| ARPC1B    | 0.484879027 | 3.54E-07 | CD8.T_CST3_AIF1 |
| DCAF7     | 0.355623567 | 3.54E-07 | CD8.T_CST3_AIF1 |
| GOLIM4    | 0.284440626 | 3.61E-07 | CD8.T_CST3_AIF1 |
| DDAH2     | 0.331273303 | 3.70E-07 | CD8.T_CST3_AIF1 |
| HEXA      | 0.542760592 | 3.88E-07 | CD8.T_CST3_AIF1 |
| CMTM6     | 0.5392518   | 4.20E-07 | CD8.T_CST3_AIF1 |
| IFI27     | 0.403808227 | 4.42E-07 | CD8.T_CST3_AIF1 |
| QKI       | 0.419746128 | 4.67E-07 | CD8.T_CST3_AIF1 |
| PRKACA    | 0.273345896 | 5.72E-07 | CD8.T_CST3_AIF1 |
| RUNX1     | 0.434497711 | 8.48E-07 | CD8.T_CST3_AIF1 |
| MGST3     | 0.568751176 | 8.82E-07 | CD8.T_CST3_AIF1 |
| CDC25B    | 0.30488999  | 9.15E-07 | CD8.T_CST3_AIF1 |
| PARVB     | 0.325214093 | 1.00E-06 | CD8.T_CST3_AIF1 |
| SUMO3     | 0.399904034 | 1.01E-06 | CD8.T_CST3_AIF1 |
| LAMTOR2   | 0.398561573 | 1.08E-06 | CD8.T_CST3_AIF1 |
| LPAR6     | 0.285227336 | 1.17E-06 | CD8.T_CST3_AIF1 |
| AKR1A1    | 0.390516183 | 1.19E-06 | CD8.T_CST3_AIF1 |
| MYD88     | 0.314678848 | 1.30E-06 | CD8.T_CST3_AIF1 |
| CAPZA2    | 0.440132461 | 1.33E-06 | CD8.T_CST3_AIF1 |
| MT1G      | 0.405486152 | 1.34E-06 | CD8.T_CST3_AIF1 |
| CNTRL     | 0.403408496 | 1.39E-06 | CD8.T_CST3_AIF1 |
| NPTN      | 0.305427954 | 1.48E-06 | CD8.T_CST3_AIF1 |



|          |             |             |                 |
|----------|-------------|-------------|-----------------|
| COX5A    | 0.540914314 | 1.49E-06    | CD8.T_CST3_AIF1 |
| SNRPD1   | 0.476858295 | 1.52E-06    | CD8.T_CST3_AIF1 |
| RCC2     | 0.369796216 | 1.67E-06    | CD8.T_CST3_AIF1 |
| MSRA     | 0.257111441 | 1.74E-06    | CD8.T_CST3_AIF1 |
| SDCCAG8  | 0.250600717 | 1.93E-06    | CD8.T_CST3_AIF1 |
| PCBD1    | 0.350819706 | 2.27E-06    | CD8.T_CST3_AIF1 |
| GSTO1    | 0.503117266 | 2.56E-06    | CD8.T_CST3_AIF1 |
| ALYREF   | 0.507643378 | 2.79E-06    | CD8.T_CST3_AIF1 |
| IL10RB   | 0.332796822 | 2.90E-06    | CD8.T_CST3_AIF1 |
| IDH2     | 0.543026519 | 3.36E-06    | CD8.T_CST3_AIF1 |
| SGK3     | 0.339179691 | 4.06E-06    | CD8.T_CST3_AIF1 |
| RAB5C    | 0.499557065 | 5.41E-06    | CD8.T_CST3_AIF1 |
| PIIF     | 0.517760839 | 5.42E-06    | CD8.T_CST3_AIF1 |
| H1FX     | 0.469169804 | 5.74E-06    | CD8.T_CST3_AIF1 |
| TACC1    | 0.467849389 | 6.68E-06    | CD8.T_CST3_AIF1 |
| PPP1R15A | 0.547355476 | 6.88E-06    | CD8.T_CST3_AIF1 |
| ZFP36L1  | 0.620614471 | 7.11E-06    | CD8.T_CST3_AIF1 |
| ENY2     | 0.476802085 | 7.19E-06    | CD8.T_CST3_AIF1 |
| VOPP1    | 0.345721854 | 9.24E-06    | CD8.T_CST3_AIF1 |
| GD12     | 0.502957543 | 1.08E-05    | CD8.T_CST3_AIF1 |
| ARHGAP17 | 0.256436753 | 1.21E-05    | CD8.T_CST3_AIF1 |
| CBX5     | 0.303084281 | 1.33E-05    | CD8.T_CST3_AIF1 |
| GNG10    | 0.398543148 | 1.46E-05    | CD8.T_CST3_AIF1 |
| PTBP1    | 0.436481382 | 1.47E-05    | CD8.T_CST3_AIF1 |
| HP1BP3   | 0.573297036 | 1.47E-05    | CD8.T_CST3_AIF1 |
| ATAD2    | 0.427190172 | 1.58E-05    | CD8.T_CST3_AIF1 |
| SAMD1    | 0.257459046 | 1.66E-05    | CD8.T_CST3_AIF1 |
| ITPK1    | 0.262775698 | 1.98E-05    | CD8.T_CST3_AIF1 |
| SNX3     | 1.008173931 | 2.04E-05    | CD8.T_CST3_AIF1 |
| GNA13    | 0.447739801 | 2.20E-05    | CD8.T_CST3_AIF1 |
| COX6B1   | 0.411358932 | 3.10E-05    | CD8.T_CST3_AIF1 |
| PLEKHB2  | 0.379733352 | 3.60E-05    | CD8.T_CST3_AIF1 |
| NRIP1    | 0.274744826 | 3.83E-05    | CD8.T_CST3_AIF1 |
| AGPAT2   | 0.263485708 | 4.08E-05    | CD8.T_CST3_AIF1 |
| CNDP2    | 0.277695317 | 4.34E-05    | CD8.T_CST3_AIF1 |
| POMP     | 0.51141656  | 5.65E-05    | CD8.T_CST3_AIF1 |
| NSL1     | 0.26291445  | 5.88E-05    | CD8.T_CST3_AIF1 |
| DDX39A   | 0.451723599 | 5.92E-05    | CD8.T_CST3_AIF1 |
| LAMTOR4  | 0.465565432 | 6.20E-05    | CD8.T_CST3_AIF1 |
| ADIPOR1  | 0.330188024 | 6.49E-05    | CD8.T_CST3_AIF1 |
| HMGAI    | 0.439871267 | 6.51E-05    | CD8.T_CST3_AIF1 |
| NAP1L1   | 0.582019225 | 6.76E-05    | CD8.T_CST3_AIF1 |
| FAM120A  | 0.313986753 | 6.79E-05    | CD8.T_CST3_AIF1 |
| GNB1     | 0.486003104 | 6.94E-05    | CD8.T_CST3_AIF1 |
| VEGFB    | 0.393488856 | 7.32E-05    | CD8.T_CST3_AIF1 |
| ATF4     | 0.470347589 | 7.41E-05    | CD8.T_CST3_AIF1 |
| SDCBP    | 0.476675333 | 7.45E-05    | CD8.T_CST3_AIF1 |
| MCM7     | 0.392289039 | 7.98E-05    | CD8.T_CST3_AIF1 |
| BANF1    | 0.403027988 | 8.30E-05    | CD8.T_CST3_AIF1 |
| YTHDF3   | 0.293662734 | 8.82E-05    | CD8.T_CST3_AIF1 |
| UQCR10   | 0.396992363 | 0.000101199 | CD8.T_CST3_AIF1 |
| NUP62    | 0.266816066 | 0.0001075   | CD8.T_CST3_AIF1 |
| PLEK     | 0.65180388  | 0.00011266  | CD8.T_CST3_AIF1 |
| SEPTIN11 | 0.357078066 | 0.000136    | CD8.T_CST3_AIF1 |
| MCM5     | 0.258201999 | 0.000136301 | CD8.T_CST3_AIF1 |
| MTMR14   | 0.258276523 | 0.000160975 | CD8.T_CST3_AIF1 |
| VPS29    | 0.417748769 | 0.000161389 | CD8.T_CST3_AIF1 |
| SNX5     | 0.304307371 | 0.000189221 | CD8.T_CST3_AIF1 |
| NAMPT    | 0.622267574 | 0.0002026   | CD8.T_CST3_AIF1 |
| CAPZB    | 0.491422392 | 0.000216784 | CD8.T_CST3_AIF1 |
| TUBB4B   | 0.474873696 | 0.000222326 | CD8.T_CST3_AIF1 |
| UQCR11   | 0.409085105 | 0.000231577 | CD8.T_CST3_AIF1 |
| KLF10    | 0.294115028 | 0.000258063 | CD8.T_CST3_AIF1 |
| NRARP    | 0.360945176 | 0.000271238 | CD8.T_CST3_AIF1 |

|          |             |             |                 |
|----------|-------------|-------------|-----------------|
| PTPN18   | 0.252391606 | 0.000351154 | CD8.T_CST3_AIF1 |
| TXNDC17  | 0.368895868 | 0.000460211 | CD8.T_CST3_AIF1 |
| DBI      | 0.439718925 | 0.000537066 | CD8.T_CST3_AIF1 |
| IFNGR1   | 0.436165306 | 0.000580852 | CD8.T_CST3_AIF1 |
| AZIN1    | 0.277087639 | 0.000616604 | CD8.T_CST3_AIF1 |
| AKT1     | 0.324725995 | 0.000636907 | CD8.T_CST3_AIF1 |
| NANS     | 0.363841441 | 0.000644704 | CD8.T_CST3_AIF1 |
| NDUFC1   | 0.333846489 | 0.000675103 | CD8.T_CST3_AIF1 |
| USF2     | 0.330232784 | 0.000701796 | CD8.T_CST3_AIF1 |
| PIEZO1   | 0.253199296 | 0.000854774 | CD8.T_CST3_AIF1 |
| AP1M1    | 0.26725966  | 0.000903507 | CD8.T_CST3_AIF1 |
| WASF2    | 0.445690193 | 0.000917663 | CD8.T_CST3_AIF1 |
| GYPC     | 0.570648963 | 0.001045431 | CD8.T_CST3_AIF1 |
| ARRB2    | 0.375456342 | 0.001245    | CD8.T_CST3_AIF1 |
| VKORC1   | 0.329638242 | 0.001311755 | CD8.T_CST3_AIF1 |
| HADHA    | 0.332628963 | 0.001353846 | CD8.T_CST3_AIF1 |
| CTSA     | 0.343645701 | 0.001423712 | CD8.T_CST3_AIF1 |
| SH3BP5   | 0.355477968 | 0.001473669 | CD8.T_CST3_AIF1 |
| SPAG9    | 0.455802925 | 0.001499643 | CD8.T_CST3_AIF1 |
| GUSB     | 0.324302932 | 0.001521117 | CD8.T_CST3_AIF1 |
| CDK5RAP2 | 0.25420943  | 0.001614809 | CD8.T_CST3_AIF1 |
| AUP1     | 0.311611004 | 0.001885703 | CD8.T_CST3_AIF1 |
| NR4A3    | 0.60507362  | 0.001999846 | CD8.T_CST3_AIF1 |
| PTMA     | 0.28612239  | 0.002042505 | CD8.T_CST3_AIF1 |
| XPO1     | 0.316163981 | 0.002083383 | CD8.T_CST3_AIF1 |
| ATP5PO   | 0.39394581  | 0.002154608 | CD8.T_CST3_AIF1 |
| CYB5R3   | 0.319152162 | 0.002223997 | CD8.T_CST3_AIF1 |
| TMEM258  | 0.453668437 | 0.002519053 | CD8.T_CST3_AIF1 |
| EZH2     | 0.283947043 | 0.002646718 | CD8.T_CST3_AIF1 |
| DYNC1H1  | 0.463187924 | 0.002928121 | CD8.T_CST3_AIF1 |
| TRIM28   | 0.340597801 | 0.002992082 | CD8.T_CST3_AIF1 |
| WIP1     | 0.27067565  | 0.003769987 | CD8.T_CST3_AIF1 |
| CHCHD10  | 0.435328424 | 0.003830505 | CD8.T_CST3_AIF1 |
| RAB7A    | 0.376062399 | 0.004408617 | CD8.T_CST3_AIF1 |
| ME2      | 0.271845047 | 0.004412315 | CD8.T_CST3_AIF1 |
| LSM3     | 0.379509026 | 0.004443986 | CD8.T_CST3_AIF1 |
| CPEB4    | 0.29720105  | 0.005078599 | CD8.T_CST3_AIF1 |
| PPP4C    | 0.363440196 | 0.005169897 | CD8.T_CST3_AIF1 |
| ATP5PF   | 0.405692445 | 0.005420383 | CD8.T_CST3_AIF1 |
| HMGN3    | 0.416948156 | 0.005815961 | CD8.T_CST3_AIF1 |
| SCAMP2   | 0.32111459  | 0.005897874 | CD8.T_CST3_AIF1 |
| ATP5PB   | 0.417380836 | 0.006223469 | CD8.T_CST3_AIF1 |
| COX5B    | 0.408372115 | 0.006409444 | CD8.T_CST3_AIF1 |
| PARVG    | 0.338901702 | 0.008277583 | CD8.T_CST3_AIF1 |
| DNMT1    | 0.404457791 | 0.008340311 | CD8.T_CST3_AIF1 |
| BLOC1S6  | 0.326639489 | 0.008438314 | CD8.T_CST3_AIF1 |
| RNF13    | 0.251751829 | 0.009168688 | CD8.T_CST3_AIF1 |
| PRDX1    | 0.370102083 | 0.009480199 | CD8.T_CST3_AIF1 |

**b. Cyto\_CD8.T\_GZMB\_GNLY\_TMPO**

| Gene symbol | avg_log2FC  | p_val_adj | Upregulated group         | Description                                       | pvalue   |
|-------------|-------------|-----------|---------------------------|---------------------------------------------------|----------|
| TYMS        | 2.520274725 | 0         | Cyto_CD8.T_GZMB_GNLY_TMPO | Spliceosome                                       | 1.38E-34 |
| MKI67       | 2.498314696 | 0         | Cyto_CD8.T_GZMB_GNLY_TMPO | Cell cycle                                        | 9.15E-33 |
| HIST1H1B    | 2.187326678 | 0         | Cyto_CD8.T_GZMB_GNLY_TMPO | Parkinson disease                                 | 2.70E-31 |
| RRM2        | 2.0069173   | 0         | Cyto_CD8.T_GZMB_GNLY_TMPO | Amyotrophic lateral sclerosis                     | 3.86E-26 |
| CENPF       | 1.994304779 | 0         | Cyto_CD8.T_GZMB_GNLY_TMPO | Prion disease                                     | 9.48E-26 |
| PCCLAF      | 1.964005813 | 0         | Cyto_CD8.T_GZMB_GNLY_TMPO | Huntington disease                                | 2.76E-25 |
| TOP2A       | 1.937509226 | 0         | Cyto_CD8.T_GZMB_GNLY_TMPO | Proteasome                                        | 1.52E-24 |
| ASPM        | 1.866521264 | 0         | Cyto_CD8.T_GZMB_GNLY_TMPO | DNA replication                                   | 3.33E-20 |
| UBE2C       | 1.714117255 | 0         | Cyto_CD8.T_GZMB_GNLY_TMPO | Alzheimer disease                                 | 4.62E-17 |
| TPX2        | 1.547861003 | 0         | Cyto_CD8.T_GZMB_GNLY_TMPO | Oxidative phosphorylation                         | 1.67E-15 |
| CLSPN       | 1.423236775 | 0         | Cyto_CD8.T_GZMB_GNLY_TMPO | Pathways of neurodegeneration - multiple diseases | 2.56E-15 |
| CENPM       | 1.405178029 | 0         | Cyto_CD8.T_GZMB_GNLY_TMPO | Thermogenesis                                     | 5.28E-15 |
| BIRC5       | 1.265200474 | 0         | Cyto_CD8.T_GZMB_GNLY_TMPO | Diabetic cardiomyopathy                           | 6.98E-15 |

|          |             |           |                           |                                                   |             |
|----------|-------------|-----------|---------------------------|---------------------------------------------------|-------------|
| CDK1     | 1.188447491 | 0         | Cyto_CD8.T_GZMB_GNLY_TMPO | Mismatch repair                                   | 1.75E-11    |
| TK1      | 1.177084447 | 0         | Cyto_CD8.T_GZMB_GNLY_TMPO | Nucleocytoplasmic transport                       | 6.80E-11    |
| CENPE    | 1.161083394 | 0         | Cyto_CD8.T_GZMB_GNLY_TMPO | Chemical carcinogenesis - reactive oxygen species | 2.55E-10    |
| PRC1     | 1.143368318 | 0         | Cyto_CD8.T_GZMB_GNLY_TMPO | Homologous recombination                          | 3.58E-10    |
| KNL1     | 1.130326954 | 0         | Cyto_CD8.T_GZMB_GNLY_TMPO | Oocyte meiosis                                    | 4.83E-10    |
| GTSE1    | 1.075018978 | 0         | Cyto_CD8.T_GZMB_GNLY_TMPO | Spinocerebellar ataxia                            | 4.78E-09    |
| CDKN3    | 1.056515698 | 0         | Cyto_CD8.T_GZMB_GNLY_TMPO | Fanconi anemia pathway                            | 6.96E-09    |
| ZWINT    | 1.039559578 | 0         | Cyto_CD8.T_GZMB_GNLY_TMPO | Nucleotide excision repair                        | 3.44E-08    |
| UBE2T    | 1.029346629 | 0         | Cyto_CD8.T_GZMB_GNLY_TMPO | Cellular senescence                               | 4.20E-08    |
| CENPW    | 0.953928343 | 0         | Cyto_CD8.T_GZMB_GNLY_TMPO | Non-alcoholic fatty liver disease                 | 1.29E-07    |
| NUF2     | 0.950392324 | 0         | Cyto_CD8.T_GZMB_GNLY_TMPO | Epstein-Barr virus infection                      | 6.24E-07    |
| RAD51AP1 | 0.909580645 | 0         | Cyto_CD8.T_GZMB_GNLY_TMPO | Human T-cell leukemia virus 1 infection           | 7.40E-07    |
| CDT1     | 0.908346342 | 0         | Cyto_CD8.T_GZMB_GNLY_TMPO | p53 signaling pathway                             | 2.30E-05    |
| KIF11    | 0.884666981 | 0         | Cyto_CD8.T_GZMB_GNLY_TMPO | Pancreatic cancer                                 | 3.91E-05    |
| SPC25    | 0.879226175 | 0         | Cyto_CD8.T_GZMB_GNLY_TMPO | Progesterone-mediated oocyte maturation           | 0.000151055 |
| NCAPG    | 0.842924945 | 0         | Cyto_CD8.T_GZMB_GNLY_TMPO | Bacterial invasion of epithelial cells            | 0.000171591 |
| MYBL2    | 0.83766593  | 0         | Cyto_CD8.T_GZMB_GNLY_TMPO | mRNA surveillance pathway                         | 0.00024961  |
| PKMYT1   | 0.836285757 | 0         | Cyto_CD8.T_GZMB_GNLY_TMPO | Base excision repair                              | 0.000253971 |
| AURKB    | 0.835458286 | 0         | Cyto_CD8.T_GZMB_GNLY_TMPO | Viral carcinogenesis                              | 0.00060403  |
| KIF23    | 0.830811441 | 0         | Cyto_CD8.T_GZMB_GNLY_TMPO | RNA degradation                                   | 0.00076866  |
| HIST1H3B | 0.80471624  | 0         | Cyto_CD8.T_GZMB_GNLY_TMPO | Platinum drug resistance                          | 0.001120036 |
| KIF15    | 0.781347651 | 0         | Cyto_CD8.T_GZMB_GNLY_TMPO | Bladder cancer                                    | 0.00141655  |
| DLGAP5   | 0.769309519 | 0         | Cyto_CD8.T_GZMB_GNLY_TMPO | Glioma                                            | 0.001450854 |
| CCNA2    | 0.740777857 | 0         | Cyto_CD8.T_GZMB_GNLY_TMPO | Cardiac muscle contraction                        | 0.002024497 |
| CDCA5    | 0.700371754 | 0         | Cyto_CD8.T_GZMB_GNLY_TMPO | Hepatocellular carcinoma                          | 0.002161096 |
| CEP55    | 0.696852206 | 0         | Cyto_CD8.T_GZMB_GNLY_TMPO | Shigellosis                                       | 0.002585985 |
| CDCA3    | 0.693589753 | 0         | Cyto_CD8.T_GZMB_GNLY_TMPO | Small cell lung cancer                            | 0.003451007 |
| KIF2C    | 0.67507169  | 0         | Cyto_CD8.T_GZMB_GNLY_TMPO | Retrograde endocannabinoid signaling              | 0.005245795 |
| ESCO2    | 0.637750701 | 0         | Cyto_CD8.T_GZMB_GNLY_TMPO | Non-small cell lung cancer                        | 0.008785586 |
| MND1     | 0.62866277  | 0         | Cyto_CD8.T_GZMB_GNLY_TMPO | Human immunodeficiency virus 1 infection          | 0.009116397 |
| CKAP2L   | 0.615745872 | 0         | Cyto_CD8.T_GZMB_GNLY_TMPO | Non-homologous end-joining                        | 0.009183865 |
| PBK      | 0.57139494  | 0         | Cyto_CD8.T_GZMB_GNLY_TMPO | One carbon pool by folate                         | 0.009359818 |
| CDCA2    | 0.552082847 | 0         | Cyto_CD8.T_GZMB_GNLY_TMPO | Regulation of actin cytoskeleton                  | 0.01264212  |
| BUB1B    | 0.51151866  | 0         | Cyto_CD8.T_GZMB_GNLY_TMPO | Fluid shear stress and atherosclerosis            | 0.012789652 |
| SPC24    | 0.479432585 | 0         | Cyto_CD8.T_GZMB_GNLY_TMPO | Colorectal cancer                                 | 0.01290509  |
| HIST1H3G | 0.415678967 | 0         | Cyto_CD8.T_GZMB_GNLY_TMPO | Chronic myeloid leukemia                          | 0.013043219 |
| NUSAP1   | 2.214689599 | 3.67E-301 | Cyto_CD8.T_GZMB_GNLY_TMPO | Pathogenic Escherichia coli infection             | 0.014173352 |
| MCM10    | 0.46517477  | 2.94E-300 | Cyto_CD8.T_GZMB_GNLY_TMPO | Ubiquitin mediated proteolysis                    | 0.015586723 |
| FAM111B  | 0.584073672 | 1.17E-294 | Cyto_CD8.T_GZMB_GNLY_TMPO | Protein export                                    | 0.017168267 |
| ORC6     | 0.871846577 | 3.15E-294 | Cyto_CD8.T_GZMB_GNLY_TMPO | Human cytomegalovirus infection                   | 0.018057756 |
| MAD2L1   | 0.959573493 | 2.89E-293 | Cyto_CD8.T_GZMB_GNLY_TMPO | Tight junction                                    | 0.020320463 |
| CDCA8    | 0.684093324 | 1.77E-288 | Cyto_CD8.T_GZMB_GNLY_TMPO | Adherens junction                                 | 0.020890871 |
| FOXM1    | 0.583518736 | 1.12E-287 | Cyto_CD8.T_GZMB_GNLY_TMPO | Melanoma                                          | 0.022843336 |
| MELK     | 0.504957107 | 1.62E-286 | Cyto_CD8.T_GZMB_GNLY_TMPO | Hepatitis B                                       | 0.026115303 |
| UHRF1    | 0.581162636 | 9.24E-285 | Cyto_CD8.T_GZMB_GNLY_TMPO | Biosynthesis of amino acids                       | 0.029489935 |
| HJURP    | 0.447262463 | 1.54E-284 | Cyto_CD8.T_GZMB_GNLY_TMPO | Fatty acid elongation                             | 0.03296696  |
| KIF4A    | 0.510963457 | 1.81E-282 | Cyto_CD8.T_GZMB_GNLY_TMPO | Thyroid cancer                                    | 0.036681107 |
| CCNB2    | 0.690366205 | 3.49E-278 | Cyto_CD8.T_GZMB_GNLY_TMPO | Apoptosis                                         | 0.042219687 |
| ASF1B    | 0.691077569 | 3.08E-274 | Cyto_CD8.T_GZMB_GNLY_TMPO | Drug metabolism - other enzymes                   | 0.043428132 |
| CENPA    | 0.524804033 | 2.89E-273 | Cyto_CD8.T_GZMB_GNLY_TMPO | Yersinia infection                                | 0.044581983 |
| KIF14    | 0.511102238 | 4.22E-270 | Cyto_CD8.T_GZMB_GNLY_TMPO | Glyoxylate and dicarboxylate metabolism           | 0.049306313 |
| SKA1     | 0.418306884 | 1.21E-268 | Cyto_CD8.T_GZMB_GNLY_TMPO |                                                   |             |
| NCAPH    | 0.626710318 | 3.32E-263 | Cyto_CD8.T_GZMB_GNLY_TMPO |                                                   |             |
| HMMR     | 0.791014735 | 1.11E-260 | Cyto_CD8.T_GZMB_GNLY_TMPO |                                                   |             |
| FANCI    | 0.756535538 | 1.16E-256 | Cyto_CD8.T_GZMB_GNLY_TMPO |                                                   |             |
| CCDC34   | 0.848336047 | 1.95E-256 | Cyto_CD8.T_GZMB_GNLY_TMPO |                                                   |             |
| E2F8     | 0.372053772 | 1.21E-241 | Cyto_CD8.T_GZMB_GNLY_TMPO |                                                   |             |
| KIFC1    | 0.756175224 | 5.92E-240 | Cyto_CD8.T_GZMB_GNLY_TMPO |                                                   |             |
| SHCBP1   | 0.495995345 | 4.66E-236 | Cyto_CD8.T_GZMB_GNLY_TMPO |                                                   |             |
| POC1A    | 0.466826018 | 6.90E-234 | Cyto_CD8.T_GZMB_GNLY_TMPO |                                                   |             |
| CENPU    | 0.663508042 | 5.38E-233 | Cyto_CD8.T_GZMB_GNLY_TMPO |                                                   |             |
| DEPDC1B  | 0.496272947 | 1.43E-230 | Cyto_CD8.T_GZMB_GNLY_TMPO |                                                   |             |
| CKS1B    | 1.737264188 | 2.72E-226 | Cyto_CD8.T_GZMB_GNLY_TMPO |                                                   |             |
| NCAPG2   | 0.554461054 | 9.96E-222 | Cyto_CD8.T_GZMB_GNLY_TMPO |                                                   |             |

|           |             |           |                           |
|-----------|-------------|-----------|---------------------------|
| ECT2      | 0.553357549 | 2.57E-221 | Cyto_CD8.T_GZMB_GNLY_TMPO |
| DHFR      | 0.894437096 | 2.45E-220 | Cyto_CD8.T_GZMB_GNLY_TMPO |
| SMC2      | 1.361839217 | 6.72E-220 | Cyto_CD8.T_GZMB_GNLY_TMPO |
| SGO1      | 0.611667746 | 3.31E-219 | Cyto_CD8.T_GZMB_GNLY_TMPO |
| HIST1H2AJ | 0.46113419  | 2.51E-217 | Cyto_CD8.T_GZMB_GNLY_TMPO |
| CDC6      | 0.446287622 | 8.39E-217 | Cyto_CD8.T_GZMB_GNLY_TMPO |
| ANLN      | 0.449979295 | 6.74E-211 | Cyto_CD8.T_GZMB_GNLY_TMPO |
| TROAP     | 0.494713403 | 1.54E-209 | Cyto_CD8.T_GZMB_GNLY_TMPO |
| FBXO43    | 0.32224929  | 2.14E-209 | Cyto_CD8.T_GZMB_GNLY_TMPO |
| TTK       | 0.376318289 | 2.81E-207 | Cyto_CD8.T_GZMB_GNLY_TMPO |
| TCF19     | 0.533691987 | 2.92E-207 | Cyto_CD8.T_GZMB_GNLY_TMPO |
| ATAD5     | 0.758293298 | 2.61E-206 | Cyto_CD8.T_GZMB_GNLY_TMPO |
| NDC80     | 0.660741913 | 1.76E-203 | Cyto_CD8.T_GZMB_GNLY_TMPO |
| CHEK1     | 0.745507051 | 9.81E-203 | Cyto_CD8.T_GZMB_GNLY_TMPO |
| SKA3      | 0.359639548 | 5.14E-196 | Cyto_CD8.T_GZMB_GNLY_TMPO |
| SAC3D1    | 0.72970269  | 9.31E-196 | Cyto_CD8.T_GZMB_GNLY_TMPO |
| DIAPH3    | 0.458770825 | 1.81E-194 | Cyto_CD8.T_GZMB_GNLY_TMPO |
| HIST1H2AL | 0.619823932 | 9.94E-188 | Cyto_CD8.T_GZMB_GNLY_TMPO |
| NCAPD2    | 0.66268062  | 1.64E-187 | Cyto_CD8.T_GZMB_GNLY_TMPO |
| DTL       | 0.381659686 | 8.25E-187 | Cyto_CD8.T_GZMB_GNLY_TMPO |
| POLQ      | 0.286993207 | 1.06E-184 | Cyto_CD8.T_GZMB_GNLY_TMPO |
| TACC3     | 0.816115878 | 1.19E-184 | Cyto_CD8.T_GZMB_GNLY_TMPO |
| STIL      | 0.403817501 | 2.82E-183 | Cyto_CD8.T_GZMB_GNLY_TMPO |
| SGO2      | 0.768757767 | 1.37E-179 | Cyto_CD8.T_GZMB_GNLY_TMPO |
| MXD3      | 0.439620684 | 4.12E-177 | Cyto_CD8.T_GZMB_GNLY_TMPO |
| CENPK     | 1.111977833 | 3.51E-176 | Cyto_CD8.T_GZMB_GNLY_TMPO |
| RACGAP1   | 0.597860638 | 1.49E-174 | Cyto_CD8.T_GZMB_GNLY_TMPO |
| FBXO5     | 0.739812786 | 5.22E-173 | Cyto_CD8.T_GZMB_GNLY_TMPO |
| DTYMK     | 0.972018727 | 9.66E-171 | Cyto_CD8.T_GZMB_GNLY_TMPO |
| BRCA2     | 0.508500703 | 2.23E-167 | Cyto_CD8.T_GZMB_GNLY_TMPO |
| ATAD2     | 1.738960412 | 3.42E-164 | Cyto_CD8.T_GZMB_GNLY_TMPO |
| WDR34     | 0.455615995 | 5.64E-153 | Cyto_CD8.T_GZMB_GNLY_TMPO |
| GINS2     | 0.52861714  | 1.47E-152 | Cyto_CD8.T_GZMB_GNLY_TMPO |
| FEN1      | 0.665373975 | 2.37E-152 | Cyto_CD8.T_GZMB_GNLY_TMPO |
| CENPN     | 0.672995572 | 1.95E-151 | Cyto_CD8.T_GZMB_GNLY_TMPO |
| CIP2A     | 0.495366602 | 2.56E-151 | Cyto_CD8.T_GZMB_GNLY_TMPO |
| E2F1      | 0.501488973 | 3.41E-151 | Cyto_CD8.T_GZMB_GNLY_TMPO |
| BRCA1     | 0.504646907 | 4.73E-149 | Cyto_CD8.T_GZMB_GNLY_TMPO |
| C21orf58  | 0.483145513 | 5.29E-149 | Cyto_CD8.T_GZMB_GNLY_TMPO |
| BUB1      | 0.356713329 | 1.05E-146 | Cyto_CD8.T_GZMB_GNLY_TMPO |
| PSMC3IP   | 0.377212068 | 5.07E-145 | Cyto_CD8.T_GZMB_GNLY_TMPO |
| ESPL1     | 0.267363613 | 4.16E-140 | Cyto_CD8.T_GZMB_GNLY_TMPO |
| E2F2      | 0.275877451 | 2.70E-138 | Cyto_CD8.T_GZMB_GNLY_TMPO |
| GMNN      | 0.906678257 | 8.25E-138 | Cyto_CD8.T_GZMB_GNLY_TMPO |
| RAD51     | 0.370888598 | 4.06E-136 | Cyto_CD8.T_GZMB_GNLY_TMPO |
| HIST1H2AH | 0.443055231 | 2.46E-134 | Cyto_CD8.T_GZMB_GNLY_TMPO |
| SMC4      | 1.888353184 | 3.95E-134 | Cyto_CD8.T_GZMB_GNLY_TMPO |
| CDC20     | 0.530512519 | 6.91E-134 | Cyto_CD8.T_GZMB_GNLY_TMPO |
| WDR62     | 0.282660996 | 2.38E-128 | Cyto_CD8.T_GZMB_GNLY_TMPO |
| NCAPD3    | 0.857707399 | 3.59E-128 | Cyto_CD8.T_GZMB_GNLY_TMPO |
| KIF22     | 0.982965601 | 3.96E-128 | Cyto_CD8.T_GZMB_GNLY_TMPO |
| NSD2      | 0.655164067 | 2.25E-126 | Cyto_CD8.T_GZMB_GNLY_TMPO |
| HIST1H2AM | 0.259773332 | 5.70E-126 | Cyto_CD8.T_GZMB_GNLY_TMPO |
| HMGB3     | 0.51211681  | 1.80E-123 | Cyto_CD8.T_GZMB_GNLY_TMPO |
| RRM1      | 0.888080949 | 1.22E-121 | Cyto_CD8.T_GZMB_GNLY_TMPO |
| PCNA      | 1.663933399 | 1.11E-120 | Cyto_CD8.T_GZMB_GNLY_TMPO |
| NRM       | 0.594341903 | 2.13E-120 | Cyto_CD8.T_GZMB_GNLY_TMPO |
| STMN1     | 3.339168453 | 4.21E-119 | Cyto_CD8.T_GZMB_GNLY_TMPO |
| TTF2      | 0.588361891 | 2.03E-116 | Cyto_CD8.T_GZMB_GNLY_TMPO |
| CIT       | 0.32938049  | 3.79E-114 | Cyto_CD8.T_GZMB_GNLY_TMPO |
| CDC45     | 0.335391892 | 5.13E-114 | Cyto_CD8.T_GZMB_GNLY_TMPO |
| KIF18B    | 0.259213769 | 2.27E-113 | Cyto_CD8.T_GZMB_GNLY_TMPO |
| HELLS     | 0.944159403 | 9.89E-112 | Cyto_CD8.T_GZMB_GNLY_TMPO |
| CKAP5     | 0.672911785 | 2.73E-111 | Cyto_CD8.T_GZMB_GNLY_TMPO |

|           |             |           |                           |
|-----------|-------------|-----------|---------------------------|
| PIMREG    | 0.28953262  | 3.76E-110 | Cyto_CD8.T_GZMB_GNLY_TMPO |
| EZH2      | 1.212553163 | 8.01E-110 | Cyto_CD8.T_GZMB_GNLY_TMPO |
| KIF20B    | 0.834955114 | 1.68E-109 | Cyto_CD8.T_GZMB_GNLY_TMPO |
| HIST1H1D  | 1.513427021 | 1.38E-107 | Cyto_CD8.T_GZMB_GNLY_TMPO |
| HIST1H2AI | 0.280290779 | 3.99E-107 | Cyto_CD8.T_GZMB_GNLY_TMPO |
| DNAJC9    | 1.033116472 | 4.22E-107 | Cyto_CD8.T_GZMB_GNLY_TMPO |
| ACOT7     | 0.596523625 | 1.47E-105 | Cyto_CD8.T_GZMB_GNLY_TMPO |
| HIST1H2AG | 0.798647339 | 2.67E-105 | Cyto_CD8.T_GZMB_GNLY_TMPO |
| BRIP1     | 0.28070877  | 3.15E-105 | Cyto_CD8.T_GZMB_GNLY_TMPO |
| CHAF1A    | 0.528949202 | 5.42E-105 | Cyto_CD8.T_GZMB_GNLY_TMPO |
| TMEM106C  | 1.061395956 | 5.17E-104 | Cyto_CD8.T_GZMB_GNLY_TMPO |
| HIRIP3    | 0.637157821 | 1.81E-101 | Cyto_CD8.T_GZMB_GNLY_TMPO |
| PLK1      | 0.320234569 | 4.72E-100 | Cyto_CD8.T_GZMB_GNLY_TMPO |
| TUBB      | 2.703133586 | 2.36E-99  | Cyto_CD8.T_GZMB_GNLY_TMPO |
| MCM3      | 1.008380999 | 1.53E-98  | Cyto_CD8.T_GZMB_GNLY_TMPO |
| CENPH     | 0.501422498 | 1.79E-98  | Cyto_CD8.T_GZMB_GNLY_TMPO |
| HMGB2     | 2.913751459 | 3.97E-98  | Cyto_CD8.T_GZMB_GNLY_TMPO |
| LIG1      | 0.576254917 | 8.69E-98  | Cyto_CD8.T_GZMB_GNLY_TMPO |
| PARPBP    | 0.291768181 | 1.64E-97  | Cyto_CD8.T_GZMB_GNLY_TMPO |
| DDX11     | 0.34575803  | 3.30E-97  | Cyto_CD8.T_GZMB_GNLY_TMPO |
| SKA2      | 0.867414707 | 1.50E-95  | Cyto_CD8.T_GZMB_GNLY_TMPO |
| SPAG5     | 0.295657598 | 1.19E-94  | Cyto_CD8.T_GZMB_GNLY_TMPO |
| TMPO      | 1.648395627 | 3.62E-94  | Cyto_CD8.T_GZMB_GNLY_TMPO |
| KIF18A    | 0.307209476 | 2.14E-93  | Cyto_CD8.T_GZMB_GNLY_TMPO |
| HIST1H1C  | 1.613643025 | 3.57E-93  | Cyto_CD8.T_GZMB_GNLY_TMPO |
| HMG2      | 2.304999109 | 1.65E-91  | Cyto_CD8.T_GZMB_GNLY_TMPO |
| GGH       | 0.476680524 | 2.50E-91  | Cyto_CD8.T_GZMB_GNLY_TMPO |
| MCM4      | 0.51879264  | 2.59E-89  | Cyto_CD8.T_GZMB_GNLY_TMPO |
| CARHSP1   | 1.135246363 | 7.00E-89  | Cyto_CD8.T_GZMB_GNLY_TMPO |
| HIST1H3D  | 1.029504652 | 1.52E-88  | Cyto_CD8.T_GZMB_GNLY_TMPO |
| CCNB1     | 0.390226694 | 3.97E-88  | Cyto_CD8.T_GZMB_GNLY_TMPO |
| TUBG1     | 0.369698444 | 3.24E-87  | Cyto_CD8.T_GZMB_GNLY_TMPO |
| NUDT1     | 0.991915843 | 6.40E-87  | Cyto_CD8.T_GZMB_GNLY_TMPO |
| TUBA1B    | 3.006611955 | 1.84E-86  | Cyto_CD8.T_GZMB_GNLY_TMPO |
| NEK2      | 0.27792445  | 1.81E-85  | Cyto_CD8.T_GZMB_GNLY_TMPO |
| SAE1      | 0.705935311 | 2.19E-85  | Cyto_CD8.T_GZMB_GNLY_TMPO |
| ITGB3BP   | 0.579841847 | 1.04E-84  | Cyto_CD8.T_GZMB_GNLY_TMPO |
| HIST1H4C  | 3.740411895 | 1.13E-84  | Cyto_CD8.T_GZMB_GNLY_TMPO |
| MCM7      | 1.078407178 | 4.02E-84  | Cyto_CD8.T_GZMB_GNLY_TMPO |
| LRR1      | 0.525393317 | 2.52E-82  | Cyto_CD8.T_GZMB_GNLY_TMPO |
| SPDL1     | 0.332518643 | 6.78E-82  | Cyto_CD8.T_GZMB_GNLY_TMPO |
| BARD1     | 0.64490135  | 8.11E-82  | Cyto_CD8.T_GZMB_GNLY_TMPO |
| LMNB2     | 0.59835026  | 1.36E-81  | Cyto_CD8.T_GZMB_GNLY_TMPO |
| CDCA7     | 0.343825232 | 4.06E-81  | Cyto_CD8.T_GZMB_GNLY_TMPO |
| HMGB1     | 2.058984542 | 4.67E-81  | Cyto_CD8.T_GZMB_GNLY_TMPO |
| CEP152    | 0.47747148  | 5.05E-81  | Cyto_CD8.T_GZMB_GNLY_TMPO |
| H2AFV     | 1.795638435 | 8.63E-81  | Cyto_CD8.T_GZMB_GNLY_TMPO |
| ASRGL1    | 0.322861548 | 2.10E-77  | Cyto_CD8.T_GZMB_GNLY_TMPO |
| FANCD2    | 0.332518643 | 3.05E-77  | Cyto_CD8.T_GZMB_GNLY_TMPO |
| CBX5      | 0.851122581 | 6.15E-77  | Cyto_CD8.T_GZMB_GNLY_TMPO |
| H2AFZ     | 1.832026894 | 2.05E-76  | Cyto_CD8.T_GZMB_GNLY_TMPO |
| CTNNA1    | 0.447447973 | 7.34E-76  | Cyto_CD8.T_GZMB_GNLY_TMPO |
| DEK       | 1.679687232 | 3.94E-75  | Cyto_CD8.T_GZMB_GNLY_TMPO |
| RFC3      | 0.347230512 | 4.84E-75  | Cyto_CD8.T_GZMB_GNLY_TMPO |
| RFC4      | 0.501290186 | 1.94E-74  | Cyto_CD8.T_GZMB_GNLY_TMPO |
| SMC3      | 1.323915316 | 2.66E-73  | Cyto_CD8.T_GZMB_GNLY_TMPO |
| ANP32B    | 1.57786417  | 3.74E-72  | Cyto_CD8.T_GZMB_GNLY_TMPO |
| PHF19     | 0.912303018 | 4.43E-72  | Cyto_CD8.T_GZMB_GNLY_TMPO |
| YEATS4    | 0.685659948 | 8.99E-72  | Cyto_CD8.T_GZMB_GNLY_TMPO |
| DUT       | 1.708623107 | 9.66E-72  | Cyto_CD8.T_GZMB_GNLY_TMPO |
| TIMELESS  | 0.293151873 | 2.31E-71  | Cyto_CD8.T_GZMB_GNLY_TMPO |
| RPA3      | 0.941631422 | 3.45E-71  | Cyto_CD8.T_GZMB_GNLY_TMPO |
| H2AFX     | 1.04965525  | 1.51E-70  | Cyto_CD8.T_GZMB_GNLY_TMPO |
| HIST2H2AB | 0.341206285 | 1.61E-70  | Cyto_CD8.T_GZMB_GNLY_TMPO |

|           |             |          |                           |
|-----------|-------------|----------|---------------------------|
| DNMT1     | 1.219186629 | 7.72E-70 | Cyto_CD8.T_GZMB_GNLY_TMPO |
| PSIP1     | 1.156228383 | 7.83E-70 | Cyto_CD8.T_GZMB_GNLY_TMPO |
| HIST2H2AC | 0.966696695 | 9.22E-70 | Cyto_CD8.T_GZMB_GNLY_TMPO |
| RPL39L    | 0.571767526 | 1.31E-69 | Cyto_CD8.T_GZMB_GNLY_TMPO |
| SMC1A     | 1.061419148 | 2.14E-69 | Cyto_CD8.T_GZMB_GNLY_TMPO |
| INCENP    | 0.311534426 | 4.86E-69 | Cyto_CD8.T_GZMB_GNLY_TMPO |
| SNRPD1    | 0.97330581  | 8.52E-69 | Cyto_CD8.T_GZMB_GNLY_TMPO |
| CENPS     | 0.346909735 | 1.55E-68 | Cyto_CD8.T_GZMB_GNLY_TMPO |
| PTTG1     | 1.320141184 | 2.62E-67 | Cyto_CD8.T_GZMB_GNLY_TMPO |
| TEDC1     | 0.41994165  | 3.16E-67 | Cyto_CD8.T_GZMB_GNLY_TMPO |
| FANCG     | 0.269880176 | 5.26E-66 | Cyto_CD8.T_GZMB_GNLY_TMPO |
| ARHGAP19  | 0.471398856 | 1.96E-65 | Cyto_CD8.T_GZMB_GNLY_TMPO |
| ARHGAP11A | 0.338179747 | 3.72E-65 | Cyto_CD8.T_GZMB_GNLY_TMPO |
| DDX39A    | 0.926271161 | 7.17E-65 | Cyto_CD8.T_GZMB_GNLY_TMPO |
| HIST1H2BH | 0.468508535 | 1.09E-63 | Cyto_CD8.T_GZMB_GNLY_TMPO |
| NUCB2     | 1.455515    | 6.93E-63 | Cyto_CD8.T_GZMB_GNLY_TMPO |
| ZGRF1     | 0.275664446 | 8.86E-63 | Cyto_CD8.T_GZMB_GNLY_TMPO |
| LSM4      | 0.94070424  | 9.61E-63 | Cyto_CD8.T_GZMB_GNLY_TMPO |
| HIST1H1E  | 1.046115853 | 6.17E-62 | Cyto_CD8.T_GZMB_GNLY_TMPO |
| PTMA      | 1.082223982 | 2.07E-61 | Cyto_CD8.T_GZMB_GNLY_TMPO |
| SIVA1     | 1.133886204 | 4.22E-61 | Cyto_CD8.T_GZMB_GNLY_TMPO |
| HAUS8     | 0.324828645 | 3.17E-60 | Cyto_CD8.T_GZMB_GNLY_TMPO |
| COX8A     | 1.220146086 | 5.23E-60 | Cyto_CD8.T_GZMB_GNLY_TMPO |
| USP1      | 0.970230316 | 1.79E-59 | Cyto_CD8.T_GZMB_GNLY_TMPO |
| C9orf40   | 0.405286545 | 2.30E-59 | Cyto_CD8.T_GZMB_GNLY_TMPO |
| NUCKS1    | 1.342223483 | 4.13E-59 | Cyto_CD8.T_GZMB_GNLY_TMPO |
| ANP32E    | 1.253065015 | 1.35E-58 | Cyto_CD8.T_GZMB_GNLY_TMPO |
| H3F3A     | 0.922252246 | 1.50E-58 | Cyto_CD8.T_GZMB_GNLY_TMPO |
| MZT1      | 0.678167994 | 2.77E-58 | Cyto_CD8.T_GZMB_GNLY_TMPO |
| RFC5      | 0.295619285 | 6.73E-58 | Cyto_CD8.T_GZMB_GNLY_TMPO |
| HADH      | 0.492190652 | 1.36E-57 | Cyto_CD8.T_GZMB_GNLY_TMPO |
| ACYP1     | 0.532478585 | 6.06E-57 | Cyto_CD8.T_GZMB_GNLY_TMPO |
| CEP57L1   | 0.385062558 | 6.55E-57 | Cyto_CD8.T_GZMB_GNLY_TMPO |
| MASTL     | 0.606075493 | 1.18E-56 | Cyto_CD8.T_GZMB_GNLY_TMPO |
| LMNB1     | 0.769151513 | 1.64E-55 | Cyto_CD8.T_GZMB_GNLY_TMPO |
| WDR76     | 0.44949607  | 3.26E-55 | Cyto_CD8.T_GZMB_GNLY_TMPO |
| POLD3     | 0.394237227 | 2.21E-54 | Cyto_CD8.T_GZMB_GNLY_TMPO |
| UBE2S     | 1.264259535 | 2.91E-54 | Cyto_CD8.T_GZMB_GNLY_TMPO |
| CALM3     | 1.112976617 | 1.42E-53 | Cyto_CD8.T_GZMB_GNLY_TMPO |
| CDKN2D    | 1.281057188 | 2.33E-53 | Cyto_CD8.T_GZMB_GNLY_TMPO |
| C19orf48  | 0.390443198 | 2.40E-53 | Cyto_CD8.T_GZMB_GNLY_TMPO |
| H2AFY     | 0.896600828 | 3.17E-53 | Cyto_CD8.T_GZMB_GNLY_TMPO |
| BANF1     | 0.966620214 | 7.68E-52 | Cyto_CD8.T_GZMB_GNLY_TMPO |
| FAM111A   | 0.782277735 | 8.00E-52 | Cyto_CD8.T_GZMB_GNLY_TMPO |
| RBBP8     | 0.66862034  | 8.48E-52 | Cyto_CD8.T_GZMB_GNLY_TMPO |
| MCM8      | 0.289292554 | 9.84E-52 | Cyto_CD8.T_GZMB_GNLY_TMPO |
| RANBP1    | 1.058487096 | 1.14E-51 | Cyto_CD8.T_GZMB_GNLY_TMPO |
| MCM2      | 0.272355827 | 1.88E-51 | Cyto_CD8.T_GZMB_GNLY_TMPO |
| FANCA     | 0.405990897 | 5.34E-51 | Cyto_CD8.T_GZMB_GNLY_TMPO |
| MAD2L2    | 0.655516766 | 1.64E-50 | Cyto_CD8.T_GZMB_GNLY_TMPO |
| RAN       | 1.062081136 | 9.49E-50 | Cyto_CD8.T_GZMB_GNLY_TMPO |
| TUBA1C    | 0.804141117 | 6.43E-49 | Cyto_CD8.T_GZMB_GNLY_TMPO |
| NCAPH2    | 0.389492899 | 8.17E-49 | Cyto_CD8.T_GZMB_GNLY_TMPO |
| DONSON    | 0.265461082 | 2.53E-48 | Cyto_CD8.T_GZMB_GNLY_TMPO |
| SSRP1     | 0.614952868 | 1.21E-47 | Cyto_CD8.T_GZMB_GNLY_TMPO |
| BRI3BP    | 0.421085993 | 1.39E-47 | Cyto_CD8.T_GZMB_GNLY_TMPO |
| PPIA      | 0.99849375  | 1.59E-47 | Cyto_CD8.T_GZMB_GNLY_TMPO |
| HAUS1     | 0.413868158 | 2.50E-47 | Cyto_CD8.T_GZMB_GNLY_TMPO |
| MZT2B     | 0.956398633 | 5.79E-47 | Cyto_CD8.T_GZMB_GNLY_TMPO |
| IDH2      | 0.888605355 | 7.16E-47 | Cyto_CD8.T_GZMB_GNLY_TMPO |
| MCM5      | 0.497411127 | 3.56E-46 | Cyto_CD8.T_GZMB_GNLY_TMPO |
| CCDC167   | 0.735838789 | 1.35E-45 | Cyto_CD8.T_GZMB_GNLY_TMPO |
| VRK1      | 0.492635319 | 1.62E-45 | Cyto_CD8.T_GZMB_GNLY_TMPO |
| BCL2L12   | 0.434493231 | 2.32E-45 | Cyto_CD8.T_GZMB_GNLY_TMPO |

|            |             |          |                           |
|------------|-------------|----------|---------------------------|
| MCM6       | 0.457662824 | 7.18E-45 | Cyto_CD8.T_GZMB_GNLY_TMPO |
| MAGOHB     | 0.457165467 | 1.34E-44 | Cyto_CD8.T_GZMB_GNLY_TMPO |
| RAD51C     | 0.431719816 | 1.78E-44 | Cyto_CD8.T_GZMB_GNLY_TMPO |
| MIS18BP1   | 0.83351083  | 4.72E-44 | Cyto_CD8.T_GZMB_GNLY_TMPO |
| CRIP1      | 1.43429196  | 1.01E-43 | Cyto_CD8.T_GZMB_GNLY_TMPO |
| ALYREF     | 0.878384861 | 1.23E-43 | Cyto_CD8.T_GZMB_GNLY_TMPO |
| CCP110     | 0.349868559 | 2.16E-43 | Cyto_CD8.T_GZMB_GNLY_TMPO |
| CDC25B     | 0.540435848 | 3.30E-43 | Cyto_CD8.T_GZMB_GNLY_TMPO |
| IMPA2      | 0.259406845 | 1.15E-42 | Cyto_CD8.T_GZMB_GNLY_TMPO |
| GPSM2      | 0.289037886 | 6.11E-42 | Cyto_CD8.T_GZMB_GNLY_TMPO |
| SUPT16H    | 0.812285499 | 2.92E-41 | Cyto_CD8.T_GZMB_GNLY_TMPO |
| HTATSF1    | 0.554596641 | 3.48E-40 | Cyto_CD8.T_GZMB_GNLY_TMPO |
| HPRT1      | 0.674439986 | 1.24E-39 | Cyto_CD8.T_GZMB_GNLY_TMPO |
| TUBB4B     | 0.994566338 | 1.47E-39 | Cyto_CD8.T_GZMB_GNLY_TMPO |
| DDB2       | 0.522252171 | 2.00E-39 | Cyto_CD8.T_GZMB_GNLY_TMPO |
| CD38       | 0.76205364  | 2.41E-39 | Cyto_CD8.T_GZMB_GNLY_TMPO |
| CDKN2C     | 0.44271441  | 7.52E-39 | Cyto_CD8.T_GZMB_GNLY_TMPO |
| AURKA      | 0.361675648 | 1.81E-38 | Cyto_CD8.T_GZMB_GNLY_TMPO |
| MIS18A     | 0.255704285 | 1.96E-38 | Cyto_CD8.T_GZMB_GNLY_TMPO |
| SUZ12      | 0.735368304 | 2.07E-38 | Cyto_CD8.T_GZMB_GNLY_TMPO |
| SLC25A5    | 0.972860759 | 2.26E-38 | Cyto_CD8.T_GZMB_GNLY_TMPO |
| RAD21      | 0.875189863 | 3.44E-38 | Cyto_CD8.T_GZMB_GNLY_TMPO |
| HNRNPFR    | 0.853045252 | 6.02E-38 | Cyto_CD8.T_GZMB_GNLY_TMPO |
| CDK2       | 0.289466264 | 8.90E-38 | Cyto_CD8.T_GZMB_GNLY_TMPO |
| DCK        | 0.591716545 | 1.04E-37 | Cyto_CD8.T_GZMB_GNLY_TMPO |
| TFDP1      | 0.474434316 | 1.05E-37 | Cyto_CD8.T_GZMB_GNLY_TMPO |
| CFL1       | 0.814594142 | 1.45E-37 | Cyto_CD8.T_GZMB_GNLY_TMPO |
| NGG5       | 0.786617098 | 2.24E-37 | Cyto_CD8.T_GZMB_GNLY_TMPO |
| RFC2       | 0.515365785 | 2.70E-37 | Cyto_CD8.T_GZMB_GNLY_TMPO |
| RALY       | 0.763640486 | 9.23E-37 | Cyto_CD8.T_GZMB_GNLY_TMPO |
| LSM5       | 0.647304669 | 9.54E-37 | Cyto_CD8.T_GZMB_GNLY_TMPO |
| DCTN3      | 0.854438155 | 1.19E-36 | Cyto_CD8.T_GZMB_GNLY_TMPO |
| GIHCG      | 0.371285034 | 2.37E-36 | Cyto_CD8.T_GZMB_GNLY_TMPO |
| EC11       | 0.463512934 | 3.57E-36 | Cyto_CD8.T_GZMB_GNLY_TMPO |
| SNRNP      | 0.841091807 | 4.95E-36 | Cyto_CD8.T_GZMB_GNLY_TMPO |
| AP1M1      | 0.473995196 | 6.95E-36 | Cyto_CD8.T_GZMB_GNLY_TMPO |
| GAPDH      | 1.207273234 | 7.63E-36 | Cyto_CD8.T_GZMB_GNLY_TMPO |
| HNRNPAB    | 0.96859296  | 8.95E-36 | Cyto_CD8.T_GZMB_GNLY_TMPO |
| CENPJ      | 0.267557627 | 1.09E-35 | Cyto_CD8.T_GZMB_GNLY_TMPO |
| HIST1H2BC  | 0.41176088  | 2.61E-35 | Cyto_CD8.T_GZMB_GNLY_TMPO |
| HSPB11     | 0.738285672 | 2.68E-35 | Cyto_CD8.T_GZMB_GNLY_TMPO |
| UBL7-AS1   | 0.269198794 | 3.22E-35 | Cyto_CD8.T_GZMB_GNLY_TMPO |
| CKS2       | 0.781445742 | 5.43E-35 | Cyto_CD8.T_GZMB_GNLY_TMPO |
| NFYB       | 0.42207726  | 5.61E-35 | Cyto_CD8.T_GZMB_GNLY_TMPO |
| TOPBP1     | 0.426586231 | 6.60E-35 | Cyto_CD8.T_GZMB_GNLY_TMPO |
| CBX3       | 0.812522413 | 6.97E-35 | Cyto_CD8.T_GZMB_GNLY_TMPO |
| NONO       | 0.629059933 | 8.03E-35 | Cyto_CD8.T_GZMB_GNLY_TMPO |
| RNASEH2C   | 0.813725819 | 1.01E-34 | Cyto_CD8.T_GZMB_GNLY_TMPO |
| PRPSAP1    | 0.476090755 | 1.57E-34 | Cyto_CD8.T_GZMB_GNLY_TMPO |
| C17orf49   | 0.809169575 | 5.01E-34 | Cyto_CD8.T_GZMB_GNLY_TMPO |
| RNASEH2B   | 0.657580082 | 6.50E-34 | Cyto_CD8.T_GZMB_GNLY_TMPO |
| AL441992.1 | 0.264559677 | 6.64E-34 | Cyto_CD8.T_GZMB_GNLY_TMPO |
| FGFR1OP    | 0.307182091 | 8.16E-34 | Cyto_CD8.T_GZMB_GNLY_TMPO |
| CCNE2      | 0.293546379 | 8.34E-34 | Cyto_CD8.T_GZMB_GNLY_TMPO |
| RHEB       | 0.843566354 | 1.31E-33 | Cyto_CD8.T_GZMB_GNLY_TMPO |
| HIST1H2BN  | 0.496990225 | 1.52E-33 | Cyto_CD8.T_GZMB_GNLY_TMPO |
| HMGXB4     | 0.564977283 | 2.43E-33 | Cyto_CD8.T_GZMB_GNLY_TMPO |
| PPM1G      | 0.730342947 | 2.65E-33 | Cyto_CD8.T_GZMB_GNLY_TMPO |
| DLEU2      | 0.490221943 | 3.06E-33 | Cyto_CD8.T_GZMB_GNLY_TMPO |
| BLM        | 0.290836837 | 3.72E-33 | Cyto_CD8.T_GZMB_GNLY_TMPO |
| CNTRL      | 0.640443314 | 4.32E-33 | Cyto_CD8.T_GZMB_GNLY_TMPO |
| MSH2       | 0.301677921 | 4.62E-33 | Cyto_CD8.T_GZMB_GNLY_TMPO |
| EBP        | 0.581808298 | 6.85E-33 | Cyto_CD8.T_GZMB_GNLY_TMPO |
| ILF2       | 0.776737916 | 9.91E-33 | Cyto_CD8.T_GZMB_GNLY_TMPO |

|          |             |          |                           |
|----------|-------------|----------|---------------------------|
| HIST1H4E | 0.280173163 | 1.39E-32 | Cyto_CD8.T_GZMB_GNLY_TMPO |
| SRSF10   | 0.66407717  | 2.17E-32 | Cyto_CD8.T_GZMB_GNLY_TMPO |
| ATP23    | 0.308835967 | 7.03E-32 | Cyto_CD8.T_GZMB_GNLY_TMPO |
| REEP4    | 0.285028497 | 1.04E-31 | Cyto_CD8.T_GZMB_GNLY_TMPO |
| TEX30    | 0.42519775  | 1.15E-31 | Cyto_CD8.T_GZMB_GNLY_TMPO |
| THRAP3   | 0.725642393 | 1.20E-31 | Cyto_CD8.T_GZMB_GNLY_TMPO |
| SNRPF    | 0.704092849 | 1.20E-31 | Cyto_CD8.T_GZMB_GNLY_TMPO |
| C12orf75 | 0.835034228 | 1.47E-31 | Cyto_CD8.T_GZMB_GNLY_TMPO |
| VDAC3    | 0.658167644 | 1.72E-31 | Cyto_CD8.T_GZMB_GNLY_TMPO |
| HLTF     | 0.482467147 | 1.83E-31 | Cyto_CD8.T_GZMB_GNLY_TMPO |
| YWHAH    | 0.657255838 | 2.62E-31 | Cyto_CD8.T_GZMB_GNLY_TMPO |
| CENPX    | 0.670375943 | 2.90E-31 | Cyto_CD8.T_GZMB_GNLY_TMPO |
| NAP1L1   | 0.791376711 | 3.28E-31 | Cyto_CD8.T_GZMB_GNLY_TMPO |
| HINT2    | 0.573090417 | 5.42E-31 | Cyto_CD8.T_GZMB_GNLY_TMPO |
| JPT1     | 0.875631665 | 7.92E-31 | Cyto_CD8.T_GZMB_GNLY_TMPO |
| IFI16    | 0.871950415 | 1.07E-30 | Cyto_CD8.T_GZMB_GNLY_TMPO |
| PXMP2    | 0.299937072 | 1.34E-30 | Cyto_CD8.T_GZMB_GNLY_TMPO |
| H1FX     | 0.981751716 | 1.76E-30 | Cyto_CD8.T_GZMB_GNLY_TMPO |
| CCDC82   | 0.561299231 | 1.88E-30 | Cyto_CD8.T_GZMB_GNLY_TMPO |
| PSMB9    | 0.77802444  | 3.31E-30 | Cyto_CD8.T_GZMB_GNLY_TMPO |
| HMG1     | 0.798744141 | 7.10E-30 | Cyto_CD8.T_GZMB_GNLY_TMPO |
| RANGAP1  | 0.380773187 | 1.38E-29 | Cyto_CD8.T_GZMB_GNLY_TMPO |
| MICB     | 0.370888598 | 1.43E-29 | Cyto_CD8.T_GZMB_GNLY_TMPO |
| CDCA4    | 0.50613938  | 1.97E-29 | Cyto_CD8.T_GZMB_GNLY_TMPO |
| GMPS     | 0.459763075 | 2.56E-29 | Cyto_CD8.T_GZMB_GNLY_TMPO |
| HNRNPD   | 0.7474873   | 2.64E-29 | Cyto_CD8.T_GZMB_GNLY_TMPO |
| MGME1    | 0.299134311 | 3.02E-29 | Cyto_CD8.T_GZMB_GNLY_TMPO |
| MAZ      | 0.739333056 | 9.69E-29 | Cyto_CD8.T_GZMB_GNLY_TMPO |
| CBFB     | 0.463229895 | 1.84E-28 | Cyto_CD8.T_GZMB_GNLY_TMPO |
| CTCF     | 0.609506861 | 2.02E-28 | Cyto_CD8.T_GZMB_GNLY_TMPO |
| CDKN2A   | 0.48738797  | 2.15E-28 | Cyto_CD8.T_GZMB_GNLY_TMPO |
| LBR      | 0.661369904 | 2.36E-28 | Cyto_CD8.T_GZMB_GNLY_TMPO |
| TPRKB    | 0.427206653 | 3.22E-28 | Cyto_CD8.T_GZMB_GNLY_TMPO |
| ERH      | 0.687142214 | 5.68E-28 | Cyto_CD8.T_GZMB_GNLY_TMPO |
| PA2G4    | 0.756616869 | 5.72E-28 | Cyto_CD8.T_GZMB_GNLY_TMPO |
| NUDT21   | 0.460922535 | 6.79E-28 | Cyto_CD8.T_GZMB_GNLY_TMPO |
| KPNB1    | 0.630067964 | 8.84E-28 | Cyto_CD8.T_GZMB_GNLY_TMPO |
| SUMO2    | 0.643018835 | 1.01E-27 | Cyto_CD8.T_GZMB_GNLY_TMPO |
| PSMC3    | 0.589792682 | 1.12E-27 | Cyto_CD8.T_GZMB_GNLY_TMPO |
| RBBP7    | 0.621453439 | 1.13E-27 | Cyto_CD8.T_GZMB_GNLY_TMPO |
| RCC2     | 0.483457258 | 1.20E-27 | Cyto_CD8.T_GZMB_GNLY_TMPO |
| CDK5RAP2 | 0.389748172 | 1.49E-27 | Cyto_CD8.T_GZMB_GNLY_TMPO |
| IFI27L1  | 0.306746177 | 1.74E-27 | Cyto_CD8.T_GZMB_GNLY_TMPO |
| NASP     | 0.909374189 | 1.75E-27 | Cyto_CD8.T_GZMB_GNLY_TMPO |
| POLR3K   | 0.440081313 | 2.22E-27 | Cyto_CD8.T_GZMB_GNLY_TMPO |
| VIM      | 1.355876059 | 4.42E-27 | Cyto_CD8.T_GZMB_GNLY_TMPO |
| PFN1     | 0.789813114 | 1.05E-26 | Cyto_CD8.T_GZMB_GNLY_TMPO |
| CDK4     | 0.428232018 | 1.63E-26 | Cyto_CD8.T_GZMB_GNLY_TMPO |
| COP3     | 0.60121978  | 1.64E-26 | Cyto_CD8.T_GZMB_GNLY_TMPO |
| HP1BP3   | 0.749146393 | 1.65E-26 | Cyto_CD8.T_GZMB_GNLY_TMPO |
| FDXR     | 0.269473541 | 2.22E-26 | Cyto_CD8.T_GZMB_GNLY_TMPO |
| PIN1     | 0.56314993  | 3.44E-26 | Cyto_CD8.T_GZMB_GNLY_TMPO |
| CBX1     | 0.397239736 | 4.73E-26 | Cyto_CD8.T_GZMB_GNLY_TMPO |
| CEP135   | 0.29941408  | 5.76E-26 | Cyto_CD8.T_GZMB_GNLY_TMPO |
| SMCO4    | 0.273932418 | 9.92E-26 | Cyto_CD8.T_GZMB_GNLY_TMPO |
| CFAP20   | 0.342865798 | 1.09E-25 | Cyto_CD8.T_GZMB_GNLY_TMPO |
| HY1      | 0.257904729 | 1.11E-25 | Cyto_CD8.T_GZMB_GNLY_TMPO |
| SLBP     | 0.781267457 | 2.13E-25 | Cyto_CD8.T_GZMB_GNLY_TMPO |
| ARL6IP1  | 0.968730747 | 2.44E-25 | Cyto_CD8.T_GZMB_GNLY_TMPO |
| BUB3     | 0.705572324 | 2.79E-25 | Cyto_CD8.T_GZMB_GNLY_TMPO |
| PCNT     | 0.347083963 | 3.03E-25 | Cyto_CD8.T_GZMB_GNLY_TMPO |
| INAFM1   | 0.269339393 | 4.21E-25 | Cyto_CD8.T_GZMB_GNLY_TMPO |
| NUDT15   | 0.280193836 | 5.75E-25 | Cyto_CD8.T_GZMB_GNLY_TMPO |
| ANAPC11  | 0.655881591 | 6.47E-25 | Cyto_CD8.T_GZMB_GNLY_TMPO |



|           |             |          |                           |
|-----------|-------------|----------|---------------------------|
| E2F3      | 0.428971626 | 8.27E-25 | Cyto_CD8.T_GZMB_GNLY_TMPO |
| HIST1H2BF | 0.358698142 | 1.26E-24 | Cyto_CD8.T_GZMB_GNLY_TMPO |
| XPO1      | 0.473687646 | 2.74E-24 | Cyto_CD8.T_GZMB_GNLY_TMPO |
| HNRNPA2B1 | 0.66590894  | 2.95E-24 | Cyto_CD8.T_GZMB_GNLY_TMPO |
| SASS6     | 0.25222482  | 3.14E-24 | Cyto_CD8.T_GZMB_GNLY_TMPO |
| ACTG1     | 0.792972237 | 3.74E-24 | Cyto_CD8.T_GZMB_GNLY_TMPO |
| SAMD1     | 0.435215795 | 4.19E-24 | Cyto_CD8.T_GZMB_GNLY_TMPO |
| PDS5B     | 0.406698364 | 4.27E-24 | Cyto_CD8.T_GZMB_GNLY_TMPO |
| HNRNPF    | 0.738158747 | 4.32E-24 | Cyto_CD8.T_GZMB_GNLY_TMPO |
| PCBP2     | 0.661288675 | 4.38E-24 | Cyto_CD8.T_GZMB_GNLY_TMPO |
| NUP160    | 0.324935766 | 5.40E-24 | Cyto_CD8.T_GZMB_GNLY_TMPO |
| TAF15     | 0.587086154 | 5.59E-24 | Cyto_CD8.T_GZMB_GNLY_TMPO |
| DOCK2     | 0.494248159 | 7.76E-24 | Cyto_CD8.T_GZMB_GNLY_TMPO |
| MZT2A     | 0.610791748 | 1.14E-23 | Cyto_CD8.T_GZMB_GNLY_TMPO |
| SFMBT1    | 0.286242263 | 1.86E-23 | Cyto_CD8.T_GZMB_GNLY_TMPO |
| SRSF3     | 0.691110355 | 2.30E-23 | Cyto_CD8.T_GZMB_GNLY_TMPO |
| EXOSC8    | 0.441537695 | 4.19E-23 | Cyto_CD8.T_GZMB_GNLY_TMPO |
| MPHOSPH9  | 0.348882095 | 4.45E-23 | Cyto_CD8.T_GZMB_GNLY_TMPO |
| BAZ1B     | 0.519483646 | 5.38E-23 | Cyto_CD8.T_GZMB_GNLY_TMPO |
| SYNE2     | 0.840848062 | 7.33E-23 | Cyto_CD8.T_GZMB_GNLY_TMPO |
| EMC9      | 0.25461235  | 8.02E-23 | Cyto_CD8.T_GZMB_GNLY_TMPO |
| CASP8AP2  | 0.334413096 | 1.57E-22 | Cyto_CD8.T_GZMB_GNLY_TMPO |
| PPP1CA    | 0.63981586  | 1.72E-22 | Cyto_CD8.T_GZMB_GNLY_TMPO |
| ZDHHC12   | 0.365004272 | 2.41E-22 | Cyto_CD8.T_GZMB_GNLY_TMPO |
| SSNA1     | 0.535697414 | 2.42E-22 | Cyto_CD8.T_GZMB_GNLY_TMPO |
| WEE1      | 0.335350491 | 2.58E-22 | Cyto_CD8.T_GZMB_GNLY_TMPO |
| HNRNPUL2  | 0.442139545 | 4.89E-22 | Cyto_CD8.T_GZMB_GNLY_TMPO |
| C4orf46   | 0.275321879 | 5.68E-22 | Cyto_CD8.T_GZMB_GNLY_TMPO |
| RECQL     | 0.462498967 | 7.27E-22 | Cyto_CD8.T_GZMB_GNLY_TMPO |
| XRCC5     | 0.653767741 | 8.53E-22 | Cyto_CD8.T_GZMB_GNLY_TMPO |
| RPA1      | 0.355706683 | 8.55E-22 | Cyto_CD8.T_GZMB_GNLY_TMPO |
| HAT1      | 0.512427635 | 1.06E-21 | Cyto_CD8.T_GZMB_GNLY_TMPO |
| SNRPG     | 0.715797131 | 1.15E-21 | Cyto_CD8.T_GZMB_GNLY_TMPO |
| RBM17     | 0.566081963 | 1.29E-21 | Cyto_CD8.T_GZMB_GNLY_TMPO |
| NUP50     | 0.462622245 | 1.42E-21 | Cyto_CD8.T_GZMB_GNLY_TMPO |
| MRPL51    | 0.558266088 | 1.69E-21 | Cyto_CD8.T_GZMB_GNLY_TMPO |
| MED30     | 0.447708079 | 1.83E-21 | Cyto_CD8.T_GZMB_GNLY_TMPO |
| TALDO1    | 0.609435611 | 1.84E-21 | Cyto_CD8.T_GZMB_GNLY_TMPO |
| MCUB      | 0.447291089 | 1.96E-21 | Cyto_CD8.T_GZMB_GNLY_TMPO |
| AKR7A2    | 0.484721368 | 2.01E-21 | Cyto_CD8.T_GZMB_GNLY_TMPO |
| CKAP2     | 0.414203858 | 2.98E-21 | Cyto_CD8.T_GZMB_GNLY_TMPO |
| CMC2      | 0.53819066  | 3.27E-21 | Cyto_CD8.T_GZMB_GNLY_TMPO |
| CEP57     | 0.552037591 | 4.42E-21 | Cyto_CD8.T_GZMB_GNLY_TMPO |
| NAA38     | 0.53456774  | 4.46E-21 | Cyto_CD8.T_GZMB_GNLY_TMPO |
| PSMB3     | 0.597895434 | 6.71E-21 | Cyto_CD8.T_GZMB_GNLY_TMPO |
| OXCT1     | 0.370677625 | 7.06E-21 | Cyto_CD8.T_GZMB_GNLY_TMPO |
| GINS4     | 0.258045918 | 7.25E-21 | Cyto_CD8.T_GZMB_GNLY_TMPO |
| LSM3      | 0.560963706 | 9.63E-21 | Cyto_CD8.T_GZMB_GNLY_TMPO |
| SLF2      | 0.33823769  | 1.28E-20 | Cyto_CD8.T_GZMB_GNLY_TMPO |
| CTDSP12   | 0.361459876 | 1.57E-20 | Cyto_CD8.T_GZMB_GNLY_TMPO |
| RLP1      | 0.467820147 | 2.41E-20 | Cyto_CD8.T_GZMB_GNLY_TMPO |
| LUC7L2    | 0.54669046  | 2.73E-20 | Cyto_CD8.T_GZMB_GNLY_TMPO |
| GUSB      | 0.398457245 | 3.36E-20 | Cyto_CD8.T_GZMB_GNLY_TMPO |
| FDPS      | 0.531649615 | 3.43E-20 | Cyto_CD8.T_GZMB_GNLY_TMPO |
| PSMB8     | 0.657209877 | 3.53E-20 | Cyto_CD8.T_GZMB_GNLY_TMPO |
| PRKDC     | 0.696242225 | 3.69E-20 | Cyto_CD8.T_GZMB_GNLY_TMPO |
| DBI       | 0.653973327 | 4.78E-20 | Cyto_CD8.T_GZMB_GNLY_TMPO |
| POLE3     | 0.466562009 | 5.58E-20 | Cyto_CD8.T_GZMB_GNLY_TMPO |
| RABL6     | 0.437443347 | 6.43E-20 | Cyto_CD8.T_GZMB_GNLY_TMPO |
| TBC1D10B  | 0.329032995 | 6.86E-20 | Cyto_CD8.T_GZMB_GNLY_TMPO |
| AP2S1     | 0.571608329 | 9.21E-20 | Cyto_CD8.T_GZMB_GNLY_TMPO |
| NUP210    | 0.411033042 | 9.63E-20 | Cyto_CD8.T_GZMB_GNLY_TMPO |
| ARPC5L    | 0.59584475  | 1.06E-19 | Cyto_CD8.T_GZMB_GNLY_TMPO |
| PBRM1     | 0.53500527  | 1.24E-19 | Cyto_CD8.T_GZMB_GNLY_TMPO |

|          |             |          |                           |
|----------|-------------|----------|---------------------------|
| C1orf35  | 0.344037556 | 1.76E-19 | Cyto_CD8.T_GZMB_GNLY_TMPO |
| NOP56    | 0.528326549 | 1.89E-19 | Cyto_CD8.T_GZMB_GNLY_TMPO |
| ATL3     | 0.318361079 | 2.05E-19 | Cyto_CD8.T_GZMB_GNLY_TMPO |
| HNRNPA3  | 0.622769712 | 2.12E-19 | Cyto_CD8.T_GZMB_GNLY_TMPO |
| SRRM1    | 0.611974855 | 2.37E-19 | Cyto_CD8.T_GZMB_GNLY_TMPO |
| MRPS11   | 0.364721266 | 2.49E-19 | Cyto_CD8.T_GZMB_GNLY_TMPO |
| MT2A     | 0.994844589 | 2.65E-19 | Cyto_CD8.T_GZMB_GNLY_TMPO |
| MTHFD1   | 0.272794918 | 3.10E-19 | Cyto_CD8.T_GZMB_GNLY_TMPO |
| UBB      | 0.647250419 | 3.29E-19 | Cyto_CD8.T_GZMB_GNLY_TMPO |
| CCDC88A  | 0.29619767  | 3.29E-19 | Cyto_CD8.T_GZMB_GNLY_TMPO |
| PNN      | 0.569001438 | 4.12E-19 | Cyto_CD8.T_GZMB_GNLY_TMPO |
| ARPC5    | 0.632699411 | 4.48E-19 | Cyto_CD8.T_GZMB_GNLY_TMPO |
| TRNAU1AP | 0.392827925 | 5.12E-19 | Cyto_CD8.T_GZMB_GNLY_TMPO |
| POP7     | 0.325810247 | 5.61E-19 | Cyto_CD8.T_GZMB_GNLY_TMPO |
| POU2F1   | 0.298851626 | 8.06E-19 | Cyto_CD8.T_GZMB_GNLY_TMPO |
| REV3L    | 0.435087096 | 8.84E-19 | Cyto_CD8.T_GZMB_GNLY_TMPO |
| DPM2     | 0.325316262 | 1.06E-18 | Cyto_CD8.T_GZMB_GNLY_TMPO |
| SHMT2    | 0.310284229 | 1.11E-18 | Cyto_CD8.T_GZMB_GNLY_TMPO |
| LSM2     | 0.512519832 | 1.24E-18 | Cyto_CD8.T_GZMB_GNLY_TMPO |
| PHF5A    | 0.314909932 | 1.92E-18 | Cyto_CD8.T_GZMB_GNLY_TMPO |
| RBX1     | 0.583366787 | 2.02E-18 | Cyto_CD8.T_GZMB_GNLY_TMPO |
| RUVBL2   | 0.279928293 | 2.16E-18 | Cyto_CD8.T_GZMB_GNLY_TMPO |
| TCERG1   | 0.391259363 | 2.18E-18 | Cyto_CD8.T_GZMB_GNLY_TMPO |
| HMGNB    | 0.556219694 | 2.35E-18 | Cyto_CD8.T_GZMB_GNLY_TMPO |
| SH3GLB2  | 0.341270748 | 2.58E-18 | Cyto_CD8.T_GZMB_GNLY_TMPO |
| COMMD4   | 0.43839023  | 2.65E-18 | Cyto_CD8.T_GZMB_GNLY_TMPO |
| TMEM107  | 0.319139446 | 3.02E-18 | Cyto_CD8.T_GZMB_GNLY_TMPO |
| NIBAN1   | 0.393739134 | 3.37E-18 | Cyto_CD8.T_GZMB_GNLY_TMPO |
| NFATC2IP | 0.453638561 | 4.11E-18 | Cyto_CD8.T_GZMB_GNLY_TMPO |
| BAX      | 0.632287372 | 4.12E-18 | Cyto_CD8.T_GZMB_GNLY_TMPO |
| TDP1     | 0.270272375 | 4.52E-18 | Cyto_CD8.T_GZMB_GNLY_TMPO |
| PSMB2    | 0.57745863  | 5.52E-18 | Cyto_CD8.T_GZMB_GNLY_TMPO |
| KIF2A    | 0.468509589 | 9.00E-18 | Cyto_CD8.T_GZMB_GNLY_TMPO |
| CASP2    | 0.28066097  | 9.87E-18 | Cyto_CD8.T_GZMB_GNLY_TMPO |
| GGCT     | 0.291427298 | 1.26E-17 | Cyto_CD8.T_GZMB_GNLY_TMPO |
| ACAT2    | 0.362234874 | 1.30E-17 | Cyto_CD8.T_GZMB_GNLY_TMPO |
| TAF1B    | 0.275843721 | 1.62E-17 | Cyto_CD8.T_GZMB_GNLY_TMPO |
| ACTL6A   | 0.27617809  | 2.08E-17 | Cyto_CD8.T_GZMB_GNLY_TMPO |
| PRDX3    | 0.394959025 | 2.19E-17 | Cyto_CD8.T_GZMB_GNLY_TMPO |
| DBF4     | 0.40315451  | 2.20E-17 | Cyto_CD8.T_GZMB_GNLY_TMPO |
| SNRPD3   | 0.482744947 | 2.46E-17 | Cyto_CD8.T_GZMB_GNLY_TMPO |
| POP4     | 0.351512984 | 3.89E-17 | Cyto_CD8.T_GZMB_GNLY_TMPO |
| LRRFIP1  | 0.664266068 | 4.58E-17 | Cyto_CD8.T_GZMB_GNLY_TMPO |
| RPA2     | 0.432695692 | 4.94E-17 | Cyto_CD8.T_GZMB_GNLY_TMPO |
| SPATS2   | 0.268029164 | 5.44E-17 | Cyto_CD8.T_GZMB_GNLY_TMPO |
| SET      | 0.65932374  | 5.53E-17 | Cyto_CD8.T_GZMB_GNLY_TMPO |
| UBALD2   | 0.687476583 | 6.38E-17 | Cyto_CD8.T_GZMB_GNLY_TMPO |
| BLOC1S1  | 0.516347691 | 6.80E-17 | Cyto_CD8.T_GZMB_GNLY_TMPO |
| VBP1     | 0.407547333 | 8.06E-17 | Cyto_CD8.T_GZMB_GNLY_TMPO |
| TPR      | 0.597396899 | 9.55E-17 | Cyto_CD8.T_GZMB_GNLY_TMPO |
| NUMA1    | 0.392843119 | 9.71E-17 | Cyto_CD8.T_GZMB_GNLY_TMPO |
| EIF2S2   | 0.490393954 | 9.73E-17 | Cyto_CD8.T_GZMB_GNLY_TMPO |
| STAG2    | 0.535546176 | 1.22E-16 | Cyto_CD8.T_GZMB_GNLY_TMPO |
| GLIPR2   | 0.402654519 | 1.36E-16 | Cyto_CD8.T_GZMB_GNLY_TMPO |
| MRPL11   | 0.408372944 | 1.43E-16 | Cyto_CD8.T_GZMB_GNLY_TMPO |
| MRPS16   | 0.312546197 | 1.86E-16 | Cyto_CD8.T_GZMB_GNLY_TMPO |
| FAM76B   | 0.320060282 | 1.99E-16 | Cyto_CD8.T_GZMB_GNLY_TMPO |
| UBE2I    | 0.553227394 | 2.32E-16 | Cyto_CD8.T_GZMB_GNLY_TMPO |
| MTF2     | 0.442826228 | 2.45E-16 | Cyto_CD8.T_GZMB_GNLY_TMPO |
| PARP1    | 0.480060041 | 2.78E-16 | Cyto_CD8.T_GZMB_GNLY_TMPO |
| HAUS4    | 0.255189976 | 2.79E-16 | Cyto_CD8.T_GZMB_GNLY_TMPO |
| CLIC1    | 0.508820049 | 2.82E-16 | Cyto_CD8.T_GZMB_GNLY_TMPO |
| PGAM1    | 0.490895811 | 3.06E-16 | Cyto_CD8.T_GZMB_GNLY_TMPO |
| ANKRD36C | 0.38587672  | 3.15E-16 | Cyto_CD8.T_GZMB_GNLY_TMPO |

|           |             |          |                           |
|-----------|-------------|----------|---------------------------|
| DAZAP1    | 0.434357025 | 3.36E-16 | Cyto_CD8.T_GZMB_GNLY_TMPO |
| YBX1      | 0.559467037 | 3.40E-16 | Cyto_CD8.T_GZMB_GNLY_TMPO |
| PSMA4     | 0.538165347 | 3.41E-16 | Cyto_CD8.T_GZMB_GNLY_TMPO |
| DCAF7     | 0.41270428  | 3.78E-16 | Cyto_CD8.T_GZMB_GNLY_TMPO |
| CCDC28B   | 0.434042327 | 4.19E-16 | Cyto_CD8.T_GZMB_GNLY_TMPO |
| PRIM2     | 0.271315438 | 5.55E-16 | Cyto_CD8.T_GZMB_GNLY_TMPO |
| PMM1      | 0.290771471 | 6.13E-16 | Cyto_CD8.T_GZMB_GNLY_TMPO |
| SARNP     | 0.395535991 | 6.88E-16 | Cyto_CD8.T_GZMB_GNLY_TMPO |
| FAF1      | 0.318801931 | 6.93E-16 | Cyto_CD8.T_GZMB_GNLY_TMPO |
| BRD7      | 0.449930739 | 8.41E-16 | Cyto_CD8.T_GZMB_GNLY_TMPO |
| EXOSC9    | 0.319576145 | 8.49E-16 | Cyto_CD8.T_GZMB_GNLY_TMPO |
| PDCD5     | 0.461249303 | 9.00E-16 | Cyto_CD8.T_GZMB_GNLY_TMPO |
| SEPTIN7   | 0.529280761 | 1.02E-15 | Cyto_CD8.T_GZMB_GNLY_TMPO |
| PLP2      | 0.702673982 | 1.06E-15 | Cyto_CD8.T_GZMB_GNLY_TMPO |
| ACTB      | 0.789950548 | 1.31E-15 | Cyto_CD8.T_GZMB_GNLY_TMPO |
| WDR54     | 0.324377131 | 1.32E-15 | Cyto_CD8.T_GZMB_GNLY_TMPO |
| SNRNP25   | 0.298555572 | 1.40E-15 | Cyto_CD8.T_GZMB_GNLY_TMPO |
| ITGAE     | 0.386532907 | 1.48E-15 | Cyto_CD8.T_GZMB_GNLY_TMPO |
| SRSF4     | 0.495949084 | 1.57E-15 | Cyto_CD8.T_GZMB_GNLY_TMPO |
| GLRX5     | 0.39418022  | 1.99E-15 | Cyto_CD8.T_GZMB_GNLY_TMPO |
| NELFE     | 0.34874018  | 2.06E-15 | Cyto_CD8.T_GZMB_GNLY_TMPO |
| HSPA14.1  | 0.260857291 | 2.42E-15 | Cyto_CD8.T_GZMB_GNLY_TMPO |
| PAFAH1B3  | 0.30049927  | 2.44E-15 | Cyto_CD8.T_GZMB_GNLY_TMPO |
| SF3B2     | 0.57667271  | 2.47E-15 | Cyto_CD8.T_GZMB_GNLY_TMPO |
| COX5A     | 0.600049342 | 2.54E-15 | Cyto_CD8.T_GZMB_GNLY_TMPO |
| CALM2     | 0.555317927 | 3.06E-15 | Cyto_CD8.T_GZMB_GNLY_TMPO |
| SUGP2     | 0.363096656 | 4.39E-15 | Cyto_CD8.T_GZMB_GNLY_TMPO |
| LINC00342 | 0.447861621 | 4.49E-15 | Cyto_CD8.T_GZMB_GNLY_TMPO |
| CHCHD2    | 0.579636639 | 4.79E-15 | Cyto_CD8.T_GZMB_GNLY_TMPO |
| DNAJC8    | 0.491975213 | 5.31E-15 | Cyto_CD8.T_GZMB_GNLY_TMPO |
| CTNNBIP1  | 0.278379272 | 5.36E-15 | Cyto_CD8.T_GZMB_GNLY_TMPO |
| PSMG2     | 0.420145355 | 6.74E-15 | Cyto_CD8.T_GZMB_GNLY_TMPO |
| ISY1      | 0.370163021 | 7.10E-15 | Cyto_CD8.T_GZMB_GNLY_TMPO |
| SLFN13    | 0.409630392 | 7.20E-15 | Cyto_CD8.T_GZMB_GNLY_TMPO |
| SPINDOC   | 0.256596801 | 8.16E-15 | Cyto_CD8.T_GZMB_GNLY_TMPO |
| ILKAP     | 0.391276853 | 8.49E-15 | Cyto_CD8.T_GZMB_GNLY_TMPO |
| SNHG6     | 0.619415375 | 8.60E-15 | Cyto_CD8.T_GZMB_GNLY_TMPO |
| ARL6IP6   | 0.346391991 | 8.94E-15 | Cyto_CD8.T_GZMB_GNLY_TMPO |
| SF3B3     | 0.274972966 | 1.09E-14 | Cyto_CD8.T_GZMB_GNLY_TMPO |
| TP11      | 0.712302889 | 1.22E-14 | Cyto_CD8.T_GZMB_GNLY_TMPO |
| SAP30     | 0.418464264 | 1.31E-14 | Cyto_CD8.T_GZMB_GNLY_TMPO |
| MAGOH     | 0.476861223 | 1.54E-14 | Cyto_CD8.T_GZMB_GNLY_TMPO |
| PMVK      | 0.344565926 | 1.55E-14 | Cyto_CD8.T_GZMB_GNLY_TMPO |
| STRN      | 0.306119394 | 1.78E-14 | Cyto_CD8.T_GZMB_GNLY_TMPO |
| RBBP4     | 0.450576539 | 2.10E-14 | Cyto_CD8.T_GZMB_GNLY_TMPO |
| STAG1     | 0.336889969 | 2.12E-14 | Cyto_CD8.T_GZMB_GNLY_TMPO |
| PGP       | 0.371166547 | 2.15E-14 | Cyto_CD8.T_GZMB_GNLY_TMPO |
| ATP5MG    | 0.477394332 | 2.44E-14 | Cyto_CD8.T_GZMB_GNLY_TMPO |
| RIF1      | 0.421089687 | 2.50E-14 | Cyto_CD8.T_GZMB_GNLY_TMPO |
| PSMA1     | 0.46168848  | 2.93E-14 | Cyto_CD8.T_GZMB_GNLY_TMPO |
| HIST1H2BG | 0.328400769 | 3.28E-14 | Cyto_CD8.T_GZMB_GNLY_TMPO |
| MTHFD2    | 0.363555204 | 3.37E-14 | Cyto_CD8.T_GZMB_GNLY_TMPO |
| COX6A1    | 0.524325248 | 3.64E-14 | Cyto_CD8.T_GZMB_GNLY_TMPO |
| ZFP91     | 0.443818653 | 3.66E-14 | Cyto_CD8.T_GZMB_GNLY_TMPO |
| PRRC2A    | 0.326610174 | 3.88E-14 | Cyto_CD8.T_GZMB_GNLY_TMPO |
| RPLP0     | 0.555983462 | 3.97E-14 | Cyto_CD8.T_GZMB_GNLY_TMPO |
| TRIM28    | 0.373129156 | 4.41E-14 | Cyto_CD8.T_GZMB_GNLY_TMPO |
| ILF3      | 0.429319251 | 5.20E-14 | Cyto_CD8.T_GZMB_GNLY_TMPO |
| NDUF56    | 0.481253863 | 5.62E-14 | Cyto_CD8.T_GZMB_GNLY_TMPO |
| TPP2      | 0.310166929 | 5.75E-14 | Cyto_CD8.T_GZMB_GNLY_TMPO |
| NDUFA7    | 0.419515633 | 6.01E-14 | Cyto_CD8.T_GZMB_GNLY_TMPO |
| HNRNPUL1  | 0.416820795 | 6.51E-14 | Cyto_CD8.T_GZMB_GNLY_TMPO |
| DDX46     | 0.478696701 | 6.53E-14 | Cyto_CD8.T_GZMB_GNLY_TMPO |
| PDIA6     | 0.467328634 | 6.64E-14 | Cyto_CD8.T_GZMB_GNLY_TMPO |

|         |             |          |                           |
|---------|-------------|----------|---------------------------|
| ACP1    | 0.449985031 | 7.84E-14 | Cyto_CD8.T_GZMB_GNLY_TMPO |
| YWHAQ   | 0.46060331  | 7.93E-14 | Cyto_CD8.T_GZMB_GNLY_TMPO |
| CORO1A  | 0.627396464 | 8.42E-14 | Cyto_CD8.T_GZMB_GNLY_TMPO |
| DHX15   | 0.358193375 | 8.89E-14 | Cyto_CD8.T_GZMB_GNLY_TMPO |
| ARPC2   | 0.463391685 | 8.95E-14 | Cyto_CD8.T_GZMB_GNLY_TMPO |
| PIIH    | 0.377374203 | 9.02E-14 | Cyto_CD8.T_GZMB_GNLY_TMPO |
| RAB5IF  | 0.537278728 | 9.13E-14 | Cyto_CD8.T_GZMB_GNLY_TMPO |
| TXLNA   | 0.278940812 | 9.70E-14 | Cyto_CD8.T_GZMB_GNLY_TMPO |
| TMEM18  | 0.322606488 | 9.90E-14 | Cyto_CD8.T_GZMB_GNLY_TMPO |
| KHDRBS1 | 0.466225215 | 1.01E-13 | Cyto_CD8.T_GZMB_GNLY_TMPO |
| CLTA    | 0.428530795 | 1.22E-13 | Cyto_CD8.T_GZMB_GNLY_TMPO |
| NDUFA2  | 0.427983836 | 1.26E-13 | Cyto_CD8.T_GZMB_GNLY_TMPO |
| CEP78   | 0.3517265   | 1.26E-13 | Cyto_CD8.T_GZMB_GNLY_TMPO |
| COX6C   | 0.503778267 | 1.34E-13 | Cyto_CD8.T_GZMB_GNLY_TMPO |
| HMGA1   | 0.462724491 | 1.36E-13 | Cyto_CD8.T_GZMB_GNLY_TMPO |
| SMS     | 0.38963061  | 1.52E-13 | Cyto_CD8.T_GZMB_GNLY_TMPO |
| TFDP2   | 0.378672172 | 1.80E-13 | Cyto_CD8.T_GZMB_GNLY_TMPO |
| HDAC1   | 0.434260906 | 1.88E-13 | Cyto_CD8.T_GZMB_GNLY_TMPO |
| SEPHS1  | 0.251978062 | 2.09E-13 | Cyto_CD8.T_GZMB_GNLY_TMPO |
| RBMX    | 0.439146296 | 2.17E-13 | Cyto_CD8.T_GZMB_GNLY_TMPO |
| ENO1    | 0.644783719 | 2.44E-13 | Cyto_CD8.T_GZMB_GNLY_TMPO |
| CCDC14  | 0.265882679 | 2.52E-13 | Cyto_CD8.T_GZMB_GNLY_TMPO |
| TMEM238 | 0.422641416 | 3.03E-13 | Cyto_CD8.T_GZMB_GNLY_TMPO |
| UQCC2   | 0.353731368 | 3.15E-13 | Cyto_CD8.T_GZMB_GNLY_TMPO |
| HDGF    | 0.415388823 | 3.18E-13 | Cyto_CD8.T_GZMB_GNLY_TMPO |
| N4BP2   | 0.294894719 | 4.32E-13 | Cyto_CD8.T_GZMB_GNLY_TMPO |
| COTL1   | 0.994018884 | 4.40E-13 | Cyto_CD8.T_GZMB_GNLY_TMPO |
| PPDPF   | 0.584843982 | 4.87E-13 | Cyto_CD8.T_GZMB_GNLY_TMPO |
| AHI1    | 0.395380618 | 4.91E-13 | Cyto_CD8.T_GZMB_GNLY_TMPO |
| GANAB   | 0.290086321 | 4.99E-13 | Cyto_CD8.T_GZMB_GNLY_TMPO |
| EIF4A3  | 0.498087895 | 5.17E-13 | Cyto_CD8.T_GZMB_GNLY_TMPO |
| RAC2    | 0.568303074 | 5.26E-13 | Cyto_CD8.T_GZMB_GNLY_TMPO |
| GSTO1   | 0.446494367 | 5.31E-13 | Cyto_CD8.T_GZMB_GNLY_TMPO |
| SRPK1   | 0.376433353 | 5.82E-13 | Cyto_CD8.T_GZMB_GNLY_TMPO |
| SUDS3   | 0.327863083 | 6.10E-13 | Cyto_CD8.T_GZMB_GNLY_TMPO |
| TIPRL   | 0.374613286 | 6.66E-13 | Cyto_CD8.T_GZMB_GNLY_TMPO |
| ANAPC15 | 0.279061241 | 7.88E-13 | Cyto_CD8.T_GZMB_GNLY_TMPO |
| RHOA    | 0.507465332 | 8.03E-13 | Cyto_CD8.T_GZMB_GNLY_TMPO |
| TPM3    | 0.5260731   | 8.51E-13 | Cyto_CD8.T_GZMB_GNLY_TMPO |
| POLD2   | 0.263725732 | 1.30E-12 | Cyto_CD8.T_GZMB_GNLY_TMPO |
| YPEL1   | 0.258641712 | 1.50E-12 | Cyto_CD8.T_GZMB_GNLY_TMPO |
| NDUFB1  | 0.470876675 | 1.59E-12 | Cyto_CD8.T_GZMB_GNLY_TMPO |
| LDHB    | 0.574702953 | 1.84E-12 | Cyto_CD8.T_GZMB_GNLY_TMPO |
| TMEM242 | 0.278736885 | 2.01E-12 | Cyto_CD8.T_GZMB_GNLY_TMPO |
| ATP5MC3 | 0.484580591 | 2.54E-12 | Cyto_CD8.T_GZMB_GNLY_TMPO |
| ZNF524  | 0.27175822  | 2.55E-12 | Cyto_CD8.T_GZMB_GNLY_TMPO |
| ODF2    | 0.251056085 | 3.28E-12 | Cyto_CD8.T_GZMB_GNLY_TMPO |
| PSMD2   | 0.370329002 | 3.55E-12 | Cyto_CD8.T_GZMB_GNLY_TMPO |
| TMUB1   | 0.359806547 | 3.95E-12 | Cyto_CD8.T_GZMB_GNLY_TMPO |
| ELP6    | 0.256534869 | 4.45E-12 | Cyto_CD8.T_GZMB_GNLY_TMPO |
| HPF1    | 0.282306058 | 5.09E-12 | Cyto_CD8.T_GZMB_GNLY_TMPO |
| THOC2   | 0.400310033 | 5.16E-12 | Cyto_CD8.T_GZMB_GNLY_TMPO |
| PSMD8   | 0.452147359 | 5.50E-12 | Cyto_CD8.T_GZMB_GNLY_TMPO |
| NDUFV1  | 0.348053136 | 5.71E-12 | Cyto_CD8.T_GZMB_GNLY_TMPO |
| NAP1L4  | 0.441469695 | 6.12E-12 | Cyto_CD8.T_GZMB_GNLY_TMPO |
| IMPDH2  | 0.286114844 | 7.19E-12 | Cyto_CD8.T_GZMB_GNLY_TMPO |
| TESC    | 0.430988155 | 7.72E-12 | Cyto_CD8.T_GZMB_GNLY_TMPO |
| SNRNP40 | 0.366509798 | 1.12E-11 | Cyto_CD8.T_GZMB_GNLY_TMPO |
| USP39   | 0.250733074 | 1.13E-11 | Cyto_CD8.T_GZMB_GNLY_TMPO |
| BUD31   | 0.422319633 | 1.15E-11 | Cyto_CD8.T_GZMB_GNLY_TMPO |
| SRP9    | 0.449200767 | 1.30E-11 | Cyto_CD8.T_GZMB_GNLY_TMPO |
| RPS6KA5 | 0.301152911 | 1.34E-11 | Cyto_CD8.T_GZMB_GNLY_TMPO |
| SNRPA1  | 0.382556688 | 1.35E-11 | Cyto_CD8.T_GZMB_GNLY_TMPO |
| LCP1    | 0.575992176 | 1.39E-11 | Cyto_CD8.T_GZMB_GNLY_TMPO |

|          |             |          |                           |
|----------|-------------|----------|---------------------------|
| CGAS     | 0.291868811 | 1.46E-11 | Cyto_CD8.T_GZMB_GNLY_TMPO |
| UFD1     | 0.377918727 | 1.57E-11 | Cyto_CD8.T_GZMB_GNLY_TMPO |
| KPNA2    | 0.509240766 | 1.63E-11 | Cyto_CD8.T_GZMB_GNLY_TMPO |
| GPAA1    | 0.343597187 | 1.63E-11 | Cyto_CD8.T_GZMB_GNLY_TMPO |
| MRPL37   | 0.265214653 | 1.64E-11 | Cyto_CD8.T_GZMB_GNLY_TMPO |
| SCCPDH   | 0.26896477  | 1.65E-11 | Cyto_CD8.T_GZMB_GNLY_TMPO |
| RPL26L1  | 0.259857286 | 1.68E-11 | Cyto_CD8.T_GZMB_GNLY_TMPO |
| PSMD14   | 0.345017986 | 1.77E-11 | Cyto_CD8.T_GZMB_GNLY_TMPO |
| NDUFAF3  | 0.430038175 | 1.85E-11 | Cyto_CD8.T_GZMB_GNLY_TMPO |
| TES      | 0.399268995 | 1.97E-11 | Cyto_CD8.T_GZMB_GNLY_TMPO |
| UPF3B    | 0.364193946 | 2.35E-11 | Cyto_CD8.T_GZMB_GNLY_TMPO |
| PSME2    | 0.55843364  | 2.48E-11 | Cyto_CD8.T_GZMB_GNLY_TMPO |
| TBC1D15  | 0.277770936 | 2.50E-11 | Cyto_CD8.T_GZMB_GNLY_TMPO |
| RBBP6    | 0.416426808 | 2.98E-11 | Cyto_CD8.T_GZMB_GNLY_TMPO |
| PSMD7    | 0.357377747 | 3.09E-11 | Cyto_CD8.T_GZMB_GNLY_TMPO |
| UBA2     | 0.35839734  | 3.13E-11 | Cyto_CD8.T_GZMB_GNLY_TMPO |
| NCBP3    | 0.328048649 | 3.19E-11 | Cyto_CD8.T_GZMB_GNLY_TMPO |
| EIF5A    | 0.521642659 | 3.19E-11 | Cyto_CD8.T_GZMB_GNLY_TMPO |
| PDS5A    | 0.315545564 | 3.53E-11 | Cyto_CD8.T_GZMB_GNLY_TMPO |
| MRPL23   | 0.327227369 | 3.89E-11 | Cyto_CD8.T_GZMB_GNLY_TMPO |
| HLA-DRB5 | 0.714316112 | 4.02E-11 | Cyto_CD8.T_GZMB_GNLY_TMPO |
| STK39    | 0.318145932 | 4.16E-11 | Cyto_CD8.T_GZMB_GNLY_TMPO |
| TMEM181  | 0.285644079 | 4.31E-11 | Cyto_CD8.T_GZMB_GNLY_TMPO |
| PIGX     | 0.298823216 | 4.77E-11 | Cyto_CD8.T_GZMB_GNLY_TMPO |
| TXN2     | 0.332599291 | 5.75E-11 | Cyto_CD8.T_GZMB_GNLY_TMPO |
| DDT      | 0.46730629  | 6.56E-11 | Cyto_CD8.T_GZMB_GNLY_TMPO |
| NDUFC2   | 0.411249859 | 6.98E-11 | Cyto_CD8.T_GZMB_GNLY_TMPO |
| TRAPPC1  | 0.389648208 | 7.73E-11 | Cyto_CD8.T_GZMB_GNLY_TMPO |
| DCP2     | 0.383290171 | 8.53E-11 | Cyto_CD8.T_GZMB_GNLY_TMPO |
| ELP5     | 0.321091134 | 9.86E-11 | Cyto_CD8.T_GZMB_GNLY_TMPO |
| ATG3     | 0.398354444 | 1.11E-10 | Cyto_CD8.T_GZMB_GNLY_TMPO |
| SLC9A3R1 | 0.469728478 | 1.16E-10 | Cyto_CD8.T_GZMB_GNLY_TMPO |
| SREK1    | 0.349020269 | 1.17E-10 | Cyto_CD8.T_GZMB_GNLY_TMPO |
| ZNF207   | 0.406724056 | 1.28E-10 | Cyto_CD8.T_GZMB_GNLY_TMPO |
| ARPP19   | 0.343885038 | 1.29E-10 | Cyto_CD8.T_GZMB_GNLY_TMPO |
| SASH3    | 0.364510503 | 1.31E-10 | Cyto_CD8.T_GZMB_GNLY_TMPO |
| TXNDC17  | 0.404812902 | 1.36E-10 | Cyto_CD8.T_GZMB_GNLY_TMPO |
| NUBP2    | 0.300317483 | 1.47E-10 | Cyto_CD8.T_GZMB_GNLY_TMPO |
| ITGB1    | 0.517114978 | 1.86E-10 | Cyto_CD8.T_GZMB_GNLY_TMPO |
| SNRPA    | 0.31101815  | 1.89E-10 | Cyto_CD8.T_GZMB_GNLY_TMPO |
| IER3IP1  | 0.334897218 | 1.98E-10 | Cyto_CD8.T_GZMB_GNLY_TMPO |
| ATXN2L   | 0.35186345  | 2.04E-10 | Cyto_CD8.T_GZMB_GNLY_TMPO |
| LSM7     | 0.463704482 | 2.11E-10 | Cyto_CD8.T_GZMB_GNLY_TMPO |
| SMC5     | 0.368817579 | 2.53E-10 | Cyto_CD8.T_GZMB_GNLY_TMPO |
| MRPL16   | 0.254749039 | 2.78E-10 | Cyto_CD8.T_GZMB_GNLY_TMPO |
| PPIG     | 0.404059137 | 2.82E-10 | Cyto_CD8.T_GZMB_GNLY_TMPO |
| ING2     | 0.274677545 | 2.82E-10 | Cyto_CD8.T_GZMB_GNLY_TMPO |
| BTG3     | 0.5087908   | 3.15E-10 | Cyto_CD8.T_GZMB_GNLY_TMPO |
| ELAVL1   | 0.300986023 | 3.95E-10 | Cyto_CD8.T_GZMB_GNLY_TMPO |
| HNRNPA1  | 0.441098597 | 4.27E-10 | Cyto_CD8.T_GZMB_GNLY_TMPO |
| USP48    | 0.315909193 | 4.43E-10 | Cyto_CD8.T_GZMB_GNLY_TMPO |
| RAC1     | 0.391767397 | 4.58E-10 | Cyto_CD8.T_GZMB_GNLY_TMPO |
| SEPTIN6  | 0.450627239 | 4.99E-10 | Cyto_CD8.T_GZMB_GNLY_TMPO |
| IQGAP1   | 0.480150696 | 5.09E-10 | Cyto_CD8.T_GZMB_GNLY_TMPO |
| RAB8A    | 0.409784798 | 5.12E-10 | Cyto_CD8.T_GZMB_GNLY_TMPO |
| PRPF38A  | 0.358234651 | 5.30E-10 | Cyto_CD8.T_GZMB_GNLY_TMPO |
| PSMA6    | 0.489563453 | 5.35E-10 | Cyto_CD8.T_GZMB_GNLY_TMPO |
| PHB2     | 0.368610548 | 5.93E-10 | Cyto_CD8.T_GZMB_GNLY_TMPO |
| DCPS     | 0.251541696 | 6.47E-10 | Cyto_CD8.T_GZMB_GNLY_TMPO |
| AP1S2    | 0.293747724 | 6.50E-10 | Cyto_CD8.T_GZMB_GNLY_TMPO |
| PPIL3    | 0.261185924 | 6.68E-10 | Cyto_CD8.T_GZMB_GNLY_TMPO |
| CHD4     | 0.469169581 | 6.95E-10 | Cyto_CD8.T_GZMB_GNLY_TMPO |
| APIP     | 0.251162322 | 7.42E-10 | Cyto_CD8.T_GZMB_GNLY_TMPO |
| UBE2A    | 0.379382587 | 7.92E-10 | Cyto_CD8.T_GZMB_GNLY_TMPO |

|          |             |          |                           |
|----------|-------------|----------|---------------------------|
| TNFSF10  | 0.417885157 | 7.99E-10 | Cyto_CD8.T_GZMB_GNLY_TMPO |
| PRPF40A  | 0.382484613 | 8.09E-10 | Cyto_CD8.T_GZMB_GNLY_TMPO |
| NUP58    | 0.27649579  | 8.91E-10 | Cyto_CD8.T_GZMB_GNLY_TMPO |
| HNRNPL   | 0.331494495 | 8.93E-10 | Cyto_CD8.T_GZMB_GNLY_TMPO |
| PTBP1    | 0.333292166 | 9.44E-10 | Cyto_CD8.T_GZMB_GNLY_TMPO |
| ATP5F1B  | 0.428229285 | 1.05E-09 | Cyto_CD8.T_GZMB_GNLY_TMPO |
| MAPRE1   | 0.348433611 | 1.16E-09 | Cyto_CD8.T_GZMB_GNLY_TMPO |
| CCT6A    | 0.36813911  | 1.20E-09 | Cyto_CD8.T_GZMB_GNLY_TMPO |
| DDX23    | 0.260605393 | 1.25E-09 | Cyto_CD8.T_GZMB_GNLY_TMPO |
| ARID1A   | 0.372068556 | 1.32E-09 | Cyto_CD8.T_GZMB_GNLY_TMPO |
| MRPL54   | 0.377599485 | 1.52E-09 | Cyto_CD8.T_GZMB_GNLY_TMPO |
| SEPTIN11 | 0.333162239 | 1.57E-09 | Cyto_CD8.T_GZMB_GNLY_TMPO |
| ATP5F1D  | 0.400275303 | 1.64E-09 | Cyto_CD8.T_GZMB_GNLY_TMPO |
| TPGS2    | 0.269869237 | 1.70E-09 | Cyto_CD8.T_GZMB_GNLY_TMPO |
| APPL1    | 0.326245453 | 1.70E-09 | Cyto_CD8.T_GZMB_GNLY_TMPO |
| NDUFB10  | 0.424124251 | 1.72E-09 | Cyto_CD8.T_GZMB_GNLY_TMPO |
| CISD2    | 0.301902143 | 1.92E-09 | Cyto_CD8.T_GZMB_GNLY_TMPO |
| ELOC     | 0.372873902 | 1.94E-09 | Cyto_CD8.T_GZMB_GNLY_TMPO |
| HES6     | 0.28271744  | 2.12E-09 | Cyto_CD8.T_GZMB_GNLY_TMPO |
| SFPQ     | 0.418315115 | 2.24E-09 | Cyto_CD8.T_GZMB_GNLY_TMPO |
| FABP5    | 0.602665589 | 2.25E-09 | Cyto_CD8.T_GZMB_GNLY_TMPO |
| CKLF     | 0.438821795 | 2.31E-09 | Cyto_CD8.T_GZMB_GNLY_TMPO |
| NTAN1    | 0.254171952 | 2.36E-09 | Cyto_CD8.T_GZMB_GNLY_TMPO |
| RAB1B    | 0.310762768 | 2.37E-09 | Cyto_CD8.T_GZMB_GNLY_TMPO |
| MEA1     | 0.34456013  | 2.66E-09 | Cyto_CD8.T_GZMB_GNLY_TMPO |
| ABCF1    | 0.379524295 | 3.20E-09 | Cyto_CD8.T_GZMB_GNLY_TMPO |
| NELFB    | 0.262842071 | 3.25E-09 | Cyto_CD8.T_GZMB_GNLY_TMPO |
| SPN      | 0.446226249 | 3.37E-09 | Cyto_CD8.T_GZMB_GNLY_TMPO |
| PDLIM1   | 0.344565926 | 3.57E-09 | Cyto_CD8.T_GZMB_GNLY_TMPO |
| DESI2    | 0.304964128 | 3.93E-09 | Cyto_CD8.T_GZMB_GNLY_TMPO |
| RAB11A   | 0.309599999 | 3.96E-09 | Cyto_CD8.T_GZMB_GNLY_TMPO |
| DCXR     | 0.511419697 | 4.08E-09 | Cyto_CD8.T_GZMB_GNLY_TMPO |
| RRP7A    | 0.26835727  | 4.99E-09 | Cyto_CD8.T_GZMB_GNLY_TMPO |
| TMEM258  | 0.368875067 | 5.17E-09 | Cyto_CD8.T_GZMB_GNLY_TMPO |
| PYCR2    | 0.290862306 | 5.17E-09 | Cyto_CD8.T_GZMB_GNLY_TMPO |
| SNRNP27  | 0.277951534 | 5.57E-09 | Cyto_CD8.T_GZMB_GNLY_TMPO |
| PPP4C    | 0.379646522 | 5.58E-09 | Cyto_CD8.T_GZMB_GNLY_TMPO |
| MRPS18C  | 0.288788406 | 5.58E-09 | Cyto_CD8.T_GZMB_GNLY_TMPO |
| PCM1     | 0.385872004 | 6.18E-09 | Cyto_CD8.T_GZMB_GNLY_TMPO |
| TAF3     | 0.289442788 | 6.21E-09 | Cyto_CD8.T_GZMB_GNLY_TMPO |
| KMT5A    | 0.300324069 | 6.36E-09 | Cyto_CD8.T_GZMB_GNLY_TMPO |
| ATP5F1C  | 0.371114063 | 6.57E-09 | Cyto_CD8.T_GZMB_GNLY_TMPO |
| SNX5     | 0.330204837 | 6.64E-09 | Cyto_CD8.T_GZMB_GNLY_TMPO |
| PRPF3    | 0.253820036 | 6.94E-09 | Cyto_CD8.T_GZMB_GNLY_TMPO |
| NDUFS8   | 0.351389055 | 7.38E-09 | Cyto_CD8.T_GZMB_GNLY_TMPO |
| STAT1    | 0.369550777 | 7.54E-09 | Cyto_CD8.T_GZMB_GNLY_TMPO |
| CDK11B   | 0.258276688 | 8.00E-09 | Cyto_CD8.T_GZMB_GNLY_TMPO |
| PKM      | 0.462557012 | 8.37E-09 | Cyto_CD8.T_GZMB_GNLY_TMPO |
| TRIR     | 0.378466439 | 8.57E-09 | Cyto_CD8.T_GZMB_GNLY_TMPO |
| SMARCA4  | 0.291731288 | 8.81E-09 | Cyto_CD8.T_GZMB_GNLY_TMPO |
| LARP7    | 0.294585946 | 9.64E-09 | Cyto_CD8.T_GZMB_GNLY_TMPO |
| MED6     | 0.274379592 | 9.82E-09 | Cyto_CD8.T_GZMB_GNLY_TMPO |
| RFC1     | 0.309324168 | 1.00E-08 | Cyto_CD8.T_GZMB_GNLY_TMPO |
| NDUFB3   | 0.359580787 | 1.03E-08 | Cyto_CD8.T_GZMB_GNLY_TMPO |
| PAXX     | 0.442803637 | 1.05E-08 | Cyto_CD8.T_GZMB_GNLY_TMPO |
| MRPL52   | 0.361112907 | 1.06E-08 | Cyto_CD8.T_GZMB_GNLY_TMPO |
| SPTBN1   | 0.336523344 | 1.10E-08 | Cyto_CD8.T_GZMB_GNLY_TMPO |
| EMC8     | 0.25637999  | 1.27E-08 | Cyto_CD8.T_GZMB_GNLY_TMPO |
| CACYBP   | 0.321543954 | 1.34E-08 | Cyto_CD8.T_GZMB_GNLY_TMPO |
| RPS27L   | 0.482998276 | 1.36E-08 | Cyto_CD8.T_GZMB_GNLY_TMPO |
| MBD4     | 0.342761706 | 1.39E-08 | Cyto_CD8.T_GZMB_GNLY_TMPO |
| KHSRP    | 0.288036503 | 1.41E-08 | Cyto_CD8.T_GZMB_GNLY_TMPO |
| SNRPC    | 0.312370818 | 1.49E-08 | Cyto_CD8.T_GZMB_GNLY_TMPO |
| PSMB6    | 0.417691638 | 1.49E-08 | Cyto_CD8.T_GZMB_GNLY_TMPO |

|          |             |          |                           |
|----------|-------------|----------|---------------------------|
| IMMT     | 0.27668556  | 1.59E-08 | Cyto_CD8.T_GZMB_GNLY_TMPO |
| MRPL13   | 0.263069012 | 1.67E-08 | Cyto_CD8.T_GZMB_GNLY_TMPO |
| BOLA3    | 0.277116538 | 1.77E-08 | Cyto_CD8.T_GZMB_GNLY_TMPO |
| ANKLE2   | 0.278355005 | 1.86E-08 | Cyto_CD8.T_GZMB_GNLY_TMPO |
| UCP2     | 0.412842766 | 1.92E-08 | Cyto_CD8.T_GZMB_GNLY_TMPO |
| PSMC1    | 0.28411662  | 1.94E-08 | Cyto_CD8.T_GZMB_GNLY_TMPO |
| NUP62    | 0.262527182 | 1.98E-08 | Cyto_CD8.T_GZMB_GNLY_TMPO |
| USP22    | 0.285844931 | 2.10E-08 | Cyto_CD8.T_GZMB_GNLY_TMPO |
| KATNBL1  | 0.281117294 | 2.12E-08 | Cyto_CD8.T_GZMB_GNLY_TMPO |
| RBM25    | 0.404611524 | 2.35E-08 | Cyto_CD8.T_GZMB_GNLY_TMPO |
| NDUFAB1  | 0.358204914 | 2.62E-08 | Cyto_CD8.T_GZMB_GNLY_TMPO |
| UQCRQ    | 0.402238105 | 2.79E-08 | Cyto_CD8.T_GZMB_GNLY_TMPO |
| SMCHD1   | 0.341616637 | 3.01E-08 | Cyto_CD8.T_GZMB_GNLY_TMPO |
| DDX39B   | 0.363050836 | 3.47E-08 | Cyto_CD8.T_GZMB_GNLY_TMPO |
| RBM27    | 0.312144317 | 3.53E-08 | Cyto_CD8.T_GZMB_GNLY_TMPO |
| PSMD1    | 0.291989865 | 3.54E-08 | Cyto_CD8.T_GZMB_GNLY_TMPO |
| RALBP1   | 0.314243073 | 3.77E-08 | Cyto_CD8.T_GZMB_GNLY_TMPO |
| NCL      | 0.512715208 | 3.86E-08 | Cyto_CD8.T_GZMB_GNLY_TMPO |
| HLA-DRA  | 0.619373925 | 3.86E-08 | Cyto_CD8.T_GZMB_GNLY_TMPO |
| RTRAF    | 0.382558677 | 3.91E-08 | Cyto_CD8.T_GZMB_GNLY_TMPO |
| ACAA2    | 0.373289329 | 3.96E-08 | Cyto_CD8.T_GZMB_GNLY_TMPO |
| EED      | 0.25105754  | 4.31E-08 | Cyto_CD8.T_GZMB_GNLY_TMPO |
| CYC1     | 0.368284393 | 4.72E-08 | Cyto_CD8.T_GZMB_GNLY_TMPO |
| SERBP1   | 0.43701912  | 4.76E-08 | Cyto_CD8.T_GZMB_GNLY_TMPO |
| TRIAP1   | 0.258962036 | 4.97E-08 | Cyto_CD8.T_GZMB_GNLY_TMPO |
| CREB1    | 0.408540063 | 5.12E-08 | Cyto_CD8.T_GZMB_GNLY_TMPO |
| TIMM10   | 0.264483476 | 5.75E-08 | Cyto_CD8.T_GZMB_GNLY_TMPO |
| GTF2F1   | 0.255587108 | 6.07E-08 | Cyto_CD8.T_GZMB_GNLY_TMPO |
| ATP2A3   | 0.276833662 | 6.29E-08 | Cyto_CD8.T_GZMB_GNLY_TMPO |
| RBM22    | 0.312162925 | 6.33E-08 | Cyto_CD8.T_GZMB_GNLY_TMPO |
| SF3B6    | 0.322912534 | 6.46E-08 | Cyto_CD8.T_GZMB_GNLY_TMPO |
| TOMM5    | 0.391284037 | 6.87E-08 | Cyto_CD8.T_GZMB_GNLY_TMPO |
| HNRNPM   | 0.401397887 | 7.03E-08 | Cyto_CD8.T_GZMB_GNLY_TMPO |
| TLN1     | 0.390975669 | 7.23E-08 | Cyto_CD8.T_GZMB_GNLY_TMPO |
| S100A10  | 0.549400617 | 7.66E-08 | Cyto_CD8.T_GZMB_GNLY_TMPO |
| UQCRH    | 0.384122917 | 8.25E-08 | Cyto_CD8.T_GZMB_GNLY_TMPO |
| LDHA     | 0.481701406 | 8.63E-08 | Cyto_CD8.T_GZMB_GNLY_TMPO |
| GZMA     | 0.454945479 | 8.83E-08 | Cyto_CD8.T_GZMB_GNLY_TMPO |
| HIVEP1   | 0.266305333 | 9.49E-08 | Cyto_CD8.T_GZMB_GNLY_TMPO |
| CDKN1A   | 0.348538499 | 9.92E-08 | Cyto_CD8.T_GZMB_GNLY_TMPO |
| FKBP3    | 0.289315132 | 1.09E-07 | Cyto_CD8.T_GZMB_GNLY_TMPO |
| VPS29    | 0.3321965   | 1.10E-07 | Cyto_CD8.T_GZMB_GNLY_TMPO |
| TFAM     | 0.299336657 | 1.12E-07 | Cyto_CD8.T_GZMB_GNLY_TMPO |
| RBM8A    | 0.352560407 | 1.13E-07 | Cyto_CD8.T_GZMB_GNLY_TMPO |
| TACC1    | 0.327982668 | 1.17E-07 | Cyto_CD8.T_GZMB_GNLY_TMPO |
| FKBP5    | 0.30510616  | 1.19E-07 | Cyto_CD8.T_GZMB_GNLY_TMPO |
| WAS      | 0.333030636 | 1.23E-07 | Cyto_CD8.T_GZMB_GNLY_TMPO |
| RUNX3    | 0.47377843  | 1.28E-07 | Cyto_CD8.T_GZMB_GNLY_TMPO |
| EWSR1    | 0.310036408 | 1.32E-07 | Cyto_CD8.T_GZMB_GNLY_TMPO |
| SPCS3    | 0.381776914 | 1.34E-07 | Cyto_CD8.T_GZMB_GNLY_TMPO |
| GMFG     | 0.416754192 | 1.45E-07 | Cyto_CD8.T_GZMB_GNLY_TMPO |
| FIBP     | 0.293119515 | 1.46E-07 | Cyto_CD8.T_GZMB_GNLY_TMPO |
| PNKD     | 0.277275547 | 1.47E-07 | Cyto_CD8.T_GZMB_GNLY_TMPO |
| TP53I13  | 0.253781483 | 1.49E-07 | Cyto_CD8.T_GZMB_GNLY_TMPO |
| PARK7    | 0.385219092 | 1.65E-07 | Cyto_CD8.T_GZMB_GNLY_TMPO |
| APOBEC3G | 0.438276681 | 1.69E-07 | Cyto_CD8.T_GZMB_GNLY_TMPO |
| USP14    | 0.283775016 | 1.71E-07 | Cyto_CD8.T_GZMB_GNLY_TMPO |
| TRAPPC2L | 0.267085509 | 1.97E-07 | Cyto_CD8.T_GZMB_GNLY_TMPO |
| TMOD3    | 0.306148169 | 1.97E-07 | Cyto_CD8.T_GZMB_GNLY_TMPO |
| RAD23A   | 0.336180521 | 2.07E-07 | Cyto_CD8.T_GZMB_GNLY_TMPO |
| FUBP1    | 0.280277804 | 2.10E-07 | Cyto_CD8.T_GZMB_GNLY_TMPO |
| SUMO3    | 0.313930547 | 2.18E-07 | Cyto_CD8.T_GZMB_GNLY_TMPO |
| DOCK8    | 0.313864428 | 2.82E-07 | Cyto_CD8.T_GZMB_GNLY_TMPO |
| C12orf65 | 0.265535598 | 2.86E-07 | Cyto_CD8.T_GZMB_GNLY_TMPO |

|          |             |          |                           |
|----------|-------------|----------|---------------------------|
| VDAC2    | 0.317039083 | 3.03E-07 | Cyto_CD8.T_GZMB_GNLY_TMPO |
| ZFAND2B  | 0.284848767 | 3.32E-07 | Cyto_CD8.T_GZMB_GNLY_TMPO |
| NDUFA6   | 0.359230007 | 3.34E-07 | Cyto_CD8.T_GZMB_GNLY_TMPO |
| DAXX     | 0.263099674 | 3.45E-07 | Cyto_CD8.T_GZMB_GNLY_TMPO |
| BCLAF1   | 0.330317315 | 3.56E-07 | Cyto_CD8.T_GZMB_GNLY_TMPO |
| PAXBP1   | 0.253572938 | 3.73E-07 | Cyto_CD8.T_GZMB_GNLY_TMPO |
| RASSF1   | 0.322271427 | 4.55E-07 | Cyto_CD8.T_GZMB_GNLY_TMPO |
| SMARCD1  | 0.253746772 | 4.71E-07 | Cyto_CD8.T_GZMB_GNLY_TMPO |
| IFI27L2  | 0.300115524 | 4.82E-07 | Cyto_CD8.T_GZMB_GNLY_TMPO |
| WDR1     | 0.339646367 | 5.01E-07 | Cyto_CD8.T_GZMB_GNLY_TMPO |
| UBXN4    | 0.348263743 | 5.41E-07 | Cyto_CD8.T_GZMB_GNLY_TMPO |
| IPO7     | 0.254791533 | 5.54E-07 | Cyto_CD8.T_GZMB_GNLY_TMPO |
| SRSF1    | 0.318245977 | 5.71E-07 | Cyto_CD8.T_GZMB_GNLY_TMPO |
| GMCL1    | 0.268036993 | 5.72E-07 | Cyto_CD8.T_GZMB_GNLY_TMPO |
| CNOT1    | 0.257932253 | 5.86E-07 | Cyto_CD8.T_GZMB_GNLY_TMPO |
| ZC3H18   | 0.272261467 | 5.88E-07 | Cyto_CD8.T_GZMB_GNLY_TMPO |
| PCBP1    | 0.34811128  | 6.55E-07 | Cyto_CD8.T_GZMB_GNLY_TMPO |
| LRRCS9   | 0.271682285 | 7.02E-07 | Cyto_CD8.T_GZMB_GNLY_TMPO |
| PSMB1    | 0.393946212 | 7.84E-07 | Cyto_CD8.T_GZMB_GNLY_TMPO |
| SLC25A11 | 0.25750903  | 7.84E-07 | Cyto_CD8.T_GZMB_GNLY_TMPO |
| RNF167   | 0.327960632 | 8.10E-07 | Cyto_CD8.T_GZMB_GNLY_TMPO |
| LSM6     | 0.267533555 | 8.17E-07 | Cyto_CD8.T_GZMB_GNLY_TMPO |
| SH2D1A   | 0.453986017 | 8.21E-07 | Cyto_CD8.T_GZMB_GNLY_TMPO |
| PSMC5    | 0.296879759 | 8.22E-07 | Cyto_CD8.T_GZMB_GNLY_TMPO |
| PRPF8    | 0.306380536 | 8.63E-07 | Cyto_CD8.T_GZMB_GNLY_TMPO |
| MPC2     | 0.310093608 | 8.68E-07 | Cyto_CD8.T_GZMB_GNLY_TMPO |
| TP53     | 0.251426406 | 8.72E-07 | Cyto_CD8.T_GZMB_GNLY_TMPO |
| MYO1G    | 0.307513217 | 8.83E-07 | Cyto_CD8.T_GZMB_GNLY_TMPO |
| COPE     | 0.325574195 | 9.01E-07 | Cyto_CD8.T_GZMB_GNLY_TMPO |
| ITGB1BP1 | 0.288240456 | 9.19E-07 | Cyto_CD8.T_GZMB_GNLY_TMPO |
| ILK      | 0.285639219 | 9.50E-07 | Cyto_CD8.T_GZMB_GNLY_TMPO |
| UBE2D2   | 0.349019006 | 9.56E-07 | Cyto_CD8.T_GZMB_GNLY_TMPO |
| ANAPC5   | 0.302869174 | 1.04E-06 | Cyto_CD8.T_GZMB_GNLY_TMPO |
| LEO1     | 0.25434214  | 1.04E-06 | Cyto_CD8.T_GZMB_GNLY_TMPO |
| SLC25A3  | 0.348094108 | 1.10E-06 | Cyto_CD8.T_GZMB_GNLY_TMPO |
| PSMA7    | 0.403335944 | 1.30E-06 | Cyto_CD8.T_GZMB_GNLY_TMPO |
| MRPL57   | 0.355530872 | 1.33E-06 | Cyto_CD8.T_GZMB_GNLY_TMPO |
| UBN1     | 0.283439303 | 1.38E-06 | Cyto_CD8.T_GZMB_GNLY_TMPO |
| DECR1    | 0.286055657 | 1.47E-06 | Cyto_CD8.T_GZMB_GNLY_TMPO |
| CHRAC1   | 0.266644172 | 1.60E-06 | Cyto_CD8.T_GZMB_GNLY_TMPO |
| UQCRC1   | 0.259927987 | 1.61E-06 | Cyto_CD8.T_GZMB_GNLY_TMPO |
| ATP5MF   | 0.41615711  | 1.64E-06 | Cyto_CD8.T_GZMB_GNLY_TMPO |
| SNRNP200 | 0.331728762 | 1.66E-06 | Cyto_CD8.T_GZMB_GNLY_TMPO |
| TECR     | 0.269841183 | 1.67E-06 | Cyto_CD8.T_GZMB_GNLY_TMPO |
| OSBP18   | 0.301482758 | 1.69E-06 | Cyto_CD8.T_GZMB_GNLY_TMPO |
| SEC11A   | 0.31505748  | 1.70E-06 | Cyto_CD8.T_GZMB_GNLY_TMPO |
| RTF1     | 0.277910425 | 1.71E-06 | Cyto_CD8.T_GZMB_GNLY_TMPO |
| SNX10    | 0.294628246 | 1.74E-06 | Cyto_CD8.T_GZMB_GNLY_TMPO |
| ARL6IP4  | 0.355365803 | 1.99E-06 | Cyto_CD8.T_GZMB_GNLY_TMPO |
| DGUOK    | 0.283465936 | 2.10E-06 | Cyto_CD8.T_GZMB_GNLY_TMPO |
| MDH1     | 0.323084557 | 2.36E-06 | Cyto_CD8.T_GZMB_GNLY_TMPO |
| ATP5PB   | 0.293362229 | 2.82E-06 | Cyto_CD8.T_GZMB_GNLY_TMPO |
| PSMA2    | 0.40536345  | 2.83E-06 | Cyto_CD8.T_GZMB_GNLY_TMPO |
| HNRNPA0  | 0.350322333 | 3.03E-06 | Cyto_CD8.T_GZMB_GNLY_TMPO |
| POLR2A   | 0.331689551 | 3.22E-06 | Cyto_CD8.T_GZMB_GNLY_TMPO |
| MYL12B   | 0.347776822 | 3.27E-06 | Cyto_CD8.T_GZMB_GNLY_TMPO |
| ADD3     | 0.35342856  | 3.31E-06 | Cyto_CD8.T_GZMB_GNLY_TMPO |
| TMSB10   | 0.357512969 | 3.88E-06 | Cyto_CD8.T_GZMB_GNLY_TMPO |
| SMARCE1  | 0.280889319 | 4.00E-06 | Cyto_CD8.T_GZMB_GNLY_TMPO |
| HADHA    | 0.27249852  | 4.14E-06 | Cyto_CD8.T_GZMB_GNLY_TMPO |
| NDUFS3   | 0.275819286 | 4.54E-06 | Cyto_CD8.T_GZMB_GNLY_TMPO |
| NSD3     | 0.325801546 | 4.72E-06 | Cyto_CD8.T_GZMB_GNLY_TMPO |
| LUC7L3   | 0.355449907 | 4.74E-06 | Cyto_CD8.T_GZMB_GNLY_TMPO |
| NDUFA4   | 0.372647844 | 4.93E-06 | Cyto_CD8.T_GZMB_GNLY_TMPO |



|          |             |          |                           |
|----------|-------------|----------|---------------------------|
| XRCC6    | 0.308628877 | 5.43E-06 | Cyto_CD8.T_GZMB_GNLY_TMPO |
| DNAJC1   | 0.362516197 | 5.59E-06 | Cyto_CD8.T_GZMB_GNLY_TMPO |
| GSTP1    | 0.746111591 | 5.73E-06 | Cyto_CD8.T_GZMB_GNLY_TMPO |
| ANP32A   | 0.382081222 | 6.13E-06 | Cyto_CD8.T_GZMB_GNLY_TMPO |
| SRSF11   | 0.358284752 | 6.25E-06 | Cyto_CD8.T_GZMB_GNLY_TMPO |
| POLR2G   | 0.30675346  | 6.39E-06 | Cyto_CD8.T_GZMB_GNLY_TMPO |
| RNF126   | 0.292243873 | 6.64E-06 | Cyto_CD8.T_GZMB_GNLY_TMPO |
| GRK6     | 0.266767683 | 6.69E-06 | Cyto_CD8.T_GZMB_GNLY_TMPO |
| SEM1     | 0.336909363 | 6.75E-06 | Cyto_CD8.T_GZMB_GNLY_TMPO |
| CEP350   | 0.328227067 | 6.81E-06 | Cyto_CD8.T_GZMB_GNLY_TMPO |
| DIAPH1   | 0.382668317 | 7.32E-06 | Cyto_CD8.T_GZMB_GNLY_TMPO |
| PARP14   | 0.330457802 | 7.68E-06 | Cyto_CD8.T_GZMB_GNLY_TMPO |
| IDH3G    | 0.27863286  | 7.91E-06 | Cyto_CD8.T_GZMB_GNLY_TMPO |
| ANXA5    | 0.434109962 | 8.01E-06 | Cyto_CD8.T_GZMB_GNLY_TMPO |
| MT-ND6   | 0.304595707 | 8.24E-06 | Cyto_CD8.T_GZMB_GNLY_TMPO |
| ADRM1    | 0.343258282 | 8.72E-06 | Cyto_CD8.T_GZMB_GNLY_TMPO |
| MIEN1    | 0.283754359 | 9.60E-06 | Cyto_CD8.T_GZMB_GNLY_TMPO |
| TRDC     | 0.701672149 | 9.76E-06 | Cyto_CD8.T_GZMB_GNLY_TMPO |
| EIF4E2   | 0.251020974 | 1.02E-05 | Cyto_CD8.T_GZMB_GNLY_TMPO |
| TPM4     | 0.35696272  | 1.07E-05 | Cyto_CD8.T_GZMB_GNLY_TMPO |
| AKT1     | 0.275796778 | 1.10E-05 | Cyto_CD8.T_GZMB_GNLY_TMPO |
| SNRPE    | 0.357173268 | 1.29E-05 | Cyto_CD8.T_GZMB_GNLY_TMPO |
| ZC3H13   | 0.313599229 | 1.31E-05 | Cyto_CD8.T_GZMB_GNLY_TMPO |
| STX11    | 0.327391424 | 1.36E-05 | Cyto_CD8.T_GZMB_GNLY_TMPO |
| ARHGDI1A | 0.321021324 | 1.38E-05 | Cyto_CD8.T_GZMB_GNLY_TMPO |
| CCT8     | 0.330859047 | 1.42E-05 | Cyto_CD8.T_GZMB_GNLY_TMPO |
| SRRT     | 0.258188918 | 1.42E-05 | Cyto_CD8.T_GZMB_GNLY_TMPO |
| PCMT1    | 0.301951757 | 1.49E-05 | Cyto_CD8.T_GZMB_GNLY_TMPO |
| PABPN1   | 0.290777659 | 1.52E-05 | Cyto_CD8.T_GZMB_GNLY_TMPO |
| PHIP     | 0.320247019 | 1.59E-05 | Cyto_CD8.T_GZMB_GNLY_TMPO |
| KRT10    | 0.286704096 | 1.62E-05 | Cyto_CD8.T_GZMB_GNLY_TMPO |
| SMARCC1  | 0.257592548 | 1.67E-05 | Cyto_CD8.T_GZMB_GNLY_TMPO |
| RAB27A   | 0.275964991 | 1.77E-05 | Cyto_CD8.T_GZMB_GNLY_TMPO |
| COX7A2   | 0.35447441  | 2.04E-05 | Cyto_CD8.T_GZMB_GNLY_TMPO |
| LMF2     | 0.255581106 | 2.22E-05 | Cyto_CD8.T_GZMB_GNLY_TMPO |
| PPP1CC   | 0.259172633 | 2.22E-05 | Cyto_CD8.T_GZMB_GNLY_TMPO |
| PSMB10   | 0.346654052 | 2.35E-05 | Cyto_CD8.T_GZMB_GNLY_TMPO |
| PSMA3    | 0.321467358 | 2.35E-05 | Cyto_CD8.T_GZMB_GNLY_TMPO |
| C1orf21  | 0.31807476  | 2.54E-05 | Cyto_CD8.T_GZMB_GNLY_TMPO |
| PSMA5    | 0.329005621 | 2.60E-05 | Cyto_CD8.T_GZMB_GNLY_TMPO |
| HIPK1    | 0.285243269 | 2.70E-05 | Cyto_CD8.T_GZMB_GNLY_TMPO |
| NDUFA12  | 0.350603515 | 2.71E-05 | Cyto_CD8.T_GZMB_GNLY_TMPO |
| CHD3     | 0.279598868 | 3.10E-05 | Cyto_CD8.T_GZMB_GNLY_TMPO |
| ATP5PF   | 0.352421567 | 3.38E-05 | Cyto_CD8.T_GZMB_GNLY_TMPO |
| SPAG9    | 0.282225491 | 3.56E-05 | Cyto_CD8.T_GZMB_GNLY_TMPO |
| PSMB4    | 0.305173003 | 3.65E-05 | Cyto_CD8.T_GZMB_GNLY_TMPO |
| CCAR1    | 0.277875707 | 3.71E-05 | Cyto_CD8.T_GZMB_GNLY_TMPO |
| COX17    | 0.327227369 | 3.88E-05 | Cyto_CD8.T_GZMB_GNLY_TMPO |
| EIF2S3   | 0.282562239 | 3.91E-05 | Cyto_CD8.T_GZMB_GNLY_TMPO |
| ATP5PO   | 0.296171114 | 3.96E-05 | Cyto_CD8.T_GZMB_GNLY_TMPO |
| GBP4     | 0.373167501 | 4.00E-05 | Cyto_CD8.T_GZMB_GNLY_TMPO |
| ARPC3    | 0.304998192 | 4.01E-05 | Cyto_CD8.T_GZMB_GNLY_TMPO |
| CNPY3    | 0.277099898 | 4.24E-05 | Cyto_CD8.T_GZMB_GNLY_TMPO |
| RSRC2    | 0.289194237 | 4.49E-05 | Cyto_CD8.T_GZMB_GNLY_TMPO |
| GNB2     | 0.332879821 | 4.74E-05 | Cyto_CD8.T_GZMB_GNLY_TMPO |
| CTDSP1   | 0.254677129 | 4.75E-05 | Cyto_CD8.T_GZMB_GNLY_TMPO |
| NUDT5    | 0.277391758 | 5.52E-05 | Cyto_CD8.T_GZMB_GNLY_TMPO |
| RPSA     | 0.314744126 | 5.67E-05 | Cyto_CD8.T_GZMB_GNLY_TMPO |
| GNAI2    | 0.339168788 | 5.75E-05 | Cyto_CD8.T_GZMB_GNLY_TMPO |
| ATP5F1A  | 0.283537822 | 6.01E-05 | Cyto_CD8.T_GZMB_GNLY_TMPO |
| RNPS1    | 0.323703372 | 6.02E-05 | Cyto_CD8.T_GZMB_GNLY_TMPO |
| ABRACL   | 0.359245441 | 6.33E-05 | Cyto_CD8.T_GZMB_GNLY_TMPO |
| SNW1     | 0.256678094 | 6.58E-05 | Cyto_CD8.T_GZMB_GNLY_TMPO |
| MAP2K3   | 0.25723985  | 7.28E-05 | Cyto_CD8.T_GZMB_GNLY_TMPO |

|          |             |             |                           |
|----------|-------------|-------------|---------------------------|
| NBN      | 0.257418596 | 7.31E-05    | Cyto_CD8.T_GZMB_GNLY_TMPO |
| STOML2   | 0.277275547 | 7.54E-05    | Cyto_CD8.T_GZMB_GNLY_TMPO |
| PITHD1   | 0.29682055  | 8.28E-05    | Cyto_CD8.T_GZMB_GNLY_TMPO |
| C1D      | 0.258966556 | 8.37E-05    | Cyto_CD8.T_GZMB_GNLY_TMPO |
| CDK2AP2  | 0.389344627 | 8.61E-05    | Cyto_CD8.T_GZMB_GNLY_TMPO |
| CD70     | 0.484096218 | 8.72E-05    | Cyto_CD8.T_GZMB_GNLY_TMPO |
| LNPEP    | 0.258362813 | 9.16E-05    | Cyto_CD8.T_GZMB_GNLY_TMPO |
| CAPZA1   | 0.29498925  | 0.000103994 | Cyto_CD8.T_GZMB_GNLY_TMPO |
| SRSF2    | 0.3530157   | 0.000105248 | Cyto_CD8.T_GZMB_GNLY_TMPO |
| GTF2A2   | 0.270148096 | 0.000120533 | Cyto_CD8.T_GZMB_GNLY_TMPO |
| NDUFV2   | 0.315466688 | 0.000121286 | Cyto_CD8.T_GZMB_GNLY_TMPO |
| ATP5MPL  | 0.29024753  | 0.000126965 | Cyto_CD8.T_GZMB_GNLY_TMPO |
| CCT3     | 0.292461951 | 0.000128444 | Cyto_CD8.T_GZMB_GNLY_TMPO |
| BCL7B    | 0.286696928 | 0.000130882 | Cyto_CD8.T_GZMB_GNLY_TMPO |
| YY1      | 0.313984713 | 0.000133443 | Cyto_CD8.T_GZMB_GNLY_TMPO |
| NUTF2    | 0.276789521 | 0.000134026 | Cyto_CD8.T_GZMB_GNLY_TMPO |
| EMB      | 0.322772548 | 0.000135766 | Cyto_CD8.T_GZMB_GNLY_TMPO |
| UBE2M    | 0.27051056  | 0.000136821 | Cyto_CD8.T_GZMB_GNLY_TMPO |
| TMEM109  | 0.280329896 | 0.000141311 | Cyto_CD8.T_GZMB_GNLY_TMPO |
| SRP14    | 0.265814192 | 0.000149551 | Cyto_CD8.T_GZMB_GNLY_TMPO |
| HSPA8    | 0.33328879  | 0.000151889 | Cyto_CD8.T_GZMB_GNLY_TMPO |
| STK24    | 0.261862075 | 0.000180469 | Cyto_CD8.T_GZMB_GNLY_TMPO |
| CCT5     | 0.287370962 | 0.000186244 | Cyto_CD8.T_GZMB_GNLY_TMPO |
| STARD3NL | 0.337837072 | 0.000187231 | Cyto_CD8.T_GZMB_GNLY_TMPO |
| ATP5IF1  | 0.357103482 | 0.000198364 | Cyto_CD8.T_GZMB_GNLY_TMPO |
| ANKRD10  | 0.261985733 | 0.000205663 | Cyto_CD8.T_GZMB_GNLY_TMPO |
| MED4     | 0.263536725 | 0.000255899 | Cyto_CD8.T_GZMB_GNLY_TMPO |
| BRK1     | 0.289174692 | 0.000257066 | Cyto_CD8.T_GZMB_GNLY_TMPO |
| TEX264   | 0.276776826 | 0.000264604 | Cyto_CD8.T_GZMB_GNLY_TMPO |
| TIAL1    | 0.252456216 | 0.000281351 | Cyto_CD8.T_GZMB_GNLY_TMPO |
| MSN      | 0.328241363 | 0.000299961 | Cyto_CD8.T_GZMB_GNLY_TMPO |
| PSMD11   | 0.267575991 | 0.000304021 | Cyto_CD8.T_GZMB_GNLY_TMPO |
| HNRNPK   | 0.28385948  | 0.000304147 | Cyto_CD8.T_GZMB_GNLY_TMPO |
| TAP1     | 0.308189778 | 0.000323973 | Cyto_CD8.T_GZMB_GNLY_TMPO |
| ACIN1    | 0.291031416 | 0.000343623 | Cyto_CD8.T_GZMB_GNLY_TMPO |
| SVIP     | 0.276720259 | 0.000350537 | Cyto_CD8.T_GZMB_GNLY_TMPO |
| TIFA     | 0.299438573 | 0.000381368 | Cyto_CD8.T_GZMB_GNLY_TMPO |
| SLC20A1  | 0.283330939 | 0.000395821 | Cyto_CD8.T_GZMB_GNLY_TMPO |
| GNAS     | 0.28747213  | 0.000417521 | Cyto_CD8.T_GZMB_GNLY_TMPO |
| MESD     | 0.264144185 | 0.000468198 | Cyto_CD8.T_GZMB_GNLY_TMPO |
| NDUFB11  | 0.329453069 | 0.000476392 | Cyto_CD8.T_GZMB_GNLY_TMPO |
| S1PR4    | 0.27948342  | 0.000492232 | Cyto_CD8.T_GZMB_GNLY_TMPO |
| HINT1    | 0.281786343 | 0.00050798  | Cyto_CD8.T_GZMB_GNLY_TMPO |
| PTGES3   | 0.286500393 | 0.000516735 | Cyto_CD8.T_GZMB_GNLY_TMPO |
| POMP     | 0.301821846 | 0.000517661 | Cyto_CD8.T_GZMB_GNLY_TMPO |
| BRD2     | 0.324666303 | 0.000542427 | Cyto_CD8.T_GZMB_GNLY_TMPO |
| HNRNPU   | 0.366559387 | 0.000568782 | Cyto_CD8.T_GZMB_GNLY_TMPO |
| MT-CO3   | 0.30737517  | 0.000727097 | Cyto_CD8.T_GZMB_GNLY_TMPO |
| HNRNPC   | 0.31700766  | 0.000746084 | Cyto_CD8.T_GZMB_GNLY_TMPO |
| CSNK2B   | 0.317992885 | 0.000778583 | Cyto_CD8.T_GZMB_GNLY_TMPO |
| PSME1    | 0.30310741  | 0.00080462  | Cyto_CD8.T_GZMB_GNLY_TMPO |
| SSBP1    | 0.266812544 | 0.001018667 | Cyto_CD8.T_GZMB_GNLY_TMPO |
| TXN      | 0.473512717 | 0.001086365 | Cyto_CD8.T_GZMB_GNLY_TMPO |
| PSMB7    | 0.25857139  | 0.001115598 | Cyto_CD8.T_GZMB_GNLY_TMPO |
| G3BP1    | 0.262247338 | 0.00123863  | Cyto_CD8.T_GZMB_GNLY_TMPO |
| MRPS6    | 0.272543446 | 0.001295136 | Cyto_CD8.T_GZMB_GNLY_TMPO |
| YWHAE    | 0.296955457 | 0.001316429 | Cyto_CD8.T_GZMB_GNLY_TMPO |
| CCT2     | 0.28189545  | 0.001404302 | Cyto_CD8.T_GZMB_GNLY_TMPO |
| NPM1     | 0.378761347 | 0.001455595 | Cyto_CD8.T_GZMB_GNLY_TMPO |
| PRPF4B   | 0.261118886 | 0.001581937 | Cyto_CD8.T_GZMB_GNLY_TMPO |
| AURKAIP1 | 0.256279615 | 0.001603745 | Cyto_CD8.T_GZMB_GNLY_TMPO |
| SF3B1    | 0.286785571 | 0.001670477 | Cyto_CD8.T_GZMB_GNLY_TMPO |
| UXT      | 0.270936653 | 0.001813072 | Cyto_CD8.T_GZMB_GNLY_TMPO |
| SPCS2    | 0.267533555 | 0.001823659 | Cyto_CD8.T_GZMB_GNLY_TMPO |

|          |             |             |                           |
|----------|-------------|-------------|---------------------------|
| WASF2    | 0.262163351 | 0.001872965 | Cyto_CD8.T_GZMB_GNLY_TMPO |
| HIPK2    | 0.267767886 | 0.001877008 | Cyto_CD8.T_GZMB_GNLY_TMPO |
| ARRB2    | 0.262658527 | 0.001882969 | Cyto_CD8.T_GZMB_GNLY_TMPO |
| ATP5MC2  | 0.265295008 | 0.002044144 | Cyto_CD8.T_GZMB_GNLY_TMPO |
| SLC38A2  | 0.304141972 | 0.002103123 | Cyto_CD8.T_GZMB_GNLY_TMPO |
| SNHG7    | 0.252365306 | 0.002156567 | Cyto_CD8.T_GZMB_GNLY_TMPO |
| BIN2     | 0.318429403 | 0.002194802 | Cyto_CD8.T_GZMB_GNLY_TMPO |
| EIF3A    | 0.358050293 | 0.002232057 | Cyto_CD8.T_GZMB_GNLY_TMPO |
| ROCK1    | 0.271165501 | 0.002535067 | Cyto_CD8.T_GZMB_GNLY_TMPO |
| UQCR10   | 0.288764311 | 0.002553297 | Cyto_CD8.T_GZMB_GNLY_TMPO |
| COX7B    | 0.271130767 | 0.002586938 | Cyto_CD8.T_GZMB_GNLY_TMPO |
| OSTF1    | 0.269093845 | 0.002687872 | Cyto_CD8.T_GZMB_GNLY_TMPO |
| SAFB     | 0.261558052 | 0.00295396  | Cyto_CD8.T_GZMB_GNLY_TMPO |
| KLF3     | 0.271047993 | 0.003567359 | Cyto_CD8.T_GZMB_GNLY_TMPO |
| AIP      | 0.296053152 | 0.003775684 | Cyto_CD8.T_GZMB_GNLY_TMPO |
| NUDC     | 0.258910556 | 0.003843424 | Cyto_CD8.T_GZMB_GNLY_TMPO |
| MT-ND4   | 0.268027733 | 0.003906405 | Cyto_CD8.T_GZMB_GNLY_TMPO |
| RBM3     | 0.270060526 | 0.004117291 | Cyto_CD8.T_GZMB_GNLY_TMPO |
| ANXA6    | 0.256159827 | 0.004308788 | Cyto_CD8.T_GZMB_GNLY_TMPO |
| TCEA1    | 0.256298461 | 0.004588698 | Cyto_CD8.T_GZMB_GNLY_TMPO |
| PMAIP1   | 0.270908317 | 0.004594397 | Cyto_CD8.T_GZMB_GNLY_TMPO |
| BAZ1A    | 0.277133802 | 0.004930063 | Cyto_CD8.T_GZMB_GNLY_TMPO |
| TUFM     | 0.263685575 | 0.005057672 | Cyto_CD8.T_GZMB_GNLY_TMPO |
| MT-CYB   | 0.264437929 | 0.005400758 | Cyto_CD8.T_GZMB_GNLY_TMPO |
| DNAJC7   | 0.26284547  | 0.005711802 | Cyto_CD8.T_GZMB_GNLY_TMPO |
| PPP1R12A | 0.277063786 | 0.005801602 | Cyto_CD8.T_GZMB_GNLY_TMPO |
| SAP18    | 0.262764938 | 0.005833264 | Cyto_CD8.T_GZMB_GNLY_TMPO |
| LY6E     | 0.311951703 | 0.005871081 | Cyto_CD8.T_GZMB_GNLY_TMPO |
| WAC      | 0.258116836 | 0.005974767 | Cyto_CD8.T_GZMB_GNLY_TMPO |
| BSG      | 0.252218518 | 0.00629924  | Cyto_CD8.T_GZMB_GNLY_TMPO |
| SLC2A4RG | 0.270183945 | 0.006642911 | Cyto_CD8.T_GZMB_GNLY_TMPO |
| PRPF38B  | 0.255075067 | 0.007360161 | Cyto_CD8.T_GZMB_GNLY_TMPO |
| CALM1    | 0.250004383 | 0.007594067 | Cyto_CD8.T_GZMB_GNLY_TMPO |
| RBM26    | 0.263892799 | 0.00780141  | Cyto_CD8.T_GZMB_GNLY_TMPO |
| SSR2     | 0.266769837 | 0.008742707 | Cyto_CD8.T_GZMB_GNLY_TMPO |
| MAP3K8   | 0.334410861 | 0.008959553 | Cyto_CD8.T_GZMB_GNLY_TMPO |
| RPP21    | 0.259836933 | 0.009266228 | Cyto_CD8.T_GZMB_GNLY_TMPO |
| SUMO1    | 0.257272523 | 0.009444772 | Cyto_CD8.T_GZMB_GNLY_TMPO |

#### c.Cyto\_CD8.T\_RGS1

| Gene symbol | avg_log2FC  | p_val_adj | Upregulated group | Description                                            | pvalue      | geneID                                          | Count |
|-------------|-------------|-----------|-------------------|--------------------------------------------------------|-------------|-------------------------------------------------|-------|
| CCL4L2      | 1.516114392 | 2.69E-132 | Cyto_CD8.T_RGS1   | Antigen processing and presentation                    | 1.19E-07    | CD8A/CD8B/CD74/HLA-DPA1/HLA-DQA1/HLA-DRB1/HSPA8 | 7     |
| CD8B        | 0.707420611 | 3.43E-91  | Cyto_CD8.T_RGS1   | Th1 and Th2 cell differentiation                       | 3.74E-07    | CD3D/CD3E/FOS/HLA-DPA1/HLA-DQA1/HLA-DRB1/LCK    | 7     |
| CD3E        | 0.56174146  | 2.80E-83  | Cyto_CD8.T_RGS1   | Hematopoietic cell lineage                             | 6.19E-07    | CD3D/CD3E/CD8A/CD8B/HLA-DPA1/HLA-DQA1/HLA-DRB1  | 7     |
| CCL4        | 1.011888595 | 3.48E-79  | Cyto_CD8.T_RGS1   | Th17 cell differentiation                              | 1.12E-06    | CD3D/CD3E/FOS/HLA-DPA1/HLA-DQA1/HLA-DRB1/LCK    | 7     |
| DUSP2       | 0.528556696 | 3.34E-73  | Cyto_CD8.T_RGS1   | Primary immunodeficiency                               | 1.29E-06    | CD3D/CD3E/CD8A/CD8B/LCK                         | 5     |
| CD3D        | 0.478397311 | 7.63E-63  | Cyto_CD8.T_RGS1   | T cell receptor signaling pathway                      | 1.38E-05    | CD3D/CD3E/CD8A/CD8B/FOS/LCK                     | 6     |
| JUND        | 0.388401729 | 1.24E-54  | Cyto_CD8.T_RGS1   | Rheumatoid arthritis                                   | 0.000108085 | FOS/HLA-DPA1/HLA-DQA1/HLA-DRB1/CCL5             | 5     |
| CD8A        | 0.491294937 | 1.80E-54  | Cyto_CD8.T_RGS1   | Phagosome                                              | 0.000117753 | ACTB/HLA-DPA1/HLA-DQA1/HLA-DRB1/TUBA4A/TUBA1A   | 6     |
| GZMK        | 0.578533019 | 5.13E-52  | Cyto_CD8.T_RGS1   | Human T-cell leukemia virus 1 infection                | 0.000124649 | CD3D/CD3E/FOS/HLA-DPA1/HLA-DQA1/HLA-DRB1/LCK    | 7     |
| ZFP36L2     | 0.585546155 | 6.50E-52  | Cyto_CD8.T_RGS1   | Influenza A                                            | 0.000224485 | ACTB/HLA-DPA1/HLA-DQA1/HLA-DRB1/DNAJB1/CCL5     | 6     |
| SARAF       | 0.481852176 | 2.48E-51  | Cyto_CD8.T_RGS1   | Viral myocarditis                                      | 0.000245271 | ACTB/HLA-DPA1/HLA-DQA1/HLA-DRB1                 | 4     |
| TRAC        | 0.591519897 | 4.34E-49  | Cyto_CD8.T_RGS1   | Osteoclast differentiation                             | 0.000481595 | FOS/FOSB/JUNB/JUND/LCK                          | 5     |
| RGCC        | 0.792728844 | 3.46E-48  | Cyto_CD8.T_RGS1   | Asthma                                                 | 0.00052431  | HLA-DPA1/HLA-DQA1/HLA-DRB1                      | 3     |
| IL32        | 0.427211654 | 1.44E-44  | Cyto_CD8.T_RGS1   | Epstein-Barr virus infection                           | 0.000549227 | CD3D/CD3E/HLA-DPA1/HLA-DQA1/HLA-DRB1/VIM        | 6     |
| COTL1       | 0.554272244 | 7.70E-43  | Cyto_CD8.T_RGS1   | Apoptosis                                              | 0.000635552 | ACTB/FOS/MCL1/TUBA4A/TUBA1A                     | 5     |
| ARHGDI3     | 0.456275044 | 2.59E-41  | Cyto_CD8.T_RGS1   | Leishmaniasis                                          | 0.000638725 | FOS/HLA-DPA1/HLA-DQA1/HLA-DRB1                  | 4     |
| GAPDH       | 0.469099003 | 2.30E-39  | Cyto_CD8.T_RGS1   | Yersinia infection                                     | 0.000657121 | ACTB/CD8A/CD8B/FOS/LCK                          | 5     |
| RPS26       | 0.297710153 | 3.77E-39  | Cyto_CD8.T_RGS1   | MAPK signaling pathway                                 | 0.000692266 | DUSP1/DUSP2/DUSP4/DUSP5/FOS/HSPA8/JUND          | 7     |
| SAMSN1      | 0.513920316 | 1.96E-37  | Cyto_CD8.T_RGS1   | Allograft rejection                                    | 0.000959536 | HLA-DPA1/HLA-DQA1/HLA-DRB1                      | 3     |
| TNFSF9      | 0.487997105 | 3.55E-37  | Cyto_CD8.T_RGS1   | Cell adhesion molecules                                | 0.000961079 | CD8A/CD8B/HLA-DPA1/HLA-DQA1/HLA-DRB1            | 5     |
| ATP5F1E     | 0.289107853 | 5.25E-37  | Cyto_CD8.T_RGS1   | PD-L1 expression and PD-1 checkpoint pathway in cancer | 0.001101862 | CD3D/CD3E/FOS/LCK                               | 4     |
| LAG3        | 0.337458325 | 6.92E-36  | Cyto_CD8.T_RGS1   | Graft-versus-host disease                              | 0.001287134 | HLA-DPA1/HLA-DQA1/HLA-DRB1                      | 3     |

|          |             |          |                 |                                                               |             |                                             |   |
|----------|-------------|----------|-----------------|---------------------------------------------------------------|-------------|---------------------------------------------|---|
| LEPROTL1 | 0.533235703 | 2.11E-35 | Cyto_CD8.T_RGS1 | Type I diabetes mellitus                                      | 0.001378707 | HLA-DPA1/HLA-DQA1/HLA-DRB1                  | 3 |
| VIM      | 0.449415916 | 4.99E-35 | Cyto_CD8.T_RGS1 | Chagas disease                                                | 0.001826878 | CD3D/CD3E/FOS/CCL5                          | 4 |
| HLA-DRB1 | 0.350357007 | 3.75E-33 | Cyto_CD8.T_RGS1 | Toll-like receptor signaling pathway                          | 0.001962018 | FOS/CCL4/CCL5/CCL4L2                        | 4 |
| UBC      | 0.344847852 | 4.36E-32 | Cyto_CD8.T_RGS1 | Intestinal immune network for IgA production                  | 0.002014421 | HLA-DPA1/HLA-DQA1/HLA-DRB1                  | 3 |
| ITM2A    | 0.444493498 | 5.08E-32 | Cyto_CD8.T_RGS1 | Autoimmune thyroid disease                                    | 0.002524831 | HLA-DPA1/HLA-DQA1/HLA-DRB1                  | 3 |
| TRBC2    | 0.582184215 | 7.44E-32 | Cyto_CD8.T_RGS1 | Toxoplasmosis                                                 | 0.002572221 | HLA-DPA1/HLA-DQA1/HLA-DRB1/HSPA8            | 4 |
| HLA-DQA1 | 0.37240594  | 1.36E-29 | Cyto_CD8.T_RGS1 | Pathogenic Escherichia coli infection                         | 0.003289687 | ACTB/FOS/GAPDH/TUBA4A/TUBA1A                | 5 |
| DUSP5    | 0.546523432 | 4.40E-29 | Cyto_CD8.T_RGS1 | Cytokine-cytokine receptor interaction                        | 0.003821411 | CCL4/CCL5/TNFSF9/IL32/CCL4L2/CXCR6          | 6 |
| CCL5     | 0.300196965 | 4.72E-29 | Cyto_CD8.T_RGS1 | Cytosolic DNA-sensing pathway                                 | 0.004129356 | CCL4/CCL5/CCL4L2                            | 3 |
| CXCR6    | 0.483824097 | 9.25E-28 | Cyto_CD8.T_RGS1 | Inflammatory bowel disease                                    | 0.004509668 | HLA-DPA1/HLA-DQA1/HLA-DRB1                  | 3 |
| DUSP4    | 0.311200323 | 8.32E-27 | Cyto_CD8.T_RGS1 | Measles                                                       | 0.005577136 | CD3D/CD3E/FOS/HSPA8                         | 4 |
| OAZ1     | 0.284749377 | 1.54E-26 | Cyto_CD8.T_RGS1 | PPAR signaling pathway                                        | 0.006726578 | APOA2/FABP5/UBC                             | 3 |
| APOA2    | 0.465729288 | 7.75E-26 | Cyto_CD8.T_RGS1 | Salmonella infection                                          | 0.008806013 | ACTB/FOS/GAPDH/TUBA4A/TUBA1A                | 5 |
| FABP5    | 0.42488134  | 5.27E-23 | Cyto_CD8.T_RGS1 | Parkinson disease                                             | 0.011516845 | ATP5F1E/DUSP1/TUBA4A/UBC/TUBA1A             | 5 |
| ACTB     | 0.2830964   | 1.79E-22 | Cyto_CD8.T_RGS1 | IL-17 signaling pathway                                       | 0.012477768 | FOS/FOSB/JUN                                | 3 |
| CD74     | 0.352143707 | 3.11E-22 | Cyto_CD8.T_RGS1 | Prion disease                                                 | 0.012783337 | ATP5F1E/HSPA8/CCL5/TUBA4A/TUBA1A            | 5 |
| HLA-DPA1 | 0.266269985 | 6.53E-21 | Cyto_CD8.T_RGS1 | Staphylococcus aureus infection                               | 0.013205887 | HLA-DPA1/HLA-DQA1/HLA-DRB1                  | 3 |
| LIME1    | 0.277222202 | 5.42E-20 | Cyto_CD8.T_RGS1 | Tuberculosis                                                  | 0.013602521 | CD74/HLA-DPA1/HLA-DQA1/HLA-DRB1             | 4 |
| DNAJB1   | 0.399542672 | 3.07E-17 | Cyto_CD8.T_RGS1 | Viral protein interaction with cytokine and cytokine receptor | 0.014734065 | CCL4/CCL5/CCL4L2                            | 3 |
| FTH1     | 0.310430013 | 8.37E-17 | Cyto_CD8.T_RGS1 | NF-kappa B signaling pathway                                  | 0.01635885  | LCK/CCL4/CCL4L2                             | 3 |
| S100A6   | 0.282144947 | 3.20E-16 | Cyto_CD8.T_RGS1 | Chemokine signaling pathway                                   | 0.016878476 | CCL4/CCL5/CCL4L2/CXCR6                      | 4 |
| HSPA8    | 0.293198754 | 1.06E-15 | Cyto_CD8.T_RGS1 | Parathyroid hormone synthesis, secretion and action           | 0.017207689 | FOS/JUN/NR4A2                               | 3 |
| JUNB     | 0.326868672 | 4.67E-15 | Cyto_CD8.T_RGS1 | TNF signaling pathway                                         | 0.019900789 | FOS/JUNB/CCL5                               | 3 |
| ELF1     | 0.280677818 | 7.88E-14 | Cyto_CD8.T_RGS1 | Systemic lupus erythematosus                                  | 0.032884011 | HLA-DPA1/HLA-DQA1/HLA-DRB1                  | 3 |
| MCL1     | 0.31771856  | 2.70E-13 | Cyto_CD8.T_RGS1 | Fluid shear stress and atherosclerosis                        | 0.034754986 | ACTB/DUSP1/FOS                              | 3 |
| DUSP1    | 0.302790558 | 3.07E-13 | Cyto_CD8.T_RGS1 | Herpes simplex virus 1 infection                              | 0.040503984 | CD74/HLA-DPA1/HLA-DQA1/HLA-DRB1/CCL5/ZNF331 | 6 |
| ANXA1    | 0.485122804 | 3.43E-13 | Cyto_CD8.T_RGS1 | Amphetamine addiction                                         | 0.049348315 | FOS/FOSB                                    | 2 |
| ZNF331   | 0.308672758 | 3.89E-13 | Cyto_CD8.T_RGS1 |                                                               |             |                                             |   |
| YPEL5    | 0.287180137 | 3.17E-12 | Cyto_CD8.T_RGS1 |                                                               |             |                                             |   |
| NR4A2    | 0.250473896 | 3.51E-12 | Cyto_CD8.T_RGS1 |                                                               |             |                                             |   |
| ALOX5AP  | 0.260449832 | 6.88E-12 | Cyto_CD8.T_RGS1 |                                                               |             |                                             |   |
| KLF6     | 0.36354329  | 7.75E-12 | Cyto_CD8.T_RGS1 |                                                               |             |                                             |   |
| TUBA1A   | 0.262752151 | 2.12E-11 | Cyto_CD8.T_RGS1 |                                                               |             |                                             |   |
| FOS      | 0.501357224 | 3.86E-11 | Cyto_CD8.T_RGS1 |                                                               |             |                                             |   |
| FOSB     | 0.312289777 | 7.46E-11 | Cyto_CD8.T_RGS1 |                                                               |             |                                             |   |
| LCK      | 0.262696182 | 7.63E-11 | Cyto_CD8.T_RGS1 |                                                               |             |                                             |   |
| DDX24    | 0.259238004 | 4.12E-10 | Cyto_CD8.T_RGS1 |                                                               |             |                                             |   |
| TUBA4A   | 0.312940534 | 3.20E-09 | Cyto_CD8.T_RGS1 |                                                               |             |                                             |   |
| TRBC1    | 0.470255649 | 3.16E-08 | Cyto_CD8.T_RGS1 |                                                               |             |                                             |   |

#### d.Cyto\_CD8.T\_XCL1

| Gene symbol | avg_log2FC  | p_val_adj | Upregulated group | Description                                     | pvalue   | geneID                                                                              | Count |
|-------------|-------------|-----------|-------------------|-------------------------------------------------|----------|-------------------------------------------------------------------------------------|-------|
| XCL1        | 2.318865593 | 0         | Cyto_CD8.T_XCL1   | Natural killer cell mediated cytotoxicity       | 2.76E-09 | CASP3/CD247/CSF2/FCER1G/ICAM1/IFNG/KLRC1/KLRC3/KLRD1/SH2D1A/PIK3R1/TYROBP/TNFSF10   | 13    |
| XCL2        | 1.539118188 | 0         | Cyto_CD8.T_XCL1   | TNF signaling pathway                           | 5.59E-08 | BIRC2/CASP3/MAP3K8/CSF2/FOS/ICAM1/IRF1/LTA/NFKB1/NFKBIA/PIK3R1                      | 11    |
| FCER1G      | 1.154651593 | 0         | Cyto_CD8.T_XCL1   | Apoptosis                                       | 4.13E-07 | BIRC2/BCL2A1/CASP3/FOS/GADD45B/NFKB1/NFKBIA/PIK3R1/TNFSF10/BCL2L11/CYCS             | 11    |
| GSTP1       | 1.08861014  | 0         | Cyto_CD8.T_XCL1   | Fluid shear stress and atherosclerosis          | 5.15E-07 | DUSP1/FOS/GSTP1/HSP90AB1/ICAM1/IFNG/NFE2L2/NFKB1/PIK3R1/HSP90B1/SQSTM1              | 11    |
| GZMK        | 1.08561497  | 0         | Cyto_CD8.T_XCL1   | Lipid and atherosclerosis                       | 1.00E-06 | CASP3/FOS/HSP90AB1/HSPD1/ICAM1/NFE2L2/NFKB1/NFKBIA/PIK3R1/CCL3/HSP90B1/TNFSF10/CYCS | 13    |
| TYROBP      | 0.98789323  | 0         | Cyto_CD8.T_XCL1   | IL-17 signaling pathway                         | 1.21E-06 | CASP3/CSF2/FOS/HSP90AB1/IFNG/JUN/NFKB1/NFKBIA/HSP90B1                               | 9     |
| CD7         | 0.884089603 | 0         | Cyto_CD8.T_XCL1   | NF-kappa B signaling pathway                    | 2.84E-06 | BIRC2/BCL2A1/ICAM1/LTA/GADD45B/NFKB1/NFKBIA/CCL4/TNFSF14                            | 9     |
| B3GNT7      | 0.545979568 | 0         | Cyto_CD8.T_XCL1   | Colorectal cancer                               | 6.08E-06 | AREG/CASP3/FOS/GADD45B/PIK3R1/TCF7/BCL2L11/CYCS                                     | 8     |
| TRDC        | 0.840600764 | 1.31E-286 | Cyto_CD8.T_XCL1   | Acute myeloid leukemia                          | 1.10E-05 | BCL2A1/CSF2/NFKB1/PIK3R1/TCF7/ZBTB16/PIM2                                           | 7     |
| LAT2        | 0.610939726 | 4.50E-261 | Cyto_CD8.T_XCL1   | Kaposi sarcoma-associated herpesvirus infection | 1.35E-05 | CASP3/CSF2/FOS/ICAM1/NFKB1/NFKBIA/PIK3R1/TCF7/UBB/ZFP36/CYCS                        | 11    |
| KLRC1       | 0.800742989 | 2.43E-259 | Cyto_CD8.T_XCL1   | Osteoclast differentiation                      | 1.57E-05 | FOS/FOSL2/IFNG/JUN/NFKB1/NFKBIA/PIK3R1/TYROBP/SQSTM1                                | 9     |

|            |             |           |                 |                                                               |             |                                                                        |    |
|------------|-------------|-----------|-----------------|---------------------------------------------------------------|-------------|------------------------------------------------------------------------|----|
| CD81       | 0.635309696 | 5.46E-218 | Cyto_CD8.T_XCL1 | Viral protein interaction with cytokine and cytokine receptor | 1.87E-05    | IL2RB/LTA/CCL3/CCL4/XCL1/XCL2/TNFSF14/TNFSF10                          | 8  |
| CD160      | 0.706138368 | 2.43E-217 | Cyto_CD8.T_XCL1 | T cell receptor signaling pathway                             | 2.49E-05    | CD247/MAP3K8/CSF2/FOS/IFNG/NFKB1/NFKBIA/PIK3R1                         | 8  |
| IL2RB      | 0.744054116 | 1.17E-197 | Cyto_CD8.T_XCL1 | Measles                                                       | 3.04E-05    | CASP3/CCND2/FOS/IL2RB/NFKB1/NFKBIA/PIK3R1/RAB9A/CYCS                   | 9  |
| KLRF1      | 0.69198983  | 3.38E-197 | Cyto_CD8.T_XCL1 | Transcriptional misregulation in cancer                       | 7.02E-05    | BIRC2/BCL2A1/CCND2/CSF2/IL2RB/GADD45B/NFKB1/REL/ZBTB16/NFKBIZ          | 10 |
| IFITM2     | 0.66863871  | 4.35E-196 | Cyto_CD8.T_XCL1 | Small cell lung cancer                                        | 8.80E-05    | BIRC2/CASP3/GADD45B/NFKB1/NFKBIA/PIK3R1/CYCS                           | 7  |
| IRF8       | 0.662845867 | 8.64E-193 | Cyto_CD8.T_XCL1 | Epstein-Barr virus infection                                  | 0.000107305 | CASP3/CCND2/CD247/ICAM1/GADD45B/NFKB1/NFKBIA/PIK3R1/BCL2L11/CYCS       | 10 |
| TOX2       | 0.301145553 | 7.85E-186 | Cyto_CD8.T_XCL1 | Prostate cancer                                               | 0.000123088 | GSTP1/HSP90AB1/NFKB1/NFKBIA/PIK3R1/TCF7/HSP90B1                        | 7  |
| CMC1       | 0.785154405 | 5.35E-180 | Cyto_CD8.T_XCL1 | Salmonella infection                                          | 0.000132507 | BIRC2/CASP3/FOS/HSP90AB1/NFKB1/NFKBIA/TCF7/HSP90B1/TNFSF10/RAB9A/CYCS  | 11 |
| FAM177A1   | 0.844640268 | 7.89E-180 | Cyto_CD8.T_XCL1 | Cytokine-cytokine receptor interaction                        | 0.000141198 | CSF2/IFNG/IL2RB/LTA/CCL3/CCL4/XCL1/XCL2/TNFSF14/TNFSF10/TNFRSF18/CXCR6 | 12 |
| CD63       | 0.631804459 | 3.07E-178 | Cyto_CD8.T_XCL1 | Chagas disease                                                | 0.000168831 | CD247/FOS/IFNG/NFKB1/NFKBIA/PIK3R1/CCL3                                | 7  |
| TNFSF14    | 0.715604937 | 3.04E-175 | Cyto_CD8.T_XCL1 | Toll-like receptor signaling pathway                          | 0.000190602 | MAP3K8/FOS/NFKB1/NFKBIA/PIK3R1/CCL3/CCL4                               | 7  |
| GADD45B    | 1.060172563 | 4.07E-174 | Cyto_CD8.T_XCL1 | Human T-cell leukemia virus 1 infection                       | 0.000232846 | CCND2/CSF2/FOS/ICAM1/IL2RB/LTA/NFKB1/NFKBIA/PIK3R1/ZFP36               | 10 |
| SRGN       | 0.523862831 | 6.36E-174 | Cyto_CD8.T_XCL1 | Th17 cell differentiation                                     | 0.000240963 | CD247/FOS/HSP90AB1/IFNG/IL2RB/NFKB1/NFKBIA                             | 7  |
| PTMA       | 0.403740847 | 5.73E-154 | Cyto_CD8.T_XCL1 | B cell receptor signaling pathway                             | 0.000355363 | CD81/FOS/NFKB1/NFKBIA/PIK3R1/IFITM1                                    | 6  |
| AC017104.1 | 0.384106892 | 7.95E-153 | Cyto_CD8.T_XCL1 | Apoptosis - multiple species                                  | 0.000474036 | BIRC2/CASP3/BCL2L11/CYCS                                               | 4  |
| REL        | 0.636479433 | 8.37E-149 | Cyto_CD8.T_XCL1 | Legionellosis                                                 | 0.000488195 | CASP3/HSPD1/NFKB1/NFKBIA/CYCS                                          | 5  |
| CLIC3      | 0.660342122 | 3.02E-148 | Cyto_CD8.T_XCL1 | PD-L1 expression and PD-1 checkpoint pathway in cancer        | 0.000552688 | CD247/FOS/IFNG/NFKB1/NFKBIA/PIK3R1                                     | 6  |
| TIGIT      | 0.612580242 | 2.21E-144 | Cyto_CD8.T_XCL1 | Th1 and Th2 cell differentiation                              | 0.000659609 | CD247/FOS/IFNG/IL2RB/NFKB1/NFKBIA                                      | 6  |
| DUSP1      | 0.685019661 | 5.42E-144 | Cyto_CD8.T_XCL1 | Rheumatoid arthritis                                          | 0.000698599 | ATP6V0C/CSF2/FOS/ICAM1/IFNG/CCL3                                       | 6  |
| SERPINE2   | 0.251693036 | 1.14E-140 | Cyto_CD8.T_XCL1 | Human immunodeficiency virus 1 infection                      | 0.000744635 | BST2/CASP3/CD247/FOS/NFKB1/NFKBIA/PIK3R1/CYCS/APOBEC3G                 | 9  |
| SLFN13     | 0.401318484 | 2.71E-138 | Cyto_CD8.T_XCL1 | Influenza A                                                   | 0.000788367 | CASP3/ICAM1/IFNG/NFKB1/NFKBIA/PIK3R1/TNFSF10/CYCS                      | 8  |
| ICAM1      | 0.644591481 | 1.32E-137 | Cyto_CD8.T_XCL1 | Prolactin signaling pathway                                   | 0.001253788 | CCND2/FOS/IRF1/NFKB1/PIK3R1                                            | 5  |
| CLDN1      | 0.547645316 | 4.88E-134 | Cyto_CD8.T_XCL1 | Platinum drug resistance                                      | 0.001514187 | BIRC2/CASP3/GSTP1/PIK3R1/CYCS                                          | 5  |
| CSF2       | 0.728825267 | 5.65E-133 | Cyto_CD8.T_XCL1 | Chemokine signaling pathway                                   | 0.001664183 | NFKB1/NFKBIA/PIK3R1/CCL3/CCL4/XCL1/XCL2/CXCR6                          | 8  |
| DHRS3      | 0.504150451 | 8.14E-132 | Cyto_CD8.T_XCL1 | Pertussis                                                     | 0.001812413 | CASP3/FOS/IRF8/IRF1/NFKB1                                              | 5  |
| CCL3       | 1.022740218 | 1.99E-131 | Cyto_CD8.T_XCL1 | Toxoplasmosis                                                 | 0.001839299 | BIRC2/CASP3/IFNG/NFKB1/NFKBIA/CYCS                                     | 6  |
| STX11      | 0.572469857 | 2.29E-130 | Cyto_CD8.T_XCL1 | Antigen processing and presentation                           | 0.002033803 | HSP90AB1/IFNG/KLRC1/KLRC3/KLRD1                                        | 5  |
| ZFP36      | 0.715164692 | 4.45E-128 | Cyto_CD8.T_XCL1 | Hepatitis C                                                   | 0.002225081 | CASP3/CD81/IFNG/NFKB1/NFKBIA/PIK3R1/CYCS                               | 7  |
| NFKBIA     | 0.822669261 | 1.17E-119 | Cyto_CD8.T_XCL1 | Malaria                                                       | 0.00259     | CD81/GYPC/ICAM1/IFNG                                                   | 4  |
| CCND2      | 0.671233952 | 1.89E-118 | Cyto_CD8.T_XCL1 | cAMP signaling pathway                                        | 0.003980275 | ATP1B1/ATP1B3/FOS/NFKB1/NFKBIA/PDE4A/PDE4B/PIK3R1                      | 8  |
| ATP1B1     | 0.33584711  | 2.74E-116 | Cyto_CD8.T_XCL1 | Tuberculosis                                                  | 0.004757506 | ATP6V0C/CASP3/FCER1G/HSPD1/IFNG/NFKB1/CYCS                             | 7  |
| ANP32A     | 0.636825362 | 9.35E-106 | Cyto_CD8.T_XCL1 | Cytosolic DNA-sensing pathway                                 | 0.005976244 | NFKB1/NFKBIA/POLR2K/CCL4                                               | 4  |
| CEMIP2     | 0.656922451 | 2.24E-99  | Cyto_CD8.T_XCL1 | Amoebiasis                                                    | 0.006458403 | CASP3/CSF2/IFNG/NFKB1/PIK3R1                                           | 5  |
| CXCR6      | 0.497999893 | 2.64E-98  | Cyto_CD8.T_XCL1 | MAPK signaling pathway                                        | 0.006825475 | AREG/CASP3/MAP3K8/DUSP1/FOS/MKNK2/JUND/GADD45B/NFKB1                   | 9  |
| NR4A2      | 0.565104091 | 2.29E-97  | Cyto_CD8.T_XCL1 | C-type lectin receptor signaling pathway                      | 0.00700327  | FCER1G/IRF1/NFKB1/NFKBIA/PIK3R1                                        | 5  |
| OTULIN     | 0.597241699 | 1.88E-96  | Cyto_CD8.T_XCL1 | Parathyroid hormone synthesis, secretion and action           | 0.007579572 | FOS/JUND/NR4A2/PDE4A/PDE4B                                             | 5  |
| MATK       | 0.439647619 | 6.65E-93  | Cyto_CD8.T_XCL1 | Fc epsilon RI signaling pathway                               | 0.007820659 | ALOX5AP/CSF2/FCER1G/PIK3R1                                             | 4  |
| TIPARP     | 0.550234454 | 2.44E-92  | Cyto_CD8.T_XCL1 | Epithelial cell signaling in Helicobacter pylori infection    | 0.00865241  | ATP6V0C/CASP3/NFKB1/NFKBIA                                             | 4  |
| GNL3       | 0.63322897  | 1.37E-89  | Cyto_CD8.T_XCL1 | Aldosterone-regulated sodium reabsorption                     | 0.008803227 | ATP1B1/ATP1B3/PIK3R1                                                   | 3  |
| NFKB1      | 0.560331782 | 1.85E-87  | Cyto_CD8.T_XCL1 | Non-alcoholic fatty liver disease                             | 0.009036538 | CASP3/FOS/NFKB1/PIK3R1/BCL2L11/CYCS                                    | 6  |
| PRR7       | 0.410116634 | 2.07E-87  | Cyto_CD8.T_XCL1 | p53 signaling pathway                                         | 0.010005379 | CASP3/CCND2/GADD45B/CYCS                                               | 4  |
| JUND       | 0.430507236 | 4.66E-87  | Cyto_CD8.T_XCL1 | Necroptosis                                                   | 0.010175192 | BIRC2/HSP90AB1/IFNG/TNFSF10/SQSTM1/CHMP1B                              | 6  |
| PDLIM1     | 0.278094318 | 1.68E-86  | Cyto_CD8.T_XCL1 | Hepatitis B                                                   | 0.011093854 | CASP3/FOS/NFKB1/NFKBIA/PIK3R1/CYCS                                     | 6  |
| ALOX5AP    | 0.530979972 | 8.20E-86  | Cyto_CD8.T_XCL1 | Chronic myeloid leukemia                                      | 0.011488901 | GADD45B/NFKB1/NFKBIA/PIK3R1                                            | 4  |
| PHLDB2     | 0.32081692  | 5.00E-85  | Cyto_CD8.T_XCL1 | Leishmaniasis                                                 | 0.012013182 | FOS/IFNG/NFKB1/NFKBIA                                                  | 4  |
| NFKBID     | 0.533435129 | 7.09E-85  | Cyto_CD8.T_XCL1 | Graft-versus-host disease                                     | 0.012477768 | IFNG/KLRC1/KLRD1                                                       | 3  |
| CXXC5      | 0.327064455 | 1.17E-83  | Cyto_CD8.T_XCL1 | Type 1 diabetes mellitus                                      | 0.013302888 | HSPD1/IFNG/LTA                                                         | 3  |
| METRNL     | 0.582899189 | 3.25E-83  | Cyto_CD8.T_XCL1 | Human cytomegalovirus infection                               | 0.015291688 | CASP3/NFKB1/NFKBIA/PIK3R1/CCL3/CCL4/CYCS                               | 7  |
| NCAM1      | 0.287763618 | 5.92E-83  | Cyto_CD8.T_XCL1 | Carbohydrate digestion and absorption                         | 0.016909622 | ATP1B1/ATP1B3/PIK3R1                                                   | 3  |
| BCL2L11    | 0.37818169  | 3.06E-82  | Cyto_CD8.T_XCL1 | FoxO signaling pathway                                        | 0.017780148 | CCND2/GADD45B/PIK3R1/TNFSF10/BCL2L11                                   | 5  |

|           |             |          |                 |                                                      |             |                                                                   |    |
|-----------|-------------|----------|-----------------|------------------------------------------------------|-------------|-------------------------------------------------------------------|----|
| FOSL2     | 0.507320546 | 3.96E-79 | Cyto_CD8.T_XCL1 | PI3K-Akt signaling pathway                           | 0.021063762 | AREG/CCND2/HSP90A1/IL2RB/NFKB1/PIK3R1/HSP90B1/BCL2L1/DDIT4        | 9  |
| AREG      | 0.855425194 | 2.26E-78 | Cyto_CD8.T_XCL1 | Shigellosis                                          | 0.024171382 | CSF2/NFKB1/NFKBIA/PIK3R1/UBB/SQSTM1/CYCS                          | 7  |
| TNFSF10   | 0.39973106  | 2.07E-75 | Cyto_CD8.T_XCL1 | Pathogenic Escherichia coli infection                | 0.026497687 | CASP3/FOS/NFKB1/NFKBIA/TNFSF10/CYCS                               | 6  |
| KDM6B     | 0.502851487 | 7.25E-75 | Cyto_CD8.T_XCL1 | Herpes simplex virus 1 infection                     | 0.02737263  | BIRC2/BST2/CASP3/IFNG/LTA/NFKB1/NFKBIA/PIK3R1/TNFSF14/CYCS/ZNF331 | 11 |
| FEZ1      | 0.393064181 | 4.85E-74 | Cyto_CD8.T_XCL1 | AGE-RAGE signaling pathway in diabetic complications | 0.028505878 | CASP3/ICAM1/NFKB1/PIK3R1                                          | 4  |
| IFITM1    | 0.443893483 | 1.48E-72 | Cyto_CD8.T_XCL1 | Proximal tubule bicarbonate reclamation              | 0.028694664 | ATP1B1/ATP1B3                                                     | 2  |
| CEBPD     | 0.544473312 | 2.84E-72 | Cyto_CD8.T_XCL1 | Endometrial cancer                                   | 0.0293884   | GADD45B/PIK3R1/TCF7                                               | 3  |
| VPS37B    | 0.43693876  | 3.96E-72 | Cyto_CD8.T_XCL1 | Viral carcinogenesis                                 | 0.030738412 | CASP3/CCND2/NFKB1/NFKBIA/PIK3R1/REL                               | 6  |
| PDE7A     | 0.43887402  | 1.06E-71 | Cyto_CD8.T_XCL1 | Viral myocarditis                                    | 0.032061356 | CASP3/ICAM1/CYCS                                                  | 3  |
| BCL2A1    | 0.617131387 | 5.53E-71 | Cyto_CD8.T_XCL1 | Cellular senescence                                  | 0.034489014 | CCND2/GADD45B/NFKB1/PIK3R1/SQSTM1                                 | 5  |
| SLC16A3   | 0.315475149 | 8.72E-70 | Cyto_CD8.T_XCL1 | HIF-1 signaling pathway                              | 0.037418986 | MKNK2/IFNG/NFKB1/PIK3R1                                           | 4  |
| RAB11FIP1 | 0.396770707 | 2.16E-69 | Cyto_CD8.T_XCL1 | JAK-STAT signaling pathway                           | 0.039583371 | CCND2/CSF2/IFNG/IL2RB/PIK3R1                                      | 5  |
| CD247     | 0.401539504 | 3.14E-69 | Cyto_CD8.T_XCL1 | Hepatocellular carcinoma                             | 0.045115637 | GSTP1/GADD45B/NFE2L2/PIK3R1/TCF7                                  | 5  |
| RBBP8     | 0.343288453 | 8.12E-69 | Cyto_CD8.T_XCL1 | Neurotrophin signaling pathway                       | 0.049007544 | MATK/NFKB1/NFKBIA/PIK3R1                                          | 4  |
| TNFRSF18  | 0.387891259 | 2.19E-66 | Cyto_CD8.T_XCL1 |                                                      |             |                                                                   |    |
| KRT86     | 0.288512837 | 1.02E-65 | Cyto_CD8.T_XCL1 |                                                      |             |                                                                   |    |
| PABPC1    | 0.399390013 | 1.15E-65 | Cyto_CD8.T_XCL1 |                                                      |             |                                                                   |    |
| MKNK2     | 0.403884785 | 2.75E-64 | Cyto_CD8.T_XCL1 |                                                      |             |                                                                   |    |
| IFITM3    | 0.371803201 | 1.67E-63 | Cyto_CD8.T_XCL1 |                                                      |             |                                                                   |    |
| IRF1      | 0.415715525 | 1.77E-63 | Cyto_CD8.T_XCL1 |                                                      |             |                                                                   |    |
| MAP3K8    | 0.400970282 | 5.08E-63 | Cyto_CD8.T_XCL1 |                                                      |             |                                                                   |    |
| ZNF331    | 0.531294122 | 7.16E-63 | Cyto_CD8.T_XCL1 |                                                      |             |                                                                   |    |
| ATP1B3    | 0.630145398 | 3.98E-62 | Cyto_CD8.T_XCL1 |                                                      |             |                                                                   |    |
| BST2      | 0.369099247 | 2.50E-60 | Cyto_CD8.T_XCL1 |                                                      |             |                                                                   |    |
| ADGRE5    | 0.420343956 | 7.89E-60 | Cyto_CD8.T_XCL1 |                                                      |             |                                                                   |    |
| H3F3B     | 0.278871805 | 2.54E-58 | Cyto_CD8.T_XCL1 |                                                      |             |                                                                   |    |
| TCF7      | 0.311734391 | 2.08E-56 | Cyto_CD8.T_XCL1 |                                                      |             |                                                                   |    |
| TMIGD2    | 0.293116712 | 4.26E-56 | Cyto_CD8.T_XCL1 |                                                      |             |                                                                   |    |
| AOAH      | 0.330863791 | 6.37E-56 | Cyto_CD8.T_XCL1 |                                                      |             |                                                                   |    |
| NINJ1     | 0.447573498 | 1.64E-55 | Cyto_CD8.T_XCL1 |                                                      |             |                                                                   |    |
| CD38      | 0.300475752 | 2.27E-54 | Cyto_CD8.T_XCL1 |                                                      |             |                                                                   |    |
| IFRD1     | 0.392718418 | 2.44E-54 | Cyto_CD8.T_XCL1 |                                                      |             |                                                                   |    |
| KLRC3     | 0.305622064 | 5.36E-53 | Cyto_CD8.T_XCL1 |                                                      |             |                                                                   |    |
| APMAP     | 0.326410136 | 9.38E-53 | Cyto_CD8.T_XCL1 |                                                      |             |                                                                   |    |
| SKIL      | 0.388419927 | 1.47E-52 | Cyto_CD8.T_XCL1 |                                                      |             |                                                                   |    |
| CDC42SE1  | 0.362872651 | 2.43E-52 | Cyto_CD8.T_XCL1 |                                                      |             |                                                                   |    |
| HSP90A1   | 0.321120636 | 1.92E-51 | Cyto_CD8.T_XCL1 |                                                      |             |                                                                   |    |
| PDE4A     | 0.269203087 | 6.11E-51 | Cyto_CD8.T_XCL1 |                                                      |             |                                                                   |    |
| BAZ1A     | 0.471284814 | 2.56E-50 | Cyto_CD8.T_XCL1 |                                                      |             |                                                                   |    |
| LTA       | 0.369400546 | 7.67E-50 | Cyto_CD8.T_XCL1 |                                                      |             |                                                                   |    |
| NFIL3     | 0.317750812 | 1.39E-49 | Cyto_CD8.T_XCL1 |                                                      |             |                                                                   |    |
| MCTP2     | 0.257934697 | 1.88E-49 | Cyto_CD8.T_XCL1 |                                                      |             |                                                                   |    |
| SH2D1A    | 0.330670603 | 1.04E-48 | Cyto_CD8.T_XCL1 |                                                      |             |                                                                   |    |
| UBB       | 0.258060943 | 1.86E-48 | Cyto_CD8.T_XCL1 |                                                      |             |                                                                   |    |
| POLR2K    | 0.366367339 | 1.60E-47 | Cyto_CD8.T_XCL1 |                                                      |             |                                                                   |    |
| BIRC2     | 0.311894657 | 1.63E-46 | Cyto_CD8.T_XCL1 |                                                      |             |                                                                   |    |
| STK17A    | 0.33861878  | 3.45E-46 | Cyto_CD8.T_XCL1 |                                                      |             |                                                                   |    |
| CD83      | 0.562832062 | 4.62E-45 | Cyto_CD8.T_XCL1 |                                                      |             |                                                                   |    |
| YPEL5     | 0.348470133 | 7.71E-44 | Cyto_CD8.T_XCL1 |                                                      |             |                                                                   |    |
| H2AFJ     | 0.338441082 | 1.49E-43 | Cyto_CD8.T_XCL1 |                                                      |             |                                                                   |    |
| CASP3     | 0.306898304 | 1.60E-43 | Cyto_CD8.T_XCL1 |                                                      |             |                                                                   |    |
| ZBTB16    | 0.268973527 | 3.26E-43 | Cyto_CD8.T_XCL1 |                                                      |             |                                                                   |    |
| PIK3R1    | 0.361363035 | 6.73E-43 | Cyto_CD8.T_XCL1 |                                                      |             |                                                                   |    |
| ARL5B     | 0.394092961 | 2.00E-42 | Cyto_CD8.T_XCL1 |                                                      |             |                                                                   |    |
| CSRNP1    | 0.296077031 | 1.41E-41 | Cyto_CD8.T_XCL1 |                                                      |             |                                                                   |    |
| DNAJA1    | 0.307863685 | 2.67E-41 | Cyto_CD8.T_XCL1 |                                                      |             |                                                                   |    |
| SQSTM1    | 0.312531592 | 3.33E-41 | Cyto_CD8.T_XCL1 |                                                      |             |                                                                   |    |
| ATP6VOC   | 0.323554439 | 4.01E-41 | Cyto_CD8.T_XCL1 |                                                      |             |                                                                   |    |
| STARD3NL  | 0.287131394 | 1.47E-40 | Cyto_CD8.T_XCL1 |                                                      |             |                                                                   |    |
| RAB9A     | 0.347320586 | 2.33E-40 | Cyto_CD8.T_XCL1 |                                                      |             |                                                                   |    |
| PDE4B     | 0.309962991 | 4.92E-40 | Cyto_CD8.T_XCL1 |                                                      |             |                                                                   |    |

|          |             |          |                 |
|----------|-------------|----------|-----------------|
| DENND4A  | 0.295780781 | 9.46E-40 | Cyto_CD8.T_XCL1 |
| HCG18    | 0.345176788 | 1.21E-39 | Cyto_CD8.T_XCL1 |
| KLRD1    | 0.250821078 | 7.12E-39 | Cyto_CD8.T_XCL1 |
| RAB21    | 0.351165678 | 1.60E-38 | Cyto_CD8.T_XCL1 |
| CCDC107  | 0.346856686 | 4.14E-38 | Cyto_CD8.T_XCL1 |
| OFD1     | 0.256907914 | 5.00E-38 | Cyto_CD8.T_XCL1 |
| MIR222HG | 0.278064402 | 1.71E-37 | Cyto_CD8.T_XCL1 |
| EIF4A1   | 0.270706806 | 2.78E-37 | Cyto_CD8.T_XCL1 |
| RANBP2   | 0.356658129 | 6.85E-36 | Cyto_CD8.T_XCL1 |
| RHOC     | 0.271548567 | 1.85E-35 | Cyto_CD8.T_XCL1 |
| ZC3H12A  | 0.303018785 | 4.55E-35 | Cyto_CD8.T_XCL1 |
| COTL1    | 0.291462352 | 1.41E-34 | Cyto_CD8.T_XCL1 |
| RBM39    | 0.270974757 | 3.24E-34 | Cyto_CD8.T_XCL1 |
| CYCS     | 0.31020421  | 6.28E-34 | Cyto_CD8.T_XCL1 |
| HSP90B1  | 0.410723092 | 8.02E-34 | Cyto_CD8.T_XCL1 |
| SYTL3    | 0.317250925 | 9.04E-34 | Cyto_CD8.T_XCL1 |
| GYPC     | 0.29481048  | 9.37E-34 | Cyto_CD8.T_XCL1 |
| CCL4     | 0.46398013  | 1.21E-33 | Cyto_CD8.T_XCL1 |
| SERTAD1  | 0.294222861 | 1.18E-32 | Cyto_CD8.T_XCL1 |
| APOBEC3G | 0.331487432 | 2.17E-32 | Cyto_CD8.T_XCL1 |
| FOS      | 0.431527704 | 7.79E-32 | Cyto_CD8.T_XCL1 |
| RBM38    | 0.282323847 | 2.68E-30 | Cyto_CD8.T_XCL1 |
| ARL4A    | 0.27849193  | 1.72E-29 | Cyto_CD8.T_XCL1 |
| CHMP1B   | 0.411915139 | 5.01E-29 | Cyto_CD8.T_XCL1 |
| CCNH     | 0.304148011 | 6.55E-29 | Cyto_CD8.T_XCL1 |
| PIM2     | 0.251927739 | 8.70E-29 | Cyto_CD8.T_XCL1 |
| NFKBIZ   | 0.331893908 | 9.24E-29 | Cyto_CD8.T_XCL1 |
| FGFR1OP2 | 0.254981274 | 1.03E-27 | Cyto_CD8.T_XCL1 |
| DDIT4    | 0.330199937 | 1.08E-27 | Cyto_CD8.T_XCL1 |
| DNAJB6   | 0.264704365 | 1.42E-27 | Cyto_CD8.T_XCL1 |
| MIR155HG | 0.454449385 | 3.08E-27 | Cyto_CD8.T_XCL1 |
| RAB8B    | 0.256955112 | 1.39E-26 | Cyto_CD8.T_XCL1 |
| HSPE1    | 0.335092947 | 1.93E-26 | Cyto_CD8.T_XCL1 |
| GPR35    | 0.258214656 | 5.92E-26 | Cyto_CD8.T_XCL1 |
| TWISTNB  | 0.339030836 | 2.33E-25 | Cyto_CD8.T_XCL1 |
| NFE2L2   | 0.274001569 | 1.09E-24 | Cyto_CD8.T_XCL1 |
| FAM107B  | 0.295507229 | 4.46E-24 | Cyto_CD8.T_XCL1 |
| PPP1R2   | 0.253439553 | 1.16E-23 | Cyto_CD8.T_XCL1 |
| PLIN2    | 0.319737213 | 2.51E-22 | Cyto_CD8.T_XCL1 |
| HSPD1    | 0.318507586 | 2.02E-20 | Cyto_CD8.T_XCL1 |
| BCAS2    | 0.257464805 | 4.73E-20 | Cyto_CD8.T_XCL1 |
| TAGAP    | 0.261959724 | 8.74E-18 | Cyto_CD8.T_XCL1 |
| IFNG     | 0.373970926 | 6.03E-07 | Cyto_CD8.T_XCL1 |

e. Cyto\_CD8.T\_IL7R

| Gene symbol | avg_log2FC  | p_val_adj | Upregulated group | Description | pvalue   | geneID                                                                                                                                                                                                                                                                                                                                                                                                                           | Count |
|-------------|-------------|-----------|-------------------|-------------|----------|----------------------------------------------------------------------------------------------------------------------------------------------------------------------------------------------------------------------------------------------------------------------------------------------------------------------------------------------------------------------------------------------------------------------------------|-------|
| LTB         | 2.220384696 | 0         | Cyto_CD8.T_IL7R   | Ribosome    | 2.58E-76 | RPSA/RPL10A/RPL3/RPL4/RPL5/RPL6/RPL7/RPL8/RPL9/RPL10/RPL11/RPL12/RPL13/RPL15/RPL17/RPL18/RPL18A/RPL19/RPL21/RPL22/RPL23A/RPL24/RPL26/RPL27/RPL30/RPL27A/RPL28/RPL29/RPL31/RPL32/RPL34/RPL35A/RPL37/RPL37A/RPL38/RPL41/RPL36A/RPLP0/RPLP1/RPLP2/RPS2/RPS3/RPS3A/RPS4X/RPS5/RPS6/RPS8/RPS9/RPS11/RPS12/RPS13/RPS14/RPS16/RPS17/RPS18/RPS19/RPS20/RPS21/RPS23/RPS24/RPS25/RPS27/RPS27A/RPS29/UBA52/RPL23/RPL35/RPL13A/RPL36/RPL22L1 | 70    |

|          |             |           |                 |                                                               |             |                                                                                                                                                                                                                                                                                                                                                                                                                                                             |    |
|----------|-------------|-----------|-----------------|---------------------------------------------------------------|-------------|-------------------------------------------------------------------------------------------------------------------------------------------------------------------------------------------------------------------------------------------------------------------------------------------------------------------------------------------------------------------------------------------------------------------------------------------------------------|----|
| IL7R     | 1.909418567 | 0         | Cyto_CD8.T_IL7R | Coronavirus disease - COVID-19                                | 1.06E-69    | JUN/RPSA/RPL10A/NFKB1/NFKBIA/RPL3/RPL4/RPL5/RPL6/RPL7/RPL8/RPL9/RPL10/RPL11/RPL12/RPL13/RPL15/RPL17/RPL18/RPL18A/RPL19/RPL21/RPL22/RPL23A/RPL24/RPL26/RPL27/RPL30/RPL27A/RPL28/RPL29/RPL31/RPL32/RPL34/RPL35A/RPL37/RPL37A/RPL38/RPL41/RPL36A/RPLP0/RPLP1/RPLP2/RPS2/RPS3/RPS3A/RPS4X/RPS5/RPS6/RPS8/RPS9/RPS11/RPS12/RPS13/RPS14/RPS16/RPS17/RPS18/RPS19/RPS20/RPS21/RPS23/RPS24/RPS25/RPS27/RPS27A/RPS29/STAT1/TNF/UBA52/RPL23/RPL35/RPL13A/RPL36/RPL22L1 | 75 |
| IL4I1    | 0.973148242 | 0         | Cyto_CD8.T_IL7R | Inflammatory bowel disease                                    | 2.19E-08    | IFNGR1/JUN/MAF/NFKB1/RORA/RORC/STAT1/STAT4/TNF/IL18RAP/IL23A/IL23R                                                                                                                                                                                                                                                                                                                                                                                          | 12 |
| TPT1     | 0.897286736 | 0         | Cyto_CD8.T_IL7R | Measles                                                       | 3.46E-06    | FAS/BCL2/CD3D/CD3E/CD3G/CD28/JUN/NFKB1/NFKBIA/SLAMF1/STAT1/TNFAIP3/EIF3H/RACK1                                                                                                                                                                                                                                                                                                                                                                              | 14 |
| SLC4A10  | 0.897016036 | 0         | Cyto_CD8.T_IL7R | Chagas disease                                                | 3.49E-06    | FAS/CD3D/CD3E/CD3G/GNA15/IFNGR1/JUN/NFKB1/NFKBIA/CCL3L1/TNF/PLCB1                                                                                                                                                                                                                                                                                                                                                                                           | 12 |
| CCR6     | 0.786384738 | 0         | Cyto_CD8.T_IL7R | PD-L1 expression and PD-1 checkpoint pathway in cancer        | 5.55E-06    | CD3D/CD3E/CD3G/CD28/IFNGR1/JUN/NFKB1/NFKBIA/STAT1/RASGRP1/EML4                                                                                                                                                                                                                                                                                                                                                                                              | 11 |
| KLRB1    | 1.256759673 | 8.20E-287 | Cyto_CD8.T_IL7R | Th17 cell differentiation                                     | 6.39E-06    | CD3D/CD3E/CD3G/IFNGR1/JUN/NFKB1/NFKBIA/RORA/RORC/STAT1/IL23A/IL23R                                                                                                                                                                                                                                                                                                                                                                                          | 12 |
| RORC     | 0.442897519 | 5.50E-255 | Cyto_CD8.T_IL7R | NF-kappa B signaling pathway                                  | 2.51E-05    | BIRC3/BCL2/BCL2A1/LTA/LTB/NFKB1/NFKB2/NFKBIA/TNF/TNFAIP3/TRAFF1                                                                                                                                                                                                                                                                                                                                                                                             | 11 |
| TNFRSF25 | 0.698207647 | 8.99E-255 | Cyto_CD8.T_IL7R | T cell receptor signaling pathway                             | 2.51E-05    | CD3D/CD3E/CD3G/CD8A/CD28/JUN/NFKB1/NFKBIA/PAK2/TNF/RASGRP1                                                                                                                                                                                                                                                                                                                                                                                                  | 11 |
| AQP3     | 0.712436267 | 2.76E-247 | Cyto_CD8.T_IL7R | Th1 and Th2 cell differentiation                              | 4.66E-05    | CD3D/CD3E/CD3G/IFNGR1/JUN/MAF/NFKB1/NFKBIA/STAT1/STAT4                                                                                                                                                                                                                                                                                                                                                                                                      | 10 |
| LST1     | 0.623230865 | 4.36E-239 | Cyto_CD8.T_IL7R | TNF signaling pathway                                         | 5.03E-05    | BIRC3/FAS/JUN/JUNB/LTA/NFKB1/NFKBIA/TNF/TNFAIP3/TRAFF1/SOCS3                                                                                                                                                                                                                                                                                                                                                                                                | 11 |
| RPL13    | 0.676811127 | 1.21E-226 | Cyto_CD8.T_IL7R | Hematopoietic cell lineage                                    | 8.76E-05    | CD2/CD3D/CD3E/CD3G/CD5/CD8A/CD44/FLT3LG/IL7R/TNF                                                                                                                                                                                                                                                                                                                                                                                                            | 10 |
| KIF5C    | 0.371904693 | 3.12E-222 | Cyto_CD8.T_IL7R | Cytokine-cytokine receptor interaction                        | 0.00014809  | FAS/CD27/CD70/CCR6/IFNGR1/IL7R/LTA/LTB/CCL3L1/TNF/CXCR4/TNFRSF25/TNFRSF18/IL18RAP/IL32/CXCR6/IL23A/IL23R                                                                                                                                                                                                                                                                                                                                                    | 18 |
| IL23R    | 0.326461276 | 1.49E-219 | Cyto_CD8.T_IL7R | Epstein-Barr virus infection                                  | 0.000226196 | FAS/BCL2/CD3D/CD3E/CD3G/CD44/JUN/NFKB1/NFKB2/NFKBIA/STAT1/TNF/TNFAIP3/VIM                                                                                                                                                                                                                                                                                                                                                                                   | 14 |
| SLAMF1   | 0.612949094 | 2.77E-218 | Cyto_CD8.T_IL7R | Osteoclast differentiation                                    | 0.000716771 | CAMK4/IFNGR1/JUN/JUNB/NFKB1/NFKB2/NFKBIA/STAT1/TNF/SOCS3                                                                                                                                                                                                                                                                                                                                                                                                    | 10 |
| CD28     | 0.58794011  | 1.44E-214 | Cyto_CD8.T_IL7R | Legionellosis                                                 | 0.001891967 | EEF1A1/EEF1G/NFKB1/NFKB2/NFKBIA/TNF                                                                                                                                                                                                                                                                                                                                                                                                                         | 6  |
| RPL17    | 0.684819952 | 1.97E-204 | Cyto_CD8.T_IL7R | Leishmaniasis                                                 | 0.001904863 | EEF1A1/IFNGR1/JUN/NFKB1/NFKBIA/STAT1/TNF                                                                                                                                                                                                                                                                                                                                                                                                                    | 7  |
| DUSP16   | 0.474693564 | 8.49E-204 | Cyto_CD8.T_IL7R | Apoptosis                                                     | 0.00410364  | BIRC3/FAS/BCL2/BCL2A1/JUN/NFKB1/NFKBIA/TNF/TRAFF1                                                                                                                                                                                                                                                                                                                                                                                                           | 9  |
| DPP4     | 0.343814217 | 2.44E-200 | Cyto_CD8.T_IL7R | AGE-RAGE signaling pathway in diabetic complications          | 0.008152472 | BCL2/JUN/NFKB1/PIM1/STAT1/TNF/PLCB1                                                                                                                                                                                                                                                                                                                                                                                                                         | 7  |
| EEF1A1   | 0.54910023  | 2.85E-200 | Cyto_CD8.T_IL7R | Human immunodeficiency virus 1 infection                      | 0.009807042 | FAS/BCL2/CD3D/CD3E/CD3G/JUN/NFKB1/NFKBIA/PAK2/TNF/CXCR4                                                                                                                                                                                                                                                                                                                                                                                                     | 11 |
| RPL3     | 0.745923988 | 5.82E-200 | Cyto_CD8.T_IL7R | NOD-like receptor signaling pathway                           | 0.009993614 | BIRC3/BCL2/JUN/NFKB1/NFKBIA/STAT1/TNF/TNFAIP3/PLCB1/GBP5                                                                                                                                                                                                                                                                                                                                                                                                    | 10 |
| TRAC     | 1.006623803 | 1.80E-199 | Cyto_CD8.T_IL7R | C-type lectin receptor signaling pathway                      | 0.010022602 | JUN/NFKB1/NFKB2/NFKBIA/STAT1/TNF/IL23A                                                                                                                                                                                                                                                                                                                                                                                                                      | 7  |
| RPS2     | 0.622027068 | 2.64E-194 | Cyto_CD8.T_IL7R | Primary immunodeficiency                                      | 0.010944618 | CD3D/CD3E/CD8A/IL7R                                                                                                                                                                                                                                                                                                                                                                                                                                         | 4  |
| RPS18    | 0.743710666 | 1.07E-185 | Cyto_CD8.T_IL7R | JAK-STAT signaling pathway                                    | 0.012459548 | BCL2/IFNGR1/IL7R/PIM1/STAT1/STAT4/SOCS3/IL23A/IL23R                                                                                                                                                                                                                                                                                                                                                                                                         | 9  |
| RPS6     | 0.706366658 | 6.46E-182 | Cyto_CD8.T_IL7R | Transcriptional misregulation in cancer                       | 0.0132107   | BIRC3/BCL2A1/HPGD/MAF/NFKB1/REL/TRAFF1/ZBTB16/NFKBIZ/BCL11B                                                                                                                                                                                                                                                                                                                                                                                                 | 10 |
| GPR65    | 1.015351655 | 2.14E-179 | Cyto_CD8.T_IL7R | Toxoplasmosis                                                 | 0.014673454 | BIRC3/BCL2/IFNGR1/NFKB1/NFKBIA/STAT1/TNF                                                                                                                                                                                                                                                                                                                                                                                                                    | 7  |
| RPS9     | 0.690426171 | 9.77E-177 | Cyto_CD8.T_IL7R | Type I diabetes mellitus                                      | 0.016745034 | FAS/CD28/LTA/TNF                                                                                                                                                                                                                                                                                                                                                                                                                                            | 4  |
| KLRG1    | 0.863707025 | 1.42E-176 | Cyto_CD8.T_IL7R | Rheumatoid arthritis                                          | 0.020170292 | CD28/JUN/LTB/CCL3L1/TNF/IL23A                                                                                                                                                                                                                                                                                                                                                                                                                               | 6  |
| CAMK4    | 0.46396457  | 8.59E-174 | Cyto_CD8.T_IL7R | Shigellosis                                                   | 0.027446375 | BCL2/CD44/JUN/NFKB1/NFKBIA/RPS27A/TNF/UBA52/FNBP1/PLCB1/TIFA                                                                                                                                                                                                                                                                                                                                                                                                | 11 |
| CA2      | 0.397101993 | 8.12E-173 | Cyto_CD8.T_IL7R | Viral protein interaction with cytokine and cytokine receptor | 0.027682962 | CCR6/LTA/CCL3L1/TNF/CXCR4/IL18RAP                                                                                                                                                                                                                                                                                                                                                                                                                           | 6  |
| RPL32    | 0.537062627 | 8.47E-171 | Cyto_CD8.T_IL7R | Hepatitis C                                                   | 0.028528756 | FAS/EIF3E/NFKB1/NFKBIA/STAT1/TNF/YWHAH/SOCS3                                                                                                                                                                                                                                                                                                                                                                                                                | 8  |
| RPS23    | 0.52727233  | 2.61E-169 | Cyto_CD8.T_IL7R | Necroptosis                                                   | 0.030452923 | BIRC3/FAS/BCL2/IFNGR1/STAT1/STAT4/TNF/TNFAIP3                                                                                                                                                                                                                                                                                                                                                                                                               | 8  |
| RPS8     | 0.566342672 | 1.72E-168 | Cyto_CD8.T_IL7R | Human T-cell leukemia virus 1 infection                       | 0.032425868 | CD3D/CD3E/CD3G/JUN/LTA/NFKB1/NFKB2/NFKBIA/RANBP1/TNF                                                                                                                                                                                                                                                                                                                                                                                                        | 10 |
| PHACTR2  | 0.609225548 | 1.54E-167 | Cyto_CD8.T_IL7R | Toll-like receptor signaling pathway                          | 0.032711596 | JUN/NFKB1/NFKBIA/CCL3L1/STAT1/TNF                                                                                                                                                                                                                                                                                                                                                                                                                           | 6  |
| RPL10A   | 0.657411564 | 2.74E-167 | Cyto_CD8.T_IL7R | Hepatitis B                                                   | 0.033503923 | FAS/BCL2/JUN/NFKB1/NFKBIA/STAT1/STAT4/TNF                                                                                                                                                                                                                                                                                                                                                                                                                   | 8  |



|           |             |           |                 |                        |             |                                                                            |    |
|-----------|-------------|-----------|-----------------|------------------------|-------------|----------------------------------------------------------------------------|----|
| NCR3      | 0.872300044 | 6.26E-166 | Cyto_CD8.T_IL7R | Circadian rhythm       | 0.033751648 | RORA/RORC/BHLHE40                                                          | 3  |
| RPL27A    | 0.861306703 | 3.53E-165 | Cyto_CD8.T_IL7R | MAPK signaling pathway | 0.038978667 | FAS/DUSP5/FLT3LG/NR4A1/JUN/NFKB1/NFKB2/PAK2/RPS6KA3/<br>TNF/RASGRP1/DUSP16 | 12 |
| RPLP0     | 0.743541416 | 1.45E-163 | Cyto_CD8.T_IL7R |                        |             |                                                                            |    |
| RPL26     | 0.552032523 | 6.20E-155 | Cyto_CD8.T_IL7R |                        |             |                                                                            |    |
| RPLP1     | 0.493404172 | 7.99E-154 | Cyto_CD8.T_IL7R |                        |             |                                                                            |    |
| JAML      | 0.479759306 | 6.18E-150 | Cyto_CD8.T_IL7R |                        |             |                                                                            |    |
| ME1       | 0.279163965 | 3.88E-148 | Cyto_CD8.T_IL7R |                        |             |                                                                            |    |
| RPL21     | 0.586383775 | 1.14E-147 | Cyto_CD8.T_IL7R |                        |             |                                                                            |    |
| RPL18A    | 0.517109784 | 2.99E-142 | Cyto_CD8.T_IL7R |                        |             |                                                                            |    |
| RPS12     | 0.499443407 | 6.47E-140 | Cyto_CD8.T_IL7R |                        |             |                                                                            |    |
| RPS16     | 0.560809116 | 8.54E-140 | Cyto_CD8.T_IL7R |                        |             |                                                                            |    |
| RPS14     | 0.497767388 | 1.74E-137 | Cyto_CD8.T_IL7R |                        |             |                                                                            |    |
| RPL10     | 0.421595443 | 6.14E-134 | Cyto_CD8.T_IL7R |                        |             |                                                                            |    |
| TNFAIP3   | 0.956061716 | 8.44E-134 | Cyto_CD8.T_IL7R |                        |             |                                                                            |    |
| CD52      | 0.676291251 | 2.83E-133 | Cyto_CD8.T_IL7R |                        |             |                                                                            |    |
| PDE4D     | 0.707967604 | 5.54E-128 | Cyto_CD8.T_IL7R |                        |             |                                                                            |    |
| RPS29     | 0.557016142 | 3.44E-127 | Cyto_CD8.T_IL7R |                        |             |                                                                            |    |
| RPL34     | 0.4715373   | 1.83E-125 | Cyto_CD8.T_IL7R |                        |             |                                                                            |    |
| FEZ1      | 0.695479786 | 1.30E-124 | Cyto_CD8.T_IL7R |                        |             |                                                                            |    |
| RPS4X     | 0.454780437 | 3.36E-122 | Cyto_CD8.T_IL7R |                        |             |                                                                            |    |
| GPR171    | 0.562706434 | 4.91E-122 | Cyto_CD8.T_IL7R |                        |             |                                                                            |    |
| RPS20     | 0.685309853 | 1.59E-121 | Cyto_CD8.T_IL7R |                        |             |                                                                            |    |
| RPL15     | 0.470315792 | 9.65E-121 | Cyto_CD8.T_IL7R |                        |             |                                                                            |    |
| RPL9      | 0.520436284 | 2.52E-120 | Cyto_CD8.T_IL7R |                        |             |                                                                            |    |
| SPOCK2    | 0.641926095 | 4.65E-120 | Cyto_CD8.T_IL7R |                        |             |                                                                            |    |
| RPS13     | 0.444061412 | 5.89E-118 | Cyto_CD8.T_IL7R |                        |             |                                                                            |    |
| RCAN3     | 0.486826872 | 3.77E-116 | Cyto_CD8.T_IL7R |                        |             |                                                                            |    |
| CD8A      | 0.683128553 | 8.39E-116 | Cyto_CD8.T_IL7R |                        |             |                                                                            |    |
| FURIN     | 0.448161617 | 2.37E-113 | Cyto_CD8.T_IL7R |                        |             |                                                                            |    |
| RPL13A    | 0.573209417 | 3.29E-113 | Cyto_CD8.T_IL7R |                        |             |                                                                            |    |
| LINC01871 | 0.6819128   | 1.01E-110 | Cyto_CD8.T_IL7R |                        |             |                                                                            |    |
| PBX4      | 0.348729306 | 2.10E-110 | Cyto_CD8.T_IL7R |                        |             |                                                                            |    |
| RPL28     | 0.396654009 | 2.50E-110 | Cyto_CD8.T_IL7R |                        |             |                                                                            |    |
| RPS5      | 0.488818595 | 2.91E-110 | Cyto_CD8.T_IL7R |                        |             |                                                                            |    |
| RPS19     | 0.531123845 | 4.55E-110 | Cyto_CD8.T_IL7R |                        |             |                                                                            |    |
| RPS25     | 0.452218766 | 5.24E-109 | Cyto_CD8.T_IL7R |                        |             |                                                                            |    |
| RPS27A    | 0.365529543 | 1.35E-108 | Cyto_CD8.T_IL7R |                        |             |                                                                            |    |
| CD3D      | 0.674361211 | 1.93E-107 | Cyto_CD8.T_IL7R |                        |             |                                                                            |    |
| IL23A     | 0.283122439 | 2.17E-106 | Cyto_CD8.T_IL7R |                        |             |                                                                            |    |
| HPGD      | 0.314926168 | 3.22E-105 | Cyto_CD8.T_IL7R |                        |             |                                                                            |    |
| SERPINB9  | 0.771331511 | 7.88E-105 | Cyto_CD8.T_IL7R |                        |             |                                                                            |    |
| RORA      | 0.74860601  | 9.47E-105 | Cyto_CD8.T_IL7R |                        |             |                                                                            |    |
| RPL23     | 0.606667572 | 5.61E-104 | Cyto_CD8.T_IL7R |                        |             |                                                                            |    |
| RPS3A     | 0.411604082 | 4.40E-101 | Cyto_CD8.T_IL7R |                        |             |                                                                            |    |
| RPL23A    | 0.469912484 | 9.75E-101 | Cyto_CD8.T_IL7R |                        |             |                                                                            |    |
| TNF       | 0.576567435 | 3.36E-100 | Cyto_CD8.T_IL7R |                        |             |                                                                            |    |
| RPS11     | 0.553874368 | 4.01E-100 | Cyto_CD8.T_IL7R |                        |             |                                                                            |    |
| RPL19     | 0.365958881 | 1.76E-96  | Cyto_CD8.T_IL7R |                        |             |                                                                            |    |
| EEF1B2    | 0.517896284 | 9.50E-95  | Cyto_CD8.T_IL7R |                        |             |                                                                            |    |
| RPL37A    | 0.5056979   | 8.21E-94  | Cyto_CD8.T_IL7R |                        |             |                                                                            |    |
| PFKFB3    | 0.529622167 | 4.96E-93  | Cyto_CD8.T_IL7R |                        |             |                                                                            |    |
| RPL37     | 0.400186788 | 4.79E-92  | Cyto_CD8.T_IL7R |                        |             |                                                                            |    |
| SLC7A5    | 0.568182052 | 1.06E-91  | Cyto_CD8.T_IL7R |                        |             |                                                                            |    |
| SPTY2D1   | 0.559420863 | 5.80E-90  | Cyto_CD8.T_IL7R |                        |             |                                                                            |    |
| SNHG16    | 0.605481614 | 5.90E-89  | Cyto_CD8.T_IL7R |                        |             |                                                                            |    |
| TRGC2     | 0.563621661 | 8.80E-88  | Cyto_CD8.T_IL7R |                        |             |                                                                            |    |
| CD160     | 0.584921244 | 2.02E-87  | Cyto_CD8.T_IL7R |                        |             |                                                                            |    |
| G3BP2     | 0.604786351 | 2.08E-87  | Cyto_CD8.T_IL7R |                        |             |                                                                            |    |
| PTMS      | 0.552159265 | 4.10E-86  | Cyto_CD8.T_IL7R |                        |             |                                                                            |    |
| RPL35A    | 0.387424001 | 2.83E-85  | Cyto_CD8.T_IL7R |                        |             |                                                                            |    |
| RPL12     | 0.39239082  | 1.05E-84  | Cyto_CD8.T_IL7R |                        |             |                                                                            |    |
| RPSA      | 0.453288056 | 1.09E-84  | Cyto_CD8.T_IL7R |                        |             |                                                                            |    |
| RPL36A    | 0.489435324 | 5.10E-84  | Cyto_CD8.T_IL7R |                        |             |                                                                            |    |

|            |             |          |                 |
|------------|-------------|----------|-----------------|
| RPL29      | 0.369198043 | 5.13E-84 | Cyto_CD8.T_IL7R |
| NFKBIZ     | 0.650757922 | 4.22E-83 | Cyto_CD8.T_IL7R |
| AC253572.2 | 0.721543212 | 4.57E-83 | Cyto_CD8.T_IL7R |
| SATB1      | 0.573401243 | 3.43E-82 | Cyto_CD8.T_IL7R |
| ODF2L      | 0.506979742 | 3.07E-81 | Cyto_CD8.T_IL7R |
| APOL3      | 0.435423094 | 7.01E-81 | Cyto_CD8.T_IL7R |
| EEF1G      | 0.495176583 | 1.06E-80 | Cyto_CD8.T_IL7R |
| RPL18      | 0.339917741 | 2.72E-80 | Cyto_CD8.T_IL7R |
| COLQ       | 0.254056208 | 1.28E-79 | Cyto_CD8.T_IL7R |
| STAT1      | 0.62645859  | 1.98E-79 | Cyto_CD8.T_IL7R |
| SYNGAP1    | 0.268053664 | 2.50E-79 | Cyto_CD8.T_IL7R |
| RPL30      | 0.3137648   | 4.40E-78 | Cyto_CD8.T_IL7R |
| AC007952.4 | 0.342163224 | 1.01E-76 | Cyto_CD8.T_IL7R |
| GNA15      | 0.257827834 | 1.46E-76 | Cyto_CD8.T_IL7R |
| AC245014.3 | 0.395729172 | 1.99E-76 | Cyto_CD8.T_IL7R |
| CD27       | 0.335699743 | 1.45E-75 | Cyto_CD8.T_IL7R |
| IKZF2      | 0.37156269  | 1.49E-75 | Cyto_CD8.T_IL7R |
| CCSAP      | 0.316449106 | 2.67E-74 | Cyto_CD8.T_IL7R |
| SNX9       | 0.266479444 | 3.48E-74 | Cyto_CD8.T_IL7R |
| FLT3LG     | 0.359932473 | 2.44E-73 | Cyto_CD8.T_IL7R |
| GPR35      | 0.452852569 | 9.50E-73 | Cyto_CD8.T_IL7R |
| RPL5       | 0.338654476 | 7.82E-71 | Cyto_CD8.T_IL7R |
| TRAT1      | 0.346871763 | 2.81E-70 | Cyto_CD8.T_IL7R |
| RPS21      | 0.344140246 | 5.52E-70 | Cyto_CD8.T_IL7R |
| RPS24      | 0.319349213 | 1.27E-69 | Cyto_CD8.T_IL7R |
| TTC39C     | 0.373304518 | 2.71E-69 | Cyto_CD8.T_IL7R |
| RPS3       | 0.309129966 | 3.19E-69 | Cyto_CD8.T_IL7R |
| S100A4     | 0.427171965 | 4.18E-69 | Cyto_CD8.T_IL7R |
| RPL41      | 0.307022659 | 1.48E-67 | Cyto_CD8.T_IL7R |
| CD6        | 0.370412752 | 1.51E-67 | Cyto_CD8.T_IL7R |
| ZDBF2      | 0.361960593 | 5.84E-67 | Cyto_CD8.T_IL7R |
| RPL7       | 0.439169792 | 7.09E-67 | Cyto_CD8.T_IL7R |
| ZBTB16     | 0.383487912 | 1.19E-66 | Cyto_CD8.T_IL7R |
| FAS        | 0.441673999 | 7.07E-66 | Cyto_CD8.T_IL7R |
| CXCR6      | 0.457483229 | 1.35E-64 | Cyto_CD8.T_IL7R |
| GTF3C1     | 0.40111419  | 1.36E-64 | Cyto_CD8.T_IL7R |
| UBA52      | 0.356990425 | 2.99E-64 | Cyto_CD8.T_IL7R |
| CD3G       | 0.415485796 | 3.09E-64 | Cyto_CD8.T_IL7R |
| NFKBIA     | 0.769868167 | 5.84E-64 | Cyto_CD8.T_IL7R |
| RPL8       | 0.317889122 | 7.13E-64 | Cyto_CD8.T_IL7R |
| CERK       | 0.289888186 | 1.73E-62 | Cyto_CD8.T_IL7R |
| SNHG8      | 0.449327786 | 2.91E-62 | Cyto_CD8.T_IL7R |
| LCP1       | 0.521795283 | 6.86E-62 | Cyto_CD8.T_IL7R |
| RPL4       | 0.428197075 | 1.13E-61 | Cyto_CD8.T_IL7R |
| SIT1       | 0.339796544 | 1.74E-61 | Cyto_CD8.T_IL7R |
| JUN        | 0.662591242 | 4.64E-61 | Cyto_CD8.T_IL7R |
| TRBC2      | 0.468702395 | 4.73E-61 | Cyto_CD8.T_IL7R |
| NFKB1      | 0.637204164 | 6.56E-61 | Cyto_CD8.T_IL7R |
| BCL2       | 0.353765647 | 1.07E-60 | Cyto_CD8.T_IL7R |
| RACK1      | 0.334445723 | 6.88E-59 | Cyto_CD8.T_IL7R |
| GAS5       | 0.409259554 | 3.37E-58 | Cyto_CD8.T_IL7R |
| TRAF1      | 0.449881382 | 6.15E-58 | Cyto_CD8.T_IL7R |
| RPL27      | 0.383315188 | 1.09E-57 | Cyto_CD8.T_IL7R |
| RPL11      | 0.276351675 | 1.68E-57 | Cyto_CD8.T_IL7R |
| IFNGR1     | 0.462031651 | 2.29E-57 | Cyto_CD8.T_IL7R |
| CD2        | 0.428512827 | 2.59E-57 | Cyto_CD8.T_IL7R |
| CEBPD      | 0.514657446 | 3.15E-57 | Cyto_CD8.T_IL7R |
| RPL31      | 0.434888857 | 1.34E-56 | Cyto_CD8.T_IL7R |
| RPS6KA3    | 0.405804042 | 1.62E-56 | Cyto_CD8.T_IL7R |
| RPS27      | 0.294624058 | 1.72E-56 | Cyto_CD8.T_IL7R |
| RPS17      | 0.446946109 | 3.26E-56 | Cyto_CD8.T_IL7R |
| EIF3E      | 0.422014244 | 1.03E-55 | Cyto_CD8.T_IL7R |
| RPL36      | 0.331977744 | 1.13E-55 | Cyto_CD8.T_IL7R |
| ATF7IP2    | 0.273780243 | 1.25E-55 | Cyto_CD8.T_IL7R |

|          |             |          |                 |
|----------|-------------|----------|-----------------|
| IL32     | 0.461650822 | 1.37E-55 | Cyto_CD8.T_IL7R |
| RPL24    | 0.308665235 | 1.17E-53 | Cyto_CD8.T_IL7R |
| BTG1     | 0.406360997 | 4.29E-53 | Cyto_CD8.T_IL7R |
| MDFIC    | 0.342274284 | 2.07E-52 | Cyto_CD8.T_IL7R |
| PIM3     | 0.503843002 | 2.21E-52 | Cyto_CD8.T_IL7R |
| FKBP11   | 0.401649365 | 2.39E-52 | Cyto_CD8.T_IL7R |
| CD5      | 0.267429013 | 7.12E-52 | Cyto_CD8.T_IL7R |
| CD69     | 0.88941862  | 1.18E-51 | Cyto_CD8.T_IL7R |
| POU2F2   | 0.364150618 | 1.07E-50 | Cyto_CD8.T_IL7R |
| ABRACL   | 0.434574483 | 1.73E-50 | Cyto_CD8.T_IL7R |
| PLCB1    | 0.26940792  | 3.62E-50 | Cyto_CD8.T_IL7R |
| NUP62    | 0.305709898 | 5.30E-50 | Cyto_CD8.T_IL7R |
| SOCS3    | 0.314502265 | 3.51E-49 | Cyto_CD8.T_IL7R |
| RPL35    | 0.340601543 | 4.63E-49 | Cyto_CD8.T_IL7R |
| EML4     | 0.410494038 | 2.20E-48 | Cyto_CD8.T_IL7R |
| GPRIN3   | 0.378136865 | 8.66E-48 | Cyto_CD8.T_IL7R |
| DDX21    | 0.39357793  | 1.52E-46 | Cyto_CD8.T_IL7R |
| BIRC3    | 0.542572934 | 2.15E-46 | Cyto_CD8.T_IL7R |
| CCNG2    | 0.330320625 | 6.60E-45 | Cyto_CD8.T_IL7R |
| RPLP2    | 0.261361001 | 2.57E-43 | Cyto_CD8.T_IL7R |
| NINJ1    | 0.366413395 | 4.05E-43 | Cyto_CD8.T_IL7R |
| FNBP1    | 0.389065086 | 7.49E-43 | Cyto_CD8.T_IL7R |
| SYTL2    | 0.293324891 | 7.74E-43 | Cyto_CD8.T_IL7R |
| ZFAS1    | 0.383383978 | 1.49E-42 | Cyto_CD8.T_IL7R |
| OSTC     | 0.312918665 | 2.03E-42 | Cyto_CD8.T_IL7R |
| TNFRSF18 | 0.316790371 | 3.98E-42 | Cyto_CD8.T_IL7R |
| RPL38    | 0.351141189 | 4.02E-42 | Cyto_CD8.T_IL7R |
| PPA1     | 0.331248241 | 4.39E-42 | Cyto_CD8.T_IL7R |
| CD96     | 0.375325335 | 5.05E-42 | Cyto_CD8.T_IL7R |
| ZNF267   | 0.387282659 | 1.71E-41 | Cyto_CD8.T_IL7R |
| PHLDA1   | 0.362728658 | 1.85E-41 | Cyto_CD8.T_IL7R |
| SEC14L1  | 0.312447456 | 3.25E-41 | Cyto_CD8.T_IL7R |
| GBP5     | 0.376233122 | 7.13E-41 | Cyto_CD8.T_IL7R |
| CD48     | 0.375307901 | 1.09E-40 | Cyto_CD8.T_IL7R |
| PDCD4    | 0.367675398 | 4.85E-40 | Cyto_CD8.T_IL7R |
| TRIM69   | 0.259804265 | 9.13E-40 | Cyto_CD8.T_IL7R |
| CD3E     | 0.322684116 | 1.41E-39 | Cyto_CD8.T_IL7R |
| MT-ND5   | 0.403463652 | 6.95E-39 | Cyto_CD8.T_IL7R |
| PBXIP1   | 0.30883877  | 7.04E-39 | Cyto_CD8.T_IL7R |
| MT-ND1   | 0.277029023 | 7.64E-39 | Cyto_CD8.T_IL7R |
| RPL22    | 0.290440692 | 4.09E-38 | Cyto_CD8.T_IL7R |
| MT-ND2   | 0.341329496 | 4.45E-38 | Cyto_CD8.T_IL7R |
| LAPTM5   | 0.356508488 | 5.35E-38 | Cyto_CD8.T_IL7R |
| PRR5     | 0.269651808 | 9.35E-38 | Cyto_CD8.T_IL7R |
| IL18RAP  | 0.251485622 | 1.34E-37 | Cyto_CD8.T_IL7R |
| PAK2     | 0.351537784 | 2.43E-37 | Cyto_CD8.T_IL7R |
| TIFA     | 0.325579724 | 3.27E-37 | Cyto_CD8.T_IL7R |
| RPL6     | 0.253587545 | 3.39E-37 | Cyto_CD8.T_IL7R |
| CD83     | 0.47452472  | 4.08E-37 | Cyto_CD8.T_IL7R |
| DYNLT3   | 0.269829064 | 6.08E-37 | Cyto_CD8.T_IL7R |
| RAPGEF6  | 0.288092729 | 8.55E-37 | Cyto_CD8.T_IL7R |
| HNRNPA1  | 0.340349064 | 1.60E-36 | Cyto_CD8.T_IL7R |
| PAG1     | 0.267482769 | 1.91E-36 | Cyto_CD8.T_IL7R |
| LTA      | 0.340887099 | 2.46E-36 | Cyto_CD8.T_IL7R |
| CD44     | 0.310562304 | 9.70E-36 | Cyto_CD8.T_IL7R |
| NPM1     | 0.304187183 | 1.96E-35 | Cyto_CD8.T_IL7R |
| SNHG5    | 0.328254355 | 2.05E-35 | Cyto_CD8.T_IL7R |
| NAP1L1   | 0.34675926  | 2.39E-35 | Cyto_CD8.T_IL7R |
| YWHAH    | 0.26947238  | 2.74E-35 | Cyto_CD8.T_IL7R |
| MT-ND3   | 0.304023232 | 1.01E-34 | Cyto_CD8.T_IL7R |
| RAB18    | 0.269755433 | 1.98E-34 | Cyto_CD8.T_IL7R |
| CD70     | 0.264685709 | 2.77E-34 | Cyto_CD8.T_IL7R |
| SNHG6    | 0.317316769 | 3.59E-34 | Cyto_CD8.T_IL7R |
| BCL2A1   | 0.563716648 | 5.08E-34 | Cyto_CD8.T_IL7R |

|            |             |          |                 |
|------------|-------------|----------|-----------------|
| HIVEP2     | 0.256592247 | 3.01E-33 | Cyto_CD8.T_IL7R |
| NOP53      | 0.310987719 | 3.17E-33 | Cyto_CD8.T_IL7R |
| AC020916.1 | 0.436304961 | 3.35E-33 | Cyto_CD8.T_IL7R |
| RASGRP1    | 0.303664421 | 5.00E-33 | Cyto_CD8.T_IL7R |
| PABPC1     | 0.362155917 | 2.07E-32 | Cyto_CD8.T_IL7R |
| MGAT4A     | 0.297761113 | 3.07E-32 | Cyto_CD8.T_IL7R |
| PARP8      | 0.296920291 | 3.08E-32 | Cyto_CD8.T_IL7R |
| IGFLR1     | 0.301564792 | 3.16E-32 | Cyto_CD8.T_IL7R |
| LAG3       | 0.274362195 | 3.19E-32 | Cyto_CD8.T_IL7R |
| SRSF7      | 0.354190514 | 1.98E-31 | Cyto_CD8.T_IL7R |
| IER3       | 0.419580621 | 2.42E-31 | Cyto_CD8.T_IL7R |
| MYBL1      | 0.328266521 | 2.44E-31 | Cyto_CD8.T_IL7R |
| CCDC107    | 0.309054528 | 2.89E-31 | Cyto_CD8.T_IL7R |
| TMEM123    | 0.266611458 | 4.65E-31 | Cyto_CD8.T_IL7R |
| PFDN5      | 0.272271311 | 8.44E-31 | Cyto_CD8.T_IL7R |
| TC2N       | 0.276873336 | 1.39E-30 | Cyto_CD8.T_IL7R |
| RPL22L1    | 0.326635875 | 1.48E-30 | Cyto_CD8.T_IL7R |
| NFAT5      | 0.285991575 | 3.34E-30 | Cyto_CD8.T_IL7R |
| VIM        | 0.343888235 | 6.85E-30 | Cyto_CD8.T_IL7R |
| MAF        | 0.300453078 | 8.98E-30 | Cyto_CD8.T_IL7R |
| CKLF       | 0.31079387  | 1.64E-29 | Cyto_CD8.T_IL7R |
| HNRNPC     | 0.310261898 | 3.92E-29 | Cyto_CD8.T_IL7R |
| EMB        | 0.292870664 | 1.48E-28 | Cyto_CD8.T_IL7R |
| RGS2       | 0.397106727 | 1.72E-28 | Cyto_CD8.T_IL7R |
| PIM1       | 0.30239415  | 3.09E-28 | Cyto_CD8.T_IL7R |
| CLINT1     | 0.260048238 | 6.93E-28 | Cyto_CD8.T_IL7R |
| BTG2       | 0.479643927 | 5.21E-27 | Cyto_CD8.T_IL7R |
| KDM6B      | 0.31757169  | 1.01E-26 | Cyto_CD8.T_IL7R |
| NDUFV2     | 0.295624835 | 1.02E-26 | Cyto_CD8.T_IL7R |
| S100A6     | 0.292126968 | 1.96E-26 | Cyto_CD8.T_IL7R |
| NR4A1      | 0.391249996 | 2.18E-26 | Cyto_CD8.T_IL7R |
| TERF2IP    | 0.31137882  | 2.48E-26 | Cyto_CD8.T_IL7R |
| SMAP2      | 0.293664647 | 2.80E-26 | Cyto_CD8.T_IL7R |
| RANBP1     | 0.260449527 | 5.16E-26 | Cyto_CD8.T_IL7R |
| NSUN6      | 0.264536055 | 5.79E-26 | Cyto_CD8.T_IL7R |
| INTS6      | 0.309724884 | 2.04E-25 | Cyto_CD8.T_IL7R |
| NFKB2      | 0.264290268 | 3.48E-25 | Cyto_CD8.T_IL7R |
| TOMM20     | 0.269701563 | 4.53E-25 | Cyto_CD8.T_IL7R |
| CYB5A      | 0.250924136 | 6.21E-25 | Cyto_CD8.T_IL7R |
| JUNB       | 0.375968042 | 6.53E-25 | Cyto_CD8.T_IL7R |
| CXCR4      | 0.386337625 | 7.18E-25 | Cyto_CD8.T_IL7R |
| SYNE2      | 0.331009119 | 7.33E-25 | Cyto_CD8.T_IL7R |
| EIF3H      | 0.27942358  | 1.10E-24 | Cyto_CD8.T_IL7R |
| DUSP5      | 0.324385977 | 5.07E-24 | Cyto_CD8.T_IL7R |
| HOPX       | 0.286215591 | 6.01E-24 | Cyto_CD8.T_IL7R |
| SERBP1     | 0.284886245 | 1.26E-23 | Cyto_CD8.T_IL7R |
| ANKRD12    | 0.330667754 | 3.76E-23 | Cyto_CD8.T_IL7R |
| BCL11B     | 0.275482797 | 4.44E-23 | Cyto_CD8.T_IL7R |
| ANP32E     | 0.250259225 | 1.18E-22 | Cyto_CD8.T_IL7R |
| CCNI       | 0.268083467 | 1.98E-22 | Cyto_CD8.T_IL7R |
| STAT4      | 0.270565514 | 3.13E-22 | Cyto_CD8.T_IL7R |
| CCL3L1     | 0.648185921 | 3.88E-22 | Cyto_CD8.T_IL7R |
| SPCS3      | 0.261904626 | 9.78E-22 | Cyto_CD8.T_IL7R |
| EIF5A      | 0.273660966 | 1.31E-21 | Cyto_CD8.T_IL7R |
| SELENOH    | 0.26224159  | 1.91E-21 | Cyto_CD8.T_IL7R |
| RNF19A     | 0.335877555 | 1.94E-21 | Cyto_CD8.T_IL7R |
| VPS13C     | 0.262933785 | 2.05E-21 | Cyto_CD8.T_IL7R |
| BHLHE40    | 0.286780383 | 1.26E-20 | Cyto_CD8.T_IL7R |
| GSPT1      | 0.271617525 | 5.07E-20 | Cyto_CD8.T_IL7R |
| CUTA       | 0.263877675 | 4.96E-19 | Cyto_CD8.T_IL7R |
| GPX4       | 0.264354501 | 3.57E-18 | Cyto_CD8.T_IL7R |
| GLIPR1     | 0.264759086 | 1.12E-16 | Cyto_CD8.T_IL7R |
| EZR        | 0.252211045 | 3.88E-16 | Cyto_CD8.T_IL7R |
| PDE4B      | 0.251435695 | 8.21E-16 | Cyto_CD8.T_IL7R |

|          |             |             |                 |
|----------|-------------|-------------|-----------------|
| REL      | 0.271632641 | 3.07E-14    | Cyto_CD8.T_IL7R |
| PPP1R15A | 0.313526265 | 3.33E-13    | Cyto_CD8.T_IL7R |
| TWISTNB  | 0.269632225 | 0.001449079 | Cyto_CD8.T_IL7R |

f. Cyto\_CD8.T\_IL7R\_CCL20

| Gene symbol | avg_log2FC  | p_val_adj | Upregulated group     | Description                                            | pvalue      | geneID                                                                                                                                                                                                                                                                                                                                                                                                                                     | Count |
|-------------|-------------|-----------|-----------------------|--------------------------------------------------------|-------------|--------------------------------------------------------------------------------------------------------------------------------------------------------------------------------------------------------------------------------------------------------------------------------------------------------------------------------------------------------------------------------------------------------------------------------------------|-------|
| CCL20       | 5.305285998 | 0         | Cyto_CD8.T_IL7R_CCL20 | Ribosome                                               | 2.96E-66    | RPSA/RPL10A/RPL3/RPL4/RPL5/RPL7/RPL8/RPL9/RPL10/RPL12/RPL13/RPL15/RPL17/RPL18/RPL18A/RPL19/RPL21/RPL23A/RPL24/RPL26/RPL27/RPL30/RPL28/RPL29/RPL31/RPL32/RPL34/RPL35A/RPL37/RPL37A/RPL38/RPL41/RPL36A/RPLP0/RPLP1/RPS2/RPS3/RPS3A/RPS4X/RPS5/RPS6/RPS8/RPS9/RPS11/RPS12/RPS13/RPS14/RPS16/RPS17/RPS18/RPS19/RPS20/RPS21/RPS23/RPS24/RPS25/RPS27/RPS27A/RPS29/UBA52/RPL23/RPL35/RPL13A/RPL36/RPL22L1                                         | 66    |
| IL7R        | 1.646358464 | 0         | Cyto_CD8.T_IL7R_CCL20 | Coronavirus disease - COVID-19                         | 1.32E-61    | JUN/RPSA/RPL10A/NFKB1/NFKBIA/RPL3/RPL4/RPL5/RPL7/RPL8/RPL9/RPL10/RPL12/RPL13/RPL15/RPL17/RPL18/RPL18A/RPL19/RPL21/RPL23A/RPL24/RPL26/RPL27/RPL30/RPL27A/RPL28/RPL29/RPL31/RPL32/RPL34/RPL35A/RPL37/RPL37A/RPL38/RPL41/RPL36A/RPLP0/RPLP1/RPS2/RPS3/RPS3A/RPS4X/RPS5/RPS6/RPS8/RPS9/RPS11/RPS12/RPS13/RPS14/RPS16/RPS17/RPS18/RPS19/RPS20/RPS21/RPS23/RPS24/RPS25/RPS27/RPS27A/RPS29/STAT1/TNF/UBA52/RPL23/ISG15/RPL35/RPL13A/RPL36/RPL22L1 | 72    |
| IL411       | 1.070697941 | 0         | Cyto_CD8.T_IL7R_CCL20 | NF-kappa B signaling pathway                           | 3.16E-07    | BIRC2/BIRC3/BCL2/BCL2A1/LTA/LTB/NFKB1/NFKB2/NFKBIA/RELB/TNF/TNFAIP3/TRAF1/CCL4L2                                                                                                                                                                                                                                                                                                                                                           | 14    |
| CCR6        | 0.751618908 | 0         | Cyto_CD8.T_IL7R_CCL20 | Inflammatory bowel disease                             | 5.83E-07    | IFNGR1/JUN/SMAD3/NFKB1/RORA/RORC/STAT1/STAT4/TNF/IL23A/IL23R                                                                                                                                                                                                                                                                                                                                                                               | 11    |
| SLC4A10     | 0.749470841 | 0         | Cyto_CD8.T_IL7R_CCL20 | TNF signaling pathway                                  | 7.99E-07    | BIRC2/BIRC3/FAS/CREB1/JUN/JUNB/LTA/NFKB1/NFKBIA/CCL20/TNF/TNFAIP3/TRAF1/SOCS3                                                                                                                                                                                                                                                                                                                                                              | 14    |
| LTB         | 2.082150887 | 2.31E-278 | Cyto_CD8.T_IL7R_CCL20 | Th17 cell differentiation                              | 3.08E-06    | CD3D/CD3G/HSP90AB1/IFNGR1/JUN/SMAD3/NFKB1/NFKBIA/RORA/RORC/STAT1/IL23A/IL23R                                                                                                                                                                                                                                                                                                                                                               | 13    |
| RORC        | 0.546272457 | 1.09E-271 | Cyto_CD8.T_IL7R_CCL20 | Epstein-Barr virus infection                           | 3.36E-06    | FAS/BCL2/CD3D/CD3G/CD44/CDKN1A/HLA-A/JUN/MYC/NFKB1/NFKB2/NFKBIA/RELB/STAT1/TNF/TNFAIP3/VI                                                                                                                                                                                                                                                                                                                                                  | 18    |
| TPT1        | 0.847418133 | 7.52E-219 | Cyto_CD8.T_IL7R_CCL20 | Osteoclast differentiation                             | 2.03E-05    | M/ISG15                                                                                                                                                                                                                                                                                                                                                                                                                                    | 13    |
| GPR65       | 1.254553071 | 4.15E-204 | Cyto_CD8.T_IL7R_CCL20 | PD-L1 expression and PD-1 checkpoint pathway in cancer | 7.93E-05    | CAMK4/CREB1/IFNGR1/JUN/JUNB/JUND/NFKB1/NFKB2/NFKBIA/RELB/STAT1/TNF/SOCS3                                                                                                                                                                                                                                                                                                                                                                   | 10    |
| SLC7A5      | 0.855038062 | 1.22E-199 | Cyto_CD8.T_IL7R_CCL20 | Cytokine-cytokine receptor interaction                 | 0.000171078 | CD3D/CD3G/CD28/IFNGR1/JUN/NFKB1/NFKBIA/STAT1/RASGRP1/EML4                                                                                                                                                                                                                                                                                                                                                                                  | 19    |
| KLRB1       | 1.220333975 | 1.55E-198 | Cyto_CD8.T_IL7R_CCL20 | Measles                                                | 0.000205084 | FAS/BCL2/CD3D/CD3G/CD28/JUN/NFKB1/NFKBIA/SLAMF1/STAT1/TNFAIP3/RACK1                                                                                                                                                                                                                                                                                                                                                                        | 12    |
| CA2         | 0.437734369 | 1.41E-194 | Cyto_CD8.T_IL7R_CCL20 | Hepatitis B                                            | 0.000232501 | FAS/BCL2/CDKN1A/CREB1/DDX3X/JUN/SMAD3/MYC/NFKB1/NFKBIA/STAT1/STAT4/TNF                                                                                                                                                                                                                                                                                                                                                                     | 13    |
| AQP3        | 0.648816282 | 6.20E-162 | Cyto_CD8.T_IL7R_CCL20 | Chagas disease                                         | 0.000249378 | FAS/CD3D/CD3G/GNA15/IFNGR1/JUN/NFKB1/NFKBIA/CCL3L1/TNF                                                                                                                                                                                                                                                                                                                                                                                     | 10    |
| TNFRSF25    | 0.564021488 | 3.01E-154 | Cyto_CD8.T_IL7R_CCL20 | T cell receptor signaling pathway                      | 0.000292417 | CD3D/CD3G/CD8A/CD28/JUN/NFKB1/NFKBIA/PAK2/TNF/RASGRP1                                                                                                                                                                                                                                                                                                                                                                                      | 10    |
| PFKFB3      | 0.769587964 | 5.24E-151 | Cyto_CD8.T_IL7R_CCL20 | Human T-cell leukemia virus 1 infection                | 0.00050848  | CD3D/CD3G/CDKN1A/CREB1/HLA-A/JUN/LTA/SMAD3/MYC/NFKB1/NFKB2/NFKBIA/RANBP1/RELB/TNF                                                                                                                                                                                                                                                                                                                                                          | 15    |
| DUSP16      | 0.485943539 | 1.27E-150 | Cyto_CD8.T_IL7R_CCL20 | Small cell lung cancer                                 | 0.00051673  | BIRC2/BIRC3/BCL2/CDKN1A/MYC/NFKB1/NFKBIA/TRAF1/TRAF4                                                                                                                                                                                                                                                                                                                                                                                       | 9     |
| SERPINB9    | 1.103148487 | 6.10E-149 | Cyto_CD8.T_IL7R_CCL20 | IL-17 signaling pathway                                | 0.000605637 | HSP90AB1/JUN/JUND/NFKB1/NFKBIA/CCL20/TNF/TNFAIP3/TRAF4                                                                                                                                                                                                                                                                                                                                                                                     | 9     |
| TNFAIP3     | 1.113632138 | 4.94E-148 | Cyto_CD8.T_IL7R_CCL20 | Apoptosis                                              | 0.0006578   | BIRC2/BIRC3/FAS/BCL2/BCL2A1/JUN/MCL1/NFKB1/NFKBIA/TNF/TRAF1                                                                                                                                                                                                                                                                                                                                                                                | 11    |
| BCL2A1      | 1.252491058 | 5.71E-145 | Cyto_CD8.T_IL7R_CCL20 | JAK-STAT signaling pathway                             | 0.000830369 | BCL2/CDKN1A/IFNGR1/IL7R/MCL1/MYC/PIM1/STAT1/STAT4/SOCS3/IL23A/IL23R                                                                                                                                                                                                                                                                                                                                                                        | 12    |
| TNF         | 0.894704988 | 2.34E-142 | Cyto_CD8.T_IL7R_CCL20 | C-type lectin receptor signaling pathway               | 0.00125787  | PLK3/JUN/NFKB1/NFKB2/NFKBIA/RELB/STAT1/TNF/IL23A                                                                                                                                                                                                                                                                                                                                                                                           | 9     |
| EEF1A1      | 0.538197995 | 2.47E-140 | Cyto_CD8.T_IL7R_CCL20 | Viral carcinogenesis                                   | 0.002030891 | CDKN1A/CHD4/CREB1/DDX3X/HLA-A/JUN/NFKB1/NFKB2/NFKBIA/PKM/RANBP1/REL/TRAF1                                                                                                                                                                                                                                                                                                                                                                  | 13    |

|           |             |           |                       |                                                               |             |                                                                        |    |
|-----------|-------------|-----------|-----------------------|---------------------------------------------------------------|-------------|------------------------------------------------------------------------|----|
| RPL13     | 0.590077976 | 1.25E-137 | Cyto_CD8_T_IL7R_CCL20 | Th1 and Th2 cell differentiation                              | 0.00225897  | CD3D/CD3G/IFNGR1/JUN/NFKB1/NFKBIA/STAT1/STAT4                          | 8  |
| NFKBIZ    | 0.963823392 | 1.17E-135 | Cyto_CD8_T_IL7R_CCL20 | NOD-like receptor signaling pathway                           | 0.002475589 | BIRC2/BIRC3/BCL2/GBP2/HSP90AB1/JUN/NFKB1/NFKBIA/STAT1/TNF/TNFAIP3/GBP5 | 12 |
| IL23R     | 0.301518199 | 2.47E-135 | Cyto_CD8_T_IL7R_CCL20 | Legionellosis                                                 | 0.003075452 | EEF1A1/EEF1G/NFKB1/NFKB2/NFKBIA/TNF                                    | 6  |
| LST1      | 0.614252716 | 1.00E-133 | Cyto_CD8_T_IL7R_CCL20 | Leishmaniasis                                                 | 0.003284364 | EEF1A1/IFNGR1/JUN/NFKB1/NFKBIA/STAT1/TNF                               | 7  |
| IL23A     | 0.390889086 | 7.35E-133 | Cyto_CD8_T_IL7R_CCL20 | Transcriptional misregulation in cancer                       | 0.003511801 | BIRC2/BIRC3/BCL2A1/CCNT1/CDKN1A/HPGD/MYC/NFKB1/REL/T                   | 12 |
| NCR3      | 0.876457321 | 4.92E-130 | Cyto_CD8_T_IL7R_CCL20 | Hematopoietic cell lineage                                    | 0.003573669 | RAF1/ZBTB16/NFKBIZ                                                     | 8  |
| RPL32     | 0.538866397 | 5.96E-130 | Cyto_CD8_T_IL7R_CCL20 | Kaposi sarcoma-associated herpesvirus infection               | 0.003819201 | CD2/CD3D/CD3G/CD8A/CD44/FLT3LG/IL7R/TNF                                | 12 |
| RPL3      | 0.682094939 | 6.05E-126 | Cyto_CD8_T_IL7R_CCL20 | Type I diabetes mellitus                                      | 0.004416704 | FAS/CDKN1A/CREB1/HLA-A/IFNGR1/JUN/MYC/NFKB1/NFKBIA/RPS27A/STAT1/UBA52  | 5  |
| RPS6      | 0.662741684 | 1.09E-125 | Cyto_CD8_T_IL7R_CCL20 | Necroptosis                                                   | 0.007162489 | FAS/CD28/HLA-A/LTA/TNF                                                 | 10 |
| FURIN     | 0.502302399 | 1.41E-125 | Cyto_CD8_T_IL7R_CCL20 | Circadian rhythm                                              | 0.00742244  | BIRC2/BIRC3/BCL2/IFNGR1/NFKB1/NFKBIA/STAT1/TNF                         | 4  |
| RPS9      | 0.655376703 | 1.36E-121 | Cyto_CD8_T_IL7R_CCL20 | Toxoplasmosis                                                 | 0.007509028 | FAS/DUSP5/FLT3LG/NR4A1/JUN/JUND/MYC/NFKB1/NFKB2/PAK2                   | 8  |
| PHACTR2   | 0.598998824 | 1.41E-120 | Cyto_CD8_T_IL7R_CCL20 | MAPK signaling pathway                                        | 0.007792284 | /RELB/RPS6KA3/TNF/RASGRP1/DUSP16                                       | 15 |
| DPP4      | 0.305415822 | 1.21E-119 | Cyto_CD8_T_IL7R_CCL20 | Rheumatoid arthritis                                          | 0.009216772 | CD28/JUN/LTB/CCL3L1/CCL20/TNF/IL23A                                    | 7  |
| TRAC      | 0.834111126 | 1.69E-119 | Cyto_CD8_T_IL7R_CCL20 | Viral protein interaction with cytokine and cytokine receptor | 0.013434953 | CCR6/LTA/CCL3L1/CCL20/TNF/CXCR4/CCL4L2                                 | 7  |
| FEZ1      | 0.703033387 | 4.08E-119 | Cyto_CD8_T_IL7R_CCL20 | AGE-RAGE signaling pathway in diabetic complications          | 0.013434953 | BCL2/JUN/SMAD3/NFKB1/PIM1/STAT1/TNF                                    | 7  |
| KIF5C     | 0.319440857 | 8.69E-119 | Cyto_CD8_T_IL7R_CCL20 | Allograft rejection                                           | 0.015176193 | FAS/CD28/HLA-A/TNF                                                     | 4  |
| RPS18     | 0.674067376 | 3.58E-118 | Cyto_CD8_T_IL7R_CCL20 | Toll-like receptor signaling pathway                          | 0.016389301 | JUN/NFKB1/NFKBIA/CCL3L1/STAT1/TNF/CCL4L2                               | 7  |
| RORA      | 0.903872041 | 1.97E-117 | Cyto_CD8_T_IL7R_CCL20 | Hepatitis C                                                   | 0.018385539 | FAS/CDKN1A/EIF3E/MYC/NFKB1/NFKBIA/STAT1/TNF/SOCS3                      | 9  |
| RPS2      | 0.570724242 | 4.11E-116 | Cyto_CD8_T_IL7R_CCL20 | Human immunodeficiency virus 1 infection                      | 0.019073152 | FAS/BCL2/CD3D/CD3G/HLA-A/JUN/NFKB1/NFKBIA/PAK2/TNF/CXCR4               | 11 |
| NFKBIA    | 1.111031226 | 1.56E-114 | Cyto_CD8_T_IL7R_CCL20 | Graft-versus-host disease                                     | 0.021282432 | FAS/CD28/HLA-A/TNF                                                     | 4  |
| RPLP0     | 0.751722346 | 9.36E-114 | Cyto_CD8_T_IL7R_CCL20 | Salmonella infection                                          | 0.024651321 | BIRC2/BIRC3/BCL2/HSP90AB1/JUN/KIF5C/MYC/NFKB1/NFKBIA/R                 | 12 |
| NFKB1     | 0.949808218 | 1.08E-113 | Cyto_CD8_T_IL7R_CCL20 | Acute myeloid leukemia                                        | 0.027237702 | PS3/DYNLT3/TNF                                                         | 5  |
| RPS23     | 0.500136966 | 1.20E-113 | Cyto_CD8_T_IL7R_CCL20 | Human cytomegalovirus infection                               | 0.02809607  | BCL2A1/MYC/NFKB1/PIM1/ZBTB16                                           | 11 |
| PDE4D     | 0.754871279 | 2.63E-113 | Cyto_CD8_T_IL7R_CCL20 | RIG-I-like receptor signaling pathway                         | 0.032138135 | FAS/CDKN1A/CREB1/HLA-A/MYC/NFKB1/NFKBIA/CCL3L1/TNF/CXCR4/CCL4L2        | 6  |
| CD28      | 0.466033652 | 1.63E-111 | Cyto_CD8_T_IL7R_CCL20 | Prostate cancer                                               | 0.036549298 | DDX3X/NFKB1/NFKBIA/TNF/ISG15                                           | 5  |
| SLAMF1    | 0.461175926 | 1.92E-110 | Cyto_CD8_T_IL7R_CCL20 | Platinum drug resistance                                      | 0.037557144 | BCL2/CDKN1A/CREB1/HSP90AB1/NFKB1/NFKBIA                                | 6  |
| RPL17     | 0.567995465 | 2.58E-109 | Cyto_CD8_T_IL7R_CCL20 | Chronic myeloid leukemia                                      | 0.043504897 | BIRC2/BIRC3/FAS/BCL2/CDKN1A                                            | 5  |
| TRAF1     | 0.674598673 | 9.74E-109 | Cyto_CD8_T_IL7R_CCL20 | Apoptosis - multiple species                                  | 0.046646191 | CDKN1A/SMAD3/MYC/NFKB1/NFKBIA                                          | 3  |
| SYNGAP1   | 0.376561468 | 1.02E-108 | Cyto_CD8_T_IL7R_CCL20 | Lipid and atherosclerosis                                     | 0.047053498 | BIRC2/BIRC3/BCL2                                                       | 10 |
| RPLP1     | 0.475674825 | 3.62E-108 | Cyto_CD8_T_IL7R_CCL20 | Antigen processing and presentation                           | 0.047767312 | FAS/BCL2/HSP90AB1/JUN/NFE2L2/NFKB1/NFKBIA/POU2F2/CCL3L1/TNF            | 5  |
| RPL10A    | 0.592708168 | 1.55E-104 | Cyto_CD8_T_IL7R_CCL20 |                                                               |             | CD8A/CREB1/HLA-A/HSP90AB1/TNF                                          |    |
| RPL27A    | 0.740746954 | 2.41E-103 | Cyto_CD8_T_IL7R_CCL20 |                                                               |             |                                                                        |    |
| RPS12     | 0.467522408 | 9.68E-103 | Cyto_CD8_T_IL7R_CCL20 |                                                               |             |                                                                        |    |
| BIRC3     | 1.018137383 | 1.17E-102 | Cyto_CD8_T_IL7R_CCL20 |                                                               |             |                                                                        |    |
| TNFRSF18  | 0.609864747 | 3.08E-102 | Cyto_CD8_T_IL7R_CCL20 |                                                               |             |                                                                        |    |
| RPS16     | 0.553098807 | 1.77E-101 | Cyto_CD8_T_IL7R_CCL20 |                                                               |             |                                                                        |    |
| RPS8      | 0.484790231 | 3.50E-99  | Cyto_CD8_T_IL7R_CCL20 |                                                               |             |                                                                        |    |
| NR4A1     | 0.852703767 | 5.00E-97  | Cyto_CD8_T_IL7R_CCL20 |                                                               |             |                                                                        |    |
| RPL10     | 0.399238059 | 2.90E-96  | Cyto_CD8_T_IL7R_CCL20 |                                                               |             |                                                                        |    |
| RPL9      | 0.527552045 | 3.76E-94  | Cyto_CD8_T_IL7R_CCL20 |                                                               |             |                                                                        |    |
| PIM3      | 0.770677103 | 5.11E-94  | Cyto_CD8_T_IL7R_CCL20 |                                                               |             |                                                                        |    |
| RPL26     | 0.488690963 | 1.09E-93  | Cyto_CD8_T_IL7R_CCL20 |                                                               |             |                                                                        |    |
| JAML      | 0.449751781 | 1.48E-91  | Cyto_CD8_T_IL7R_CCL20 |                                                               |             |                                                                        |    |
| LINC01871 | 0.717465439 | 2.79E-91  | Cyto_CD8_T_IL7R_CCL20 |                                                               |             |                                                                        |    |
| RPL18A    | 0.471214662 | 2.87E-90  | Cyto_CD8_T_IL7R_CCL20 |                                                               |             |                                                                        |    |
| KLRG1     | 0.61890946  | 7.53E-90  | Cyto_CD8_T_IL7R_CCL20 |                                                               |             |                                                                        |    |
| RPL21     | 0.522349826 | 1.34E-89  | Cyto_CD8_T_IL7R_CCL20 |                                                               |             |                                                                        |    |
| RPL28     | 0.393465907 | 3.31E-89  | Cyto_CD8_T_IL7R_CCL20 |                                                               |             |                                                                        |    |
| GPR171    | 0.5532373   | 3.15E-88  | Cyto_CD8_T_IL7R_CCL20 |                                                               |             |                                                                        |    |
| CD52      | 0.6178516   | 3.34E-86  | Cyto_CD8_T_IL7R_CCL20 |                                                               |             |                                                                        |    |
| DSE       | 0.292765453 | 1.33E-85  | Cyto_CD8_T_IL7R_CCL20 |                                                               |             |                                                                        |    |
| KDM6B     | 0.657919655 | 7.76E-85  | Cyto_CD8_T_IL7R_CCL20 |                                                               |             |                                                                        |    |

|          |             |          |                       |
|----------|-------------|----------|-----------------------|
| SNHG16   | 0.676458309 | 8.28E-85 | Cyto_CD8.T_IL7R_CCL20 |
| RPS4X    | 0.425666638 | 8.72E-85 | Cyto_CD8.T_IL7R_CCL20 |
| GNA15    | 0.335894718 | 1.46E-82 | Cyto_CD8.T_IL7R_CCL20 |
| MYC      | 0.59307943  | 1.06E-80 | Cyto_CD8.T_IL7R_CCL20 |
| RPS14    | 0.426228073 | 1.39E-79 | Cyto_CD8.T_IL7R_CCL20 |
| RPS20    | 0.648901914 | 1.15E-78 | Cyto_CD8.T_IL7R_CCL20 |
| EEF1B2   | 0.514774451 | 1.24E-78 | Cyto_CD8.T_IL7R_CCL20 |
| RPS5     | 0.478586477 | 4.42E-78 | Cyto_CD8.T_IL7R_CCL20 |
| RPL15    | 0.440585214 | 9.86E-78 | Cyto_CD8.T_IL7R_CCL20 |
| CD3D     | 0.661790759 | 2.32E-77 | Cyto_CD8.T_IL7R_CCL20 |
| TIFA     | 0.517546694 | 6.10E-77 | Cyto_CD8.T_IL7R_CCL20 |
| CD8A     | 0.605931951 | 7.81E-77 | Cyto_CD8.T_IL7R_CCL20 |
| PBX4     | 0.36726032  | 1.65E-76 | Cyto_CD8.T_IL7R_CCL20 |
| PTMS     | 0.59486314  | 6.16E-76 | Cyto_CD8.T_IL7R_CCL20 |
| RPS13    | 0.400324287 | 2.25E-75 | Cyto_CD8.T_IL7R_CCL20 |
| CD160    | 0.683253831 | 1.32E-74 | Cyto_CD8.T_IL7R_CCL20 |
| CAMK4    | 0.364103902 | 6.05E-72 | Cyto_CD8.T_IL7R_CCL20 |
| RPS29    | 0.449412664 | 6.78E-71 | Cyto_CD8.T_IL7R_CCL20 |
| RPS19    | 0.463415129 | 2.23E-70 | Cyto_CD8.T_IL7R_CCL20 |
| SPTY2D1  | 0.586915513 | 5.67E-70 | Cyto_CD8.T_IL7R_CCL20 |
| HPGD     | 0.32539108  | 1.04E-69 | Cyto_CD8.T_IL7R_CCL20 |
| RPS27A   | 0.330141292 | 4.96E-69 | Cyto_CD8.T_IL7R_CCL20 |
| BTG1     | 0.555989483 | 1.16E-68 | Cyto_CD8.T_IL7R_CCL20 |
| RPL19    | 0.342051318 | 2.70E-68 | Cyto_CD8.T_IL7R_CCL20 |
| SPOCK2   | 0.561525706 | 8.15E-68 | Cyto_CD8.T_IL7R_CCL20 |
| RPL12    | 0.398488004 | 2.05E-67 | Cyto_CD8.T_IL7R_CCL20 |
| RPS3A    | 0.376382376 | 1.29E-65 | Cyto_CD8.T_IL7R_CCL20 |
| IER3     | 0.725689104 | 2.47E-65 | Cyto_CD8.T_IL7R_CCL20 |
| REL      | 0.603202838 | 8.48E-65 | Cyto_CD8.T_IL7R_CCL20 |
| DUSP5    | 0.654486092 | 5.13E-64 | Cyto_CD8.T_IL7R_CCL20 |
| JUN      | 0.809688761 | 1.34E-63 | Cyto_CD8.T_IL7R_CCL20 |
| PHLDA1   | 0.543612723 | 3.77E-63 | Cyto_CD8.T_IL7R_CCL20 |
| CD83     | 0.758741506 | 6.78E-63 | Cyto_CD8.T_IL7R_CCL20 |
| RPL34    | 0.372461385 | 1.99E-62 | Cyto_CD8.T_IL7R_CCL20 |
| SATB1    | 0.559234541 | 3.65E-62 | Cyto_CD8.T_IL7R_CCL20 |
| NINJ1    | 0.542030412 | 2.46E-61 | Cyto_CD8.T_IL7R_CCL20 |
| RPS25    | 0.372637395 | 6.40E-61 | Cyto_CD8.T_IL7R_CCL20 |
| RPL23    | 0.530893509 | 4.21E-60 | Cyto_CD8.T_IL7R_CCL20 |
| NFKBID   | 0.555663998 | 8.66E-59 | Cyto_CD8.T_IL7R_CCL20 |
| RPL29    | 0.358999096 | 1.07E-58 | Cyto_CD8.T_IL7R_CCL20 |
| RPL23A   | 0.412508608 | 2.53E-58 | Cyto_CD8.T_IL7R_CCL20 |
| GPR35    | 0.459784857 | 3.42E-58 | Cyto_CD8.T_IL7R_CCL20 |
| RPL18    | 0.315296792 | 2.02E-56 | Cyto_CD8.T_IL7R_CCL20 |
| PPP1R15B | 0.474881681 | 4.79E-56 | Cyto_CD8.T_IL7R_CCL20 |
| DDX21    | 0.549017217 | 3.12E-54 | Cyto_CD8.T_IL7R_CCL20 |
| RCAN3    | 0.379644581 | 3.38E-54 | Cyto_CD8.T_IL7R_CCL20 |
| FAS      | 0.503808397 | 4.07E-54 | Cyto_CD8.T_IL7R_CCL20 |
| ZNF267   | 0.52467165  | 5.00E-54 | Cyto_CD8.T_IL7R_CCL20 |
| POU2F2   | 0.402603887 | 1.48E-53 | Cyto_CD8.T_IL7R_CCL20 |
| RPL37A   | 0.432509808 | 1.85E-53 | Cyto_CD8.T_IL7R_CCL20 |
| ZDBF2    | 0.324184452 | 1.87E-52 | Cyto_CD8.T_IL7R_CCL20 |
| RPL37    | 0.342397487 | 7.05E-52 | Cyto_CD8.T_IL7R_CCL20 |
| RPL41    | 0.295443585 | 9.00E-52 | Cyto_CD8.T_IL7R_CCL20 |
| CCL3L1   | 1.170499051 | 9.65E-52 | Cyto_CD8.T_IL7R_CCL20 |
| STAT1    | 0.613247046 | 1.43E-51 | Cyto_CD8.T_IL7R_CCL20 |
| G3BP2    | 0.538001337 | 4.86E-51 | Cyto_CD8.T_IL7R_CCL20 |
| RPL13A   | 0.453023807 | 7.78E-51 | Cyto_CD8.T_IL7R_CCL20 |
| S100A4   | 0.433485195 | 1.54E-50 | Cyto_CD8.T_IL7R_CCL20 |
| RPSA     | 0.40191346  | 5.41E-50 | Cyto_CD8.T_IL7R_CCL20 |
| RPS24    | 0.304842048 | 1.47E-49 | Cyto_CD8.T_IL7R_CCL20 |
| CCSAP    | 0.343508179 | 1.59E-49 | Cyto_CD8.T_IL7R_CCL20 |
| SNHG8    | 0.457287039 | 2.90E-49 | Cyto_CD8.T_IL7R_CCL20 |
| GTF3C1   | 0.426776289 | 7.40E-49 | Cyto_CD8.T_IL7R_CCL20 |
| SPRY1    | 0.370715611 | 8.76E-49 | Cyto_CD8.T_IL7R_CCL20 |

|          |             |          |                       |
|----------|-------------|----------|-----------------------|
| JUND     | 0.406973186 | 1.13E-48 | Cyto_CD8.T_IL7R_CCL20 |
| PLK3     | 0.347084264 | 1.30E-48 | Cyto_CD8.T_IL7R_CCL20 |
| SYNJ2    | 0.260650078 | 9.28E-48 | Cyto_CD8.T_IL7R_CCL20 |
| RPL36A   | 0.414829685 | 5.96E-47 | Cyto_CD8.T_IL7R_CCL20 |
| GALC     | 0.276899772 | 7.13E-47 | Cyto_CD8.T_IL7R_CCL20 |
| ICE2     | 0.404344783 | 1.03E-46 | Cyto_CD8.T_IL7R_CCL20 |
| EEF1G    | 0.424168743 | 8.11E-46 | Cyto_CD8.T_IL7R_CCL20 |
| RPL35A   | 0.338825704 | 8.98E-46 | Cyto_CD8.T_IL7R_CCL20 |
| LTA      | 0.340374271 | 3.80E-45 | Cyto_CD8.T_IL7R_CCL20 |
| EML4     | 0.464295671 | 6.05E-45 | Cyto_CD8.T_IL7R_CCL20 |
| RPS3     | 0.276901091 | 6.69E-45 | Cyto_CD8.T_IL7R_CCL20 |
| FNBP1    | 0.466984934 | 4.63E-44 | Cyto_CD8.T_IL7R_CCL20 |
| BHLHE40  | 0.460634491 | 8.36E-44 | Cyto_CD8.T_IL7R_CCL20 |
| RPS11    | 0.401881756 | 2.24E-43 | Cyto_CD8.T_IL7R_CCL20 |
| CDKN1A   | 0.384924564 | 3.12E-43 | Cyto_CD8.T_IL7R_CCL20 |
| RPS21    | 0.3171374   | 3.52E-43 | Cyto_CD8.T_IL7R_CCL20 |
| IL32     | 0.476463535 | 4.66E-43 | Cyto_CD8.T_IL7R_CCL20 |
| CCNG2    | 0.361257255 | 1.28E-42 | Cyto_CD8.T_IL7R_CCL20 |
| STAT4    | 0.4637717   | 2.42E-42 | Cyto_CD8.T_IL7R_CCL20 |
| SDC4     | 0.255822861 | 2.97E-42 | Cyto_CD8.T_IL7R_CCL20 |
| RPL30    | 0.262490732 | 7.53E-42 | Cyto_CD8.T_IL7R_CCL20 |
| DYNLT3   | 0.333389889 | 1.06E-41 | Cyto_CD8.T_IL7R_CCL20 |
| A2M-AS1  | 0.253484708 | 2.59E-41 | Cyto_CD8.T_IL7R_CCL20 |
| HNRNPC   | 0.44591603  | 5.97E-41 | Cyto_CD8.T_IL7R_CCL20 |
| APOL3    | 0.362865969 | 2.04E-40 | Cyto_CD8.T_IL7R_CCL20 |
| IKZF2    | 0.300672093 | 2.52E-40 | Cyto_CD8.T_IL7R_CCL20 |
| RPL24    | 0.300456671 | 7.76E-40 | Cyto_CD8.T_IL7R_CCL20 |
| TTC39C   | 0.32792004  | 3.27E-39 | Cyto_CD8.T_IL7R_CCL20 |
| ODF2L    | 0.404965691 | 4.90E-39 | Cyto_CD8.T_IL7R_CCL20 |
| PABPC1   | 0.467674882 | 9.37E-39 | Cyto_CD8.T_IL7R_CCL20 |
| UBA52    | 0.313942143 | 9.94E-39 | Cyto_CD8.T_IL7R_CCL20 |
| PPP1R15A | 0.549498955 | 1.03E-38 | Cyto_CD8.T_IL7R_CCL20 |
| MT-ND2   | 0.415926631 | 1.50E-38 | Cyto_CD8.T_IL7R_CCL20 |
| TRAT1    | 0.286282496 | 1.68E-38 | Cyto_CD8.T_IL7R_CCL20 |
| ZC3H12A  | 0.404733287 | 5.99E-38 | Cyto_CD8.T_IL7R_CCL20 |
| CD70     | 0.391429927 | 1.65E-37 | Cyto_CD8.T_IL7R_CCL20 |
| HNRNPLL  | 0.274712379 | 2.15E-37 | Cyto_CD8.T_IL7R_CCL20 |
| NPM1     | 0.386098652 | 2.58E-37 | Cyto_CD8.T_IL7R_CCL20 |
| ABRA1    | 0.420298893 | 7.90E-37 | Cyto_CD8.T_IL7R_CCL20 |
| TRBC2    | 0.423883892 | 1.23E-36 | Cyto_CD8.T_IL7R_CCL20 |
| CD2      | 0.399546863 | 1.60E-36 | Cyto_CD8.T_IL7R_CCL20 |
| BCL2     | 0.348259341 | 2.17E-36 | Cyto_CD8.T_IL7R_CCL20 |
| TNFRSF4  | 0.297446813 | 2.29E-36 | Cyto_CD8.T_IL7R_CCL20 |
| MT-ND5   | 0.429667009 | 3.07E-36 | Cyto_CD8.T_IL7R_CCL20 |
| CAMK2N1  | 0.257710842 | 3.14E-36 | Cyto_CD8.T_IL7R_CCL20 |
| CXCR4    | 0.468163776 | 4.86E-36 | Cyto_CD8.T_IL7R_CCL20 |
| HLA-A    | 0.290777424 | 4.45E-35 | Cyto_CD8.T_IL7R_CCL20 |
| ZBTB16   | 0.347460644 | 1.10E-34 | Cyto_CD8.T_IL7R_CCL20 |
| CCDC107  | 0.385413713 | 1.54E-34 | Cyto_CD8.T_IL7R_CCL20 |
| RPS27    | 0.268670397 | 2.58E-34 | Cyto_CD8.T_IL7R_CCL20 |
| RANBP1   | 0.369154716 | 2.60E-34 | Cyto_CD8.T_IL7R_CCL20 |
| TRAF4    | 0.336880627 | 3.32E-34 | Cyto_CD8.T_IL7R_CCL20 |
| PDE4B    | 0.382961909 | 4.56E-34 | Cyto_CD8.T_IL7R_CCL20 |
| SOCS3    | 0.283057568 | 5.98E-34 | Cyto_CD8.T_IL7R_CCL20 |
| IGFLR1   | 0.347034323 | 4.91E-33 | Cyto_CD8.T_IL7R_CCL20 |
| IER5     | 0.350181493 | 5.36E-33 | Cyto_CD8.T_IL7R_CCL20 |
| INTS6    | 0.426786881 | 5.57E-33 | Cyto_CD8.T_IL7R_CCL20 |
| NAP1L1   | 0.415567174 | 9.22E-33 | Cyto_CD8.T_IL7R_CCL20 |
| RPS17    | 0.406393064 | 1.49E-32 | Cyto_CD8.T_IL7R_CCL20 |
| NDUFV2   | 0.358501813 | 1.92E-32 | Cyto_CD8.T_IL7R_CCL20 |
| FKBP11   | 0.381445765 | 2.31E-32 | Cyto_CD8.T_IL7R_CCL20 |
| VIM      | 0.486533822 | 2.36E-32 | Cyto_CD8.T_IL7R_CCL20 |
| MT-ND3   | 0.337327714 | 3.11E-32 | Cyto_CD8.T_IL7R_CCL20 |
| RPL8     | 0.259126874 | 4.39E-32 | Cyto_CD8.T_IL7R_CCL20 |



|          |             |          |                       |
|----------|-------------|----------|-----------------------|
| CD96     | 0.365733288 | 4.52E-32 | Cyto_CD8.T_IL7R_CCL20 |
| RPL5     | 0.277158425 | 5.45E-32 | Cyto_CD8.T_IL7R_CCL20 |
| RPL7     | 0.349904074 | 1.17E-31 | Cyto_CD8.T_IL7R_CCL20 |
| TRGC2    | 0.319858977 | 1.80E-31 | Cyto_CD8.T_IL7R_CCL20 |
| EIF3E    | 0.367230556 | 2.54E-31 | Cyto_CD8.T_IL7R_CCL20 |
| MDFC     | 0.341997374 | 7.98E-31 | Cyto_CD8.T_IL7R_CCL20 |
| HIVEP2   | 0.293400917 | 1.03E-30 | Cyto_CD8.T_IL7R_CCL20 |
| PIM1     | 0.332883908 | 1.39E-30 | Cyto_CD8.T_IL7R_CCL20 |
| RNF19A   | 0.520411141 | 2.16E-30 | Cyto_CD8.T_IL7R_CCL20 |
| MT-ND1   | 0.308987585 | 3.12E-30 | Cyto_CD8.T_IL7R_CCL20 |
| CUTA     | 0.367723178 | 6.22E-30 | Cyto_CD8.T_IL7R_CCL20 |
| PPA1     | 0.330325576 | 7.69E-30 | Cyto_CD8.T_IL7R_CCL20 |
| BTG2     | 0.511042555 | 9.43E-30 | Cyto_CD8.T_IL7R_CCL20 |
| RPL4     | 0.344832038 | 1.14E-29 | Cyto_CD8.T_IL7R_CCL20 |
| RGS2     | 0.413270889 | 1.44E-29 | Cyto_CD8.T_IL7R_CCL20 |
| EZR      | 0.450273422 | 1.53E-29 | Cyto_CD8.T_IL7R_CCL20 |
| CXCR6    | 0.322405976 | 1.57E-29 | Cyto_CD8.T_IL7R_CCL20 |
| MIR155HG | 0.602797319 | 5.14E-29 | Cyto_CD8.T_IL7R_CCL20 |
| RPL27    | 0.324326491 | 6.62E-29 | Cyto_CD8.T_IL7R_CCL20 |
| SYTL2    | 0.322911715 | 7.77E-29 | Cyto_CD8.T_IL7R_CCL20 |
| RACK1    | 0.273315806 | 7.89E-29 | Cyto_CD8.T_IL7R_CCL20 |
| RASSF2   | 0.278127844 | 1.33E-28 | Cyto_CD8.T_IL7R_CCL20 |
| RPS6KA3  | 0.313869619 | 1.78E-28 | Cyto_CD8.T_IL7R_CCL20 |
| RAB21    | 0.343266989 | 2.73E-28 | Cyto_CD8.T_IL7R_CCL20 |
| HSP90AB1 | 0.329827747 | 4.34E-28 | Cyto_CD8.T_IL7R_CCL20 |
| CD6      | 0.288430752 | 5.08E-28 | Cyto_CD8.T_IL7R_CCL20 |
| SEC14L1  | 0.321296355 | 5.37E-28 | Cyto_CD8.T_IL7R_CCL20 |
| RGS10    | 0.285386786 | 5.96E-28 | Cyto_CD8.T_IL7R_CCL20 |
| RPL36    | 0.267922867 | 6.54E-28 | Cyto_CD8.T_IL7R_CCL20 |
| CYB5A    | 0.317531779 | 9.55E-28 | Cyto_CD8.T_IL7R_CCL20 |
| KMT2E    | 0.389177233 | 1.05E-27 | Cyto_CD8.T_IL7R_CCL20 |
| SRSF7    | 0.436754652 | 1.55E-27 | Cyto_CD8.T_IL7R_CCL20 |
| GPX4     | 0.38341927  | 5.09E-27 | Cyto_CD8.T_IL7R_CCL20 |
| NFAT5    | 0.324260402 | 7.17E-27 | Cyto_CD8.T_IL7R_CCL20 |
| CCNI     | 0.332002969 | 1.23E-25 | Cyto_CD8.T_IL7R_CCL20 |
| CD3G     | 0.268435376 | 2.75E-25 | Cyto_CD8.T_IL7R_CCL20 |
| ZFAS1    | 0.344409392 | 4.16E-25 | Cyto_CD8.T_IL7R_CCL20 |
| RPL35    | 0.283050592 | 5.32E-25 | Cyto_CD8.T_IL7R_CCL20 |
| NSUN6    | 0.294613976 | 1.22E-24 | Cyto_CD8.T_IL7R_CCL20 |
| RPL31    | 0.315978729 | 1.24E-24 | Cyto_CD8.T_IL7R_CCL20 |
| CHD4     | 0.345318005 | 1.47E-24 | Cyto_CD8.T_IL7R_CCL20 |
| CKLF     | 0.339014598 | 2.86E-24 | Cyto_CD8.T_IL7R_CCL20 |
| GSPT1    | 0.316665666 | 1.78E-23 | Cyto_CD8.T_IL7R_CCL20 |
| GPBP1    | 0.325361962 | 2.24E-23 | Cyto_CD8.T_IL7R_CCL20 |
| FLT3LG   | 0.255470163 | 2.29E-23 | Cyto_CD8.T_IL7R_CCL20 |
| CEBPD    | 0.349731961 | 2.31E-23 | Cyto_CD8.T_IL7R_CCL20 |
| LCP1     | 0.348495981 | 2.39E-23 | Cyto_CD8.T_IL7R_CCL20 |
| SNHG6    | 0.31856062  | 2.73E-23 | Cyto_CD8.T_IL7R_CCL20 |
| DENND4A  | 0.300650609 | 3.05E-23 | Cyto_CD8.T_IL7R_CCL20 |
| PTMA     | 0.278313111 | 4.25E-23 | Cyto_CD8.T_IL7R_CCL20 |
| RAPGEF6  | 0.264029102 | 7.46E-23 | Cyto_CD8.T_IL7R_CCL20 |
| OTULIN   | 0.283968921 | 7.82E-23 | Cyto_CD8.T_IL7R_CCL20 |
| SMAP2    | 0.30266319  | 1.47E-22 | Cyto_CD8.T_IL7R_CCL20 |
| PAK2     | 0.350035771 | 1.91E-22 | Cyto_CD8.T_IL7R_CCL20 |
| SMAD3    | 0.277953259 | 2.16E-22 | Cyto_CD8.T_IL7R_CCL20 |
| TMEM123  | 0.257993128 | 2.25E-22 | Cyto_CD8.T_IL7R_CCL20 |
| PKM      | 0.311407418 | 3.46E-22 | Cyto_CD8.T_IL7R_CCL20 |
| GBP5     | 0.32918778  | 3.64E-22 | Cyto_CD8.T_IL7R_CCL20 |
| PRR5     | 0.257206397 | 3.79E-22 | Cyto_CD8.T_IL7R_CCL20 |
| UBALD2   | 0.339922116 | 3.84E-22 | Cyto_CD8.T_IL7R_CCL20 |
| DDX3Y    | 0.310997944 | 7.17E-22 | Cyto_CD8.T_IL7R_CCL20 |
| PDCD4    | 0.324494113 | 9.23E-22 | Cyto_CD8.T_IL7R_CCL20 |
| GPRIN3   | 0.35687966  | 1.50E-21 | Cyto_CD8.T_IL7R_CCL20 |
| LUZP1    | 0.273943953 | 1.52E-21 | Cyto_CD8.T_IL7R_CCL20 |

|            |             |             |                       |
|------------|-------------|-------------|-----------------------|
| IFNGR1     | 0.309885986 | 2.09E-21    | Cyto_CD8.T_IL7R_CCL20 |
| CREB1      | 0.293653523 | 3.23E-21    | Cyto_CD8.T_IL7R_CCL20 |
| PHF1       | 0.270187626 | 3.51E-21    | Cyto_CD8.T_IL7R_CCL20 |
| TWISTNB    | 0.435515253 | 4.14E-21    | Cyto_CD8.T_IL7R_CCL20 |
| BIRC2      | 0.295733421 | 5.35E-21    | Cyto_CD8.T_IL7R_CCL20 |
| MGAT4A     | 0.263212911 | 7.27E-21    | Cyto_CD8.T_IL7R_CCL20 |
| ELOVL5     | 0.304282265 | 7.84E-21    | Cyto_CD8.T_IL7R_CCL20 |
| GLIPR1     | 0.330174716 | 8.23E-21    | Cyto_CD8.T_IL7R_CCL20 |
| VMP1       | 0.267423631 | 2.50E-20    | Cyto_CD8.T_IL7R_CCL20 |
| CD48       | 0.319044333 | 2.68E-20    | Cyto_CD8.T_IL7R_CCL20 |
| RELB       | 0.265592666 | 6.34E-20    | Cyto_CD8.T_IL7R_CCL20 |
| DNAJA1     | 0.271019056 | 6.63E-20    | Cyto_CD8.T_IL7R_CCL20 |
| GBP2       | 0.310660056 | 7.26E-20    | Cyto_CD8.T_IL7R_CCL20 |
| EHD1       | 0.311969875 | 9.14E-20    | Cyto_CD8.T_IL7R_CCL20 |
| ANKRD12    | 0.364985217 | 1.01E-19    | Cyto_CD8.T_IL7R_CCL20 |
| OSTC       | 0.276767443 | 1.02E-19    | Cyto_CD8.T_IL7R_CCL20 |
| NFKB2      | 0.295278515 | 1.03E-19    | Cyto_CD8.T_IL7R_CCL20 |
| CDC37      | 0.307211262 | 1.27E-19    | Cyto_CD8.T_IL7R_CCL20 |
| MT-ATP6    | 0.257663265 | 1.45E-19    | Cyto_CD8.T_IL7R_CCL20 |
| CD44       | 0.314164615 | 1.97E-19    | Cyto_CD8.T_IL7R_CCL20 |
| PFDN5      | 0.252106499 | 2.05E-19    | Cyto_CD8.T_IL7R_CCL20 |
| GASS       | 0.262454438 | 2.19E-19    | Cyto_CD8.T_IL7R_CCL20 |
| PAG1       | 0.250366806 | 2.20E-19    | Cyto_CD8.T_IL7R_CCL20 |
| TIPARP     | 0.321226893 | 3.16E-19    | Cyto_CD8.T_IL7R_CCL20 |
| METTL21A   | 0.262045697 | 3.81E-19    | Cyto_CD8.T_IL7R_CCL20 |
| AC020916.1 | 0.384068322 | 3.86E-19    | Cyto_CD8.T_IL7R_CCL20 |
| NOP53      | 0.282380544 | 3.95E-19    | Cyto_CD8.T_IL7R_CCL20 |
| DDX3X      | 0.348192926 | 4.46E-19    | Cyto_CD8.T_IL7R_CCL20 |
| LAG3       | 0.251631684 | 4.79E-19    | Cyto_CD8.T_IL7R_CCL20 |
| ARL5B      | 0.305115477 | 6.49E-18    | Cyto_CD8.T_IL7R_CCL20 |
| SEC61B     | 0.287268997 | 7.42E-18    | Cyto_CD8.T_IL7R_CCL20 |
| BZW1       | 0.274603919 | 7.98E-18    | Cyto_CD8.T_IL7R_CCL20 |
| CD69       | 0.552964768 | 1.11E-17    | Cyto_CD8.T_IL7R_CCL20 |
| HOPX       | 0.27783396  | 1.38E-17    | Cyto_CD8.T_IL7R_CCL20 |
| RASGRP1    | 0.274868042 | 2.17E-17    | Cyto_CD8.T_IL7R_CCL20 |
| NFE2L2     | 0.301224255 | 2.27E-17    | Cyto_CD8.T_IL7R_CCL20 |
| S100A6     | 0.268649721 | 4.03E-17    | Cyto_CD8.T_IL7R_CCL20 |
| EMB        | 0.252921023 | 5.26E-17    | Cyto_CD8.T_IL7R_CCL20 |
| ANP32E     | 0.28466005  | 5.46E-17    | Cyto_CD8.T_IL7R_CCL20 |
| RGCC       | 0.464902266 | 1.05E-16    | Cyto_CD8.T_IL7R_CCL20 |
| GLS        | 0.262207078 | 1.12E-16    | Cyto_CD8.T_IL7R_CCL20 |
| ADGRE5     | 0.277577736 | 1.23E-16    | Cyto_CD8.T_IL7R_CCL20 |
| RPL22L1    | 0.294222786 | 3.14E-16    | Cyto_CD8.T_IL7R_CCL20 |
| SKIL       | 0.259267792 | 3.67E-16    | Cyto_CD8.T_IL7R_CCL20 |
| LPXN       | 0.250147887 | 3.97E-16    | Cyto_CD8.T_IL7R_CCL20 |
| MCL1       | 0.296263479 | 4.78E-16    | Cyto_CD8.T_IL7R_CCL20 |
| RPL38      | 0.253893809 | 4.79E-16    | Cyto_CD8.T_IL7R_CCL20 |
| SRSF2      | 0.297037479 | 7.74E-16    | Cyto_CD8.T_IL7R_CCL20 |
| CCNT1      | 0.268360377 | 1.20E-15    | Cyto_CD8.T_IL7R_CCL20 |
| EIF4A1     | 0.251397819 | 1.36E-15    | Cyto_CD8.T_IL7R_CCL20 |
| AC008105.3 | 0.253089337 | 2.46E-15    | Cyto_CD8.T_IL7R_CCL20 |
| SERBP1     | 0.269367494 | 1.00E-14    | Cyto_CD8.T_IL7R_CCL20 |
| GPSM3      | 0.263577116 | 1.20E-14    | Cyto_CD8.T_IL7R_CCL20 |
| FAM107B    | 0.271951301 | 2.34E-14    | Cyto_CD8.T_IL7R_CCL20 |
| LAPTM5     | 0.261979556 | 5.46E-14    | Cyto_CD8.T_IL7R_CCL20 |
| LINC-PINT  | 0.298579644 | 2.76E-13    | Cyto_CD8.T_IL7R_CCL20 |
| SYNE2      | 0.278614317 | 2.02E-12    | Cyto_CD8.T_IL7R_CCL20 |
| TERF2IP    | 0.254991693 | 3.01E-12    | Cyto_CD8.T_IL7R_CCL20 |
| JUNB       | 0.263801046 | 6.42E-11    | Cyto_CD8.T_IL7R_CCL20 |
| PRRC2C     | 0.251517544 | 1.69E-10    | Cyto_CD8.T_IL7R_CCL20 |
| CCL4L2     | 0.415568731 | 2.66E-07    | Cyto_CD8.T_IL7R_CCL20 |
| ISG15      | 0.289534891 | 1.47E-06    | Cyto_CD8.T_IL7R_CCL20 |
| MT2A       | 0.37919795  | 3.86E-05    | Cyto_CD8.T_IL7R_CCL20 |
| KLF6       | 0.298730013 | 0.000104145 | Cyto_CD8.T_IL7R_CCL20 |

**g. Cyto\_CD8.T\_GZMB\_GNLY\_PTGDS**

| Gene symbol | avg_log2FC  | p_val_adj | Upregulated group          | Description                                                   | pvalue      | geneID                                                                         | Count |
|-------------|-------------|-----------|----------------------------|---------------------------------------------------------------|-------------|--------------------------------------------------------------------------------|-------|
| PTGDS       | 4.953153969 | 0         | Cyto_CD8.T_GZMB_GNLY_PTGDS | Natural killer cell mediated cytotoxicity                     | 1.18E-11    | CD247/FCER1G/FCGR3A/GZMB/HLA-E/ICAM2/ITGB2/KIR2DL1/KLRD1/PRF1/RAC2/TYROBP/NCR3 | 13    |
| MYOM2       | 1.308717221 | 1.33E-164 | Cyto_CD8.T_GZMB_GNLY_PTGDS | Antigen processing and presentation                           | 1.13E-07    | B2M/PDIA3/HLA-E/HSPA1A/HSPA5/KIR2DL1/KLRD1/PSME1                               | 8     |
| FGFBP2      | 1.500623967 | 1.82E-155 | Cyto_CD8.T_GZMB_GNLY_PTGDS | Leukocyte transendothelial migration                          | 2.13E-06    | ACTB/ACTG1/RHOA/CYBA/ITGB2/CD99/RAC2/MYL12A                                    | 8     |
| SPON2       | 1.584737846 | 1.29E-152 | Cyto_CD8.T_GZMB_GNLY_PTGDS | Viral myocarditis                                             | 5.65E-06    | ACTB/ACTG1/HLA-E/ITGB2/PRF1/RAC2                                               | 6     |
| GZMB        | 1.358775167 | 9.63E-111 | Cyto_CD8.T_GZMB_GNLY_PTGDS | Graft-versus-host disease                                     | 1.51E-05    | GZMB/HLA-E/KIR2DL1/KLRD1/PRF1                                                  | 5     |
| FCGR3A      | 1.222344038 | 4.18E-104 | Cyto_CD8.T_GZMB_GNLY_PTGDS | Apoptosis                                                     | 7.27E-05    | ACTB/ACTG1/CTSC/CTSD/CTSW/GZMB/PRF1                                            | 7     |
| IGFBP7      | 0.755461217 | 8.34E-102 | Cyto_CD8.T_GZMB_GNLY_PTGDS | Fluid shear stress and atherosclerosis                        | 8.35E-05    | ACTB/ACTG1/RHOA/CYBA/NFE2L2/RAC2/KLF2                                          | 7     |
| LAIR2       | 0.838291434 | 3.28E-100 | Cyto_CD8.T_GZMB_GNLY_PTGDS | Chemokine signaling pathway                                   | 9.62E-05    | RHOA/CX3CR1/LYN/RAC2/CCL3/CCL4/XCL2/CCL4L2                                     | 8     |
| NKG7        | 0.982167523 | 9.37E-94  | Cyto_CD8.T_GZMB_GNLY_PTGDS | Viral protein interaction with cytokine and cytokine receptor | 0.000106135 | CX3CR1/IL2RG/CCL3/CCL4/XCL2/CCL4L2                                             | 6     |
| PRF1        | 1.129177003 | 9.99E-82  | Cyto_CD8.T_GZMB_GNLY_PTGDS | Human cytomegalovirus infection                               | 0.000287308 | RHOA/B2M/PDIA3/HLA-E/RAC2/CCL3/CCL4/CCL4L2                                     | 8     |
| FCER1G      | 1.131985904 | 4.18E-76  | Cyto_CD8.T_GZMB_GNLY_PTGDS | Platelet activation                                           | 0.000344913 | ACTB/ACTG1/RHOA/FCER1G/LYN/MYL12A                                              | 6     |
| CST7        | 0.778996641 | 8.28E-65  | Cyto_CD8.T_GZMB_GNLY_PTGDS | Lysosome                                                      | 0.000482326 | CTSC/CTSD/CTSW/PSAP/LITAF/NPTAB                                                | 6     |
| TYROBP      | 0.865887218 | 4.89E-60  | Cyto_CD8.T_GZMB_GNLY_PTGDS | Neutrophil extracellular trap formation                       | 0.000572574 | ACTB/ACTG1/CYBA/FCGR3A/ITGB2/RAC2/SELPLG                                       | 7     |
| CD247       | 0.89194687  | 6.31E-60  | Cyto_CD8.T_GZMB_GNLY_PTGDS | Phagosome                                                     | 0.001014503 | ACTB/ACTG1/CYBA/FCGR3A/HLA-E/ITGB2                                             | 6     |
| B2M         | 0.383150671 | 6.72E-59  | Cyto_CD8.T_GZMB_GNLY_PTGDS | Lipid and atherosclerosis                                     | 0.001187599 | RHOA/CYBA/HSPA1A/HSPA5/LYN/NFE2L2/CCL3                                         | 7     |
| AKR1C3      | 0.440681527 | 1.04E-51  | Cyto_CD8.T_GZMB_GNLY_PTGDS | Hippo signaling pathway                                       | 0.00119992  | ACTB/ACTG1/AREG/CNND3/ITGB2/TGFB1                                              | 6     |
| CTSW        | 0.840156677 | 1.59E-51  | Cyto_CD8.T_GZMB_GNLY_PTGDS | Regulation of actin cytoskeleton                              | 0.001287166 | ACTB/ACTG1/RHOA/ITGB2/PFN1/RAC2/MYL12A                                         | 7     |
| ARL4C       | 0.732839998 | 9.16E-47  | Cyto_CD8.T_GZMB_GNLY_PTGDS | Adherens junction                                             | 0.002049527 | ACTB/ACTG1/RHOA/RAC2                                                           | 4     |
| PLAC8       | 0.723529398 | 3.84E-45  | Cyto_CD8.T_GZMB_GNLY_PTGDS | Sphingolipid signaling pathway                                | 0.002073374 | RHOA/CTSD/FCER1G/RAC2/S1PR5                                                    | 5     |
| CX3CR1      | 0.45097515  | 5.87E-45  | Cyto_CD8.T_GZMB_GNLY_PTGDS | Tuberculosis                                                  | 0.002408833 | RHOA/CTSD/FCER1G/FCGR3A/ITGB2/TGFB1                                            | 6     |
| PRSS23      | 0.356529437 | 4.19E-43  | Cyto_CD8.T_GZMB_GNLY_PTGDS | Shigellosis                                                   | 0.002626382 | ACTB/ACTG1/RHOA/CAPNS1/PFN1/UBB/MYL12A                                         | 7     |
| LINC00299   | 0.418076673 | 1.84E-42  | Cyto_CD8.T_GZMB_GNLY_PTGDS | Leishmaniasis                                                 | 0.002758933 | CYBA/FCGR3A/ITGB2/TGFB1                                                        | 4     |
| EFHD2       | 0.733718375 | 3.67E-42  | Cyto_CD8.T_GZMB_GNLY_PTGDS | Allograft rejection                                           | 0.002963811 | GZMB/HLA-E/PRF1                                                                | 3     |
| RASSF4      | 0.381517041 | 3.61E-41  | Cyto_CD8.T_GZMB_GNLY_PTGDS | Colorectal cancer                                             | 0.004113901 | AREG/RHOA/RAC2/TGFB1                                                           | 4     |
| CHST2       | 0.371814874 | 4.33E-41  | Cyto_CD8.T_GZMB_GNLY_PTGDS | Focal adhesion                                                | 0.004162888 | ACTB/ACTG1/RHOA/CNND3/RAC2/MYL12A                                              | 6     |
| HLA-E       | 0.460635708 | 3.21E-38  | Cyto_CD8.T_GZMB_GNLY_PTGDS | Type I diabetes mellitus                                      | 0.004219942 | GZMB/HLA-E/PRF1                                                                | 3     |
| KIR2DL1     | 0.337664887 | 1.11E-36  | Cyto_CD8.T_GZMB_GNLY_PTGDS | Epstein-Barr virus infection                                  | 0.004265101 | B2M/CNND3/CD247/PDIA3/HLA-E/LYN                                                | 6     |
| MSS11       | 0.346816008 | 2.30E-33  | Cyto_CD8.T_GZMB_GNLY_PTGDS | Rap1 signaling pathway                                        | 0.00515119  | ACTB/ACTG1/RHOA/ITGB2/PFN1/RAC2                                                | 6     |
| KLRD1       | 0.625610037 | 2.68E-32  | Cyto_CD8.T_GZMB_GNLY_PTGDS | Cell adhesion molecules                                       | 0.005453076 | HLA-E/ICAM2/ITGB2/CD99/SELPLG                                                  | 5     |
| CTSD        | 0.651916025 | 8.42E-32  | Cyto_CD8.T_GZMB_GNLY_PTGDS | Human T-cell leukemia virus 1 infection                       | 0.006725338 | B2M/CNND3/HLA-E/IL2RG/ITGB2/TGFB1                                              | 6     |
| KLRF1       | 0.538003329 | 1.59E-31  | Cyto_CD8.T_GZMB_GNLY_PTGDS | Cytokine-cytokine receptor interaction                        | 0.006940292 | CX3CR1/IL2RG/CCL3/CCL4/XCL2/TGFB1/CCL4L2                                       | 7     |
| EMP3        | 0.587376    | 1.94E-31  | Cyto_CD8.T_GZMB_GNLY_PTGDS | Autoimmune thyroid disease                                    | 0.007589109 | GZMB/HLA-E/PRF1                                                                | 3     |
| ADGRG1      | 0.397830084 | 9.23E-29  | Cyto_CD8.T_GZMB_GNLY_PTGDS | NOD-like receptor signaling pathway                           | 0.012953272 | RHOA/CYBA/TXNIP/GABARAP/CARD16                                                 | 5     |
| GNLY        | 0.73335709  | 1.09E-28  | Cyto_CD8.T_GZMB_GNLY_PTGDS | Fc epsilon RI signaling pathway                               | 0.014976393 | FCER1G/LYN/RAC2                                                                | 3     |
| UBE2F       | 0.49107339  | 8.12E-28  | Cyto_CD8.T_GZMB_GNLY_PTGDS | Osteoclast differentiation                                    | 0.016304566 | CYBA/FCGR3A/TGFB1/TYROBP                                                       | 4     |
| TMSB10      | 0.346376095 | 1.35E-27  | Cyto_CD8.T_GZMB_GNLY_PTGDS | Yersinia infection                                            | 0.020405894 | ACTB/ACTG1/RHOA/RAC2                                                           | 4     |
| GK5         | 0.394093767 | 2.38E-26  | Cyto_CD8.T_GZMB_GNLY_PTGDS | Bacterial invasion of epithelial cells                        | 0.020829876 | ACTB/ACTG1/RHOA                                                                | 3     |
| TLE5        | 0.516085583 | 6.94E-26  | Cyto_CD8.T_GZMB_GNLY_PTGDS | Human immunodeficiency virus 1 infection                      | 0.022539558 | B2M/CD247/PDIA3/HLA-E/RAC2                                                     | 5     |
| ITGB2       | 0.594812472 | 1.67E-25  | Cyto_CD8.T_GZMB_GNLY_PTGDS | Hypertrophic cardiomyopathy                                   | 0.031208272 | ACTB/ACTG1/TGFB1                                                               | 3     |
| LITAF       | 0.524200765 | 5.53E-24  | Cyto_CD8.T_GZMB_GNLY_PTGDS | Rheumatoid arthritis                                          | 0.033925277 | ITGB2/CCL3/TGFB1                                                               | 3     |
| PTPN12      | 0.433064635 | 8.72E-24  | Cyto_CD8.T_GZMB_GNLY_PTGDS | Staphylococcus aureus infection                               | 0.036761865 | FCGR3A/ITGB2/SELPLG                                                            | 3     |
| FTL         | 0.43042795  | 1.07E-23  | Cyto_CD8.T_GZMB_GNLY_PTGDS | Dilated cardiomyopathy                                        | 0.036761865 | ACTB/ACTG1/TGFB1                                                               | 3     |
| LAIR1       | 0.323362407 | 6.87E-23  | Cyto_CD8.T_GZMB_GNLY_PTGDS | Fc gamma R-mediated phagocytosis                              | 0.037733826 | FCGR3A/LYN/RAC2                                                                | 3     |
| PFN1        | 0.418129796 | 8.04E-23  | Cyto_CD8.T_GZMB_GNLY_PTGDS | Ferroptosis                                                   | 0.038935761 | FTH1/FTL                                                                       | 2     |
| TCF25       | 0.535688519 | 8.97E-23  | Cyto_CD8.T_GZMB_GNLY_PTGDS | Hepatocellular carcinoma                                      | 0.039115696 | ACTB/ACTG1/NFE2L2/TGFB1                                                        | 4     |
| UBB         | 0.405019031 | 1.34E-22  | Cyto_CD8.T_GZMB_GNLY_PTGDS | Tight junction                                                | 0.039841179 | ACTB/ACTG1/RHOA/MYL12A                                                         | 4     |
| SELPLG      | 0.364113564 | 2.01E-22  | Cyto_CD8.T_GZMB_GNLY_PTGDS | Salmonella infection                                          | 0.041019703 | ACTB/ACTG1/RHOA/PFN1/MYL12A                                                    | 5     |
| CYBA        | 0.41848975  | 3.95E-22  | Cyto_CD8.T_GZMB_GNLY_PTGDS | Protein processing in endoplasmic reticulum                   | 0.041315304 | PDIA3/HSPA1A/HSPA5/NFE2L2                                                      | 4     |
| CD300A      | 0.466088826 | 4.32E-22  | Cyto_CD8.T_GZMB_GNLY_PTGDS | Chagas disease                                                | 0.042790223 | CD247/CCL3/TGFB1                                                               | 3     |
| PLEK        | 0.53539548  | 1.72E-21  | Cyto_CD8.T_GZMB_GNLY_PTGDS | NF-kappa B signaling pathway                                  | 0.04490376  | LYN/CCL4/CCL4L2                                                                | 3     |
| LYN         | 0.37652531  | 1.76E-21  | Cyto_CD8.T_GZMB_GNLY_PTGDS | Toll-like receptor signaling pathway                          | 0.04490376  | CCL3/CCL4/CCL4L2                                                               | 3     |
| SLC15A4     | 0.302006772 | 1.36E-20  | Cyto_CD8.T_GZMB_GNLY_PTGDS | Th17 cell differentiation                                     | 0.04928477  | CD247/IL2RG/TGFB1                                                              | 3     |
| HAVCR2      | 0.379390271 | 1.60E-20  | Cyto_CD8.T_GZMB_GNLY_PTGDS |                                                               |             |                                                                                |       |
| C1orf21     | 0.385128095 | 4.66E-20  | Cyto_CD8.T_GZMB_GNLY_PTGDS |                                                               |             |                                                                                |       |
| MT-CO2      | 0.331319679 | 8.06E-20  | Cyto_CD8.T_GZMB_GNLY_PTGDS |                                                               |             |                                                                                |       |
| ICAM2       | 0.408553466 | 8.81E-20  | Cyto_CD8.T_GZMB_GNLY_PTGDS |                                                               |             |                                                                                |       |

|            |             |             |                            |
|------------|-------------|-------------|----------------------------|
| AREG       | 0.77106926  | 1.20E-19    | Cyto_CD8.T_GZMB_GNLY_PTGDS |
| C1orf162   | 0.383791812 | 3.39E-19    | Cyto_CD8.T_GZMB_GNLY_PTGDS |
| TMIGD2     | 0.401319949 | 1.82E-18    | Cyto_CD8.T_GZMB_GNLY_PTGDS |
| S1PR5      | 0.433445626 | 5.29E-18    | Cyto_CD8.T_GZMB_GNLY_PTGDS |
| ACTB       | 0.503457943 | 2.08E-17    | Cyto_CD8.T_GZMB_GNLY_PTGDS |
| APOA2      | 0.49125535  | 2.15E-16    | Cyto_CD8.T_GZMB_GNLY_PTGDS |
| ABHD17A    | 0.44696447  | 9.20E-16    | Cyto_CD8.T_GZMB_GNLY_PTGDS |
| KLF2       | 0.626224287 | 2.62E-15    | Cyto_CD8.T_GZMB_GNLY_PTGDS |
| AC092821.3 | 0.36099766  | 1.56E-14    | Cyto_CD8.T_GZMB_GNLY_PTGDS |
| SERF2      | 0.293615856 | 2.64E-14    | Cyto_CD8.T_GZMB_GNLY_PTGDS |
| LGALS1     | 0.479407498 | 2.37E-13    | Cyto_CD8.T_GZMB_GNLY_PTGDS |
| HSH2D      | 0.303512053 | 2.58E-13    | Cyto_CD8.T_GZMB_GNLY_PTGDS |
| GNPTAB     | 0.324737713 | 3.07E-13    | Cyto_CD8.T_GZMB_GNLY_PTGDS |
| CARD16     | 0.49242867  | 1.97E-12    | Cyto_CD8.T_GZMB_GNLY_PTGDS |
| APMAP      | 0.385104526 | 1.17E-11    | Cyto_CD8.T_GZMB_GNLY_PTGDS |
| UCP2       | 0.428123616 | 2.78E-11    | Cyto_CD8.T_GZMB_GNLY_PTGDS |
| TIMP1      | 0.314014098 | 5.78E-11    | Cyto_CD8.T_GZMB_GNLY_PTGDS |
| FTH1       | 0.432893971 | 9.76E-11    | Cyto_CD8.T_GZMB_GNLY_PTGDS |
| CEP78      | 0.301638262 | 1.06E-09    | Cyto_CD8.T_GZMB_GNLY_PTGDS |
| BIN2       | 0.370321263 | 1.59E-09    | Cyto_CD8.T_GZMB_GNLY_PTGDS |
| GFOD1      | 0.262955139 | 1.59E-09    | Cyto_CD8.T_GZMB_GNLY_PTGDS |
| TXNIP      | 0.372380229 | 1.98E-09    | Cyto_CD8.T_GZMB_GNLY_PTGDS |
| CCL4       | 0.564201045 | 3.02E-09    | Cyto_CD8.T_GZMB_GNLY_PTGDS |
| HOPX       | 0.453559432 | 3.36E-09    | Cyto_CD8.T_GZMB_GNLY_PTGDS |
| CD99       | 0.340224818 | 3.85E-09    | Cyto_CD8.T_GZMB_GNLY_PTGDS |
| MYL12A     | 0.282004837 | 4.23E-09    | Cyto_CD8.T_GZMB_GNLY_PTGDS |
| CAPNS1     | 0.313566707 | 1.11E-08    | Cyto_CD8.T_GZMB_GNLY_PTGDS |
| CCND3      | 0.401933912 | 1.93E-08    | Cyto_CD8.T_GZMB_GNLY_PTGDS |
| CTSC       | 0.306981271 | 4.00E-08    | Cyto_CD8.T_GZMB_GNLY_PTGDS |
| CLIC1      | 0.275909705 | 4.05E-08    | Cyto_CD8.T_GZMB_GNLY_PTGDS |
| CCL4L2     | 0.477369796 | 5.26E-08    | Cyto_CD8.T_GZMB_GNLY_PTGDS |
| C1orf56    | 0.314057724 | 6.19E-08    | Cyto_CD8.T_GZMB_GNLY_PTGDS |
| GLIPR2     | 0.260093889 | 6.52E-08    | Cyto_CD8.T_GZMB_GNLY_PTGDS |
| AB13       | 0.294354622 | 7.01E-08    | Cyto_CD8.T_GZMB_GNLY_PTGDS |
| METRNL     | 0.342713684 | 1.37E-07    | Cyto_CD8.T_GZMB_GNLY_PTGDS |
| DBI        | 0.299021661 | 1.63E-07    | Cyto_CD8.T_GZMB_GNLY_PTGDS |
| SRGN       | 0.253770641 | 2.02E-07    | Cyto_CD8.T_GZMB_GNLY_PTGDS |
| NCR3       | 0.28113002  | 3.11E-07    | Cyto_CD8.T_GZMB_GNLY_PTGDS |
| TPST2      | 0.310758988 | 3.48E-07    | Cyto_CD8.T_GZMB_GNLY_PTGDS |
| PSAP       | 0.322111376 | 4.08E-07    | Cyto_CD8.T_GZMB_GNLY_PTGDS |
| TGFB1      | 0.328588088 | 4.80E-07    | Cyto_CD8.T_GZMB_GNLY_PTGDS |
| CD53       | 0.329728954 | 6.84E-07    | Cyto_CD8.T_GZMB_GNLY_PTGDS |
| FGL2       | 0.273660966 | 7.23E-07    | Cyto_CD8.T_GZMB_GNLY_PTGDS |
| DHRS7      | 0.304598708 | 1.19E-06    | Cyto_CD8.T_GZMB_GNLY_PTGDS |
| ACTG1      | 0.257681699 | 1.63E-06    | Cyto_CD8.T_GZMB_GNLY_PTGDS |
| GABARAP    | 0.287528907 | 3.93E-06    | Cyto_CD8.T_GZMB_GNLY_PTGDS |
| IL2RG      | 0.308915662 | 5.68E-06    | Cyto_CD8.T_GZMB_GNLY_PTGDS |
| CD7        | 0.257291484 | 2.79E-05    | Cyto_CD8.T_GZMB_GNLY_PTGDS |
| PSME1      | 0.291347811 | 3.45E-05    | Cyto_CD8.T_GZMB_GNLY_PTGDS |
| CDC42SE1   | 0.336417405 | 4.01E-05    | Cyto_CD8.T_GZMB_GNLY_PTGDS |
| XCL2       | 0.493006068 | 0.000112515 | Cyto_CD8.T_GZMB_GNLY_PTGDS |
| CLIC3      | 0.252121985 | 0.000116851 | Cyto_CD8.T_GZMB_GNLY_PTGDS |
| RHOC       | 0.280464212 | 0.000141463 | Cyto_CD8.T_GZMB_GNLY_PTGDS |
| RHOA       | 0.273895398 | 0.00014291  | Cyto_CD8.T_GZMB_GNLY_PTGDS |
| SDCBP      | 0.335687951 | 0.000301086 | Cyto_CD8.T_GZMB_GNLY_PTGDS |
| BSG        | 0.257979625 | 0.000302555 | Cyto_CD8.T_GZMB_GNLY_PTGDS |
| SYNE1      | 0.268574892 | 0.000310654 | Cyto_CD8.T_GZMB_GNLY_PTGDS |
| RAC2       | 0.263739125 | 0.000489539 | Cyto_CD8.T_GZMB_GNLY_PTGDS |
| PYHIN1     | 0.312945872 | 0.00088381  | Cyto_CD8.T_GZMB_GNLY_PTGDS |
| PDIA3      | 0.278915972 | 0.000964802 | Cyto_CD8.T_GZMB_GNLY_PTGDS |
| HSPA1A     | 0.279171363 | 0.001053304 | Cyto_CD8.T_GZMB_GNLY_PTGDS |
| NFE2L2     | 0.304983954 | 0.001656578 | Cyto_CD8.T_GZMB_GNLY_PTGDS |
| HSPA5      | 0.298477403 | 0.002439437 | Cyto_CD8.T_GZMB_GNLY_PTGDS |
| CCL3       | 0.322138391 | 0.002527555 | Cyto_CD8.T_GZMB_GNLY_PTGDS |

|         |             |             |                            |
|---------|-------------|-------------|----------------------------|
| DOK2    | 0.287508381 | 0.004379652 | Cyto_CD8.T_GZMB_GNLY_PTGDS |
| KLF3    | 0.290000354 | 0.005031642 | Cyto_CD8.T_GZMB_GNLY_PTGDS |
| C5orf56 | 0.271525867 | 0.005077114 | Cyto_CD8.T_GZMB_GNLY_PTGDS |

**i. Cyto\_CD8.T\_GZMB\_GNLY**

| Gene symbol | avg_log2FC  | p_val_adj | Upregulated group    | Description                                     | pvalue      | geneID                                                 | Count |
|-------------|-------------|-----------|----------------------|-------------------------------------------------|-------------|--------------------------------------------------------|-------|
| GNLY        | 3.565850516 | 0         | Cyto_CD8.T_GZMB_GNLY | Natural killer cell mediated cytotoxicity       | 2.26E-07    | CD247/FCER1G/FCGR3A/GZMB/HLA-E/ITGB2/KLRD1/PRF1/TYROBP | 9     |
| GZMB        | 1.966918782 | 0         | Cyto_CD8.T_GZMB_GNLY | Cell adhesion molecules                         | 7.22E-06    | HLA-DPB1/HLA-E/ITGB1/ITGB2/ITGB7/CD99/SELL/SELPLG      | 8     |
| FGFBP2      | 1.89869062  | 0         | Cyto_CD8.T_GZMB_GNLY | Graft-versus-host disease                       | 9.15E-06    | GZMB/HLA-DPB1/HLA-E/KLRD1/PRF1                         | 5     |
| SPON2       | 1.357860719 | 0         | Cyto_CD8.T_GZMB_GNLY | Leukocyte transendothelial migration            | 1.18E-05    | ACTB/CYBA/ITGB1/ITGB2/CD99/RAP1B/MYL12A                | 7     |
| FCGR3A      | 1.288420517 | 0         | Cyto_CD8.T_GZMB_GNLY | Leishmaniasis                                   | 1.34E-05    | CYBA/FCGR3A/HLA-DPB1/ITGB1/ITGB2/TGFB1                 | 6     |
| NKG7        | 1.216199025 | 0         | Cyto_CD8.T_GZMB_GNLY | Antigen processing and presentation             | 1.44E-05    | B2M/HLA-DPB1/HLA-E/HSPA1A/KLRD1/PSME1                  | 6     |
| PRF1        | 1.203108861 | 0         | Cyto_CD8.T_GZMB_GNLY | Viral myocarditis                               | 5.34E-05    | ACTB/HLA-DPB1/HLA-E/ITGB2/PRF1                         | 5     |
| GZMH        | 1.134849038 | 0         | Cyto_CD8.T_GZMB_GNLY | Phagosome                                       | 7.58E-05    | ACTB/CYBA/FCGR3A/HLA-DPB1/HLA-E/ITGB1/ITGB2            | 7     |
| MYOM2       | 1.083556665 | 0         | Cyto_CD8.T_GZMB_GNLY | Allograft rejection                             | 0.000126229 | GZMB/HLA-DPB1/HLA-E/PRF1                               | 4     |
| KLF2        | 0.995492805 | 0         | Cyto_CD8.T_GZMB_GNLY | Platelet activation                             | 0.000196285 | ACTB/FCER1G/ITGB1/RAP1B/RASGRP2/MYL12A                 | 6     |
| CTSW        | 0.891362246 | 0         | Cyto_CD8.T_GZMB_GNLY | Type I diabetes mellitus                        | 0.000205705 | GZMB/HLA-DPB1/HLA-E/PRF1                               | 4     |
| ARL4C       | 0.86674591  | 0         | Cyto_CD8.T_GZMB_GNLY | Tuberculosis                                    | 0.000218124 | CTSD/FCER1G/FCGR3A/HLA-DPB1/ITGB2/LSP1/TGFB1           | 7     |
| EFHD2       | 0.86057031  | 0         | Cyto_CD8.T_GZMB_GNLY | Apoptosis                                       | 0.000324176 | ACTB/CTSC/CTSD/CTSW/GZMB/PRF1                          | 6     |
| EMP3        | 0.767676559 | 0         | Cyto_CD8.T_GZMB_GNLY | Focal adhesion                                  | 0.000427648 | ACTB/CCND3/FLNA/ITGB1/ITGB7/RAP1B/MYL12A               | 7     |
| LAIR2       | 0.56373733  | 0         | Cyto_CD8.T_GZMB_GNLY | Autoimmune thyroid disease                      | 0.000463747 | GZMB/HLA-DPB1/HLA-E/PRF1                               | 4     |
| ADGRG1      | 0.509527501 | 0         | Cyto_CD8.T_GZMB_GNLY | Regulation of actin cytoskeleton                | 0.000695442 | ACTB/ITGB1/ITGB2/ITGB7/PFN1/ARPC2/MYL12A               | 7     |
| CX3CR1      | 0.493059103 | 0         | Cyto_CD8.T_GZMB_GNLY | Shigellosis                                     | 0.001445357 | ACTB/CAPNS1/ITGB1/PFN1/UBB/ARPC2/MYL12A                | 7     |
| B2M         | 0.327181147 | 0         | Cyto_CD8.T_GZMB_GNLY | Rap1 signaling pathway                          | 0.003092108 | ACTB/ITGB1/ITGB2/PFN1/RAP1B/RASGRP2                    | 6     |
| CS17        | 0.658293579 | 9.94E-295 | Cyto_CD8.T_GZMB_GNLY | Hypertrophic cardiomyopathy                     | 0.003350702 | ACTB/ITGB1/ITGB7/TGFB1                                 | 4     |
| PRSS23      | 0.378465725 | 5.90E-288 | Cyto_CD8.T_GZMB_GNLY | Human T-cell leukemia virus 1 infection         | 0.004066838 | B2M/CCND3/HLA-DPB1/HLA-E/ITGB2/TGFB1                   | 6     |
| IGFBP7      | 0.58103433  | 2.03E-264 | Cyto_CD8.T_GZMB_GNLY | Staphylococcus aureus infection                 | 0.004225284 | FCGR3A/HLA-DPB1/ITGB2/SELPLG                           | 4     |
| TMSB10      | 0.432194523 | 1.14E-257 | Cyto_CD8.T_GZMB_GNLY | Dilated cardiomyopathy                          | 0.004225284 | ACTB/ITGB1/ITGB7/TGFB1                                 | 4     |
| LGALS1      | 0.849597702 | 3.42E-253 | Cyto_CD8.T_GZMB_GNLY | Intestinal immune network for IgA production    | 0.004584712 | HLA-DPB1/ITGB7/TGFB1                                   | 3     |
| SH3BGR1     | 0.643107143 | 2.87E-250 | Cyto_CD8.T_GZMB_GNLY | Salmonella infection                            | 0.007075071 | ACTB/FLNA/PFN1/S100A10/ARPC2/MYL12A                    | 6     |
| PLAC8       | 0.719238489 | 7.87E-241 | Cyto_CD8.T_GZMB_GNLY | Toxoplasmosis                                   | 0.007283355 | HLA-DPB1/HSPA1A/ITGB1/TGFB1                            | 4     |
| C12orf75    | 0.622639465 | 1.25E-236 | Cyto_CD8.T_GZMB_GNLY | Neutrophil extracellular trap formation         | 0.009715264 | ACTB/CYBA/FCGR3A/ITGB2/SELPLG                          | 5     |
| PLEK        | 0.719961887 | 6.24E-235 | Cyto_CD8.T_GZMB_GNLY | Cell cycle                                      | 0.01093402  | CCND3/CDKN2D/TFDP2/TGFB1                               | 4     |
| CD300A      | 0.550718286 | 1.12E-218 | Cyto_CD8.T_GZMB_GNLY | Osteoclast differentiation                      | 0.011536456 | CYBA/FCGR3A/TGFB1/TYROBP                               | 4     |
| ENC1        | 0.491877786 | 1.88E-211 | Cyto_CD8.T_GZMB_GNLY | Epstein-Barr virus infection                    | 0.012439065 | B2M/CCND3/CD247/HLA-DPB1/HLA-E                         | 5     |
| TLE5        | 0.576402247 | 9.12E-205 | Cyto_CD8.T_GZMB_GNLY | Lysosome                                        | 0.012804777 | CTSC/CTSD/CTSW/LITAF                                   | 4     |
| AKR1C3      | 0.320210312 | 5.41E-204 | Cyto_CD8.T_GZMB_GNLY | Bacterial invasion of epithelial cells          | 0.015895249 | ACTB/ITGB1/ARPC2                                       | 3     |
| UBE2F       | 0.496529277 | 5.98E-203 | Cyto_CD8.T_GZMB_GNLY | Arrhythmogenic right ventricular cardiomyopathy | 0.015895249 | ACTB/ITGB1/ITGB7                                       | 3     |
| SELL        | 0.420501985 | 1.90E-202 | Cyto_CD8.T_GZMB_GNLY | Asthma                                          | 0.01914435  | FCER1G/HLA-DPB1                                        | 2     |
| LINC00299   | 0.410674396 | 2.47E-202 | Cyto_CD8.T_GZMB_GNLY | ECM-receptor interaction                        | 0.022614861 | CD47/ITGB1/ITGB7                                       | 3     |
| C1orf21     | 0.42731227  | 1.39E-193 | Cyto_CD8.T_GZMB_GNLY | Hippo signaling pathway                         | 0.02275608  | ACTB/CCND3/ITGB2/TGFB1                                 | 4     |
| LITAF       | 0.553020532 | 4.46E-193 | Cyto_CD8.T_GZMB_GNLY | Rheumatoid arthritis                            | 0.026107826 | HLA-DPB1/ITGB2/TGFB1                                   | 3     |
| PFN1        | 0.492339589 | 1.13E-190 | Cyto_CD8.T_GZMB_GNLY | Tight junction                                  | 0.028842473 | ACTB/ITGB1/ARPC2/MYL12A                                | 4     |
| ITGB1       | 0.628902188 | 3.31E-182 | Cyto_CD8.T_GZMB_GNLY | Th17 cell differentiation                       | 0.038225746 | CD247/HLA-DPB1/ITGB1                                   | 3     |
| MT-CO2      | 0.337718178 | 4.16E-175 | Cyto_CD8.T_GZMB_GNLY | Chemokine signaling pathway                     | 0.043001576 | CX3CR1/RAP1B/XCL2/RASGRP2                              | 4     |
| CLIC3       | 0.654736134 | 6.44E-174 | Cyto_CD8.T_GZMB_GNLY | Malaria                                         | 0.046418081 | ITGB2/TGFB1                                            | 2     |
| KLRD1       | 0.573447232 | 4.67E-172 | Cyto_CD8.T_GZMB_GNLY | Pathogenic Escherichia coli infection           | 0.046519448 | ACTB/ITGB1/MYO1F/ARPC2                                 | 4     |
| S100A4      | 0.646716848 | 1.27E-169 | Cyto_CD8.T_GZMB_GNLY | Sphingolipid signaling pathway                  | 0.048646571 | CTSD/FCER1G/S1PR5                                      | 3     |
| CEP78       | 0.381396815 | 3.73E-165 | Cyto_CD8.T_GZMB_GNLY |                                                 |             |                                                        |       |
| SBP3        | 0.292989387 | 5.44E-164 | Cyto_CD8.T_GZMB_GNLY |                                                 |             |                                                        |       |
| ITGB2       | 0.54011773  | 7.75E-163 | Cyto_CD8.T_GZMB_GNLY |                                                 |             |                                                        |       |
| HOPX        | 0.61559853  | 3.71E-158 | Cyto_CD8.T_GZMB_GNLY |                                                 |             |                                                        |       |
| MTSS1       | 0.273497358 | 7.34E-157 | Cyto_CD8.T_GZMB_GNLY |                                                 |             |                                                        |       |
| CYBA        | 0.415630044 | 2.37E-156 | Cyto_CD8.T_GZMB_GNLY |                                                 |             |                                                        |       |
| HLA-E       | 0.353251278 | 4.22E-155 | Cyto_CD8.T_GZMB_GNLY |                                                 |             |                                                        |       |
| CD247       | 0.583180924 | 1.42E-152 | Cyto_CD8.T_GZMB_GNLY |                                                 |             |                                                        |       |
| FCER1G      | 0.680556542 | 6.35E-147 | Cyto_CD8.T_GZMB_GNLY |                                                 |             |                                                        |       |
| UCP2        | 0.547760091 | 6.42E-147 | Cyto_CD8.T_GZMB_GNLY |                                                 |             |                                                        |       |
| GK5         | 0.290083745 | 5.93E-137 | Cyto_CD8.T_GZMB_GNLY |                                                 |             |                                                        |       |
| TPST2       | 0.428375284 | 2.82E-136 | Cyto_CD8.T_GZMB_GNLY |                                                 |             |                                                        |       |
| ANXA1       | 0.493240733 | 6.94E-136 | Cyto_CD8.T_GZMB_GNLY |                                                 |             |                                                        |       |
| HAVCR2      | 0.357980216 | 8.47E-128 | Cyto_CD8.T_GZMB_GNLY |                                                 |             |                                                        |       |
| S1PR5       | 0.422589742 | 1.60E-125 | Cyto_CD8.T_GZMB_GNLY |                                                 |             |                                                        |       |

|            |             |           |                      |
|------------|-------------|-----------|----------------------|
| FLNA       | 0.469082328 | 1.72E-124 | Cyto_CD8.T_GZMB_GNLY |
| KLF3       | 0.435937728 | 2.70E-124 | Cyto_CD8.T_GZMB_GNLY |
| ABHD17A    | 0.443657775 | 1.26E-123 | Cyto_CD8.T_GZMB_GNLY |
| RASGRP2    | 0.261516329 | 4.81E-118 | Cyto_CD8.T_GZMB_GNLY |
| DSTN       | 0.364255096 | 7.66E-115 | Cyto_CD8.T_GZMB_GNLY |
| C1orf162   | 0.284901925 | 1.82E-112 | Cyto_CD8.T_GZMB_GNLY |
| TXNIP      | 0.499230767 | 3.08E-111 | Cyto_CD8.T_GZMB_GNLY |
| SELPLG     | 0.30955736  | 2.10E-109 | Cyto_CD8.T_GZMB_GNLY |
| IFITM2     | 0.370124626 | 9.77E-109 | Cyto_CD8.T_GZMB_GNLY |
| S100A10    | 0.472127769 | 2.39E-107 | Cyto_CD8.T_GZMB_GNLY |
| CD99       | 0.398353492 | 4.94E-103 | Cyto_CD8.T_GZMB_GNLY |
| IER2       | 0.377894297 | 1.69E-102 | Cyto_CD8.T_GZMB_GNLY |
| FCRL6      | 0.315574921 | 3.97E-102 | Cyto_CD8.T_GZMB_GNLY |
| PTPN12     | 0.328782931 | 2.03E-101 | Cyto_CD8.T_GZMB_GNLY |
| TCF25      | 0.45898905  | 1.46E-99  | Cyto_CD8.T_GZMB_GNLY |
| FXYD5      | 0.42071202  | 9.76E-92  | Cyto_CD8.T_GZMB_GNLY |
| UBB        | 0.317163822 | 6.52E-91  | Cyto_CD8.T_GZMB_GNLY |
| TYROBP     | 0.47140724  | 4.35E-89  | Cyto_CD8.T_GZMB_GNLY |
| RAB29      | 0.34614655  | 1.12E-88  | Cyto_CD8.T_GZMB_GNLY |
| SYNE1      | 0.316554905 | 6.45E-88  | Cyto_CD8.T_GZMB_GNLY |
| CDKN2D     | 0.357909497 | 1.85E-86  | Cyto_CD8.T_GZMB_GNLY |
| HLA-DPB1   | 0.307615533 | 3.12E-86  | Cyto_CD8.T_GZMB_GNLY |
| ZEB2       | 0.369026966 | 4.73E-86  | Cyto_CD8.T_GZMB_GNLY |
| FGL2       | 0.277751152 | 7.12E-86  | Cyto_CD8.T_GZMB_GNLY |
| MYL12A     | 0.300503295 | 7.63E-86  | Cyto_CD8.T_GZMB_GNLY |
| ACTB       | 0.451009185 | 1.09E-85  | Cyto_CD8.T_GZMB_GNLY |
| TGFB1      | 0.381504388 | 1.92E-85  | Cyto_CD8.T_GZMB_GNLY |
| RIPOR2     | 0.292325871 | 2.24E-85  | Cyto_CD8.T_GZMB_GNLY |
| KLRF1      | 0.331473507 | 6.96E-80  | Cyto_CD8.T_GZMB_GNLY |
| SAMD3      | 0.309240578 | 7.25E-80  | Cyto_CD8.T_GZMB_GNLY |
| TKTL1      | 0.588505273 | 2.72E-79  | Cyto_CD8.T_GZMB_GNLY |
| CLIC1      | 0.300761822 | 1.18E-76  | Cyto_CD8.T_GZMB_GNLY |
| SRPK2      | 0.285667401 | 3.77E-76  | Cyto_CD8.T_GZMB_GNLY |
| CTSD       | 0.330365992 | 3.01E-75  | Cyto_CD8.T_GZMB_GNLY |
| PSME1      | 0.327833116 | 7.31E-75  | Cyto_CD8.T_GZMB_GNLY |
| ARPC2      | 0.278700969 | 2.21E-74  | Cyto_CD8.T_GZMB_GNLY |
| APOA2      | 0.430563289 | 2.95E-73  | Cyto_CD8.T_GZMB_GNLY |
| MYO1F      | 0.280365092 | 3.28E-73  | Cyto_CD8.T_GZMB_GNLY |
| ATP5MC2    | 0.306089556 | 4.54E-72  | Cyto_CD8.T_GZMB_GNLY |
| SYNE2      | 0.340007572 | 8.46E-72  | Cyto_CD8.T_GZMB_GNLY |
| C5orf56    | 0.338316019 | 1.71E-70  | Cyto_CD8.T_GZMB_GNLY |
| TFDP2      | 0.251958366 | 6.54E-70  | Cyto_CD8.T_GZMB_GNLY |
| CCND3      | 0.323057044 | 1.41E-68  | Cyto_CD8.T_GZMB_GNLY |
| BIN2       | 0.32952075  | 1.62E-67  | Cyto_CD8.T_GZMB_GNLY |
| MT-CYB     | 0.267115851 | 9.93E-66  | Cyto_CD8.T_GZMB_GNLY |
| LSP1       | 0.322066786 | 1.59E-64  | Cyto_CD8.T_GZMB_GNLY |
| CTSC       | 0.332257866 | 6.45E-64  | Cyto_CD8.T_GZMB_GNLY |
| CAPNS1     | 0.309652175 | 7.29E-61  | Cyto_CD8.T_GZMB_GNLY |
| ITGB7      | 0.255425115 | 1.99E-59  | Cyto_CD8.T_GZMB_GNLY |
| AC092821.3 | 0.283195423 | 2.09E-58  | Cyto_CD8.T_GZMB_GNLY |
| ANXA6      | 0.286605809 | 1.88E-55  | Cyto_CD8.T_GZMB_GNLY |
| LY6E       | 0.335559632 | 4.14E-53  | Cyto_CD8.T_GZMB_GNLY |
| LYAR       | 0.28047439  | 1.09E-52  | Cyto_CD8.T_GZMB_GNLY |
| DOK2       | 0.303851008 | 3.14E-52  | Cyto_CD8.T_GZMB_GNLY |
| CD47       | 0.304654925 | 3.80E-52  | Cyto_CD8.T_GZMB_GNLY |
| FTH1       | 0.409914368 | 6.41E-52  | Cyto_CD8.T_GZMB_GNLY |
| RPS26      | 0.254905189 | 7.74E-50  | Cyto_CD8.T_GZMB_GNLY |
| S100A6     | 0.328913225 | 1.41E-48  | Cyto_CD8.T_GZMB_GNLY |
| CARD16     | 0.291486369 | 9.65E-47  | Cyto_CD8.T_GZMB_GNLY |
| IFITM1     | 0.271652916 | 1.81E-46  | Cyto_CD8.T_GZMB_GNLY |
| HSPA1A     | 0.333201113 | 1.26E-44  | Cyto_CD8.T_GZMB_GNLY |
| RAP1B      | 0.274220937 | 1.27E-44  | Cyto_CD8.T_GZMB_GNLY |
| PYHIN1     | 0.289228025 | 2.25E-43  | Cyto_CD8.T_GZMB_GNLY |
| DHRS7      | 0.267752909 | 3.19E-43  | Cyto_CD8.T_GZMB_GNLY |

|          |             |          |                      |
|----------|-------------|----------|----------------------|
| METRNL   | 0.285618475 | 3.95E-35 | Cyto_CD8.T_GZMB_GNLY |
| CD53     | 0.251407756 | 4.54E-34 | Cyto_CD8.T_GZMB_GNLY |
| GIMAP7   | 0.279643787 | 6.86E-34 | Cyto_CD8.T_GZMB_GNLY |
| XCL2     | 0.400140166 | 1.40E-33 | Cyto_CD8.T_GZMB_GNLY |
| SERPINB1 | 0.255816972 | 5.65E-31 | Cyto_CD8.T_GZMB_GNLY |
| CD52     | 0.38928624  | 1.13E-28 | Cyto_CD8.T_GZMB_GNLY |
| NEAT1    | 0.251234827 | 5.34E-06 | Cyto_CD8.T_GZMB_GNLY |

**j. Exhaustion\_CD8.T\_RGS1**

| Gene symbol | avg_log2FC  | p_val_adj | Upregulated group     | Description                                            | pvalue      | geneID                                                                                                | Count |
|-------------|-------------|-----------|-----------------------|--------------------------------------------------------|-------------|-------------------------------------------------------------------------------------------------------|-------|
| RGS1        | 1.287563635 | 1.72E-225 | Exhaustion_CD8.T_RGS1 | Ribosome                                               | 1.13E-15    | RPL3/RPL13/RPL23A/RPL26/RPL27A/RPL38/RPL41/RPS9/RPS14/RPS18/RPS19/RPS25/RPS27/RPS29/RPL13A/RPS27L     | 16    |
| CD8B        | 0.823992358 | 2.29E-211 | Exhaustion_CD8.T_RGS1 | Coronavirus disease - COVID-19                         | 2.88E-14    | JUN/RPL3/RPL13/RPL23A/RPL26/RPL27A/RPL38/RPL41/RPS9/RPS14/RPS18/RPS19/RPS25/RPS27/RPS29/RPL13A/RPS27L | 17    |
| RPS27       | 0.480426564 | 4.21E-181 | Exhaustion_CD8.T_RGS1 | Primary immunodeficiency                               | 3.17E-09    | CD3D/CD3E/CD8A/CD8B/IL7R/PTPRC/ICOS                                                                   | 7     |
| CD3D        | 0.778369972 | 1.34E-169 | Exhaustion_CD8.T_RGS1 | T cell receptor signaling pathway                      | 1.53E-08    | CD3D/CD3E/CD3G/CD8A/CD8B/JUN/PDCD1/PTPRC/ICOS                                                         | 9     |
| CD2         | 0.811271311 | 5.63E-160 | Exhaustion_CD8.T_RGS1 | Hematopoietic cell lineage                             | 1.79E-07    | CD2/CD3D/CD3E/CD3G/CD8A/CD8B/CD44/IL7R                                                                | 8     |
| BCL11B      | 0.744409504 | 2.78E-158 | Exhaustion_CD8.T_RGS1 | PD-L1 expression and PD-1 checkpoint pathway in cancer | 2.00E-05    | CD3D/CD3E/CD3G/JUN/PDCD1/EML4                                                                         | 6     |
| TMSB4X      | 0.478433376 | 1.13E-155 | Exhaustion_CD8.T_RGS1 | Epstein-Barr virus infection                           | 3.78E-05    | CD3D/CD3E/CD3G/CD44/CDKN1B/RBPJ/JUN/TNFAIP3                                                           | 8     |
| ZFP36L2     | 0.827474783 | 3.18E-145 | Exhaustion_CD8.T_RGS1 | Measles                                                | 0.000241791 | CD3D/CD3E/CD3G/CDKN1B/JUN/TNFAIP3                                                                     | 6     |
| RPS29       | 0.507359268 | 2.70E-142 | Exhaustion_CD8.T_RGS1 | Th1 and Th2 cell differentiation                       | 0.00028689  | CD3D/CD3E/CD3G/RBPJ/JUN                                                                               | 5     |
| SAMSN1      | 0.850978412 | 8.99E-136 | Exhaustion_CD8.T_RGS1 | Cell adhesion molecules                                | 0.000351993 | CD2/CD8A/CD8B/PDCD1/PTPRC/ICOS                                                                        | 6     |
| CD3G        | 0.595034725 | 2.12E-130 | Exhaustion_CD8.T_RGS1 | Human immunodeficiency virus 1 infection               | 0.002215404 | CALM2/CD3D/CD3E/CD3G/JUN/CXCR4                                                                        | 6     |
| CD27        | 0.472340585 | 1.62E-120 | Exhaustion_CD8.T_RGS1 | Chagas disease                                         | 0.004015011 | CD3D/CD3E/CD3G/JUN                                                                                    | 4     |
| SIT1        | 0.410782039 | 1.75E-117 | Exhaustion_CD8.T_RGS1 | Th17 cell differentiation                              | 0.004922677 | CD3D/CD3E/CD3G/JUN                                                                                    | 4     |
| CLEC2D      | 0.69875659  | 1.92E-116 | Exhaustion_CD8.T_RGS1 | Yersinia infection                                     | 0.011261962 | CD8A/CD8B/FYB1/JUN                                                                                    | 4     |
| TRAC        | 0.620427814 | 2.99E-110 | Exhaustion_CD8.T_RGS1 | TNF signaling pathway                                  | 0.034714753 | JUN/JUNB/TNFAIP3                                                                                      | 3     |
| RPS18       | 0.428146878 | 3.09E-106 | Exhaustion_CD8.T_RGS1 | Intestinal immune network for IgA production           | 0.039124787 | CXCR4/ICOS                                                                                            | 2     |
| RPL41       | 0.298778751 | 9.39E-98  | Exhaustion_CD8.T_RGS1 | Cytokine-cytokine receptor interaction                 | 0.03967966  | CD27/IL7R/TNFRSF9/CXCR4/IL32                                                                          | 5     |
| ICOS        | 0.402003539 | 5.16E-92  | Exhaustion_CD8.T_RGS1 | Cholesterol metabolism                                 | 0.040590946 | APOA1/APOC3                                                                                           | 2     |
| COTL1       | 0.511900403 | 1.66E-90  | Exhaustion_CD8.T_RGS1 |                                                        |             |                                                                                                       |       |
| DUSP4       | 0.441026756 | 6.38E-89  | Exhaustion_CD8.T_RGS1 |                                                        |             |                                                                                                       |       |
| CD8A        | 0.523916222 | 1.52E-88  | Exhaustion_CD8.T_RGS1 |                                                        |             |                                                                                                       |       |
| RPL26       | 0.342746705 | 2.84E-88  | Exhaustion_CD8.T_RGS1 |                                                        |             |                                                                                                       |       |
| RPL23A      | 0.365063251 | 1.54E-85  | Exhaustion_CD8.T_RGS1 |                                                        |             |                                                                                                       |       |
| RPS14       | 0.3191622   | 2.53E-80  | Exhaustion_CD8.T_RGS1 |                                                        |             |                                                                                                       |       |
| RPL13       | 0.283534939 | 5.16E-79  | Exhaustion_CD8.T_RGS1 |                                                        |             |                                                                                                       |       |
| CXCR4       | 0.522095868 | 5.78E-78  | Exhaustion_CD8.T_RGS1 |                                                        |             |                                                                                                       |       |
| ALB         | 0.55106617  | 5.98E-76  | Exhaustion_CD8.T_RGS1 |                                                        |             |                                                                                                       |       |
| RPS9        | 0.362378509 | 4.76E-75  | Exhaustion_CD8.T_RGS1 |                                                        |             |                                                                                                       |       |
| RPS19       | 0.387024481 | 7.46E-75  | Exhaustion_CD8.T_RGS1 |                                                        |             |                                                                                                       |       |
| RPS25       | 0.325001381 | 2.64E-73  | Exhaustion_CD8.T_RGS1 |                                                        |             |                                                                                                       |       |
| PDCD1       | 0.250584369 | 1.88E-71  | Exhaustion_CD8.T_RGS1 |                                                        |             |                                                                                                       |       |
| TRBC2       | 0.64183012  | 5.82E-68  | Exhaustion_CD8.T_RGS1 |                                                        |             |                                                                                                       |       |
| RCAN3       | 0.329112517 | 5.09E-67  | Exhaustion_CD8.T_RGS1 |                                                        |             |                                                                                                       |       |
| IL32        | 0.44041774  | 7.62E-65  | Exhaustion_CD8.T_RGS1 |                                                        |             |                                                                                                       |       |
| LEPROTL1    | 0.473765649 | 2.68E-62  | Exhaustion_CD8.T_RGS1 |                                                        |             |                                                                                                       |       |
| CYTOR       | 0.49154356  | 9.49E-60  | Exhaustion_CD8.T_RGS1 |                                                        |             |                                                                                                       |       |
| JUN         | 0.507508894 | 4.73E-57  | Exhaustion_CD8.T_RGS1 |                                                        |             |                                                                                                       |       |
| SRSF7       | 0.413894955 | 1.93E-56  | Exhaustion_CD8.T_RGS1 |                                                        |             |                                                                                                       |       |
| ITM2A       | 0.494314565 | 2.20E-54  | Exhaustion_CD8.T_RGS1 |                                                        |             |                                                                                                       |       |
| JUNB        | 0.427147327 | 1.99E-53  | Exhaustion_CD8.T_RGS1 |                                                        |             |                                                                                                       |       |
| RPL27A      | 0.344243003 | 9.37E-53  | Exhaustion_CD8.T_RGS1 |                                                        |             |                                                                                                       |       |
| HP          | 0.457259786 | 1.38E-52  | Exhaustion_CD8.T_RGS1 |                                                        |             |                                                                                                       |       |
| TNFAIP3     | 0.403562439 | 6.51E-51  | Exhaustion_CD8.T_RGS1 |                                                        |             |                                                                                                       |       |
| CD3E        | 0.348950473 | 4.41E-50  | Exhaustion_CD8.T_RGS1 |                                                        |             |                                                                                                       |       |
| RGCC        | 0.421655655 | 1.56E-45  | Exhaustion_CD8.T_RGS1 |                                                        |             |                                                                                                       |       |
| HINT1       | 0.307766864 | 6.83E-43  | Exhaustion_CD8.T_RGS1 |                                                        |             |                                                                                                       |       |
| RPL3        | 0.255112016 | 7.62E-43  | Exhaustion_CD8.T_RGS1 |                                                        |             |                                                                                                       |       |
| SARAF       | 0.348500906 | 1.52E-41  | Exhaustion_CD8.T_RGS1 |                                                        |             |                                                                                                       |       |
| RESF1       | 0.402172047 | 4.35E-41  | Exhaustion_CD8.T_RGS1 |                                                        |             |                                                                                                       |       |

|           |             |          |                       |
|-----------|-------------|----------|-----------------------|
| PAG1      | 0.316176177 | 4.35E-41 | Exhaustion_CD8.T_RGS1 |
| LIME1     | 0.346084254 | 1.03E-40 | Exhaustion_CD8.T_RGS1 |
| GPR183    | 0.272800026 | 2.22E-39 | Exhaustion_CD8.T_RGS1 |
| BTG1      | 0.28429722  | 1.90E-38 | Exhaustion_CD8.T_RGS1 |
| CALM2     | 0.311617833 | 5.29E-38 | Exhaustion_CD8.T_RGS1 |
| PTPRC     | 0.297486211 | 7.24E-36 | Exhaustion_CD8.T_RGS1 |
| CD44      | 0.345518408 | 8.24E-35 | Exhaustion_CD8.T_RGS1 |
| TERF2IP   | 0.383036379 | 1.38E-33 | Exhaustion_CD8.T_RGS1 |
| CDC42SE2  | 0.348648213 | 7.86E-33 | Exhaustion_CD8.T_RGS1 |
| RPL13A    | 0.260109474 | 2.88E-32 | Exhaustion_CD8.T_RGS1 |
| PDCD4     | 0.327482305 | 1.97E-31 | Exhaustion_CD8.T_RGS1 |
| OST4      | 0.25961421  | 4.70E-31 | Exhaustion_CD8.T_RGS1 |
| RGS10     | 0.250266425 | 6.20E-31 | Exhaustion_CD8.T_RGS1 |
| FYB1      | 0.368450637 | 4.19E-30 | Exhaustion_CD8.T_RGS1 |
| CYTIP     | 0.334114977 | 5.05E-29 | Exhaustion_CD8.T_RGS1 |
| RPL38     | 0.269603382 | 2.17E-28 | Exhaustion_CD8.T_RGS1 |
| TSC22D3   | 0.390235552 | 8.03E-28 | Exhaustion_CD8.T_RGS1 |
| EML4      | 0.317903527 | 9.77E-28 | Exhaustion_CD8.T_RGS1 |
| ORM1      | 0.306472506 | 9.07E-27 | Exhaustion_CD8.T_RGS1 |
| RBPJ      | 0.256458386 | 4.50E-26 | Exhaustion_CD8.T_RGS1 |
| PPP1R2    | 0.304627821 | 2.85E-25 | Exhaustion_CD8.T_RGS1 |
| TNFRSF9   | 0.268993187 | 1.28E-23 | Exhaustion_CD8.T_RGS1 |
| CD52      | 0.277252648 | 2.89E-22 | Exhaustion_CD8.T_RGS1 |
| STK17B    | 0.309002273 | 3.31E-22 | Exhaustion_CD8.T_RGS1 |
| CDKN1B    | 0.28758097  | 8.38E-22 | Exhaustion_CD8.T_RGS1 |
| NDUFS5    | 0.258126635 | 4.48E-21 | Exhaustion_CD8.T_RGS1 |
| APOA1     | 0.294390568 | 4.51E-21 | Exhaustion_CD8.T_RGS1 |
| APOC3     | 0.254246012 | 4.22E-20 | Exhaustion_CD8.T_RGS1 |
| STK4      | 0.281290776 | 6.89E-20 | Exhaustion_CD8.T_RGS1 |
| CRIP1     | 0.347784785 | 8.83E-19 | Exhaustion_CD8.T_RGS1 |
| LINC-PINT | 0.270503827 | 9.72E-19 | Exhaustion_CD8.T_RGS1 |
| EMB       | 0.264706925 | 1.92E-18 | Exhaustion_CD8.T_RGS1 |
| PTPN22    | 0.270350778 | 3.30E-17 | Exhaustion_CD8.T_RGS1 |
| GCC2      | 0.261971236 | 2.67E-15 | Exhaustion_CD8.T_RGS1 |
| RPS27L    | 0.263083543 | 4.37E-15 | Exhaustion_CD8.T_RGS1 |
| GZMK      | 0.282149154 | 4.50E-12 | Exhaustion_CD8.T_RGS1 |
| IL7R      | 0.270267239 | 2.99E-11 | Exhaustion_CD8.T_RGS1 |

#### k. Exhaustion\_CD8.T\_RGS1\_VCAM1\_CRT

| Gene symbol | avg_log2FC  | p_val_adj | Upregulated group                 | Description                               | pvalue      | geneID                                                                    | Count |
|-------------|-------------|-----------|-----------------------------------|-------------------------------------------|-------------|---------------------------------------------------------------------------|-------|
| CRTAM       | 2.448701794 | 0         | Exhaustion_CD8.T_RGS1_VCAM1_CRTAM | Coronavirus disease - COVID-19            | 3.36E-07    | NFKB1/PIK3R1/RPL3/RPL21/RPL27A/RPL37A/RPS9/RPS18/RPS20/RPS27/RPS29/RPL13A | 12    |
| VCAM1       | 0.845384119 | 6.44E-51  | Exhaustion_CD8.T_RGS1_VCAM1_CRTAM | Ribosome                                  | 5.64E-07    | RPL3/RPL21/RPL27A/RPL37A/RPS9/RPS18/RPS20/RPS27/RPS29/RPL13A              | 10    |
| TIGIT       | 0.691640437 | 2.82E-46  | Exhaustion_CD8.T_RGS1_VCAM1_CRTAM | Epstein-Barr virus infection              | 3.77E-05    | FAS/CCND2/HLA-A/HLA-DQA1/HLA-DQB1/NFKB1/NFKB2/PIK3R1/BCL2L11              | 9     |
| GCSAM       | 0.344416454 | 7.43E-39  | Exhaustion_CD8.T_RGS1_VCAM1_CRTAM | Allograft rejection                       | 0.000253886 | FAS/HLA-A/HLA-DQA1/HLA-DQB1                                               | 4     |
| TNFRSF9     | 0.633558178 | 6.06E-38  | Exhaustion_CD8.T_RGS1_VCAM1_CRTAM | TNF signaling pathway                     | 0.000304568 | BIRC3/FAS/JUNB/NFKB1/PIK3R1/VCAM1                                         | 6     |
| RPS29       | 0.42483448  | 3.71E-31  | Exhaustion_CD8.T_RGS1_VCAM1_CRTAM | Graft-versus-host disease                 | 0.000375555 | FAS/HLA-A/HLA-DQA1/HLA-DQB1                                               | 4     |
| PIK3R1      | 0.714722853 | 2.42E-27  | Exhaustion_CD8.T_RGS1_VCAM1_CRTAM | Type I diabetes mellitus                  | 0.000411516 | FAS/HLA-A/HLA-DQA1/HLA-DQB1                                               | 4     |
| RGS1        | 0.69788943  | 2.73E-27  | Exhaustion_CD8.T_RGS1_VCAM1_CRTAM | FoxO signaling pathway                    | 0.000703987 | BRAF/CCND2/PIK3R1/STK4/BCL2L11/GABARAPL1                                  | 6     |
| HLA-A       | 0.34725431  | 6.22E-27  | Exhaustion_CD8.T_RGS1_VCAM1_CRTAM | Natural killer cell mediated cytotoxicity | 0.000703987 | FAS/BRAF/FYN/HLA-A/SH2D1A/PIK3R1                                          | 6     |
| CXCR4       | 0.524340996 | 6.78E-27  | Exhaustion_CD8.T_RGS1_VCAM1_CRTAM | Apoptosis                                 | 0.000857187 | BIRC3/FAS/NFKB1/PIK3R1/TUBA4A/BCL2L11                                     | 6     |
| TMSB4X      | 0.34179719  | 8.72E-26  | Exhaustion_CD8.T_RGS1_VCAM1_CRTAM | Insulin signaling pathway                 | 0.000890698 | BRAF/CALM2/CBLB/MKNK2/PIK3R1/PPP1CB                                       | 6     |
| PDCD4       | 0.525774359 | 1.43E-23  | Exhaustion_CD8.T_RGS1_VCAM1_CRTAM | Autoimmune thyroid disease                | 0.000917839 | FAS/HLA-A/HLA-DQA1/HLA-DQB1                                               | 4     |
| LYST        | 0.486821501 | 3.31E-21  | Exhaustion_CD8.T_RGS1_VCAM1_CRTAM | Transcriptional misregulation in cancer   | 0.000975883 | BIRC3/CCND2/DDX5/KMT2A/NFKB1/REL/NR4A3                                    | 7     |
| BIRC3       | 0.584597913 | 4.18E-21  | Exhaustion_CD8.T_RGS1_VCAM1_CRTAM | Viral carcinogenesis                      | 0.001389186 | CCND2/DDX3X/HLA-A/NFKB1/NFKB2/PIK3R1/REL                                  | 7     |
| GZMK        | 0.449913669 | 2.74E-20  | Exhaustion_CD8.T_RGS1_VCAM1_CRTAM | Viral myocarditis                         | 0.001463752 | FYN/HLA-A/HLA-DQA1/HLA-DQB1                                               | 4     |
| RPS27       | 0.293447182 | 2.76E-20  | Exhaustion_CD8.T_RGS1_VCAM1_CRTAM | C-type lectin receptor signaling pathway  | 0.001616696 | CALM2/CBLB/NFKB1/NFKB2/PIK3R1                                             | 5     |
| CEMIP2      | 0.51365915  | 1.59E-19  | Exhaustion_CD8.T_RGS1_VCAM1_CRTAM | Cellular senescence                       | 0.001741943 | CALM2/CCND2/HLA-A/NFKB1/PIK3R1/PPP1CB                                     | 6     |
| RPS18       | 0.331062216 | 3.16E-19  | Exhaustion_CD8.T_RGS1_VCAM1_CRTAM | cAMP signaling pathway                    | 0.002196584 | ATP1B3/BRAF/CALM2/NFKB1/PDE4B/PIK3R1/PPP1CB                               | 7     |
| CMC1        | 0.609765909 | 5.80E-19  | Exhaustion_CD8.T_RGS1_VCAM1_CRTAM | Acute myeloid leukemia                    | 0.002203496 | BRAF/NFKB1/PIK3R1/TCF7                                                    | 4     |
| PIM3        | 0.399634363 | 2.48E-18  | Exhaustion_CD8.T_RGS1_VCAM1_CRTAM | Herpes simplex virus 1 infection          | 0.002224263 | BIRC3/FAS/HLA-A/HLA-DQA1/HLA-DQB1/NFKB1/PIK3R1/PPP1CB/SRSF2/SRSF7/ZNF331  | 11    |



|          |             |          |                                   |                                                      |             |                                                  |   |
|----------|-------------|----------|-----------------------------------|------------------------------------------------------|-------------|--------------------------------------------------|---|
| REL      | 0.458491122 | 2.56E-17 | Exhaustion_CD8.T_RGS1_VCAM1_CRTAM | Human T-cell leukemia virus 1 infection              | 0.00225345  | CCND2/HLA-A/HLA-DQA1/HLA-DQB1/NFKB1/NFKB2/PIK3R1 | 7 |
| SYTL3    | 0.419900883 | 3.70E-17 | Exhaustion_CD8.T_RGS1_VCAM1_CRTAM | Osteoclast differentiation                           | 0.003996037 | FYN/JUNB/NFKB1/NFKB2/PIK3R1                      | 5 |
| RPL3     | 0.285691903 | 9.87E-16 | Exhaustion_CD8.T_RGS1_VCAM1_CRTAM | Kaposi sarcoma-associated herpesvirus infection      | 0.005146735 | FAS/CALM2/HLA-A/NFKB1/PIK3R1/TCF7                | 6 |
| YPEL5    | 0.418224222 | 1.81E-15 | Exhaustion_CD8.T_RGS1_VCAM1_CRTAM | Colorectal cancer                                    | 0.005430994 | BRAF/PIK3R1/TCF7/BCL2L11                         | 4 |
| DDX5     | 0.353802181 | 3.92E-15 | Exhaustion_CD8.T_RGS1_VCAM1_CRTAM | Measles                                              | 0.005665647 | FAS/CBLB/CCND2/NFKB1/PIK3R1                      | 5 |
| SRSF7    | 0.374702863 | 4.26E-15 | Exhaustion_CD8.T_RGS1_VCAM1_CRTAM | Focal adhesion                                       | 0.006103929 | BIRC3/BRAF/CCND2/FYN/PIK3R1/PPP1CB               | 6 |
| PRDM2    | 0.343731022 | 7.30E-15 | Exhaustion_CD8.T_RGS1_VCAM1_CRTAM | Proteoglycans in cancer                              | 0.006706158 | FAS/BRAF/DDX5/PIK3R1/PPP1CB/PDCD4                | 6 |
| TCF7     | 0.381824294 | 7.59E-15 | Exhaustion_CD8.T_RGS1_VCAM1_CRTAM | Intestinal immune network for IgA production         | 0.007564284 | HLA-DQA1/HLA-DQB1/CXCR4                          | 3 |
| RPL27A   | 0.341514311 | 2.42E-14 | Exhaustion_CD8.T_RGS1_VCAM1_CRTAM | Cell adhesion molecules                              | 0.007566147 | HLA-A/HLA-DQA1/HLA-DQB1/VCAM1/TIGIT              | 5 |
| TNFSF9   | 0.38701508  | 1.28E-13 | Exhaustion_CD8.T_RGS1_VCAM1_CRTAM | Human immunodeficiency virus 1 infection             | 0.007862686 | FAS/CALM2/HLA-A/NFKB1/PIK3R1/CXCR4               | 6 |
| HLA-DQB1 | 0.381573426 | 3.03E-13 | Exhaustion_CD8.T_RGS1_VCAM1_CRTAM | Prostate cancer                                      | 0.008282835 | BRAF/NFKB1/PIK3R1/TCF7                           | 4 |
| CCND2    | 0.378797809 | 6.35E-13 | Exhaustion_CD8.T_RGS1_VCAM1_CRTAM | Lipid and atherosclerosis                            | 0.008400109 | FAS/CALM2/NFKB1/PIK3R1/PPP1CB/TANK               | 6 |
| RPL21    | 0.276441884 | 6.39E-13 | Exhaustion_CD8.T_RGS1_VCAM1_CRTAM | Hippo signaling pathway                              | 0.009377417 | BIRC3/CCND2/SMAD7/PPP1CB/TCF7                    | 5 |
| RPS9     | 0.266342503 | 9.55E-13 | Exhaustion_CD8.T_RGS1_VCAM1_CRTAM | Human cytomegalovirus infection                      | 0.010383433 | FAS/CALM2/HLA-A/NFKB1/PIK3R1/CXCR4               | 6 |
| JUNB     | 0.358194239 | 1.06E-12 | Exhaustion_CD8.T_RGS1_VCAM1_CRTAM | NF-kappa B signaling pathway                         | 0.010530602 | BIRC3/NFKB1/NFKB2/VCAM1                          | 4 |
| ZNF331   | 0.397405545 | 1.63E-12 | Exhaustion_CD8.T_RGS1_VCAM1_CRTAM | T cell receptor signaling pathway                    | 0.010530602 | CBLB/FYN/NFKB1/PIK3R1                            | 4 |
| KDM6B    | 0.403850785 | 2.44E-12 | Exhaustion_CD8.T_RGS1_VCAM1_CRTAM | Hepatitis B                                          | 0.010650528 | FAS/BRAF/DDX3X/NFKB1/PIK3R1                      | 5 |
| CALM2    | 0.354675447 | 2.64E-12 | Exhaustion_CD8.T_RGS1_VCAM1_CRTAM | Endometrial cancer                                   | 0.012019558 | BRAF/PIK3R1/TCF7                                 | 3 |
| TNIP3    | 0.279076792 | 2.75E-12 | Exhaustion_CD8.T_RGS1_VCAM1_CRTAM | Influenza A                                          | 0.013232767 | FAS/HLA-DQA1/HLA-DQB1/NFKB1/PIK3R1               | 5 |
| TUBA4A   | 0.523067097 | 3.31E-12 | Exhaustion_CD8.T_RGS1_VCAM1_CRTAM | Toxoplasmosis                                        | 0.013544752 | BIRC3/HLA-DQA1/HLA-DQB1/NFKB1                    | 4 |
| HLA-DQA1 | 0.479325452 | 3.64E-12 | Exhaustion_CD8.T_RGS1_VCAM1_CRTAM | Inflammatory bowel disease                           | 0.016335019 | HLA-DQA1/HLA-DQB1/NFKB1                          | 3 |
| SUB1     | 0.315484289 | 8.50E-12 | Exhaustion_CD8.T_RGS1_VCAM1_CRTAM | Neurotrophin signaling pathway                       | 0.016592807 | BRAF/CALM2/NFKB1/PIK3R1                          | 4 |
| TANK     | 0.350167014 | 8.53E-12 | Exhaustion_CD8.T_RGS1_VCAM1_CRTAM | NOD-like receptor signaling pathway                  | 0.017666868 | BIRC3/NFKB1/TANK/NAMPT/GABARAPL1                 | 5 |
| CNOT6L   | 0.42448154  | 1.04E-11 | Exhaustion_CD8.T_RGS1_VCAM1_CRTAM | Long-term potentiation                               | 0.017707826 | BRAF/CALM2/PPP1CB                                | 3 |
| BCL2L11  | 0.273527826 | 4.77E-11 | Exhaustion_CD8.T_RGS1_VCAM1_CRTAM | RIG-I-like receptor signaling pathway                | 0.019884604 | DDX3X/NFKB1/TANK                                 | 3 |
| SKIL     | 0.349386167 | 8.17E-11 | Exhaustion_CD8.T_RGS1_VCAM1_CRTAM | Prolactin signaling pathway                          | 0.019884604 | CCND2/NFKB1/PIK3R1                               | 3 |
| SRSF2    | 0.361777805 | 9.55E-11 | Exhaustion_CD8.T_RGS1_VCAM1_CRTAM | Chemokine signaling pathway                          | 0.020835748 | BRAF/NFKB1/PIK3R1/XCL1/CXCR4                     | 5 |
| RPL13A   | 0.286609014 | 1.08E-10 | Exhaustion_CD8.T_RGS1_VCAM1_CRTAM | Non-small cell lung cancer                           | 0.021414409 | BRAF/PIK3R1/STK4                                 | 3 |
| PPP1R2   | 0.312873792 | 3.13E-10 | Exhaustion_CD8.T_RGS1_VCAM1_CRTAM | Platinum drug resistance                             | 0.022202937 | BIRC3/FAS/PIK3R1                                 | 3 |
| RPL37A   | 0.260088376 | 3.99E-10 | Exhaustion_CD8.T_RGS1_VCAM1_CRTAM | Glioma                                               | 0.023827268 | BRAF/CALM2/PIK3R1                                | 3 |
| FAM177A1 | 0.340469691 | 4.57E-10 | Exhaustion_CD8.T_RGS1_VCAM1_CRTAM | Pancreatic cancer                                    | 0.024663073 | BRAF/NFKB1/PIK3R1                                | 3 |
| NFKB1    | 0.398168873 | 6.49E-10 | Exhaustion_CD8.T_RGS1_VCAM1_CRTAM | Chronic myeloid leukemia                             | 0.024663073 | BRAF/NFKB1/PIK3R1                                | 3 |
| STK17A   | 0.339814623 | 5.54E-09 | Exhaustion_CD8.T_RGS1_VCAM1_CRTAM | Leishmaniasis                                        | 0.025514631 | HLA-DQA1/HLA-DQB1/NFKB1                          | 3 |
| SYNM     | 0.269438781 | 6.26E-09 | Exhaustion_CD8.T_RGS1_VCAM1_CRTAM | Antigen processing and presentation                  | 0.026381935 | HLA-A/HLA-DQA1/HLA-DQB1                          | 3 |
| ARID4B   | 0.339727825 | 7.64E-09 | Exhaustion_CD8.T_RGS1_VCAM1_CRTAM | Asthma                                               | 0.026782556 | HLA-DQA1/HLA-DQB1                                | 2 |
| BRAF     | 0.293555193 | 1.40E-08 | Exhaustion_CD8.T_RGS1_VCAM1_CRTAM | EGFR tyrosine kinase inhibitor resistance            | 0.027264973 | BRAF/PIK3R1/BCL2L11                              | 3 |
| ASXL2    | 0.255604746 | 1.70E-08 | Exhaustion_CD8.T_RGS1_VCAM1_CRTAM | Fluid shear stress and atherosclerosis               | 0.027549919 | CALM2/NFKB1/PIK3R1/VCAM1                         | 4 |
| SH2D1A   | 0.318376317 | 1.70E-08 | Exhaustion_CD8.T_RGS1_VCAM1_CRTAM | Apoptosis - multiple species                         | 0.028418058 | BIRC3/BCL2L11                                    | 2 |
| HCG18    | 0.324825149 | 1.93E-08 | Exhaustion_CD8.T_RGS1_VCAM1_CRTAM | ErbB signaling pathway                               | 0.03289256  | BRAF/CBLB/PIK3R1                                 | 3 |
| PTPN22   | 0.306504738 | 2.47E-08 | Exhaustion_CD8.T_RGS1_VCAM1_CRTAM | Spliceosome                                          | 0.03290665  | DDX5/HNRNPC/SRSF2/SRSF7                          | 4 |
| CDC42SE2 | 0.303764544 | 4.30E-08 | Exhaustion_CD8.T_RGS1_VCAM1_CRTAM | Breast cancer                                        | 0.03290665  | BRAF/NFKB2/PIK3R1/TCF7                           | 4 |
| XCL1     | 0.302209735 | 4.60E-08 | Exhaustion_CD8.T_RGS1_VCAM1_CRTAM | Regulation of actin cytoskeleton                     | 0.033632792 | BRAF/PIK3R1/PPP1CB/TMSB4X/CXCR4                  | 5 |
| PPP1CB   | 0.277461631 | 5.87E-08 | Exhaustion_CD8.T_RGS1_VCAM1_CRTAM | MAPK signaling pathway                               | 0.033826475 | FAS/BRAF/MKNK2/NFKB1/NFKB2/STK4                  | 6 |
| PRR7     | 0.277178938 | 1.23E-07 | Exhaustion_CD8.T_RGS1_VCAM1_CRTAM | Cytokine-cytokine receptor interaction               | 0.034310189 | FAS/TNFRSF9/XCL1/CXCR4/TNFSF9/IL32               | 6 |
| DDX17    | 0.267993127 | 1.33E-07 | Exhaustion_CD8.T_RGS1_VCAM1_CRTAM | Phagosome                                            | 0.036544652 | HLA-A/HLA-DQA1/HLA-DQB1/TUBA4A                   | 4 |
| IKZF3    | 0.275849755 | 2.21E-07 | Exhaustion_CD8.T_RGS1_VCAM1_CRTAM | Aldosterone-regulated sodium reabsorption            | 0.037168629 | ATP1B3/PIK3R1                                    | 2 |
| CHD2     | 0.303212259 | 2.50E-07 | Exhaustion_CD8.T_RGS1_VCAM1_CRTAM | African trypanosomiasis                              | 0.037168629 | FAS/VCAM1                                        | 2 |
| SMAD7    | 0.2781836   | 3.38E-07 | Exhaustion_CD8.T_RGS1_VCAM1_CRTAM | Thyroid cancer                                       | 0.037168629 | BRAF/TCF7                                        | 2 |
| STAG2    | 0.266325022 | 5.59E-07 | Exhaustion_CD8.T_RGS1_VCAM1_CRTAM | Non-alcoholic fatty liver disease                    | 0.038835281 | FAS/NFKB1/PIK3R1/BCL2L11                         | 4 |
| FAS      | 0.267788528 | 5.74E-07 | Exhaustion_CD8.T_RGS1_VCAM1_CRTAM | Th1 and Th2 cell differentiation                     | 0.040165384 | HLA-DQA1/HLA-DQB1/NFKB1                          | 3 |
| PRRC2C   | 0.27155502  | 6.68E-07 | Exhaustion_CD8.T_RGS1_VCAM1_CRTAM | Small cell lung cancer                               | 0.040165384 | BIRC3/NFKB1/PIK3R1                               | 4 |
| ZBTB1    | 0.28739425  | 6.72E-07 | Exhaustion_CD8.T_RGS1_VCAM1_CRTAM | Hepatitis C                                          | 0.040407412 | FAS/BRAF/NFKB1/PIK3R1                            | 3 |
| NR4A2    | 0.323346779 | 7.19E-07 | Exhaustion_CD8.T_RGS1_VCAM1_CRTAM | MicroRNAs in cancer                                  | 0.042112669 | CCND2/NFKB1/PIK3R1/ZEB2/BCL2L11/PDCD4            | 6 |
| STK17B   | 0.313146557 | 7.30E-07 | Exhaustion_CD8.T_RGS1_VCAM1_CRTAM | Ras signaling pathway                                | 0.042195415 | CALM2/NFKB1/PIK3R1/REL/STK4                      | 5 |
| CBLB     | 0.271343367 | 2.33E-06 | Exhaustion_CD8.T_RGS1_VCAM1_CRTAM | Inflammatory mediator regulation of TRP channels     | 0.046994863 | CALM2/PIK3R1/PPP1CB                              | 3 |
| TIPARP   | 0.339992014 | 2.46E-06 | Exhaustion_CD8.T_RGS1_VCAM1_CRTAM | Aldosterone synthesis and secretion                  | 0.046994863 | ATP1B3/CALM2/NR4A2                               | 3 |
| HNRNPC   | 0.295016165 | 2.97E-06 | Exhaustion_CD8.T_RGS1_VCAM1_CRTAM | AGE-RAGE signaling pathway in diabetic complications | 0.049391311 | NFKB1/PIK3R1/VCAM1                               | 3 |
| TERF2IP  | 0.298797403 | 3.68E-06 | Exhaustion_CD8.T_RGS1_VCAM1_CRTAM |                                                      |             |                                                  |   |
| PDE4B    | 0.29490356  | 4.12E-06 | Exhaustion_CD8.T_RGS1_VCAM1_CRTAM |                                                      |             |                                                  |   |
| RPS20    | 0.273802835 | 1.05E-05 | Exhaustion_CD8.T_RGS1_VCAM1_CRTAM |                                                      |             |                                                  |   |
| CHD1     | 0.30955847  | 1.47E-05 | Exhaustion_CD8.T_RGS1_VCAM1_CRTAM |                                                      |             |                                                  |   |
| MKNK2    | 0.263262347 | 2.20E-05 | Exhaustion_CD8.T_RGS1_VCAM1_CRTAM |                                                      |             |                                                  |   |
| PDE7A    | 0.282996188 | 2.31E-05 | Exhaustion_CD8.T_RGS1_VCAM1_CRTAM |                                                      |             |                                                  |   |

|           |             |             |                                   |
|-----------|-------------|-------------|-----------------------------------|
| RNF19A    | 0.307803259 | 3.50E-05    | Exhaustion_CD8.T_RGS1_VCAM1_CRTAM |
| OTULIN    | 0.341956305 | 3.84E-05    | Exhaustion_CD8.T_RGS1_VCAM1_CRTAM |
| ID1I      | 0.280132161 | 5.51E-05    | Exhaustion_CD8.T_RGS1_VCAM1_CRTAM |
| STK4      | 0.254790009 | 7.04E-05    | Exhaustion_CD8.T_RGS1_VCAM1_CRTAM |
| NFKB2     | 0.262867315 | 8.81E-05    | Exhaustion_CD8.T_RGS1_VCAM1_CRTAM |
| TOPORS    | 0.25227345  | 0.000114409 | Exhaustion_CD8.T_RGS1_VCAM1_CRTAM |
| FYN       | 0.278280202 | 0.000114464 | Exhaustion_CD8.T_RGS1_VCAM1_CRTAM |
| GNL3      | 0.350476128 | 0.000133323 | Exhaustion_CD8.T_RGS1_VCAM1_CRTAM |
| RANBP2    | 0.276175629 | 0.000154533 | Exhaustion_CD8.T_RGS1_VCAM1_CRTAM |
| DDX3X     | 0.272174518 | 0.000230402 | Exhaustion_CD8.T_RGS1_VCAM1_CRTAM |
| IL32      | 0.273107753 | 0.000271898 | Exhaustion_CD8.T_RGS1_VCAM1_CRTAM |
| SMAP2     | 0.285260893 | 0.000272633 | Exhaustion_CD8.T_RGS1_VCAM1_CRTAM |
| KMT2A     | 0.252666283 | 0.000479814 | Exhaustion_CD8.T_RGS1_VCAM1_CRTAM |
| GABARAPL1 | 0.250014866 | 0.000669044 | Exhaustion_CD8.T_RGS1_VCAM1_CRTAM |
| NAMPT     | 0.274130722 | 0.001227429 | Exhaustion_CD8.T_RGS1_VCAM1_CRTAM |
| ATP1B3    | 0.301965534 | 0.002023238 | Exhaustion_CD8.T_RGS1_VCAM1_CRTAM |
| FAM133B   | 0.253073768 | 0.002028412 | Exhaustion_CD8.T_RGS1_VCAM1_CRTAM |
| ZEB2      | 0.258532016 | 0.002721193 | Exhaustion_CD8.T_RGS1_VCAM1_CRTAM |
| LINC-PINT | 0.254268124 | 0.004365862 | Exhaustion_CD8.T_RGS1_VCAM1_CRTAM |
| NR4A3     | 0.266175368 | 0.004745094 | Exhaustion_CD8.T_RGS1_VCAM1_CRTAM |
| TRBC1     | 0.294953735 | 0.006306091 | Exhaustion_CD8.T_RGS1_VCAM1_CRTAM |
| TWISTNB   | 0.302688107 | 0.008376198 | Exhaustion_CD8.T_RGS1_VCAM1_CRTAM |

#### I. Exhaustion\_CD8.T\_RGS1\_VCAM1

| Gene symbol | avg_log2FC  | p_val_adj | Upregulated group           | Description                                            | pvalue      | geneID                                                                                           | Count |
|-------------|-------------|-----------|-----------------------------|--------------------------------------------------------|-------------|--------------------------------------------------------------------------------------------------|-------|
| GCSAM       | 0.603433689 | 8.36E-251 | Exhaustion_CD8.T_RGS1_VCAM1 | Ribosome                                               | 4.76E-13    | RPL3/RPL13/RPL21/RPL23A/RPL27A/RPL41/RPS6/RPS9/RPS14/RPS18/RPS19/RPS20/RPS27/RPS29/RPL13A        | 15    |
| SYNM        | 0.603095713 | 5.28E-164 | Exhaustion_CD8.T_RGS1_VCAM1 | Coronavirus disease - COVID-19                         | 1.01E-11    | PIK3R1/RPL3/RPL13/RPL21/RPL23A/RPL27A/RPL41/RPS6/RPS9/RPS14/RPS18/RPS19/RPS20/RPS27/RPS29/RPL13A | 16    |
| VCAM1       | 0.744135687 | 2.36E-143 | Exhaustion_CD8.T_RGS1_VCAM1 | Epstein-Barr virus infection                           | 2.91E-07    | FAS/CASP3/RUNX3/CD3D/CD3E/CD3G/GADD45A/HLA-A/HLA-DQA1/HLA-DQB1/PIK3R1                            | 11    |
| PIK3R1      | 0.990429693 | 7.88E-117 | Exhaustion_CD8.T_RGS1_VCAM1 | Human immunodeficiency virus 1 infection               | 4.73E-07    | FAS/CALM1/CALM2/CASP3/CD3D/CD3E/CD3G/HLA-A/KRAS/PIK3R1/CXCR4                                     | 11    |
| CCL5        | 0.670063575 | 3.18E-115 | Exhaustion_CD8.T_RGS1_VCAM1 | Natural killer cell mediated cytotoxicity              | 6.06E-06    | FAS/CASP3/FYN/HLA-A/KLRC2/KRAS/PIK3R1/HCST                                                       | 8     |
| GZMK        | 0.800231133 | 1.12E-107 | Exhaustion_CD8.T_RGS1_VCAM1 | Human cytomegalovirus infection                        | 6.70E-06    | FAS/CALM1/CALM2/CASP3/HLA-A/KRAS/PIK3R1/PRKACB/CCL5/CXCR4                                        | 10    |
| RPS29       | 0.560820813 | 1.36E-107 | Exhaustion_CD8.T_RGS1_VCAM1 | T cell receptor signaling pathway                      | 1.28E-05    | CBLB/CD3D/CD3E/CD3G/FYN/KRAS/PIK3R1                                                              | 7     |
| TRBC1       | 0.868360082 | 4.03E-107 | Exhaustion_CD8.T_RGS1_VCAM1 | TNF signaling pathway                                  | 2.08E-05    | BIRC3/FAS/CASP3/IRF1/PIK3R1/CCL5/VCAM1                                                           | 7     |
| TNIP3       | 0.410314412 | 7.92E-101 | Exhaustion_CD8.T_RGS1_VCAM1 | Lipid and atherosclerosis                              | 3.27E-05    | FAS/CALM1/CALM2/CASP3/KRAS/PIK3R1/CCL5/VCAM1/TANK                                                | 9     |
| HLA-DQA1    | 0.670524332 | 2.46E-98  | Exhaustion_CD8.T_RGS1_VCAM1 | Human T-cell leukemia virus 1 infection                | 4.20E-05    | CD3D/CD3E/CD3G/HLA-A/HLA-DQA1/HLA-DQB1/KRAS/PIK3R1/PRKACB                                        | 9     |
| CMC1        | 0.735453221 | 1.11E-97  | Exhaustion_CD8.T_RGS1_VCAM1 | Th1 and Th2 cell differentiation                       | 6.66E-05    | RUNX3/CD3D/CD3E/CD3G/HLA-DQA1/HLA-DQB1                                                           | 6     |
| TIGIT       | 0.72891027  | 3.51E-97  | Exhaustion_CD8.T_RGS1_VCAM1 | Apoptosis                                              | 7.27E-05    | BIRC3/FAS/CASP3/GADD45A/KRAS/PIK3R1/TUBA4A                                                       | 7     |
| IKZF2       | 0.506376149 | 1.00E-94  | Exhaustion_CD8.T_RGS1_VCAM1 | Insulin signaling pathway                              | 7.61E-05    | CALM1/CALM2/CBLB/KRAS/PIK3R1/PRKACB/RPS6                                                         | 7     |
| TMSB4X      | 0.447464158 | 3.42E-92  | Exhaustion_CD8.T_RGS1_VCAM1 | Measles                                                | 8.35E-05    | FAS/CASP3/CBLB/CD3D/CD3E/CD3G/PIK3R1                                                             | 7     |
| IL32        | 0.61844696  | 2.34E-84  | Exhaustion_CD8.T_RGS1_VCAM1 | Viral myocarditis                                      | 8.75E-05    | CASP3/FYN/HLA-A/HLA-DQA1/HLA-DQB1                                                                | 5     |
| RGS1        | 0.692746088 | 1.59E-78  | Exhaustion_CD8.T_RGS1_VCAM1 | Chagas disease                                         | 0.000118479 | FAS/CD3D/CD3E/CD3G/PIK3R1/CCL5                                                                   | 6     |
| SUB1        | 0.554534641 | 3.54E-78  | Exhaustion_CD8.T_RGS1_VCAM1 | C-type lectin receptor signaling pathway               | 0.000131938 | CALM1/CALM2/CBLB/IRF1/KRAS/PIK3R1                                                                | 6     |
| RPS27       | 0.396003854 | 3.66E-77  | Exhaustion_CD8.T_RGS1_VCAM1 | Proteoglycans in cancer                                | 0.000151841 | FAS/CASP3/DDX5/KRAS/PIK3R1/PRKACB/RPS6/PDCD4                                                     | 8     |
| CD3D        | 0.634210758 | 7.46E-77  | Exhaustion_CD8.T_RGS1_VCAM1 | Allograft rejection                                    | 0.000187901 | FAS/HLA-A/HLA-DQA1/HLA-DQB1                                                                      | 4     |
| RPS18       | 0.435729791 | 2.70E-69  | Exhaustion_CD8.T_RGS1_VCAM1 | Glioma                                                 | 0.000253285 | CALM1/CALM2/GADD45A/KRAS/PIK3R1                                                                  | 5     |
| HLA-DQB1    | 0.638710202 | 1.58E-66  | Exhaustion_CD8.T_RGS1_VCAM1 | Graft-versus-host disease                              | 0.000278492 | FAS/HLA-A/HLA-DQA1/HLA-DQB1                                                                      | 4     |
| KLRG1       | 0.541897804 | 9.77E-66  | Exhaustion_CD8.T_RGS1_VCAM1 | Type I diabetes mellitus                               | 0.000305308 | FAS/HLA-A/HLA-DQA1/HLA-DQB1                                                                      | 4     |
| HIST1H2BG   | 0.507702049 | 3.50E-62  | Exhaustion_CD8.T_RGS1_VCAM1 | PD-L1 expression and PD-1 checkpoint pathway in cancer | 0.000561292 | CD3D/CD3E/CD3G/KRAS/PIK3R1                                                                       | 5     |
| LYST        | 0.565371969 | 2.41E-60  | Exhaustion_CD8.T_RGS1_VCAM1 | Kaposi sarcoma-associated herpesvirus infection        | 0.000648387 | FAS/CALM1/CALM2/CASP3/HLA-A/KRAS/PIK3R1                                                          | 7     |
| RPL27A      | 0.502239708 | 4.07E-56  | Exhaustion_CD8.T_RGS1_VCAM1 | Autoimmune thyroid disease                             | 0.000684279 | FAS/HLA-A/HLA-DQA1/HLA-DQB1                                                                      | 4     |
| PDCD4       | 0.54025483  | 1.75E-55  | Exhaustion_CD8.T_RGS1_VCAM1 | Hematopoietic cell lineage                             | 0.000912347 | CD3D/CD3E/CD3G/HLA-DQA1/HLA-DQB1                                                                 | 5     |
| KLRB1       | 0.511179477 | 1.81E-55  | Exhaustion_CD8.T_RGS1_VCAM1 | Herpes simplex virus 1 infection                       | 0.001158861 | BIRC3/FAS/CASP3/HLA-A/HLA-DQA1/HLA-DQB1/PIK3R1/CCL5/SRSF5/SRSF7/ZNF331                           | 11    |
| DTHD1       | 0.346102681 | 2.49E-54  | Exhaustion_CD8.T_RGS1_VCAM1 | Cellular senescence                                    | 0.001160904 | CALM1/CALM2/GADD45A/HLA-A/KRAS/PIK3R1                                                            | 6     |
| TUBA4A      | 0.707760994 | 1.20E-53  | Exhaustion_CD8.T_RGS1_VCAM1 | Th17 cell differentiation                              | 0.001349196 | CD3D/CD3E/CD3G/HLA-DQA1/HLA-DQB1                                                                 | 5     |
| RPL3        | 0.378394884 | 2.46E-51  | Exhaustion_CD8.T_RGS1_VCAM1 | Long-term potentiation                                 | 0.001653953 | CALM1/CALM2/KRAS/PRKACB                                                                          | 4     |

|           |             |          |                             |                                                      |             |                                          |   |
|-----------|-------------|----------|-----------------------------|------------------------------------------------------|-------------|------------------------------------------|---|
| CDC42SE2  | 0.479081766 | 1.47E-50 | Exhaustion_CD8.T_RGS1_VCAM1 | Influenza A                                          | 0.001859014 | FAS/CASP3/HLA-DQA1/HLA-DQB1/PIK3R1/CCL5  | 6 |
| RPL41     | 0.251056503 | 2.41E-44 | Exhaustion_CD8.T_RGS1_VCAM1 | Platinum drug resistance                             | 0.002269957 | BIRC3/FAS/CASP3/PIK3R1                   | 4 |
| TRAT1     | 0.326173303 | 4.16E-43 | Exhaustion_CD8.T_RGS1_VCAM1 | Pertussis                                            | 0.002630499 | CALM1/CALM2/CASP3/IRF1                   | 4 |
| RPL13     | 0.252383561 | 4.42E-43 | Exhaustion_CD8.T_RGS1_VCAM1 | Antigen processing and presentation                  | 0.002891609 | HLA-A/HLA-DQA1/HLA-DQB1/KLRC2            | 4 |
| CXCR4     | 0.49096827  | 4.80E-43 | Exhaustion_CD8.T_RGS1_VCAM1 | Estrogen signaling pathway                           | 0.003939862 | CALM1/CALM2/KRAS/PIK3R1/PRKACB           | 5 |
| RPS19     | 0.333430439 | 5.56E-42 | Exhaustion_CD8.T_RGS1_VCAM1 | Apelin signaling pathway                             | 0.004063189 | CALM1/CALM2/KRAS/PRKACB/RPS6             | 5 |
| TNFSF9    | 0.406491862 | 1.10E-41 | Exhaustion_CD8.T_RGS1_VCAM1 | Colorectal cancer                                    | 0.004113901 | CASP3/GADD45A/KRAS/PIK3R1                | 4 |
| FAS       | 0.382558803 | 1.59E-41 | Exhaustion_CD8.T_RGS1_VCAM1 | Small cell lung cancer                               | 0.00523219  | BIRC3/CASP3/GADD45A/PIK3R1               | 4 |
| RPL21     | 0.351620204 | 2.49E-41 | Exhaustion_CD8.T_RGS1_VCAM1 | GnRH signaling pathway                               | 0.005436487 | CALM1/CALM2/KRAS/PRKACB                  | 4 |
| CEMIP2    | 0.51935936  | 4.23E-41 | Exhaustion_CD8.T_RGS1_VCAM1 | Cell adhesion molecules                              | 0.005453076 | HLA-A/HLA-DQA1/HLA-DQB1/VCAM1/TIGIT      | 5 |
| ASXL2     | 0.327580193 | 5.19E-41 | Exhaustion_CD8.T_RGS1_VCAM1 | Intestinal immune network for IgA production         | 0.006098928 | HLA-DQA1/HLA-DQB1/CXCR4                  | 3 |
| SRSF7     | 0.409250073 | 1.28E-40 | Exhaustion_CD8.T_RGS1_VCAM1 | Inflammatory mediator regulation of TRP channels     | 0.006538418 | CALM1/CALM2/PIK3R1/PRKACB                | 4 |
| RPL23A    | 0.332907804 | 1.09E-39 | Exhaustion_CD8.T_RGS1_VCAM1 | AGE-RAGE signaling pathway in diabetic complications | 0.007017827 | CASP3/KRAS/PIK3R1/VCAM1                  | 4 |
| DDX5      | 0.384561587 | 2.96E-39 | Exhaustion_CD8.T_RGS1_VCAM1 | Melanogenesis                                        | 0.00726604  | CALM1/CALM2/KRAS/PRKACB                  | 4 |
| CD3G      | 0.389285474 | 1.12E-38 | Exhaustion_CD8.T_RGS1_VCAM1 | Endometrial cancer                                   | 0.009730318 | GADD45A/KRAS/PIK3R1                      | 4 |
| HLA-A     | 0.280945388 | 6.51E-38 | Exhaustion_CD8.T_RGS1_VCAM1 | Toxoplasmosis                                        | 0.010387361 | BIRC3/CASP3/HLA-DQA1/HLA-DQB1            | 3 |
| GPR174    | 0.330480942 | 1.23E-37 | Exhaustion_CD8.T_RGS1_VCAM1 | Cholinergic synapse                                  | 0.010707993 | FYN/KRAS/PIK3R1/PRKACB                   | 4 |
| RPS14     | 0.262288246 | 4.04E-37 | Exhaustion_CD8.T_RGS1_VCAM1 | Longevity regulating pathway - multiple species      | 0.011672332 | KRAS/PIK3R1/PRKACB                       | 3 |
| STK17A    | 0.401958458 | 4.54E-37 | Exhaustion_CD8.T_RGS1_VCAM1 | Tuberculosis                                         | 0.011862232 | CALM1/CALM2/CASP3/HLA-DQA1/HLA-DQB1      | 5 |
| RPS6      | 0.304885284 | 4.88E-36 | Exhaustion_CD8.T_RGS1_VCAM1 | Human papillomavirus infection                       | 0.012646923 | FAS/CASP3/HLA-A/IRF1/KRAS/PIK3R1/PRKACB  | 7 |
| EIF4A2    | 0.385052065 | 1.38E-32 | Exhaustion_CD8.T_RGS1_VCAM1 | Neurotrophin signaling pathway                       | 0.012766851 | CALM1/CALM2/KRAS/PIK3R1                  | 4 |
| CALM2     | 0.372666609 | 6.76E-31 | Exhaustion_CD8.T_RGS1_VCAM1 | Fc epsilon RI signaling pathway                      | 0.014976393 | FYN/KRAS/PIK3R1                          | 3 |
| SLFN11    | 0.30836366  | 1.00E-30 | Exhaustion_CD8.T_RGS1_VCAM1 | Chemokine signaling pathway                          | 0.015336163 | KRAS/PIK3R1/PRKACB/CCL5/CXCR4            | 5 |
| TRGC2     | 0.731657166 | 1.02E-30 | Exhaustion_CD8.T_RGS1_VCAM1 | Renin secretion                                      | 0.015573302 | CALM1/CALM2/PRKACB                       | 3 |
| RPL13A    | 0.314597146 | 2.43E-27 | Exhaustion_CD8.T_RGS1_VCAM1 | Amphetamine addiction                                | 0.015573302 | CALM1/CALM2/PRKACB                       | 3 |
| RPS9      | 0.282928837 | 2.62E-27 | Exhaustion_CD8.T_RGS1_VCAM1 | Prolactin signaling pathway                          | 0.016183521 | IRF1/KRAS/PIK3R1                         | 3 |
| TANK      | 0.314474166 | 2.87E-27 | Exhaustion_CD8.T_RGS1_VCAM1 | Melanoma                                             | 0.017444005 | GADD45A/KRAS/PIK3R1                      | 3 |
| RSRP1     | 0.3811581   | 6.44E-27 | Exhaustion_CD8.T_RGS1_VCAM1 | Non-small cell lung cancer                           | 0.017444005 | GADD45A/KRAS/PIK3R1                      | 3 |
| BIRC3     | 0.356736214 | 8.68E-27 | Exhaustion_CD8.T_RGS1_VCAM1 | Prion disease                                        | 0.017455685 | CASP3/FYN/PIK3R1/PRKACB/CCL5/TUBA4A      | 6 |
| EOMES     | 0.288709624 | 5.39E-26 | Exhaustion_CD8.T_RGS1_VCAM1 | p53 signaling pathway                                | 0.018094322 | FAS/CASP3/GADD45A                        | 3 |
| YPEL5     | 0.39052006  | 1.86E-25 | Exhaustion_CD8.T_RGS1_VCAM1 | Viral carcinogenesis                                 | 0.01943707  | CASP3/HLA-A/KRAS/PIK3R1/PRKACB           | 5 |
| RPS20     | 0.329048451 | 7.05E-25 | Exhaustion_CD8.T_RGS1_VCAM1 | Gastric acid secretion                               | 0.020125813 | CALM1/CALM2/PRKACB                       | 3 |
| CALM1     | 0.28067477  | 4.32E-24 | Exhaustion_CD8.T_RGS1_VCAM1 | Pancreatic cancer                                    | 0.020125813 | GADD45A/KRAS/PIK3R1                      | 3 |
| ZEB2      | 0.383704102 | 4.65E-24 | Exhaustion_CD8.T_RGS1_VCAM1 | Chronic myeloid leukemia                             | 0.020125813 | GADD45A/KRAS/PIK3R1                      | 3 |
| TRG-AS1   | 0.361461019 | 9.81E-24 | Exhaustion_CD8.T_RGS1_VCAM1 | Phototransduction                                    | 0.020434849 | CALM1/CALM2                              | 2 |
| IRF1      | 0.359454517 | 1.10E-23 | Exhaustion_CD8.T_RGS1_VCAM1 | Fluid shear stress and atherosclerosis               | 0.021396209 | CALM1/CALM2/PIK3R1/VCAM1                 | 4 |
| TRGC1     | 0.363744222 | 1.37E-23 | Exhaustion_CD8.T_RGS1_VCAM1 | EGFR tyrosine kinase inhibitor resistance            | 0.022278412 | KRAS/PIK3R1/RPS6                         | 4 |
| HIST1H2AC | 0.29367892  | 1.43E-23 | Exhaustion_CD8.T_RGS1_VCAM1 | Autophagy - animal                                   | 0.022415702 | KRAS/PIK3R1/PRKACB/TANK                  | 3 |
| KMT2A     | 0.327500748 | 1.95E-23 | Exhaustion_CD8.T_RGS1_VCAM1 | Asthma                                               | 0.023177576 | HLA-DQA1/HLA-DQB1                        | 2 |
| CASP3     | 0.277920928 | 2.62E-23 | Exhaustion_CD8.T_RGS1_VCAM1 | MAPK signaling pathway                               | 0.024171661 | FAS/CASP3/GADD45A/KRAS/PRKACB/PTPN7      | 6 |
| LINC02446 | 0.293051669 | 2.82E-23 | Exhaustion_CD8.T_RGS1_VCAM1 | Cytokine-cytokine receptor interaction               | 0.024529406 | FAS/TNFRSF9/CCL5/CXCR4/TNFSF9/IL32       | 6 |
| TNFRSF9   | 0.276826202 | 2.89E-22 | Exhaustion_CD8.T_RGS1_VCAM1 | Apoptosis - multiple species                         | 0.024602732 | BIRC3/CASP3                              | 2 |
| RUNX3     | 0.347782581 | 4.33E-22 | Exhaustion_CD8.T_RGS1_VCAM1 | Alzheimer disease                                    | 0.026358952 | FAS/CALM1/CALM2/CASP3/KRAS/PIK3R1/TUBA4A | 7 |
| PRKACB    | 0.259577782 | 4.81E-22 | Exhaustion_CD8.T_RGS1_VCAM1 | cAMP signaling pathway                               | 0.026397684 | CALM1/CALM2/PDE4B/PIK3R1/PRKACB          | 5 |
| CD3E      | 0.285278174 | 6.92E-22 | Exhaustion_CD8.T_RGS1_VCAM1 | ErbB signaling pathway                               | 0.026947486 | CBLB/KRAS/PIK3R1                         | 3 |
| HCST      | 0.269787965 | 2.75E-21 | Exhaustion_CD8.T_RGS1_VCAM1 | Phagosome                                            | 0.028552746 | HLA-A/HLA-DQA1/HLA-DQB1/TUBA4A           | 4 |
| ZBTB1     | 0.360253558 | 4.85E-21 | Exhaustion_CD8.T_RGS1_VCAM1 | Gap junction                                         | 0.029463721 | KRAS/PRKACB/TUBA4A                       | 3 |
| ALB       | 0.264903251 | 6.33E-21 | Exhaustion_CD8.T_RGS1_VCAM1 | Oxytocin signaling pathway                           | 0.029766192 | CALM1/CALM2/KRAS/PRKACB                  | 4 |
| CBLB      | 0.278699844 | 4.89E-20 | Exhaustion_CD8.T_RGS1_VCAM1 | Longevity regulating pathway                         | 0.030329302 | KRAS/PIK3R1/PRKACB                       | 3 |
| SLC38A1   | 0.321831186 | 3.12E-19 | Exhaustion_CD8.T_RGS1_VCAM1 | Hepatitis C                                          | 0.031643334 | FAS/CASP3/KRAS/PIK3R1                    | 4 |
| NAA50     | 0.288378012 | 4.48E-19 | Exhaustion_CD8.T_RGS1_VCAM1 | Ras signaling pathway                                | 0.031660388 | CALM1/CALM2/KRAS/PIK3R1/PRKACB           | 5 |
| SYTL3     | 0.324623494 | 1.24E-18 | Exhaustion_CD8.T_RGS1_VCAM1 | Aldosterone-regulated sodium reabsorption            | 0.032242358 | KRAS/PIK3R1                              | 2 |
| GPBP1     | 0.293554424 | 1.73E-18 | Exhaustion_CD8.T_RGS1_VCAM1 | African trypanosomiasis                              | 0.032242358 | FAS/VCAM1                                | 2 |
| LINC-PINT | 0.286795231 | 2.50E-18 | Exhaustion_CD8.T_RGS1_VCAM1 | Thyroid cancer                                       | 0.032242358 | GADD45A/KRAS                             | 2 |
| TERF2IP   | 0.320844576 | 5.32E-18 | Exhaustion_CD8.T_RGS1_VCAM1 | Primary immunodeficiency                             | 0.033868943 | CD3D/CD3E                                | 2 |
| GADD45A   | 0.269957863 | 9.89E-18 | Exhaustion_CD8.T_RGS1_VCAM1 | Salivary secretion                                   | 0.033925277 | CALM1/CALM2/PRKACB                       | 3 |
| CNOT6L    | 0.293653971 | 1.21E-17 | Exhaustion_CD8.T_RGS1_VCAM1 | Rheumatoid arthritis                                 | 0.033925277 | HLA-DQA1/HLA-DQB1/CCL5                   | 3 |
| KRAS      | 0.255045925 | 1.89E-17 | Exhaustion_CD8.T_RGS1_VCAM1 | Hepatitis B                                          | 0.034924649 | FAS/CASP3/KRAS/PIK3R1                    | 4 |
| EIF5      | 0.305305769 | 5.82E-17 | Exhaustion_CD8.T_RGS1_VCAM1 | Phosphatidylinositol signaling system                | 0.037733826 | CALM1/CALM2/PIK3R1                       | 3 |
| FGFR1OP2  | 0.252563438 | 5.90E-17 | Exhaustion_CD8.T_RGS1_VCAM1 | Circadian entrainment                                | 0.037733826 | CALM1/CALM2/PRKACB                       | 3 |
| GCC2      | 0.312750951 | 8.21E-16 | Exhaustion_CD8.T_RGS1_VCAM1 | Endocrine resistance                                 | 0.038718944 | KRAS/PIK3R1/PRKACB                       | 3 |
| ARID4B    | 0.256742412 | 1.57E-15 | Exhaustion_CD8.T_RGS1_VCAM1 | Aldosterone synthesis and secretion                  | 0.038718944 | CALM1/CALM2/PRKACB                       | 3 |
| PDE4B     | 0.277333113 | 4.24E-15 | Exhaustion_CD8.T_RGS1_VCAM1 | Progesterone-mediated oocyte maturation              | 0.042790223 | KRAS/PIK3R1/PRKACB                       | 3 |

|        |             |          |                             |                              |             |                       |   |
|--------|-------------|----------|-----------------------------|------------------------------|-------------|-----------------------|---|
| SRSF5  | 0.268771928 | 1.48E-14 | Exhaustion_CD8.T_RGS1_VCAM1 | Amoebiasis                   | 0.042790223 | CASP3/PIK3R1/PRKACB   | 3 |
| WNK1   | 0.251027137 | 2.90E-14 | Exhaustion_CD8.T_RGS1_VCAM1 | NF-kappa B signaling pathway | 0.04490376  | BIRC3/GADD45A/VCAM1   | 3 |
| PTGES3 | 0.297731024 | 9.64E-14 | Exhaustion_CD8.T_RGS1_VCAM1 | Glucagon signaling pathway   | 0.0481704   | CALM1/CALM2/PRKACB    | 3 |
| FYN    | 0.273366006 | 4.47E-13 | Exhaustion_CD8.T_RGS1_VCAM1 | Axon guidance                | 0.049975133 | FYN/KRAS/PIK3R1/CXCR4 | 4 |
| IDI1   | 0.288366416 | 7.22E-13 | Exhaustion_CD8.T_RGS1_VCAM1 |                              |             |                       |   |
| PTPN7  | 0.264751575 | 2.15E-12 | Exhaustion_CD8.T_RGS1_VCAM1 |                              |             |                       |   |
| ZNF331 | 0.325492481 | 4.04E-12 | Exhaustion_CD8.T_RGS1_VCAM1 |                              |             |                       |   |
| DDX17  | 0.256145389 | 9.36E-11 | Exhaustion_CD8.T_RGS1_VCAM1 |                              |             |                       |   |
| KLRC2  | 0.264450635 | 8.73E-07 | Exhaustion_CD8.T_RGS1_VCAM1 |                              |             |                       |   |

---

**Supplementary Table 8. Related genes shared by En cell subpopulations and HCC cell subpopulations of HCC4 (related to Fig. 7 and Supplementary Figure 4)**

| Gene     | Gene     |
|----------|----------|
| A2M      | MT1G     |
| ACP5     | MT1X     |
| ADAM15   | MT2A     |
| ALPL     | NDUFB11  |
| APOA2    | NFKBIA   |
| APOC1    | NGK7     |
| APOC2    | NNMT     |
| APOH     | NPC2     |
| ASS1     | NR2F2    |
| ATP13A3  | NR4A2    |
| ATP5MC2  | PABPC1   |
| ATP6V0C  | PCBP2    |
| C19orf33 | PLAAT4   |
| CASP4    | PNRC1    |
| CCL2     | PPDPF    |
| CCL4     | PRR13    |
| CCL4L2   | RDX      |
| CCL5     | REL      |
| CCNL1    | RHOB     |
| CD74     | RNASE1   |
| CD99     | RPL11    |
| CDKN1A   | RPL12    |
| CEBPD    | RPL22    |
| CSNK2B   | RPL30    |
| CST7     | RPL32    |
| CTSB     | RPL34    |
| CXCL12   | RPL36    |
| CYP2E1   | RPL36A   |
| DCXR     | RPL39    |
| DNAJB1   | RPL5     |
| DUSP2    | RPL6     |
| EDN1     | RPLP2    |
| EEF1A1   | RPS10    |
| EEF1D    | RPS12    |
| EEF2     | RPS13    |
| FCER1G   | RPS15A   |
| FTH1     | RPS21    |
| FTL      | RPS26    |
| GABARAP  | RPS28    |
| GADD45A  | RPS4Y1   |
| GAPDH    | S100A10  |
| GLUL     | S100A4   |
| GNLY     | S100A6   |
| GPX2     | SERF2    |
| GSTA1    | SERPINA1 |
| HLA-DQA1 | SLC2A3   |
| HLA-DQB1 | SNHG29   |
| HLA-DRB5 | SNHG7    |
| HP       | SQSTM1   |
| HSPA1A   | SRGN     |
| HSPA1B   | SRP14    |
| HSPB1    | ST13     |
| HSPH1    | STMN1    |
| ICAM1    | TFF3     |
| IFI30    | TM4SF1   |
| IFITM1   | TMEM256  |
| IFITM2   | TMSB10   |
| IFITM3   | TYROBP   |
| IGFBP3   | UQCRQ    |
| KDM6B    | ZBTB16   |
| KLF4     | ZFP36L1  |
| MDK      | ZNF331   |

**Immunohistochemical staining showing increased KRT8 expressions in the resected tumors originated from the rapid recurrence HCC patients compared to the recurrence-free HCC patients.**

# rapid recurrence HCC patients

patient 1

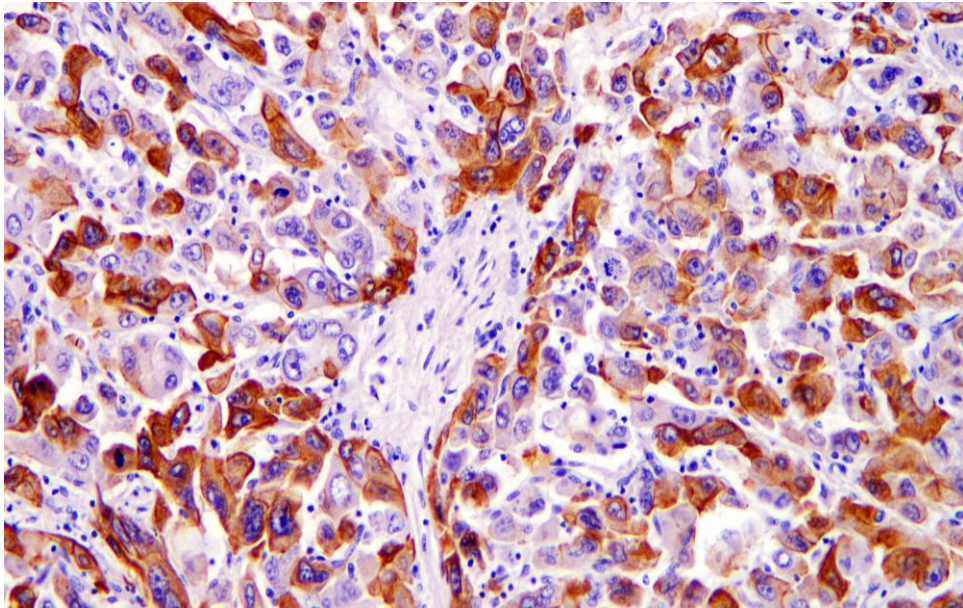

patient 2

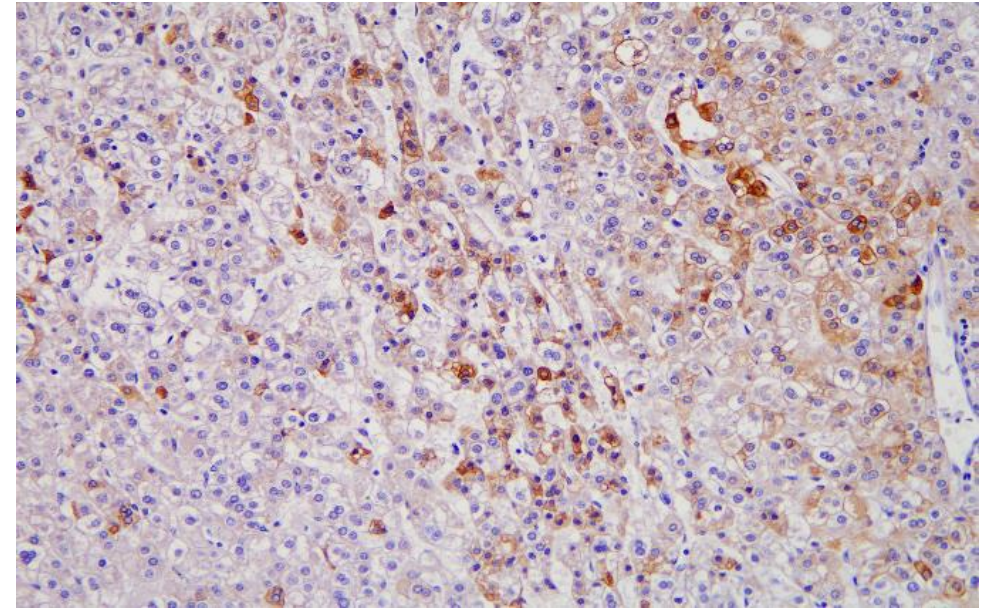

patient 3

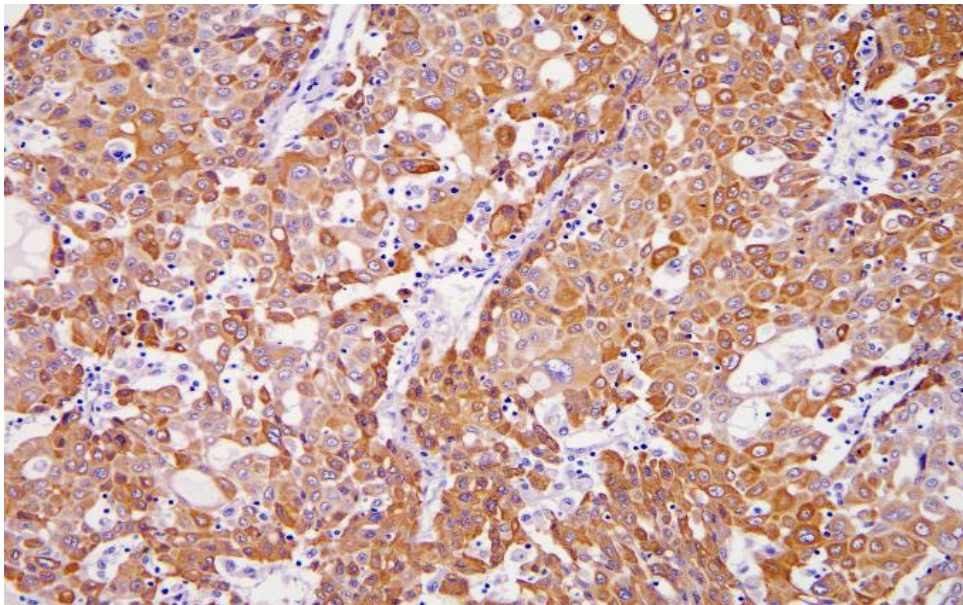

patient 4

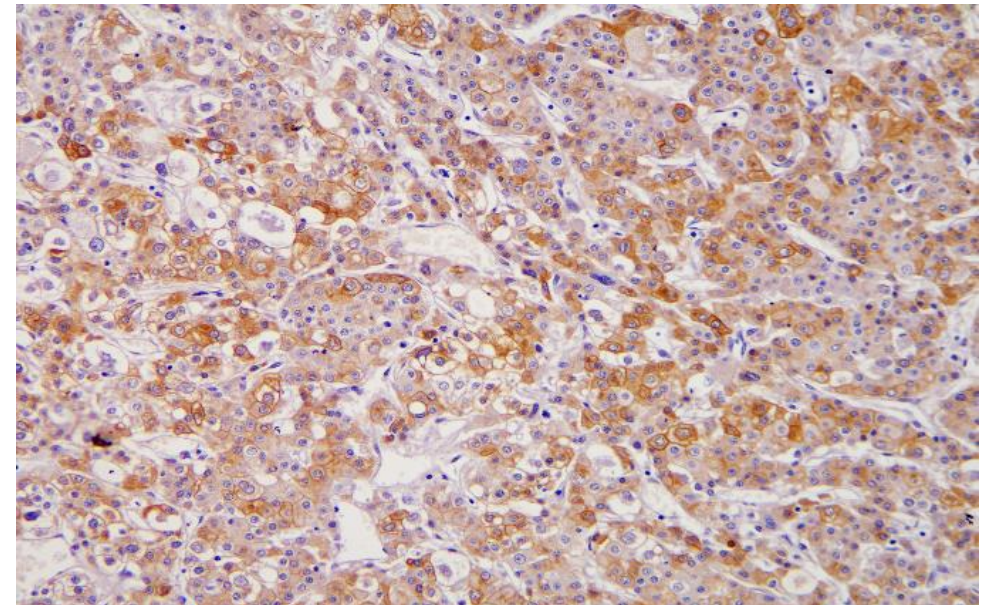

# rapid recurrence HCC patients

patient 5

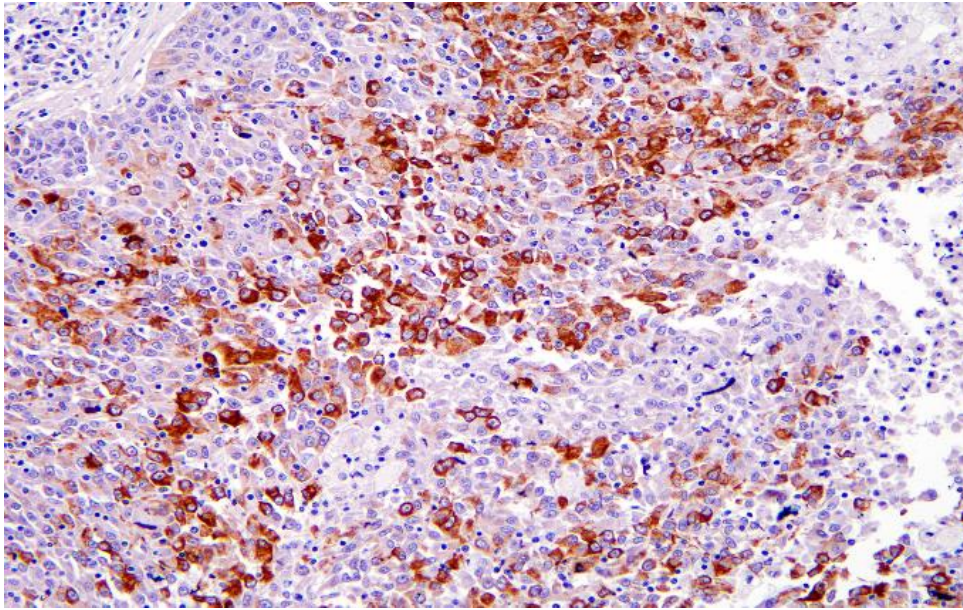

patient 6

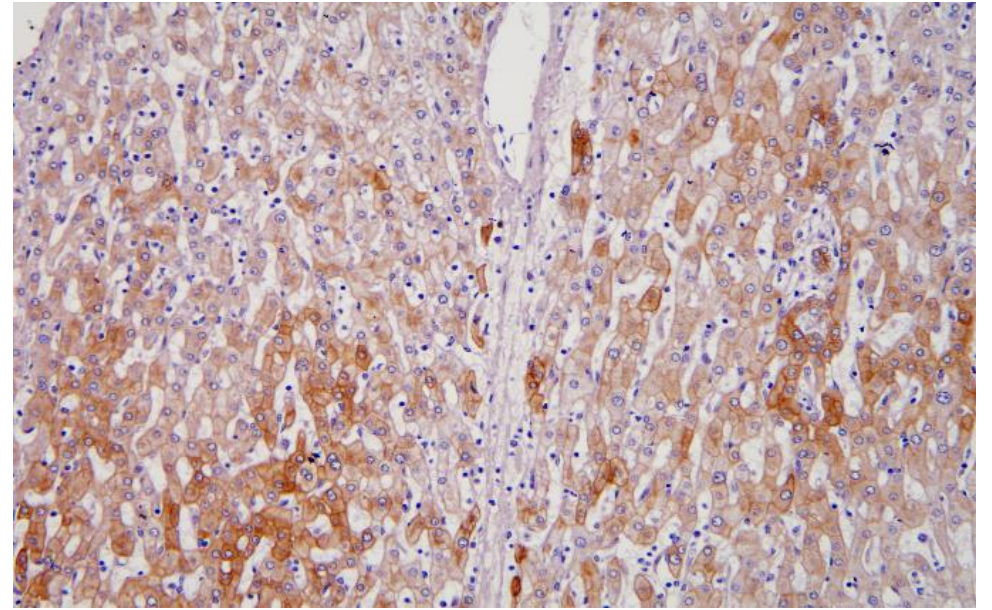

patient 7

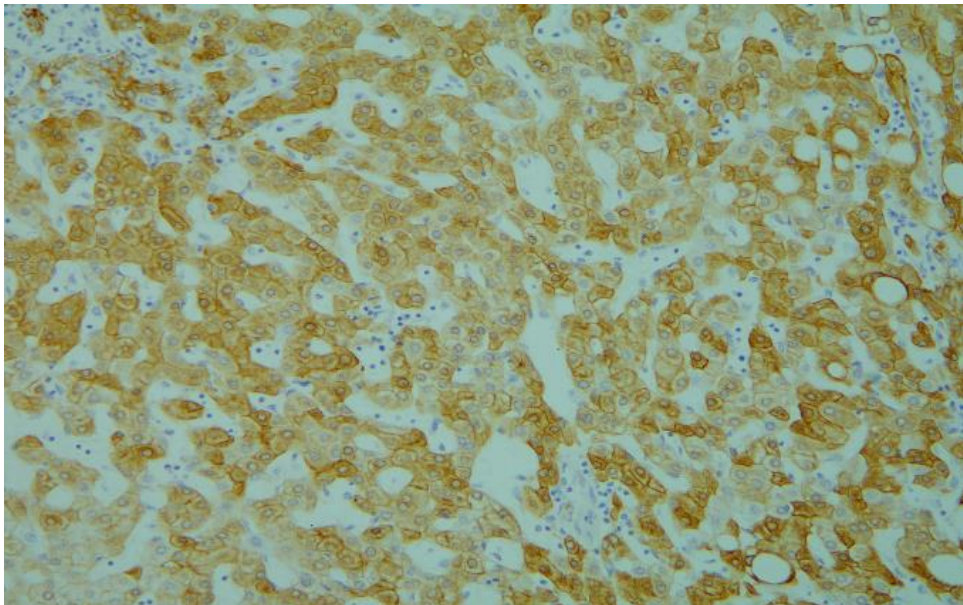

patient 8

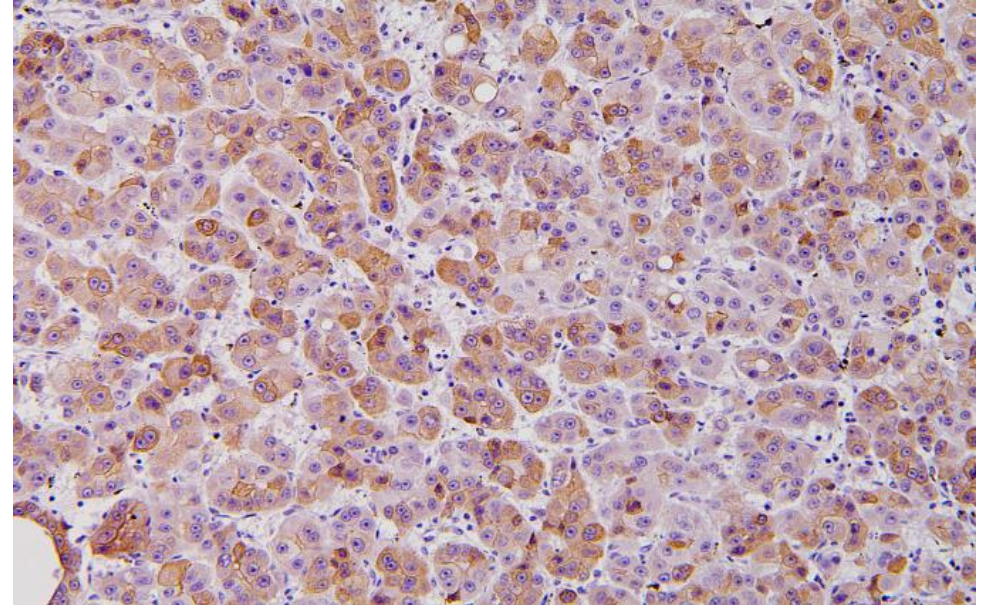



# rapid recurrence HCC patients

patient 9

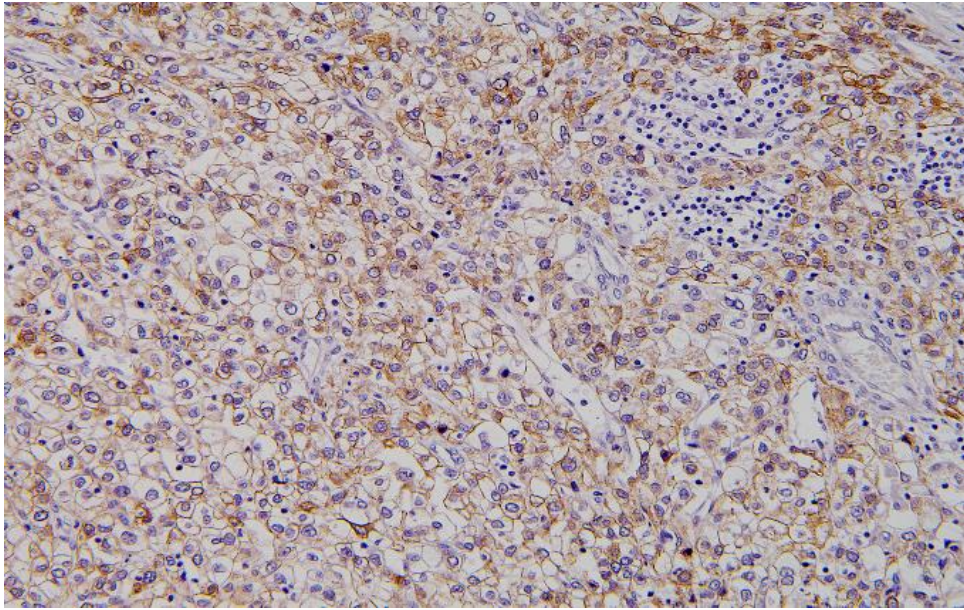

patient 10

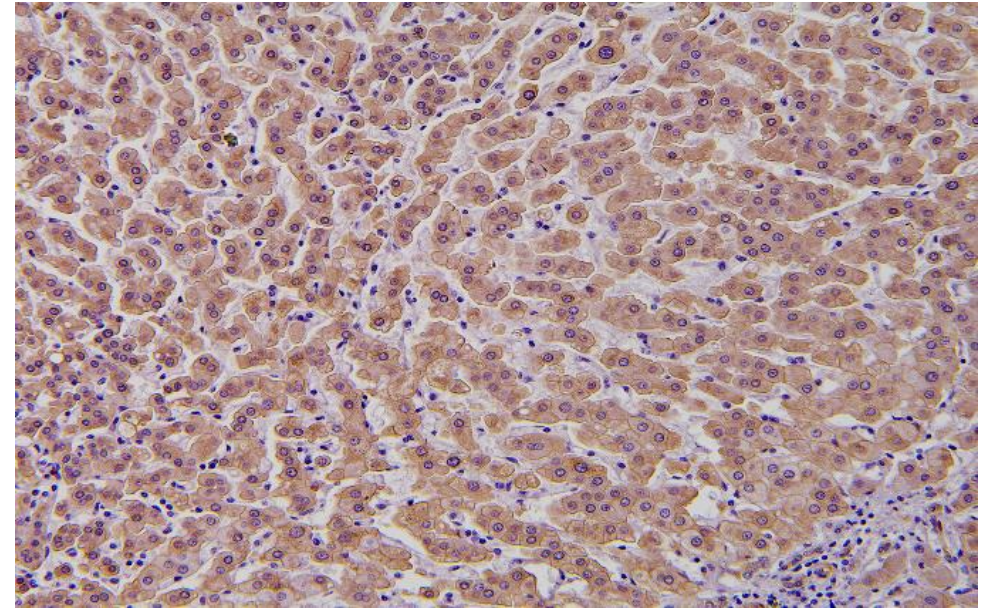

patient 11

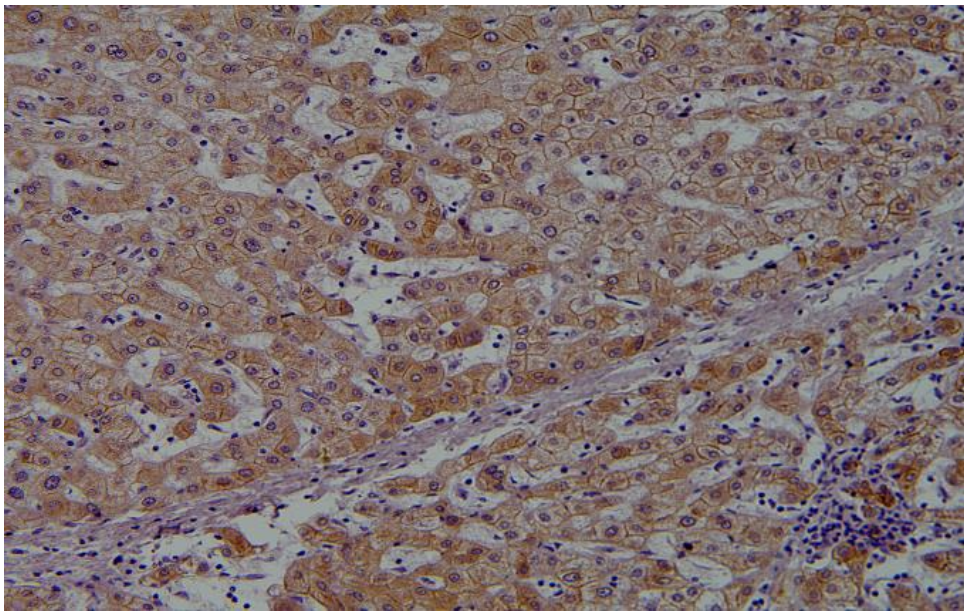

patient 12

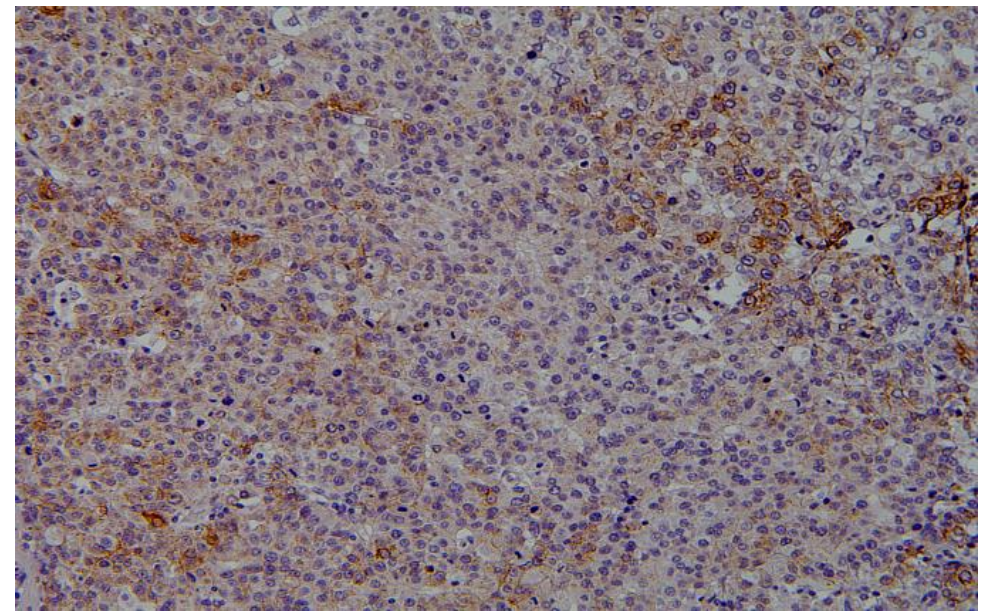

# rapid recurrence HCC patients

patient 13

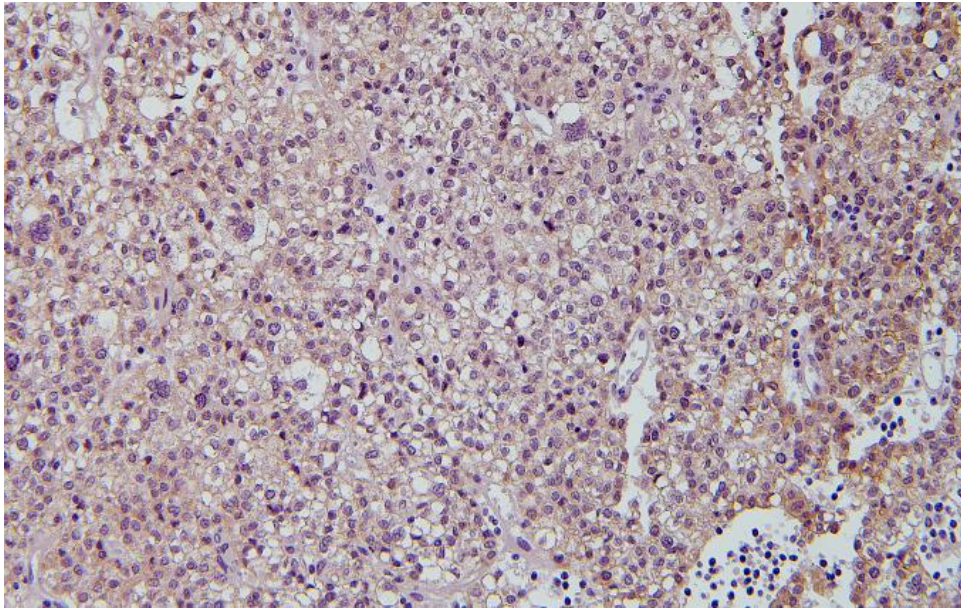

patient 14

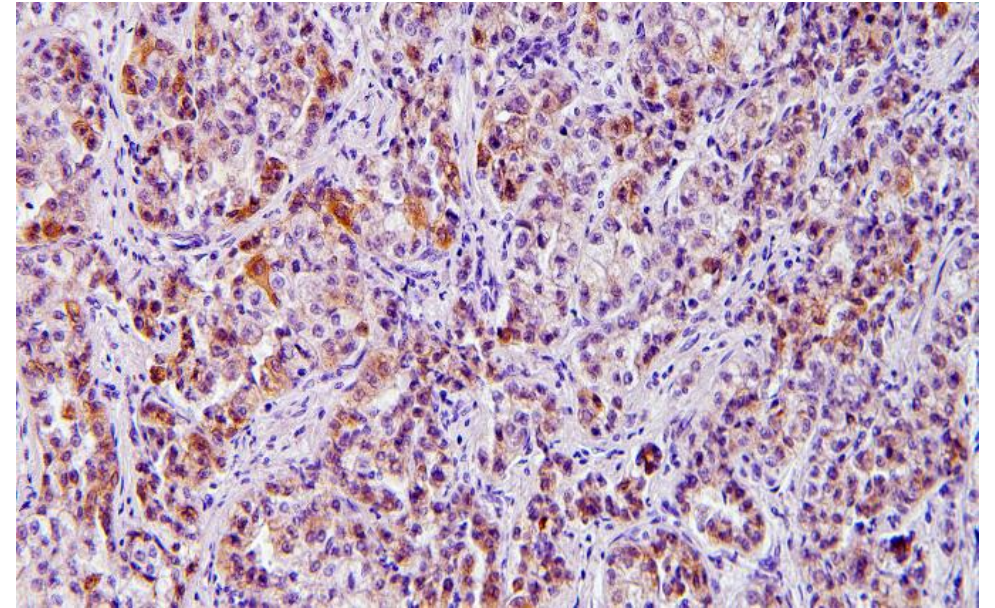

patient 15

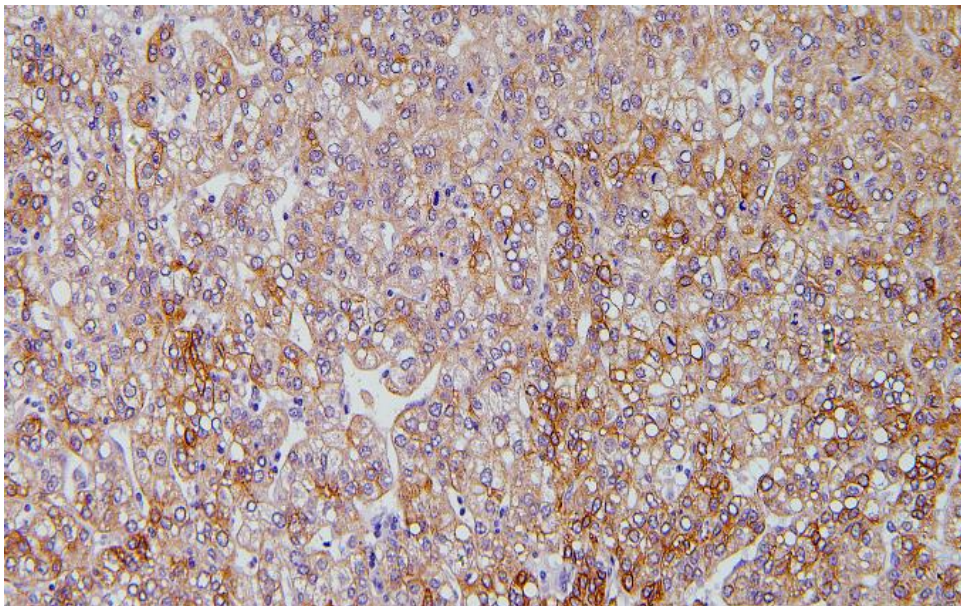

patient 16

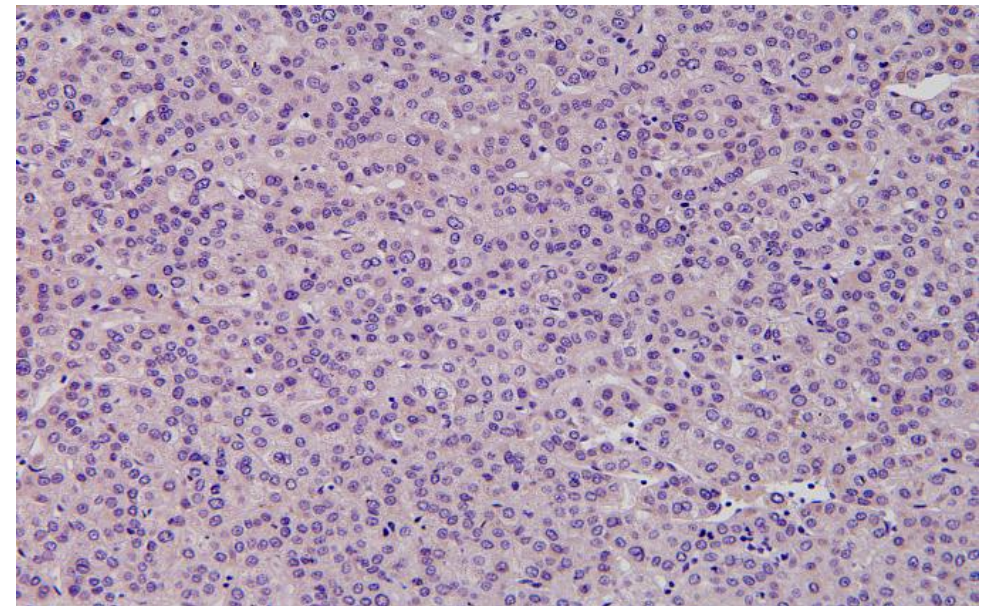

# rapid recurrence HCC patients

patient 17

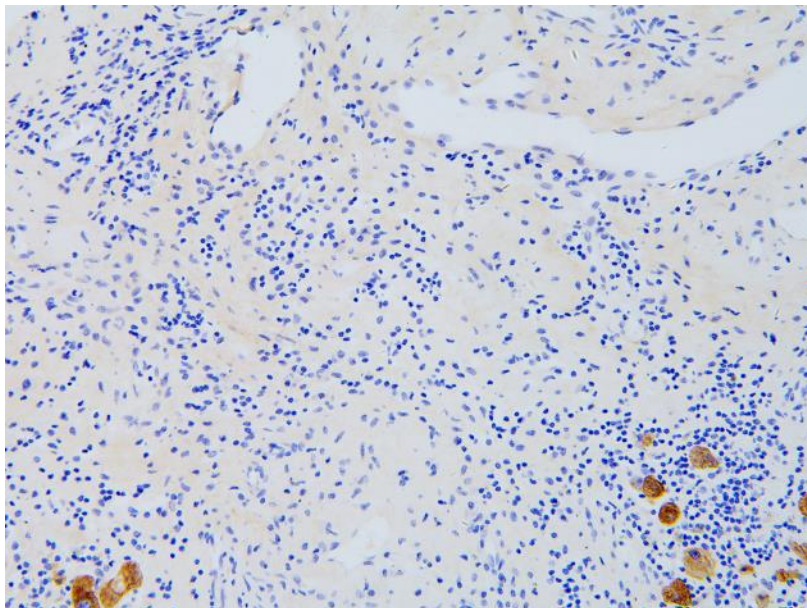

patient 18

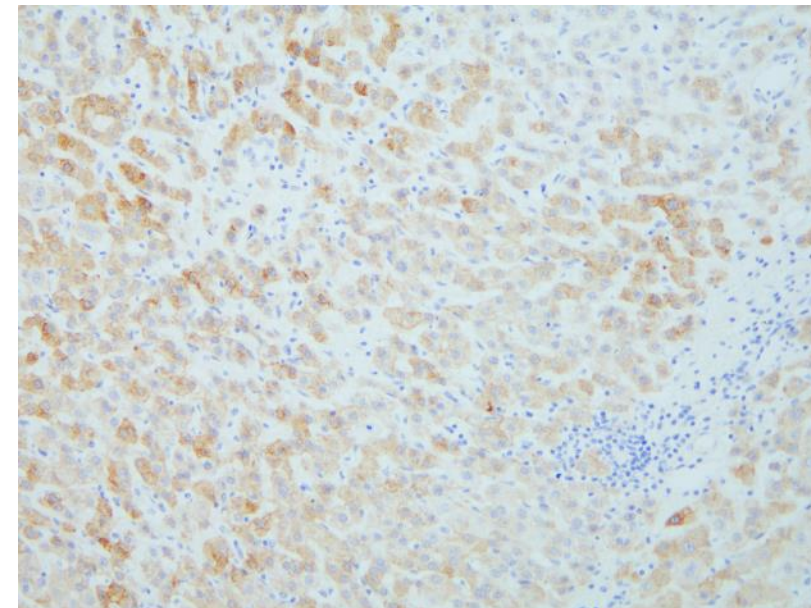

patient 19

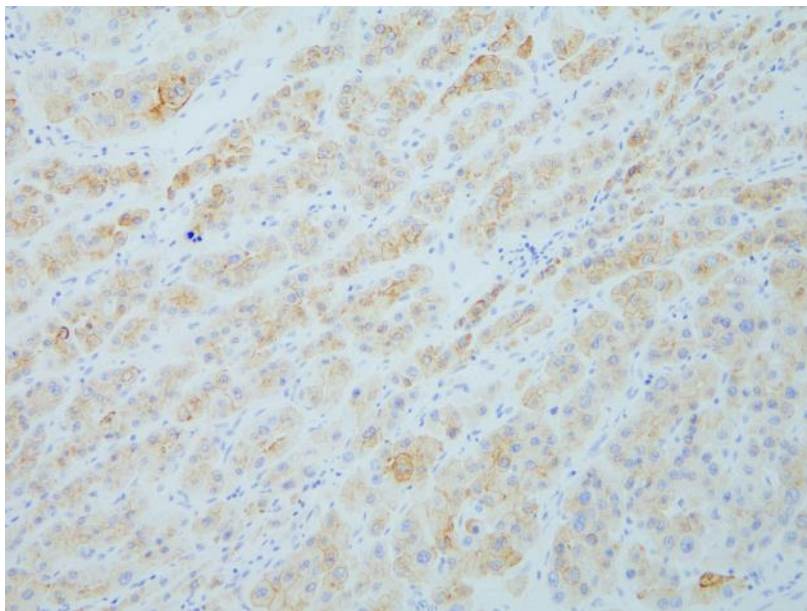

patient 20

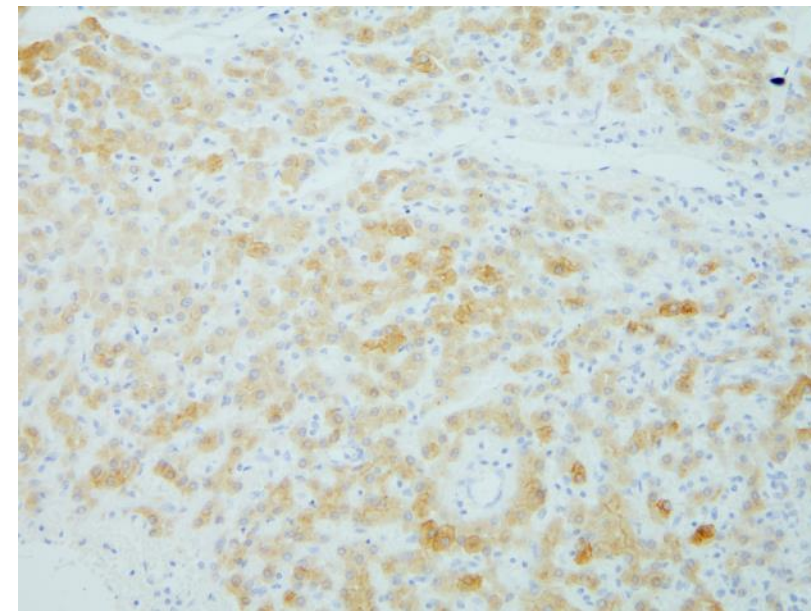

# rapid recurrence HCC patients

patient 21

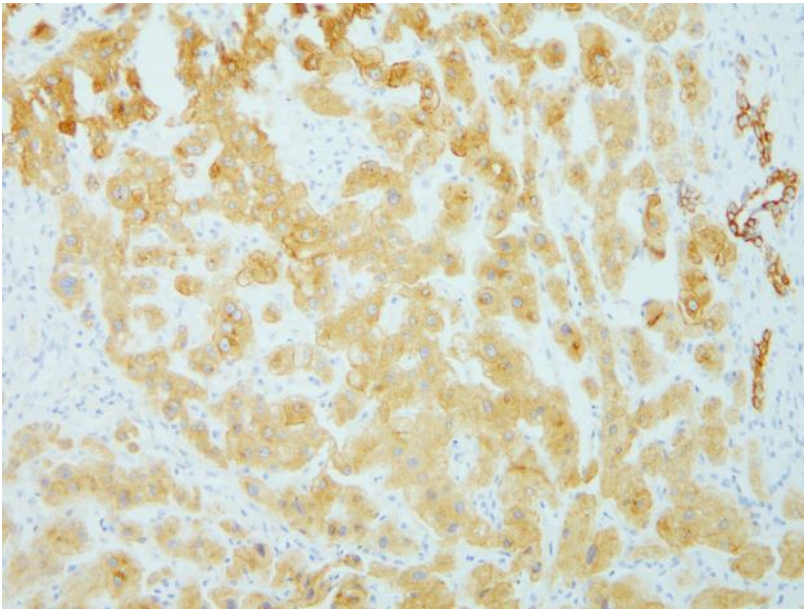

patient 22

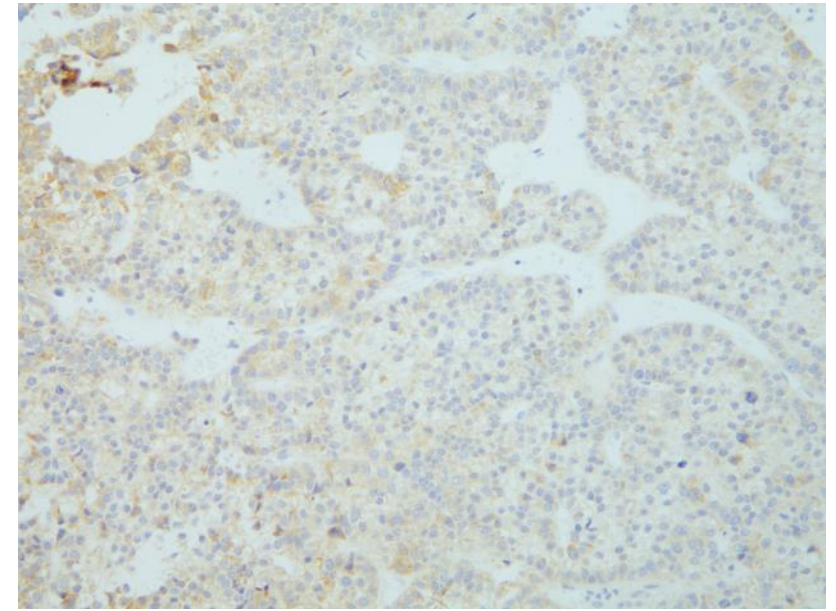

patient 23

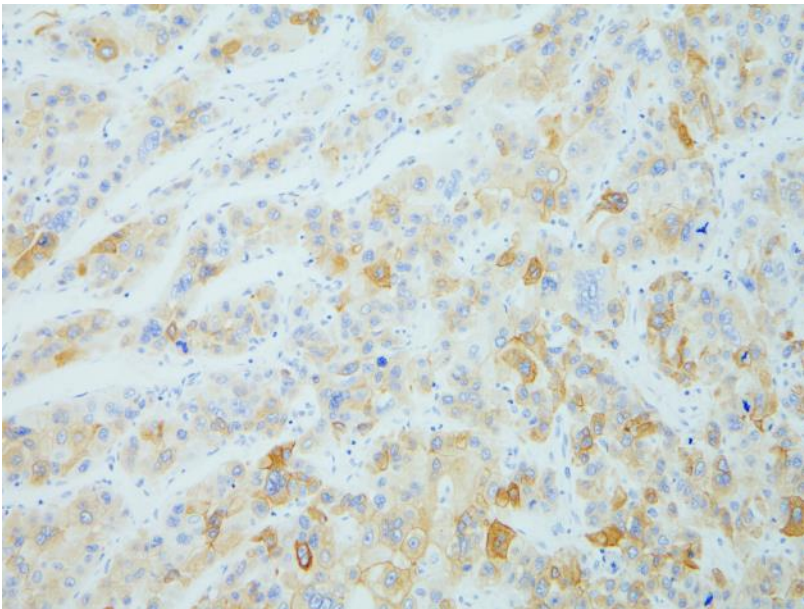

patient 24

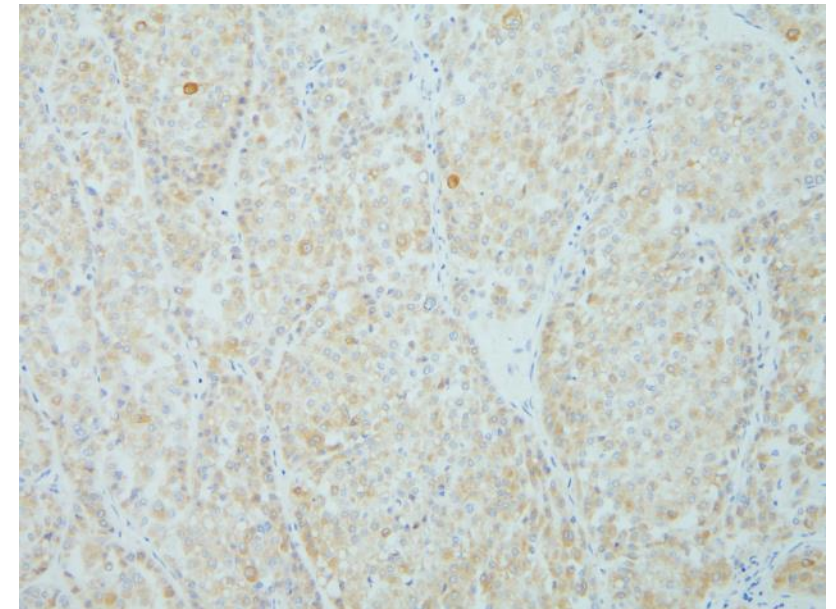

# rapid recurrence HCC patients

patient 25

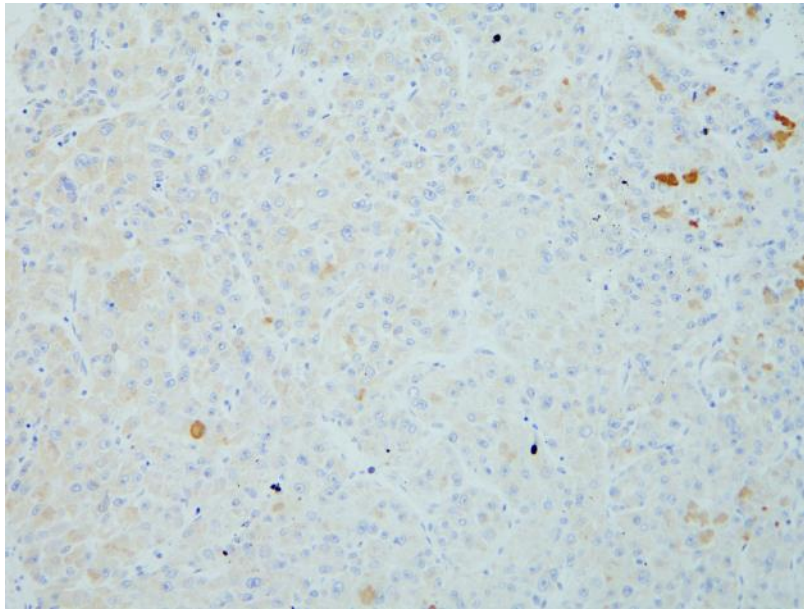

patient 26

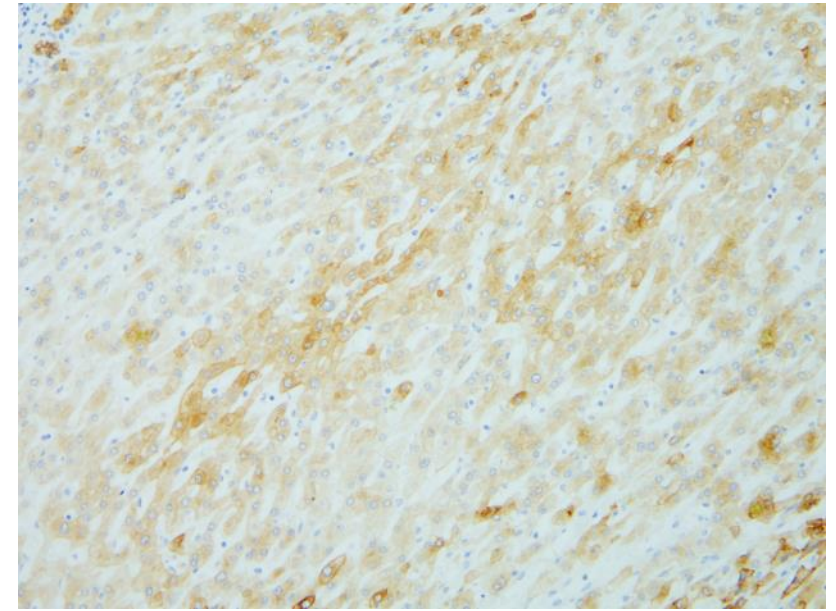

patient 27

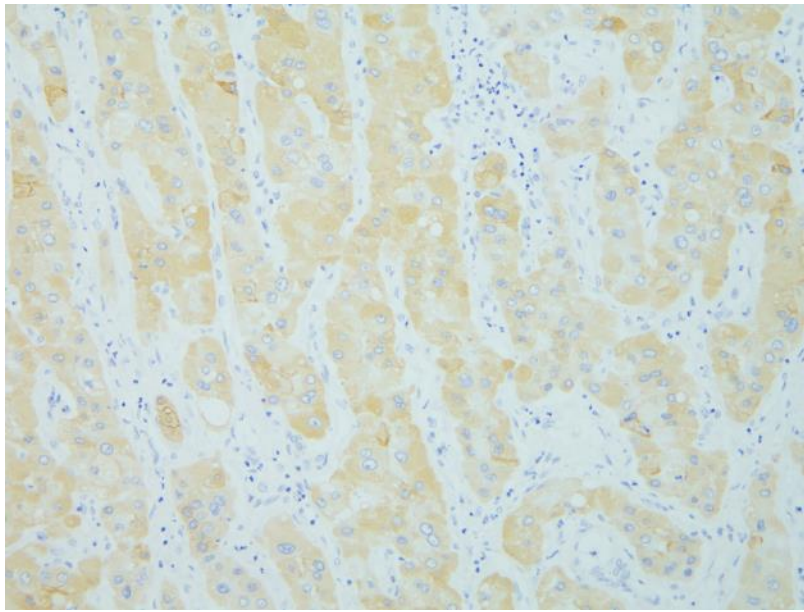

patient 28

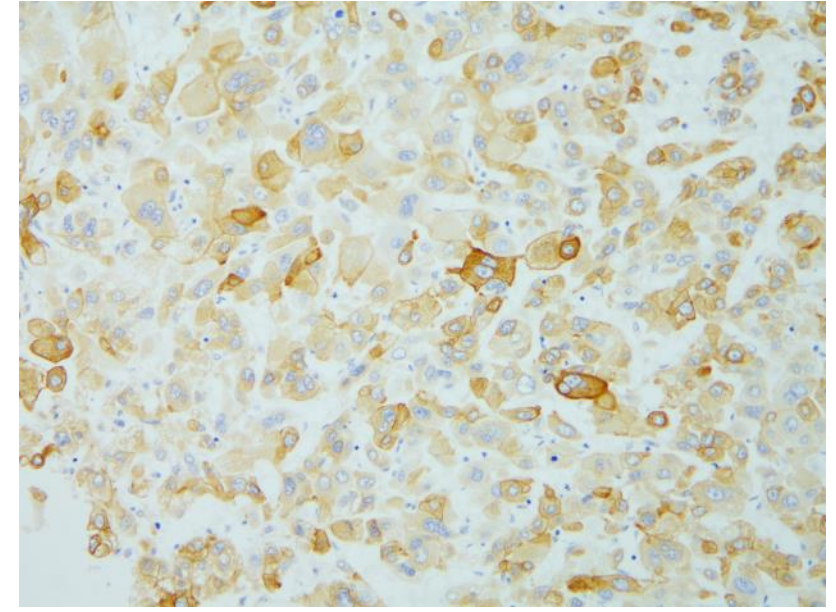

# rapid recurrence HCC patients

patient 29

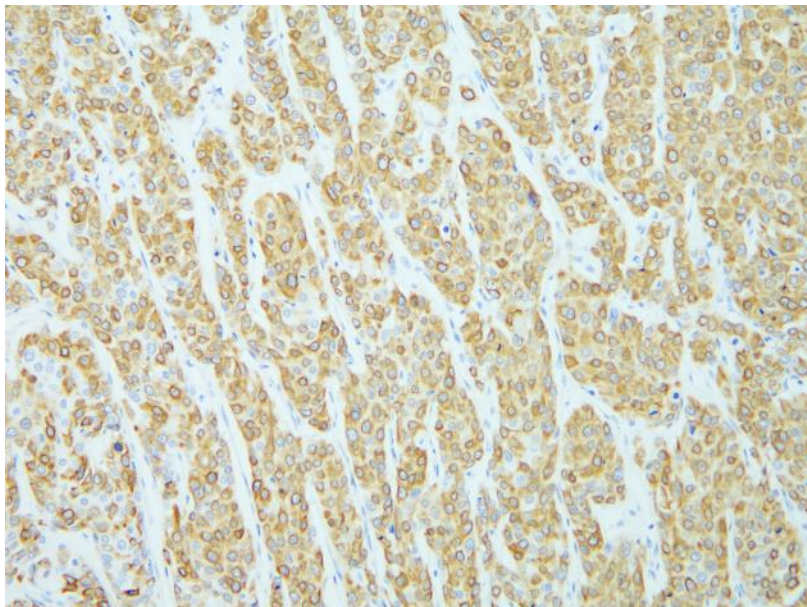

patient 30

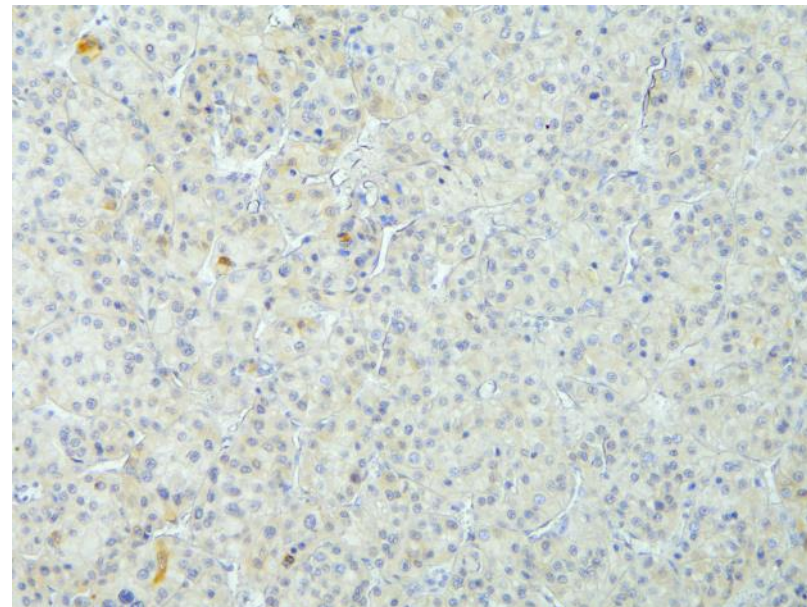

patient 31

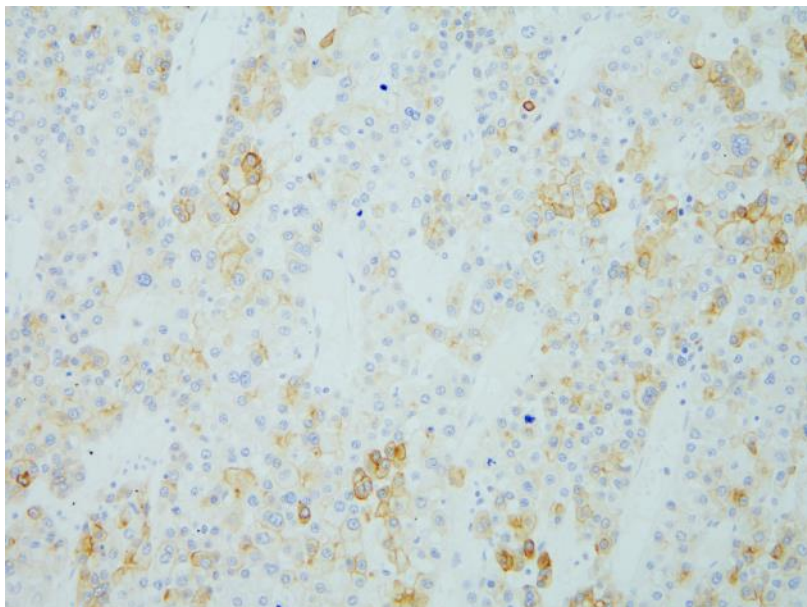

patient 32

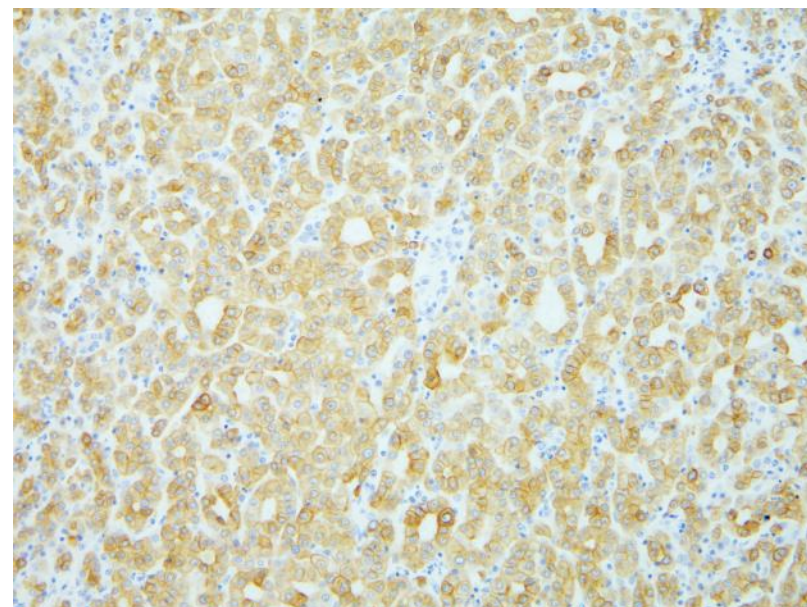

# the recurrence-free HCC patients

patient 1

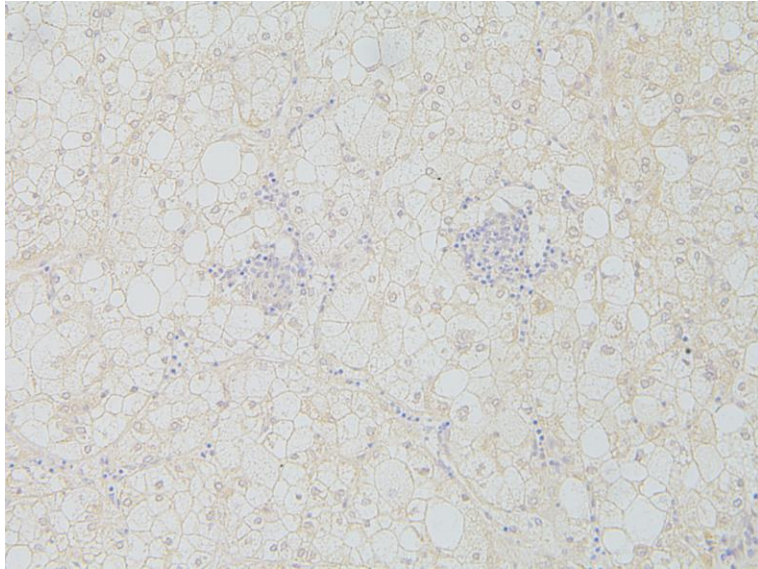

patient 2

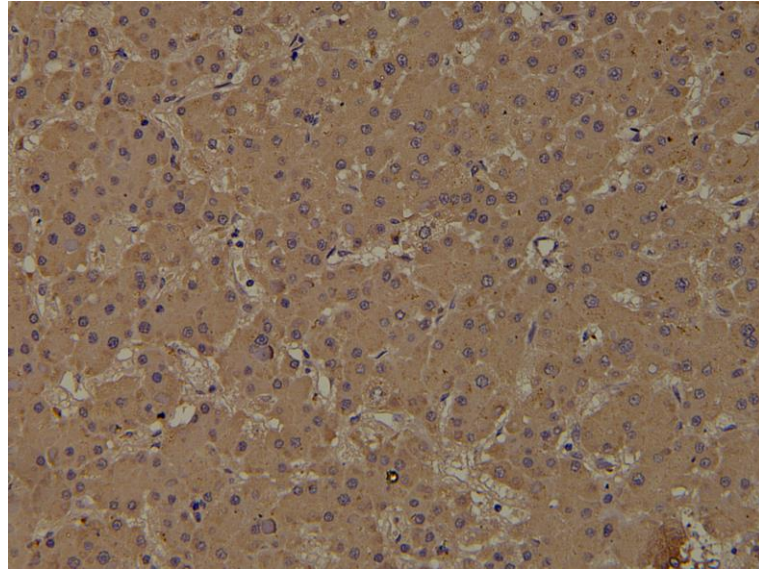

patient 3

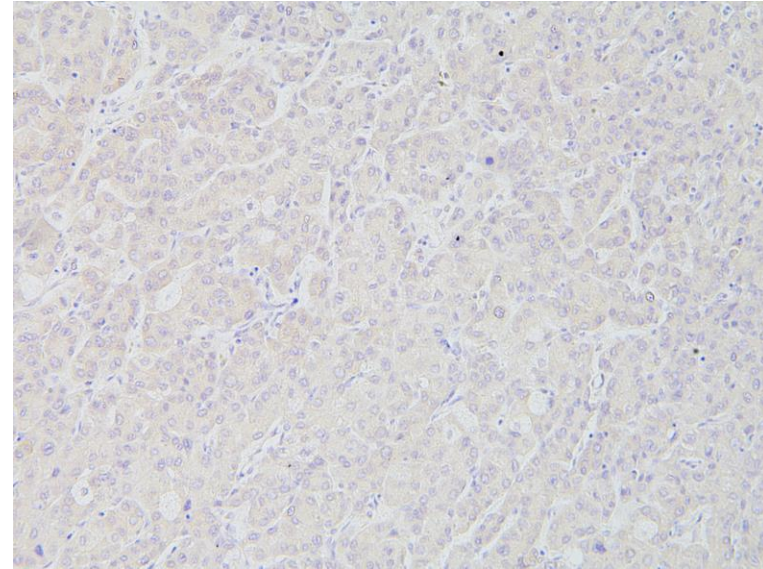

patient 4

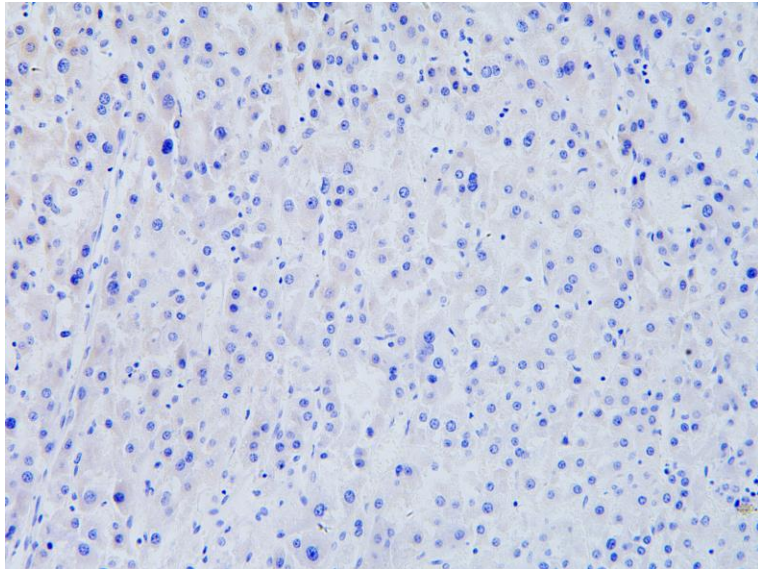

patient 5

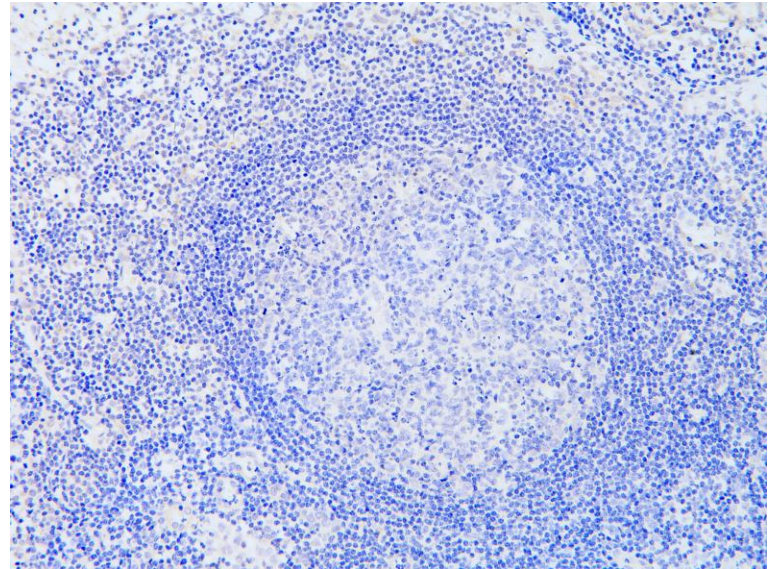

# the recurrence-free HCC patients

patient 6

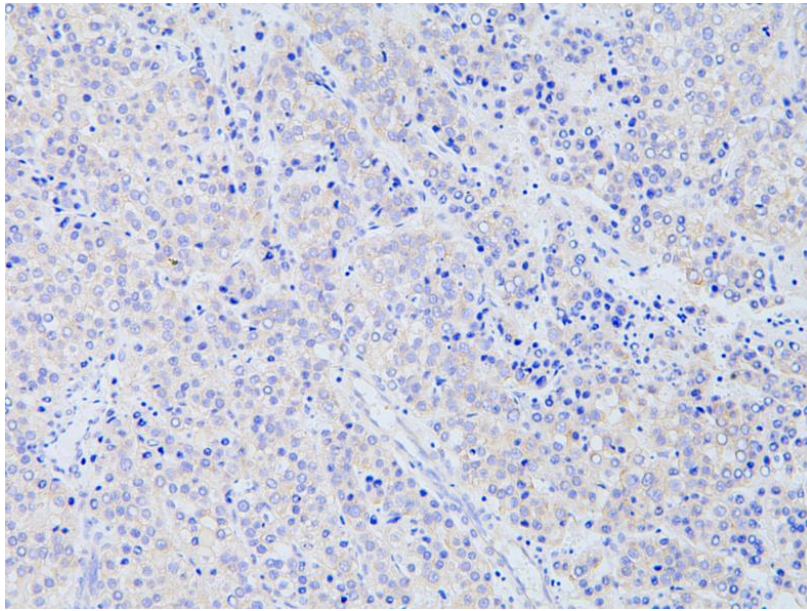

patient 7

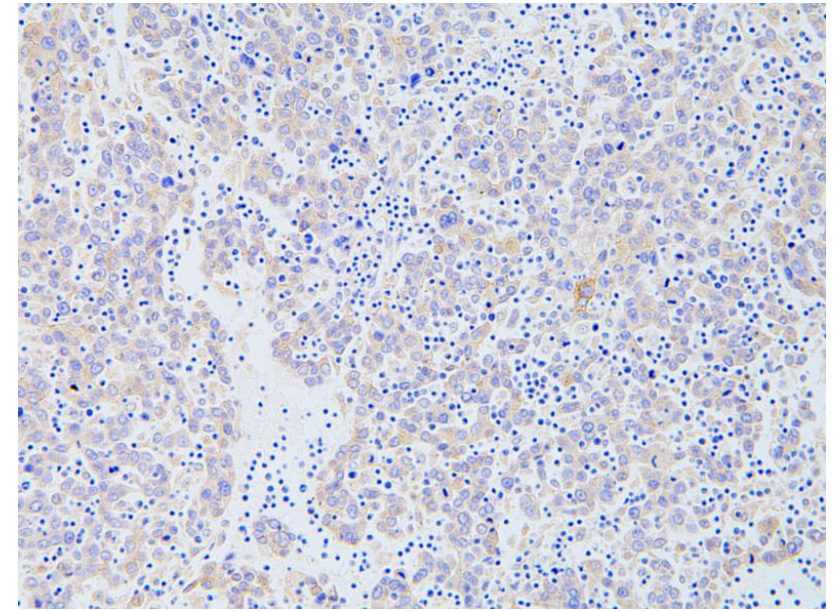

patient 8

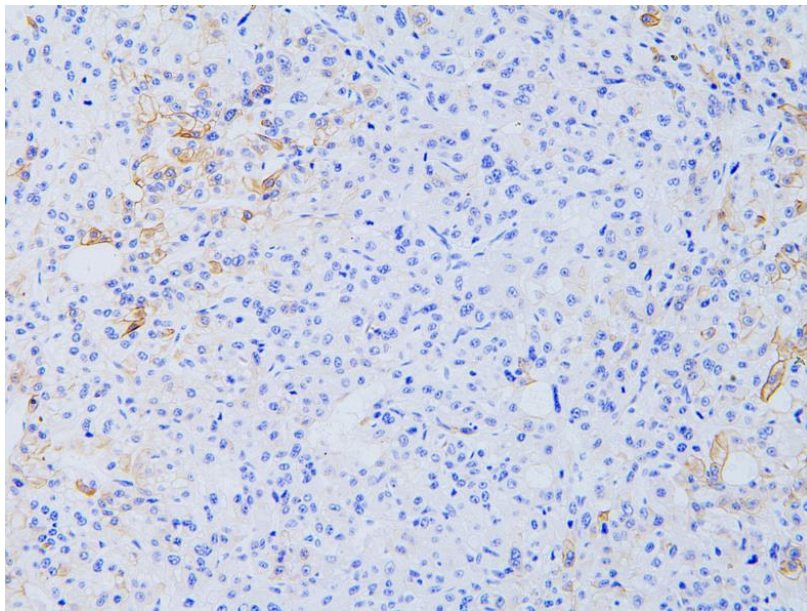

patient 9

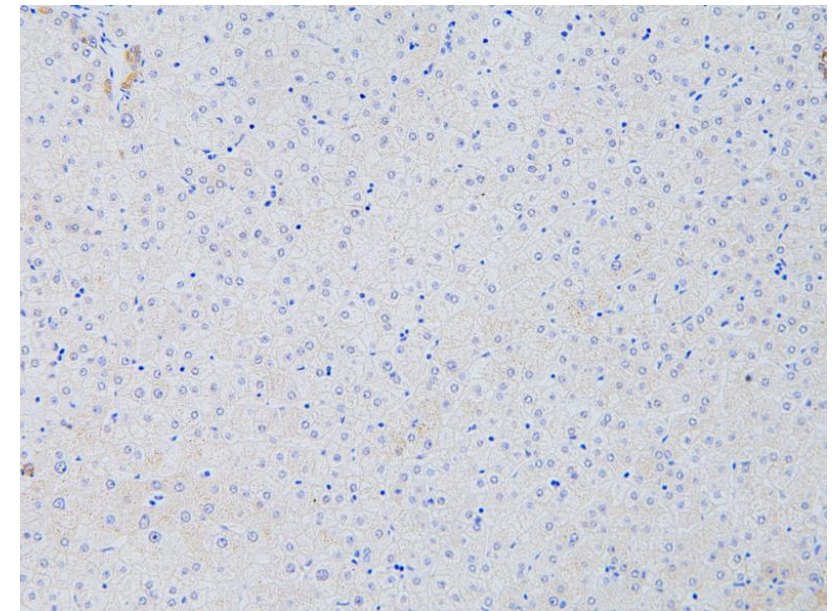



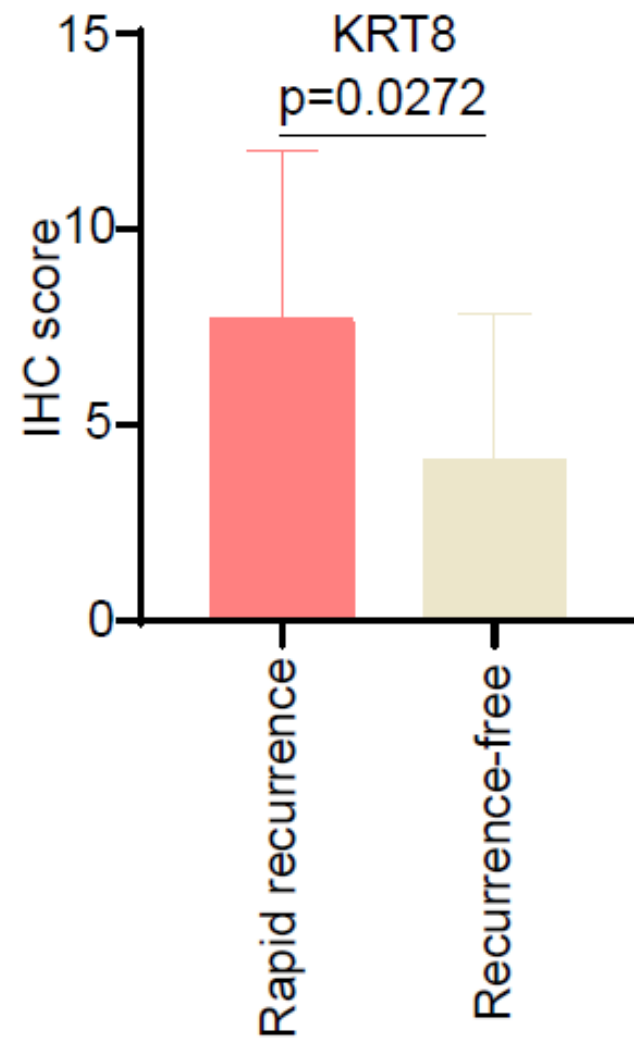

**Immunohistochemical staining showing increased KRT18 expressions in the resected tumors originated from the rapid recurrence HCC patients compared to the recurrence-free HCC patients.**

# rapid recurrence HCC patients

patient 1

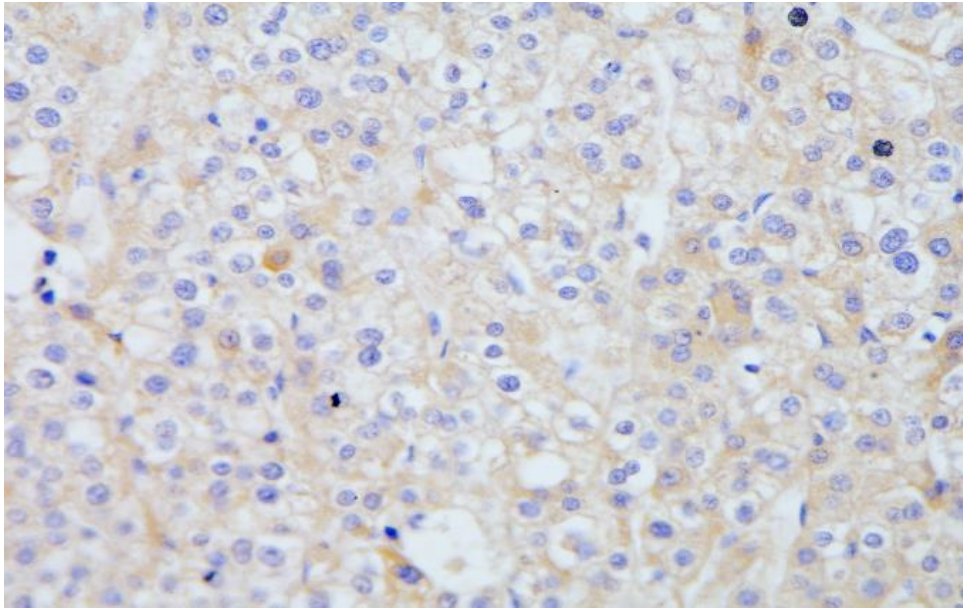

patient 2

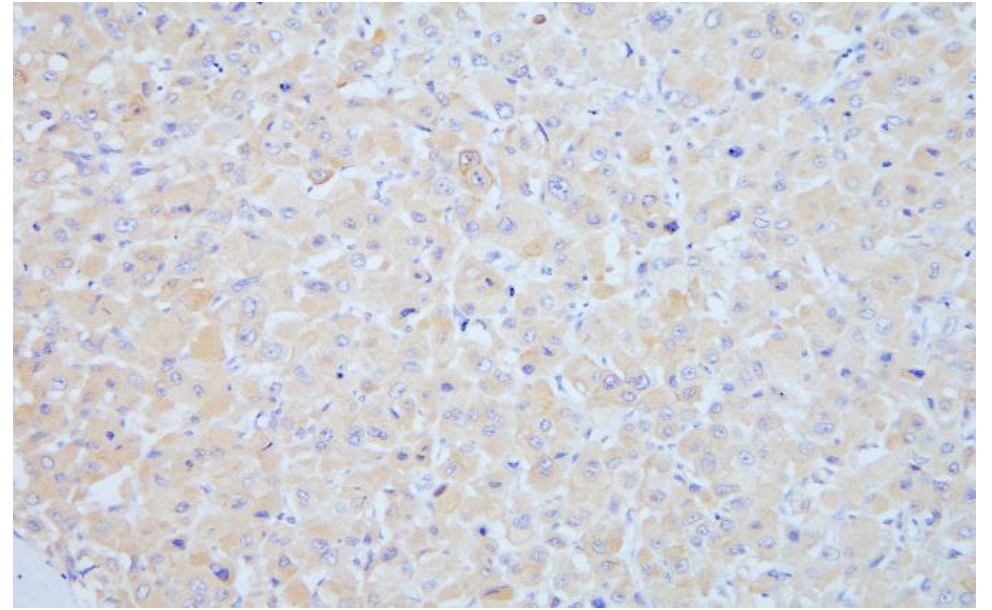

patient 3

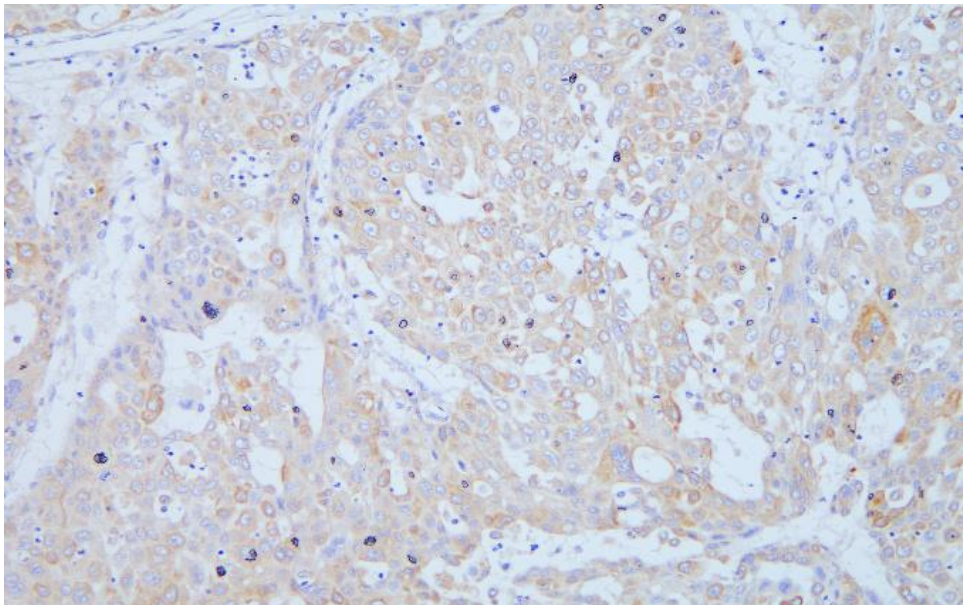

patient 4

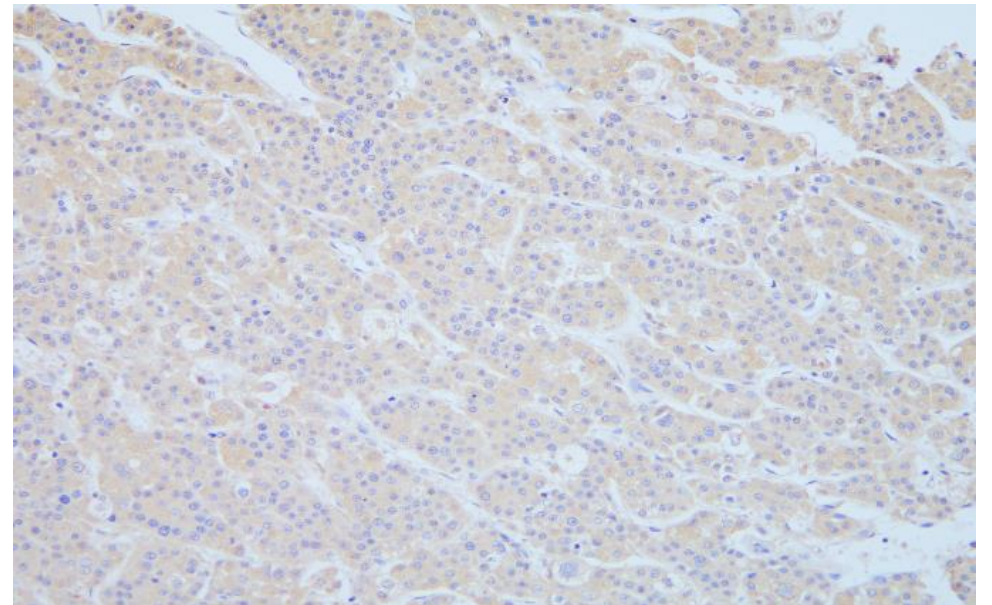

# rapid recurrence HCC patients

patient 5

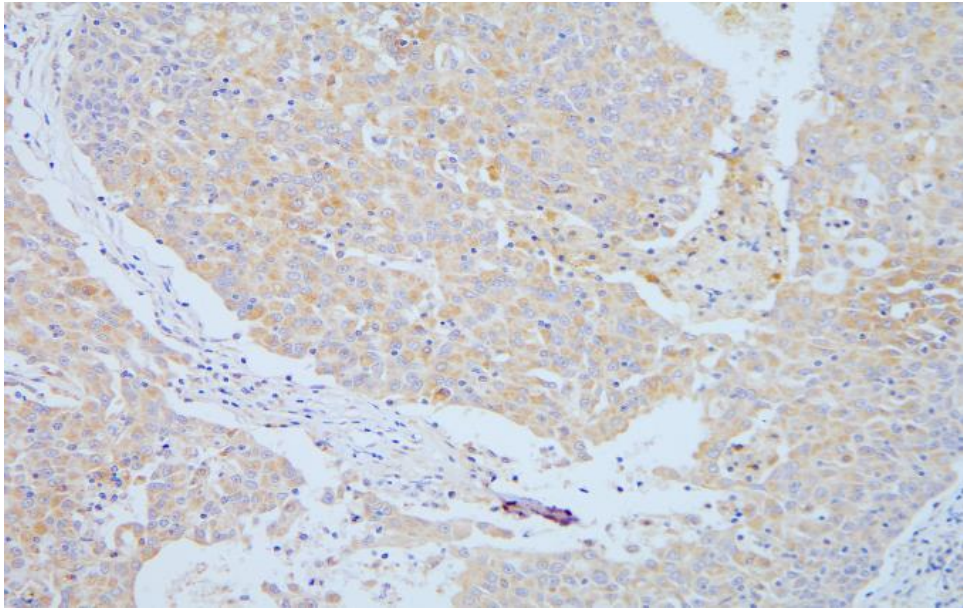

patient 6

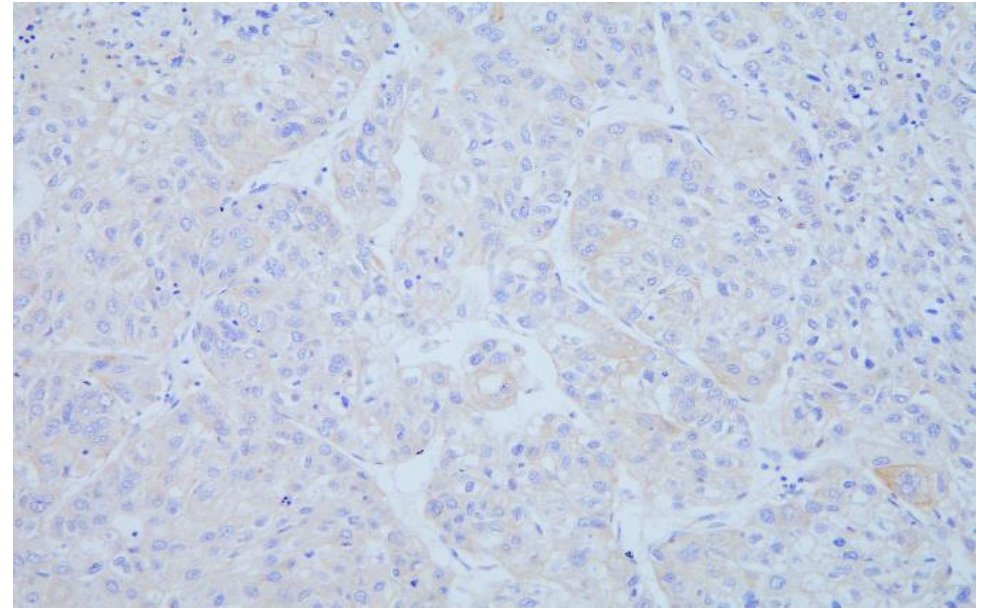

patient 7

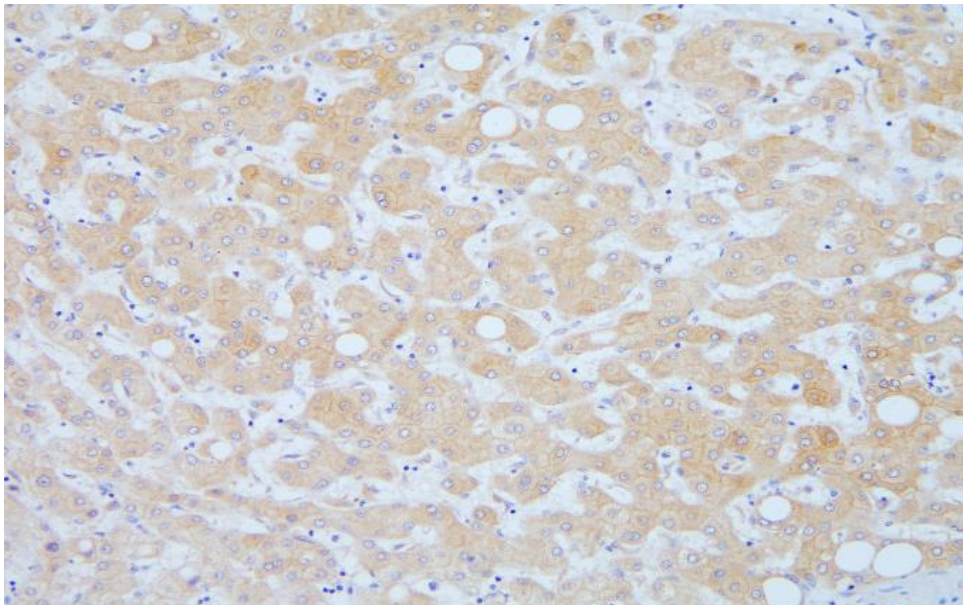

patient 8

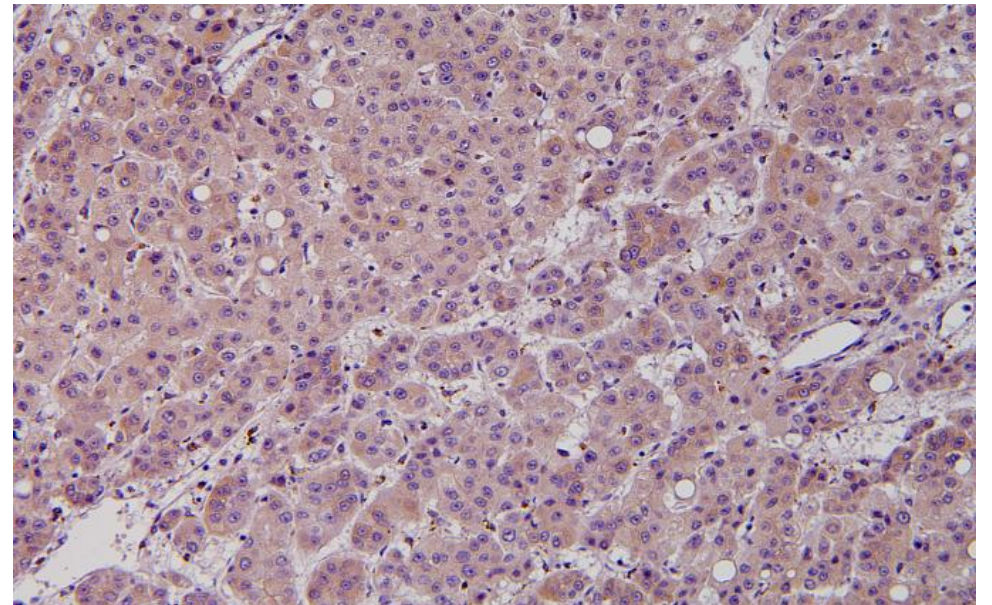

# rapid recurrence HCC patients

patient 9

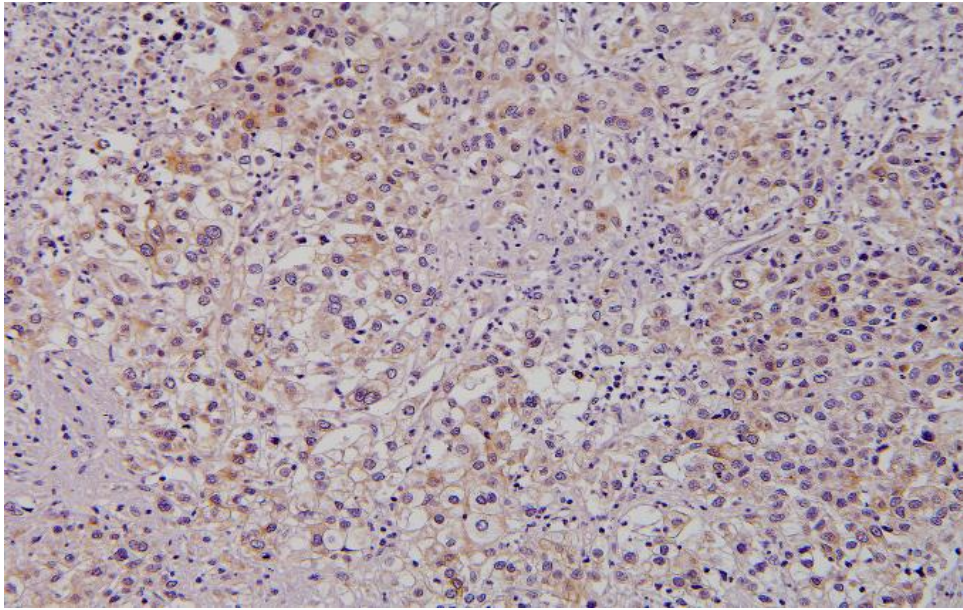

patient 10

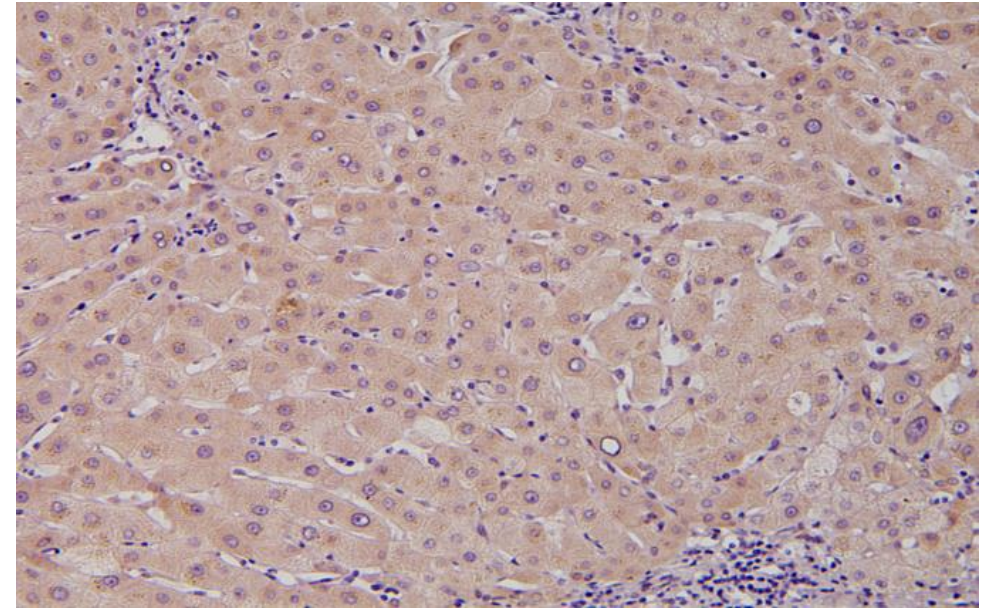

patient 11

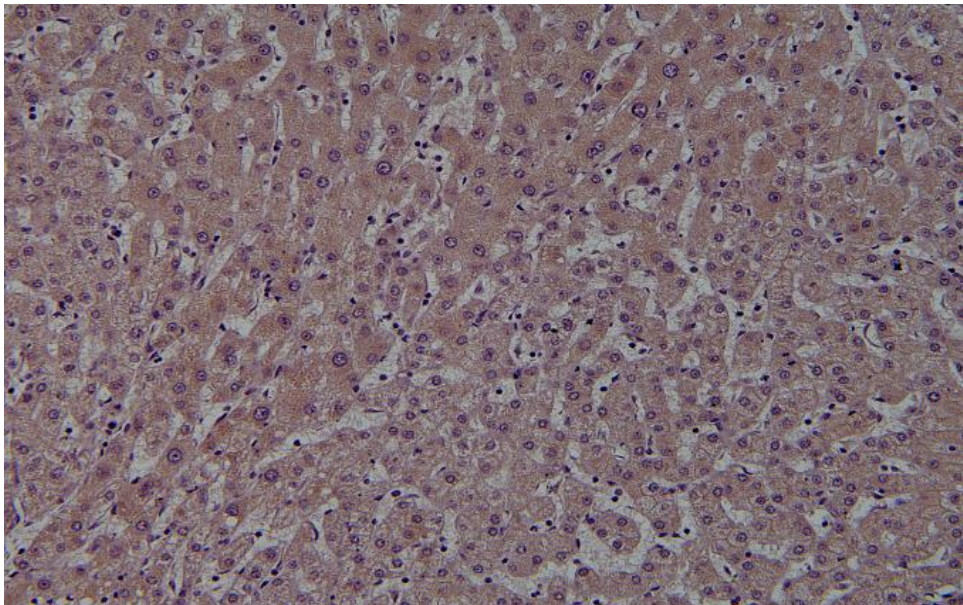

patient 12

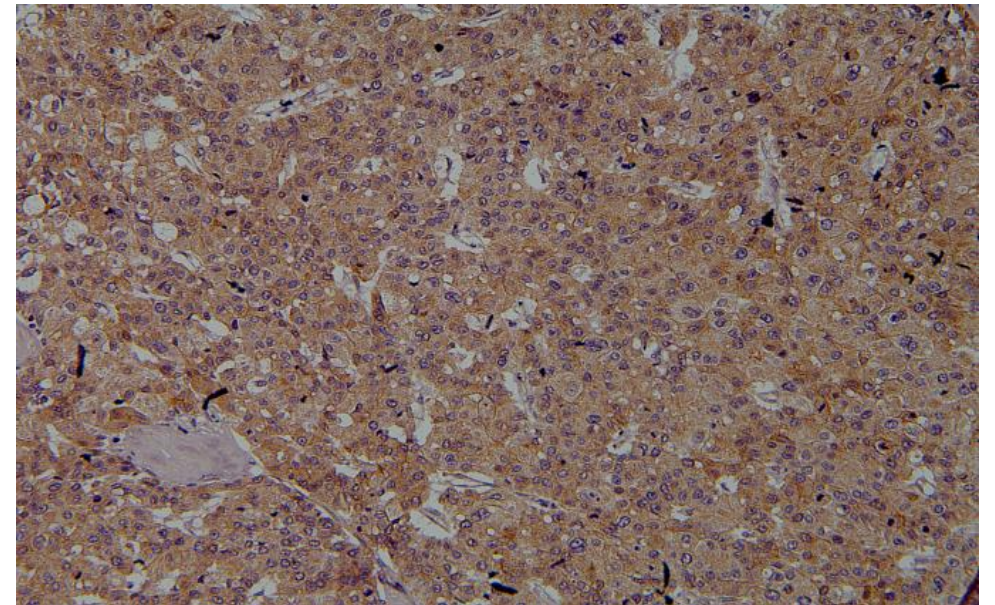

# rapid recurrence HCC patients

patient 13

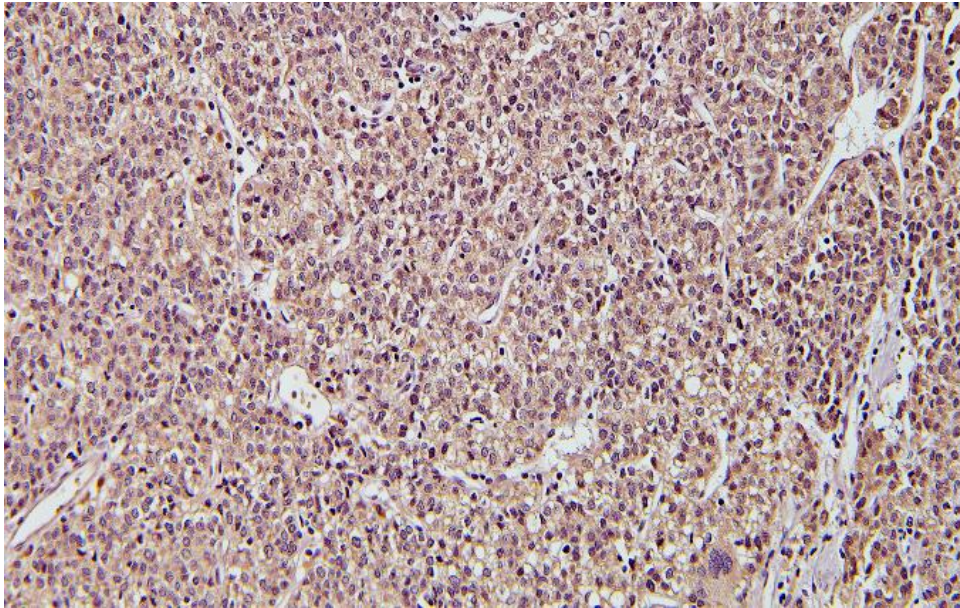

patient 14

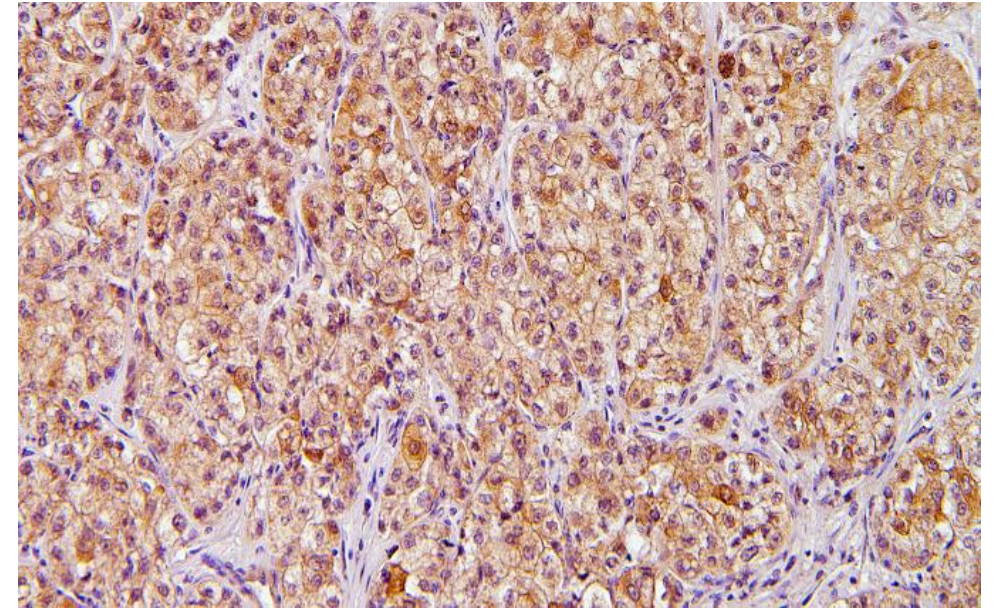

patient 15

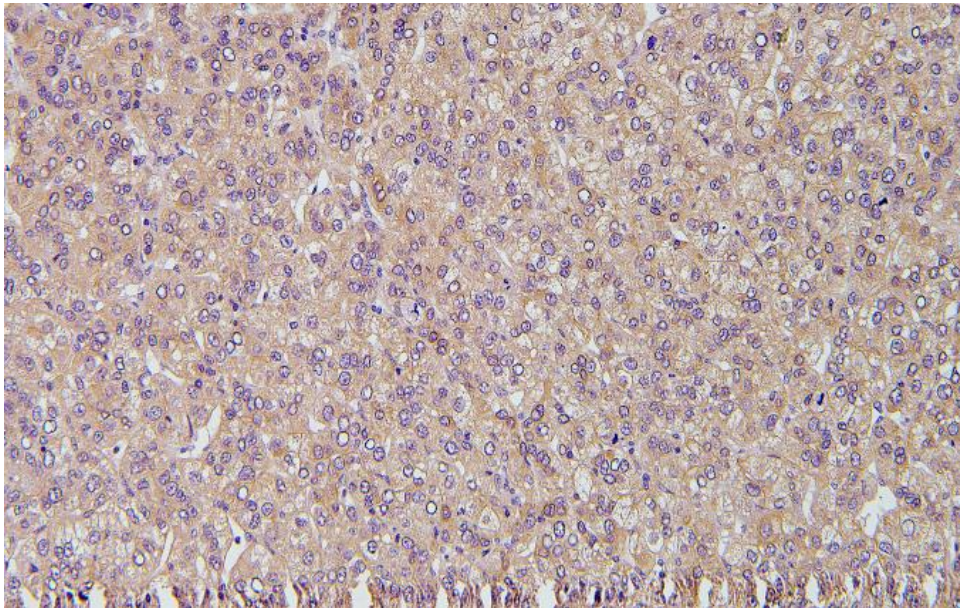

patient 16

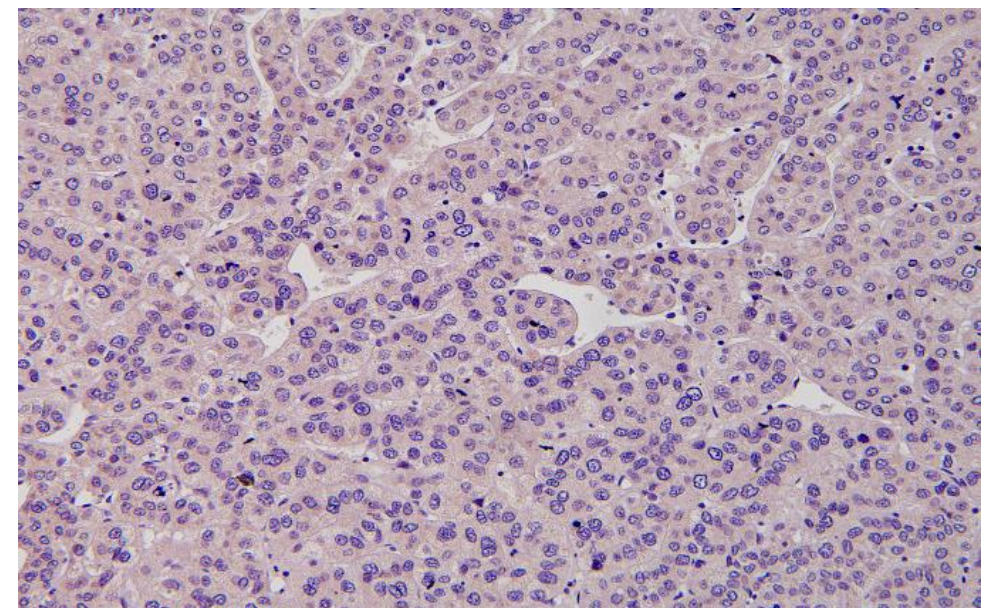

# rapid recurrence HCC patients

patient 17

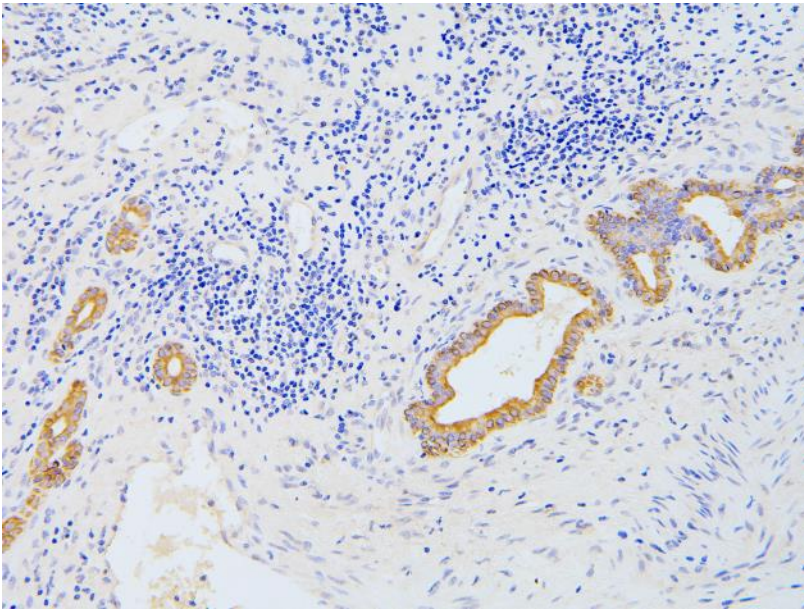

patient 18

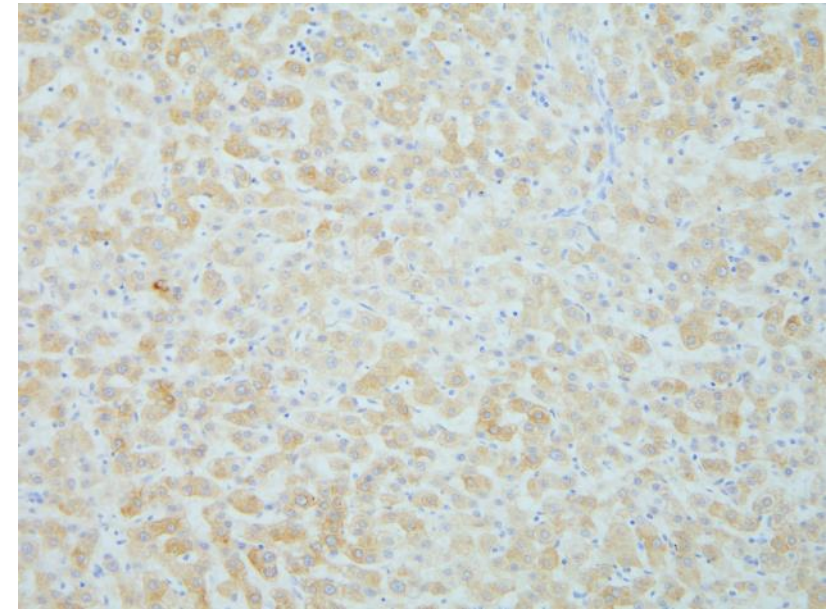

patient 19

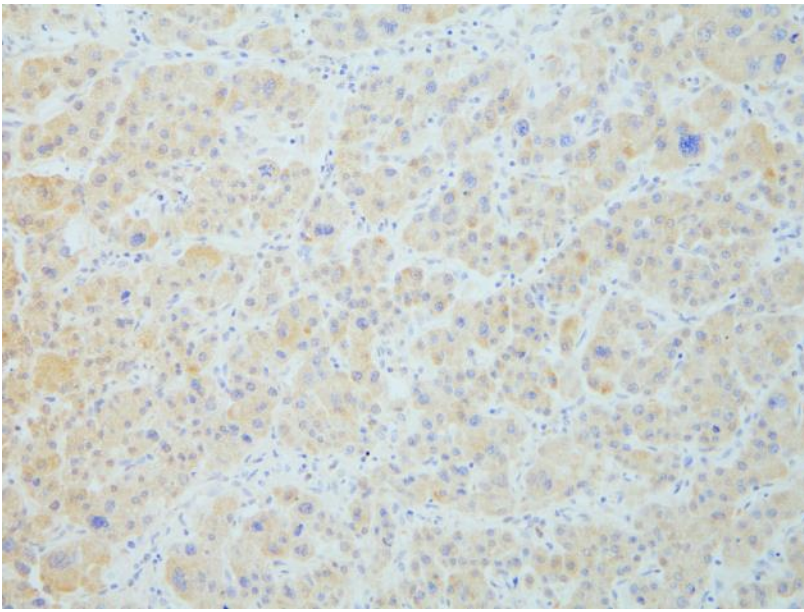

patient 20

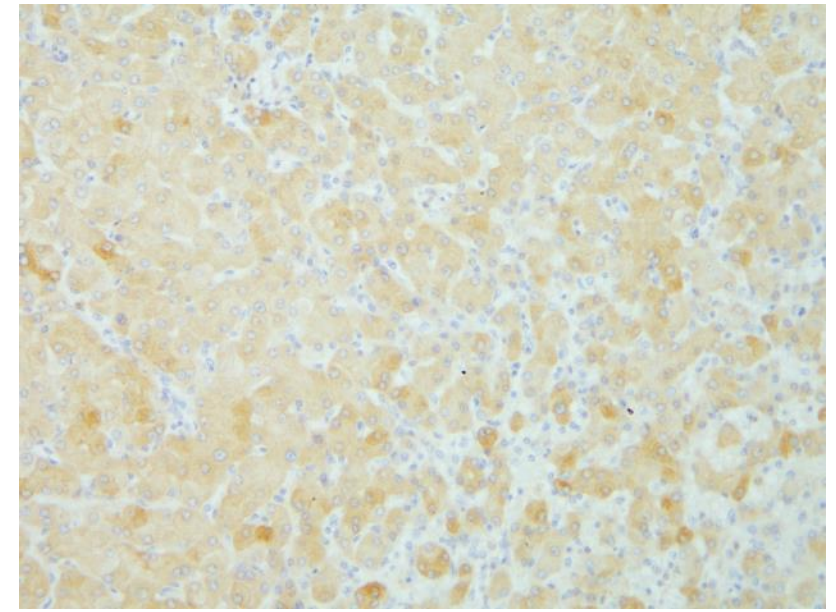

# rapid recurrence HCC patients

patient 21

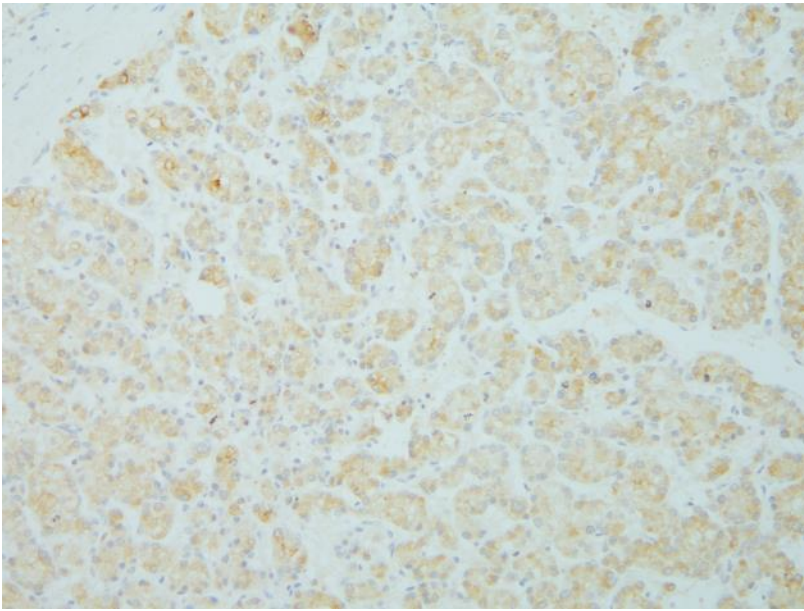

patient 22

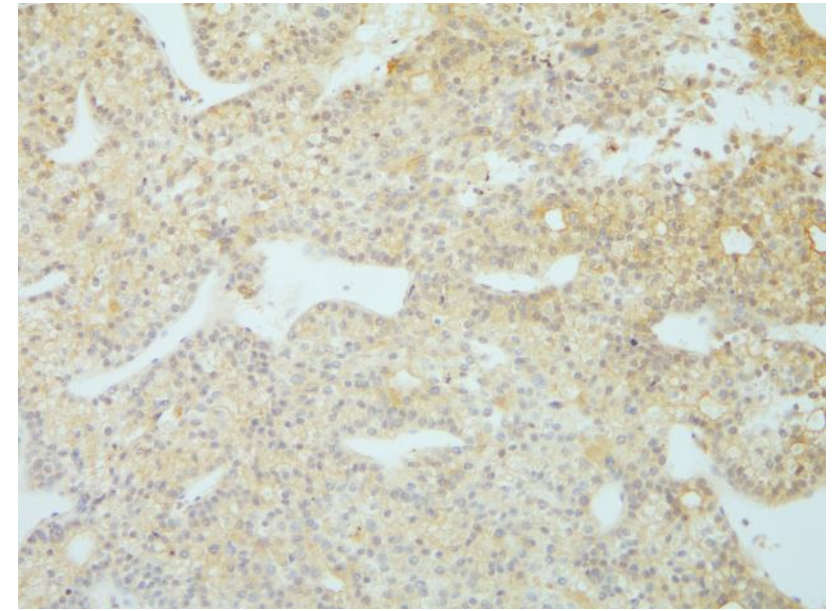

patient 23

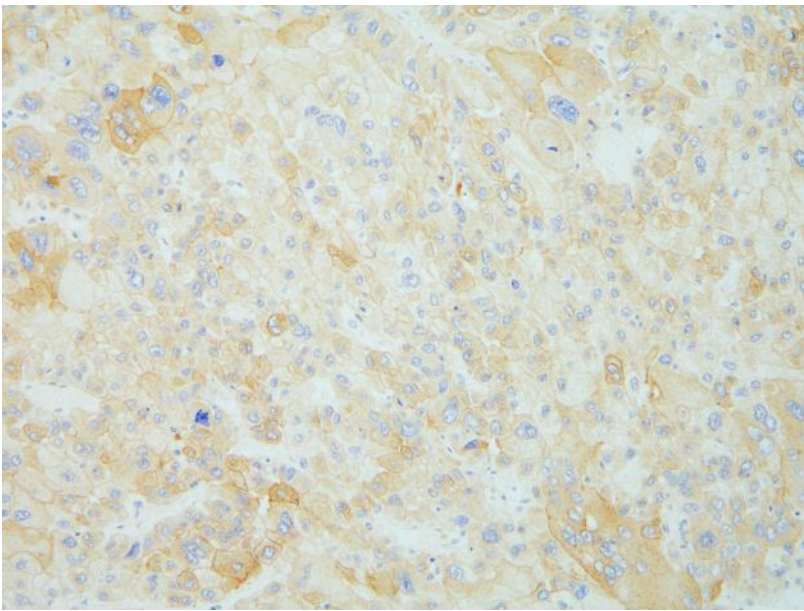

patient 24

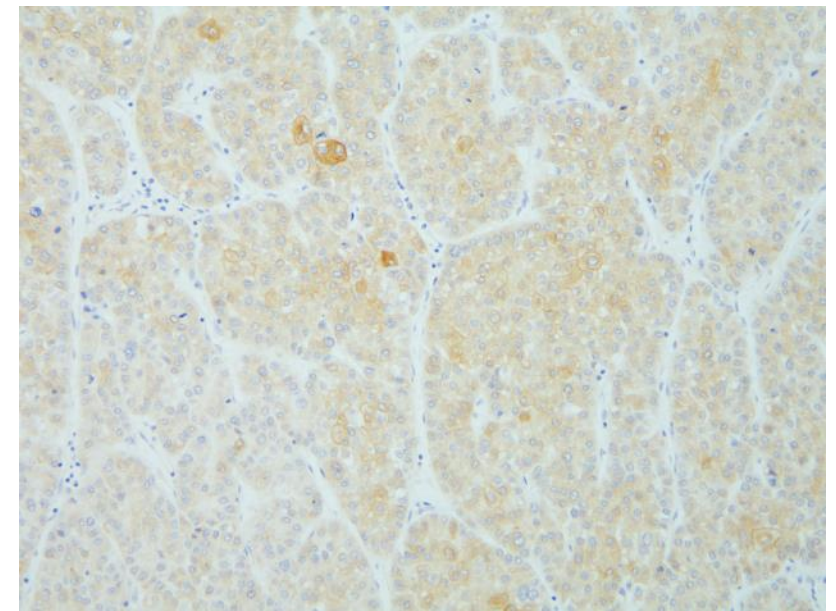



# rapid recurrence HCC patients

patient 25

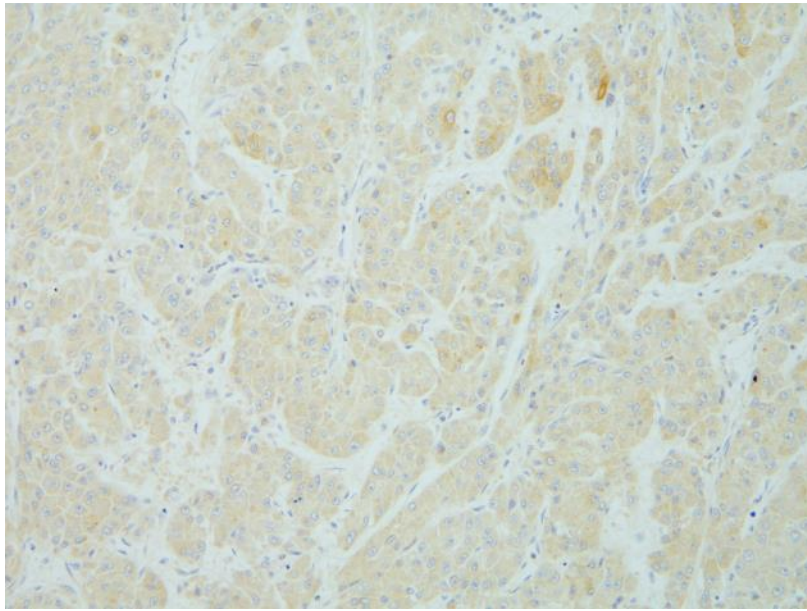

patient 26

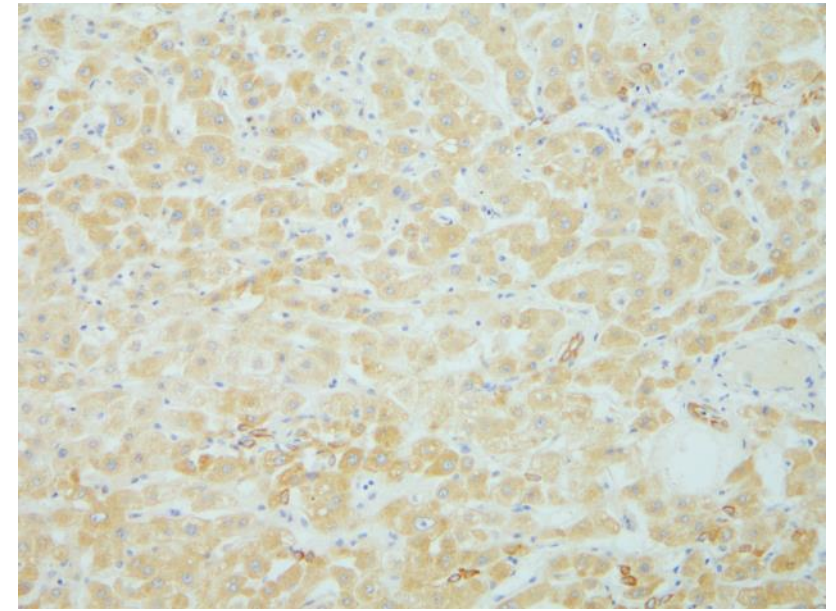

patient 27

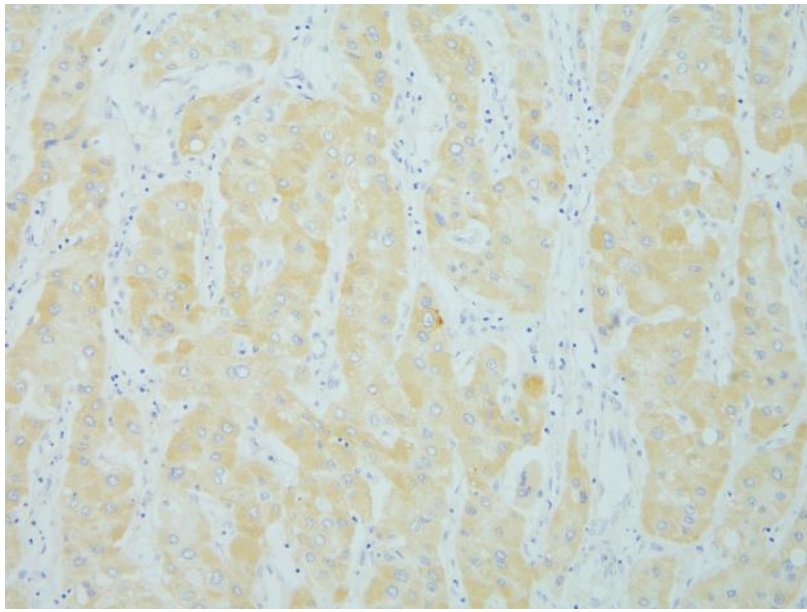

patient 28

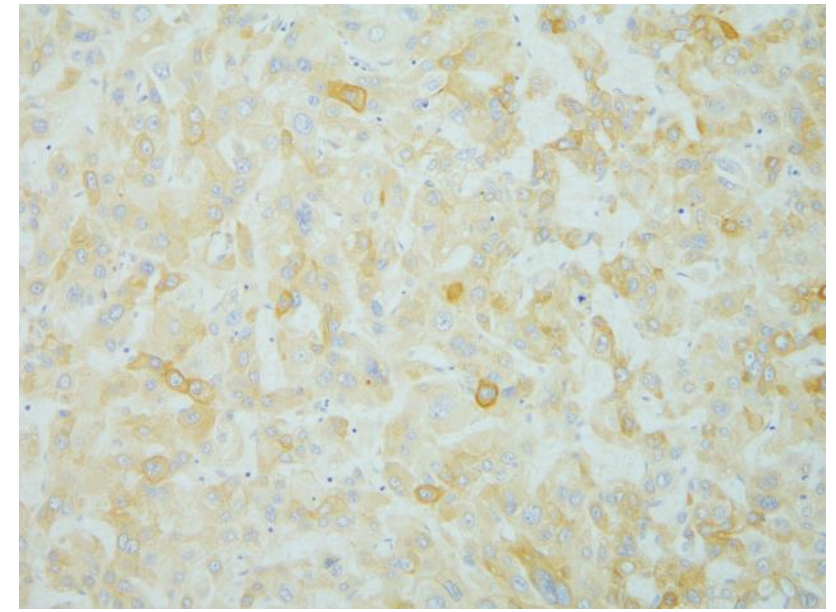

# rapid recurrence HCC patients

patient 29

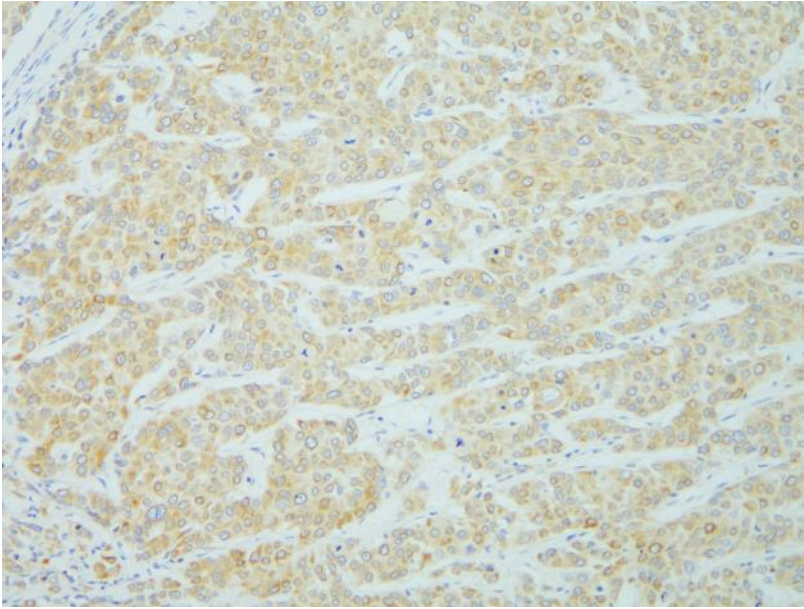

patient 30

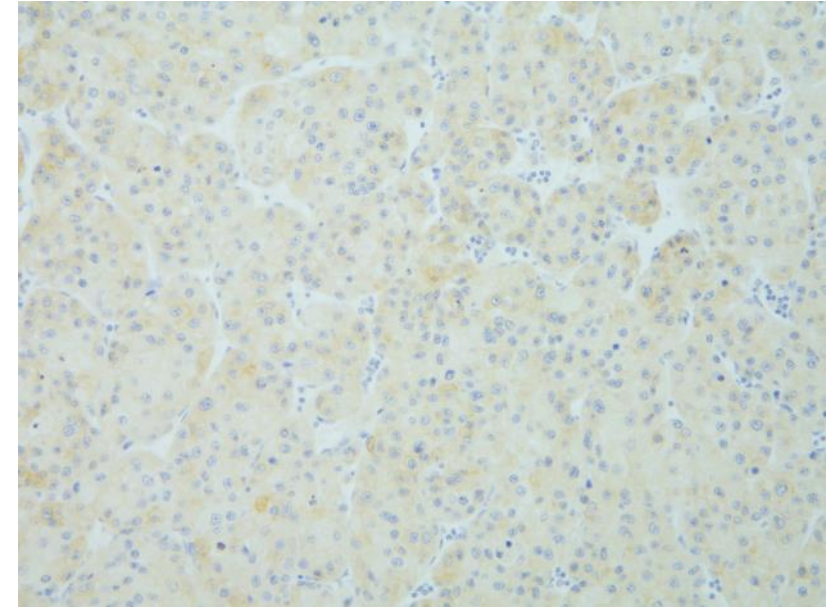

patient 31

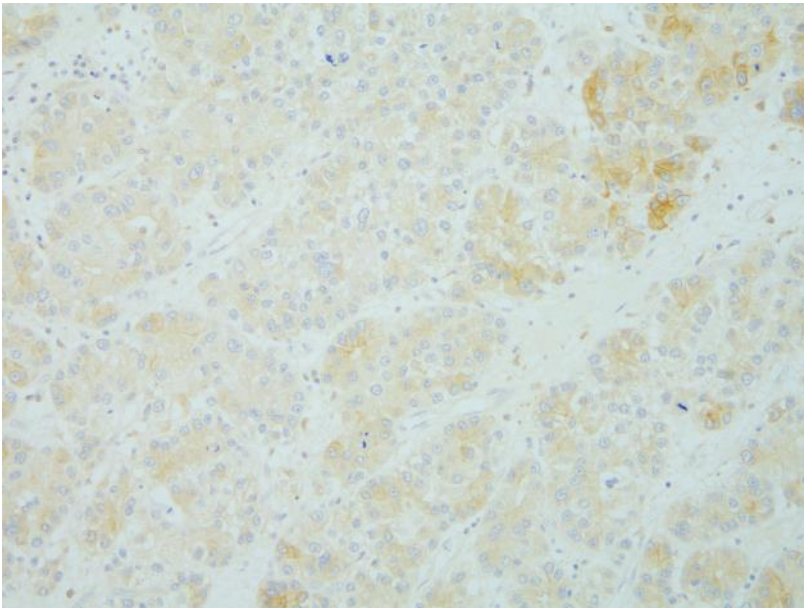

patient 32

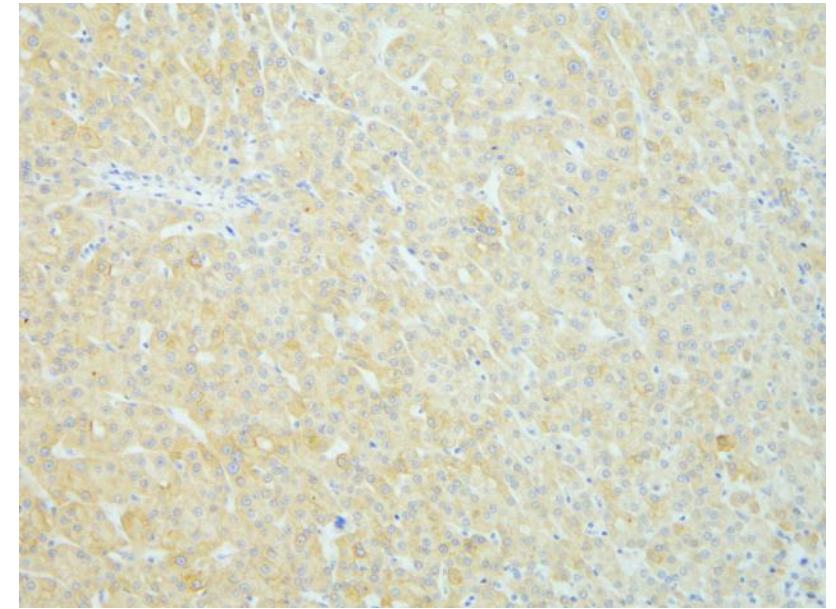

# the recurrence-free HCC patients

patient 1

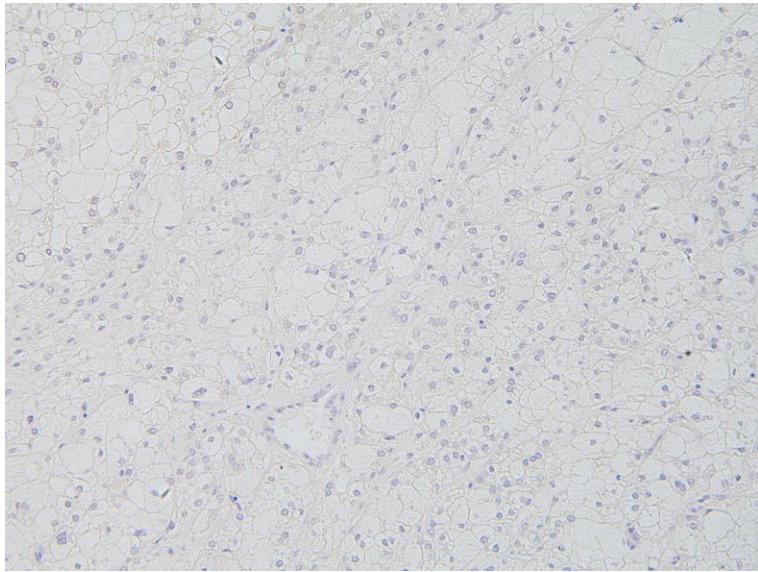

patient 2

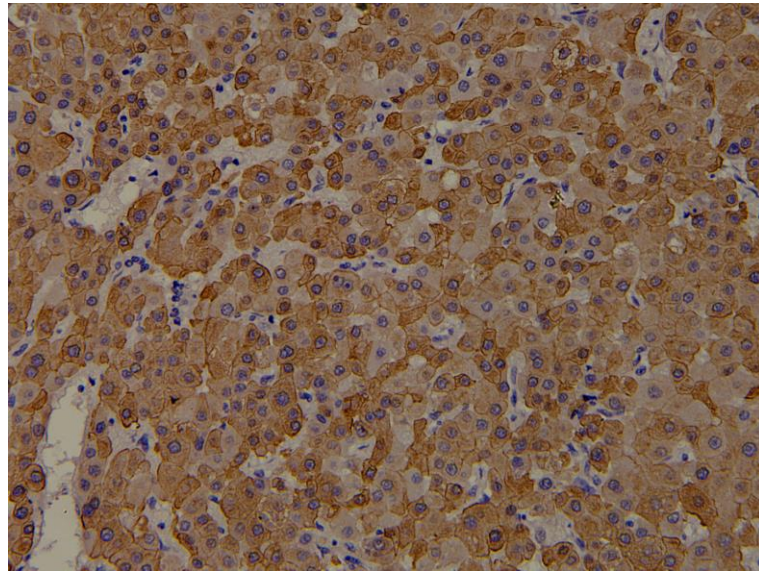

patient 3

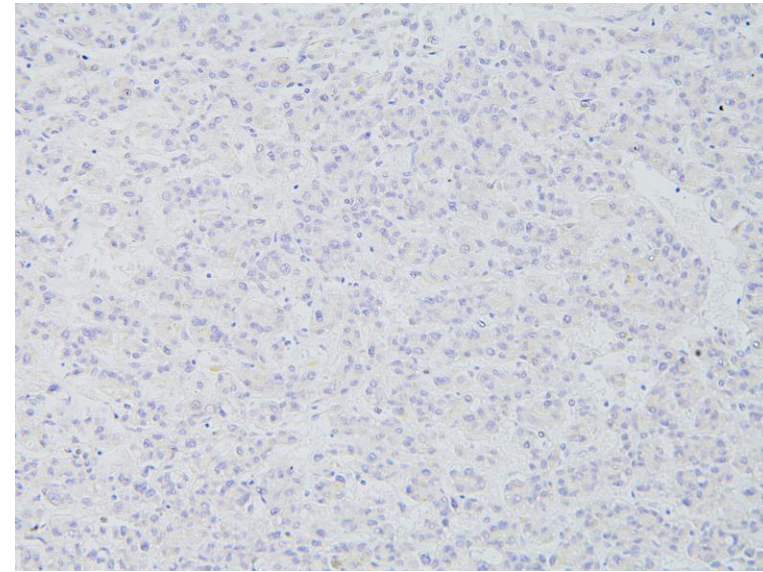

patient 4

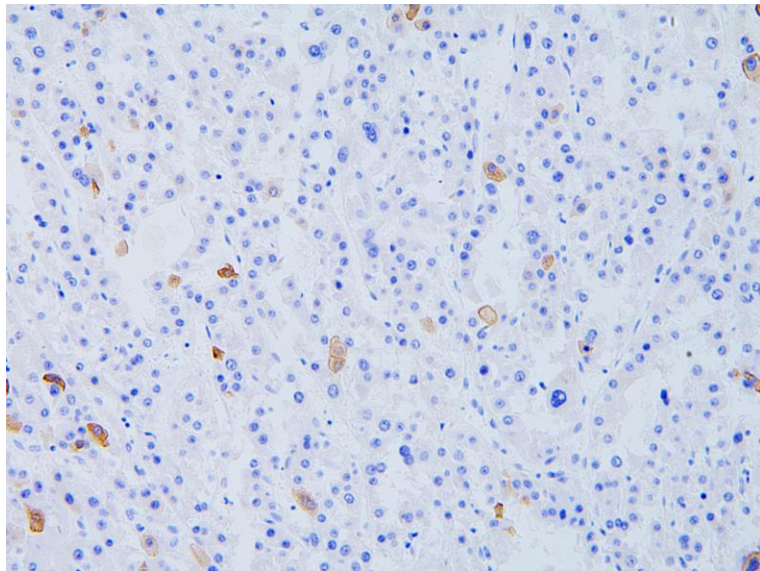

patient 5

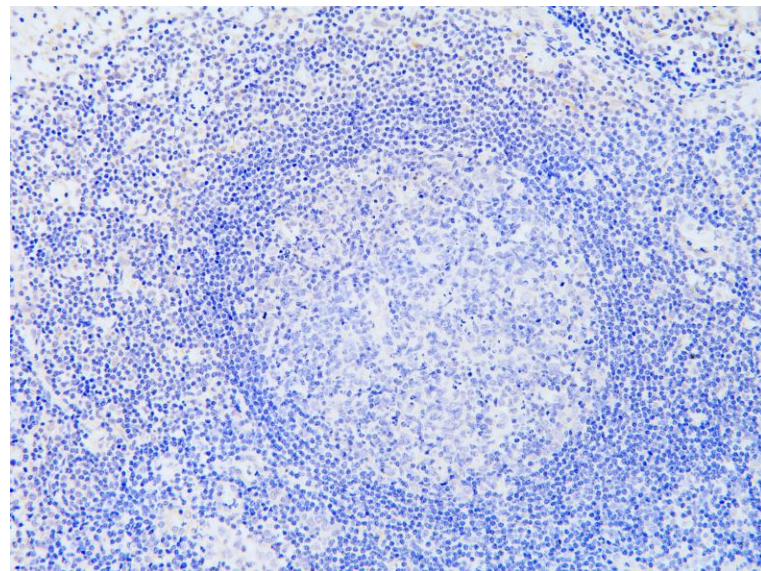

# the recurrence-free HCC patients

patient 6

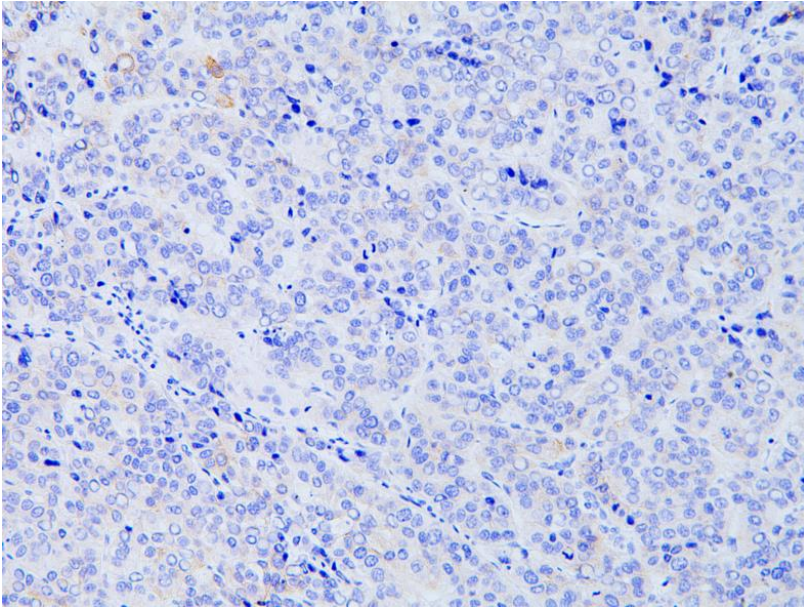

patient 7

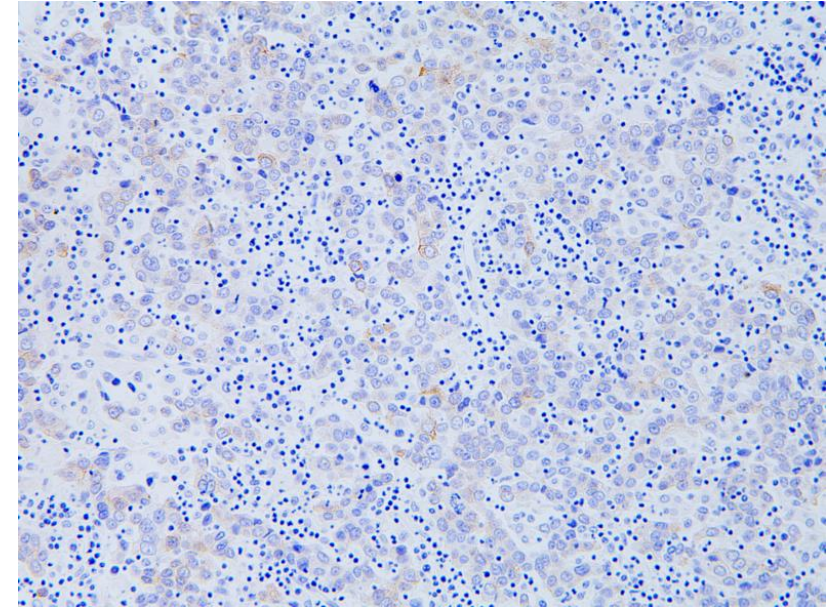

patient 8

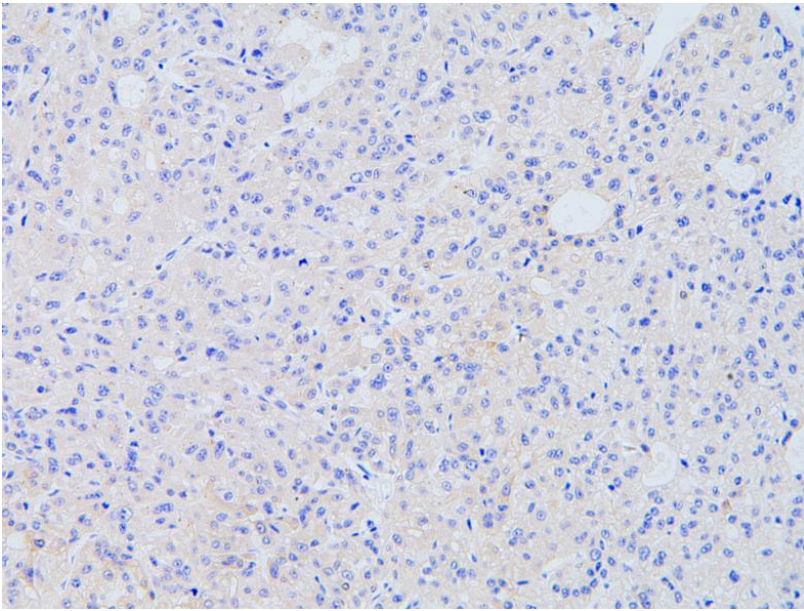

patient 9

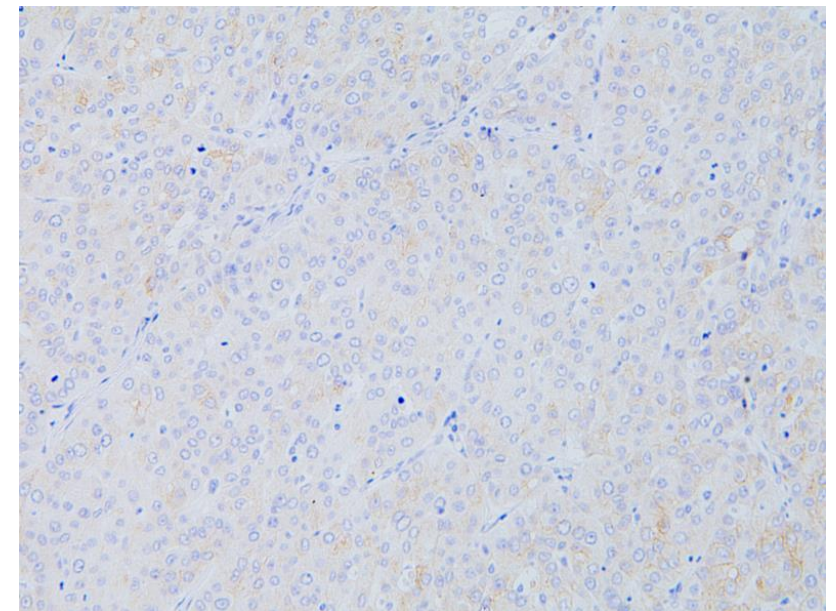

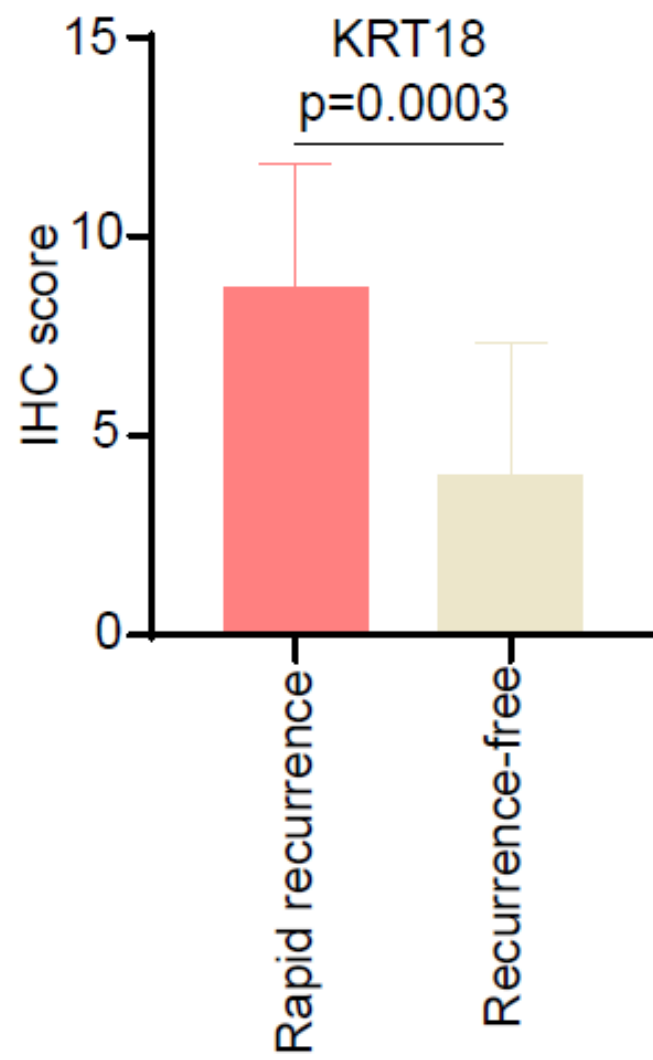

**Immunohistochemical staining showing increased KRT20 expressions in the resected tumors originated from the rapid recurrence HCC patients compared to the recurrence-free HCC patients.**

# rapid recurrence HCC patients

patient 1

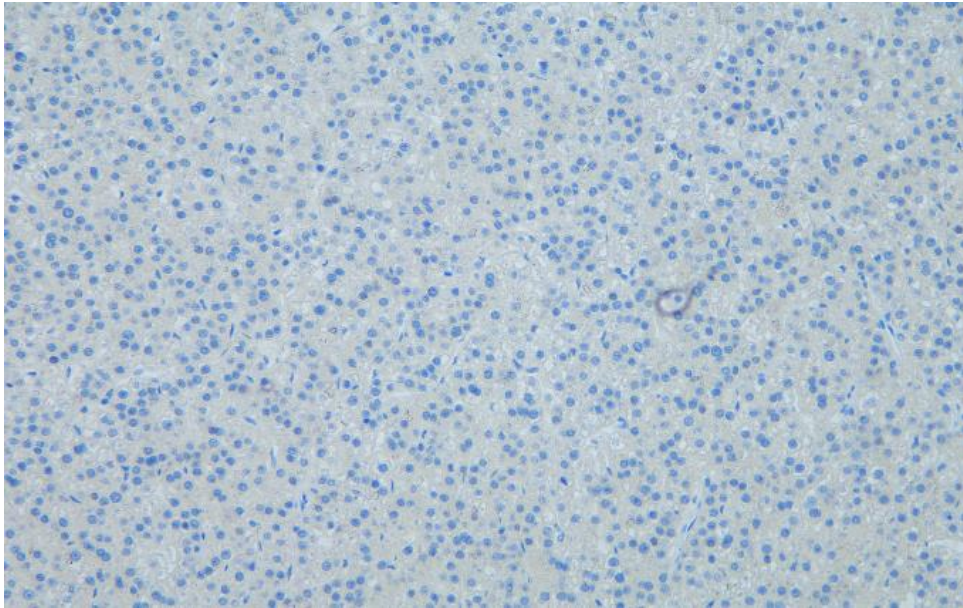

patient 2

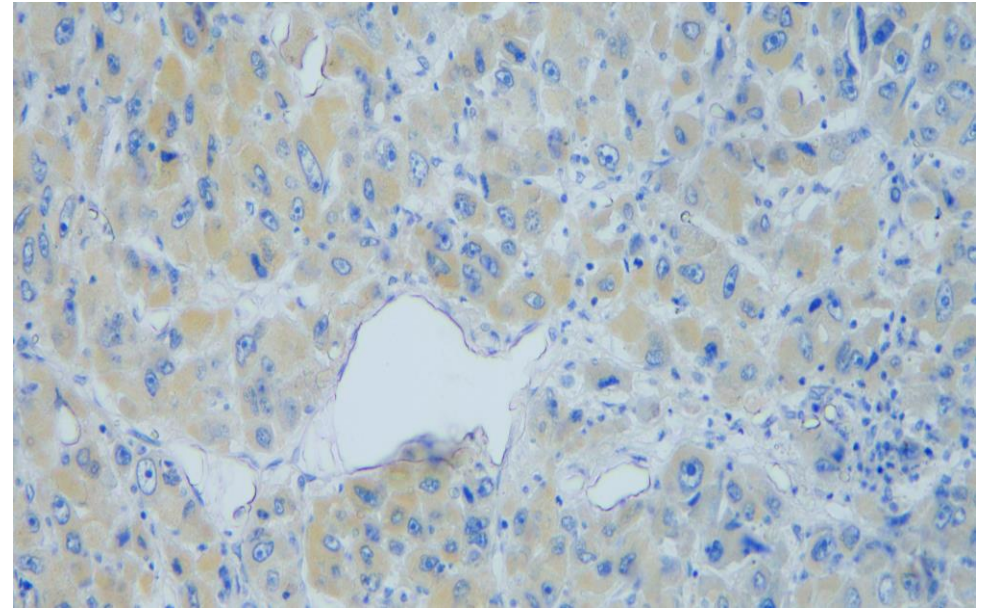

patient 3

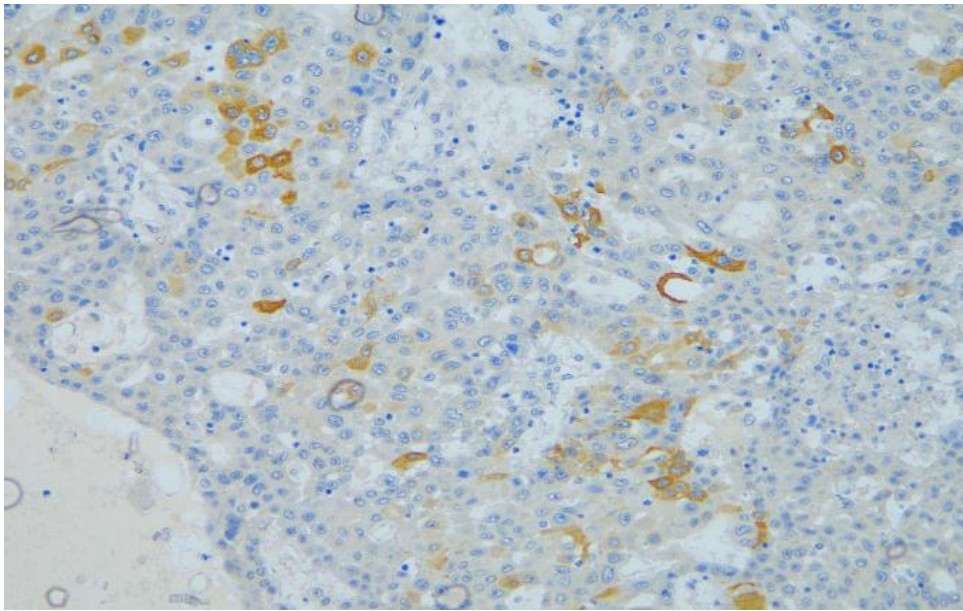

patient 4

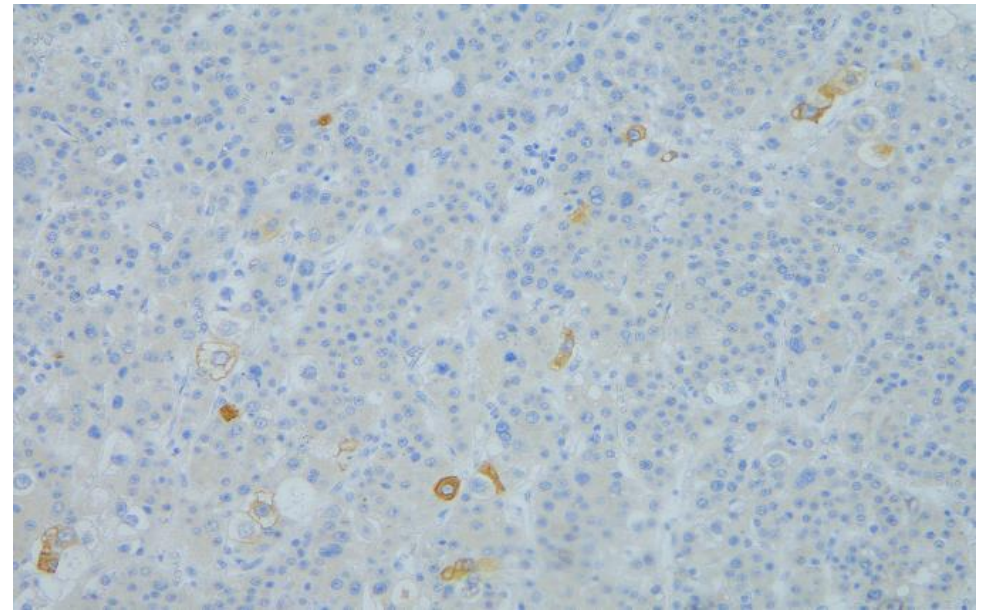

# rapid recurrence HCC patients

patient 5



patient 6

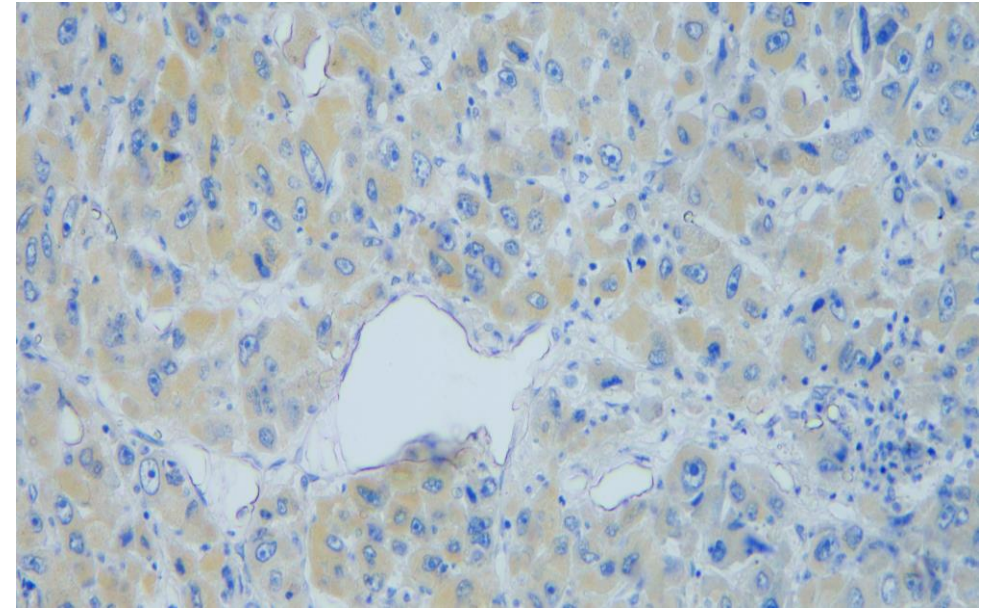

patient 7

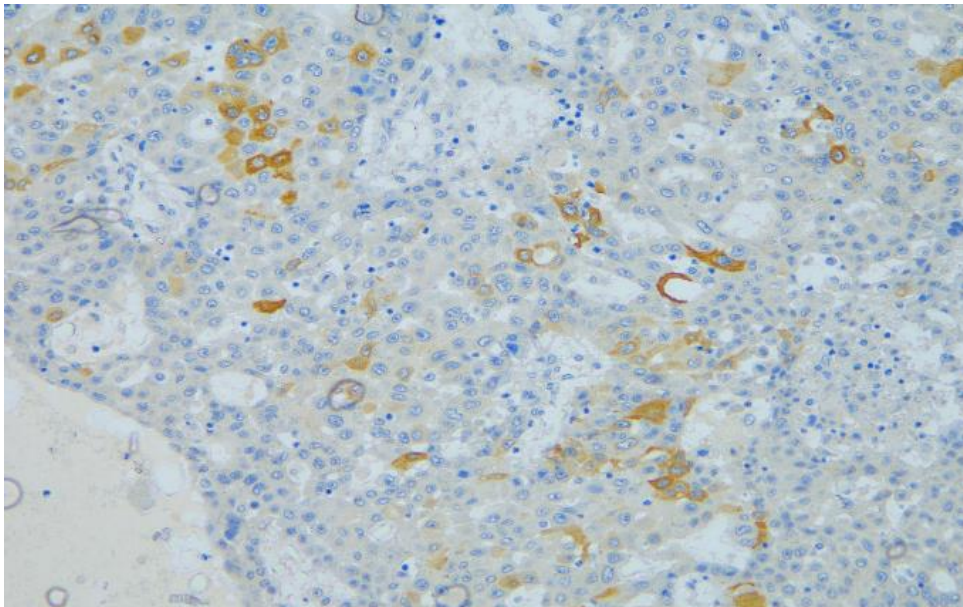

patient 8

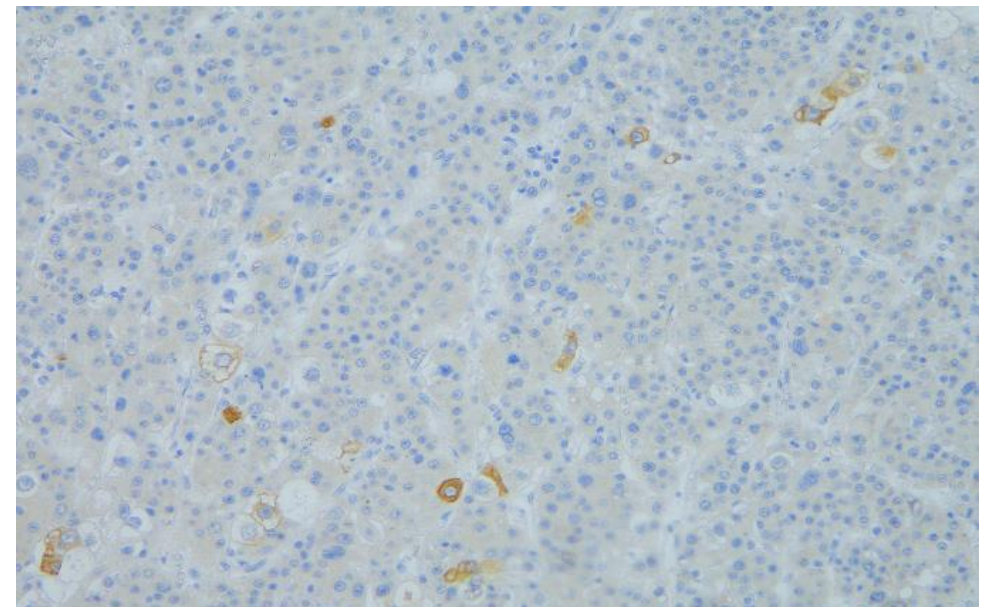



# rapid recurrence HCC patients

patient 9

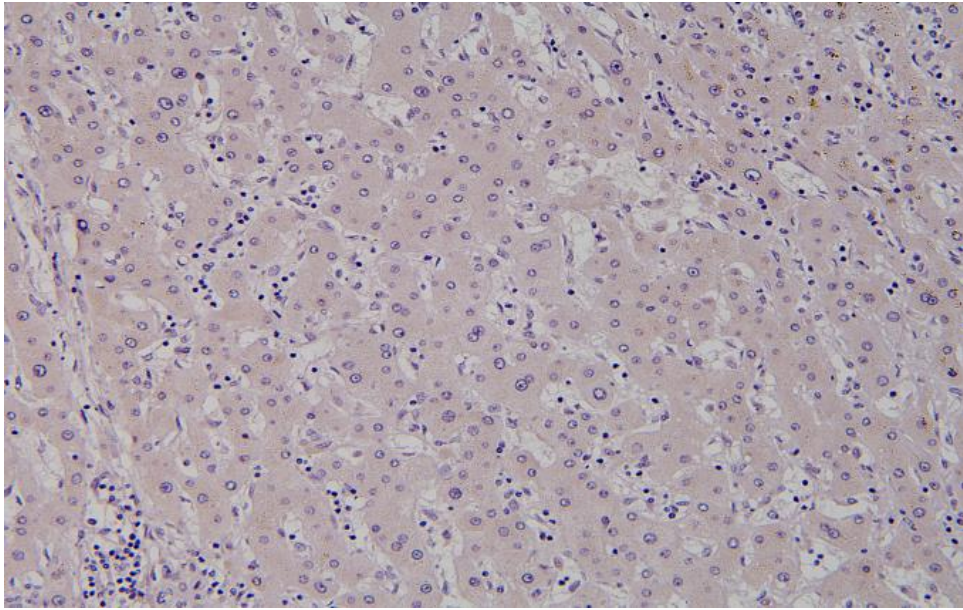

patient 10

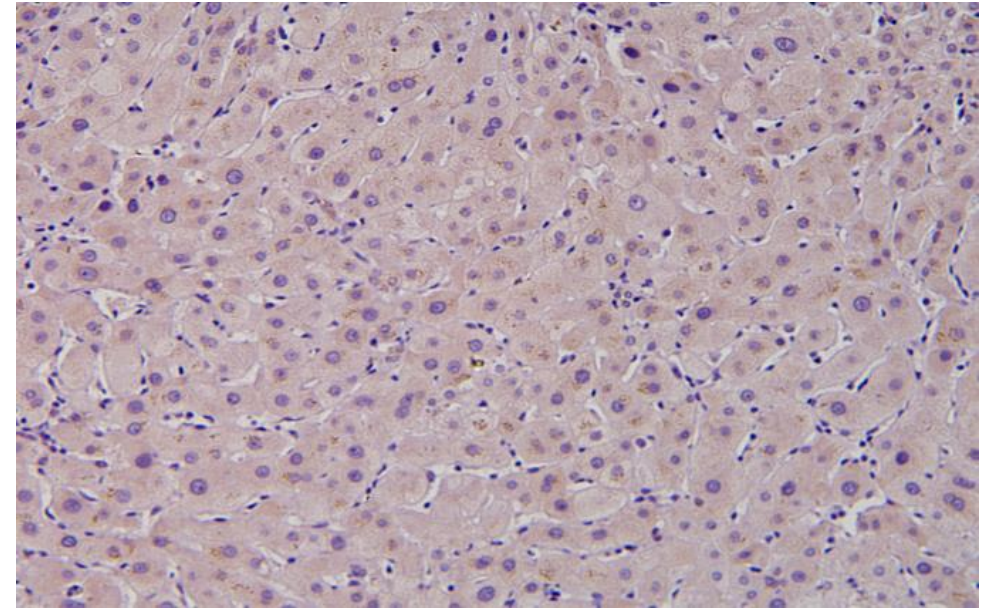

patient 11

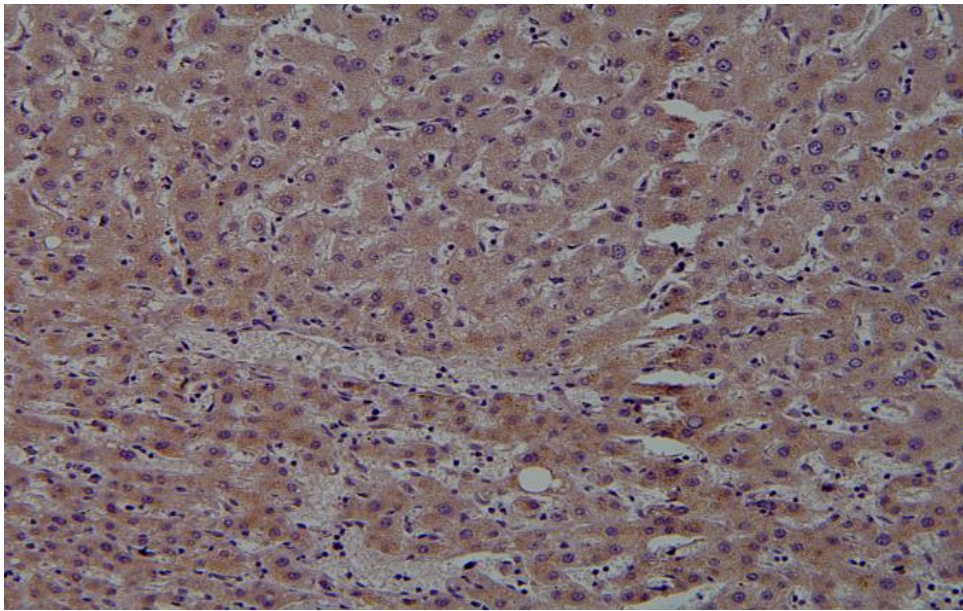

patient 12

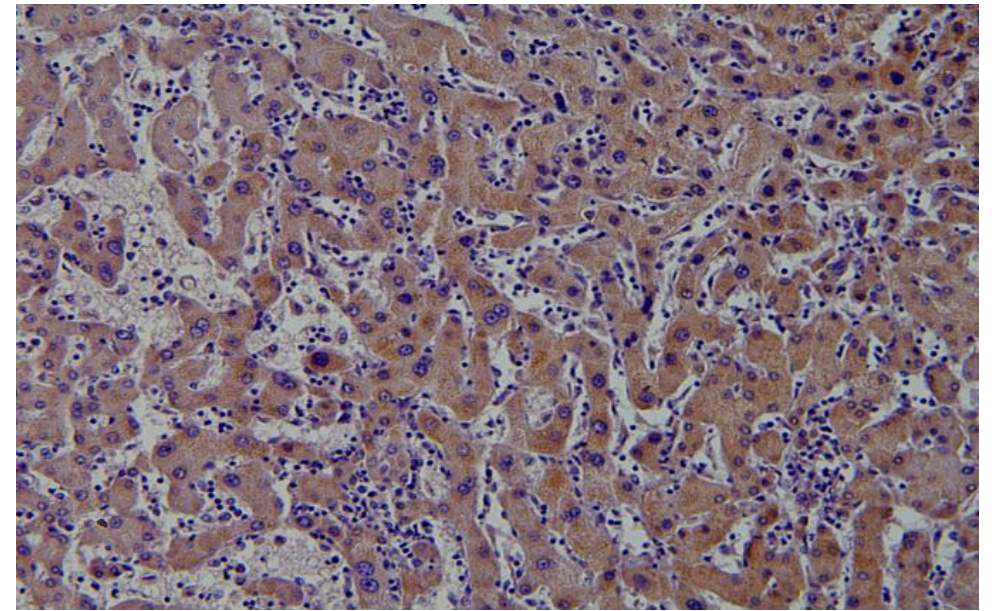

**rapid recurrence HCC patients**  
patient 13

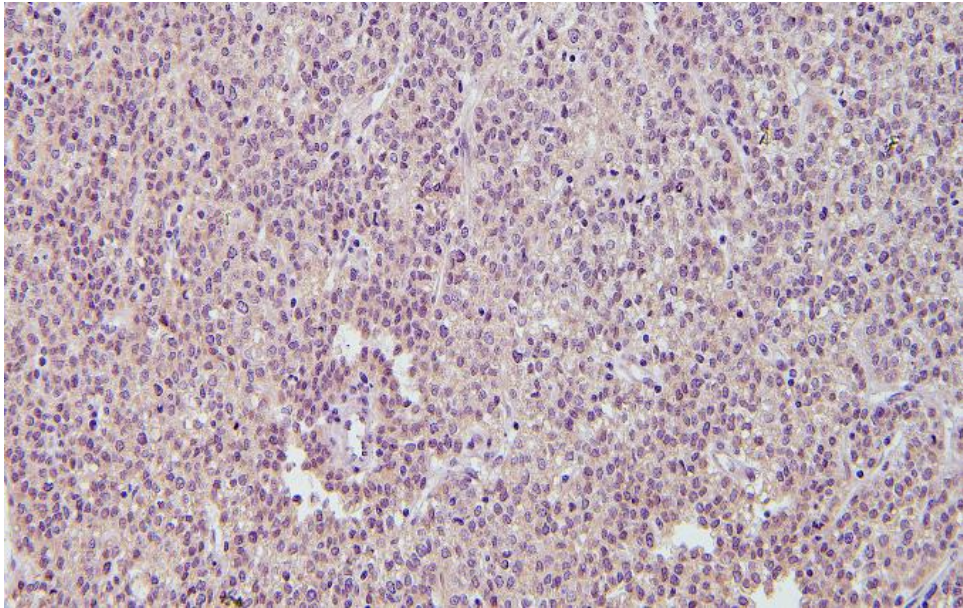

patient 14

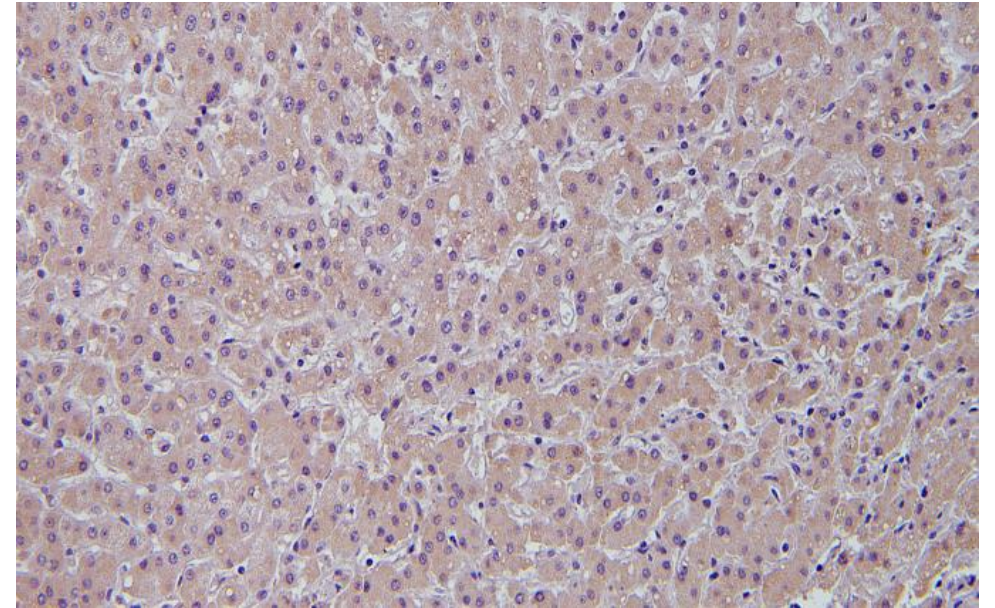

patient 15

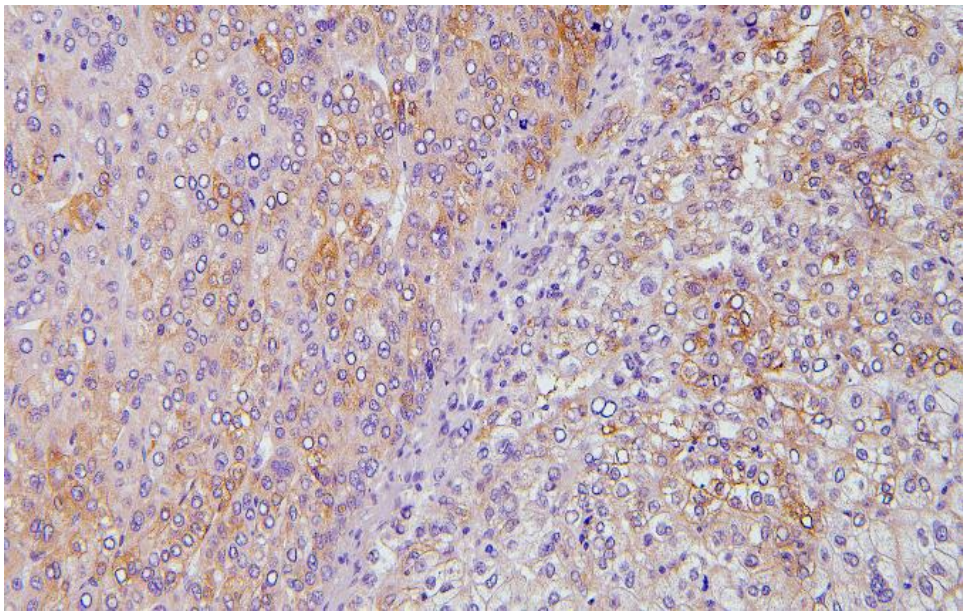

patient 16

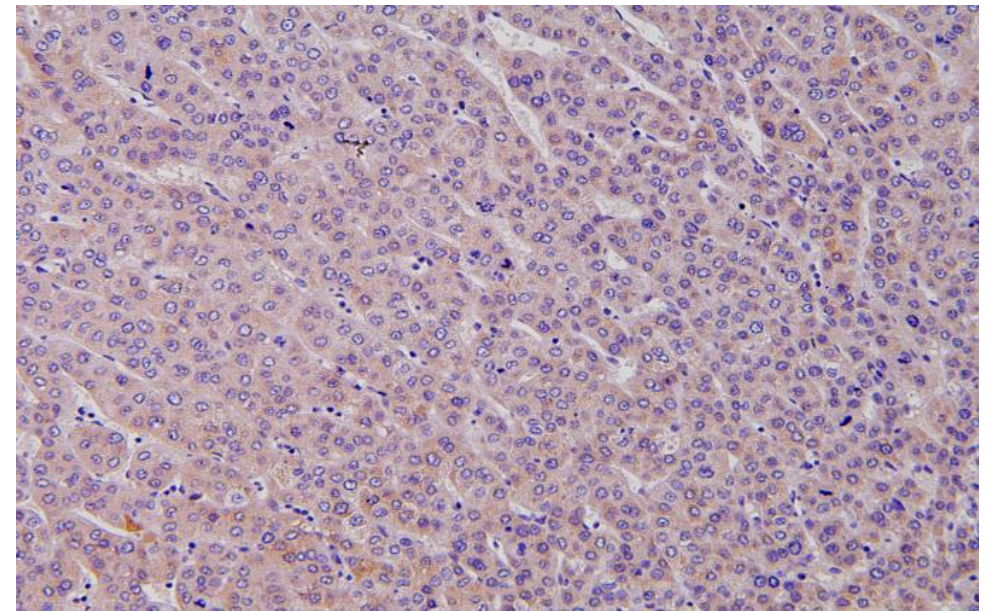

# rapid recurrence HCC patients

patient 17

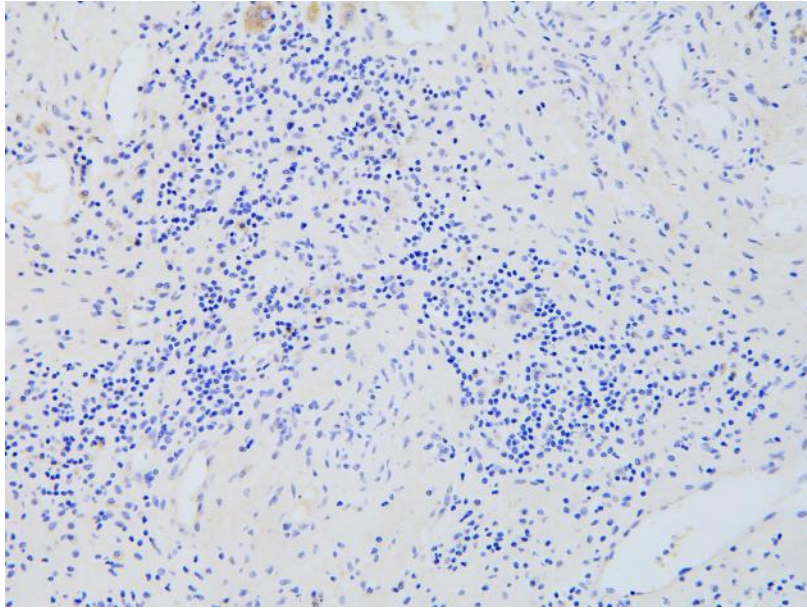

patient 18

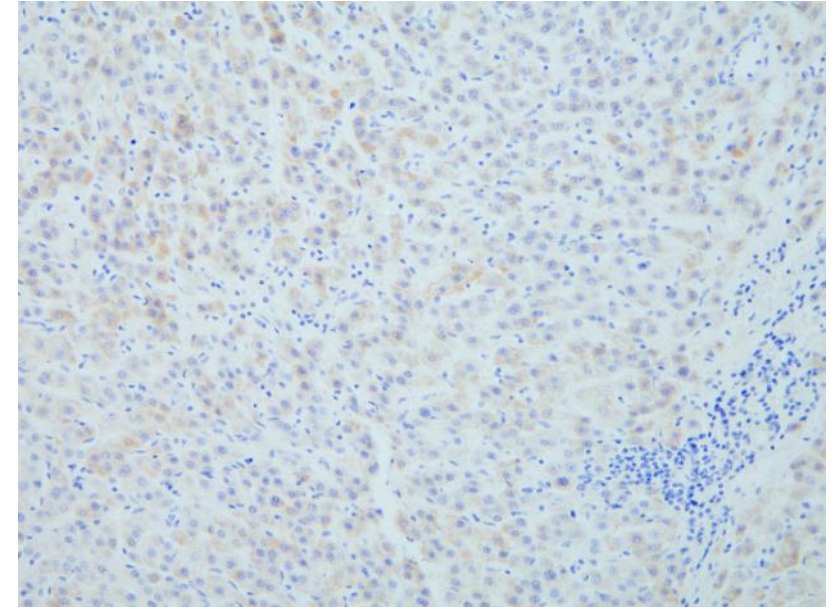

patient 19

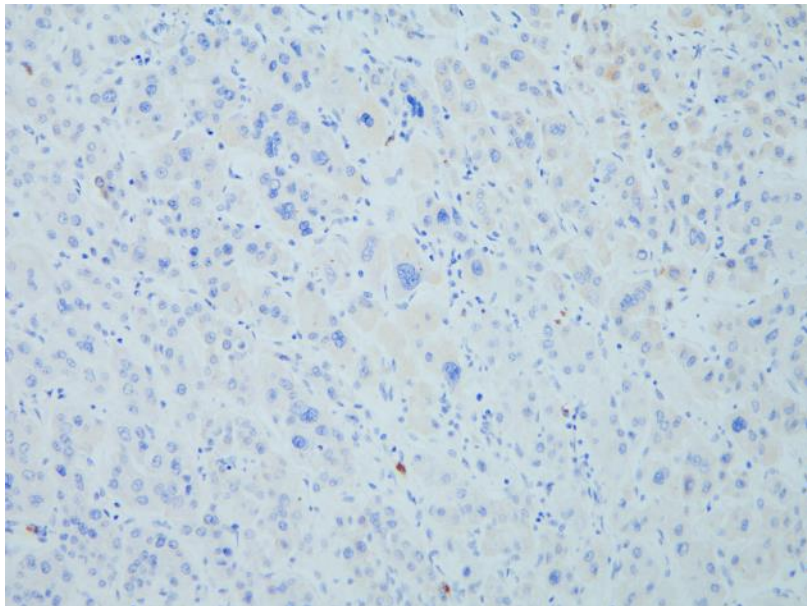

patient 20

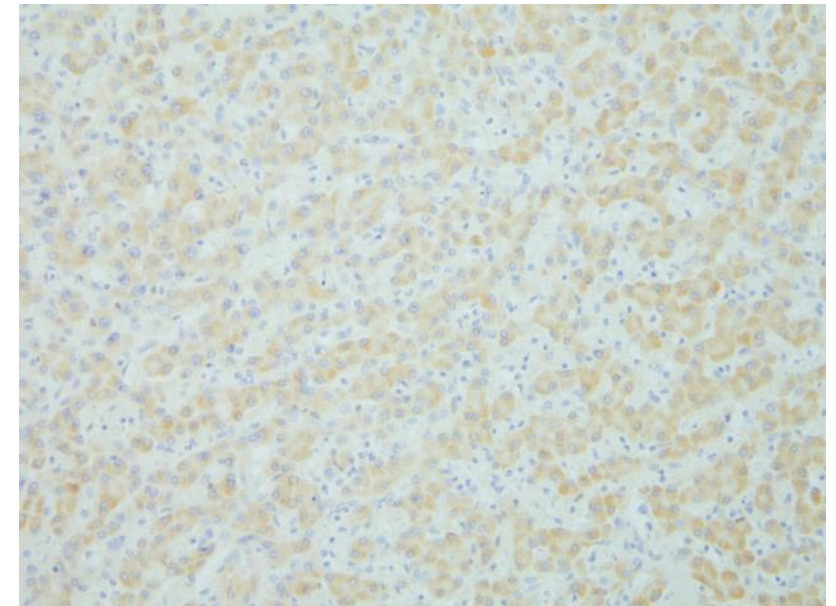

# rapid recurrence HCC patients

patient 21

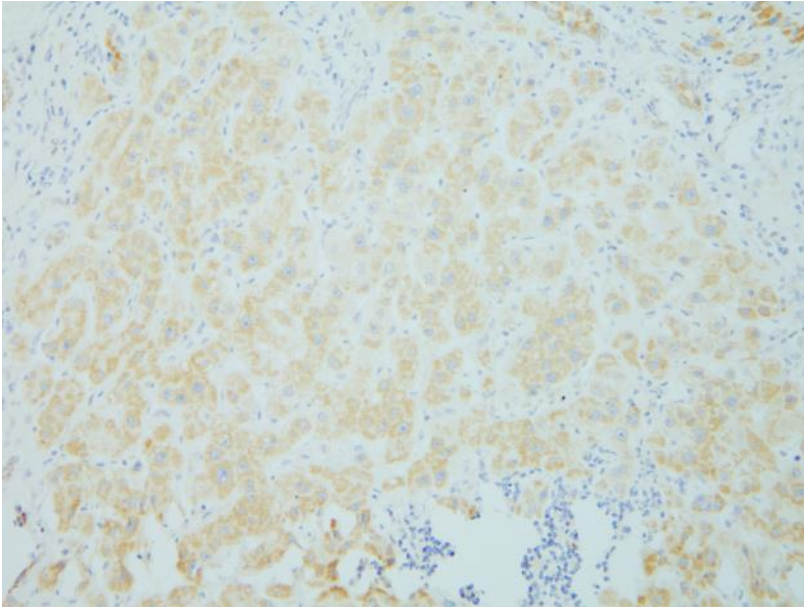

patient 22

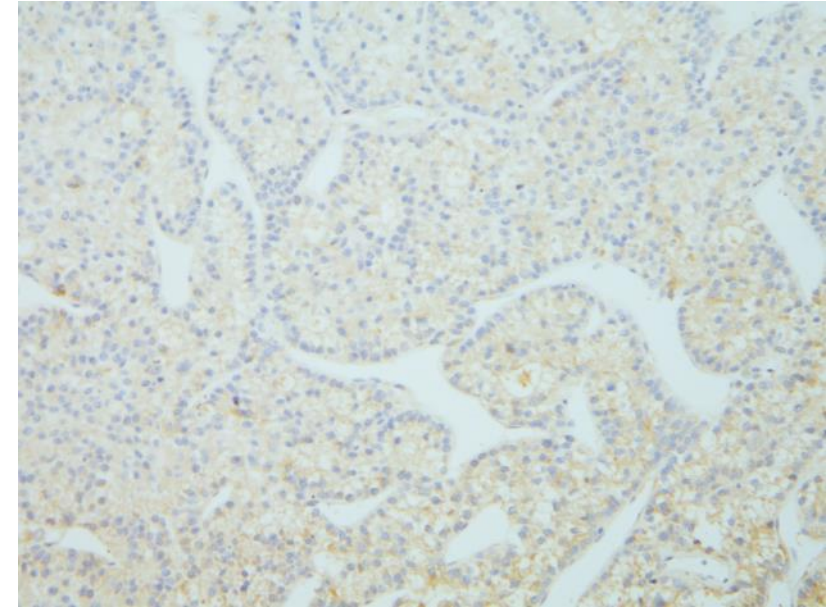

patient 23

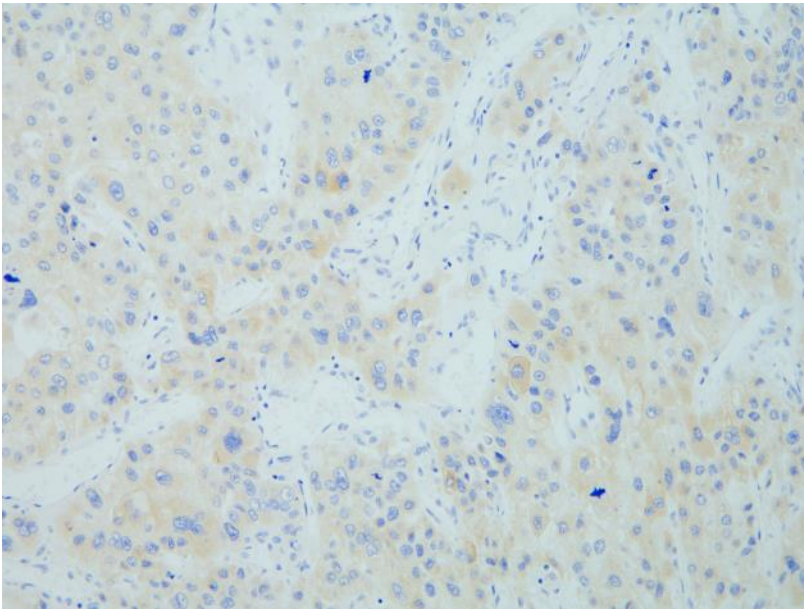

patient 24

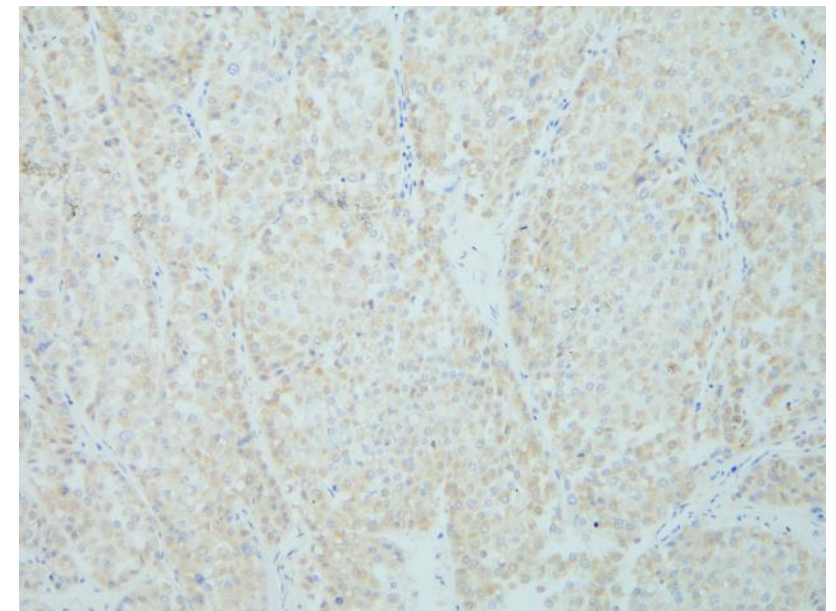

# rapid recurrence HCC patients

patient 25

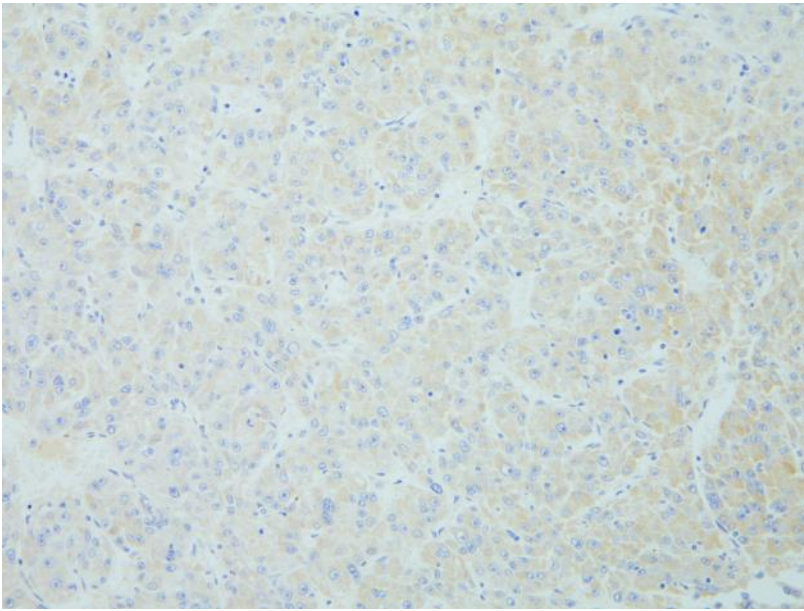

patient 26

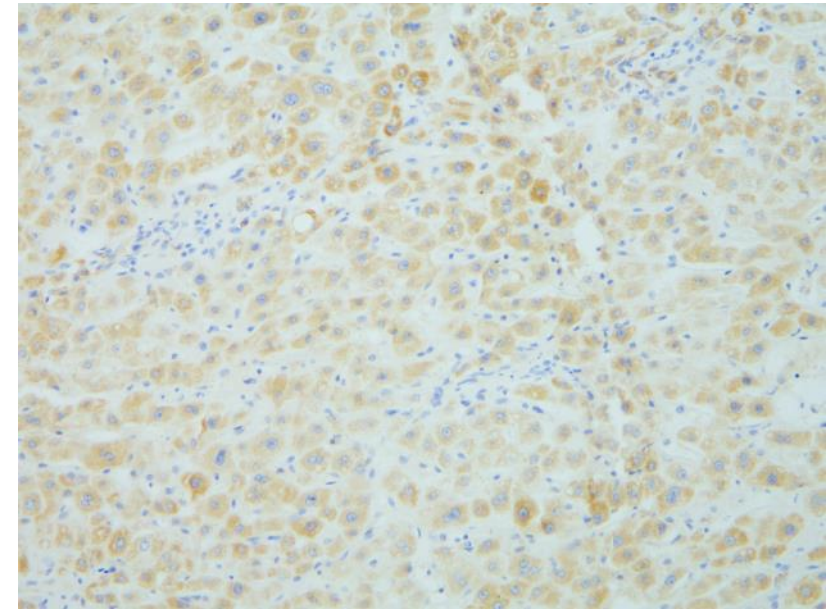

patient 27

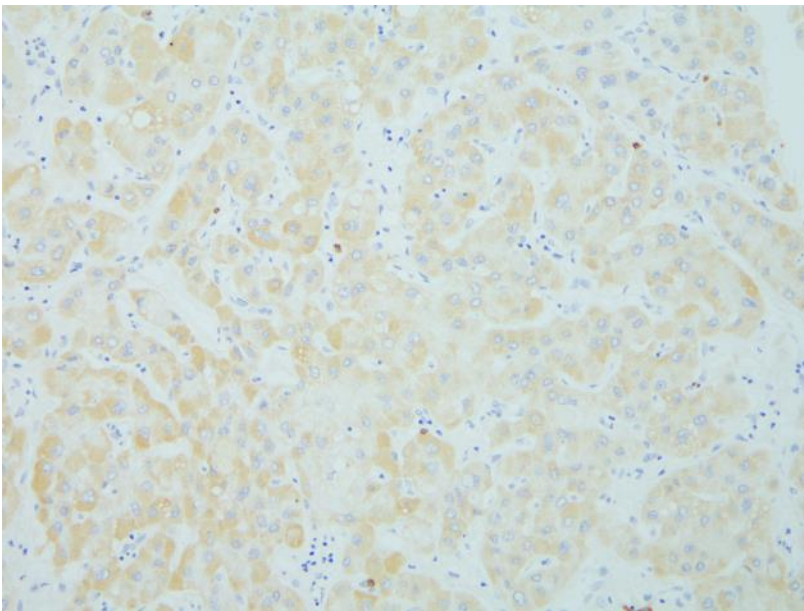

patient 28

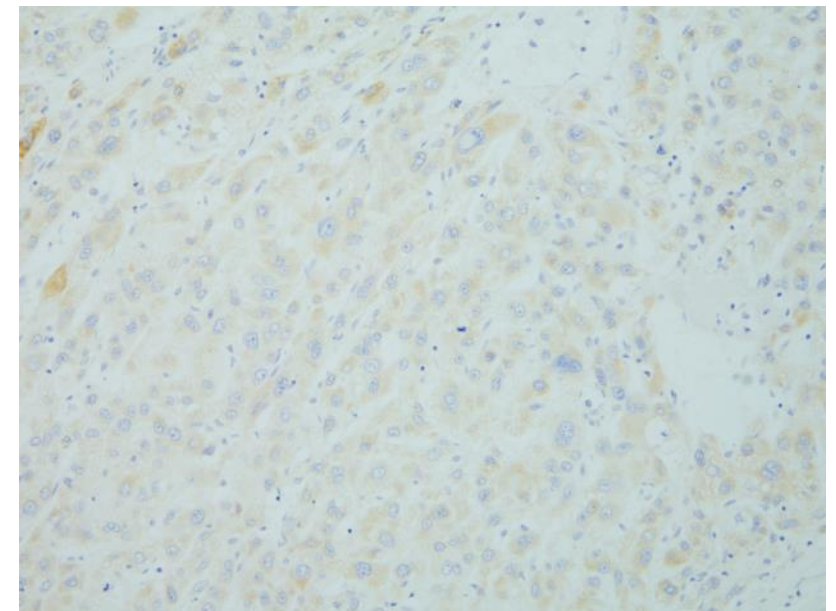

# rapid recurrence HCC patients

patient 29

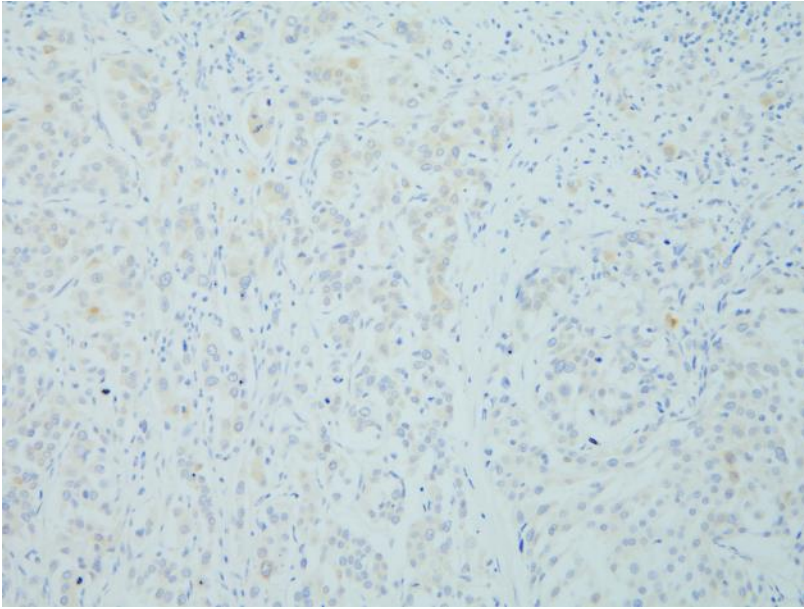

patient 30

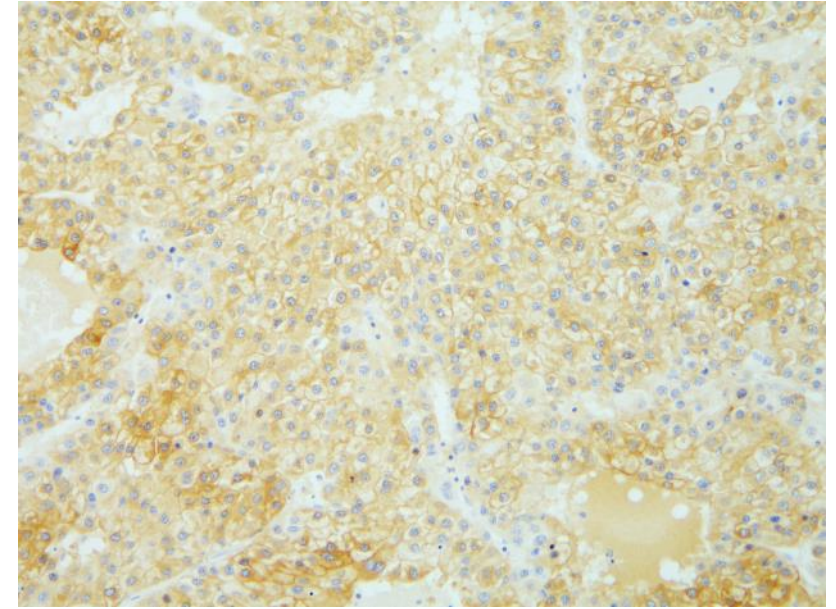

patient 31

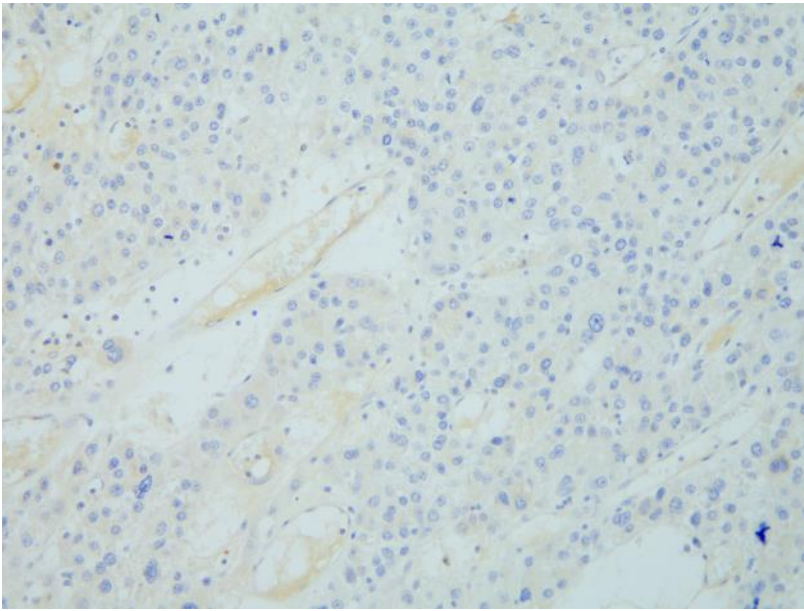

patient 32

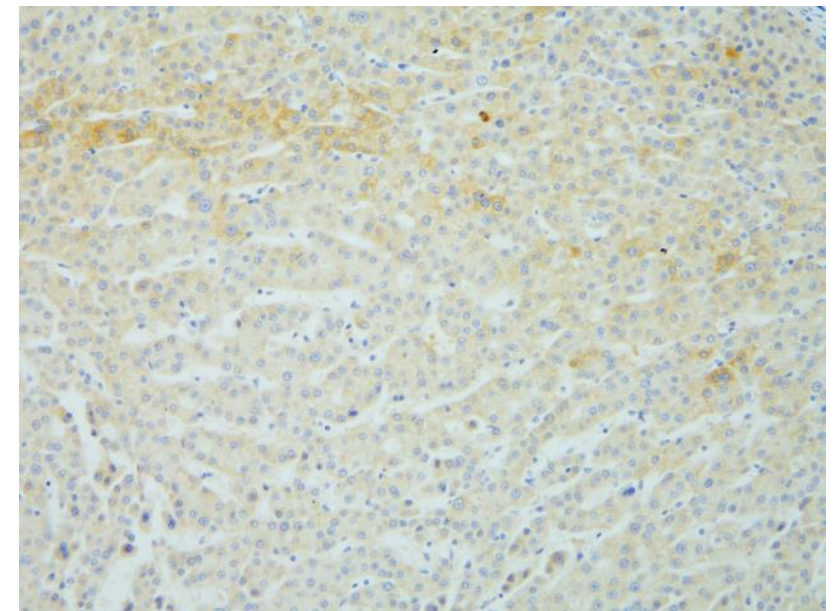

# the recurrence-free HCC patients

patient 1

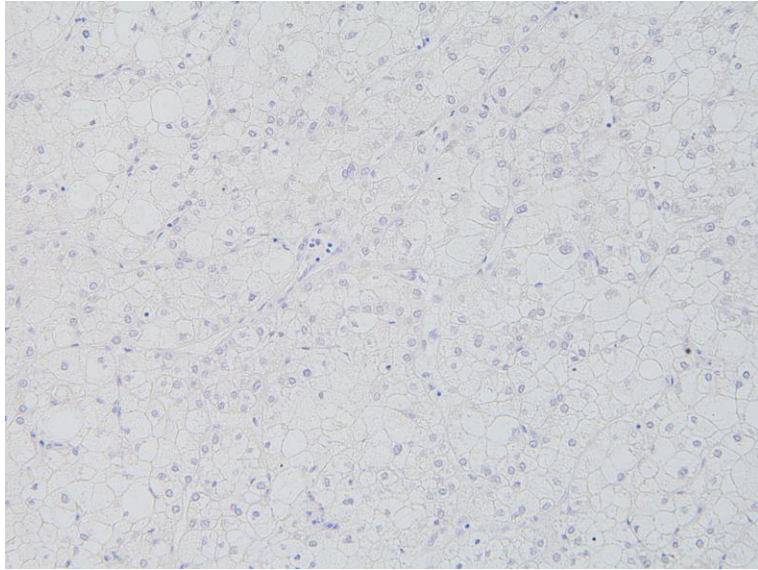

patient 2

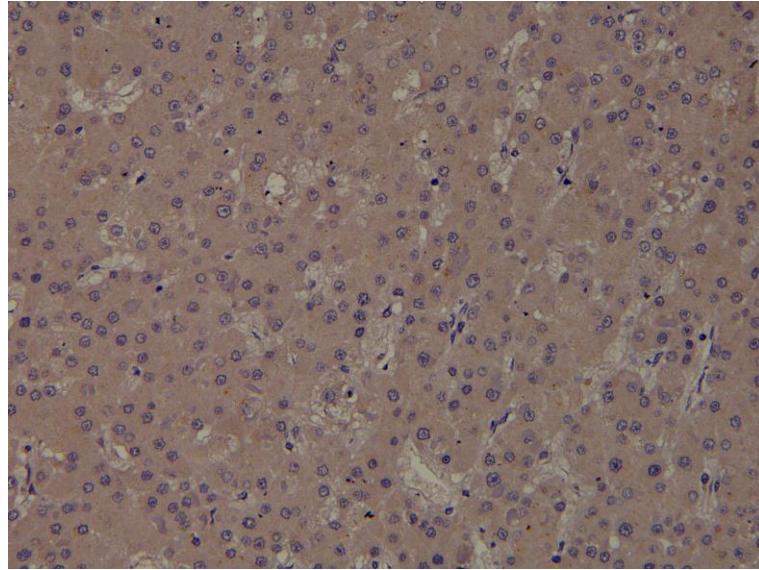

patient 3

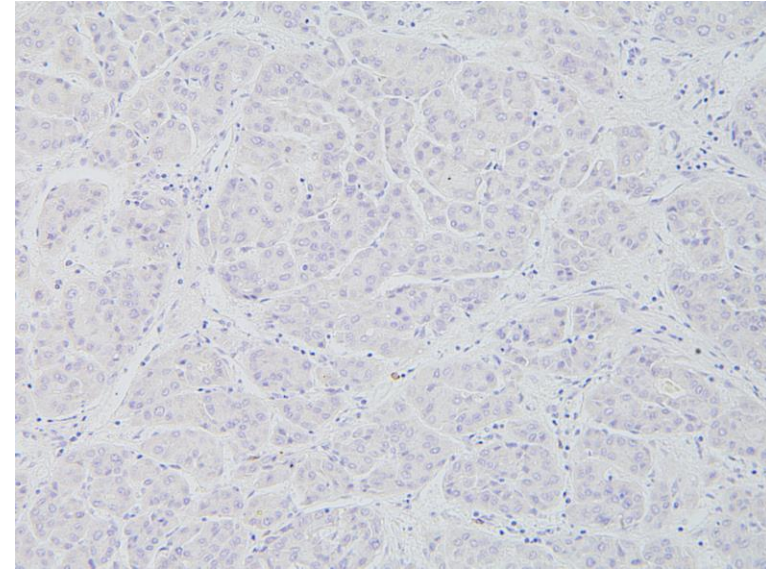

patient 4

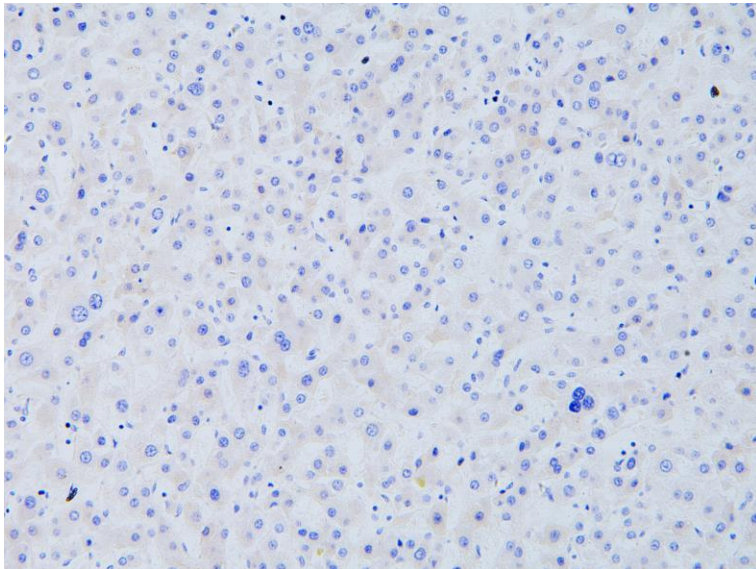

patient 5

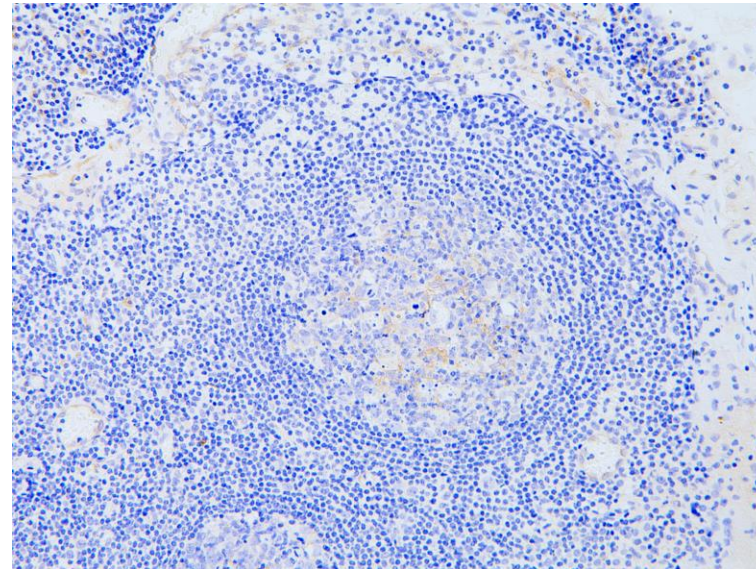

# the recurrence-free HCC patients

patient 6

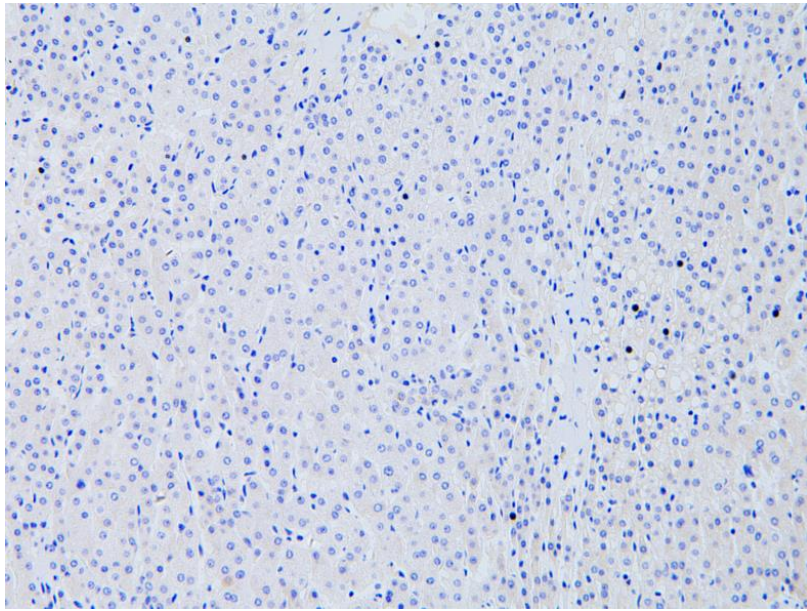

patient 7

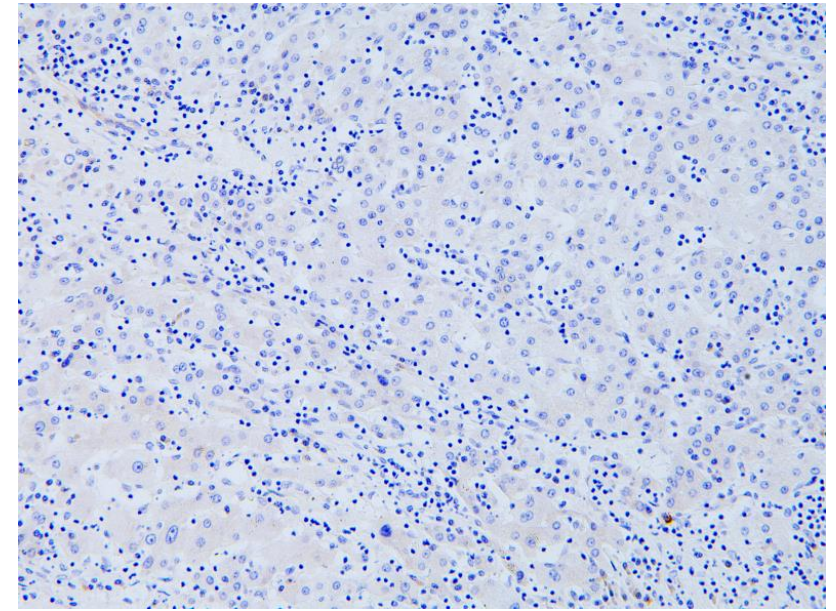

patient 8

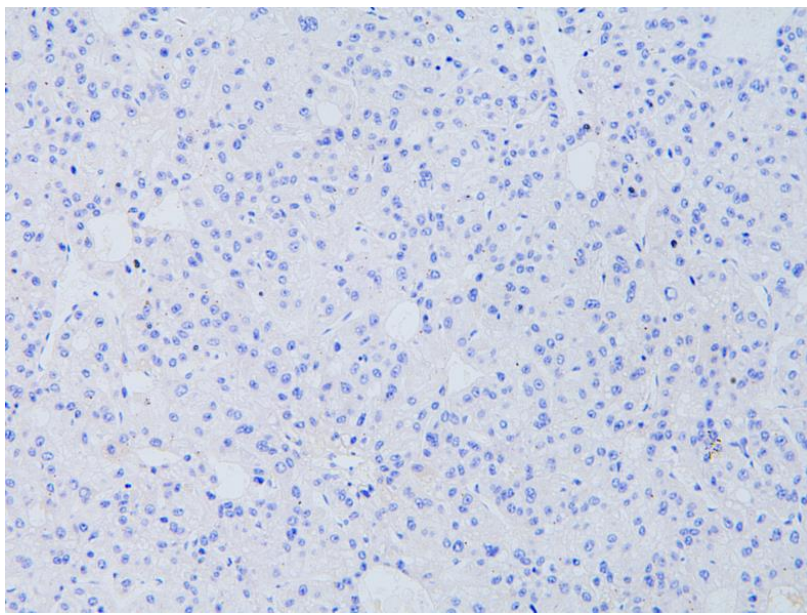

patient 9

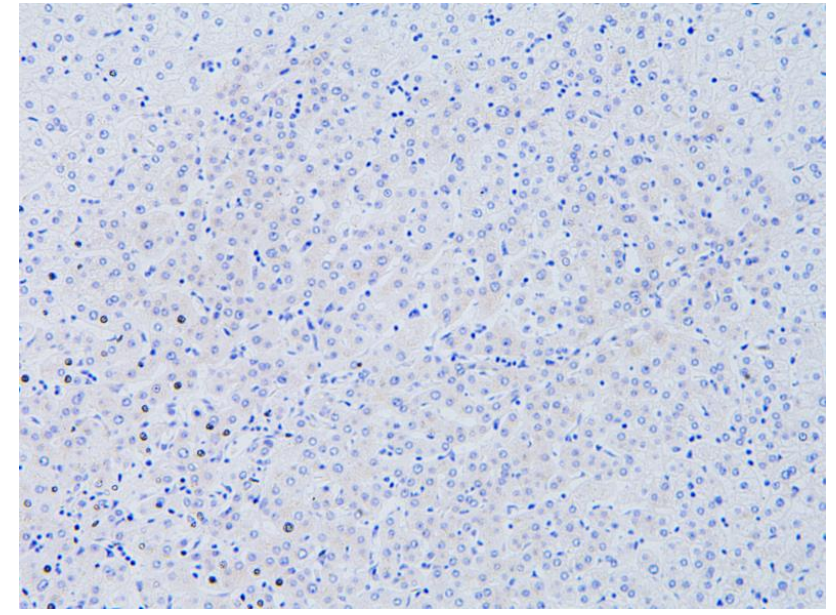



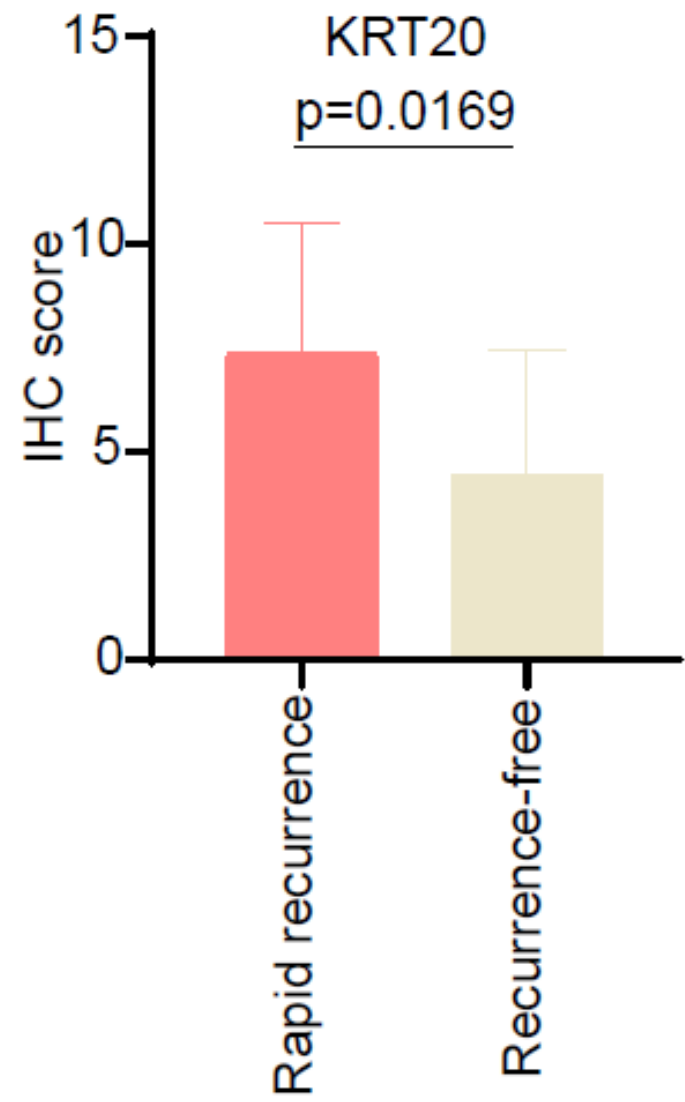

Supplement: 41698_2024_752_MOESM1_ESM.pdf [file 41698_2024_752_MOESM1_ESM.pdf]
